# Supplementary material for: Nonmetal-catalyzed hydroamination of ynamides with amines
Source: Royal Society of Chemistry journal article supplement (doi:10.1039/d1qo01052b), 2021-01-01

SUPPORTING INFORMATION

**Nonmetal-catalyzed hydroamination of ynamides with amines**

Yanru Wang, Zhen Zhao, Songkui Lv, Lixia Ding, Xiao-Na Wang,\* and Junbiao Chang\*

Collaborative Innovation Center of New Drug Research and Safety Evaluation, Henan Province, Key Laboratory of Advanced Drug Preparation Technologies, Ministry of Education, School of Pharmaceutical Sciences, Zhengzhou University, Zhengzhou, Henan 450001, P. R. China.

**Table of Contents**

|                                                                                         |     |
|-----------------------------------------------------------------------------------------|-----|
| Part I Experimental Part.....                                                           | S2  |
| General Information.....                                                                | S2  |
| 1.1 Synthesis of Ynamides <b>2</b> .....                                                | S2  |
| 1.2 Condition Optimization of the Hydroamination with Anilines (Table S1).....          | S3  |
| 1.3 Hydroamination of Ynamide <b>2a</b> with Different Anilines (Table 2).....          | S4  |
| 1.4 Hydroamination of Different Ynamides with Aniline <b>1a</b> (Table 3).....          | S19 |
| 1.5 Condition Optimization of the Hydroamination with Secondary Amines (Table S2). .... | S29 |
| 1.6 Hydroamination of Ynamides with Secondary Amines (Table 4).....                     | S30 |
| 1.7 Application to the Construction of 2-Aminoindoles (Scheme 2).....                   | S54 |
| 1.8 X-Ray Crystal Structure of <b>5f</b> . ....                                         | S56 |
| References.....                                                                         | S58 |
| Part II Copies of <sup>1</sup> H NMR, <sup>13</sup> C NMR and NOESY Spectra.....        | S59 |

## Part I Experimental Part

### General Information

Unless otherwise indicated, all starting materials were obtained from commercial supplies and used as received. All amines were purchased. All reactions were performed in oven-dried glassware under nitrogen atmosphere. Solvents were distilled prior to use. Chromatographic separations were performed using 200~300 mesh silica gel.  $^1\text{H}$  NMR and  $^{13}\text{C}$  NMR spectra were obtained on a Bruker's Ascend<sup>TM</sup> 400 NMR spectrometer using  $\text{CDCl}_3$  as solvent with TMS or residual solvent as standard unless otherwise noted.  $^{13}\text{C}$  NMR (100 MHz) spectra were reported in ppm with the internal chloroform signal at 77.2 ppm as a standard. Infrared spectra were obtained on a PerkinElmer FT/IR spectrophotometer and relative intensities are expressed qualitatively as s (strong), m (medium), and w (weak). TLC analysis was performed using 254 nm polyester-backed plates and visualized using UV and  $\text{KMnO}_4$  stain. High-resolution mass spectra (HRMS) were performed on a Bruker MicrOTOF-Q II mass spectrometer.

### 1.1 Synthesis of Ynamides **2**.

Ynamides **2a**<sup>1</sup>, **2b**<sup>2</sup>, **2c**<sup>3</sup>, **2d**<sup>4</sup>, **2e**<sup>5</sup>, **2f**<sup>6</sup>, **2g**<sup>6</sup>, **2h**<sup>7</sup>, **2i**<sup>8</sup>, **2j**<sup>1</sup>, **2k**<sup>1</sup>, **2l**<sup>9</sup>, **2m**<sup>10</sup>, **2n**<sup>11</sup>, **2o**<sup>12</sup>, **2p**<sup>13</sup>, **2q**<sup>14</sup>, **2s**<sup>15</sup> and **2t**<sup>1</sup> were known compounds and synthesized according to corresponding literatures, the data were matched with reported values. Ynamide **2r** was new compounds and synthesized according to literatures<sup>8</sup>.

#### Synthesis of Ynamide **2r**.<sup>8</sup>

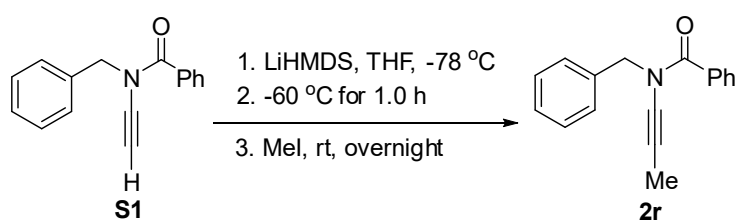

To an oven-dried flask were charged with ynamide **S1**<sup>16</sup> (470.6 mg, 2.00 mmol) and THF (10.0 mL, ynamide concn = 0.20 M). To this solution at -78 °C was added LiHMDS (3.0 mL, 1.0 M in THF), and then the mixture was allowed to warm to -60 °C. After the reaction was stirred at -60 °C for 1.0 h, MeI (0.25 mL, 4.00 mmol) was added, the resulting mixture was warmed to rt slowly, stirred overnight (12.0 h) and monitored using TLC analysis, water (10.0 mL) was added to quench the reaction. The quench mixture was extracted with EtOAc, dried over anhydrous  $\text{Na}_2\text{SO}_4$ , filtered through a pad of silica gel, concentrated in vacuo, and purified by silica gel flash column

chromatography [gradient eluent: 40:1~35:1 petroleum ether/EtOAc] to afford ynamide **2r** (274.2 mg, 1.10 mmol) in 55% yield.

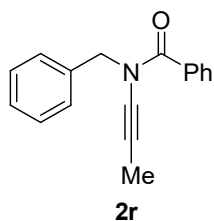

**2r**:  $R_f = 0.41$  [20:1 petroleum ether/EtOAc]; yellow oil;  $^1\text{H}$  NMR (400 MHz,  $\text{CD}_3\text{COCD}_3$ )  $\delta$  7.81-7.78 (m, 2H), 7.55-7.51 (m, 1H), 7.49-7.42 (m, 4H), 7.41-7.36 (m, 2H), 7.35-7.31 (m, 1H), 4.84 (s, 2H), 1.71 (s, 3H);  $^{13}\text{C}$  NMR (100 MHz,  $\text{CD}_3\text{COCD}_3$ )  $\delta$  170.8, 137.7, 135.1, 131.9, 129.3, 129.2, 129.0, 128.6, 128.5, 76.0, 68.5, 53.1, 2.8; IR (neat) ( $\text{cm}^{-1}$ ) 3028w, 1666s, 1579w, 1392m, 1290s, 1136m; HRMS (ESI):  $m/z$  calcd for  $\text{C}_{17}\text{H}_{15}\text{NO}$   $[\text{M}+\text{H}]^+$ : 250.1226; found 250.1225.

## 1.2 Condition Optimization of the Hydroamination with Anilines (Table S1).

**Table S1. Condition Optimization of the Hydroamination with Anilines**

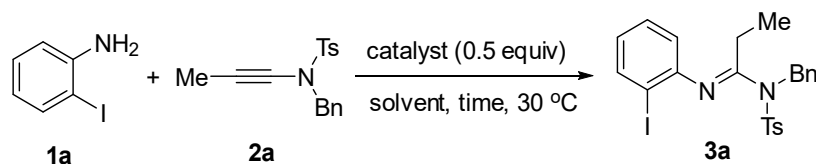

| entry <sup>a</sup> | catalyst           | solvent                  | time (h) | yield (%) <sup>b</sup> |
|--------------------|--------------------|--------------------------|----------|------------------------|
| 1                  | TEA                | DCE                      | 21.0     | 15 <sup>c</sup>        |
| 2                  | CSA                | DCE                      | 24.0     | 16 <sup>d</sup>        |
| 3                  | TfOH               | DCE                      | 0.5      | 94                     |
| 4                  | Tf <sub>2</sub> NH | DCE                      | 0.5      | 93                     |
| 5                  | Tf <sub>2</sub> O  | DCE                      | 0.5      | 89                     |
| 6                  | TfOMe              | DCE                      | 0.5      | 91                     |
| 7                  | TMSOTf             | DCE                      | 0.5      | 92                     |
| 8                  | TfOH               | $\text{CH}_2\text{Cl}_2$ | 0.5      | 88                     |
| 9                  | TfOH               | toluene                  | 0.5      | 83                     |
| 10                 | TfOH               | THF                      | 2.0      | 22                     |
| 11                 | TfOH               | 1,4-dioxane              | 2.0      | 77                     |
| 12 <sup>e</sup>    | TfOH               | DCE                      | 0.5      | 93                     |

<sup>a</sup>Unless otherwise specified, reactions were carried out using **1a** (0.30 mmol), **2a** (0.25 mmol) with catalyst (0.125 mmol) in solvent (0.625 mL) at 30 °C.

<sup>b</sup>Isolated yields. <sup>c</sup>36% of **2a** was recovered. <sup>d</sup>33% of **2a** was recovered <sup>e</sup>**1a** (1.20 mmol) and **2a** (1.00 mmol) were added.

Entry 12: To an oven-dried sealed tube was added aniline **1a** (262.8 mg, 1.20 mmol), ynamide **2a**<sup>1</sup>

(299.4 mg, 1.00 mmol), DCE (2.5 mL, ynamide *concn* = 0.40 M), and TfOH (44.3  $\mu$ L, 0.50 mmol) at 30 °C. The reaction vessel was capped and stirred at 30 °C for 0.5 h. After the reaction was judged to be complete by TLC, the reaction mixture was cooled to rt, filtered through a pad of silica gel, concentrated in vacuo, and purified by flash silica gel column chromatography [gradient eluent: 25:1~20:1 petroleum ether/EtOAc] to afford *N*-arylimine **3a** (481.5 mg, 0.93 mmol) in 93% yield.

### 1.3 Hydroamination of Ynamide **2a** with Different Anilines (Table 2).

*N*-arylimines **3a-3ee** were new compounds.

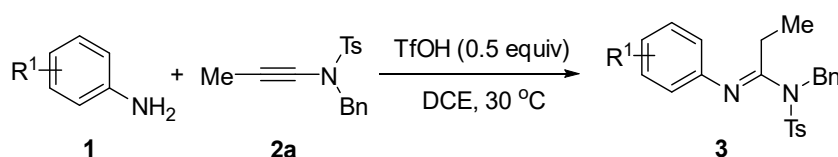

To an oven-dried sealed tube was added aniline **1a** (65.7 mg, 0.30 mmol), ynamide **2a** (74.9 mg, 0.25 mmol), DCE (0.625 mL, ynamide *concn* = 0.40 M), and TfOH (11.1  $\mu$ L, 0.125 mmol) at 30 °C. The reaction vessel was capped and stirred at 30 °C for 0.5 h. After the reaction was judged to be complete by TLC, the reaction mixture was cooled to rt, filtered through a pad of silica gel, concentrated in vacuo, and purified by flash silica gel column chromatography [gradient eluent: 25:1~20:1 petroleum ether/EtOAc] to afford *N*-arylimine **3a** (121.9 mg, 0.24 mmol) in 94% yield.

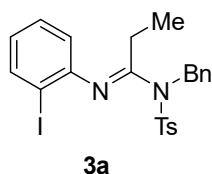

**3a**:  $R_f$  = 0.45 [10:1 petroleum ether/EtOAc]; white solid; mp = 78–79 °C; <sup>1</sup>H NMR (400 MHz, CDCl<sub>3</sub>)  $\delta$  7.84 (d, 2H,  $J$  = 8.4 Hz), 7.74 (dd, 1H,  $J$  = 8.0, 1.4 Hz), 7.43–7.40 (m, 2H), 7.33–7.24 (m, 5H), 7.17–7.13 (m, 1H), 6.72–6.68 (m, 1H), 6.12 (dd, 1H,  $J$  = 7.9, 1.6 Hz), 4.96 (s, 2H), 2.50–2.44 (m, 5H), 0.92 (t, 3H,  $J$  = 7.5 Hz); <sup>13</sup>C NMR (100 MHz, CDCl<sub>3</sub>)  $\delta$  161.0, 150.1, 144.3, 139.1, 137.1, 136.8, 130.0, 129.0, 128.9, 128.4, 128.0, 127.6, 124.7, 119.7, 90.0, 51.3, 26.1, 21.8, 11.6; IR (neat) (cm<sup>-1</sup>) 2924w, 1650m, 1458m, 1346s, 1227m, 1162s, 1067w; HRMS (ESI):  $m/z$  calcd for C<sub>23</sub>H<sub>23</sub>IN<sub>2</sub>O<sub>2</sub>S [M+H]<sup>+</sup>: 519.0598; found 519.0597.

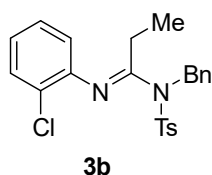

To an oven-dried sealed tube was added aniline **1b** (38.3 mg, 0.30 mmol), ynamide **2a** (74.9 mg, 0.25 mmol), DCE (0.625 mL, ynamide *concn* = 0.40 M), and TfOH (11.1  $\mu$ L, 0.125 mmol) at 30 °C.

The reaction vessel was capped and stirred at 30 °C for 1.0 h. After the reaction was judged to be complete by TLC, the reaction mixture was cooled to rt, filtered through a pad of silica gel, concentrated in vacuo, and purified by flash silica gel column chromatography [gradient eluent: 30:1~20:1 petroleum ether/EtOAc] to afford *N*-arylimine **3b** (102.8 mg, 0.24 mmol) in 96% yield.

**3b**:  $R_f = 0.46$  [10:1 petroleum ether/EtOAc]; white solid; mp = 91–92 °C;  $^1\text{H}$  NMR (400 MHz,  $\text{CDCl}_3$ )  $\delta$  7.81 (d, 2H,  $J = 8.4$  Hz), 7.42–7.40 (m, 2H), 7.34–7.24 (m, 6H), 7.09–7.05 (m, 1H), 6.94–6.90 (m, 1H), 6.19 (dd, 1H,  $J = 7.8, 1.6$  Hz), 4.87 (s, 2H), 2.48 (q, 2H,  $J = 7.5$  Hz), 2.44 (s, 3H), 0.86 (t, 3H,  $J = 7.5$  Hz);  $^{13}\text{C}$  NMR (100 MHz,  $\text{CDCl}_3$ )  $\delta$  161.7, 145.6, 144.4, 136.8, 136.2, 129.9, 129.8, 129.1, 128.3, 127.8, 127.6, 127.4, 124.3, 123.9, 120.9, 51.3, 26.5, 21.8, 11.3; IR (neat) ( $\text{cm}^{-1}$ ) 2924w, 1654s, 1467m, 1347s, 1226m, 1161s; HRMS (ESI):  $m/z$  calcd for  $\text{C}_{23}\text{H}_{23}\text{ClN}_2\text{O}_2\text{S}$  [ $\text{M}+\text{H}$ ] $^+$ : 427.1242; found 427.1243.

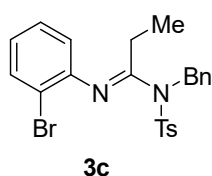

To an oven-dried sealed tube was added aniline **1c** (51.6 mg, 0.30 mmol), ynamide **2a** (74.9 mg, 0.25 mmol), DCE (0.625 mL, ynamide *concn* = 0.40 M), and TfOH (11.1  $\mu\text{L}$ , 0.125 mmol) at 30 °C. The reaction vessel was capped and stirred at 30 °C for 1.0 h. After the reaction was judged to be complete by TLC, the reaction mixture was cooled to rt, filtered through a pad of silica gel, concentrated in vacuo, and purified by flash silica gel column chromatography [gradient eluent: 30:1~20:1 petroleum ether/EtOAc] to afford *N*-arylimine **3c** (105.9 mg, 0.22 mmol) in 90% yield.

**3c**:  $R_f = 0.48$  [10:1 petroleum ether/EtOAc]; white solid; mp = 92–93 °C;  $^1\text{H}$  NMR (400 MHz,  $\text{CDCl}_3$ )  $\delta$  7.73 (d, 2H,  $J = 8.4$  Hz), 7.38 (dd, 1H,  $J = 8.0, 1.3$  Hz), 7.33–7.30 (m, 2H), 7.24–7.14 (m, 5H), 7.03–6.99 (m, 1H), 6.77–6.73 (m, 1H), 6.08 (dd, 1H,  $J = 7.9, 1.6$  Hz), 4.81 (s, 2H), 2.40 (q, 2H,  $J = 7.5$  Hz), 2.34 (s, 3H), 0.79 (t, 3H,  $J = 7.5$  Hz);  $^{13}\text{C}$  NMR (100 MHz,  $\text{CDCl}_3$ )  $\delta$  161.3, 147.0, 144.3, 136.9, 136.4, 132.9, 129.9, 129.0, 128.3, 128.1, 127.8, 127.6, 124.5, 120.7, 114.1, 51.3, 26.3, 21.7, 11.4; IR (neat) ( $\text{cm}^{-1}$ ) 2924w, 1654m, 1463w, 1347s, 1227w, 1164s, 1089m; HRMS (ESI):  $m/z$  calcd for  $\text{C}_{23}\text{H}_{23}\text{BrN}_2\text{O}_2\text{S}$  [ $\text{M}+\text{H}$ ] $^+$ : 471.0736; found 471.0737.

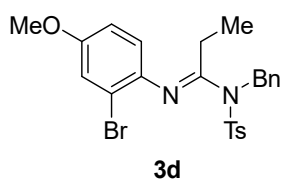

To an oven-dried sealed tube was added aniline **1d** (60.6 mg, 0.30 mmol), ynamide **2a** (74.9 mg, 0.25 mmol), DCE (0.625 mL, ynamide *concn* = 0.40 M), and TfOH (11.1  $\mu\text{L}$ , 0.125 mmol) at 30 °C.

The reaction vessel was capped and stirred at 30 °C for 3.0 h. After the reaction was judged to be complete by TLC, the reaction mixture was cooled to rt, filtered through a pad of silica gel, concentrated in vacuo, and purified by flash silica gel column chromatography [gradient eluent: 25:1~20:1 petroleum ether/EtOAc] to afford *N*-arylimine **3d** (118.8 mg, 0.24 mmol) in 95% yield.

**3d**:  $R_f = 0.37$  [10:1 petroleum ether/EtOAc]; yellow oil;  $^1\text{H NMR}$  (400 MHz,  $\text{CDCl}_3$ )  $\delta$  7.83-7.80 (m, 2H), 7.42-7.39 (m, 2H), 7.33-7.25 (m, 5H), 7.05 (d, 1H,  $J = 2.7$  Hz), 6.70 (dd, 1H,  $J = 8.7, 2.8$  Hz), 6.10 (d, 1H,  $J = 8.6$  Hz), 4.88 (s, 2H), 3.72 (s, 3H), 2.49 (q, 2H,  $J = 7.5$  Hz), 2.43 (s, 3H), 0.86 (t, 3H,  $J = 7.5$  Hz);  $^{13}\text{C NMR}$  (100 MHz,  $\text{CDCl}_3$ )  $\delta$  162.2, 156.1, 144.3, 140.4, 137.0, 136.4, 129.9, 129.1, 128.3, 127.8, 127.6, 121.1, 117.8, 114.4, 114.3, 55.8, 51.3, 26.2, 21.7, 11.3; IR (neat) ( $\text{cm}^{-1}$ ) 2937w, 1643m, 1485m, 1350s, 1217w, 1162s, 1090m; HRMS (ESI):  $m/z$  calcd for  $\text{C}_{24}\text{H}_{25}\text{BrN}_2\text{O}_3\text{S}$   $[\text{M}+\text{H}]^+$ : 501.0842; found 501.0840.

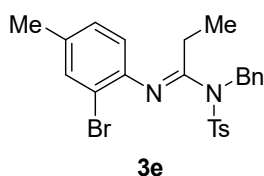

To an oven-dried sealed tube was added aniline **1e** (55.8 mg, 0.30 mmol), ynamide **2a** (74.9 mg, 0.25 mmol), DCE (0.625 mL, ynamide *concn* = 0.40 M), and TfOH (11.1  $\mu\text{L}$ , 0.125 mmol) at 30 °C. The reaction vessel was capped and stirred at 30 °C for 12.2 h. After the reaction was judged to be complete by TLC, the reaction mixture was cooled to rt, filtered through a pad of silica gel, concentrated in vacuo, and purified by flash silica gel column chromatography [gradient eluent: 35:1~20:1 petroleum ether/EtOAc] to afford *N*-arylimine **3e** (113.4 mg, 0.23 mmol) in 93% yield.

**3e**:  $R_f = 0.35$  [10:1 petroleum ether/EtOAc]; colorless oil;  $^1\text{H NMR}$  (400 MHz,  $\text{CDCl}_3$ )  $\delta$  7.83-7.80 (m, 2H), 7.42-7.40 (m, 2H), 7.33-7.24 (m, 6H), 6.93-6.90 (m, 1H), 6.06 (d, 1H,  $J = 8.0$  Hz), 4.88 (s, 2H), 2.48 (q, 2H,  $J = 7.5$  Hz), 2.44 (s, 3H), 2.25 (s, 3H), 0.87 (t, 3H,  $J = 7.5$  Hz);  $^{13}\text{C NMR}$  (100 MHz,  $\text{CDCl}_3$ )  $\delta$  161.7, 144.5, 144.3, 137.0, 136.4, 134.4, 133.2, 129.9, 129.1, 128.8, 128.3, 127.9, 127.6, 120.5, 113.8, 51.3, 26.3, 21.8, 20.5, 11.4; IR (neat) ( $\text{cm}^{-1}$ ) 3033w, 2920w, 1644m, 1455w, 1350s, 1163s, 1090m; HRMS (ESI):  $m/z$  calcd for  $\text{C}_{24}\text{H}_{25}\text{BrN}_2\text{O}_2\text{S}$   $[\text{M}+\text{H}]^+$ : 485.0893; found 485.0892.

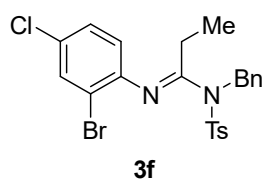

To an oven-dried sealed tube was added aniline **1f** (61.9 mg, 0.30 mmol), ynamide **2a** (74.9 mg, 0.25 mmol), DCE (0.625 mL, ynamide *concn* = 0.40 M), and TfOH (11.1  $\mu\text{L}$ , 0.125 mmol) at 30 °C.

The reaction vessel was capped and stirred at 30 °C for 17.2 h. After the reaction was judged to be complete by TLC, the reaction mixture was cooled to rt, filtered through a pad of silica gel, concentrated in vacuo, and purified by flash silica gel column chromatography [gradient eluent: 25:1~20:1 petroleum ether/EtOAc] to afford *N*-arylimine **3f** (117.9 mg, 0.23 mmol) in 93% yield.

**3f**:  $R_f$  = 0.51 [10:1 petroleum ether/EtOAc]; white solid; mp = 110–111 °C;  $^1\text{H}$  NMR (400 MHz,  $\text{CDCl}_3$ )  $\delta$  7.81-7.78 (m, 2H), 7.47 (d, 1H,  $J$  = 2.3 Hz), 7.40-7.37 (m, 2H), 7.34-7.24 (m, 5H), 7.08 (dd, 1H,  $J$  = 8.4, 2.3 Hz), 6.07 (d, 1H,  $J$  = 8.4 Hz), 4.90 (s, 2H), 2.49-2.43 (m, 5H), 0.88 (t, 3H,  $J$  = 7.5 Hz);  $^{13}\text{C}$  NMR (100 MHz,  $\text{CDCl}_3$ )  $\delta$  161.7, 145.7, 144.4, 136.8, 136.4, 132.4, 129.9, 128.9, 128.8, 128.3, 128.2, 127.8, 127.6, 121.4, 114.5, 51.3, 26.2, 21.7, 11.4; IR (neat) ( $\text{cm}^{-1}$ ) 2933w, 1649w, 1462s, 1351m, 1225s, 1167s, 1090m; HRMS (ESI):  $m/z$  calcd for  $\text{C}_{23}\text{H}_{22}\text{BrClN}_2\text{O}_2\text{S}$   $[\text{M}+\text{H}]^+$ : 505.0347; found 505.0345.

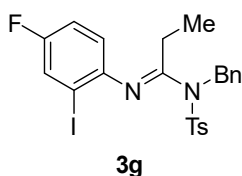

To an oven-dried sealed tube was added aniline **1g** (71.1 mg, 0.30 mmol), ynamide **2a** (74.9 mg, 0.25 mmol), DCE (0.625 mL, ynamide *concn* = 0.40 M), and TfOH (11.1  $\mu\text{L}$ , 0.125 mmol) at 30 °C. The reaction vessel was capped and stirred at 30 °C for 3.0 h. After the reaction was judged to be complete by TLC, the reaction mixture was cooled to rt, filtered through a pad of silica gel, concentrated in vacuo, and purified by flash silica gel column chromatography [gradient eluent: 30:1~25:1 petroleum ether/EtOAc] to afford *N*-arylimine **3g** (131.2 mg, 0.24 mmol) in 98% yield.

**3g**:  $R_f$  = 0.49 [10:1 petroleum ether/EtOAc]; colorless oil;  $^1\text{H}$  NMR (400 MHz,  $\text{CDCl}_3$ )  $\delta$  7.83 (d, 2H,  $J$  = 8.1 Hz), 7.45 (dd, 1H,  $J$  = 7.9, 2.8 Hz), 7.41-7.39 (m, 2H), 7.32-7.23 (m, 5H), 6.90-6.86 (m, 1H), 6.04 (dd, 1H,  $J$  = 8.8, 5.3 Hz), 4.96 (s, 2H), 2.49-2.42 (m, 5H), 0.91 (t, 3H,  $J$  = 7.5 Hz);  $^{13}\text{C}$  NMR (100 MHz,  $\text{CDCl}_3$ )  $\delta$  161.6, 158.3 (d,  $J$  = 244.8 Hz), 146.5 (d,  $J$  = 2.9 Hz), 144.3, 137.0, 136.7, 129.9, 128.8, 128.3, 127.9, 127.6, 125.5 (d,  $J$  = 24.3 Hz), 119.8 (d,  $J$  = 7.8 Hz), 116.0 (d,  $J$  = 21.9 Hz), 89.2 (d,  $J$  = 8.4 Hz), 51.2, 25.8, 21.7, 11.5; IR (neat) ( $\text{cm}^{-1}$ ) 3032w, 2937w, 1642s, 1472s, 1350m, 1253m, 1162s, 1089m; HRMS (ESI):  $m/z$  calcd for  $\text{C}_{23}\text{H}_{22}\text{FIN}_2\text{O}_2\text{S}$   $[\text{M}+\text{H}]^+$ : 537.0503; found 537.0493.

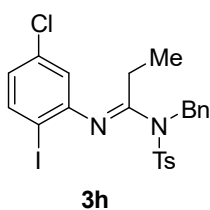

To an oven-dried sealed tube was added aniline **1h** (76.0 mg, 0.30 mmol), ynamide **2a** (74.9 mg, 0.25 mmol), DCE (0.625 mL, ynamide *concn* = 0.40 M), and TfOH (11.1  $\mu$ L, 0.125 mmol) at 30 °C. The reaction vessel was capped and stirred at 30 °C for 3.0 h. After the reaction was judged to be complete by TLC, the reaction mixture was cooled to rt, filtered through a pad of silica gel, concentrated in vacuo, and purified by flash silica gel column chromatography [gradient eluent: 30:1~25:1 petroleum ether/EtOAc] to afford *N*-arylimine **3h** (134.7 mg, 0.24 mmol) in 97% yield.

**3h**:  $R_f$  = 0.34 [10:1 petroleum ether/EtOAc]; colorless oil;  $^1\text{H NMR}$  (400 MHz,  $\text{CDCl}_3$ )  $\delta$  7.83-7.80 (m, 2H), 7.63 (d, 1H,  $J$  = 8.4 Hz), 7.41-7.39 (m, 2H), 7.34-7.28 (m, 5H), 6.70 (dd, 1H,  $J$  = 8.4, 2.4 Hz), 6.09 (d, 1H,  $J$  = 2.4 Hz), 4.97 (s, 2H), 2.49-2.43 (m, 5H), 0.94 (t, 3H,  $J$  = 7.5 Hz);  $^{13}\text{C NMR}$  (100 MHz,  $\text{CDCl}_3$ )  $\delta$  161.3, 151.2, 144.5, 139.9, 136.9, 136.7, 134.9, 130.0, 128.8, 128.5, 128.0, 127.7, 124.8, 119.7, 87.5, 51.3, 26.1, 21.8, 11.6; IR (neat) ( $\text{cm}^{-1}$ ) 2924w, 1642s, 1547w, 1454m, 1350s, 1227w, 1163s, 1087m; HRMS (ESI):  $m/z$  calcd for  $\text{C}_{23}\text{H}_{22}\text{ClIN}_2\text{O}_2\text{S}$   $[\text{M}+\text{H}]^+$ : 553.0208; found 553.0206.

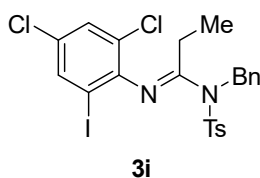

To an oven-dried sealed tube was added aniline **1i** (86.4 mg, 0.30 mmol), ynamide **2a** (74.9 mg, 0.25 mmol), DCE (0.625 mL, ynamide *concn* = 0.40 M), and TfOH (11.1  $\mu$ L, 0.125 mmol) at 30 °C. The reaction vessel was capped and stirred at 30 °C for 3.0 h. After the reaction was judged to be complete by TLC, the reaction mixture was cooled to rt, filtered through a pad of silica gel, concentrated in vacuo, and purified by flash silica gel column chromatography [gradient eluent: 40:1~30:1 petroleum ether/EtOAc] to afford *N*-arylimine **3i** (140.8 mg, 0.24 mmol) in 96% yield.

**3i**:  $R_f$  = 0.33 [10:1 petroleum ether/EtOAc]; white solid; mp = 84–85 °C;  $^1\text{H NMR}$  (400 MHz,  $\text{CDCl}_3$ )  $\delta$  7.76-7.73 (m, 2H), 7.62 (d, 1H,  $J$  = 2.2 Hz), 7.47-7.44 (m, 2H), 7.31-7.20 (m, 6H), 5.17 (s, 2H), 2.47-2.41 (m, 5H), 1.06 (t, 3H,  $J$  = 7.4 Hz);  $^{13}\text{C NMR}$  (100 MHz,  $\text{CDCl}_3$ )  $\delta$  162.8, 146.2, 144.6, 137.4, 137.1, 137.0, 129.9, 129.7, 128.7, 128.4, 128.2, 127.8, 127.5, 123.6, 90.8, 51.2, 26.5, 21.7, 11.3; IR (neat) ( $\text{cm}^{-1}$ ) 2920w, 1624s, 1527w, 1419m, 1354s, 1242m, 1171s; HRMS (ESI):  $m/z$  calcd for  $\text{C}_{23}\text{H}_{21}\text{Cl}_2\text{IN}_2\text{O}_2\text{S}$   $[\text{M}+\text{H}]^+$ : 586.9818; found 586.9817.

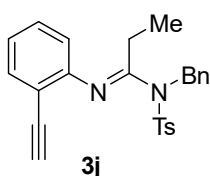

To an oven-dried sealed tube was added aniline **1j** (35.2 mg, 0.30 mmol), ynamide **2a** (74.9 mg,



0.25 mmol), DCE (0.625 mL, ynamide *concn* = 0.40 M), and TfOH (11.1  $\mu$ L, 0.125 mmol) at 30 °C. The reaction vessel was capped and stirred at 30 °C for 10.0 h. After the reaction was judged to be complete by TLC, the reaction mixture was cooled to rt, filtered through a pad of silica gel, concentrated in vacuo, and purified by flash silica gel column chromatography [gradient eluent: 30:1~20:1 petroleum ether/EtOAc] to afford *N*-arylimine **3j** (96.7 mg, 0.23 mmol) in 93% yield.

**3j**:  $R_f$  = 0.34 [10:1 petroleum ether/EtOAc]; colorless oil;  $^1\text{H}$  NMR (400 MHz,  $\text{CDCl}_3$ )  $\delta$  7.82 (d, 2H,  $J$  = 8.3 Hz), 7.44-7.39(m, 3H), 7.33-7.24 (m, 5H), 7.19-7.14 (m, 1H), 6.96-6.92 (m, 1H), 6.21 (d, 1H,  $J$  = 8.0 Hz), 4.87 (s, 2H), 2.85 (s, 1H), 2.54 (q, 2H,  $J$  = 7.5 Hz), 2.43 (s, 3H), 0.88 (t, 3H,  $J$  = 7.4 Hz);  $^{13}\text{C}$  NMR (100 MHz,  $\text{CDCl}_3$ )  $\delta$  160.8, 150.7, 144.2, 137.1, 136.7, 133.4, 129.9, 129.7, 129.1, 128.3, 127.9, 127.6, 123.1, 119.8, 112.3, 81.3, 81.0, 51.2, 26.3, 21.8, 11.5; IR (neat) ( $\text{cm}^{-1}$ ) 3315w, 2940w, 1643s, 1452m, 1349s, 1292m, 1167s, 1090m; HRMS (ESI):  $m/z$  calcd for  $\text{C}_{25}\text{H}_{24}\text{N}_2\text{O}_2\text{S}$   $[\text{M}+\text{H}]^+$ : 417.1631; found 417.1633.

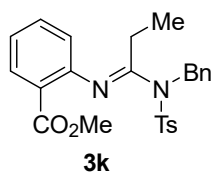

To an oven-dried sealed tube was added aniline **1k** (45.3 mg, 0.30 mmol), ynamide **2a** (74.9 mg, 0.25 mmol), DCE (0.625 mL, ynamide *concn* = 0.40 M), and TfOH (11.1  $\mu$ L, 0.125 mmol) at 30 °C. The reaction vessel was capped and stirred at 30 °C for 12.5 h. After the reaction was judged to be complete by TLC, the reaction mixture was cooled to rt, filtered through a pad of silica gel, concentrated in vacuo, and purified by flash silica gel column chromatography [gradient eluent: 30:1~20:1 petroleum ether/EtOAc] to afford *N*-arylimine **3k** (98.0 mg, 0.22 mmol) in 87% yield.

**3k**:  $R_f$  = 0.30 [10:1 petroleum ether/EtOAc]; colorless oil;  $^1\text{H}$  NMR (400 MHz,  $\text{CDCl}_3$ )  $\delta$  7.92-7.89 (m, 2H), 7.86 (dd, 1H,  $J$  = 8.0, 1.6 Hz), 7.43-7.40 (m, 2H), 7.35-7.26 (m, 6H), 7.04-7.00 (m, 1H), 6.05 (dd, 1H,  $J$  = 8.0, 1.2 Hz), 4.83 (s, 2H), 3.70 (s, 3H), 2.53 (q, 2H,  $J$  = 7.5 Hz), 2.44 (s, 3H), 0.89 (t, 3H,  $J$  = 7.5 Hz);  $^{13}\text{C}$  NMR (100 MHz,  $\text{CDCl}_3$ )  $\delta$  166.5, 159.1, 149.2, 144.1, 137.2, 136.8, 133.0, 131.1, 129.8, 129.0, 128.3, 128.0, 127.6, 122.9, 121.0, 120.0, 51.9, 51.2, 26.7, 21.8, 11.5; IR (neat) ( $\text{cm}^{-1}$ ) 2951w, 1655m, 1433w, 1349s, 1294m, 1161s; HRMS (ESI):  $m/z$  calcd for  $\text{C}_{25}\text{H}_{26}\text{N}_2\text{O}_4\text{S}$   $[\text{M}+\text{H}]^+$ : 451.1686; found 451.1685.

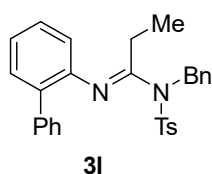

To an oven-dried sealed tube was added aniline **1l** (50.8 mg, 0.30 mmol), ynamide **2a** (74.9 mg,

0.25 mmol), DCE (0.625 mL, ynamide *concn* = 0.40 M), and TfOH (11.1  $\mu$ L, 0.125 mmol) at 30 °C. The reaction vessel was capped and stirred at 30 °C for 17.0 h. After the reaction was judged to be complete by TLC, the reaction mixture was cooled to rt, filtered through a pad of silica gel, concentrated in vacuo, and purified by flash silica gel column chromatography [gradient eluent: 30:1~25:1 petroleum ether/EtOAc] to afford *N*-arylimine **3l** (99.4 mg, 0.21 mmol) in 85% yield.

**3l**:  $R_f$  = 0.33 [10:1 petroleum ether/EtOAc]; white solid; mp = 72–73 °C;  $^1\text{H}$  NMR (400 MHz,  $\text{CDCl}_3$ )  $\delta$  7.50-7.46 (m, 2H), 7.29-7.15 (m, 14H), 7.09-7.05 (m, 1H), 6.24 (d, 1H,  $J$  = 7.7 Hz), 4.76 (s, 2H), 2.42 (s, 3H), 2.33 (q, 2H,  $J$  = 7.5 Hz), 0.78 (t, 3H,  $J$  = 7.5 Hz);  $^{13}\text{C}$  NMR (100 MHz,  $\text{CDCl}_3$ )  $\delta$  159.0, 146.1, 143.7, 139.9, 137.2, 137.1, 132.2, 130.6, 129.6, 129.3, 128.5, 128.4, 128.2, 128.1, 127.8, 127.5, 126.8, 123.7, 120.0, 50.8, 25.7, 21.8, 11.4; IR (neat) ( $\text{cm}^{-1}$ ) 2920w, 1663s, 1453m, 1341s, 1207m, 1165s, 1087m; HRMS (ESI):  $m/z$  calcd for  $\text{C}_{29}\text{H}_{28}\text{N}_2\text{O}_2\text{S}$   $[\text{M}+\text{H}]^+$ : 469.1944; found 469.1943.

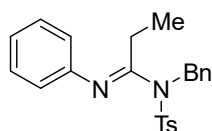

**3m**

To an oven-dried sealed tube was added aniline **1m** (27.9 mg, 0.30 mmol), ynamide **2a** (74.9 mg, 0.25 mmol), DCE (0.625 mL, ynamide *concn* = 0.40 M), and TfOH (11.1  $\mu$ L, 0.125 mmol) at 30 °C. The reaction vessel was capped and stirred at 30 °C for 8.3 h. After the reaction was judged to be complete by TLC, the reaction mixture was cooled to rt, filtered through a pad of silica gel, concentrated in vacuo, and purified by flash silica gel column chromatography [gradient eluent: 30:1~20:1 petroleum ether/EtOAc] to afford *N*-arylimine **3m** (72.4 mg, 0.18 mmol) in 74% yield.

**3m**:  $R_f$  = 0.48 [10:1 petroleum ether/EtOAc]; white solid; mp = 63–64 °C;  $^1\text{H}$  NMR (400 MHz,  $\text{CDCl}_3$ )  $\delta$  7.77 (d, 2H,  $J$  = 8.3 Hz), 7.39-7.25 (m, 7H), 7.21 (t, 2H,  $J$  = 7.8 Hz), 7.02-6.97 (m, 1H), 6.33 (d, 2H,  $J$  = 7.5 Hz), 4.75 (s, 2H), 2.52-2.46 (m, 5H), 0.74 (t, 3H,  $J$  = 7.5 Hz);  $^{13}\text{C}$  NMR (100 MHz,  $\text{CDCl}_3$ )  $\delta$  160.5, 148.5, 144.3, 136.7, 135.7, 129.9, 129.6, 129.1, 128.3, 127.85, 127.76, 123.4, 119.1, 51.5, 26.0, 21.8, 11.4; IR (neat) ( $\text{cm}^{-1}$ ) 2941w, 1649s, 1456m, 1339s, 1227m, 1159s, 1016m; HRMS (ESI):  $m/z$  calcd for  $\text{C}_{23}\text{H}_{24}\text{N}_2\text{O}_2\text{S}$   $[\text{M}+\text{H}]^+$ : 393.1631; found 393.1633.

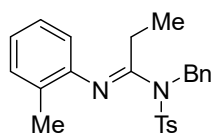

**3n**

To an oven-dried sealed tube was added aniline **1n** (32.1 mg, 0.30 mmol), ynamide **2a** (74.9 mg, 0.25 mmol), DCE (0.625 mL, ynamide *concn* = 0.40 M), and TfOH (11.1  $\mu$ L, 0.125 mmol) at 30 °C.

The reaction vessel was capped and stirred at 30 °C for 12.5 h. After the reaction was judged to be complete by TLC, the reaction mixture was cooled to rt, filtered through a pad of silica gel, concentrated in vacuo, and purified by flash silica gel column chromatography [gradient eluent: 30:1~25:1 petroleum ether/EtOAc] to afford *N*-arylimine **3n** (75.5 mg, 0.19 mmol) in 74% yield.

**3n**:  $R_f = 0.47$  [10:1 petroleum ether/EtOAc]; white solid; mp = 53–54 °C;  $^1\text{H}$  NMR (400 MHz,  $\text{CDCl}_3$ )  $\delta$  7.79 (d, 2H,  $J = 8.3$  Hz), 7.38-7.23 (m, 7H), 7.06 (d, 1H,  $J = 7.4$  Hz), 7.03-6.99 (m, 1H), 6.92-6.88 (m, 1H), 6.09 (d, 1H,  $J = 7.6$  Hz), 4.89 (s, 2H), 2.46-2.40 (m, 5H), 1.69 (s, 3H), 0.84 (t, 3H,  $J = 7.5$  Hz);  $^{13}\text{C}$  NMR (100 MHz,  $\text{CDCl}_3$ )  $\delta$  159.6, 147.2, 144.2, 137.0, 136.3, 130.4, 129.8, 128.9, 128.3, 127.7, 127.6, 127.1, 126.4, 123.4, 118.6, 51.2, 25.8, 21.7, 17.7, 11.2; IR (neat) ( $\text{cm}^{-1}$ ) 2933w, 1647m, 1454w, 1348s, 1231m, 1166s; HRMS (ESI):  $m/z$  calcd for  $\text{C}_{24}\text{H}_{26}\text{N}_2\text{O}_2\text{S}$   $[\text{M}+\text{H}]^+$ : 407.1788; found 407.1788.

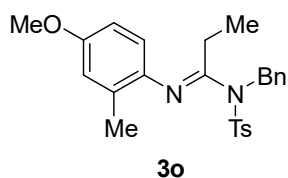

To an oven-dried sealed tube was added aniline **1o** (41.2 mg, 0.30 mmol), ynamide **2a** (74.9 mg, 0.25 mmol), DCE (0.625 mL, ynamide *concn* = 0.40 M), and TfOH (11.1  $\mu\text{L}$ , 0.125 mmol) at 30 °C. The reaction vessel was capped and stirred at 30 °C for 3.0 h. After the reaction was judged to be complete by TLC, the reaction mixture was cooled to rt, filtered through a pad of silica gel, concentrated in vacuo, and purified by flash silica gel column chromatography [gradient eluent: 30:1~20:1 petroleum ether/EtOAc] to afford *N*-arylimine **3o** (78.5 mg, 0.18 mmol) in 72% yield.

**3o**:  $R_f = 0.33$  [10:1 petroleum ether/EtOAc]; yellow oil;  $^1\text{H}$  NMR (400 MHz,  $\text{CDCl}_3$ )  $\delta$  7.80-7.77 (m, 2H), 7.38-7.23 (m, 7H), 6.64 (d, 1H,  $J = 2.9$  Hz), 6.58 (dd, 1H,  $J = 8.5, 2.8$  Hz), 6.03 (d, 1H,  $J = 8.5$  Hz), 4.87 (s, 2H), 3.72 (s, 3H), 2.47-2.41 (m, 5H), 1.68 (s, 3H), 0.82 (t, 3H,  $J = 7.5$  Hz);  $^{13}\text{C}$  NMR (100 MHz,  $\text{CDCl}_3$ )  $\delta$  160.4, 156.0, 144.2, 140.6, 137.1, 136.3, 129.8, 128.9, 128.6, 128.3, 127.7, 127.6, 119.4, 116.0, 111.5, 55.5, 51.3, 25.8, 21.8, 18.1, 11.2; IR (neat) ( $\text{cm}^{-1}$ ) 2939w, 1643m, 1493s, 1348s, 1304w, 1219m, 1150s, 1089m; HRMS (ESI):  $m/z$  calcd for  $\text{C}_{25}\text{H}_{28}\text{N}_2\text{O}_3\text{S}$   $[\text{M}+\text{H}]^+$ : 437.1893; found 437.1894.

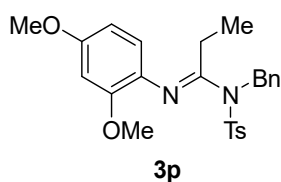

To an oven-dried sealed tube was added aniline **1p** (46.0 mg, 0.30 mmol), ynamide **2a** (74.9 mg, 0.25 mmol), DCE (0.625 mL, ynamide *concn* = 0.40 M), and TfOH (11.1  $\mu\text{L}$ , 0.125 mmol) at 30 °C.

The reaction vessel was capped and stirred at 30 °C for 12.5 h. After the reaction was judged to be complete by TLC, the reaction mixture was cooled to rt, filtered through a pad of silica gel, concentrated in vacuo, and purified by flash silica gel column chromatography [gradient eluent: 30:1~20:1 petroleum ether/EtOAc] to afford *N*-arylimine **3p** (70.9 mg, 0.16 mmol) in 63% yield.

**3p**:  $R_f = 0.18$  [10:1 petroleum ether/EtOAc]; yellow solid; mp = 74–75 °C;  $^1\text{H}$  NMR (400 MHz,  $\text{CDCl}_3$ )  $\delta$  7.83–7.80 (m, 2H), 7.43–7.41 (m, 2H), 7.33–7.25 (m, 5H), 6.44 (d, 1H,  $J = 2.5$  Hz), 6.35 (dd, 1H,  $J = 8.5, 2.6$  Hz), 6.17 (d, 1H,  $J = 8.4$  Hz), 4.72 (s, 2H), 3.75 (s, 3H), 3.70 (s, 3H), 2.47 (q, 2H,  $J = 7.5$  Hz), 2.43 (s, 3H), 0.72 (t, 3H,  $J = 7.5$  Hz);  $^{13}\text{C}$  NMR (100 MHz,  $\text{CDCl}_3$ )  $\delta$  162.6, 157.1, 149.5, 144.0, 136.8, 135.7, 131.0, 129.7, 128.1, 128.0, 127.6, 120.6, 104.2, 99.5, 55.6, 55.4, 51.3, 26.8, 21.7, 10.9, one carbon missing due to overlap, overlapped signal at 129.7 ppm; IR (neat) ( $\text{cm}^{-1}$ ) 2920w, 1647m, 1498m, 1344s, 1259w, 1205s, 1153s; HRMS (ESI):  $m/z$  calcd for  $\text{C}_{25}\text{H}_{28}\text{N}_2\text{O}_4\text{S}$   $[\text{M}+\text{H}]^+$ : 453.1843; found 453.1841.

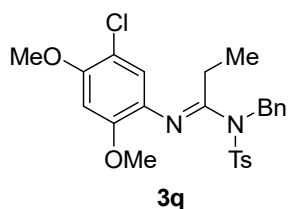

To an oven-dried sealed tube was added aniline **1q** (56.3 mg, 0.30 mmol), ynamide **2a** (74.9 mg, 0.25 mmol), DCE (0.625 mL, ynamide *concn* = 0.40 M), and TfOH (11.1  $\mu\text{L}$ , 0.125 mmol) at 30 °C. The reaction vessel was capped and stirred at 30 °C for 4.0 h. After the reaction was judged to be complete by TLC, the reaction mixture was cooled to rt, filtered through a pad of silica gel, concentrated in vacuo, and purified by flash silica gel column chromatography [gradient eluent: 20:1~10:1 petroleum ether/EtOAc] to afford *N*-arylimine **3q** (86.1 mg, 0.18 mmol) in 71% yield.

**3q**:  $R_f = 0.37$  [4:1 petroleum ether/EtOAc]; white solid; mp = 83–84 °C;  $^1\text{H}$  NMR (400 MHz,  $\text{CDCl}_3$ )  $\delta$  7.81–7.77 (m, 2H), 7.41–7.38 (m, 2H), 7.35–7.27 (m, 5H), 6.48 (s, 1H), 6.26 (s, 1H), 4.74 (s, 2H), 3.87 (s, 3H), 3.69 (s, 3H), 2.48–2.43 (m, 5H), 0.76 (t, 3H,  $J = 7.5$  Hz);  $^{13}\text{C}$  NMR (100 MHz,  $\text{CDCl}_3$ )  $\delta$  163.1, 151.8, 148.0, 144.2, 136.7, 135.8, 131.3, 129.8, 129.5, 128.2, 127.9, 127.7, 121.8, 113.8, 98.0, 56.9, 55.9, 51.3, 26.7, 21.8, 11.0; IR (neat) ( $\text{cm}^{-1}$ ) 2924w, 1637m, 1498m, 1348s, 1279w, 1164s, 1032s; HRMS (ESI):  $m/z$  calcd for  $\text{C}_{25}\text{H}_{27}\text{ClN}_2\text{O}_4\text{S}$   $[\text{M}+\text{H}]^+$ : 487.1453; found 487.1452.

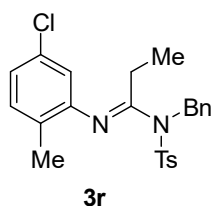

To an oven-dried sealed tube was added aniline **1r** (42.5 mg, 0.30 mmol), ynamide **2a** (74.9 mg, 0.25 mmol), DCE (0.625 mL, ynamide *concn* = 0.40 M), and TfOH (11.1  $\mu$ L, 0.125 mmol) at 30 °C. The reaction vessel was capped and stirred at 30 °C for 12.8 h. After the reaction was judged to be complete by TLC, the reaction mixture was cooled to rt, filtered through a pad of silica gel, concentrated in vacuo, and purified by flash silica gel column chromatography [gradient eluent: 30:1~20:1 petroleum ether/EtOAc] to afford *N*-arylimine **3r** (99.3 mg, 0.23 mmol) in 90% yield.

**3r**:  $R_f$  = 0.49 [10:1 petroleum ether/EtOAc]; colorless oil;  $^1\text{H}$  NMR (400 MHz,  $\text{CDCl}_3$ )  $\delta$  7.78-7.75 (m, 2H), 7.37-7.24 (m, 7H), 6.97 (d, 1H,  $J$  = 8.1 Hz), 6.86 (dd, 1H,  $J$  = 8.0, 2.2 Hz), 6.07 (d, 1H,  $J$  = 2.2 Hz), 4.90 (s, 2H), 2.45-2.39 (m, 5H), 1.62 (s, 3H), 0.86 (t, 3H,  $J$  = 7.5 Hz);  $^{13}\text{C}$  NMR (100 MHz,  $\text{CDCl}_3$ )  $\delta$  160.1, 148.2, 144.4, 136.9, 136.4, 131.6, 131.5, 129.9, 128.7, 128.5, 127.8, 127.7, 125.9, 123.3, 118.7, 51.2, 25.8, 21.8, 17.2, 11.3; IR (neat) ( $\text{cm}^{-1}$ ) 2920w, 1637m, 1481m, 1348s, 1227w, 1162s, 1089m; HRMS (ESI):  $m/z$  calcd for  $\text{C}_{24}\text{H}_{25}\text{ClN}_2\text{O}_2\text{S}$   $[\text{M}+\text{H}]^+$ : 441.1398; found 441.1400.

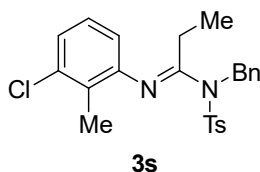

To an oven-dried sealed tube was added aniline **1s** (42.5 mg, 0.30 mmol), ynamide **2a** (74.9 mg, 0.25 mmol), DCE (0.625 mL, ynamide *concn* = 0.40 M), and TfOH (11.1  $\mu$ L, 0.125 mmol) at 30 °C. The reaction vessel was capped and stirred at 30 °C for 3.0 h. After the reaction was judged to be complete by TLC, the reaction mixture was cooled to rt, filtered through a pad of silica gel, concentrated in vacuo, and purified by flash silica gel column chromatography [gradient eluent: 25:1~20:1 petroleum ether/EtOAc] to afford *N*-arylimine **3s** (98.1 mg, 0.22 mmol) in 89% yield.

**3s**:  $R_f$  = 0.47 [10:1 petroleum ether/EtOAc]; white solid; mp = 146–147 °C;  $^1\text{H}$  NMR (400 MHz,  $\text{CDCl}_3$ )  $\delta$  7.79-7.76 (m, 2H), 7.37-7.24 (m, 7H), 7.00 (dd, 1H,  $J$  = 8.1, 1.4 Hz), 6.92 (t, 1H,  $J$  = 7.8 Hz), 5.97 (d, 1H,  $J$  = 7.6 Hz), 4.91 (s, 2H), 2.45 (s, 3H), 2.41 (q, 2H,  $J$  = 7.5 Hz), 1.70 (s, 3H), 0.86 (t, 3H,  $J$  = 7.5 Hz);  $^{13}\text{C}$  NMR (100 MHz,  $\text{CDCl}_3$ )  $\delta$  160.0, 148.5, 144.4, 136.9, 136.4, 135.2, 129.9, 128.7, 128.4, 127.7, 126.9, 125.6, 124.1, 117.3, 51.3, 25.8, 21.8, 14.5, 11.3, one carbon missing due to overlap, overlapped signal at 127.7 ppm; IR (neat) ( $\text{cm}^{-1}$ ) 2935w, 1646m, 1455w, 1350s, 1205w, 1162s, 1099m; HRMS (ESI):  $m/z$  calcd for  $\text{C}_{24}\text{H}_{25}\text{ClN}_2\text{O}_2\text{S}$   $[\text{M}+\text{H}]^+$ : 441.1398; found 441.1401.

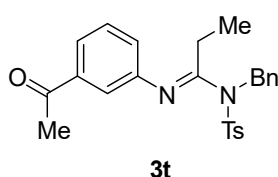

To an oven-dried sealed tube was added aniline **1t** (40.6 mg, 0.30 mmol), ynamide **2a** (74.9 mg,

0.25 mmol), DCE (0.625 mL, ynamide *concn* = 0.40 M), and TfOH (11.1  $\mu$ L, 0.125 mmol) at 30 °C. The reaction vessel was capped and stirred at 30 °C for 12.5 h. After the reaction was judged to be complete by TLC, the reaction mixture was cooled to rt, filtered through a pad of silica gel, concentrated in vacuo, and purified by flash silica gel column chromatography [gradient eluent: 18:1~10:1 petroleum ether/EtOAc] to afford *N*-arylimine **3t** (74.1 mg, 0.17 mmol) in 68% yield.

**3t**:  $R_f$  = 0.44 [4:1 petroleum ether/EtOAc]; white solid; mp = 80–81 °C;  $^1\text{H}$  NMR (400 MHz,  $\text{CDCl}_3$ )  $\delta$  7.79-7.75 (m, 2H), 7.60-7.57 (m, 1H), 7.39-7.27 (m, 8H), 6.88 (t, 1H,  $J$  = 2.0 Hz), 6.51 (d, 1H,  $J$  = 7.7 Hz), 4.80 (s, 2H), 2.52 (s, 3H), 2.49-2.43 (m, 5H), 0.77 (t, 3H,  $J$  = 7.5 Hz);  $^{13}\text{C}$  NMR (100 MHz,  $\text{CDCl}_3$ )  $\delta$  197.9, 160.7, 148.8, 144.4, 138.0, 136.6, 135.7, 129.9, 129.4, 129.3, 128.3, 127.8, 124.0, 123.4, 118.8, 51.4, 26.8, 25.8, 21.8, 11.4, one carbon missing due to overlap, overlapped signal at 127.8 ppm; IR (neat) ( $\text{cm}^{-1}$ ) 2924w, 1679s, 1454w, 1344s, 1265m, 1162s, 1090m, 1014m; HRMS (ESI):  $m/z$  calcd for  $\text{C}_{25}\text{H}_{26}\text{N}_2\text{O}_3\text{S}$   $[\text{M}+\text{H}]^+$ : 435.1737; found 435.1734.

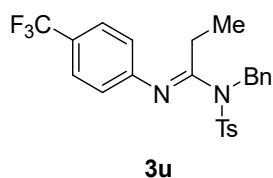

To an oven-dried sealed tube was added aniline **1u** (48.3 mg, 0.30 mmol), ynamide **2a** (74.9 mg, 0.25 mmol), DCE (0.625 mL, ynamide *concn* = 0.40 M), and TfOH (11.1  $\mu$ L, 0.125 mmol) at 30 °C. The reaction vessel was capped and stirred at 30 °C for 3.0 h. After the reaction was judged to be complete by TLC, the reaction mixture was cooled to rt, filtered through a pad of silica gel, concentrated in vacuo, and purified by flash silica gel column chromatography [gradient eluent: 30:1~20:1 petroleum ether/EtOAc] to afford *N*-arylimine **3u** (69.8 mg, 0.15 mmol) in 61% yield.

**3u**:  $R_f$  = 0.43 [10:1 petroleum ether/EtOAc]; colorless oil;  $^1\text{H}$  NMR (400 MHz,  $\text{CDCl}_3$ )  $\delta$  7.77 (d, 2H,  $J$  = 8.4 Hz), 7.45 (d, 2H,  $J$  = 8.2 Hz), 7.38-7.28 (m, 7H), 6.38 (d, 2H,  $J$  = 8.2 Hz), 4.80 (s, 2H), 2.50-2.45 (m, 5H), 0.79 (t, 3H,  $J$  = 7.5 Hz);  $^{13}\text{C}$  NMR (100 MHz,  $\text{CDCl}_3$ )  $\delta$  160.4, 151.5, 144.5, 136.6, 135.8, 129.9, 129.2, 128.4, 127.82, 127.76, 126.4 (q,  $J$  = 3.7 Hz), 125.4 (q,  $J$  = 32.3 Hz), 124.5 (q,  $J$  = 269.7 Hz), 119.4, 51.4, 25.9, 21.8, 11.5; IR (neat) ( $\text{cm}^{-1}$ ) 2943w, 1650m, 1455w, 1332s, 1162s, 1063m; HRMS (ESI):  $m/z$  calcd for  $\text{C}_{24}\text{H}_{23}\text{F}_3\text{N}_2\text{O}_2\text{S}$   $[\text{M}+\text{H}]^+$ : 461.1505; found 461.1496.

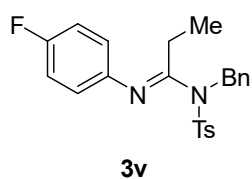

To an oven-dried sealed tube was added aniline **1v** (33.3 mg, 0.30 mmol), ynamide **2a** (74.9 mg, 0.25 mmol), DCE (0.625 mL, ynamide *concn* = 0.40 M), and TfOH (11.1  $\mu$ L, 0.125 mmol) at 30 °C.

The reaction vessel was capped and stirred at 30 °C for 3.0 h. After the reaction was judged to be complete by TLC, the reaction mixture was cooled to rt, filtered through a pad of silica gel, concentrated in vacuo, and purified by flash silica gel column chromatography [gradient eluent: 30:1~20:1 petroleum ether/EtOAc] to afford *N*-arylimine **3v** (69.6 mg, 0.17 mmol) in 68% yield.

**3v**:  $R_f = 0.41$  [10:1 petroleum ether/EtOAc]; white solid; mp = 82–83 °C;  $^1\text{H}$  NMR (400 MHz,  $\text{CDCl}_3$ )  $\delta$  7.77-7.74 (m, 2H), 7.37-7.35 (m, 4H), 7.33-7.27 (m, 3H), 6.92-6.88 (m, 2H), 6.29-6.26 (m, 2H), 4.75 (s, 2H), 2.49 (q, 2H,  $J = 7.5$  Hz), 2.45 (s, 3H), 0.74 (t, 3H,  $J = 7.6$  Hz);  $^{13}\text{C}$  NMR (100 MHz,  $\text{CDCl}_3$ )  $\delta$  161.1, 159.3 (d,  $J = 239.9$  Hz), 144.5 (d,  $J = 2.8$  Hz), 144.3, 136.6, 135.6, 129.8, 129.4, 128.3, 127.77, 127.75, 120.4 (d,  $J = 7.8$  Hz), 115.8 (d,  $J = 22.4$ ), 51.4, 25.8, 21.8, 11.3; IR (neat) ( $\text{cm}^{-1}$ ) 2922w, 1645s, 1598m, 1350s, 1278w, 1202s, 1163s, 1012m; HRMS (ESI):  $m/z$  calcd for  $\text{C}_{23}\text{H}_{23}\text{FN}_2\text{O}_2\text{S}$  [ $\text{M}+\text{H}$ ] $^+$ : 411.1537; found 411.1531.

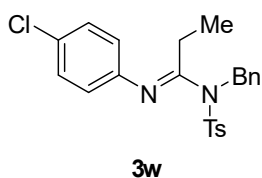

To an oven-dried sealed tube was added aniline **1w** (38.3 mg, 0.30 mmol), ynamide **2a** (74.9 mg, 0.25 mmol), DCE (0.625 mL, ynamide *concn* = 0.40 M), and TfOH (11.1  $\mu\text{L}$ , 0.125 mmol) at 30 °C. The reaction vessel was capped and stirred at 30 °C for 12.5 h. After the reaction was judged to be complete by TLC, the reaction mixture was cooled to rt, filtered through a pad of silica gel, concentrated in vacuo, and purified by flash silica gel column chromatography [gradient eluent: 35:1~30:1 petroleum ether/EtOAc] to afford *N*-arylimine **3w** (73.7 mg, 0.17 mmol) in 69% yield.

**3w**:  $R_f = 0.49$  [10:1 petroleum ether/EtOAc]; white solid; mp = 108–109 °C;  $^1\text{H}$  NMR (400 MHz,  $\text{CDCl}_3$ )  $\delta$  7.75 (d, 2H,  $J = 8.3$  Hz), 7.37-7.25 (m, 7H), 7.18-7.15 (m, 2H), 6.25 (d, 2H,  $J = 8.6$  Hz), 4.76 (s, 2H), 2.51-2.46 (m, 5H), 0.75 (t, 3H,  $J = 7.5$  Hz);  $^{13}\text{C}$  NMR (100 MHz,  $\text{CDCl}_3$ )  $\delta$  160.8, 147.0, 144.4, 136.6, 135.7, 129.9, 129.3, 129.1, 128.7, 128.3, 127.8, 120.6, 51.4, 25.8, 21.8, 11.4, one carbon missing due to overlap, overlapped signal at 127.8 ppm; IR (neat) ( $\text{cm}^{-1}$ ) 2922w, 1653m, 1482m, 1348s, 1225s, 1156s; HRMS (ESI):  $m/z$  calcd for  $\text{C}_{23}\text{H}_{23}\text{ClN}_2\text{O}_2\text{S}$  [ $\text{M}+\text{H}$ ] $^+$ : 427.1242; found 427.1243.

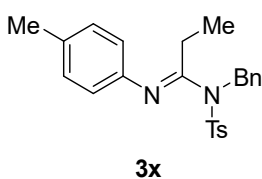

To an oven-dried sealed tube was added aniline **1x** (32.1 mg, 0.30 mmol), ynamide **2a** (74.9 mg, 0.25 mmol), DCE (0.625 mL, ynamide *concn* = 0.40 M), and TfOH (11.1  $\mu\text{L}$ , 0.125 mmol) at 30 °C.

The reaction vessel was capped and stirred at 30 °C for 12.0 h. After the reaction was judged to be complete by TLC, the reaction mixture was cooled to rt, filtered through a pad of silica gel, concentrated in vacuo, and purified by flash silica gel column chromatography [gradient eluent: 25:1~20:1 petroleum ether/EtOAc] to afford *N*-arylimine **3x** (63.7 mg, 0.16 mmol) in 63% yield.

**3x**:  $R_f = 0.45$  [10:1 petroleum ether/EtOAc]; white solid; mp = 85–86 °C;  $^1\text{H}$  NMR (400 MHz,  $\text{CDCl}_3$ )  $\delta$  7.78-7.75 (m, 2H), 7.38-7.24 (m, 7H), 7.01 (d, 2H,  $J = 8.0$  Hz), 6.26-6.23 (m, 2H), 4.74 (s, 2H), 2.50 (q, 2H,  $J = 7.5$  Hz), 2.44 (s, 3H), 2.26 (s, 3H), 0.72 (t, 3H,  $J = 7.5$  Hz);  $^{13}\text{C}$  NMR (100 MHz,  $\text{CDCl}_3$ )  $\delta$  160.5, 145.9, 144.2, 136.7, 135.6, 132.8, 129.8, 129.64, 129.57, 128.3, 127.8, 127.7, 119.0, 51.4, 25.9, 21.8, 20.9, 11.3; IR (neat) ( $\text{cm}^{-1}$ ) 2924w, 1655m, 1504m, 1345s, 1275s, 1163s, 1090m; HRMS (ESI):  $m/z$  calcd for  $\text{C}_{24}\text{H}_{26}\text{N}_2\text{O}_2\text{S}$   $[\text{M}+\text{H}]^+$ : 407.1788; found 407.1789.

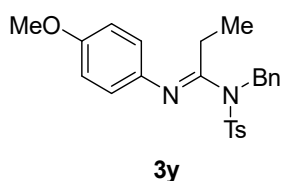

To an oven-dried sealed tube was added aniline **1y** (36.9 mg, 0.30 mmol), ynamide **2a** (74.9 mg, 0.25 mmol), DCE (0.625 mL, ynamide *concn* = 0.40 M), and TfOH (11.1  $\mu\text{L}$ , 0.125 mmol) at 30 °C. The reaction vessel was capped and stirred at 30 °C for 12.4 h. After the reaction was judged to be complete by TLC, the reaction mixture was cooled to rt, filtered through a pad of silica gel, concentrated in vacuo, and purified by flash silica gel column chromatography [gradient eluent: 30:1~20:1 petroleum ether/EtOAc] to afford *N*-arylimine **3y** (77.0 mg, 0.18 mmol) in 73% yield.

**3y**:  $R_f = 0.32$  [10:1 petroleum ether/EtOAc]; colorless oil;  $^1\text{H}$  NMR (400 MHz,  $\text{CDCl}_3$ )  $\delta$  7.76 (d, 2H,  $J = 8.3$  Hz), 7.38-7.25 (m, 7H), 6.79-6.75 (m, 2H), 6.31-6.28 (m, 2H), 4.73 (s, 2H), 3.75 (s, 3H), 2.51 (q, 2H,  $J = 7.5$  Hz), 2.45 (s, 3H), 0.72 (t, 3H,  $J = 7.5$  Hz);  $^{13}\text{C}$  NMR (100 MHz,  $\text{CDCl}_3$ )  $\delta$  161.0, 156.0, 144.2, 141.8, 136.7, 135.6, 129.8, 129.6, 128.3, 127.9, 127.7, 120.2, 114.4, 55.6, 51.5, 25.9, 21.8, 11.3; IR (neat) ( $\text{cm}^{-1}$ ) 2935w, 1648m, 1503s, 1455w, 1349s, 1240m, 1160s; HRMS (ESI):  $m/z$  calcd for  $\text{C}_{24}\text{H}_{26}\text{N}_2\text{O}_3\text{S}$   $[\text{M}+\text{H}]^+$ : 423.1737; found 423.1738.

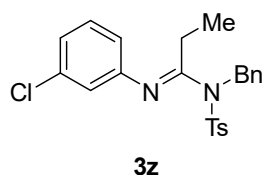

To an oven-dried sealed tube was added aniline **1z** (38.3 mg, 0.30 mmol), ynamide **2a** (74.9 mg, 0.25 mmol), DCE (0.625 mL, ynamide *concn* = 0.40 M), and TfOH (11.1  $\mu\text{L}$ , 0.125 mmol) at 30 °C. The reaction vessel was capped and stirred at 30 °C for 12.0 h. After the reaction was judged to be complete by TLC, the reaction mixture was cooled to rt, filtered through a pad of silica gel,



concentrated in vacuo, and purified by flash silica gel column chromatography [gradient eluent: 35:1~30:1 petroleum ether/EtOAc] to afford *N*-arylimine **3z** (79.2 mg, 0.19 mmol) in 74% yield.

**3z**:  $R_f = 0.43$  [10:1 petroleum ether/EtOAc]; white solid; mp = 106–107 °C;  $^1\text{H NMR}$  (400 MHz,  $\text{CDCl}_3$ )  $\delta$  7.75 (d, 2H,  $J = 8.4$  Hz), 7.37-7.24 (m, 7H), 7.11 (t, 1H,  $J = 7.9$  Hz), 6.97-6.94 (m, 1H), 6.32 (t, 1H,  $J = 2.0$  Hz), 6.19 (d, 1H,  $J = 7.8$  Hz), 4.78 (s, 2H), 2.51-2.45 (m, 5H), 0.78 (t, 3H,  $J = 7.5$  Hz);  $^{13}\text{C NMR}$  (100 MHz,  $\text{CDCl}_3$ )  $\delta$  160.8, 149.6, 144.4, 136.6, 135.8, 134.6, 130.2, 129.9, 129.2, 128.3, 127.8, 127.7, 123.4, 119.4, 117.5, 51.3, 25.9, 21.8, 11.5; IR (neat) ( $\text{cm}^{-1}$ ) 2937w, 1641m, 1587m, 1456w, 1344s, 1218w, 1162s, 1089m; HRMS (ESI):  $m/z$  calcd for  $\text{C}_{23}\text{H}_{23}\text{ClN}_2\text{O}_2\text{S}$   $[\text{M}+\text{H}]^+$ : 427.1242; found 427.1242.

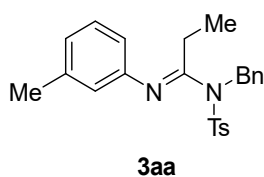

To an oven-dried sealed tube was added aniline **1aa** (32.1 mg, 0.30 mmol), ynamide **2a** (74.9 mg, 0.25 mmol), DCE (0.625 mL, ynamide *concn* = 0.40 M), and TfOH (11.1  $\mu\text{L}$ , 0.125 mmol) at 30 °C. The reaction vessel was capped and stirred at 30 °C for 12.4 h. After the reaction was judged to be complete by TLC, the reaction mixture was cooled to rt, filtered through a pad of silica gel, concentrated in vacuo, and purified by flash silica gel column chromatography [gradient eluent: 30:1~20:1 petroleum ether/EtOAc] to afford *N*-arylimine **3aa** (63.6 mg, 0.16 mmol) in 63% yield.

**3aa**:  $R_f = 0.47$  [10:1 petroleum ether/EtOAc]; white solid; mp = 79–80 °C;  $^1\text{H NMR}$  (400 MHz,  $\text{CDCl}_3$ )  $\delta$  7.78-7.75 (m, 2H), 7.39-7.26 (m, 7H), 7.09 (t, 1H,  $J = 7.7$  Hz), 6.82-6.79 (m, 1H), 6.17-6.12 (m, 2H), 4.74 (s, 2H), 2.49 (q, 2H,  $J = 7.5$  Hz), 2.45 (s, 3H), 2.26 (s, 3H), 0.74 (t, 3H,  $J = 7.5$  Hz);  $^{13}\text{C NMR}$  (100 MHz,  $\text{CDCl}_3$ )  $\delta$  160.2, 148.5, 144.2, 138.9, 136.7, 135.7, 129.8, 129.5, 128.9, 128.3, 127.8, 127.7, 124.2, 119.7, 116.1, 51.4, 26.0, 21.8, 21.6, 11.4; IR (neat) ( $\text{cm}^{-1}$ ) 2927w, 1648m, 1597m, 1458m, 1344s, 1244w, 1160s; HRMS (ESI):  $m/z$  calcd for  $\text{C}_{24}\text{H}_{26}\text{N}_2\text{O}_2\text{S}$   $[\text{M}+\text{H}]^+$ : 407.1788; found 407.1789.

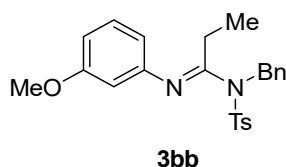

To an oven-dried sealed tube was added aniline **1bb** (36.9 mg, 0.30 mmol), ynamide **2a** (74.9 mg, 0.25 mmol), DCE (0.625 mL, ynamide *concn* = 0.40 M), and TfOH (11.1  $\mu\text{L}$ , 0.125 mmol) at 30 °C. The reaction vessel was capped and stirred at 30 °C for 3.0 h. After the reaction was judged to be complete by TLC, the reaction mixture was cooled to rt, filtered through a pad of silica gel,

concentrated in vacuo, and purified by flash silica gel column chromatography [gradient eluent: 25:1~20:1 petroleum ether/EtOAc] to afford *N*-arylimine **3bb** (75.6 mg, 0.18 mmol) in 72% yield.

**3bb**:  $R_f = 0.29$  [10:1 petroleum ether/EtOAc]; yellow solid; mp = 66–67 °C;  $^1\text{H NMR}$  (400 MHz,  $\text{CDCl}_3$ )  $\delta$  7.78-7.75 (m, 2H), 7.38-7.25 (m, 7H), 7.11 (t, 1H,  $J = 8.0$  Hz), 6.56-6.53 (m, 1H), 5.95-5.92 (m, 1H), 5.84 (t, 1H,  $J = 2.2$  Hz), 4.74 (s, 2H), 3.71 (s, 3H), 2.50 (q, 2H,  $J = 7.5$  Hz), 2.45 (s, 3H), 0.75 (t, 3H,  $J = 7.5$  Hz);  $^{13}\text{C NMR}$  (100 MHz,  $\text{CDCl}_3$ )  $\delta$  160.4, 160.3, 149.8, 144.3, 136.7, 135.7, 129.9, 129.8, 129.6, 128.3, 127.8, 127.7, 111.6, 108.7, 105.1, 55.3, 51.5, 26.1, 21.8, 11.5; IR (neat) ( $\text{cm}^{-1}$ ) 2918w, 1647m, 1594s, 1468m, 1342s, 1198w, 1152s, 1091m; HRMS (ESI):  $m/z$  calcd for  $\text{C}_{24}\text{H}_{26}\text{N}_2\text{O}_3\text{S}$   $[\text{M}+\text{H}]^+$ : 423.1737; found 423.1736.

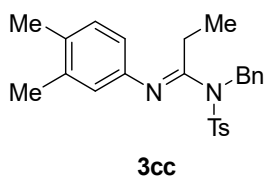

To an oven-dried sealed tube was added aniline **1cc** (36.4 mg, 0.30 mmol), ynamide **2a** (74.9 mg, 0.25 mmol), DCE (0.625 mL, ynamide *concn* = 0.40 M), and TfOH (11.1  $\mu\text{L}$ , 0.125 mmol) at 30 °C. The reaction vessel was capped and stirred at 30 °C for 21.0 h. After the reaction was judged to be complete by TLC, the reaction mixture was cooled to rt, filtered through a pad of silica gel, concentrated in vacuo, and purified by flash silica gel column chromatography [gradient eluent: 30:1~25:1 petroleum ether/EtOAc] to afford *N*-arylimine **3cc** (68.7 mg, 0.16 mmol) in 65% yield.

**3cc**:  $R_f = 0.51$  [10:1 petroleum ether/EtOAc]; yellow solid; mp = 91–92 °C;  $^1\text{H NMR}$  (400 MHz,  $\text{CDCl}_3$ )  $\delta$  7.76 (d, 2H,  $J = 8.3$  Hz), 7.38-7.23 (m, 7H), 6.96 (d, 1H,  $J = 7.8$  Hz), 6.15 (d, 1H,  $J = 2.2$  Hz), 6.08 (dd, 1H,  $J = 7.8, 2.2$  Hz), 4.73 (s, 2H), 2.50 (q, 2H,  $J = 7.5$  Hz), 2.44 (s, 3H), 2.17 (s, 3H), 2.16 (s, 3H), 0.73 (t, 3H,  $J = 7.5$  Hz);  $^{13}\text{C NMR}$  (100 MHz,  $\text{CDCl}_3$ )  $\delta$  160.3, 146.3, 144.1, 137.3, 136.7, 135.7, 131.4, 130.1, 129.8, 129.6, 128.2, 127.8, 127.7, 120.4, 116.4, 51.4, 25.9, 21.8, 20.0, 19.2, 11.4; IR (neat) ( $\text{cm}^{-1}$ ) 2924w, 1649m, 1456w, 1341s, 1158s, 1089m; HRMS (ESI):  $m/z$  calcd for  $\text{C}_{25}\text{H}_{28}\text{N}_2\text{O}_2\text{S}$   $[\text{M}+\text{H}]^+$ : 421.1944; found 421.1941.

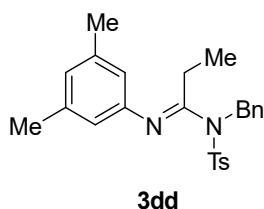

To an oven-dried sealed tube was added aniline **1dd** (36.4 mg, 0.30 mmol), ynamide **2a** (74.9 mg, 0.25 mmol), DCE (0.625 mL, ynamide *concn* = 0.40 M), and TfOH (11.1  $\mu\text{L}$ , 0.125 mmol) at 30 °C. The reaction vessel was capped and stirred at 30 °C for 6.0 h. After the reaction was judged to be

complete by TLC, the reaction mixture was cooled to rt, filtered through a pad of silica gel, concentrated in vacuo, and purified by flash silica gel column chromatography [gradient eluent: 25:1~20:1 petroleum ether/EtOAc] to afford *N*-arylimine **3dd** (68.5 mg, 0.16 mmol) in 65% yield.

**3dd**:  $R_f = 0.49$  [10:1 petroleum ether/EtOAc]; white solid; mp = 141–142 °C;  $^1\text{H}$  NMR (400 MHz,  $\text{CDCl}_3$ )  $\delta$  7.78-7.75 (m, 2H), 7.38-7.25 (m, 7H), 6.63 (t, 1H,  $J = 0.8$  Hz), 5.96 (s, 2H), 4.74 (s, 2H), 2.49 (q, 2H,  $J = 7.5$  Hz), 2.45 (s, 3H), 2.215 (s, 3H), 2.214 (s, 3H), 0.75 (t, 3H,  $J = 7.5$  Hz);  $^{13}\text{C}$  NMR (100 MHz,  $\text{CDCl}_3$ )  $\delta$  160.0, 148.4, 144.1, 138.7, 136.7, 135.8, 129.8, 129.5, 128.3, 127.8, 127.7, 125.1, 116.8, 51.3, 26.0, 21.8, 21.4, 11.4, one carbon missing due to overlap, overlapped signal at 21.4 ppm; IR (neat) ( $\text{cm}^{-1}$ ) 2980w, 1647m, 1452m, 1344s, 1200w, 1162s, 1091m; HRMS (ESI):  $m/z$  calcd for  $\text{C}_{25}\text{H}_{28}\text{N}_2\text{O}_2\text{S}$  [ $\text{M}+\text{H}$ ] $^+$ : 421.1944; found 421.1941.

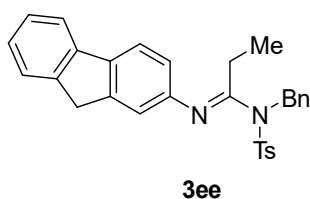

To an oven-dried sealed tube was added aniline **1ee** (54.4 mg, 0.30 mmol), ynamide **2a** (74.9 mg, 0.25 mmol), DCE (0.625 mL, ynamide *concn* = 0.40 M), and TfOH (11.1  $\mu\text{L}$ , 0.125 mmol) at 30 °C. The reaction vessel was capped and stirred at 30 °C for 12.7 h. After the reaction was judged to be complete by TLC, the reaction mixture was cooled to rt, filtered through a pad of silica gel, concentrated in vacuo, and purified by flash silica gel column chromatography [gradient eluent: 25:1~20:1 petroleum ether/EtOAc] to afford *N*-arylimine **3ee** (84.2 mg, 0.18 mmol) in 70% yield.

**3ee**:  $R_f = 0.32$  [10:1 petroleum ether/EtOAc]; colorless oil;  $^1\text{H}$  NMR (400 MHz,  $\text{CDCl}_3$ )  $\delta$  7.79 (d, 2H,  $J = 8.1$  Hz), 7.68 (d, 1H,  $J = 7.5$  Hz), 7.61 (d, 1H,  $J = 8.0$  Hz), 7.49-7.47 (m, 1H), 7.42-7.22 (m, 9H), 6.54 (s, 1H), 6.33 (dd, 1H,  $J = 8.0, 1.8$  Hz), 4.78 (s, 2H), 3.81 (s, 2H), 2.55 (q, 2H,  $J = 7.5$  Hz), 2.46 (s, 3H), 0.77 (t, 3H,  $J = 7.5$  Hz);  $^{13}\text{C}$  NMR (100 MHz,  $\text{CDCl}_3$ )  $\delta$  160.6, 147.5, 144.5, 144.3, 142.9, 141.6, 137.4, 136.7, 135.7, 129.9, 129.5, 128.3, 127.85, 127.76, 126.9, 126.3, 125.1, 120.4, 119.4, 118.0, 115.9, 51.4, 37.1, 26.1, 21.8, 11.4; IR (neat) ( $\text{cm}^{-1}$ ) 2978w, 1736m, 1647m, 1454m, 1349s, 1273w, 1162s, 1089m; HRMS (ESI):  $m/z$  calcd for  $\text{C}_{30}\text{H}_{28}\text{N}_2\text{O}_2\text{S}$  [ $\text{M}+\text{H}$ ] $^+$ : 481.1944; found 481.1945.

#### 1.4 Hydroamination of Different Ynamides with Aniline 1a (Table 3).

*N*-arylimines **3oo**<sup>17</sup>, **3pp**<sup>18</sup>, **3tt**<sup>18</sup> and **3uu**<sup>17</sup> were known compounds, the data were matched with reported values. *N*-arylimines **3ff-3nn**, **3qq-3ss**, **3vv** and **3ww** were new compounds.

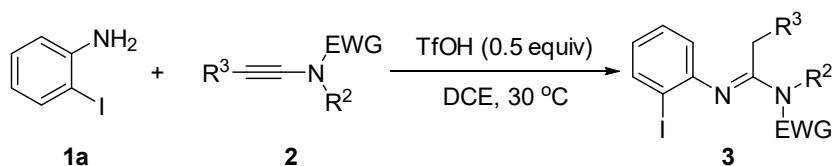

To an oven-dried sealed tube was added aniline **1a** (65.7 mg, 0.30 mmol), ynamide **2b**<sup>2</sup> (78.9 mg, 0.25 mmol), DCE (0.625 mL, ynamide *concn* = 0.40 M), and TfOH (11.1  $\mu$ L, 0.125 mmol) at 30 °C. The reaction vessel was capped and stirred at 30 °C for 3.0 h. After the reaction was judged to be complete by TLC, the reaction mixture was cooled to rt, filtered through a pad of silica gel, concentrated in vacuo, and purified by flash silica gel column chromatography [gradient eluent: 25:1~20:1 petroleum ether/EtOAc] to afford *N*-arylimine **3ff** (128.4 mg, 0.24 mmol) in 96% yield.

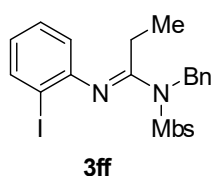

**3ff**:  $R_f$  = 0.25 [10:1 petroleum ether/EtOAc]; white solid; mp = 79–80 °C; <sup>1</sup>H NMR (400 MHz, CDCl<sub>3</sub>)  $\delta$  7.89-7.86 (m, 2H), 7.73 (dd, 1H,  $J$  = 8.0, 1.4 Hz), 7.42-7.39 (m, 2H), 7.32-7.23 (m, 3H), 7.16-7.12 (m, 1H), 6.99-6.95 (m, 2H), 6.71-6.66 (m, 1H), 6.14 (dd, 1H,  $J$  = 7.8, 1.5 Hz), 4.96 (s, 2H), 3.84 (s, 3H), 2.46 (q, 2H,  $J$  = 7.5 Hz), 0.92 (t, 3H,  $J$  = 7.4 Hz); <sup>13</sup>C NMR (100 MHz, CDCl<sub>3</sub>)  $\delta$  163.4, 160.8, 150.0, 139.0, 137.1, 131.2, 130.1, 129.0, 128.8, 128.3, 127.5, 124.7, 119.7, 114.4, 90.1, 55.8, 51.1, 25.9, 11.5; IR (neat) (cm<sup>-1</sup>) 2940w, 1641m, 1429w, 1338s, 1255m, 1155s, 1026m; HRMS (ESI):  $m/z$  calcd for C<sub>23</sub>H<sub>23</sub>IN<sub>2</sub>O<sub>3</sub>S [M+H]<sup>+</sup>: 535.0547; found 535.0545.

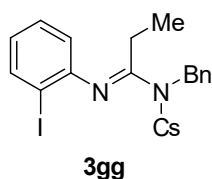

To an oven-dried sealed tube was added aniline **1a** (65.7 mg, 0.30 mmol), ynamide **2c**<sup>3</sup> (80.0 mg, 0.25 mmol), DCE (0.625 mL, ynamide *concn* = 0.40 M), and TfOH (11.1  $\mu$ L, 0.125 mmol) at 30 °C. The reaction vessel was capped and stirred at 30 °C for 3.0 h. After the reaction was judged to be complete by TLC, the reaction mixture was cooled to rt, filtered through a pad of silica gel, concentrated in vacuo, and purified by flash silica gel column chromatography [gradient eluent: 35:1~30:1 petroleum ether/EtOAc] to afford *N*-arylimine **3gg** (128.4 mg, 0.24 mmol) in 95% yield.

**3gg**:  $R_f$  = 0.31 [20:1 petroleum ether/EtOAc]; white solid; mp = 78–79 °C; <sup>1</sup>H NMR (400 MHz, CDCl<sub>3</sub>)  $\delta$  7.88-7.85 (m, 2H), 7.74 (dd, 1H,  $J$  = 8.0, 1.4 Hz), 7.47-7.44 (m, 2H), 7.40-7.38 (m, 2H), 7.32-7.26 (m, 3H), 7.19-7.15 (m, 1H), 6.74-6.69 (m, 1H), 6.20 (dd, 1H,  $J$  = 7.8, 1.6 Hz), 4.97 (s, 2H),

2.42 (q, 2H,  $J = 7.5$  Hz), 0.93 (t, 3H,  $J = 7.5$  Hz);  $^{13}\text{C}$  NMR (100 MHz,  $\text{CDCl}_3$ )  $\delta$  160.7, 149.8, 139.8, 139.1, 138.2, 136.6, 129.7, 129.4, 129.1, 128.7, 128.5, 127.8, 124.9, 119.6, 89.9, 51.2, 25.8, 11.5; IR (neat) ( $\text{cm}^{-1}$ ) 3059w, 1650m, 1459w, 1344s, 1210m, 1157s, 1087m; HRMS (ESI):  $m/z$  calcd for  $\text{C}_{22}\text{H}_{20}\text{ClIN}_2\text{O}_2\text{S}$   $[\text{M}+\text{H}]^+$ : 539.0051; found 539.0049.

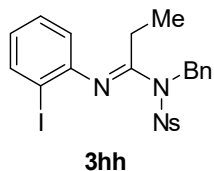

To an oven-dried sealed tube was added aniline **1a** (65.7 mg, 0.30 mmol), ynamide **2d**<sup>4</sup> (82.6 mg, 0.25 mmol), DCE (0.625 mL, ynamide *concn* = 0.40 M), and TfOH (11.1  $\mu\text{L}$ , 0.125 mmol) at 30 °C. The reaction vessel was capped and stirred at 30 °C for 3.0 h. After the reaction was judged to be complete by TLC, the reaction mixture was cooled to rt, filtered through a pad of silica gel, concentrated in vacuo, and purified by flash silica gel column chromatography [gradient eluent: 25:1~20:1 petroleum ether/EtOAc] to afford *N*-arylimine **3hh** (122.4 mg, 0.22 mmol) in 89% yield.

**3hh**:  $R_f$  = 0.32 [10:1 petroleum ether/EtOAc]; white solid; mp = 79–80 °C;  $^1\text{H}$  NMR (400 MHz,  $\text{CDCl}_3$ )  $\delta$  8.28–8.25 (m, 2H), 8.06–8.02 (m, 2H), 7.76 (dd, 1H,  $J = 8.0, 1.4$  Hz), 7.39–7.37 (m, 2H), 7.33–7.29 (m, 3H), 7.25–7.21 (m, 1H), 6.79–6.75 (m, 1H), 6.36 (dd, 1H,  $J = 7.9, 1.6$  Hz), 5.02 (s, 2H), 2.39 (q, 2H,  $J = 7.5$  Hz), 0.99 (t, 3H,  $J = 7.5$  Hz);  $^{13}\text{C}$  NMR (100 MHz,  $\text{CDCl}_3$ )  $\delta$  160.6, 150.2, 149.4, 145.7, 139.2, 136.1, 129.9, 129.2, 128.7, 128.6, 128.2, 125.3, 124.1, 119.6, 89.9, 51.2, 25.4, 11.4; IR (neat) ( $\text{cm}^{-1}$ ) 2935w, 1648s, 1528s, 1457m, 1341s, 1227w, 1171s, 1086m; HRMS (ESI):  $m/z$  calcd for  $\text{C}_{22}\text{H}_{20}\text{IN}_3\text{O}_4\text{S}$   $[\text{M}+\text{H}]^+$ : 550.0292; found 550.0289.

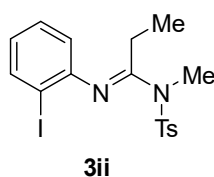

To an oven-dried sealed tube was added aniline **1a** (65.7 mg, 0.30 mmol), ynamide **2e**<sup>5</sup> (55.9 mg, 0.25 mmol), DCE (0.625 mL, ynamide *concn* = 0.40 M), and TfOH (11.1  $\mu\text{L}$ , 0.125 mmol) at 30 °C. The reaction vessel was capped and stirred at 30 °C for 3.0 h. After the reaction was judged to be complete by TLC, the reaction mixture was cooled to rt, filtered through a pad of silica gel, concentrated in vacuo, and purified by flash silica gel column chromatography [gradient eluent: 30:1~20:1 petroleum ether/EtOAc] to afford *N*-arylimine **3ii** (100.9 mg, 0.23 mmol) in 91% yield.

**3ii**:  $R_f$  = 0.27 [20:1 petroleum ether/EtOAc]; colorless oil;  $^1\text{H}$  NMR (400 MHz,  $\text{CDCl}_3$ )  $\delta$  7.79–7.76 (m, 3H), 7.34 (d, 2H,  $J = 8.1$  Hz), 7.28–7.24 (m, 1H), 6.77–6.73 (m, 1H), 6.59 (dd, 1H,  $J = 7.9, 1.6$  Hz), 3.29 (s, 3H), 2.62 (q, 2H,  $J = 7.5$  Hz), 2.43 (s, 3H), 1.12 (t, 3H,  $J = 7.5$  Hz);  $^{13}\text{C}$  NMR (100

MHz, CDCl<sub>3</sub>)  $\delta$  162.6, 150.0, 144.4, 139.1, 135.5, 130.0, 129.1, 127.6, 124.9, 119.8, 90.9, 36.5, 25.7, 21.7, 12.2; IR (neat) (cm<sup>-1</sup>) 2935w, 1639m, 1456w, 1351s, 1224m, 1159s; HRMS (ESI): m/z calcd for C<sub>17</sub>H<sub>19</sub>IN<sub>2</sub>O<sub>2</sub>S [M+H]<sup>+</sup>: 443.0285; found 443.0284.

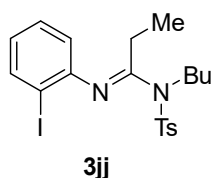

To an oven-dried sealed tube was added aniline **1a** (65.7 mg, 0.30 mmol), ynamide **2f**<sup>6</sup> (66.4 mg, 0.25 mmol), DCE (0.625 mL, ynamide *concn* = 0.40 M), and TfOH (11.1  $\mu$ L, 0.125 mmol) at 30 °C. The reaction vessel was capped and stirred at 30 °C for 3.0 h. After the reaction was judged to be complete by TLC, the reaction mixture was cooled to rt, filtered through a pad of silica gel, concentrated in vacuo, and purified by flash silica gel column chromatography [gradient eluent: 40:1~35:1 petroleum ether/EtOAc] to afford *N*-arylimine **3jj** (111.6 mg, 0.23 mmol) in 92% yield.

**3jj**:  $R_f$  = 0.51 [10:1 petroleum ether/EtOAc]; colorless oil; <sup>1</sup>H NMR (400 MHz, CDCl<sub>3</sub>)  $\delta$  7.82-7.77 (m, 3H), 7.32-7.30 (m, 2H), 7.29-7.25 (m, 1H), 6.77-6.73 (m, 1H), 6.58 (dd, 1H,  $J$  = 7.9, 1.5 Hz), 3.82 (t, 2H,  $J$  = 7.5 Hz), 2.55 (q, 2H,  $J$  = 7.5 Hz), 2.42 (s, 3H), 1.79-1.72 (m, 2H), 1.43-1.36 (m, 2H), 1.08 (t, 3H,  $J$  = 7.5 Hz), 0.94 (t, 3H,  $J$  = 7.4 Hz); <sup>13</sup>C NMR (100 MHz, CDCl<sub>3</sub>)  $\delta$  161.7, 150.2, 144.1, 139.2, 137.0, 129.9, 129.1, 127.7, 124.8, 119.8, 90.6, 48.0, 31.7, 21.7, 20.1, 14.0, 11.9, one carbon missing due to overlap, overlapped signal at 20.1 ppm; IR (neat) (cm<sup>-1</sup>) 2957w, 1638s, 1459m, 1348s, 1228w, 1163s, 1089m; HRMS (ESI): m/z calcd for C<sub>20</sub>H<sub>25</sub>IN<sub>2</sub>O<sub>2</sub>S [M+H]<sup>+</sup>: 485.0754; found 485.0753.

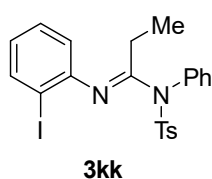

To an oven-dried sealed tube was added aniline **1a** (65.7 mg, 0.30 mmol), ynamide **2g**<sup>6</sup> (71.3 mg, 0.25 mmol), DCE (0.625 mL, ynamide *concn* = 0.40 M), and TfOH (11.1  $\mu$ L, 0.125 mmol) at 30 °C. The reaction vessel was capped and stirred at 30 °C for 3.0 h. After the reaction was judged to be complete by TLC, the reaction mixture was cooled to rt, filtered through a pad of silica gel, concentrated in vacuo, and purified by flash silica gel column chromatography [gradient eluent: 25:1~20:1 petroleum ether/EtOAc] to afford *N*-arylimine **3kk** (113.5 mg, 0.23 mmol) in 90% yield.

**3kk**:  $R_f$  = 0.38 [10:1 petroleum ether/EtOAc]; white solid; mp = 146–147 °C; <sup>1</sup>H NMR (400 MHz, CDCl<sub>3</sub>)  $\delta$  7.76-7.71 (m, 3H), 7.43 (s, 5H), 7.30-7.26 (m, 1H), 7.19 (d, 2H,  $J$  = 8.1 Hz), 6.80-6.73 (m, 2H), 2.39 (s, 3H), 1.89 (q, 2H,  $J$  = 7.5 Hz), 0.96 (t, 3H,  $J$  = 7.6 Hz); <sup>13</sup>C NMR (100 MHz, CDCl<sub>3</sub>)  $\delta$

160.0, 150.1, 143.8, 138.9, 137.4, 136.4, 130.7, 130.0, 129.33, 129.29, 129.1, 128.9, 124.8, 119.7, 90.3, 24.6, 21.8, 11.4; IR (neat) ( $\text{cm}^{-1}$ ) 2920w, 1648s, 1458m, 1356s, 1209s, 1166s, 1090m, 1030w; HRMS (ESI):  $m/z$  calcd for  $\text{C}_{22}\text{H}_{21}\text{IN}_2\text{O}_2\text{S}$   $[\text{M}+\text{H}]^+$ : 505.0441; found 505.0439.

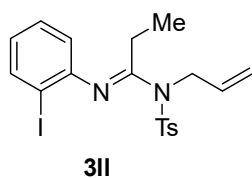

To an oven-dried sealed tube was added aniline **1a** (65.7 mg, 0.30 mmol), ynamide **2h**<sup>7</sup> (62.4 mg, 0.25 mmol), DCE (0.625 mL, ynamide *concn* = 0.40 M), and TfOH (11.1  $\mu\text{L}$ , 0.125 mmol) at 30 °C. The reaction vessel was capped and stirred at 30 °C for 3.0 h. After the reaction was judged to be complete by TLC, the reaction mixture was cooled to rt, filtered through a pad of silica gel, concentrated in vacuo, and purified by flash silica gel column chromatography [gradient eluent: 30:1~25:1 petroleum ether/EtOAc] to afford *N*-arylimine **3II** (107.7 mg, 0.23 mmol) in 92% yield.

**3II**:  $R_f$  = 0.49 [10:1 petroleum ether/EtOAc]; white solid; mp = 51–52 °C; <sup>1</sup>H NMR (400 MHz,  $\text{CDCl}_3$ )  $\delta$  7.86–7.83 (m, 2H), 7.77 (dd, 1H,  $J$  = 8.0, 1.4 Hz), 7.32–7.29 (m, 2H), 7.27–7.23 (m, 1H), 6.76–6.72 (m, 1H), 6.58 (dd, 1H,  $J$  = 7.8, 1.6 Hz), 6.04–5.94 (m, 1H), 5.36–5.30 (m, 1H), 5.23–5.19 (m, 1H), 4.52 (d, 2H,  $J$  = 5.7 Hz), 2.48 (q, 2H,  $J$  = 7.5 Hz), 2.42 (s, 3H), 1.05 (t, 3H,  $J$  = 7.5 Hz); <sup>13</sup>C NMR (100 MHz,  $\text{CDCl}_3$ )  $\delta$  160.9, 150.1, 144.2, 139.1, 137.2, 133.8, 129.8, 129.1, 128.0, 124.8, 120.0, 118.4, 90.5, 50.2, 25.5, 21.8, 11.8; IR (neat) ( $\text{cm}^{-1}$ ) 2922w, 1654s, 1429m, 1334s, 1282m, 1165s; HRMS (ESI):  $m/z$  calcd for  $\text{C}_{19}\text{H}_{21}\text{IN}_2\text{O}_2\text{S}$   $[\text{M}+\text{H}]^+$ : 469.0441; found 469.0440.

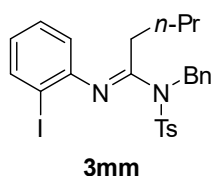

To an oven-dried sealed tube was added aniline **1a** (65.7 mg, 0.30 mmol), ynamide **2i**<sup>8</sup> (81.9 mg, 0.25 mmol), DCE (0.625 mL, ynamide *concn* = 0.40 M), and TfOH (11.1  $\mu\text{L}$ , 0.125 mmol) at 30 °C. The reaction vessel was capped and stirred at 30 °C for 3.0 h. After the reaction was judged to be complete by TLC, the reaction mixture was cooled to rt, filtered through a pad of silica gel, concentrated in vacuo, and purified by flash silica gel column chromatography [gradient eluent: 25:1~20:1 petroleum ether/EtOAc] to afford *N*-arylimine **3mm** (130.7 mg, 0.24 mmol) in 96% yield.

**3mm**:  $R_f$  = 0.38 [20:1 petroleum ether/EtOAc]; colorless oil; <sup>1</sup>H NMR (400 MHz,  $\text{CDCl}_3$ )  $\delta$  7.85 (d, 2H,  $J$  = 8.3 Hz), 7.72 (dd, 1H,  $J$  = 8.0, 1.3 Hz), 7.43–7.41 (m, 2H), 7.32–7.23 (m, 5H), 7.16–7.12 (m, 1H), 6.71–6.66 (m, 1H), 6.15 (dd, 1H,  $J$  = 7.9, 1.6 Hz), 4.95 (s, 2H), 2.45–2.41 (m, 5H), 1.40–1.33 (m, 2H), 1.00–0.90 (m, 2H), 0.66 (t, 3H,  $J$  = 7.3 Hz); <sup>13</sup>C NMR (100 MHz,  $\text{CDCl}_3$ )  $\delta$  160.0, 150.0, 144.3,

139.0, 137.1, 136.8, 129.9, 129.0, 128.9, 128.3, 128.0, 127.5, 124.7, 119.9, 90.1, 51.2, 32.4, 29.1, 22.4, 21.7, 13.6; IR (neat) (cm<sup>-1</sup>) 2960w, 1643m, 1457w, 1351s, 1163s, 1089m; HRMS (ESI): m/z calcd for C<sub>25</sub>H<sub>27</sub>IN<sub>2</sub>O<sub>2</sub>S [M+H]<sup>+</sup>: 547.0911; found 547.0910.

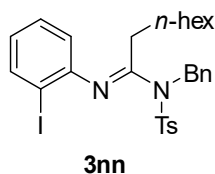

To an oven-dried sealed tube was added aniline **1a** (65.7 mg, 0.30 mmol), ynamide **2j**<sup>1</sup> (92.4 mg, 0.25 mmol), DCE (0.625 mL, ynamide *concn* = 0.40 M), and TfOH (11.1 μL, 0.125 mmol) at 30 °C. The reaction vessel was capped and stirred at 30 °C for 3.0 h. After the reaction was judged to be complete by TLC, the reaction mixture was cooled to rt, filtered through a pad of silica gel, concentrated in vacuo, and purified by flash silica gel column chromatography [gradient eluent: 35:1~30:1 petroleum ether/EtOAc] to afford *N*-arylimine **3nn** (133.1 mg, 0.23 mmol) in 90% yield.

**3nn**: *R<sub>f</sub>* = 0.38 [20:1 petroleum ether/EtOAc]; colorless oil; <sup>1</sup>H NMR (400 MHz, CDCl<sub>3</sub>) δ 7.84 (d, 2H, *J* = 8.3 Hz), 7.73 (dd, 1H, *J* = 8.0, 1.4 Hz), 7.44-7.41 (m, 2H), 7.32-7.24 (m, 5H), 7.16-7.12 (m, 1H), 6.71-6.67 (m, 1H), 6.16 (dd, 1H, *J* = 7.9, 1.6 Hz), 4.96 (s, 2H), 2.44-2.40 (m, 5H), 1.40-1.33 (m, 2H), 1.20-1.13 (m, 2H), 1.09-0.98 (m, 4H), 0.94-0.87 (m, 2H), 0.82 (t, 3H, *J* = 7.2 Hz); <sup>13</sup>C NMR (100 MHz, CDCl<sub>3</sub>) δ 160.1, 150.0, 144.2, 139.0, 137.1, 136.8, 129.9, 129.0, 128.9, 128.3, 128.0, 127.6, 124.7, 119.9, 90.1, 51.2, 32.6, 31.6, 29.3, 28.7, 26.9, 22.7, 21.7, 14.2; IR (neat) (cm<sup>-1</sup>) 2925w, 1641m, 1577w, 1458m, 1350s, 1163s, 1090m; HRMS (ESI): m/z calcd for C<sub>28</sub>H<sub>33</sub>IN<sub>2</sub>O<sub>2</sub>S [M+H]<sup>+</sup>: 589.1380; found 589.1378.

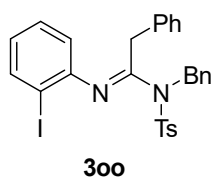

To an oven-dried sealed tube was added aniline **1a** (65.7 mg, 0.30 mmol), ynamide **2k**<sup>1</sup> (90.4 mg, 0.25 mmol), DCE (0.625 mL, ynamide *concn* = 0.40 M), and TfOH (11.1 μL, 0.125 mmol) at 30 °C. The reaction vessel was capped and stirred at 30 °C for 3.0 h. After the reaction was judged to be complete by TLC, the reaction mixture was cooled to rt, filtered through a pad of silica gel, concentrated in vacuo, and purified by flash silica gel column chromatography [gradient eluent: 30:1~25:1 petroleum ether/EtOAc] to afford *N*-arylimine **3oo** (134.1 mg, 0.23 mmol) in 92% yield.

**3oo**: *R<sub>f</sub>* = 0.42 [10:1 petroleum ether/EtOAc]; white solid; mp = 75–76 °C; <sup>1</sup>H NMR (400 MHz, CDCl<sub>3</sub>) δ 7.83 (d, 2H, *J* = 8.4 Hz), 7.72 (dd, 1H, *J* = 7.9, 1.3 Hz), 7.27 (d, 2H, *J* = 7.9 Hz), 7.21-7.08 (m, 9H), 6.88 (dd, 2H, *J* = 7.4, 1.7 Hz), 6.68 (td, 1H, *J* = 7.6, 1.6 Hz), 6.24 (dd, 1H, *J* = 8.0, 1.7 Hz),



4.83 (s, 2H), 3.79 (s, 2H), 2.41 (s, 3H);  $^{13}\text{C}$  NMR (100 MHz,  $\text{CDCl}_3$ )  $\delta$  156.7, 149.6, 144.3, 139.1, 136.5, 136.4, 134.7, 129.7, 129.0, 128.9, 128.57, 128.56, 128.55, 128.3, 127.5, 126.8, 125.0, 120.2, 90.3, 51.0, 38.2, 21.7; IR (neat) ( $\text{cm}^{-1}$ ) 3028w, 1655m, 1454w, 1350s, 1221m, 1167s; HRMS (ESI):  $m/z$  calcd for  $\text{C}_{28}\text{H}_{25}\text{IN}_2\text{O}_2\text{S}$   $[\text{M}+\text{H}]^+$ : 581.0754; found 581.0755. Spectral data are in agreement with literature values<sup>17</sup>.

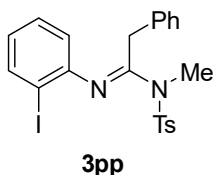

To an oven-dried sealed tube was added aniline **1a** (65.7 mg, 0.30 mmol), ynamide **2l**<sup>9</sup> (71.3 mg, 0.25 mmol), DCE (0.625 mL, ynamide *concn* = 0.40 M), and TfOH (11.1  $\mu\text{L}$ , 0.125 mmol) at 30 °C. The reaction vessel was capped and stirred at 30 °C for 3.0 h. After the reaction was judged to be complete by TLC, the reaction mixture was cooled to rt, filtered through a pad of silica gel, concentrated in vacuo, and purified by flash silica gel column chromatography [gradient eluent: 25:1~20:1 petroleum ether/EtOAc] to afford *N*-arylimine **3pp** (123.2 mg, 0.24 mmol) in 98% yield.

**3pp**:  $R_f$  = 0.27 [10:1 petroleum ether/EtOAc]; colorless oil;  $^1\text{H}$  NMR (400 MHz,  $\text{CDCl}_3$ )  $\delta$  7.75 (dd, 1H,  $J$  = 7.9, 1.4 Hz), 7.66 (d, 2H,  $J$  = 8.4 Hz), 7.27-7.19 (m, 6H), 7.08 (d, 2H,  $J$  = 6.6 Hz), 6.76-6.72 (m, 1H), 6.61 (dd, 1H,  $J$  = 7.8, 1.6 Hz), 4.04 (s, 2H), 3.23 (s, 3H), 2.39 (s, 3H);  $^{13}\text{C}$  NMR (100 MHz,  $\text{CDCl}_3$ )  $\delta$  158.6, 149.4, 144.3, 139.1, 135.34, 135.28, 129.8, 129.02, 129.00, 128.6, 127.9, 126.8, 125.2, 120.2, 91.5, 37.9, 36.4, 21.7; IR (neat) ( $\text{cm}^{-1}$ ) 2920w, 1660m, 1452w, 1344s, 1255w, 1163s, 1084m; HRMS (ESI):  $m/z$  calcd for  $\text{C}_{22}\text{H}_{21}\text{IN}_2\text{O}_2\text{S}$   $[\text{M}+\text{H}]^+$ : 505.0441; found 505.0440. Spectral data are in agreement with literature values<sup>18</sup>.

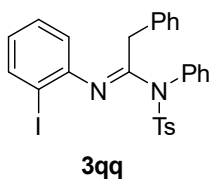

To an oven-dried sealed tube was added aniline **1a** (65.7 mg, 0.30 mmol), ynamide **2m**<sup>10</sup> (86.9 mg, 0.25 mmol), DCE (0.625 mL, ynamide *concn* = 0.40 M), and TfOH (11.1  $\mu\text{L}$ , 0.125 mmol) at 30 °C. The reaction vessel was capped and stirred at 30 °C for 3.0 h. After the reaction was judged to be complete by TLC, the reaction mixture was cooled to rt, filtered through a pad of silica gel, concentrated in vacuo, and purified by flash silica gel column chromatography [gradient eluent: 25:1~20:1 petroleum ether/EtOAc] to afford *N*-arylimine **3qq** (128.1 mg, 0.23 mmol) in 90% yield.

**3qq**:  $R_f$  = 0.29 [10:1 petroleum ether/EtOAc]; white solid; mp = 120–121 °C;  $^1\text{H}$  NMR (400 MHz,  $\text{CDCl}_3$ )  $\delta$  7.76-7.73 (m, 3H), 7.38-7.34 (m, 1H), 7.30-7.26 (m, 2H), 7.24-7.18 (m, 6H), 7.08 (d, 2H,  $J$

= 7.7 Hz), 6.90-6.87 (m, 2H), 6.81 (dd, 1H,  $J = 7.8, 1.6$  Hz), 6.76-6.72 (m, 1H), 3.23 (s, 2H), 2.41 (s, 3H);  $^{13}\text{C}$  NMR (100 MHz,  $\text{CDCl}_3$ )  $\delta$  156.2, 149.9, 143.9, 138.9, 136.9, 136.5, 134.6, 131.1, 130.1, 129.3, 129.1, 129.0, 128.7, 128.6, 126.9, 125.1, 119.9, 90.5, 37.1, 21.8, one carbon missing due to overlap, overlapped signal at 129.0 ppm; IR (neat) ( $\text{cm}^{-1}$ ) 2985w, 1740m, 1671s, 1493m, 1349s, 1267m, 1153s, 1087m; HRMS (ESI):  $m/z$  calcd for  $\text{C}_{27}\text{H}_{23}\text{IN}_2\text{O}_2\text{S}$   $[\text{M}+\text{H}]^+$ : 567.0598; found 567.0596.

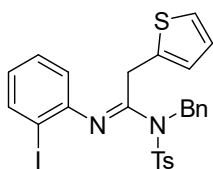

**3rr**

To an oven-dried sealed tube was added aniline **1a** (65.7 mg, 0.30 mmol), ynamide **2n**<sup>11</sup> (91.9 mg, 0.25 mmol), DCE (0.625 mL, ynamide *concn* = 0.40 M), and TfOH (11.1  $\mu\text{L}$ , 0.125 mmol) at 30 °C. The reaction vessel was capped and stirred at 30 °C for 3.0 h. After the reaction was judged to be complete by TLC, the reaction mixture was cooled to rt, filtered through a pad of silica gel, concentrated in vacuo, and purified by flash silica gel column chromatography [gradient eluent: 25:1~20:1 petroleum ether/EtOAc] to afford *N*-arylimine **3rr** (95.0 mg, 0.16 mmol) in 65% yield.

**3rr**:  $R_f = 0.24$  [20:1 petroleum ether/EtOAc]; white solid; mp = 101–102 °C;  $^1\text{H}$  NMR (400 MHz,  $\text{CDCl}_3$ )  $\delta$  7.89 (d, 2H,  $J = 8.4$  Hz), 7.75 (dd, 1H,  $J = 8.0, 1.4$  Hz), 7.32 (d, 2H,  $J = 8.1$  Hz), 7.23-7.10 (m, 7H), 6.86-6.84 (m, 1H), 6.74-6.70 (m, 1H), 6.65 (dd, 1H,  $J = 3.4, 1.2$  Hz), 6.19 (dd, 1H,  $J = 7.9, 1.5$  Hz), 4.81 (s, 2H), 3.99 (s, 2H), 2.44 (s, 3H);  $^{13}\text{C}$  NMR (100 MHz,  $\text{CDCl}_3$ )  $\delta$  155.9, 149.5, 144.5, 139.1, 136.3, 136.2, 135.7, 129.9, 129.1, 128.5, 128.3, 127.5, 127.4, 126.9, 125.2, 124.8, 120.3, 90.0, 51.3, 33.0, 21.8, one carbon missing due to overlap, overlapped signal at 128.5 ppm; IR (neat) ( $\text{cm}^{-1}$ ) 2910w, 1656m, 1458w, 1349s, 1165s, 1088m; HRMS (ESI):  $m/z$  calcd for  $\text{C}_{26}\text{H}_{23}\text{IN}_2\text{O}_2\text{S}_2$   $[\text{M}+\text{H}]^+$ : 587.0318; found 587.0317.

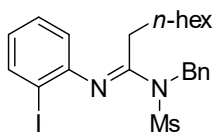

**3ss**

To an oven-dried sealed tube was added aniline **1a** (65.7 mg, 0.30 mmol), ynamide **2o**<sup>12</sup> (73.4 mg, 0.25 mmol), DCE (0.625 mL, ynamide *concn* = 0.40 M), and TfOH (11.1  $\mu\text{L}$ , 0.125 mmol) at 30 °C. The reaction vessel was capped and stirred at 30 °C for 3.0 h. After the reaction was judged to be complete by TLC, the reaction mixture was cooled to rt, filtered through a pad of silica gel,

concentrated in vacuo, and purified by flash silica gel column chromatography [gradient eluent: 25:1~20:1 petroleum ether/EtOAc] to afford *N*-arylimine **3ss** (112.3 mg, 0.22 mmol) in 88% yield.

**3ss**:  $R_f = 0.35$  [10:1 petroleum ether/EtOAc]; colorless oil;  $^1\text{H}$  NMR (400 MHz,  $\text{CDCl}_3$ )  $\delta$  7.81 (dd, 1H,  $J = 8.0, 1.4$  Hz), 7.50-7.48 (m, 2H), 7.39-7.29 (m, 3H), 7.28-7.24 (m, 1H), 6.80-6.76 (m, 1H), 6.56 (dd, 1H,  $J = 7.9, 1.6$  Hz), 5.00 (s, 2H), 3.23 (s, 3H), 2.33-2.29 (m, 2H), 1.45-1.38 (m, 2H), 1.22-1.15 (m, 2H), 1.11-1.00 (m, 6H), 0.83 (t, 3H,  $J = 7.1$  Hz);  $^{13}\text{C}$  NMR (100 MHz,  $\text{CDCl}_3$ )  $\delta$  160.7, 149.8, 139.0, 136.6, 129.1, 128.8, 128.6, 128.0, 125.1, 120.1, 90.7, 50.6, 42.7, 31.5, 31.3, 29.3, 28.7, 26.7, 22.7, 14.2; IR (neat) ( $\text{cm}^{-1}$ ) 2927w, 1649s, 1460m, 1348s, 1217w, 1153m; HRMS (ESI):  $m/z$  calcd for  $\text{C}_{22}\text{H}_{29}\text{IN}_2\text{O}_2\text{S}$   $[\text{M}+\text{H}]^+$ : 513.1067; found 513.1065.

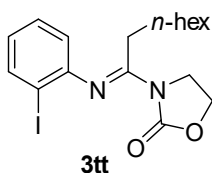

To an oven-dried sealed tube was added aniline **1a** (65.7 mg, 0.30 mmol), ynamide **2p**<sup>13</sup> (48.9 mg, 0.25 mmol), DCE (0.625 mL, ynamide *concn* = 0.40 M), and TfOH (11.1  $\mu\text{L}$ , 0.125 mmol) at 30 °C. The reaction vessel was capped and stirred at 30 °C for 3.0 h. After the reaction was judged to be complete by TLC, the reaction mixture was cooled to rt, filtered through a pad of silica gel, concentrated in vacuo, and purified by flash silica gel column chromatography [gradient eluent: 20:1~10:1 petroleum ether/EtOAc] to afford *N*-arylimine **3tt** (77.2 mg, 0.19 mmol) in 75% yield.

**3tt**:  $R_f = 0.24$  [10:1 petroleum ether/EtOAc]; colorless oil;  $^1\text{H}$  NMR (400 MHz,  $\text{CDCl}_3$ )  $\delta$  7.83 (dd, 1H,  $J = 7.9, 1.3$  Hz), 7.32-7.27 (m, 1H), 6.81-6.77 (m, 1H), 6.73 (dd, 1H,  $J = 7.8, 1.5$  Hz), 4.46-4.42 (m, 2H), 4.23-4.19 (m, 2H), 2.71-2.67 (m, 2H), 1.55-1.48 (m, 2H), 1.23-1.12 (m, 8H), 0.83 (t, 3H,  $J = 6.9$  Hz);  $^{13}\text{C}$  NMR (100 MHz,  $\text{CDCl}_3$ )  $\delta$  158.6, 154.1, 149.6, 139.0, 129.0, 124.9, 120.5, 92.3, 62.1, 44.8, 31.6, 29.5, 28.7, 28.3, 27.1, 22.7, 14.2; IR (neat) ( $\text{cm}^{-1}$ ) 2925w, 1768s, 1643m, 1479w, 1387s, 1277w, 1197s, 1093m; HRMS (ESI):  $m/z$  calcd for  $\text{C}_{17}\text{H}_{23}\text{IN}_2\text{O}_2$   $[\text{M}+\text{H}]^+$ : 415.0877; found 415.0877. Spectral data are in agreement with literature values<sup>18</sup>.

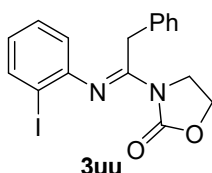

To an oven-dried sealed tube was added aniline **1a** (65.7 mg, 0.30 mmol), ynamide **2q**<sup>14</sup> (46.8 mg, 0.25 mmol), DCE (0.625 mL, ynamide *concn* = 0.40 M), and TfOH (11.1  $\mu\text{L}$ , 0.125 mmol) at 30 °C. The reaction vessel was capped and stirred at 30 °C for 5.0 h. After the reaction was judged to be complete by TLC, the reaction mixture was cooled to rt, filtered through a pad of silica gel,

concentrated in vacuo, and purified by flash silica gel column chromatography [gradient eluent: 15:1~6:1 petroleum ether/EtOAc] to afford *N*-arylimine **3uu** (82.8 mg, 0.20 mmol) in 82% yield.

**3uu**:  $R_f = 0.36$  [4:1 petroleum ether/EtOAc]; colorless oil;  $^1\text{H NMR}$  (400 MHz,  $\text{CDCl}_3$ )  $\delta$  7.80 (dd, 1H,  $J = 7.9, 1.4$  Hz), 7.23-7.13 (m, 4H), 7.08 (d, 2H,  $J = 7.1$  Hz), 6.76-6.70 (m, 2H), 4.27-4.21 (m, 4H), 4.18-4.14 (m, 2H);  $^{13}\text{C NMR}$  (100 MHz,  $\text{CDCl}_3$ )  $\delta$  155.4, 153.8, 148.7, 138.9, 135.3, 128.9, 128.6, 128.4, 126.6, 125.1, 120.6, 92.8, 61.9, 44.9, 33.5; IR (neat) ( $\text{cm}^{-1}$ ) 2920w, 1762s, 1635m, 1452w, 1386s, 1193s, 1115m; HRMS (ESI):  $m/z$  calcd for  $\text{C}_{17}\text{H}_{15}\text{IN}_2\text{O}_2\text{S}$   $[\text{M}+\text{H}]^+$ : 407.0251; found 407.0249. Spectral data are in agreement with literature values<sup>17</sup>.

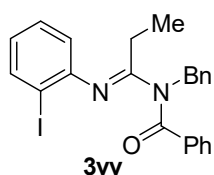

To an oven-dried sealed tube was added aniline **1a** (65.7 mg, 0.30 mmol), ynamide **2r** (62.4 mg, 0.25 mmol), DCE (0.625 mL, ynamide *concn* = 0.40 M), and TfOH (11.1  $\mu\text{L}$ , 0.125 mmol) at 30 °C. The reaction vessel was capped and stirred at 30 °C for 3.0 h. After the reaction was judged to be complete by TLC, the reaction mixture was cooled to rt, filtered through a pad of silica gel, concentrated in vacuo, and purified by flash silica gel column chromatography [gradient eluent: 40:1~35:1 petroleum ether/EtOAc] to afford *N*-arylimine **3vv** (84.9 mg, 0.18 mmol) in 73% yield.

**3vv**:  $R_f = 0.23$  [20:1 petroleum ether/EtOAc]; white solid; mp = 114–115 °C;  $^1\text{H NMR}$  (400 MHz,  $\text{CDCl}_3$ )  $\delta$  7.79-7.74 (m, 3H), 7.52 (d, 2H,  $J = 7.1$  Hz), 7.49-7.46 (m, 1H), 7.43-7.39 (m, 2H), 7.34-7.30 (m, 2H), 7.27-7.24 (m, 1H), 7.22-7.18 (m, 1H), 6.75-6.71 (m, 1H), 6.36 (dd, 1H,  $J = 7.9, 1.6$  Hz), 5.30 (s, 2H), 2.06 (q, 2H,  $J = 7.6$  Hz), 0.73 (t, 3H,  $J = 7.5$  Hz);  $^{13}\text{C NMR}$  (100 MHz,  $\text{CDCl}_3$ )  $\delta$  173.0, 163.9, 150.3, 139.1, 138.3, 136.9, 131.6, 129.0, 128.9, 128.8, 128.4, 127.4, 124.9, 119.5, 90.6, 52.1, 26.4, 10.7, one carbon missing due to overlap, overlapped signal at 128.4 ppm; IR (neat) ( $\text{cm}^{-1}$ ) 2931w, 1624s, 1576w, 1358s, 1304m, 1215s, 1144m; HRMS (ESI):  $m/z$  calcd for  $\text{C}_{23}\text{H}_{21}\text{IN}_2\text{O}$   $[\text{M}+\text{H}]^+$ : 469.0771; found 469.0769.

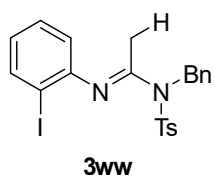

To an oven-dried sealed tube was added aniline **1a** (65.7 mg, 0.30 mmol), ynamide **2s**<sup>15</sup> (71.3 mg, 0.25 mmol), DCE (0.625 mL, ynamide *concn* = 0.40 M), and TfOH (11.1  $\mu\text{L}$ , 0.125 mmol) at 30 °C. The reaction vessel was capped and stirred at 30 °C for 3.0 h. After the reaction was judged to be complete by TLC, the reaction mixture was cooled to rt, filtered through a pad of silica gel,

concentrated in vacuo, and purified by flash silica gel column chromatography [gradient eluent: 30:1~20:1 petroleum ether/EtOAc] to afford *N*-arylimine **3ww** (124.3 mg, 0.25 mmol) in 99% yield.

**3ww**:  $R_f$  = 0.37 [10:1 petroleum ether/EtOAc]; colorless oil;  $^1\text{H}$  NMR (400 MHz,  $\text{CDCl}_3$ )  $\delta$  7.77-7.74 (m, 2H), 7.72 (dd, 1H,  $J$  = 8.0, 1.4 Hz), 7.49-7.46 (m, 2H), 7.34-7.25 (m, 5H), 7.19-7.15 (m, 1H), 6.72-6.68 (m, 1H), 6.30 (dd, 1H,  $J$  = 7.8, 1.6 Hz), 5.22 (s, 2H), 2.43 (s, 3H), 2.02 (s, 3H);  $^{13}\text{C}$  NMR (100 MHz,  $\text{CDCl}_3$ )  $\delta$  155.8, 150.4, 144.4, 139.1, 137.5, 137.3, 130.0, 129.2, 128.6, 128.5, 127.7, 127.5, 124.8, 120.1, 90.3, 51.0, 21.8, 19.6; IR (neat) ( $\text{cm}^{-1}$ ) 2920w, 1647s, 1460m, 1349s, 1259m, 1163s; HRMS (ESI):  $m/z$  calcd for  $\text{C}_{22}\text{H}_{21}\text{IN}_2\text{O}_2\text{S}$   $[\text{M}+\text{H}]^+$ : 505.0441; found 505.0439.

## 1.5 Condition Optimization of the Hydroamination with Secondary Amines (Table S2).

Table S2. Condition Optimization of the Hydroamination with Secondary Amines

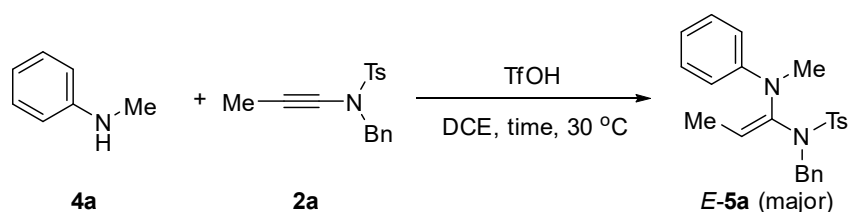

| entry <sup>a</sup> | equiv of TfOH | ynamide <i>concn</i> (M) | time (h) | yield (%) <sup>b</sup> | <i>E/Z</i> <sup>c</sup> |
|--------------------|---------------|--------------------------|----------|------------------------|-------------------------|
| 1                  | 0.5           | 0.4                      | 0.5      | 75                     | 11:1                    |
| 2                  | 1.0           | 0.4                      | 0.5      | 44                     | 11:1                    |
| 3                  | 0.2           | 0.4                      | 0.5      | 85                     | 11:1                    |
| 4                  | 0.2           | 0.2                      | 1.0      | 91                     | 11:1                    |

<sup>a</sup>Unless otherwise specified, reactions were carried out using **4a** (0.60 mmol), **2a** (0.50 mmol) with TfOH in DCE at 30 °C. <sup>b</sup>Isolated yields. <sup>c</sup>Determined by  $^1\text{H}$  NMR spectroscopy of unpurified reaction mixture.

To an oven-dried sealed tube was added secondary amine **4a** (64.3 mg, 0.60 mmol), ynamide **2a** (149.7 mg, 0.50 mmol), DCE (2.5 mL, ynamide *concn* = 0.20 M), and TfOH (8.9  $\mu\text{L}$ , 0.10 mmol) at 30 °C. The reaction vessel was capped and stirred at 30 °C for 1.0 h. After the reaction was judged to be complete by TLC, the reaction mixture was cooled to rt, filtered through a pad of silica gel and concentrated in vacuo. After the *E/Z* ratio of the crude product was confirmed by  $^1\text{H}$  NMR spectroscopy, the mixture was purified by flash silica gel column chromatography [gradient eluent: 35:1~30:1 petroleum ether/EtOAc] to afford a mixture of ethene-1,1-diamines *E*-5a and *Z*-5a.

## 1.6 Hydroamination of Ynamides with Secondary Amines (Table 4).

Ethene-1,1-diamines *E*-**5bb**<sup>19</sup>, *E*-**5dd**<sup>20</sup> and 3-alkenylindole (**5ll**)<sup>21</sup> were known compounds, the data were matched with reported values. Ethene-1,1-diamines **5a-5o**, **5q-5aa**, *Z*-**5bb**, **5cc**, **5ee-5kk** and 3-alkenylindoles (**5p**)', (**5mm**)' were new compounds.

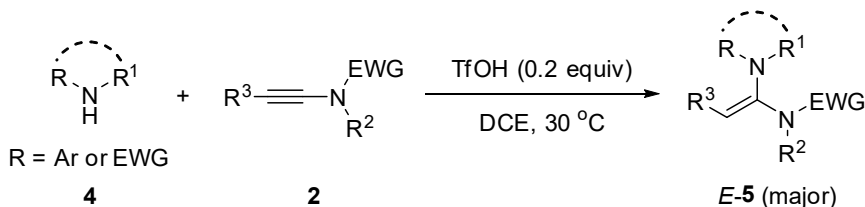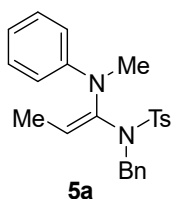

To an oven-dried sealed tube was added secondary amine **4a** (64.3 mg, 0.60 mmol), ynamide **2a** (149.7 mg, 0.50 mmol), DCE (2.5 mL, ynamide *concn* = 0.20 M), and TfOH (8.9  $\mu\text{L}$ , 0.10 mmol) at 30 °C. The reaction vessel was capped and stirred at 30 °C for 1.0 h. After the reaction was judged to be complete by TLC, the reaction mixture was cooled to rt, filtered through a pad of silica gel and concentrated in vacuo. After the *E/Z* ratio of the crude product was confirmed by <sup>1</sup>H NMR spectroscopy, the mixture was purified by flash silica gel column chromatography [gradient eluent: 35:1~30:1 petroleum ether/EtOAc] to afford a 11:1 mixture of ethene-1,1-diamines *E*-**5a** (169.8 mg, 0.42 mmol) and *Z*-**5a** (15.4 mg, 0.04 mmol) in 91% yield.

*E*-**5a**:  $R_f$  = 0.37 [10:1 petroleum ether/EtOAc]; colorless oil; <sup>1</sup>H NMR (400 MHz, CDCl<sub>3</sub>)  $\delta$  7.65-7.62 (m, 2H), 7.25-7.21 (m, 5H), 7.19-7.16 (m, 2H), 7.10-7.06 (m, 2H), 6.73-6.68 (m, 1H), 6.51 (dd, 2H,  $J$  = 8.9, 1.2 Hz), 5.19 (q, 1H,  $J$  = 7.0 Hz), 4.57 (s, 2H), 2.70 (s, 3H), 2.41 (s, 3H), 1.29 (d, 3H,  $J$  = 7.0 Hz); <sup>13</sup>C NMR (100 MHz, CDCl<sub>3</sub>)  $\delta$  146.4, 143.5, 138.0, 137.6, 137.2, 129.5, 128.9, 128.5, 128.4, 127.7, 127.6, 118.4, 115.1, 114.2, 51.7, 35.1, 21.7, 13.4; IR (neat) (cm<sup>-1</sup>) 2914w, 1658w, 1597s, 1498s, 1454m, 1346s, 1157m; HRMS (ESI):  $m/z$  calcd for C<sub>24</sub>H<sub>26</sub>N<sub>2</sub>O<sub>2</sub>S [M+H]<sup>+</sup>: 407.1788; found 407.1785.

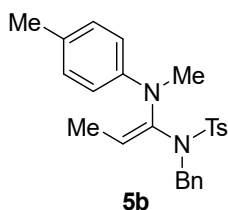

To an oven-dried sealed tube was added secondary amine **4b** (72.7 mg, 0.60 mmol), ynamide **2a** (149.7 mg, 0.50 mmol), DCE (2.5 mL, ynamide *concn* = 0.20 M), and TfOH (8.9  $\mu$ L, 0.10 mmol) at 30 °C. The reaction vessel was capped and stirred at 30 °C for 3.0 h. After the reaction was judged to be complete by TLC, the reaction mixture was cooled to rt, filtered through a pad of silica gel and concentrated in vacuo. After the *E/Z* ratio of the crude product was confirmed by <sup>1</sup>H NMR spectroscopy, the mixture was purified by flash silica gel column chromatography [gradient eluent: 50:1~40:1 petroleum ether/EtOAc] to afford a 11:1 mixture of ethene-1,1-diamines *E*-**5b** (178.1 mg, 0.42 mmol) and *Z*-**5b** (16.2 mg, 0.04 mmol) in 92% yield.

*E*-**5b**:  $R_f$  = 0.41 [10:1 petroleum ether/EtOAc]; colorless oil; <sup>1</sup>H NMR (400 MHz, CDCl<sub>3</sub>)  $\delta$  7.64-7.61 (m, 2H), 7.25-7.19 (m, 7H), 6.89 (dd, 2H,  $J$  = 8.8, 0.8 Hz), 6.46-6.42 (m, 2H), 5.13 (q, 1H,  $J$  = 7.0 Hz), 4.57 (s, 2H), 2.68 (s, 3H), 2.40 (s, 3H), 2.21 (s, 3H), 1.27 (d, 3H,  $J$  = 7.0 Hz); <sup>13</sup>C NMR (100 MHz, CDCl<sub>3</sub>)  $\delta$  144.2, 143.4, 138.0, 137.8, 137.2, 129.5, 129.4, 128.41, 128.39, 127.7, 127.50, 127.49, 114.4, 114.3, 51.6, 35.1, 21.7, 20.5, 13.3; IR (neat) (cm<sup>-1</sup>) 2922w, 1657w, 1514s, 1454m, 1344s, 1158s, 1090m; HRMS (ESI):  $m/z$  calcd for C<sub>25</sub>H<sub>28</sub>N<sub>2</sub>O<sub>2</sub>S [M+Na]<sup>+</sup>: 443.1764; found 443.1761.

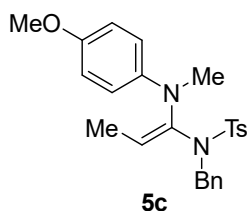

To an oven-dried sealed tube was added secondary amine **4c** (82.3 mg, 0.60 mmol), ynamide **2a** (149.7 mg, 0.50 mmol), DCE (2.5 mL, ynamide *concn* = 0.20 M), and TfOH (8.9  $\mu$ L, 0.10 mmol) at 30 °C. The reaction vessel was capped and stirred at 30 °C for 8.5 h. After the reaction was judged to be complete by TLC, the reaction mixture was cooled to rt, filtered through a pad of silica gel and concentrated in vacuo. After the *E/Z* ratio of the crude product was confirmed by <sup>1</sup>H NMR spectroscopy, the mixture was purified by flash silica gel column chromatography [gradient eluent: 40:1~30:1 petroleum ether/EtOAc] to afford a 5:1 mixture of ethene-1,1-diamines *E*-**5c** (164.0 mg, 0.38 mmol) and *Z*-**5c** (32.8 mg, 0.08 mmol) in 90% yield.

*E*-**5c** and *Z*-**5c**:  $R_f$  = 0.30 [10:1 petroleum ether/EtOAc]; colorless oil; <sup>1</sup>H NMR (400 MHz, CDCl<sub>3</sub>)  $\delta$  7.64 (d, 2.0H,  $J$  = 8.4 Hz, major), 7.59 (d, 0.4H,  $J$  = 8.4 Hz, minor), 7.26-7.24 (m, 5.0H), 7.21-7.16 (m, 3.4H), 6.85-6.81 (m, 0.4H, minor), 6.73-6.70 (m, 0.4H, minor), 6.68-6.64 (m, 2.0H, major), 6.49-6.45 (m, 2.0H, major), 5.07 (q, 1.0H,  $J$  = 7.0 Hz, major), 4.86 (q, 0.2H,  $J$  = 7.0 Hz, minor), 4.57 (s, 2.0H, major), 4.44 (s, 0.4H, minor), 3.75 (s, 0.6H, minor), 3.72 (s, 3.0H, major), 2.66 (s, 3.0H, major), 2.59 (s, 0.6H, minor), 2.41 (s, 3.0H, major), 2.39 (s, 0.6H, minor), 1.54 (d, 0.6H,  $J$  = 7.1 Hz,

minor), 1.26 (d, 3.0H,  $J = 7.0$  Hz, major);  $^{13}\text{C}$  NMR (100 MHz,  $\text{CDCl}_3$ ) (*E*-**5c**, major):  $\delta$  152.5, 143.4, 140.7, 138.2, 138.0, 137.2, 129.49, 128.4, 127.7, 127.5, 115.8, 114.3, 113.4, 55.7, 51.8, 35.5, 21.7, 13.3, one carbon missing due to overlap, overlapped signal at 128.4 ppm; (*Z*-**5c**, minor):  $\delta$  155.0, 143.3, 142.3, 141.3, 137.8, 136.2, 129.54, 129.4, 128.3, 128.0, 127.8, 122.4, 114.2, 112.0, 55.6, 51.9, 39.0, 21.6, 13.9; IR (neat) ( $\text{cm}^{-1}$ ) 2927w, 1660w, 1509s, 1343m, 1243m, 1157s; HRMS (ESI):  $m/z$  calcd for  $\text{C}_{25}\text{H}_{28}\text{N}_2\text{O}_3\text{S}$   $[\text{M}+\text{Na}]^+$ : 459.1713; found 459.1712.

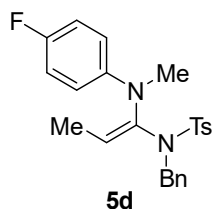

To an oven-dried sealed tube was added secondary amine **4d** (75.1 mg, 0.60 mmol), ynamide **2a** (149.7 mg, 0.50 mmol), DCE (2.5 mL, ynamide *concn* = 0.20 M), and TfOH (8.9  $\mu\text{L}$ , 0.10 mmol) at 80 °C. The reaction vessel was capped and stirred at 80 °C for 1.0 h. After the reaction was judged to be complete by TLC, the reaction mixture was cooled to rt, filtered through a pad of silica gel and concentrated in vacuo. After the *E/Z* ratio of the crude product was confirmed by  $^1\text{H}$  NMR spectroscopy, the mixture was purified by flash silica gel column chromatography [gradient eluent: 40:1~25:1 petroleum ether/EtOAc] to afford a 9:1 mixture of ethene-1,1-diamines *E*-**5d** (180.6 mg, 0.43 mmol) and *Z*-**5d** (20.1 mg, 0.05 mmol) in 95% yield.

*E*-**5d** and *Z*-**5d**:  $R_f = 0.37$  [10:1 petroleum ether/EtOAc]; colorless oil;  $^1\text{H}$  NMR (400 MHz,  $\text{CDCl}_3$ )  $\delta$  7.67-7.63 (m, 2.2H), 7.27 (d, 0.2H,  $J = 2.2$  Hz, minor), 7.26-7.22 (m, 5.6H), 7.17-7.15 (m, 2.0H, major), 6.83-6.80 (m, 0.2H, minor), 6.79-6.73 (m, 2.2H), 6.43-6.40 (m, 2.0H, major), 5.13 (q, 1.0H,  $J = 7.0$  Hz, major), 4.95 (q, 0.1H,  $J = 7.1$  Hz, minor), 4.57 (s, 2.0H, major), 4.47 (s, 0.2H, minor), 2.65 (s, 3.0H, major), 2.57 (s, 0.3H, minor), 2.41 (s, 3.0H, major), 2.40 (s, 0.3H, minor), 1.59 (d, 0.3H,  $J = 7.1$  Hz, minor), 1.27 (d, 3.0H,  $J = 7.0$  Hz, major);  $^{13}\text{C}$  NMR (100 MHz,  $\text{CDCl}_3$ ) (*E*-**5d**, major):  $\delta$  156.2 (d,  $J = 235.3$  Hz), 143.6, 142.8 (d,  $J = 2.0$  Hz), 137.9 (d,  $J = 11.3$  Hz), 136.9, 129.6, 128.5, 128.41, 127.7, 127.6, 115.26, 115.23 (d,  $J = 21.7$  Hz), 114.5, 52.00, 35.5, 21.68, 13.3, one carbon missing due to overlap, overlapped signal at 115.34 ppm; (*Z*-**5d**, minor):  $\delta$  157.8 (d,  $J = 238.3$  Hz), 144.9 (d,  $J = 2.4$  Hz), 140.9, 137.7, 136.1, 129.4, 128.38, 128.1, 128.0, 127.8, 120.9 (d,  $J = 7.7$  Hz), 115.30 (d,  $J = 22.1$  Hz), 114.1, 51.96, 37.9, 21.66, 14.0, one carbon missing due to overlap, overlapped signal at 115.34 ppm; IR (neat) ( $\text{cm}^{-1}$ ) 2939w, 1658w, 1507s, 1453w, 1343s, 1221m, 1159s, 1056m; HRMS (ESI):  $m/z$  calcd for  $\text{C}_{24}\text{H}_{25}\text{FN}_2\text{O}_2\text{S}$   $[\text{M}+\text{H}]^+$ : 425.1694; found 425.1695.



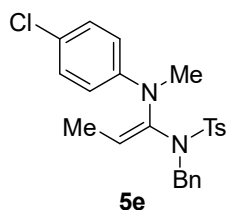

To an oven-dried sealed tube was added secondary amine **4e** (84.6 mg, 0.60 mmol), ynamide **2a** (149.7 mg, 0.50 mmol), DCE (2.5 mL, ynamide *concn* = 0.20 M), and TfOH (8.9  $\mu$ L, 0.10 mmol) at 80 °C. The reaction vessel was capped and stirred at 80 °C for 1.0 h. After the reaction was judged to be complete by TLC, the reaction mixture was cooled to rt, filtered through a pad of silica gel and concentrated in vacuo. After the *E/Z* ratio of the crude product was confirmed by  $^1\text{H}$  NMR spectroscopy, the mixture was purified by flash silica gel column chromatography [gradient eluent: 40:1~25:1 petroleum ether/EtOAc] to afford a 10:1 mixture of ethene-1,1-diamines *E*-**5e** (190.1 mg, 0.43 mmol) and *Z*-**5e** (19.0 mg, 0.04 mmol) in 95% yield.

*E*-**5e**:  $R_f$  = 0.32 [10:1 petroleum ether/EtOAc]; colorless oil;  $^1\text{H}$  NMR (400 MHz,  $\text{CDCl}_3$ )  $\delta$  7.66-7.63 (m, 2H), 7.25-7.22 (m, 5H), 7.17-7.14 (m, 2H), 7.01-6.97 (m, 2H), 6.41-6.37 (m, 2H), 5.18 (q, 1H,  $J$  = 7.0 Hz), 4.57 (s, 2H), 2.63 (s, 3H), 2.40 (s, 3H), 1.26 (d, 3H,  $J$  = 7.0 Hz);  $^{13}\text{C}$  NMR (100 MHz,  $\text{CDCl}_3$ )  $\delta$  144.9, 143.7, 137.7, 137.3, 136.8, 129.6, 128.6, 128.5, 128.4, 127.64, 127.58, 123.0, 115.2, 52.0, 35.1, 21.6, 13.3, one carbon missing due to overlap, overlapped signal at 128.5 ppm; IR (neat) ( $\text{cm}^{-1}$ ) 3035w, 1595m, 1493s, 1344s, 1211w, 1157s; HRMS (ESI):  $m/z$  calcd for  $\text{C}_{24}\text{H}_{25}\text{ClN}_2\text{O}_2\text{S}$  [ $\text{M}+\text{H}$ ] $^+$ : 441.1398; found 441.1391.

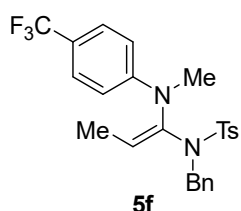

To an oven-dried sealed tube was added secondary amine **4f** (105.1 mg, 0.60 mmol), ynamide **2a** (149.7 mg, 0.50 mmol), DCE (2.5 mL, ynamide *concn* = 0.20 M), and TfOH (8.9  $\mu$ L, 0.10 mmol) at 80 °C. The reaction vessel was capped and stirred at 80 °C for 1.0 h. After the reaction was judged to be complete by TLC, the reaction mixture was cooled to rt, filtered through a pad of silica gel and concentrated in vacuo. After the *E/Z* ratio of the crude product was confirmed by  $^1\text{H}$  NMR spectroscopy, the mixture was purified by flash silica gel column chromatography [gradient eluent: 35:1~25:1 petroleum ether/EtOAc] to afford a 13:1 mixture of ethene-1,1-diamines *E*-**5f** (212.7 mg, 0.45 mmol) and *Z*-**5f** (16.4 mg, 0.03 mmol) in 97% yield.

*E*-**5f**:  $R_f$  = 0.32 [10:1 petroleum ether/EtOAc]; white solid; mp = 89–90 °C;  $^1\text{H}$  NMR (400 MHz,  $\text{CDCl}_3$ )  $\delta$  7.65 (d, 2H,  $J$  = 8.3 Hz), 7.28 (d, 2H,  $J$  = 8.7 Hz), 7.24-7.22 (m, 5H), 7.16-7.14 (m, 2H),

6.48 (d, 2H,  $J = 8.7$  Hz), 5.29 (q, 1H,  $J = 7.0$  Hz), 4.59 (s, 2H), 2.70 (s, 3H), 2.39 (s, 3H), 1.29 (d, 3H,  $J = 7.0$  Hz);  $^{13}\text{C}$  NMR (100 MHz,  $\text{CDCl}_3$ )  $\delta$  148.8, 143.8, 137.6, 136.9, 136.6, 129.6, 128.5, 128.3, 127.7, 127.5, 126.1 (q,  $J = 3.7$  Hz), 125.0 (q,  $J = 268.7$  Hz), 119.7 (q,  $J = 32.3$  Hz), 116.5, 113.2, 52.3, 35.1, 21.6, 13.3; IR (neat) ( $\text{cm}^{-1}$ ) 2941w, 1614m, 1495w, 1322s, 1154s, 1090m; HRMS (ESI):  $m/z$  calcd for  $\text{C}_{25}\text{H}_{25}\text{F}_3\text{N}_2\text{O}_2\text{S}$   $[\text{M}+\text{H}]^+$ : 475.1662; found 475.1659.

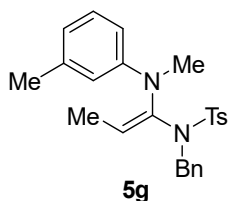

To an oven-dried sealed tube was added secondary amine **4g** (72.7 mg, 0.60 mmol), ynamide **2a** (149.7 mg, 0.50 mmol), DCE (2.5 mL, ynamide *concn* = 0.20 M), and TfOH (8.9  $\mu\text{L}$ , 0.10 mmol) at 30 °C. The reaction vessel was capped and stirred at 30 °C for 1.0 h. After the reaction was judged to be complete by TLC, the reaction mixture was cooled to rt, filtered through a pad of silica gel and concentrated in vacuo. After the *E/Z* ratio of the crude product was confirmed by  $^1\text{H}$  NMR spectroscopy, the mixture was purified by flash silica gel column chromatography [gradient eluent: 40:1~35:1 petroleum ether/EtOAc] to afford a 12:1 mixture of ethene-1,1-diamines *E*-**5g** (169.5 mg, 0.40 mmol) and *Z*-**5g** (14.1 mg, 0.03 mmol) in 87% yield.

*E*-**5g**:  $R_f = 0.41$  [10:1 petroleum ether/EtOAc]; colorless oil;  $^1\text{H}$  NMR (400 MHz,  $\text{CDCl}_3$ )  $\delta$  7.67-7.64 (m, 2H), 7.23-7.20 (m, 5H), 7.17-7.15 (m, 2H), 6.97 (t, 1H,  $J = 7.8$  Hz), 6.52 (d, 1H,  $J = 7.3$  Hz), 6.34 (dd, 1H,  $J = 8.3, 2.6$  Hz), 6.25 (t, 1H,  $J = 2.0$  Hz), 5.20 (q, 1H,  $J = 6.9$  Hz), 4.57 (s, 2H), 2.70 (s, 3H), 2.38 (s, 3H), 2.14 (s, 3H), 1.28 (d, 3H,  $J = 7.0$  Hz);  $^{13}\text{C}$  NMR (100 MHz,  $\text{CDCl}_3$ )  $\delta$  146.4, 143.4, 138.4, 137.9, 137.4, 137.1, 129.5, 128.6, 128.32, 128.28, 127.6, 127.4, 119.2, 115.3, 115.0, 111.2, 51.4, 35.0, 21.8, 21.6, 13.3; IR (neat) ( $\text{cm}^{-1}$ ) 2918w, 1601m, 1579w, 1491m, 1349s, 1157s, 1054m; HRMS (ESI):  $m/z$  calcd for  $\text{C}_{25}\text{H}_{28}\text{N}_2\text{O}_2\text{S}$   $[\text{M}+\text{Na}]^+$ : 443.1764; found 443.1761.

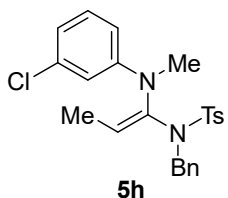

To an oven-dried sealed tube was added secondary amine **4h** (85.0 mg, 0.60 mmol), ynamide **2a** (149.7 mg, 0.50 mmol), DCE (2.5 mL, ynamide *concn* = 0.20 M), and TfOH (8.9  $\mu\text{L}$ , 0.10 mmol) at 30 °C. The reaction vessel was capped and stirred at 30 °C for 1.0 h. After the reaction was judged to be complete by TLC, the reaction mixture was cooled to rt, filtered through a pad of silica gel and concentrated in vacuo. After the *E/Z* ratio of the crude product was confirmed by  $^1\text{H}$  NMR spectroscopy, the mixture was purified by flash silica gel column chromatography [gradient eluent:

35:1~30:1 petroleum ether/EtOAc] to afford a 11:1 mixture of ethene-1,1-diamines *E*-**5h** (176.3 mg, 0.40 mmol) and *Z*-**5h** (16.0 mg, 0.04 mmol) in 87% yield.

*E*-**5h**:  $R_f$  = 0.43 [10:1 petroleum ether/EtOAc]; colorless oil;  $^1\text{H}$  NMR (400 MHz,  $\text{CDCl}_3$ )  $\delta$  7.68-7.64 (m, 2H), 7.25-7.23 (m, 5H), 7.16-7.14 (m, 2H), 6.96 (t, 1H,  $J$  = 8.0 Hz), 6.65 (dd, 1H,  $J$  = 7.8, 1.1 Hz), 6.39-6.34 (m, 2H), 5.22 (q, 1H,  $J$  = 7.0 Hz), 4.57 (s, 2H), 2.68 (s, 3H), 2.41 (s, 3H), 1.29 (d, 3H,  $J$  = 7.0 Hz);  $^{13}\text{C}$  NMR (100 MHz,  $\text{CDCl}_3$ )  $\delta$  147.5, 143.7, 137.7, 137.0, 136.7, 134.7, 129.8, 129.6, 128.5, 128.4, 127.7, 127.6, 118.2, 116.1, 113.9, 112.1, 52.1, 35.1, 21.7, 13.3; IR (neat) ( $\text{cm}^{-1}$ ) 2925w, 1651w, 1593m, 1484m, 1344s, 1259w, 1163s, 1038m; HRMS (ESI):  $m/z$  calcd for  $\text{C}_{24}\text{H}_{25}\text{ClN}_2\text{O}_2\text{S}$  [ $\text{M}+\text{Na}$ ] $^+$ : 463.1217; found 463.1214.

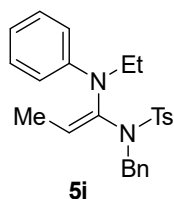

To an oven-dried sealed tube was added secondary amine **4i** (72.7 mg, 0.60 mmol), ynamide **2a** (149.7 mg, 0.50 mmol), DCE (2.5 mL, ynamide *concn* = 0.20 *M*), and TfOH (8.9  $\mu\text{L}$ , 0.10 mmol) at 30 °C. The reaction vessel was capped and stirred at 30 °C for 3.0 h. After the reaction was judged to be complete by TLC, the reaction mixture was cooled to rt, filtered through a pad of silica gel and concentrated in vacuo. After the *E/Z* ratio of the crude product was confirmed by  $^1\text{H}$  NMR spectroscopy, the mixture was purified by flash silica gel column chromatography [gradient eluent: 50:1~40:1 petroleum ether/EtOAc] to afford a 15:1 mixture of ethene-1,1-diamines *E*-**5i** (170.5 mg, 0.41 mmol) and *Z*-**5i** (11.4 mg, 0.03 mmol) in 87% yield.

*E*-**5i**:  $R_f$  = 0.42 [10:1 petroleum ether/EtOAc]; white solid; mp = 86–87 °C;  $^1\text{H}$  NMR (400 MHz,  $\text{CDCl}_3$ )  $\delta$  7.68-7.64 (m, 2H), 7.24-7.19 (m, 7H), 7.06-7.02 (m, 2H), 6.65 (t, 1H,  $J$  = 7.2 Hz), 6.51 (dd, 2H,  $J$  = 9.0, 1.2 Hz), 5.29 (q, 1H,  $J$  = 7.0 Hz), 4.59 (s, 2H), 3.10 (q, 2H,  $J$  = 7.0 Hz), 2.38 (s, 3H), 1.24 (d, 3H,  $J$  = 7.0 Hz), 0.88 (t, 3H,  $J$  = 7.0 Hz);  $^{13}\text{C}$  NMR (100 MHz,  $\text{CDCl}_3$ )  $\delta$  145.4, 143.4, 137.7, 137.2, 135.7, 129.4, 128.9, 128.4, 128.3, 127.7, 127.4, 117.9, 116.4, 113.8, 51.2, 40.6, 21.5, 13.5, 12.0; IR (neat) ( $\text{cm}^{-1}$ ) 2933w, 1595m, 1496m, 1338s, 1209w, 1151s; HRMS (ESI):  $m/z$  calcd for  $\text{C}_{25}\text{H}_{28}\text{N}_2\text{O}_2\text{S}$  [ $\text{M}+\text{Na}$ ] $^+$ : 443.1764; found 443.1763.

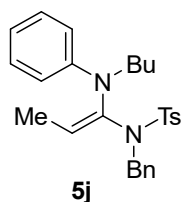

To an oven-dried sealed tube was added secondary amine **4j** (89.5 mg, 0.60 mmol), ynamide **2a** (149.7 mg, 0.50 mmol), DCE (2.5 mL, ynamide *concn* = 0.20 *M*), and TfOH (8.9  $\mu\text{L}$ , 0.10 mmol) at

30 °C. The reaction vessel was capped and stirred at 30 °C for 4.5 h. After the reaction was judged to be complete by TLC, the reaction mixture was cooled to rt, filtered through a pad of silica gel and concentrated in vacuo. After the *E/Z* ratio of the crude product was confirmed by <sup>1</sup>H NMR spectroscopy, the mixture was purified by flash silica gel column chromatography [gradient eluent: 50:1~40:1 petroleum ether/EtOAc] to afford a 18:1 mixture of ethene-1,1-diamines *E*-**5j** (186.3 mg, 0.42 mmol) and *Z*-**5j** (10.3 mg, 0.02 mmol) in 88% yield.

*E*-**5j**:  $R_f$  = 0.49 [10:1 petroleum ether/EtOAc]; colorless oil; <sup>1</sup>H NMR (400 MHz, CDCl<sub>3</sub>)  $\delta$  7.68-7.65 (m, 2H), 7.24-7.19 (m, 7H), 7.05-7.01 (m, 2H), 6.66-6.62 (m, 1H), 6.48 (dd, 2H,  $J$  = 9.0, 1.1 Hz), 5.34 (q, 1H,  $J$  = 7.0 Hz), 4.59 (s, 2H), 3.00-2.96 (m, 2H), 2.38 (s, 3H), 1.29-1.22 (m, 5H), 1.13-1.04 (m, 2H), 0.86 (t, 3H,  $J$  = 7.2 Hz); <sup>13</sup>C NMR (100 MHz, CDCl<sub>3</sub>)  $\delta$  145.6, 143.5, 137.7, 137.2, 135.8, 129.4, 128.8, 128.4, 128.3, 127.8, 127.4, 117.8, 116.2, 113.7, 51.1, 46.1, 29.0, 21.5, 20.1, 14.0, 13.6; IR (neat) (cm<sup>-1</sup>) 2927w, 1658w, 1597m, 1496s, 1342m, 1159s, 1090s; HRMS (ESI):  $m/z$  calcd for C<sub>27</sub>H<sub>32</sub>N<sub>2</sub>O<sub>2</sub>S [M+Na]<sup>+</sup>: 471.2077; found 471.2073.

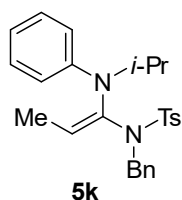

To an oven-dried sealed tube was added secondary amine **4k** (81.1 mg, 0.60 mmol), ynamide **2a** (149.7 mg, 0.50 mmol), DCE (2.5 mL, ynamide *concn* = 0.20 M), and TfOH (8.9  $\mu$ L, 0.10 mmol) at 80 °C. The reaction vessel was capped and stirred at 80 °C for 1.0 h. After the reaction was judged to be complete by TLC, the reaction mixture was cooled to rt, filtered through a pad of silica gel and concentrated in vacuo. After the *E/Z* ratio of the crude product was confirmed by <sup>1</sup>H NMR spectroscopy, the mixture was purified by flash silica gel column chromatography [gradient eluent: 50:1~40:1 petroleum ether/EtOAc] to afford a 3:1 mixture of ethene-1,1-diamines *E*-**5k** (145.3 mg, 0.33 mmol) and *Z*-**5k** (48.4 mg, 0.11 mmol) in 89% yield.

*E*-**5k** and *Z*-**5k**:  $R_f$  = 0.37 [10:1 petroleum ether/EtOAc]; colorless oil; <sup>1</sup>H NMR (400 MHz, CDCl<sub>3</sub>)  $\delta$  7.63-7.60 (m, 2.0H, major), 7.28-7.23 (m, 8.0H), 7.21-7.18 (m, 2.7H), 7.09-7.06 (m, 1.0H, major), 7.04-6.99 (m, 2.3H), 6.71-6.67 (m, 2.7H), 5.09 (q, 1.0H,  $J$  = 7.0 Hz, major), 4.94 (q, 0.3H,  $J$  = 7.0 Hz, minor), 4.65 (s, 2.0H, major), 4.30 (s, 0.7H, minor), 3.81-3.74 (m, 1.0H, major), 3.66-3.59 (m, 0.3H, minor), 2.37 (s, 3.0H, major), 2.32 (s, 1.0H, minor), 1.53 (d, 1.0H,  $J$  = 7.0 Hz, minor), 1.23 (d, 3.0H,  $J$  = 7.1 Hz, major), 1.17 (d, 6.0H,  $J$  = 7.0 Hz, major), 0.99 (d, 2.0H,  $J$  = 6.5 Hz, minor); <sup>13</sup>C NMR (100 MHz, CDCl<sub>3</sub>) (*E*-**5k**, major):  $\delta$  145.3, 143.3, 138.8, 137.8, 137.5, 129.4, 128.5, 128.4, 128.2, 127.84, 127.3, 119.2, 119.0, 114.0, 50.8, 48.4, 21.53, 20.2, 13.2; (*Z*-**5k**, minor):  $\delta$  143.7, 142.9, 140.8, 137.4, 136.3, 129.27, 129.25, 128.71, 128.66, 128.1, 127.80, 127.7, 125.0, 109.6, 51.5,

51.2, 21.47, 13.8, one carbon missing due to overlap, overlapped signal at 20.2 ppm; IR (neat) ( $\text{cm}^{-1}$ ) 2978w, 1595m, 1493m, 1312s, 1269w, 1150s; HRMS (ESI):  $m/z$  calcd for  $\text{C}_{26}\text{H}_{30}\text{N}_2\text{O}_2\text{S}$   $[\text{M}+\text{H}]^+$ : 435.2101; found 435.2100.

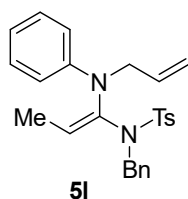

To an oven-dried sealed tube was added secondary amine **4I** (79.9 mg, 0.60 mmol), ynamide **2a** (149.7 mg, 0.50 mmol), DCE (2.5 mL, ynamide *concn* = 0.20 M), and TfOH (8.9  $\mu\text{L}$ , 0.10 mmol) at 30 °C. The reaction vessel was capped and stirred at 30 °C for 3.0 h. After the reaction was judged to be complete by TLC, the reaction mixture was cooled to rt, filtered through a pad of silica gel and concentrated in vacuo. After the *E/Z* ratio of the crude product was confirmed by  $^1\text{H}$  NMR spectroscopy, the mixture was purified by flash silica gel column chromatography [gradient eluent: 50:1~40:1 petroleum ether/EtOAc] to afford a 9:1 mixture of ethene-1,1-diamines *E*-**5I** (161.5 mg, 0.37 mmol) and *Z*-**5I** (17.9 mg, 0.04 mmol) in 83% yield.

*E*-**5I** and *Z*-**5I**:  $R_f$  = 0.42 [10:1 petroleum ether/EtOAc]; colorless oil;  $^1\text{H}$  NMR (400 MHz,  $\text{CDCl}_3$ )  $\delta$  7.65-7.62 (m, 2.2H), 7.25-7.18 (m, 8.0H), 7.08-7.03 (m, 2.0H, major), 6.85 (dd, 0.2H,  $J$  = 8.9, 1.2 Hz, minor), 6.79-6.75 (m, 0.1H, minor), 6.70-6.66 (m, 1.0H, major), 6.59 (dd, 2.0H,  $J$  = 8.9, 1.1 Hz, major), 5.70-5.63 (m, 0.1H, minor), 5.62-5.53 (m, 1.0H, major), 5.24 (q, 0.1H,  $J$  = 7.1 Hz, minor), 5.18 (q, 1.0H,  $J$  = 7.0 Hz, major), 5.14-5.02 (m, 2.2H), 4.58 (s, 2.0H, major), 4.45 (s, 0.2H, minor), 3.70-3.67 (m, 2.0H, major), 3.57-3.55 (m, 0.2H, minor), 2.38 (s, 3.0H, major), 2.36 (s, 0.3H, minor), 1.62 (d, 0.3H,  $J$  = 7.1 Hz, minor), 1.27 (d, 3.0H,  $J$  = 7.1 Hz, major);  $^{13}\text{C}$  NMR (100 MHz,  $\text{CDCl}_3$ ) (*E*-**5I**, major):  $\delta$  145.9, 143.5, 137.6, 137.0, 136.4, 134.4, 129.5, 128.8, 128.6, 128.4, 127.75, 127.5, 118.5, 116.4, 115.9, 114.8, 51.8, 49.4, 21.58, 13.7; (*Z*-**5I**, minor):  $\delta$  147.7, 144.2, 138.9, 137.5, 136.3, 134.3, 129.4, 129.3, 128.6, 128.3, 127.79, 127.69, 120.0, 118.3, 117.1, 116.7, 52.0, 50.4, 21.56, 14.1; IR (neat) ( $\text{cm}^{-1}$ ) 3035w, 1653w, 1597m, 1497s, 1362m, 1343s, 1156s, 1090m; HRMS (ESI):  $m/z$  calcd for  $\text{C}_{26}\text{H}_{28}\text{N}_2\text{O}_2\text{S}$   $[\text{M}+\text{Na}]^+$ : 455.1764; found 455.1763.

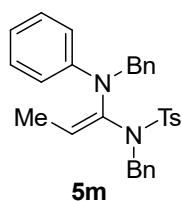

To an oven-dried sealed tube was added secondary amine **4m** (110.0 mg, 0.60 mmol), ynamide **2a** (149.7 mg, 0.50 mmol), DCE (2.5 mL, ynamide *concn* = 0.20 M), and TfOH (8.9  $\mu\text{L}$ , 0.10 mmol) at 30 °C. The reaction vessel was capped and stirred at 30 °C for 1.0 h. After the reaction was judged to

be complete by TLC, the reaction mixture was cooled to rt, filtered through a pad of silica gel and concentrated in vacuo. After the *E/Z* ratio of the crude product was confirmed by <sup>1</sup>H NMR spectroscopy, the mixture was purified by flash silica gel column chromatography [gradient eluent: 40:1~35:1 petroleum ether/EtOAc] to afford a 4:1 mixture of ethene-1,1-diamines *E*-**5m** (180.4 mg, 0.37 mmol) and *Z*-**5m** (45.1 mg, 0.09 mmol) in 93% yield.

*E*-**5m** and *Z*-**5m**: *R<sub>f</sub>* = 0.34 [10:1 petroleum ether/EtOAc]; colorless oil; <sup>1</sup>H NMR (400 MHz, CDCl<sub>3</sub>) δ 7.63-7.60 (m, 2.0H, major), 7.57-7.55 (m, 0.5H, minor), 7.22-7.13 (m, 10.0H), 7.08-7.03 (m, 5.0H), 7.02-6.96 (m, 2.5H), 6.84 (dd, 0.5H, *J* = 9.0, 1.3 Hz, minor), 6.74-6.70 (m, 0.2H, minor), 6.68-6.64 (m, 1.0H, major), 6.56 (dd, 2.0H, *J* = 9.0, 1.2 Hz, major), 5.45 (q, 0.2H, *J* = 7.1 Hz, minor), 5.28 (q, 1.0H, *J* = 7.1 Hz, major), 4.58 (s, 2.0H, major), 4.44 (s, 0.5H, minor), 4.27 (s, 2.0H, major), 4.10 (s, 0.5H, minor), 2.30 (s, 0.8H, minor), 2.26 (s, 3.0H, major), 1.62 (d, 0.8H, *J* = 7.1 Hz, minor), 1.36 (d, 3.0H, *J* = 7.1 Hz, major); <sup>13</sup>C NMR (100 MHz, CDCl<sub>3</sub>) (*E*-**5m**, major): δ 146.2, 143.6, 139.5, 137.0, 136.7, 136.4, 129.49, 128.70, 128.65, 128.37, 128.33, 127.73, 127.6, 126.6, 126.4, 118.8, 116.0, 115.1, 51.9, 51.0, 21.6, 14.1; (*Z*-**5m**, minor): δ 148.1, 143.5, 139.0, 138.8, 137.4, 136.1, 129.7, 129.46, 129.38, 128.41, 128.27, 128.0, 127.9, 127.68, 126.7, 119.9, 117.78, 117.75, 52.2, 51.6, 21.7, 14.2; IR (neat) (cm<sup>-1</sup>) 2920w, 1595m, 1496m, 1336s, 1234w, 1149s, 1089m; HRMS (ESI): *m/z* calcd for C<sub>30</sub>H<sub>30</sub>N<sub>2</sub>O<sub>2</sub>S [M+H]<sup>+</sup>: 483.2101; found 483.2102.

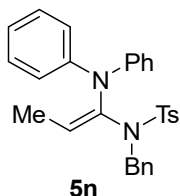

To an oven-dried sealed tube was added secondary amine **4n** (101.6 mg, 0.60 mmol), ynamide **2a** (149.7 mg, 0.50 mmol), DCE (2.5 mL, ynamide *concn* = 0.20 M), and TfOH (8.9 μL, 0.10 mmol) at 30 °C. The reaction vessel was capped and stirred at 30 °C for 1.0 h. After the reaction was judged to be complete by TLC, the reaction mixture was cooled to rt, filtered through a pad of silica gel and concentrated in vacuo. After the *E/Z* ratio of the crude product was confirmed by <sup>1</sup>H NMR spectroscopy, the mixture was purified by flash silica gel column chromatography [gradient eluent: 40:1~35:1 petroleum ether/EtOAc] to afford a 5:1 mixture of ethene-1,1-diamines *E*-**5n** (185.6 mg, 0.40 mmol) and *Z*-**5n** (37.1 mg, 0.08 mmol) in 95% yield.

*E*-**5n** and *Z*-**5n**: *R<sub>f</sub>* = 0.40 [10:1 petroleum ether/EtOAc]; colorless oil; <sup>1</sup>H NMR (400 MHz, CDCl<sub>3</sub>) δ 7.37-7.34 (m, 2.0H, major), 7.26-7.20 (m, 5.4H), 7.17-7.06 (m, 7.8H), 7.02-6.98 (m, 0.8H, minor), 6.95-6.90 (m, 2.0H, major), 6.83 (dd, 0.8H, *J* = 8.8, 1.4 Hz, minor), 6.74 (dd, 4.0H, *J* = 8.5, 1.2 Hz, major), 5.45 (q, 1.2H, *J* = 7.0 Hz), 4.46 (s, 2.4H), 2.35 (s, 3.0H, major), 2.31 (s, 0.6H, minor), 1.80 (d, 0.6H, *J* = 7.1 Hz, minor), 1.35 (d, 3.0H, *J* = 7.1 Hz, major); <sup>13</sup>C NMR (100 MHz, CDCl<sub>3</sub>) (*E*-**5n**,

major):  $\delta$  144.8, 143.23, 137.1, 137.0, 136.0, 129.4, 129.1, 128.5, 128.2, 127.87, 127.4, 122.7, 122.4, 116.4, 51.5, 21.55, 13.5; (*Z*-**5n**, minor):  $\delta$  146.6, 143.16, 139.0, 137.2, 136.5, 129.3, 129.2, 128.9, 128.3, 127.88, 127.82, 123.7, 123.2, 120.7, 52.0, 21.50, 14.4; IR (neat) ( $\text{cm}^{-1}$ ) 2927w, 1660w, 1588m, 1491s, 1342s, 1155s, 1090m; HRMS (ESI):  $m/z$  calcd for  $\text{C}_{29}\text{H}_{28}\text{N}_2\text{O}_2\text{S}$   $[\text{M}+\text{H}]^+$ : 469.1944; found 469.1945.

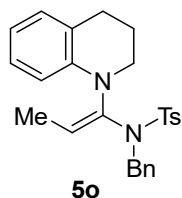

To an oven-dried sealed tube was added secondary amine **4o** (79.9 mg, 0.60 mmol), ynamide **2a** (149.7 mg, 0.50 mmol), DCE (2.5 mL, ynamide *concn* = 0.20 M), and TfOH (8.9  $\mu\text{L}$ , 0.10 mmol) at 30 °C. The reaction vessel was capped and stirred at 30 °C for 1.0 h. After the reaction was judged to be complete by TLC, the reaction mixture was cooled to rt, filtered through a pad of silica gel and concentrated in vacuo. After the *E/Z* ratio of the crude product was confirmed by  $^1\text{H}$  NMR spectroscopy, the mixture was purified by flash silica gel column chromatography [gradient eluent: 30:1~25:1 petroleum ether/EtOAc] to afford a 4:1 mixture of ethene-1,1-diamines *E*-**5o** (158.1 mg, 0.37 mmol) and *Z*-**5o** (39.5 mg, 0.09 mmol) in 91% yield.

*E*-**5o** and *Z*-**5o**:  $R_f$  = 0.38 [10:1 petroleum ether/EtOAc]; colorless oil;  $^1\text{H}$  NMR (400 MHz,  $\text{CDCl}_3$ )  $\delta$  7.77 (d, 0.3H,  $J$  = 8.1 Hz, minor), 7.64 (d, 2.0H,  $J$  = 8.1 Hz, major), 7.20-7.18 (m, 9.0H), 6.91-6.88 (m, 1.5H), 6.79 (t, 1.0H,  $J$  = 7.4 Hz, major), 6.64-6.60 (m, 0.3H, minor), 6.55 (t, 1.0H,  $J$  = 7.3 Hz, major), 6.41 (d, 0.3H,  $J$  = 7.8 Hz, minor), 6.28 (d, 1.0H,  $J$  = 8.3 Hz, major), 5.24-5.15 (m, 1.3H), 4.58-4.52 (m, 2.5H), 3.22 (t, 0.5H,  $J$  = 5.4 Hz, minor), 3.03 (t, 2.0H,  $J$  = 5.6 Hz, major), 2.71 (t, 0.5H,  $J$  = 6.4 Hz, minor), 2.62 (t, 2.0H,  $J$  = 6.4 Hz, major), 2.36 (s, 3.0H, major), 2.11 (s, 0.8H, minor), 1.91-1.85 (m, 0.5H, minor), 1.73-1.67 (m, 2.0H, major), 1.64 (d, 0.8H,  $J$  = 7.0 Hz, minor), 1.32 (d, 3.0H,  $J$  = 7.0 Hz, major);  $^{13}\text{C}$  NMR (100 MHz,  $\text{CDCl}_3$ ) (*E*-**5o**, major):  $\delta$  143.4, 141.9, 138.0, 137.1, 136.8, 129.4, 129.26, 128.4, 128.3, 127.6, 127.4, 126.6, 122.5, 117.6, 115.6, 114.4, 51.3, 46.2, 27.9, 21.7, 21.57, 13.5; (*Z*-**5o**, minor):  $\delta$  144.3, 143.5, 139.7, 137.7, 136.3, 129.5, 129.30, 129.2, 128.5, 127.9, 127.8, 126.1, 125.0, 118.9, 118.3, 117.1, 51.6, 46.8, 27.8, 21.10, 21.07, 14.1; IR (neat) ( $\text{cm}^{-1}$ ) 2929w, 1658w, 1600m, 1493s, 1338s, 1302m, 1154s, 1090m; HRMS (ESI):  $m/z$  calcd for  $\text{C}_{26}\text{H}_{28}\text{N}_2\text{O}_2\text{S}$   $[\text{M}+\text{H}]^+$ : 433.1944; found 433.1940.

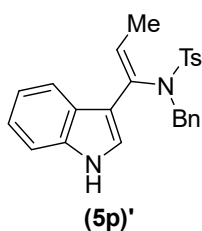

To an oven-dried sealed tube was added secondary amine **4p** (70.5 mg, 0.60 mmol), ynamide **2a** (149.7 mg, 0.50 mmol), DCE (2.5 mL, ynamide *concn* = 0.20 M), and TfOH (8.9  $\mu$ L, 0.10 mmol) at 30 °C. The reaction vessel was capped and stirred at 30 °C for 1.0 h. After the reaction was judged to be complete by TLC, the reaction mixture was cooled to rt, filtered through a pad of silica gel and concentrated in vacuo. After the *Z/E* ratio of the crude product was confirmed by <sup>1</sup>H NMR spectroscopy, the mixture was purified by flash silica gel column chromatography [gradient eluent: 15:1~4:1 petroleum ether/EtOAc] to afford a 2.5:1 mixture of 3-alkenylindoles *Z*-**(5p)'** (122.3 mg, 0.29 mmol) and *E*-**(5p)'** (48.9 mg, 0.12 mmol) in 82% yield.

*Z*-**(5p)'** and *E*-**(5p)'**:  $R_f$  = 0.31 [4:1 petroleum ether/EtOAc]; colorless oil; <sup>1</sup>H NMR (400 MHz, CDCl<sub>3</sub>)  $\delta$  8.52 (s, 0.4H, minor), 8.37 (s, 1.0H, major), 7.81 (d, 2.0H,  $J$  = 8.2 Hz, major), 7.71 (d, 0.8H,  $J$  = 8.2 Hz, minor), 7.62 (d, 1.0H,  $J$  = 7.2 Hz, major), 7.23 (d, 4.0H,  $J$  = 8.3 Hz, major), 7.18-7.04 (m, 10.0H), 7.01-6.99 (m, 0.4H, minor), 6.63 (d, 1.0H,  $J$  = 2.6 Hz, major), 6.59 (d, 0.4H,  $J$  = 2.6 Hz, minor), 6.11 (q, 1.0H,  $J$  = 6.9 Hz, major), 5.66 (q, 0.4H,  $J$  = 7.1 Hz, minor), 4.43 (s, 2.8H), 2.37 (s, 3.0H, major), 2.36 (s, 1.2H, minor), 1.48 (d, 1.2H,  $J$  = 7.1 Hz, minor), 1.37 (d, 3.0H,  $J$  = 7.0 Hz, major); <sup>13</sup>C NMR (100 MHz, CDCl<sub>3</sub>) (*Z*-**(5p)'**, major):  $\delta$  143.5, 138.25, 136.7, 136.2, 130.9, 129.9, 129.7, 128.2, 127.9, 127.8, 125.9, 124.0, 122.3, 120.2, 120.0, 114.2, 111.6, 111.4, 52.5, 21.70, 14.5; (*E*-**(5p)'**, minor):  $\delta$  144.3, 138.30, 137.1, 135.6, 130.3, 129.6, 129.0, 128.4, 128.3, 127.75, 127.72, 127.5, 126.9, 124.8, 122.0, 120.3, 119.9, 52.1, 21.67, 15.1, one carbon missing due to overlap, overlapped signal at 129.0 ppm; IR (neat) (cm<sup>-1</sup>) 2916w, 1730w, 1529m, 1456m, 1333s, 1154s, 1091m; HRMS (ESI):  $m/z$  calcd for C<sub>25</sub>H<sub>24</sub>N<sub>2</sub>O<sub>2</sub>S [M+H]<sup>+</sup>: 417.1631; found 417.1621.

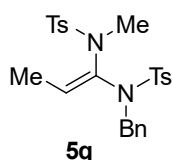

To an oven-dried sealed tube was added secondary amine **4q** (111.2 mg, 0.60 mmol), ynamide **2a** (149.7 mg, 0.50 mmol), DCE (2.5 mL, ynamide *concn* = 0.20 M), and TfOH (8.9  $\mu$ L, 0.10 mmol) at 30 °C. The reaction vessel was capped and stirred at 30 °C for 1.0 h. After the reaction was judged to be complete by TLC, the reaction mixture was cooled to rt, filtered through a pad of silica gel and concentrated in vacuo. After the *E/Z* ratio of the crude product was confirmed by <sup>1</sup>H NMR spectroscopy, the mixture was purified by flash silica gel column chromatography [gradient eluent: 10:1~6:1 petroleum ether/EtOAc] to afford a 1:1 mixture of ethene-1,1-diamines *E*-**5q** (119.5 mg, 0.25 mmol) and *Z*-**5q** (119.5 mg, 0.25 mmol) in 99% yield.

*E*-**5q** and *Z*-**5q**:  $R_f$  = 0.44 [4:1 petroleum ether/EtOAc]; colorless oil; <sup>1</sup>H NMR (400 MHz, CDCl<sub>3</sub>)  $\delta$  7.84-7.81 (m, 2H), 7.70-7.65 (m, 6H), 7.48-7.45 (m, 2H), 7.36-7.33 (m, 2H), 7.30-7.21 (m, 14H), 5.19 (q, 1H,  $J$  = 7.1 Hz), 5.09 (q, 1H,  $J$  = 7.0 Hz), 4.64(s, 2H), 4.63 (s, 2H), 2.86 (s, 3H), 2.85 (s, 3H),



2.40 (s, 6H), 2.38 (s, 6H), 1.28 (dd, 6H,  $J = 10.0, 7.1$  Hz);  $^{13}\text{C}$  NMR (100 MHz,  $\text{CDCl}_3$ )  $\delta$  143.9, 143.8, 143.6, 143.5, 137.3, 137.0, 136.6, 136.0, 135.8, 134.3, 133.8, 133.6, 129.8, 129.7, 129.6, 129.51, 129.49, 129.3, 129.0, 128.2, 128.12, 128.11, 127.82, 127.78, 127.6, 127.5, 127.3, 52.5, 51.4, 39.4, 36.7, 21.51, 21.49, 14.0, 13.3, three carbon missing due to overlap, one overlapped signal at 127.82 ppm, two overlapped signal at 21.49 ppm; IR (neat) ( $\text{cm}^{-1}$ ) 3032w, 2924w, 1597m, 1456m, 1342s, 1153s, 1087m; HRMS (ESI):  $m/z$  calcd for  $\text{C}_{25}\text{H}_{28}\text{N}_2\text{O}_4\text{S}_2$   $[\text{M}+\text{H}]^+$ : 485.1563; found 485.1565.

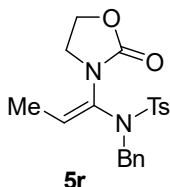

To an oven-dried sealed tube was added secondary amine **4r** (52.2 mg, 0.60 mmol), ynamide **2a** (149.7 mg, 0.50 mmol), DCE (2.5 mL, ynamide *concn* = 0.20 M), and TfOH (8.9  $\mu\text{L}$ , 0.10 mmol) at 30 °C. The reaction vessel was capped and stirred at 30 °C for 1.0 h. After the reaction was judged to be complete by TLC, the reaction mixture was cooled to rt, filtered through a pad of silica gel and concentrated in vacuo. After the *E/Z* ratio of the crude product was confirmed by  $^1\text{H}$  NMR spectroscopy, the mixture was purified by flash silica gel column chromatography [gradient eluent: 20:1~4:1 petroleum ether/EtOAc] to afford a 14:1 mixture of ethene-1,1-diamines *E*-**5r** (137.4 mg, 0.36 mmol) and *Z*-**5r** (9.8 mg, 0.03 mmol) in 76% yield.

*E*-**5r**:  $R_f = 0.48$  [2:1 petroleum ether/EtOAc]; white solid; mp = 169–170 °C;  $^1\text{H}$  NMR (400 MHz,  $\text{CDCl}_3$ )  $\delta$  7.82 (d, 2H,  $J = 8.3$  Hz), 7.36-7.29 (m, 7H), 5.68 (q, 1H,  $J = 7.2$  Hz), 4.48 (s, 2H), 4.04 (t, 2H,  $J = 8.0$  Hz), 3.18 (s, 2H), 2.44 (s, 3H), 1.09 (d, 3H,  $J = 7.3$  Hz);  $^{13}\text{C}$  NMR (100 MHz,  $\text{CDCl}_3$ )  $\delta$  156.9, 144.1, 136.8, 135.7, 129.9, 129.8, 129.1, 128.6, 128.4, 127.5, 123.0, 61.6, 53.3, 44.1, 21.6, 12.6; IR (neat) ( $\text{cm}^{-1}$ ) 2924w, 1758s, 1477m, 1398m, 1156s, 1088s; HRMS (ESI):  $m/z$  calcd for  $\text{C}_{20}\text{H}_{22}\text{N}_2\text{O}_4\text{S}$   $[\text{M}+\text{H}]^+$ : 387.1373; found 387.1366.

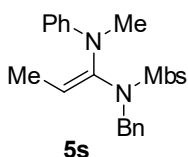

To an oven-dried sealed tube was added secondary amine **4a** (64.3 mg, 0.60 mmol), ynamide **2b** (157.7 mg, 0.50 mmol), DCE (2.5 mL, ynamide *concn* = 0.20 M), and TfOH (8.9  $\mu\text{L}$ , 0.10 mmol) at 30 °C. The reaction vessel was capped and stirred at 30 °C for 1.0 h. After the reaction was judged to be complete by TLC, the reaction mixture was cooled to rt, filtered through a pad of silica gel and concentrated in vacuo. After the *E/Z* ratio of the crude product was confirmed by  $^1\text{H}$  NMR spectroscopy, the mixture was purified by flash silica gel column chromatography [gradient eluent:

20:1~15:1 petroleum ether/EtOAc] to afford a 11:1 mixture of ethene-1,1-diamines *E*-**5s** (184.0 mg, 0.44 mmol) and *Z*-**5s** (16.7 mg, 0.04 mmol) in 95% yield.

*E*-**5s**:  $R_f = 0.36$  [4:1 petroleum ether/EtOAc]; colorless oil;  $^1\text{H NMR}$  (400 MHz,  $\text{CDCl}_3$ )  $\delta$  7.69-7.65 (m, 2H), 7.24-7.18 (m, 5H), 7.09-7.05 (m, 2H), 6.88-6.84 (m, 2H), 6.71-6.67 (m, 1H), 6.52 (dd, 2H,  $J = 8.9, 1.2$  Hz), 5.21 (q, 1H,  $J = 7.0$  Hz), 4.56 (s, 2H), 3.79 (s, 3H), 2.69 (s, 3H), 1.28 (d, 3H,  $J = 7.0$  Hz);  $^{13}\text{C NMR}$  (100 MHz,  $\text{CDCl}_3$ )  $\delta$  162.8, 146.3, 137.6, 137.1, 132.3, 129.6, 128.8, 128.3, 128.2, 127.4, 118.2, 114.7, 114.0, 113.9, 55.6, 51.6, 34.9, 13.2; IR (neat) ( $\text{cm}^{-1}$ ) 2929w, 1657w, 1596s, 1497s, 1345m, 1259m, 1151s; HRMS (ESI):  $m/z$  calcd for  $\text{C}_{24}\text{H}_{26}\text{N}_2\text{O}_3\text{S}$   $[\text{M}+\text{H}]^+$ : 423.1737; found 423.1738.

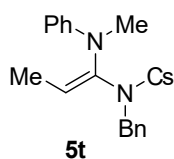

To an oven-dried sealed tube was added secondary amine **4a** (64.3 mg, 0.60 mmol), ynamide **2c** (159.9 mg, 0.50 mmol), DCE (2.5 mL, ynamide *concn* = 0.20 M), and TfOH (8.9  $\mu\text{L}$ , 0.10 mmol) at 30 °C. The reaction vessel was capped and stirred at 30 °C for 3.0 h. After the reaction was judged to be complete by TLC, the reaction mixture was cooled to rt, filtered through a pad of silica gel and concentrated in vacuo. After the *E/Z* ratio of the crude product was confirmed by  $^1\text{H NMR}$  spectroscopy, the mixture was purified by flash silica gel column chromatography [gradient eluent: 30:1~20:1 petroleum ether/EtOAc] to afford a 11:1 mixture of ethene-1,1-diamines *E*-**5t** (185.8 mg, 0.44 mmol) and *Z*-**5t** (16.9 mg, 0.04 mmol) in 95% yield.

*E*-**5t**:  $R_f = 0.30$  [20:1 petroleum ether/EtOAc]; colorless oil;  $^1\text{H NMR}$  (400 MHz,  $\text{CDCl}_3$ )  $\delta$  7.61-7.57 (m, 2H), 7.33-7.30 (m, 2H), 7.26-7.19 (m, 5H), 7.11-7.07 (m, 2H), 6.74-6.70 (m, 1H), 6.54 (dd, 2H,  $J = 8.9, 1.2$  Hz), 5.14 (q, 1H,  $J = 7.0$  Hz), 4.60 (s, 2H), 2.72 (s, 3H), 1.29 (d, 3H,  $J = 7.1$  Hz);  $^{13}\text{C NMR}$  (100 MHz,  $\text{CDCl}_3$ )  $\delta$  146.1, 139.4, 138.9, 137.9, 136.8, 129.0, 128.9, 128.8, 128.5, 128.3, 127.7, 118.6, 114.9, 114.1, 52.2, 35.2, 13.2; IR (neat) ( $\text{cm}^{-1}$ ) 2937w, 1598m, 1498m, 1348s, 1212w, 1161s, 1087s; HRMS (ESI):  $m/z$  calcd for  $\text{C}_{23}\text{H}_{23}\text{ClN}_2\text{O}_2\text{S}$   $[\text{M}+\text{H}]^+$ : 427.1242; found 427.1241.

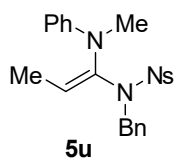

To an oven-dried sealed tube was added secondary amine **4a** (64.3 mg, 0.60 mmol), ynamide **2d** (165.2 mg, 0.50 mmol), DCE (2.5 mL, ynamide *concn* = 0.20 M), and TfOH (8.9  $\mu\text{L}$ , 0.10 mmol) at 80 °C. The reaction vessel was capped and stirred at 80 °C for 1.0 h. After the reaction was judged to be complete by TLC, the reaction mixture was cooled to rt, filtered through a pad of silica gel and

concentrated in vacuo. After the *E/Z* ratio of the crude product was confirmed by <sup>1</sup>H NMR spectroscopy, the mixture was purified by flash silica gel column chromatography [gradient eluent: 30:1~20:1 petroleum ether/EtOAc] to afford a 11:1 mixture of ethene-1,1-diamines *E*-**5u** (183.1 mg, 0.42 mmol) and *Z*-**5u** (16.6 mg, 0.04 mmol) in 91% yield.

*E*-**5u**: *R<sub>f</sub>* = 0.29 [10:1 petroleum ether/EtOAc]; yellow solid; mp = 68–69 °C; <sup>1</sup>H NMR (400 MHz, CDCl<sub>3</sub>) δ 8.12–8.09 (m, 2H), 7.74–7.71 (m, 2H), 7.27 (s, 5H), 7.11–7.07 (m, 2H), 6.75–6.71 (m, 1H), 6.54 (dd, 2H, *J* = 8.9, 1.2 Hz), 5.12 (q, 1H, *J* = 7.0 Hz), 4.70 (s, 2H), 2.76 (s, 3H), 1.32 (d, 3H, *J* = 7.0 Hz); <sup>13</sup>C NMR (100 MHz, CDCl<sub>3</sub>) δ 149.8, 146.6, 146.0, 138.5, 136.6, 129.1, 128.8, 128.5, 128.4, 128.1, 123.9, 119.1, 115.1, 114.1, 53.2, 35.9, 13.2; IR (neat) (cm<sup>-1</sup>) 2918w, 1597m, 1521s, 1433w, 1342s, 1226m, 1160s, 1088m; HRMS (ESI): *m/z* calcd for C<sub>23</sub>H<sub>23</sub>N<sub>3</sub>O<sub>4</sub>S [M+H]<sup>+</sup>: 438.1482; found 438.1481.

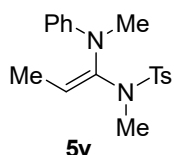

To an oven-dried sealed tube was added secondary amine **4a** (64.3 mg, 0.60 mmol), ynamide **2e** (112.0 mg, 0.50 mmol), DCE (2.5 mL, ynamide *concn* = 0.20 M), and TfOH (8.9 μL, 0.10 mmol) at 30 °C. The reaction vessel was capped and stirred at 30 °C for 1.0 h. After the reaction was judged to be complete by TLC, the reaction mixture was cooled to rt, filtered through a pad of silica gel and concentrated in vacuo. After the *E/Z* ratio of the crude product was confirmed by <sup>1</sup>H NMR spectroscopy, the mixture was purified by flash silica gel column chromatography [gradient eluent: 25:1~18:1 petroleum ether/EtOAc] to afford a 6:1 mixture of ethene-1,1-diamines *E*-**5v** (136.2 mg, 0.41 mmol) and *Z*-**5v** (22.7 mg, 0.07 mmol) in 96% yield.

*E*-**5v** and *Z*-**5v**: *R<sub>f</sub>* = 0.30 [10:1 petroleum ether/EtOAc]; colorless oil; <sup>1</sup>H NMR (400 MHz, CDCl<sub>3</sub>) δ 7.63–7.59 (m, 2.3H), 7.23–7.15 (m, 4.7H), 6.95 (d, 0.3H, *J* = 7.9 Hz, minor), 6.81 (t, 0.2H, *J* = 7.2 Hz, minor), 6.75 (t, 1.0H, *J* = 7.3 Hz, major), 6.70 (d, 2.0H, *J* = 8.0 Hz, major), 5.07–4.99 (m, 1.2H), 3.11 (s, 0.5H, minor), 3.00 (s, 3.0H, major), 2.94 (s, 3.0H, major), 2.64 (s, 0.5H, minor), 2.38 (s, 3.0H, major), 2.34 (s, 0.5H, minor), 1.66 (d, 0.5H, *J* = 7.1 Hz, minor), 1.40 (d, 3.0H, *J* = 7.0 Hz, major); <sup>13</sup>C NMR (100 MHz, CDCl<sub>3</sub>) (*E*-**5v**, major): δ 146.3, 143.3, 140.1, 136.3, 129.4, 128.9, 127.3, 118.2, 113.8, 113.1, 36.8, 36.1, 21.52, 12.9; (*Z*-**5v**, minor): δ 148.1, 143.8, 143.1, 137.0, 129.3, 128.7, 127.2, 119.7, 117.3, 113.3, 37.9, 37.2, 21.48, 12.8; IR (neat) (cm<sup>-1</sup>) 2900w, 1651m, 1598m, 1498m, 1343s, 1168s, 1011m; HRMS (ESI): *m/z* calcd for C<sub>18</sub>H<sub>22</sub>N<sub>2</sub>O<sub>2</sub>S [M+H]<sup>+</sup>: 331.1475; found 331.1476.

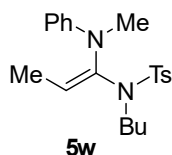

To an oven-dried sealed tube was added secondary amine **4a** (64.3 mg, 0.60 mmol), ynamide **2f** (132.7 mg, 0.50 mmol), DCE (2.5 mL, ynamide *concn* = 0.20 M), and TfOH (8.9  $\mu$ L, 0.10 mmol) at 30 °C. The reaction vessel was capped and stirred at 30 °C for 1.0 h. After the reaction was judged to be complete by TLC, the reaction mixture was cooled to rt, filtered through a pad of silica gel and concentrated in vacuo. After the *E/Z* ratio of the crude product was confirmed by  $^1\text{H}$  NMR spectroscopy, the mixture was purified by flash silica gel column chromatography [gradient eluent: 45:1~30:1 petroleum ether/EtOAc] to afford a 8:1 mixture of ethene-1,1-diamines *E*-**5w** (163.0 mg, 0.44 mmol) and *Z*-**5w** (20.4 mg, 0.05 mmol) in 98% yield.

*E*-**5w** and *Z*-**5w**:  $R_f$  = 0.32 [20:1 petroleum ether/EtOAc]; colorless oil;  $^1\text{H}$  NMR (400 MHz,  $\text{CDCl}_3$ )  $\delta$  7.72 (d, 2.3H,  $J$  = 8.2 Hz), 7.25 (d, 2.3H,  $J$  = 8.2 Hz), 7.19 (t, 2.3H,  $J$  = 7.6 Hz), 7.03 (d, 0.3H,  $J$  = 8.2 Hz, minor), 6.83 (t, 0.1H,  $J$  = 7.3 Hz, minor), 6.76 (d, 3.0H,  $J$  = 7.9 Hz, major), 5.22 (q, 1.1H,  $J$  = 6.8 Hz), 3.31 (t, 2.3H,  $J$  = 7.8 Hz), 2.83 (s, 3.0H, major), 2.75 (s, 0.4H, minor), 2.39 (s, 3.0H, major), 2.37 (s, 0.4H, minor), 1.73 (d, 0.4H,  $J$  = 7.1 Hz, minor), 1.62-1.54 (m, 2.3H), 1.37 (d, 3.0H,  $J$  = 7.0 Hz, major), 1.24-1.15 (m, 2.3H), 0.88-0.80 (m, 3.4H);  $^{13}\text{C}$  NMR (100 MHz,  $\text{CDCl}_3$ ) (*E*-**5w**, major):  $\delta$  146.6, 143.3, 137.8, 137.2, 129.42, 129.0, 127.57, 118.2, 114.9, 113.9, 48.1, 35.0, 31.2, 21.53, 20.0, 13.7, 13.4; (*Z*-**5w**, minor):  $\delta$  148.9, 143.2, 140.4, 137.7, 129.37, 128.8, 127.61, 120.0, 117.7, 116.2, 48.5, 37.1, 30.9, 21.50, 20.1, 14.0, 13.8; IR (neat) ( $\text{cm}^{-1}$ ) 2935w, 1597m, 1498m, 1345s, 1210w, 1159s; HRMS (ESI):  $m/z$  calcd for  $\text{C}_{21}\text{H}_{28}\text{N}_2\text{O}_2\text{S}$  [ $\text{M}+\text{H}$ ] $^+$ : 373.1944; found 373.1944.

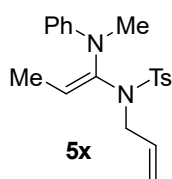

To an oven-dried sealed tube was added secondary amine **4a** (64.3 mg, 0.60 mmol), ynamide **2h** (124.7 mg, 0.50 mmol), DCE (2.5 mL, ynamide *concn* = 0.20 M), and TfOH (8.9  $\mu$ L, 0.10 mmol) at 30 °C. The reaction vessel was capped and stirred at 30 °C for 1.0 h. After the reaction was judged to be complete by TLC, the reaction mixture was cooled to rt, filtered through a pad of silica gel and concentrated in vacuo. After the *E/Z* ratio of the crude product was confirmed by  $^1\text{H}$  NMR spectroscopy, the mixture was purified by flash silica gel column chromatography [gradient eluent: 25:1~20:1 petroleum ether/EtOAc] to afford a 9:1 mixture of ethene-1,1-diamines *E*-**5x** (151.9 mg, 0.43 mmol) and *Z*-**5x** (16.9 mg, 0.05 mmol) in 95% yield.

*E*-**5x** and *Z*-**5x**:  $R_f = 0.24$  [20:1 petroleum ether/EtOAc]; colorless oil;  $^1\text{H NMR}$  (400 MHz,  $\text{CDCl}_3$ )  $\delta$  7.70 (d, 2.2H,  $J = 8.2$  Hz), 7.25-7.23 (m, 2.2H), 7.21-7.16 (m, 2.2H), 7.03 (d, 0.2H,  $J = 7.9$  Hz, minor), 6.84 (t, 0.1H,  $J = 7.2$  Hz, minor), 6.76-6.73 (m, 3.0H, major), 5.87-5.77 (m, 1.1H), 5.19 (q, 1.1H,  $J = 7.0$  Hz), 5.13-5.07 (m, 2.2H), 4.01 (d, 2.2H,  $J = 6.1$  Hz), 2.85 (s, 3.0H, major), 2.72 (s, 0.3H, minor), 2.40 (s, 3.0H, major), 2.38 (s, 0.3H, minor), 1.69 (d, 0.3H,  $J = 7.0$  Hz, minor), 1.35 (d, 3.0H,  $J = 7.0$  Hz, major);  $^{13}\text{C NMR}$  (100 MHz,  $\text{CDCl}_3$ ) (*E*-**5x**, major):  $\delta$  146.6, 143.44, 137.9, 137.6, 134.0, 129.5, 128.9, 127.6, 118.3, 118.2, 115.1, 114.0, 50.8, 35.2, 21.63, 13.3; (*Z*-**5x**, minor):  $\delta$  148.8, 143.36, 141.3, 137.8, 133.6, 129.4, 128.8, 127.7, 120.0, 118.8, 117.9, 115.5, 52.1, 36.9, 21.59, 13.9; IR (neat) ( $\text{cm}^{-1}$ ) 2927w, 1656w, 1596m, 1500m, 1342s, 1157s, 1087m; HRMS (ESI):  $m/z$  calcd for  $\text{C}_{20}\text{H}_{24}\text{N}_2\text{O}_2\text{S}$   $[\text{M}+\text{H}]^+$ : 357.1631; found 357.1634.

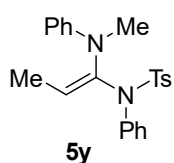

To an oven-dried sealed tube was added secondary amine **4a** (64.3 mg, 0.60 mmol), ynamide **2g** (142.7 mg, 0.50 mmol), DCE (2.5 mL, ynamide *concn* = 0.20 M), and TfOH (8.9  $\mu\text{L}$ , 0.10 mmol) at 80 °C. The reaction vessel was capped and stirred at 80 °C for 8.0 h. After the reaction was judged to be complete by TLC, the reaction mixture was cooled to rt, filtered through a pad of silica gel and concentrated in vacuo. After the *E/Z* ratio of the crude product was confirmed by  $^1\text{H NMR}$  spectroscopy, the mixture was purified by flash silica gel column chromatography [gradient eluent: 30:1~25:1 petroleum ether/EtOAc] to afford a 13:1 mixture of ethene-1,1-diamines *E*-**5y** (171.8 mg, 0.44 mmol) and *Z*-**5y** (13.2 mg, 0.03 mmol) in 94% yield.

*E*-**5y**:  $R_f = 0.32$  [10:1 petroleum ether/EtOAc]; white solid; mp = 121–122 °C;  $^1\text{H NMR}$  (400 MHz,  $\text{CDCl}_3$ )  $\delta$  7.55-7.52 (m, 2H), 7.24-7.18 (m, 5H), 7.14-7.09 (m, 4H), 6.73-6.68 (m, 1H), 6.64 (dd, 2H,  $J = 8.9, 1.2$  Hz), 5.30 (q, 1H,  $J = 6.9$  Hz), 2.89 (s, 3H), 2.38 (s, 3H), 1.46 (d, 3H,  $J = 7.0$  Hz);  $^{13}\text{C NMR}$  (100 MHz,  $\text{CDCl}_3$ )  $\delta$  146.1, 143.5, 140.1, 138.8, 137.6, 129.9, 129.4, 128.9, 128.7, 128.4, 128.0, 118.4, 114.3, 113.7, 36.8, 21.6, 13.1; IR (neat) ( $\text{cm}^{-1}$ ) 2925w, 1596m, 1496m, 1347s, 1236w, 1162s, 1091s; HRMS (ESI):  $m/z$  calcd for  $\text{C}_{23}\text{H}_{24}\text{N}_2\text{O}_2\text{S}$   $[\text{M}+\text{Na}]^+$ : 415.1451; found 415.1450.

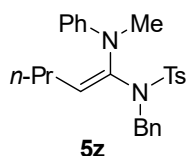

To an oven-dried sealed tube was added secondary amine **4a** (64.3 mg, 0.60 mmol), ynamide **2i** (163.7 mg, 0.50 mmol), DCE (2.5 mL, ynamide *concn* = 0.20 M), and TfOH (8.9  $\mu\text{L}$ , 0.10 mmol) at 30 °C. The reaction vessel was capped and stirred at 30 °C for 3.0 h. After the reaction was judged to be complete by TLC, the reaction mixture was cooled to rt, filtered through a pad of silica gel and

concentrated in vacuo. After the *E/Z* ratio of the crude product was confirmed by <sup>1</sup>H NMR spectroscopy, the mixture was purified by flash silica gel column chromatography [gradient eluent: 40:1~30:1 petroleum ether/EtOAc] to afford a 10:1 mixture of ethene-1,1-diamines *E*-**5z** (186.5 mg, 0.43 mmol) and *Z*-**5z** (18.7 mg, 0.04 mmol) in 94% yield.

*E*-**5z**: *R<sub>f</sub>* = 0.30 [20:1 petroleum ether/EtOAc]; colorless oil; <sup>1</sup>H NMR (400 MHz, CDCl<sub>3</sub>) δ 7.64-7.60 (m, 2H), 7.26-7.18 (m, 7H), 7.10-7.05 (m, 2H), 6.72-6.68 (m, 1H), 6.53 (dd, 2H, *J* = 8.9, 1.1 Hz), 5.10 (t, 1H, *J* = 7.2 Hz), 4.58 (s, 2H), 2.71 (s, 3H), 2.40 (s, 3H), 1.61 (q, 2H, *J* = 7.2 Hz), 1.30-1.21 (m, 2H), 0.78 (t, 3H, *J* = 7.3 Hz); <sup>13</sup>C NMR (100 MHz, CDCl<sub>3</sub>) δ 146.5, 143.4, 137.9, 137.1, 136.8, 129.4, 128.7, 128.30, 128.29, 127.6, 127.4, 120.6, 118.3, 114.0, 51.6, 35.3, 29.7, 22.0, 21.5, 13.8; IR (neat) (cm<sup>-1</sup>) 2929w, 1598m, 1498s, 1342s, 1209w, 1157s, 1090m; HRMS (ESI): *m/z* calcd for C<sub>26</sub>H<sub>30</sub>N<sub>2</sub>O<sub>2</sub>S [M+H]<sup>+</sup>: 435.2101; found 435.2102.

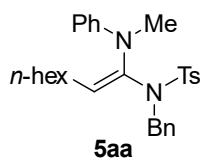

To an oven-dried sealed tube was added secondary amine **4a** (64.3 mg, 0.60 mmol), ynamide **2j** (184.8 mg, 0.50 mmol), DCE (2.5 mL, ynamide *concn* = 0.20 M), and TfOH (8.9 μL, 0.10 mmol) at 30 °C. The reaction vessel was capped and stirred at 30 °C for 1.0 h. After the reaction was judged to be complete by TLC, the reaction mixture was cooled to rt, filtered through a pad of silica gel and concentrated in vacuo. After the *E/Z* ratio of the crude product was confirmed by <sup>1</sup>H NMR spectroscopy, the mixture was purified by flash silica gel column chromatography [gradient eluent: 35:1~30:1 petroleum ether/EtOAc] to afford a 9:1 mixture of ethene-1,1-diamines *E*-**5aa** (203.9 mg, 0.43 mmol) and *Z*-**5aa** (22.7 mg, 0.05 mmol) in 95% yield.

*E*-**5aa** and *Z*-**5aa**: *R<sub>f</sub>* = 0.37 [20:1 petroleum ether/EtOAc]; colorless oil; <sup>1</sup>H NMR (400 MHz, CDCl<sub>3</sub>) δ 7.69 (d, 0.2H, *J* = 8.3 Hz, minor), 7.62 (d, 2.0H, *J* = 8.4 Hz, major), 7.25-7.18 (m, 7.8H), 7.12-7.09 (m, 0.2H, minor), 7.08-7.03 (m, 2.0H, major), 6.82-6.77 (m, 0.3H, minor), 6.71-6.66 (m, 1.0H, major), 6.53 (dd, 2.0H, *J* = 8.9, 1.2 Hz, major), 5.09 (t, 1.0H, *J* = 7.2 Hz, major), 4.99 (t, 0.1H, *J* = 7.2 Hz, minor), 4.58 (s, 2.0H, major), 4.47 (s, 0.2H, minor), 2.68 (s, 3.0H, major), 2.61 (s, 0.3H, minor), 2.37 (s, 3.0H, major), 2.36 (s, 0.3H, minor), 2.07 (q, 0.2H, *J* = 6.8 Hz, minor), 1.62 (q, 2.0H, *J* = 6.9 Hz, major), 1.26-1.19 (m, 4.4H), 1.15-1.11 (m, 4.4H), 0.88-0.82 (m, 3.3H); <sup>13</sup>C NMR (100 MHz, CDCl<sub>3</sub>) (*E*-**5aa**, major): δ 146.5, 143.36, 137.9, 137.1, 136.7, 129.4, 128.7, 128.314, 128.307, 127.6, 127.4, 120.8, 118.3, 114.0, 51.66, 35.3, 31.6, 28.8, 28.70, 27.6, 22.6, 21.6, 14.155; (*Z*-**5aa**, minor): δ 148.7, 143.44, 138.7, 137.7, 136.2, 129.5, 129.3, 128.6, 128.27, 127.9, 127.8, 121.3, 120.1, 118.4, 51.73, 36.8, 31.7, 29.2, 29.0, 28.67, 22.7, 21.5, 14.162; IR (neat) (cm<sup>-1</sup>) 2925w, 1597m,

1498m, 1342s, 1157s, 1026w; HRMS (ESI):  $m/z$  calcd for  $C_{29}H_{36}N_2O_2S$   $[M+H]^+$ : 477.2570; found 477.2572.

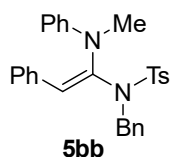

To an oven-dried sealed tube was added secondary amine **4a** (64.3 mg, 0.60 mmol), ynamide **2k** (180.8 mg, 0.50 mmol), DCE (2.5 mL, ynamide *concn* = 0.20 M), and TfOH (8.9  $\mu$ L, 0.10 mmol) at 30 °C. The reaction vessel was capped and stirred at 30 °C for 1.0 h. After the reaction was judged to be complete by TLC, the reaction mixture was cooled to rt, filtered through a pad of silica gel and concentrated in vacuo. After the *E/Z* ratio of the crude product was confirmed by  $^1H$  NMR spectroscopy, the mixture was purified by flash silica gel column chromatography [gradient eluent: 35:1~25:1 petroleum ether/EtOAc] to afford a 9:1 mixture of ethene-1,1-diamines *E*-**5bb** (201.4 mg, 0.43 mmol) and *Z*-**5bb** (22.4 mg, 0.05 mmol) in 96% yield.

*E*-**5bb**:  $R_f$  = 0.33 [10:1 petroleum ether/EtOAc]; colorless oil;  $^1H$  NMR (400 MHz,  $CDCl_3$ )  $\delta$  7.67 (d, 2H,  $J$  = 8.4 Hz), 7.25-7.19 (m, 7H), 7.12-6.98 (m, 7H), 6.77-6.73 (m, 1H), 6.63 (dd, 2H,  $J$  = 8.8, 1.1 Hz), 6.02 (s, 1H), 4.57 (s, 2H), 2.66 (s, 3H), 2.44 (s, 3H);  $^{13}C$  NMR (100 MHz,  $CDCl_3$ )  $\delta$  145.2, 143.8, 138.2, 137.4, 136.7, 135.1, 129.6, 128.9, 128.5, 128.4, 128.3, 128.0, 127.7, 127.6, 126.8, 120.0, 116.5, 116.2, 51.9, 37.4, 21.8; IR (neat) ( $cm^{-1}$ ) 2943w, 1620m, 1595m, 1343s, 1228w, 1163s; HRMS (ESI):  $m/z$  calcd for  $C_{29}H_{28}N_2O_2S$   $[M+H]^+$ : 469.1944; found 469.1942. Spectral data are in agreement with literature values<sup>19</sup>.

*Z*-**5bb**:  $R_f$  = 0.36 [10:1 petroleum ether/EtOAc]; colorless oil;  $^1H$  NMR (400 MHz,  $CDCl_3$ )  $\delta$  7.51-7.47 (m, 4H), 7.36 (t, 2H,  $J$  = 7.6 Hz), 7.25-7.20 (m, 8H), 7.14-7.08 (m, 4H), 6.90-6.86 (m, 1H), 5.78 (s, 1H), 4.50 (s, 2H), 2.34 (s, 3H), 1.87 (s, 3H);  $^{13}C$  NMR (100 MHz,  $CDCl_3$ )  $\delta$  148.4, 143.4, 142.6, 138.6, 136.2, 135.7, 130.6, 129.3, 128.91, 128.89, 128.41, 128.39, 127.8, 127.7, 126.9, 121.0, 118.7, 114.6, 52.4, 34.5, 21.7; IR (neat) ( $cm^{-1}$ ) 2918w, 1626m, 1593m, 1342s, 1248w, 1156s; HRMS (ESI):  $m/z$  calcd for  $C_{29}H_{28}N_2O_2S$   $[M+H]^+$ : 469.1944; found 469.1945.

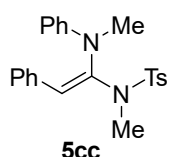

To an oven-dried sealed tube was added secondary amine **4a** (64.3 mg, 0.60 mmol), ynamide **2l** (142.7 mg, 0.50 mmol), DCE (2.5 mL, ynamide *concn* = 0.20 M), and TfOH (8.9  $\mu$ L, 0.10 mmol) at 30 °C. The reaction vessel was capped and stirred at 30 °C for 6.0 h. After the reaction was judged to be complete by TLC, the reaction mixture was cooled to rt, filtered through a pad of silica gel and

concentrated in vacuo. After the *E/Z* ratio of the crude product was confirmed by <sup>1</sup>H NMR spectroscopy, the mixture was purified by flash silica gel column chromatography [gradient eluent: 25:1~20:1 petroleum ether/EtOAc] to afford a 5:1 mixture of ethene-1,1-diamines *E*-**5cc** (148.6 mg, 0.38 mmol) and *Z*-**5cc** (29.7 mg, 0.08 mmol) in 91% yield.

*E*-**5cc** and *Z*-**5cc**: *R*<sub>f</sub> = 0.28 [10:1 petroleum ether/EtOAc]; white solid; mp = 106–107 °C; <sup>1</sup>H NMR (400 MHz, CDCl<sub>3</sub>) δ 7.55-7.51 (m, 2.4H), 7.45-7.40 (m, 0.4H, minor), 7.31 (t, 0.4H, *J* = 7.6 Hz, minor), 7.20-7.08 (m, 10.0H), 7.02 (dd, 0.4H, *J* = 8.8, 1.2 Hz, minor), 6.87-6.85 (m, 0.2H, minor), 6.84-6.80 (m, 1.0H, major), 6.75 (dd, 2.0H, *J* = 8.8, 1.2 Hz, major), 5.79 (s, 0.2H, minor), 5.69 (s, 1.0H, major), 3.10 (s, 3.0H, major), 3.035 (s, 0.6H, minor), 3.027 (s, 3.0H, major), 2.60 (s, 0.6H, minor), 2.39 (s, 3.0H, major), 2.34 (s, 0.6H, minor); <sup>13</sup>C NMR (100 MHz, CDCl<sub>3</sub>) (*E*-**5cc**, major): δ 145.6, 143.6, 141.6, 135.4, 135.0, 129.41, 128.91, 128.5, 127.5, 127.4, 127.0, 119.7, 116.0, 115.2, 38.4, 37.98, 21.7; (*Z*-**5cc**, minor): δ 147.6, 144.0, 143.2, 137.3, 129.45, 129.3, 128.86, 128.7, 127.8, 127.2, 126.8, 120.6, 117.9, 115.0, 37.99, 37.0, 21.6; IR (neat) (cm<sup>-1</sup>) 2956w, 1595m, 1491m, 1382m, 1344s, 1221w, 1161s; HRMS (ESI): *m/z* calcd for C<sub>23</sub>H<sub>24</sub>N<sub>2</sub>O<sub>2</sub>S [M+H]<sup>+</sup>: 393.1631; found 393.1632.

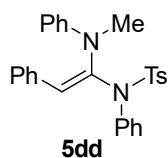

To an oven-dried sealed tube was added secondary amine **4a** (64.3 mg, 0.60 mmol), ynamide **2m** (173.7 mg, 0.50 mmol), DCE (2.5 mL, ynamide *concn* = 0.20 M), and TfOH (8.9 μL, 0.10 mmol) at 80 °C. The reaction vessel was capped and stirred at 80 °C for 5.0 h. After the reaction was judged to be complete by TLC, the reaction mixture was cooled to rt, filtered through a pad of silica gel and concentrated in vacuo. After the *E/Z* ratio of the crude product was confirmed by <sup>1</sup>H NMR spectroscopy, the mixture was purified by flash silica gel column chromatography [gradient eluent: 15:1~10:1 petroleum ether/EtOAc] to afford ethene-1,1-diamine *E*-**5dd** (215.0 mg, 0.47 mmol; *E/Z* ≥ 25/1) in 95% yield.

*E*-**5dd**: *R*<sub>f</sub> = 0.24 [10:1 petroleum ether/EtOAc]; colorless oil; <sup>1</sup>H NMR (400 MHz, CDCl<sub>3</sub>) δ 7.56 (d, 2H, *J* = 8.2 Hz), 7.25-7.16 (m, 11H), 7.13-7.08 (m, 1H), 6.99-6.97 (m, 2H), 6.88-6.81 (m, 3H), 6.13 (s, 1H), 2.69 (s, 3H), 2.41 (s, 3H); <sup>13</sup>C NMR (100 MHz, CDCl<sub>3</sub>) δ 145.0, 143.9, 140.5, 138.5, 137.3, 135.0, 129.9, 129.5, 128.8, 128.7, 128.5, 128.2, 127.6, 127.0, 120.0, 116.5, 114.9, 38.9, 21.7, one carbon missing due to overlap, overlapped signal at 128.5 ppm; IR (neat) (cm<sup>-1</sup>) 3028w, 2359m, 1637w, 1596m, 1495m, 1353s, 1163s, 1086s; HRMS (ESI): *m/z* calcd for C<sub>28</sub>H<sub>26</sub>N<sub>2</sub>O<sub>2</sub>S [M+H]<sup>+</sup>: 455.1788; found 455.1789. Spectral data are in agreement with literature values<sup>20</sup>.



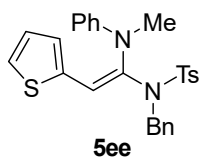

To an oven-dried sealed tube was added secondary amine **4a** (64.3 mg, 0.60 mmol), ynamide **2n** (183.8 mg, 0.50 mmol), DCE (2.5 mL, ynamide *concn* = 0.20 M), and TfOH (8.9  $\mu$ L, 0.10 mmol) at 80 °C. The reaction vessel was capped and stirred at 80 °C for 8.7 h. After the reaction was judged to be complete by TLC, the reaction mixture was cooled to rt, filtered through a pad of silica gel and concentrated in vacuo. After the *E/Z* ratio of the crude product was confirmed by  $^1\text{H}$  NMR spectroscopy, the mixture was purified by flash silica gel column chromatography [gradient eluent: 30:1~20:1 petroleum ether/EtOAc] to afford ethene-1,1-diamine *E*-**5ee** (194.3 mg, 0.41 mmol; *E/Z*  $\geq$  25/1) in 82% yield.

*E*-**5ee**:  $R_f$  = 0.29 [10:1 petroleum ether/EtOAc]; white solid; mp = 124–125 °C;  $^1\text{H}$  NMR (400 MHz,  $\text{CDCl}_3$ )  $\delta$  7.64 (d, 2H,  $J$  = 8.4 Hz), 7.23–7.14 (m, 7H), 7.03–6.99 (m, 2H), 6.97–6.95 (m, 1H), 6.83 (dd, 1H,  $J$  = 3.7, 1.2 Hz), 6.79 (dd, 1H,  $J$  = 5.1, 3.6 Hz), 6.75–6.70 (m, 1H), 6.60–6.56 (m, 3H), 4.54 (s, 2H), 2.73 (s, 3H), 2.36 (s, 3H);  $^{13}\text{C}$  NMR (100 MHz,  $\text{CDCl}_3$ )  $\delta$  144.8, 143.9, 137.1, 136.8, 134.6, 129.6, 128.8, 128.4, 127.9, 127.8, 127.5, 127.2, 126.3, 125.9, 119.6, 114.7, 114.4, 51.2, 36.2, 21.6, one carbon missing due to overlap, overlapped signal at 128.4 ppm; IR (neat) ( $\text{cm}^{-1}$ ) 2929w, 1595m, 1491m, 1335s, 1155s, 1088m; HRMS (ESI):  $m/z$  calcd for  $\text{C}_{27}\text{H}_{26}\text{N}_2\text{O}_2\text{S}_2$  [ $\text{M}+\text{H}$ ] $^+$ : 475.1508; found 475.1506.

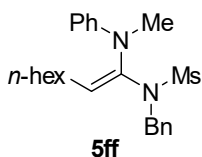

To an oven-dried sealed tube was added secondary amine **4a** (64.3 mg, 0.60 mmol), ynamide **2o** (146.8 mg, 0.50 mmol), DCE (2.5 mL, ynamide *concn* = 0.20 M), and TfOH (8.9  $\mu$ L, 0.10 mmol) at 30 °C. The reaction vessel was capped and stirred at 30 °C for 1.0 h. After the reaction was judged to be complete by TLC, the reaction mixture was cooled to rt, filtered through a pad of silica gel and concentrated in vacuo. After the *E/Z* ratio of the crude product was confirmed by  $^1\text{H}$  NMR spectroscopy, the mixture was purified by flash silica gel column chromatography [gradient eluent: 25:1~15:1 petroleum ether/EtOAc] to afford a 4:1 mixture of ethene-1,1-diamines *E*-**5ff** (149.1 mg, 0.37 mmol) and *Z*-**5ff** (37.3 mg, 0.09 mmol) in 93% yield.

*E*-**5ff** and *Z*-**5ff**:  $R_f$  = 0.29 [10:1 petroleum ether/EtOAc]; colorless oil;  $^1\text{H}$  NMR (400 MHz,  $\text{CDCl}_3$ )  $\delta$  7.40–7.34 (m, 1.0H, minor), 7.33–7.27 (m, 5.0H, major), 7.26–7.23 (m, 0.3H, minor), 7.23–7.17 (m, 2.5H), 7.07–7.04 (m, 0.5H, minor), 6.94–6.90 (m, 0.3H, minor), 6.80–6.75 (m, 3.0H, major), 5.16 (t, 1.0H,  $J$  = 7.1 Hz, major), 4.97 (t, 0.3H,  $J$  = 7.1 Hz, minor), 4.49 (s, 2.0H, major), 4.40 (s, 0.5H,

minor), 2.99 (s, 3.0H, major), 2.90 (s, 0.8H, minor), 2.79 (s, 3.0H, major), 2.63 (s, 0.8H, minor), 2.07 (q, 0.5H,  $J = 7.0$  Hz, minor), 1.78 (q, 2.0H,  $J = 7.1$  Hz, major), 1.31-1.13 (m, 10.0H), 0.89-0.81 (m, 3.8H);  $^{13}\text{C}$  NMR (100 MHz,  $\text{CDCl}_3$ ) (*E*-**5ff**, major):  $\delta$  146.6, 137.4, 136.8, 129.1, 128.6, 128.37, 127.8, 121.5, 118.7, 114.2, 51.4, 41.6, 36.6, 31.5, 28.8, 28.7, 27.5, 22.6, 14.11; (*Z*-**5ff**, minor):  $\delta$  148.4, 138.6, 136.0, 129.3, 129.0, 128.44, 128.0, 121.6, 120.8, 120.1, 51.3, 40.3, 39.7, 31.8, 29.2, 29.1, 28.4, 22.7, 14.15; IR (neat) ( $\text{cm}^{-1}$ ) 2926w, 1660w, 1598m, 1498m, 1337s, 1147s; HRMS (ESI):  $m/z$  calcd for  $\text{C}_{23}\text{H}_{32}\text{N}_2\text{O}_2\text{S}$  [ $\text{M}+\text{H}$ ] $^+$ : 401.2257; found 401.2257.

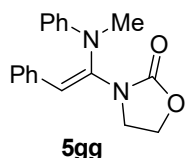

To an oven-dried sealed tube was added secondary amine **4a** (64.3 mg, 0.60 mmol), ynamide **2q** (93.6 mg, 0.50 mmol), DCE (2.5 mL, ynamide *concn* = 0.20 M), and TfOH (8.9  $\mu\text{L}$ , 0.10 mmol) at 80 °C. The reaction vessel was capped and stirred at 80 °C for 7.0 h. After the reaction was judged to be complete by TLC, the reaction mixture was cooled to rt, filtered through a pad of silica gel and concentrated in vacuo. After the *E/Z* ratio of the crude product was confirmed by  $^1\text{H}$  NMR spectroscopy, the mixture was purified by flash silica gel column chromatography [gradient eluent: 10:1~2:1 petroleum ether/EtOAc] to afford a 7:1 mixture of ethene-1,1-diamines *E*-**5gg** (104.7 mg, 0.36 mmol) and *Z*-**5gg** (15.0 mg, 0.05 mmol) in 81% yield.

*E*-**5gg** and *Z*-**5gg**:  $R_f = 0.15$  [4:1 petroleum ether/EtOAc]; white solid; mp = 101–102 °C;  $^1\text{H}$  NMR (400 MHz,  $\text{CDCl}_3$ )  $\delta$  7.31-7.20 (m, 7.0H), 7.17-7.13 (m, 1.0H, major), 7.07 (d, 0.3H,  $J = 8.0$  Hz, minor), 7.01 (t, 0.1H,  $J = 7.2$  Hz, minor), 6.92-6.87 (m, 3.0H, major), 6.28 (s, 1.0H, major), 5.83 (s, 0.1H, minor), 4.19 (t, 2.0H,  $J = 7.6$  Hz, major), 4.13 (t, 0.3H,  $J = 7.8$  Hz, minor), 3.54 (t, 2.3H,  $J = 7.7$  Hz), 3.29 (s, 0.4H, minor), 3.07 (s, 3.0H, major);  $^{13}\text{C}$  NMR (100 MHz,  $\text{CDCl}_3$ ) (*E*-**5gg**, major):  $\delta$  156.3, 145.1, 135.9, 134.7, 129.6, 128.6, 127.7, 127.1, 119.8, 115.5, 114.5, 61.6, 44.3, 38.2; (*Z*-**5gg**, minor):  $\delta$  155.2, 146.3, 137.7, 136.1, 129.4, 128.7, 127.2, 126.2, 122.8, 120.9, 109.8, 62.2, 44.8, 40.8; IR (neat) ( $\text{cm}^{-1}$ ) 2954w, 1764s, 1594m, 1493m, 1400s, 1271m, 1080w; HRMS (ESI):  $m/z$  calcd for  $\text{C}_{18}\text{H}_{18}\text{N}_2\text{O}_2$  [ $\text{M}+\text{H}$ ] $^+$ : 295.1441; found 295.1441.

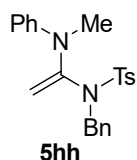

To an oven-dried sealed tube was added secondary amine **4a** (64.3 mg, 0.60 mmol), ynamide **2s** (142.7 mg, 0.50 mmol), DCE (2.5 mL, ynamide *concn* = 0.20 M), and TfOH (8.9  $\mu\text{L}$ , 0.10 mmol) at 30 °C. The reaction vessel was capped and stirred at 30 °C for 1.0 h. After the reaction was judged to be complete by TLC, the reaction mixture was cooled to rt, filtered through a pad of silica gel,

concentrated in vacuo, and purified by flash silica gel column chromatography [gradient eluent: 30:1~20:1 petroleum ether/EtOAc] to afford ethene-1,1-diamine **5hh** (150.2 mg, 0.38 mmol) in 77% yield.

**5hh**:  $R_f = 0.42$  [10:1 petroleum ether/EtOAc]; colorless oil;  $^1\text{H}$  NMR (400 MHz,  $\text{CDCl}_3$ )  $\delta$  7.67 (d, 2H,  $J = 8.3$  Hz), 7.29-7.23 (m, 7H), 7.16-7.12 (m, 2H), 6.92-6.88 (m, 1H), 6.82 (dd, 2H,  $J = 8.8, 1.3$  Hz), 4.55 (s, 2H), 4.41 (d, 1H,  $J = 1.5$  Hz), 4.31 (d, 1H,  $J = 1.5$  Hz), 2.70 (s, 3H), 2.41 (s, 3H);  $^{13}\text{C}$  NMR (100 MHz,  $\text{CDCl}_3$ )  $\delta$  147.2, 147.0, 143.7, 137.2, 136.5, 129.5, 128.92, 128.87, 128.4, 128.1, 127.8, 121.9, 120.7, 96.1, 52.3, 37.8, 21.7; IR (neat) ( $\text{cm}^{-1}$ ) 2924w, 1627m, 1596m, 1495s, 1344s, 1157s, 1089m; HRMS (ESI):  $m/z$  calcd for  $\text{C}_{23}\text{H}_{24}\text{N}_2\text{O}_2\text{S}$   $[\text{M}+\text{H}]^+$ : 393.1631; found 393.1631.

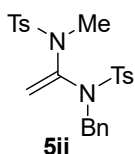

To an oven-dried sealed tube was added secondary amine **4q** (111.2 mg, 0.60 mmol), ynamide **2s** (142.7 mg, 0.50 mmol), DCE (2.5 mL, ynamide *concn* = 0.20 M), and TfOH (8.9  $\mu\text{L}$ , 0.10 mmol) at 30 °C. The reaction vessel was capped and stirred at 30 °C for 1.0 h. After the reaction was judged to be complete by TLC, the reaction mixture was cooled to rt, filtered through a pad of silica gel, concentrated in vacuo, and purified by flash silica gel column chromatography [gradient eluent: 12:1~8:1 petroleum ether/EtOAc] to afford ethene-1,1-diamine **5ii** (190.5 mg, 0.40 mmol) in 81% yield.

**5ii**:  $R_f = 0.42$  [4:1 petroleum ether/EtOAc]; white solid; mp = 113–114 °C;  $^1\text{H}$  NMR (400 MHz,  $\text{CDCl}_3$ )  $\delta$  7.73 (d, 2H,  $J = 8.3$  Hz), 7.51 (d, 2H,  $J = 8.3$  Hz), 7.37-7.28 (m, 7H), 7.23 (d, 2H,  $J = 8.1$  Hz), 4.81 (d, 1H,  $J = 2.0$  Hz), 4.75 (s, 2H), 4.29 (d, 1H,  $J = 2.0$  Hz), 2.66 (s, 3H), 2.43 (s, 3H), 2.40 (s, 3H);  $^{13}\text{C}$  NMR (100 MHz,  $\text{CDCl}_3$ )  $\delta$  144.2, 144.0, 141.6, 136.7, 136.6, 133.3, 129.53, 129.49, 128.9, 128.6, 128.4, 127.8, 107.3, 52.1, 37.7, 21.8, 21.7, one carbon missing due to overlap, overlapped signal at 128.6 ppm; IR (neat) ( $\text{cm}^{-1}$ ) 2925w, 1628w, 1344s, 1233m, 1157s, 1086m; HRMS (ESI):  $m/z$  calcd for  $\text{C}_{24}\text{H}_{26}\text{N}_2\text{O}_4\text{S}_2$   $[\text{M}+\text{H}]^+$ : 471.1407; found 471.1406.

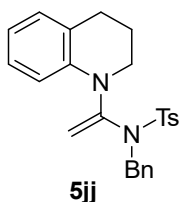

To an oven-dried sealed tube was added secondary amine **4o** (79.9 mg, 0.60 mmol), ynamide **2s** (142.7 mg, 0.50 mmol), DCE (2.5 mL, ynamide *concn* = 0.20 M), and TfOH (8.9  $\mu\text{L}$ , 0.10 mmol) at 30 °C. The reaction vessel was capped and stirred at 30 °C for 1.0 h. After the reaction was judged to be complete by TLC, the reaction mixture was cooled to rt, filtered through a pad of silica gel,

concentrated in vacuo, and purified by flash silica gel column chromatography [gradient eluent: 30:1~25:1 petroleum ether/EtOAc] to afford ethene-1,1-diamine **5jj** (171.9 mg, 0.41 mmol) in 82% yield.

**5jj**:  $R_f = 0.38$  [10:1 petroleum ether/EtOAc]; colorless oil;  $^1\text{H NMR}$  (400 MHz,  $\text{CDCl}_3$ )  $\delta$  7.71 (d, 2H,  $J = 8.4$  Hz), 7.28-7.23 (m, 7H), 6.94 (dd, 1H,  $J = 7.6, 1.6$  Hz), 6.85-6.81 (m, 1H), 6.73-6.69 (m, 1H), 6.65 (dd, 1H,  $J = 8.3, 1.3$  Hz), 4.67 (s, 2H), 4.59 (d, 1H,  $J = 1.4$  Hz), 4.43 (d, 1H,  $J = 1.4$  Hz), 2.96-2.93 (m, 2H), 2.62 (t, 2H,  $J = 6.6$  Hz), 2.40 (s, 3H), 1.57-1.51 (m, 2H);  $^{13}\text{C NMR}$  (100 MHz,  $\text{CDCl}_3$ )  $\delta$  146.7, 143.6, 142.7, 137.4, 136.8, 129.5, 129.4, 128.7, 128.4, 127.9, 127.6, 126.7, 126.1, 120.4, 120.1, 98.4, 51.8, 46.4, 27.4, 21.6, 21.0; IR (neat) ( $\text{cm}^{-1}$ ) 2935w, 1597m, 1493s, 1346s, 1157s, 1090m; HRMS (ESI):  $m/z$  calcd for  $\text{C}_{25}\text{H}_{26}\text{N}_2\text{O}_2\text{S}$   $[\text{M}+\text{H}]^+$ : 419.1788; found 419.1780.

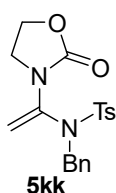

To an oven-dried sealed tube was added secondary amine **4r** (52.2 mg, 0.60 mmol), ynamide **2s** (142.7 mg, 0.50 mmol), DCE (2.5 mL, ynamide *concn* = 0.20 M), and TfOH (8.9  $\mu\text{L}$ , 0.10 mmol) at 30 °C. The reaction vessel was capped and stirred at 30 °C for 1.0 h. After the reaction was judged to be complete by TLC, the reaction mixture was cooled to rt, filtered through a pad of silica gel, concentrated in vacuo, and purified by flash silica gel column chromatography [gradient eluent: 10:1~2:1 petroleum ether/EtOAc] to afford ethene-1,1-diamine **5kk** (122.0 mg, 0.33 mmol) in 66% yield.

**5kk**:  $R_f = 0.42$  [2:1 petroleum ether/EtOAc]; yellow solid; mp = 132–133 °C;  $^1\text{H NMR}$  (400 MHz,  $\text{CDCl}_3$ )  $\delta$  7.77 (d, 2H,  $J = 8.4$  Hz), 7.36-7.32 (m, 7H), 5.41 (d, 1H,  $J = 2.0$  Hz), 4.43 (d, 1H,  $J = 2.0$  Hz), 4.41 (s, 2H), 4.06 (t, 2H,  $J = 7.8$  Hz), 3.45 (t, 2H,  $J = 7.8$  Hz), 2.45 (s, 3H);  $^{13}\text{C NMR}$  (100 MHz,  $\text{CDCl}_3$ )  $\delta$  155.5, 144.4, 137.2, 134.8, 133.8, 129.7, 129.6, 128.6, 128.5, 128.3, 105.4, 61.7, 55.1, 44.1, 21.7; IR (neat) ( $\text{cm}^{-1}$ ) 2920w, 1763s, 1639m, 1454w, 1345s, 1221m, 1160s, 1048m; HRMS (ESI):  $m/z$  calcd for  $\text{C}_{19}\text{H}_{20}\text{N}_2\text{O}_4\text{S}$   $[\text{M}+\text{H}]^+$ : 373.1217; found 373.1215.

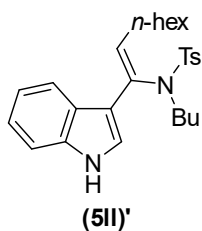

To an oven-dried sealed tube was added secondary amine **4p** (70.5 mg, 0.60 mmol), ynamide **2t**<sup>1</sup> (167.8 mg, 0.50 mmol), DCE (2.5 mL, ynamide *concn* = 0.20 M), and TfOH (8.9  $\mu\text{L}$ , 0.10 mmol) at

30 °C. The reaction vessel was capped and stirred at 30 °C for 1.0 h. After the reaction was judged to be complete by TLC, the reaction mixture was cooled to rt, filtered through a pad of silica gel and concentrated in vacuo. After the *Z/E* ratio of the crude product was confirmed by <sup>1</sup>H NMR spectroscopy, the mixture was purified by flash silica gel column chromatography [gradient eluent: 15:1~4:1 petroleum ether/EtOAc] to afford a 2:1 mixture of 3-alkenylindoles *Z*-(**5II**)' (108.2 mg, 0.24 mmol) and *E*-(**5II**)' (54.1 mg, 0.12 mmol) in 72% yield.

*Z*-(**5II**)' and *E*-(**5II**)': *R<sub>f</sub>* = 0.40 [4:1 petroleum ether/EtOAc]; white solid; mp = 114–115 °C; <sup>1</sup>H NMR (400 MHz, CD<sub>2</sub>Cl<sub>2</sub>) δ 8.63 (s, 0.5H, minor), 8.52 (s, 1.0H, major), 7.84 (d, 1.0H, *J* = 7.4 Hz, major), 7.80 (d, 2.0H, *J* = 6.7 Hz, major), 7.76 (d, 1.0H, *J* = 6.6 Hz, minor), 7.52 (d, 0.5H, *J* = 8.0 Hz, minor), 7.38-7.32 (m, 4.5H), 7.22-7.13 (m, 3.0H), 6.89-6.87 (m, 1.5H), 6.18 (t, 1.0H, *J* = 7.4 Hz, major), 5.63 (t, 0.5H, *J* = 7.5 Hz, minor), 3.41-3.31 (m, 3.0H), 2.46 (s, 4.5H), 2.12-2.03 (m, 3.0H), 1.54-1.46 (m, 4.0H), 1.37-1.18 (m, 14.0H), 0.95 (t, 3.0H, *J* = 6.4 Hz, major), 0.89-0.81 (m, 6.0H); <sup>13</sup>C NMR (100 MHz, CD<sub>2</sub>Cl<sub>2</sub>) (*Z*-(**5II**)', major): δ 143.8, 138.32, 137.1, 132.3, 130.6, 129.9, 127.8, 125.8, 124.6, 122.5, 120.5, 120.1, 115.1, 111.9, 49.4, 32.1, 31.4, 29.9, 29.8, 29.52, 23.04, 21.6, 20.4, 14.3, 13.9; (*E*-(**5II**)', minor): δ 143.6, 138.28, 136.0, 133.2, 130.0, 129.7, 127.9, 127.3, 125.2, 122.2, 120.3, 120.2, 112.4, 111.7, 48.7, 32.0, 31.0, 29.47, 29.2, 22.96, 20.0, 14.2, 13.8, two carbon missing due to overlap, overlapped signal at 29.8 ppm and 21.6 ppm. Spectral data are in agreement with literature values<sup>21</sup>.

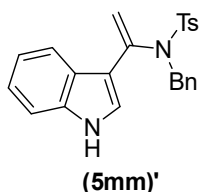

To an oven-dried sealed tube was added secondary amine **4p** (70.5 mg, 0.60 mmol), ynamide **2s** (142.7 mg, 0.50 mmol), DCE (2.5 mL, ynamide *concn* = 0.20 M), and TfOH (8.9 μL, 0.10 mmol) at 30 °C. The reaction vessel was capped and stirred at 30 °C for 1.0 h. After the reaction was judged to be complete by TLC, the reaction mixture was cooled to rt, filtered through a pad of silica gel, concentrated in vacuo, and purified by flash silica gel column chromatography [gradient eluent: 12:1~4:1 petroleum ether/EtOAc] to afford 3-alkenylindole (**5mm**)' (145.4 mg, 0.36 mmol) in 72% yield.

**(5mm)**': *R<sub>f</sub>* = 0.26 [4:1 petroleum ether/EtOAc]; colorless oil; <sup>1</sup>H NMR (400 MHz, CDCl<sub>3</sub>) δ 8.58 (s, 1H), 7.75 (d, 2H, *J* = 8.3 Hz), 7.65-7.63 (m, 1H), 7.26-7.22 (m, 3H), 7.20-7.17 (m, 2H), 7.16-7.12 (m, 3H), 7.10-7.06 (m, 2H), 6.94 (d, 1H, *J* = 2.7 Hz), 5.50 (s, 1H), 4.82 (s, 1H), 4.61 (s, 2H), 2.36 (s, 3H); <sup>13</sup>C NMR (100 MHz, CDCl<sub>3</sub>) δ 143.6, 140.0, 136.9, 136.47, 136.45, 129.6, 129.2, 128.3, 128.0, 127.7, 125.8, 125.1, 122.3, 120.5, 119.7, 114.5, 112.0, 111.7, 53.8, 21.6; IR (neat) (cm<sup>-1</sup>) 2922w,

1620m, 1435m, 1319s, 1209w, 1154s, 1093s, 1036m; HRMS (ESI):  $m/z$  calcd for  $C_{24}H_{22}N_2O_2S$   $[M+H]^+$ : 403.1475; found 403.1468.

## 1.7 Application to the Construction of 2-Aminoindoles (Scheme 2).

Synthesis of 2-Aminoindole **6a**, **6b** and **6c** via a Pd(0)-catalyzed ring closing reaction.<sup>18</sup>

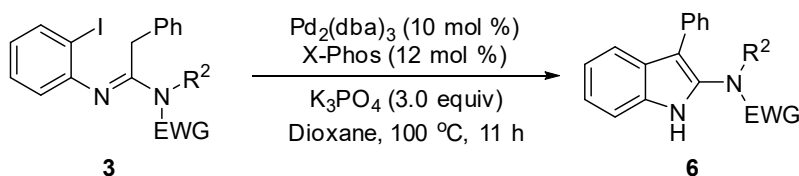

To an oven-dried sealed tube was added *N*-arylimine **300** (116.1 mg, 0.20 mmol), XPhos (11.5 mg, 12 mol %),  $Pd_2(dba)_3$  (18.4 mg, 10 mol %),  $K_3PO_4$  (127.4 mg, 0.60 mmol) and dioxane (0.8 mL) in sequence. The reaction vessel was capped and stirred at 100 °C in an oil bath for 11.0 h. After the reaction was judged to be complete by TLC, the reaction mixture was cooled to rt, filtered through a pad of silica gel, concentrated in vacuo, and purified by flash silica gel column chromatography [gradient eluent: 15:1~4:1 petroleum ether/EtOAc] to afford 2-aminoindole **6a** (69.1 mg, 0.15 mmol) in 76% yield.

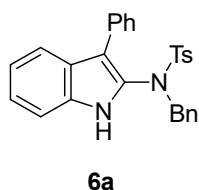

**6a**:  $R_f$  = 0.42 [2:1 petroleum ether/EtOAc]; white solid; mp = 193–194 °C;  $^1H$  NMR (400 MHz,  $CDCl_3$ )  $\delta$  8.54 (s, 1H), 7.64-7.61 (m, 2H), 7.48 (d, 1H,  $J$  = 8.0 Hz), 7.28 (d, 3H,  $J$  = 8.1 Hz), 7.23-7.14 (m, 7H), 7.08-7.03 (m, 3H), 6.63-6.60 (m, 2H), 4.52 (s, 2H), 2.44 (s, 3H);  $^{13}C$  NMR (100 MHz,  $CDCl_3$ )  $\delta$  144.4, 136.3, 135.7, 133.4, 133.2, 130.1, 129.3, 128.55, 128.48, 128.47, 127.99, 127.97, 127.7, 127.0, 126.6, 123.1, 120.2, 119.6, 112.7, 111.2, 53.7, 21.8. Spectral data are in agreement with literature values<sup>22</sup>.

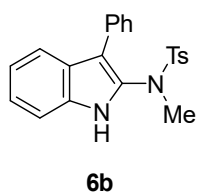

To an oven-dried sealed tube was added imine **3pp** (100.9 mg, 0.20 mmol), XPhos (11.5 mg, 12 mol %),  $Pd_2(dba)_3$  (18.4 mg, 10 mol %),  $K_3PO_4$  (127.4 mg, 0.60 mmol) and dioxane (0.8 mL) in sequence. The reaction vessel was capped and stirred at 100 °C in an oil bath for 11.0 h. After the reaction was judged to be complete by TLC, the reaction mixture was cooled to rt, filtered through a

pad of silica gel, concentrated in vacuo, and purified by flash silica gel column chromatography [gradient eluent: 10:1~4:1 petroleum ether/EtOAc] to afford 2-aminoindole **6b** (59.9 mg, 0.16 mmol) in 80% yield.

**6b**:  $R_f = 0.48$  [4:1 petroleum ether/EtOAc]; white solid; mp = 181–182 °C;  $^1\text{H NMR}$  (400 MHz,  $\text{CDCl}_3$ )  $\delta$  8.77 (s, 1H), 7.56 (d, 2H,  $J = 7.9$  Hz), 7.48 (d, 1H,  $J = 8.0$  Hz), 7.38 (d, 1H,  $J = 8.1$  Hz), 7.26–7.22 (m, 3H), 7.18 (d, 1H,  $J = 7.1$  Hz), 7.15–7.07 (m, 3H), 6.65 (d, 2H,  $J = 7.1$  Hz), 3.04 (s, 3H), 2.43 (s, 3H);  $^{13}\text{C NMR}$  (100 MHz,  $\text{CDCl}_3$ )  $\delta$  144.4, 134.2, 133.3, 133.2, 130.5, 130.0, 129.4, 128.3, 127.7, 126.82, 126.80, 123.2, 120.3, 119.5, 111.5, 111.1, 38.5, 21.8. Spectral data are in agreement with literature values<sup>22</sup>.

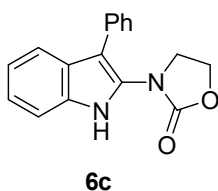

To an oven-dried sealed tube was added imine **3uu** (81.3 mg, 0.20 mmol), XPhos (11.5 mg, 12 mol %),  $\text{Pd}_2(\text{dba})_3$  (18.4 mg, 10 mol %),  $\text{K}_3\text{PO}_4$  (127.4 mg, 0.60 mmol) and dioxane (0.8 mL) in sequence. The reaction vessel was capped and stirred at 100 °C in an oil bath for 11.0 h. After the reaction was judged to be complete by TLC, the reaction mixture was cooled to rt, filtered through a pad of silica gel, concentrated in vacuo, and purified by flash silica gel column chromatography [gradient eluent: 10:1~4:1 petroleum ether/EtOAc] to afford 2-aminoindole **6c** (43.9 mg, 0.16 mmol) in 79% yield.

**6c**:  $R_f = 0.31$  [2:1 petroleum ether/EtOAc]; white solid; mp = 181–182 °C;  $^1\text{H NMR}$  (400 MHz,  $\text{CDCl}_3$ )  $\delta$  9.90 (s, 1H), 7.48–7.40 (m, 5H), 7.37–7.32 (m, 2H), 7.20–7.16 (m, 1H), 7.10–7.06 (m, 1H), 4.36 (t, 2H,  $J = 7.6$  Hz), 3.66 (t, 2H,  $J = 8.0$  Hz);  $^{13}\text{C NMR}$  (100 MHz,  $\text{CDCl}_3$ )  $\delta$  156.9, 133.8, 132.3, 130.8, 129.1, 128.5, 127.6, 127.2, 122.2, 120.4, 118.6, 110.9, 104.8, 63.2, 46.0. Spectral data are in agreement with literature values<sup>18</sup>.

#### Synthesis of 2-Aminoindole **6a** via $\text{CuCl}_2$ -mediated oxidative cyclization.<sup>22</sup>

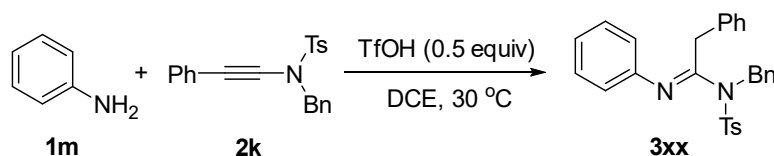

To an oven-dried sealed tube was added aniline **1m** (111.8 mg, 1.20 mmol), ynamide **2k** (361.5 mg, 1.00 mmol), DCE (2.5 mL, ynamide *concn* = 0.40 M), and TfOH (44.2  $\mu\text{L}$ , 0.50 mmol) at 30 °C. The reaction vessel was capped and stirred at 30 °C for 9.0 h. After the reaction was judged to be complete by TLC, the reaction mixture was cooled to rt, filtered through a pad of silica gel,

concentrated in vacuo, and purified by flash silica gel column chromatography [gradient eluent: 30:1~25:1 petroleum ether/EtOAc] to afford imine **3xx** (334.5 mg, 0.74 mmol) in 74% yield.

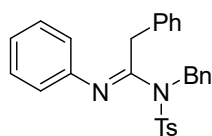

**3xx**

**3xx**:  $R_f = 0.40$  [10:1 petroleum ether/EtOAc]; white solid; mp = 94–95 °C;  $^1\text{H}$  NMR (400 MHz,  $\text{CDCl}_3$ )  $\delta$  7.74 (d, 2H,  $J = 8.3$  Hz), 7.34 (d, 2H,  $J = 8.2$  Hz), 7.25-7.19 (m, 3H), 7.16-7.13 (m, 3H), 7.11-7.07 (m, 2H), 7.03-6.99 (m, 3H), 6.79-6.77 (m, 2H), 6.43-6.41 (m, 2H), 4.65 (s, 2H), 3.87 (s, 2H), 2.46 (s, 3H);  $^{13}\text{C}$  NMR (100 MHz,  $\text{CDCl}_3$ )  $\delta$  155.8, 148.2, 144.3, 136.0, 135.5, 134.9, 129.7, 129.3, 129.2, 129.0, 128.5, 128.3, 128.2, 127.4, 126.6, 123.7, 119.6, 51.2, 37.9, 21.8. Spectral data are in agreement with literature values<sup>22</sup>.

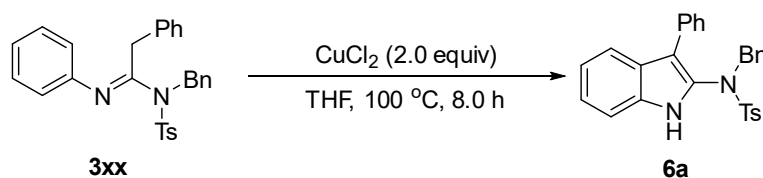

To an oven-dried flask were charged with imine **3xx** (181.8 mg, 0.40 mmol),  $\text{CuCl}_2$  (107.6 mg, 0.80 mmol) and THF (4.0 mL) in sequence. The mixture was vigorously stirred and refluxed for 8.0 h. After the reaction was judged to be complete by TLC, the reaction mixture was cooled to rt, filtered through a pad of silica gel, concentrated in vacuo, and purified by flash silica gel column chromatography [gradient eluent: 15:1~4:1 petroleum ether/EtOAc] to afford 2-aminoindole **6a** (117.3 mg, 0.26 mmol) in 65% yield.

## 1.8 X-Ray Crystal Structure of **5f**.

The relative configuration of the **5f** was determined by X-ray. The crystal was obtained by slow evaporation of the solution of **5f** in petroleum ether/acetone (4:1) at room temperature.

A colorless crystal of approximate dimensions 0.22 x 0.10 x 0.07 mm was selected and collected by an Agilent Xcalibur Eos Gemini diffractometer. The crystal was kept at 293 K during data collection. The structure was solved by direct methods using Olex2 software with the SHELXS structure solution program. The found structural model was further refined by full-matrix least-squares on F2 with SHELXL.



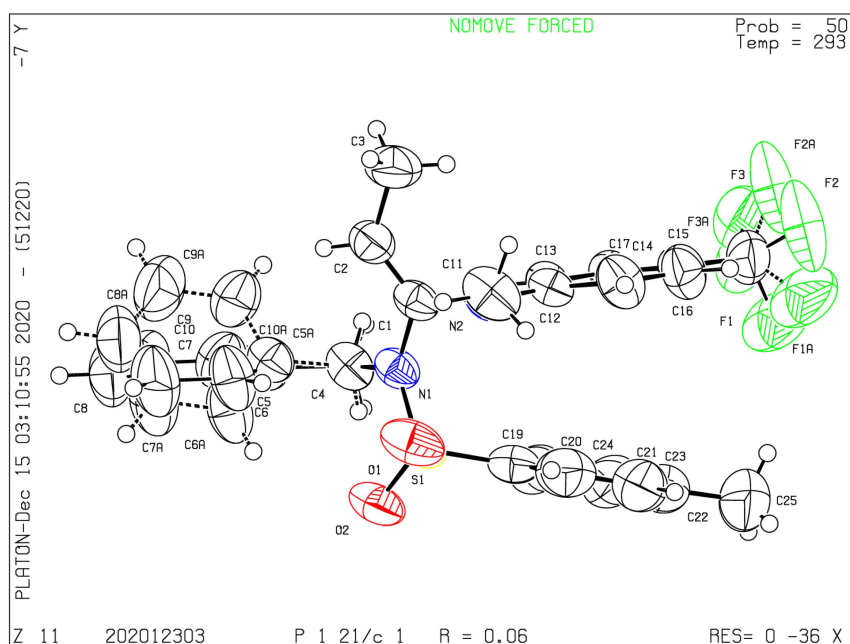

**Figure S1.** The thermal ellipsoid plot of **5f**.

**Table S3 Crystal data and structure refinement for 5f.**

|                                             |                                                                                |
|---------------------------------------------|--------------------------------------------------------------------------------|
| Empirical formula                           | C <sub>25</sub> H <sub>25</sub> F <sub>3</sub> N <sub>2</sub> O <sub>2</sub> S |
| Formula weight                              | 474.53                                                                         |
| Temperature/K                               | 293(2)                                                                         |
| Crystal system                              | monoclinic                                                                     |
| Space group                                 | P2 <sub>1</sub> /c                                                             |
| a/Å                                         | 24.1413(7)                                                                     |
| b/Å                                         | 8.2624(2)                                                                      |
| c/Å                                         | 12.0011(3)                                                                     |
| α/°                                         | 90                                                                             |
| β/°                                         | 90.446(3)                                                                      |
| γ/°                                         | 90                                                                             |
| Volume/Å <sup>3</sup>                       | 2393.74(11)                                                                    |
| Z                                           | 4                                                                              |
| ρ <sub>calc</sub> /cm <sup>3</sup>          | 1.317                                                                          |
| μ/mm <sup>-1</sup>                          | 1.618                                                                          |
| F(000)                                      | 992.0                                                                          |
| Crystal size/mm <sup>3</sup>                | 0.22 × 0.1 × 0.07                                                              |
| Radiation                                   | CuKα (λ = 1.54184)                                                             |
| 2 <sup>θ</sup> range for data collection/°  | 7.324 to 134.142                                                               |
| Index ranges                                | -28 ≤ h ≤ 28, -9 ≤ k ≤ 9, -14 ≤ l ≤ 12                                         |
| Reflections collected                       | 9090                                                                           |
| Independent reflections                     | 4276 [R <sub>int</sub> = 0.0250, R <sub>sigma</sub> = 0.0312]                  |
| Data/restraints/parameters                  | 4276/54/306                                                                    |
| Goodness-of-fit on F <sup>2</sup>           | 1.021                                                                          |
| Final R indexes [I ≥ 2σ (I)]                | R <sub>1</sub> = 0.0568, wR <sub>2</sub> = 0.1574                              |
| Final R indexes [all data]                  | R <sub>1</sub> = 0.0748, wR <sub>2</sub> = 0.1757                              |
| Largest diff. peak/hole / e Å <sup>-3</sup> | 0.29/-0.35                                                                     |

## References

- (1) Y. Zhang, R. P. Hsung, M. R. Tracey, K. C. M. Kurtz and E. L. Vera, Copper sulfate-pentahydrate-1,10-phenanthroline catalyzed amidations of alkynyl bromides. Synthesis of heteroaromatic amine substituted ynarnides. *Org. Lett.*, 2004, **6**, 1151.
- (2) H. Li, R. P. Hsung, K. A. DeKorver and Y. Wei, Copper-catalyzed ficini [2 + 2] cycloaddition of ynarnides. *Org. Lett.*, 2010, **12**, 3780.
- (3) Y. Yang, H. Liu, C. Peng, J. Wu, J. Zhang, Y. Qiao, X.-N. Wang and J. Chang, AlCl<sub>3</sub>-catalyzed annulations of ynarnides involving a torquoselective process for the simultaneous control of central and axial chirality. *Org. Lett.*, 2016, **18**, 5022.
- (4) H. Liu, Y. Yang, S. Wang, J. Wu, X.-N. Wang and J. Chang, Synthesis of 3-substituted 2-aminochromones via Sn(IV)-promoted annulation of ynarnides with 2-methoxyaroyl chlorides. *Org. Lett.*, 2015, **17**, 4472.
- (5) X. Y. Mak, A. L. Crombie and R. L. Danheiser, Synthesis of polycyclic benzofused nitrogen heterocycles via a tandem ynarnide benzannulation/ring-closing metathesis strategy. Application in a formal total synthesis of (+)-FR900482. *J. Org. Chem.*, 2011, **76**, 1852.
- (6) S. J. Mansfield, C. D. Campbell, M. W. Jones and E. A. Anderson, A robust and modular synthesis of ynarnides. *Chem. Comm.*, 2015, **51**, 3316.
- (7) K. Wang, R. Ran, S. Xiu, and C. Li, Synthesis of 3-aza-bicyclo[3.1.0]hexan-2-one derivatives via gold-catalyzed oxidative cyclopropanation of *N*-allylarnides. *Org. Lett.*, 2013, **15**, 2374.
- (8) H. Liu, Y. Yang, J. Wu, X.-N. Wang and J. Chang, Regioselective synthesis of 3,4-disubstituted isocoumarins through the Pd-catalyzed annulation of 2-iodoaromatic acids with ynarnides. *Chem. Commun.*, 2016, **52**, 6801.
- (9) L. Zhu, Y. Yu, Z. Mao and X. Huang, Gold-catalyzed intermolecular nitrene transfer from 2*H*-azirines to ynarnides: A direct approach to polysubstituted pyrroles. *Org. Lett.*, 2014, **17**, 30.
- (10) M. D. Santos and P. W. Davies, A gold-catalysed fully intermolecular oxidation and sulfur-ylide formation sequence on ynarnides. *Chem. Commun.*, 2014, **50**, 6001.
- (11) A. Coste, G. Karthikeyan, F. Couty and G. Evano, Copper-mediated coupling of 1,1-dibromo-1-alkenes with nitrogen nucleophiles: A general method for the synthesis of ynarnides. *Angew. Chem. Int. Ed.*, 2009, **48**, 4381.
- (12) B. Yao, Z. Liang, T. Niu and Y. Zhang, Iron-catalyzed amidation of alkynyl bromides: A facile route for the preparation of ynarnides. *J. Org. Chem.*, 2009, **74**, 4630.
- (13) P. Starkov, J. T. Moore, D. C. Duquette, B. M. Stoltz and I. Marek, Enantioselective construction of acyclic quaternary carbon stereocenters: palladium-catalyzed decarboxylative allylic alkylation of fully-substituted amide enolates. *J. Am. Chem. Soc.*, 2017, **139**, 9615.
- (14) K. Dooleweerd, H. Birkedal, T. Ruhland and T. Skrydstrup, Irregularities in the effect of potassium phosphate in ynarnide synthesis. *J. Org. Chem.*, 2008, **73**, 9447.
- (15) M. R. Tracey, Y. Zhang, M. O. Frederick, J. A. Mulder and R. P. Hsung, Sonogashira cross-couplings of ynarnides. syntheses of urethane- and sulfonamide-terminated conjugated phenylacetylenic systems. *Org. Lett.*, 2004, **6**, 2209.
- (16) B. Witulski and T. Stengel, *N*-Functionalized 1-alkynylarnides: New building blocks for transition metal mediated inter- and intramolecular [2 + 2 + 1] cycloadditions. *Angew. Chem. Int. Ed.*, 1998, **37**, 489.
- (17) S. Kramer, K. Dooleweerd, A. T. Lindhardt, M. Rottländer and T. Skrydstrup, Highly regioselective Au(I)-catalyzed hydroamination of ynarnides and propiolic acid derivatives with anilines. *Org. Lett.*, 2009, **11**, 4208.
- (18) D. Liu, Q. Nie, R. Zhang and M. Cai, Regiospecific hydroamination of unsymmetrical electron-rich and electron-poor alkynes with anilines catalyzed by gold(I) immobilized in MCM-41. *Adv. Synth. Catal.*, 2018, **360**, 3940.
- (19) X.-D. Nie, X.-L. Han, J.-T. Sun, C.-M. Si, B.-G. Wei and G.-Q. Lin, Nickel-catalyzed regioselective hydroamination of ynarnides with secondary amines. *J. Org. Chem.*, 2021, **86**, 3433.
- (20) L. Li, C. Shu, B. Zhou, Y.-F. Yu, X.-Y. Xiao and L.-W. Ye, Generation of gold carbenes in water: efficient intermolecular trapping of the  $\alpha$ -oxo gold carbenoids by indoles and anilines. *Chem. Sci.*, 2014, **5**, 4057.
- (21) Y. Zhang, Synthesis of vinylpyrroles, vinylfurans and vinylindoles via a Brønsted acid catalyzed highly regio- and stereoselective cis-hydroarylation of ynarnides. *Tetrahedron*, 2006, **62**, 3917.
- (22) Y. H. Kim, H. J. Yoo and S. W. Youn, Facile one-pot synthesis of 2-aminoindoles from simple anilines and ynarnides. *Chem. Comm.*, 2020, **56**, 13963.

## SUPPORTING INFORMATION

### Nonmetal-Catalyzed Hydroamination of Ynamides with Amines

Yanru Wang, Zhen Zhao, Songkui Lv, Lixia Ding, Xiao-Na Wang,\* and Junbiao Chang\*

*Collaborative Innovation Center of New Drug Research and Safety Evaluation, Henan Province, Key Laboratory of Advanced Drug Preparation Technologies, Ministry of Education, School of Pharmaceutical Sciences, Zhengzhou University, Zhengzhou, Henan 450001, P. R. China.*

#### Table of Contents

|                                                                                         |      |
|-----------------------------------------------------------------------------------------|------|
| Part II Copies of $^1\text{H}$ NMR and $^{13}\text{C}$ NMR Spectra. ....                | S59  |
| $^1\text{H}$ NMR and $^{13}\text{C}$ NMR Spectra of Ynamide <b>2r</b> .....             | S59  |
| $^1\text{H}$ NMR and $^{13}\text{C}$ NMR Spectra of <i>N</i> -Arylimines <b>3</b> ..... | S61  |
| $^1\text{H}$ NMR and $^{13}\text{C}$ NMR Spectra of Ethene-1,1-Diamines <b>5</b> .....  | S159 |
| $^1\text{H}$ NMR and $^{13}\text{C}$ NMR Spectra of 2-Aminoindoles <b>6</b> .....       | S239 |
| NOESY Spectra of 3-Alkenylindoles ( <b>5p</b> )' and ( <b>5ll</b> )'.....               | S247 |

## Part II Copies of $^1\text{H}$ NMR and $^{13}\text{C}$ NMR Spectra.

### $^1\text{H}$ NMR and $^{13}\text{C}$ NMR Spectra of Ynamide 2r

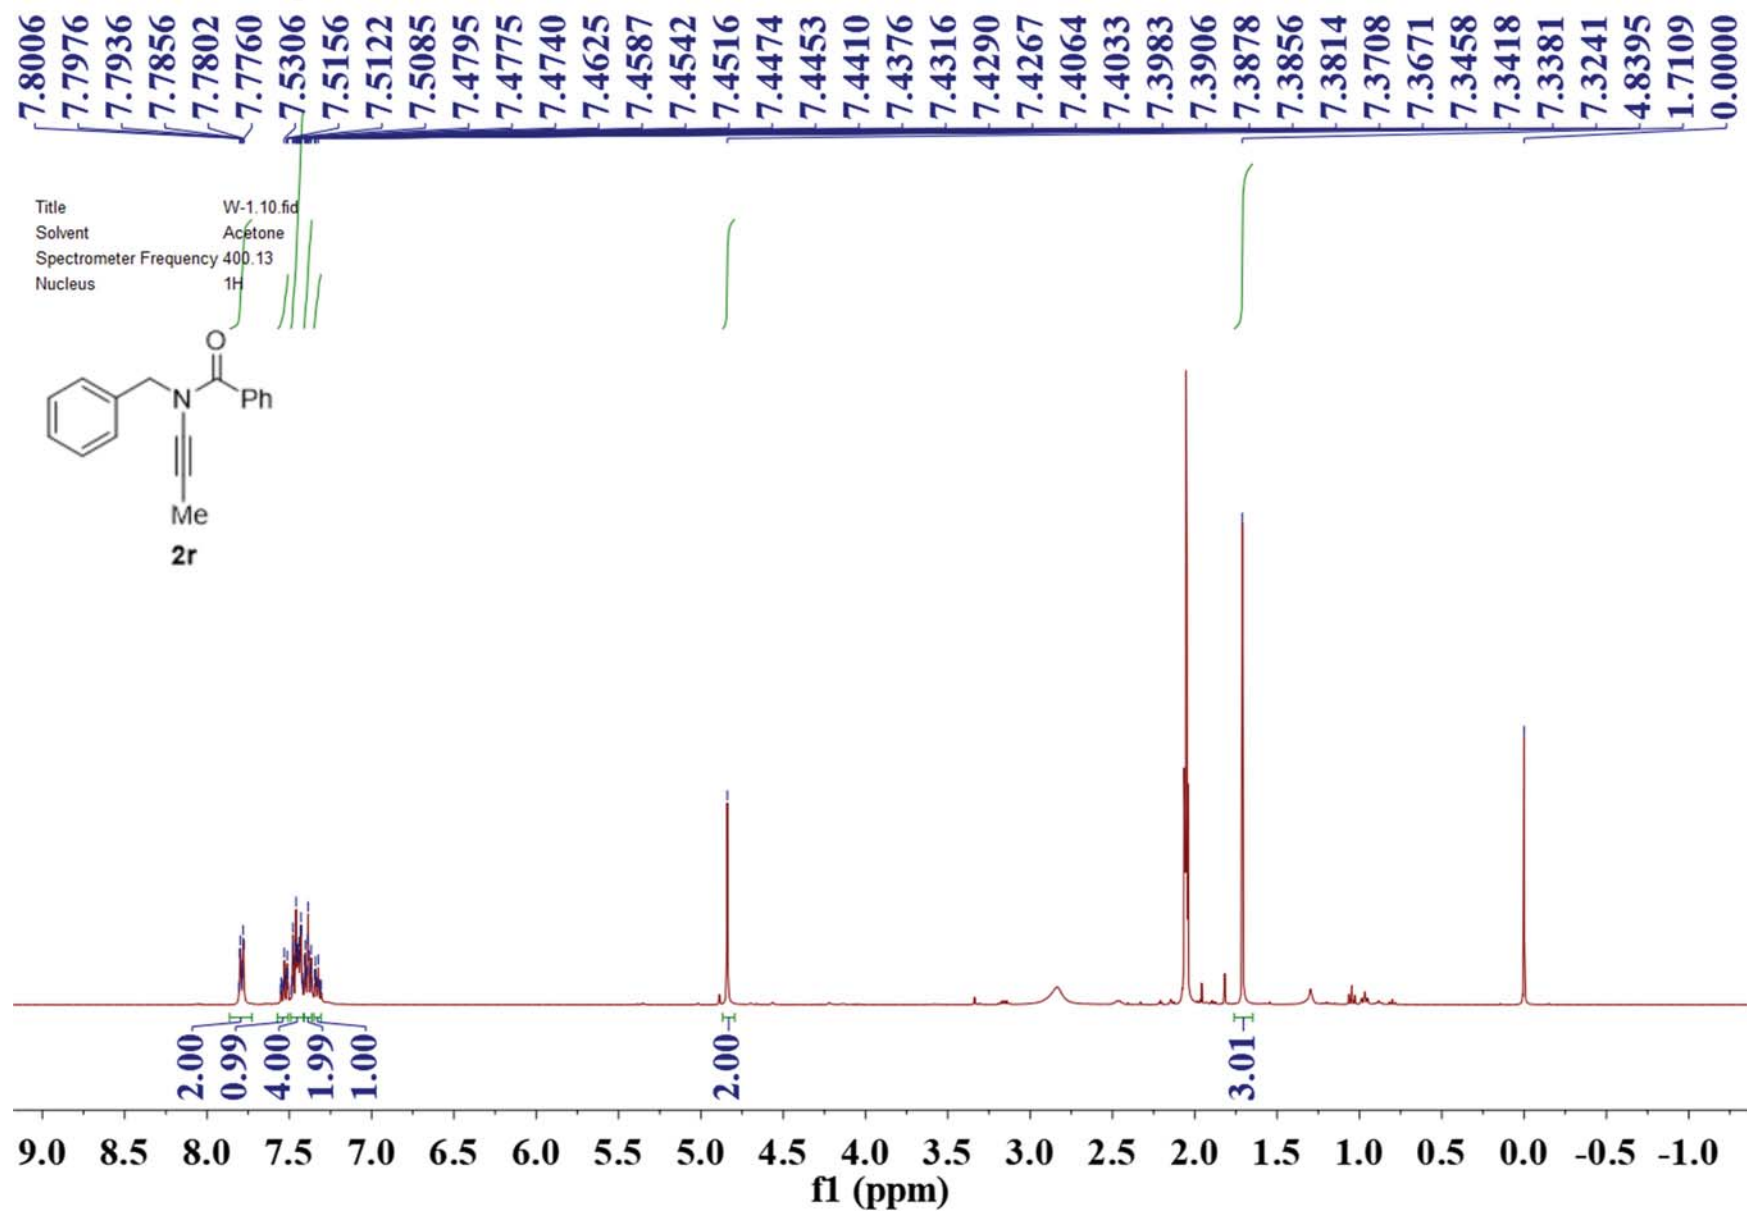

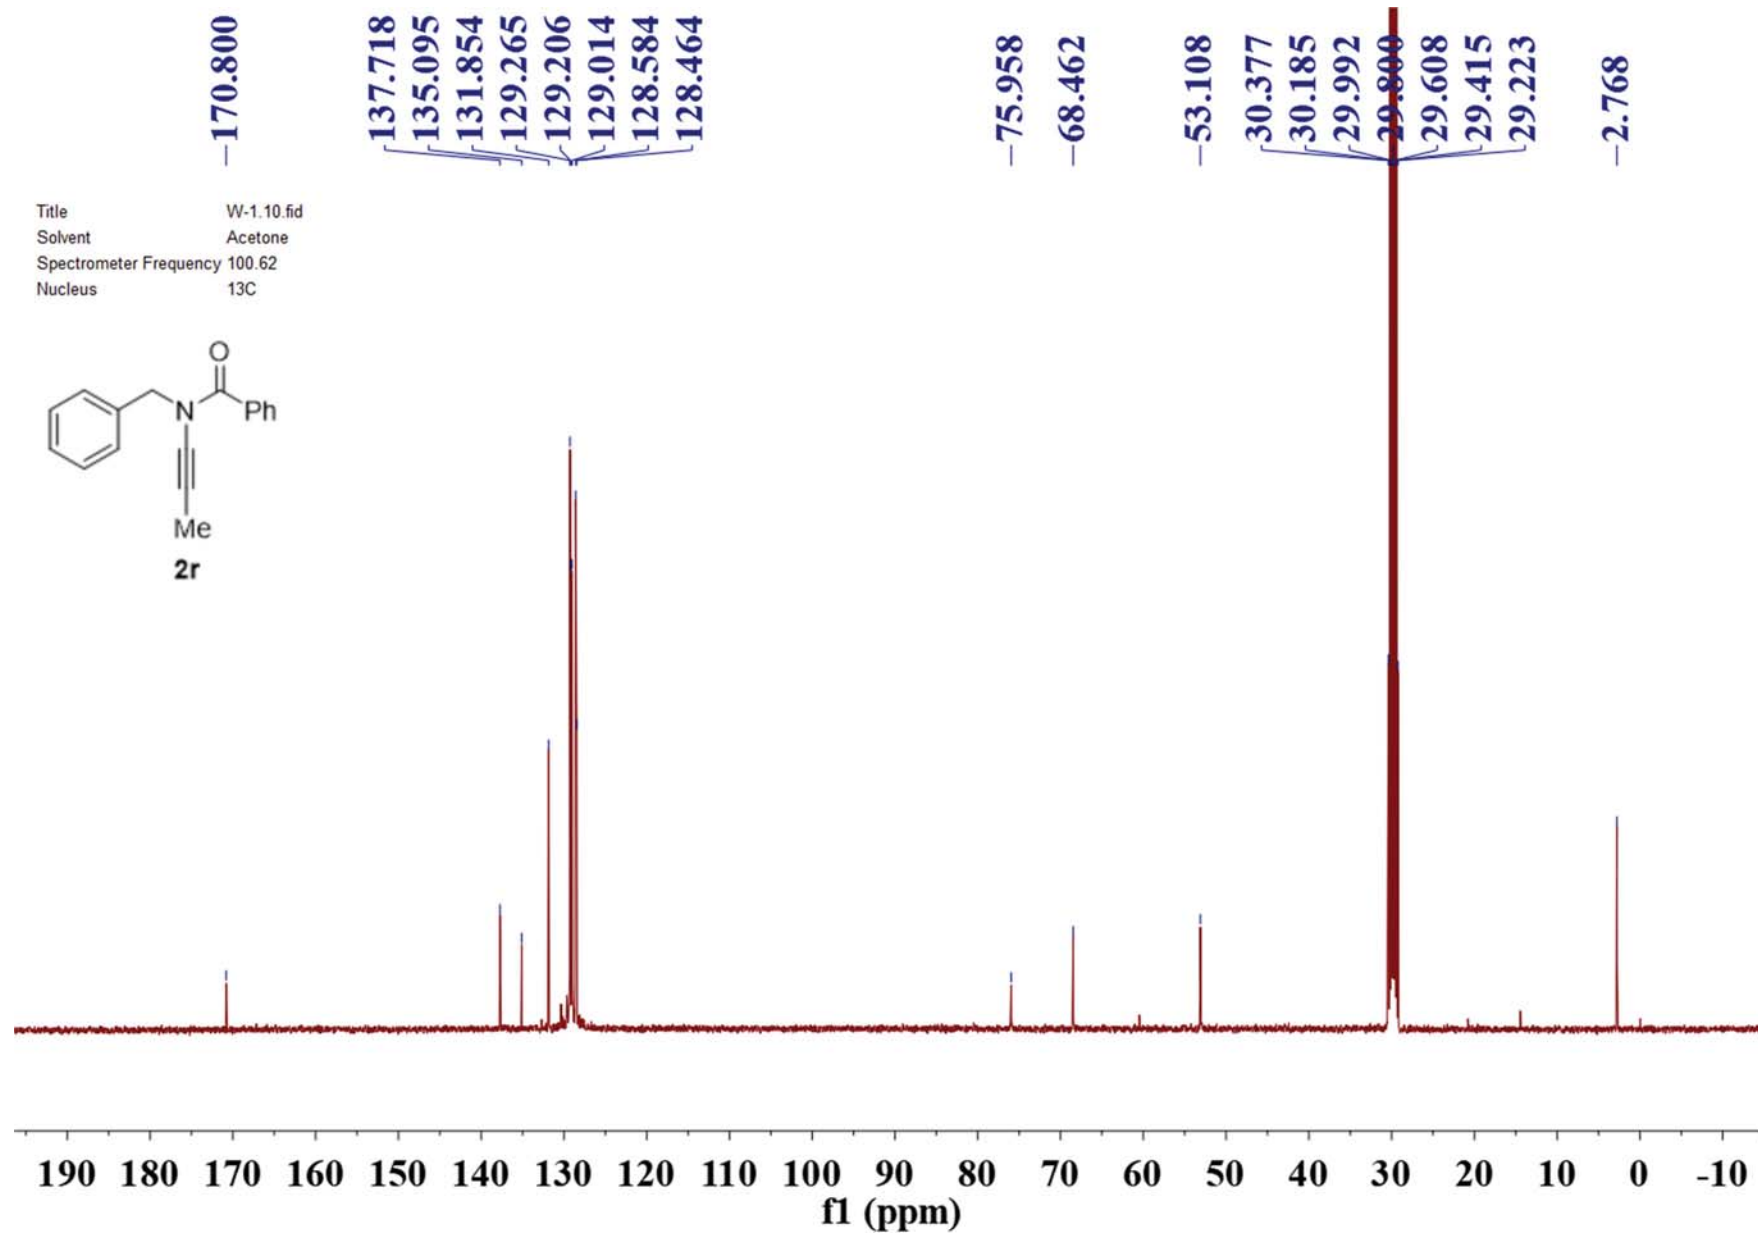

# $^1\text{H}$ NMR and $^{13}\text{C}$ NMR Spectra of *N*-Arylimines 3.

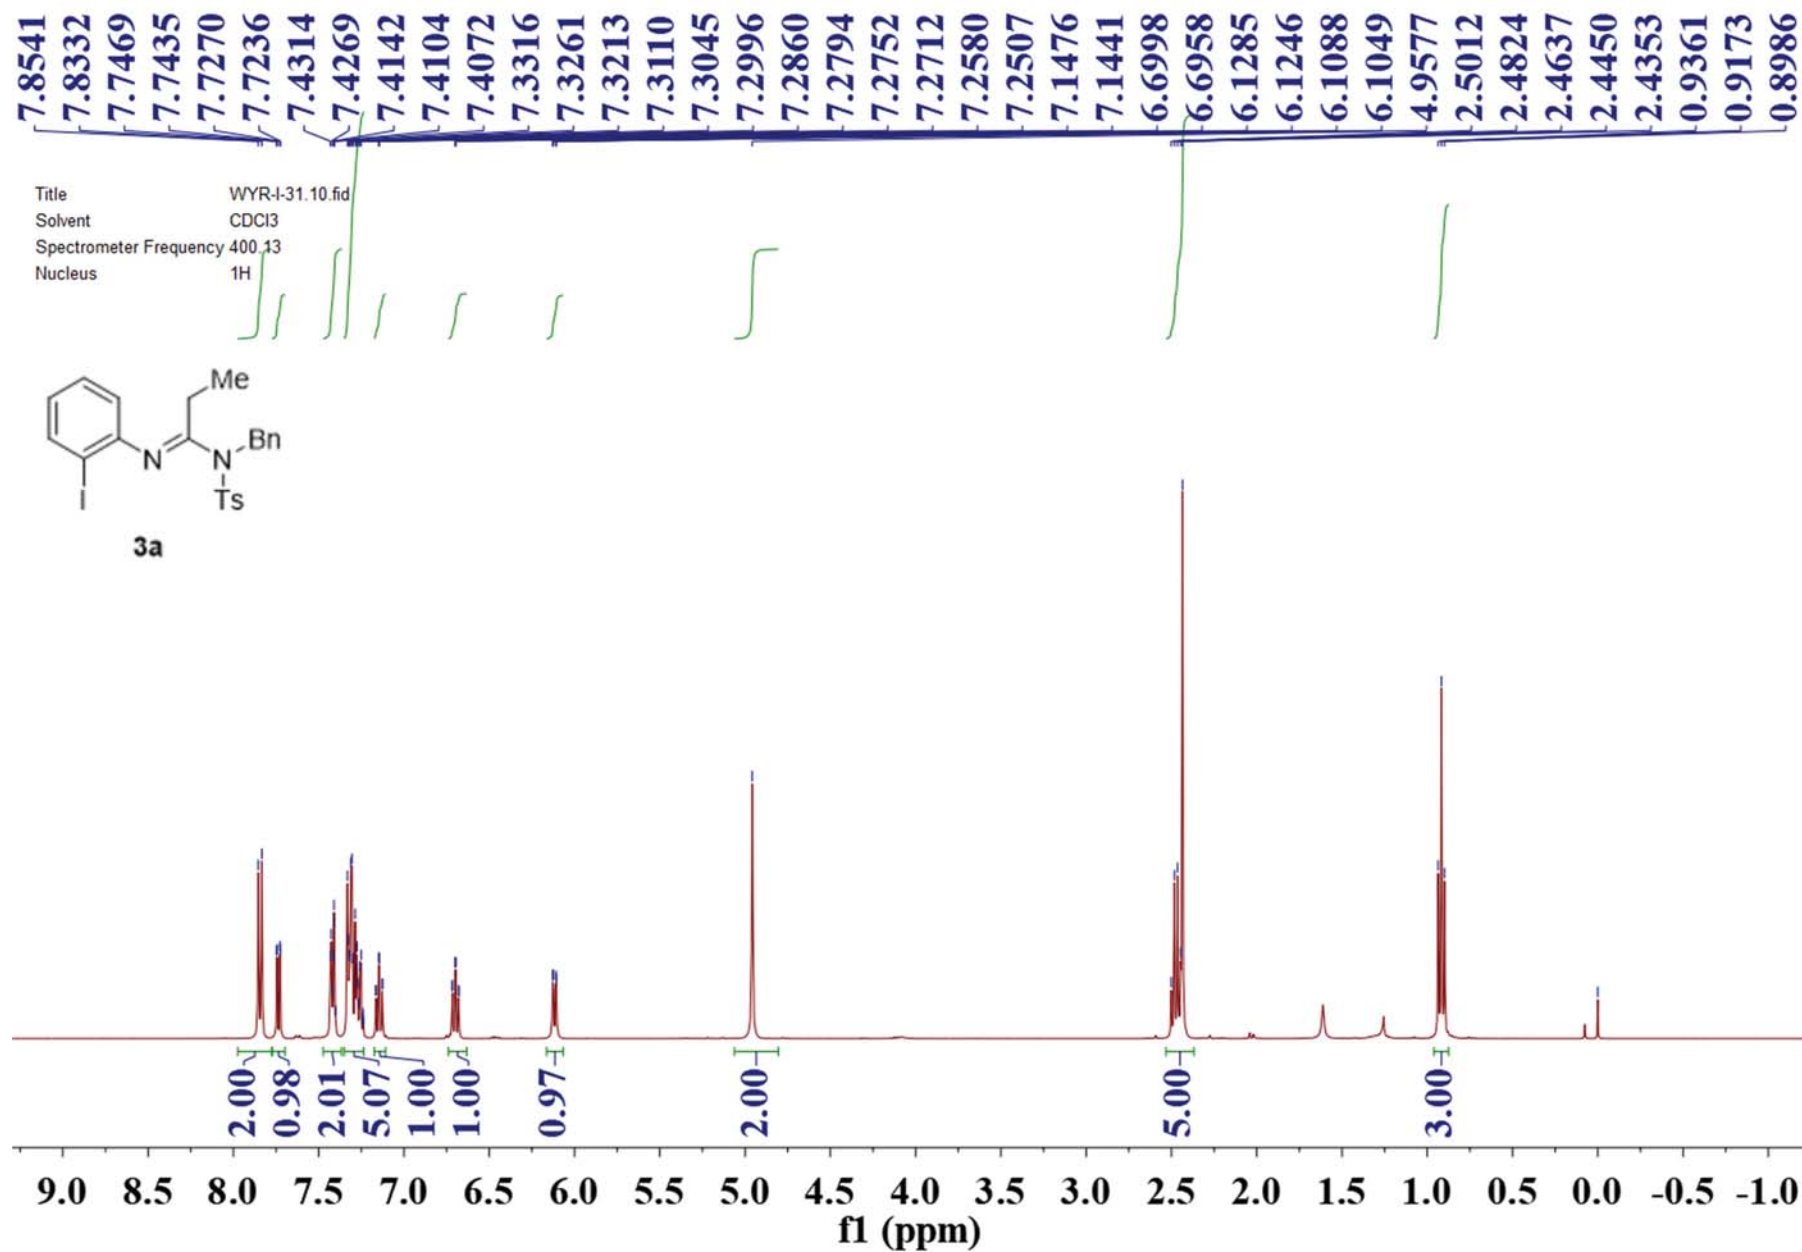

160.951  
150.103  
144.332  
139.105  
137.103  
136.772  
129.981  
129.022  
128.949  
128.355  
127.991  
127.582  
124.735  
119.694  
90.021  
77.517  
77.200  
76.882  
-51.279  
26.109  
21.785  
11.593

Title WYR-I-31碳谱/ 10  
Solvent CDCl3  
Spectrometer Frequency 100.62  
Nucleus 13C

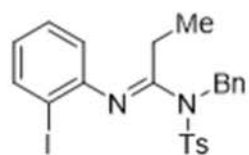

3a

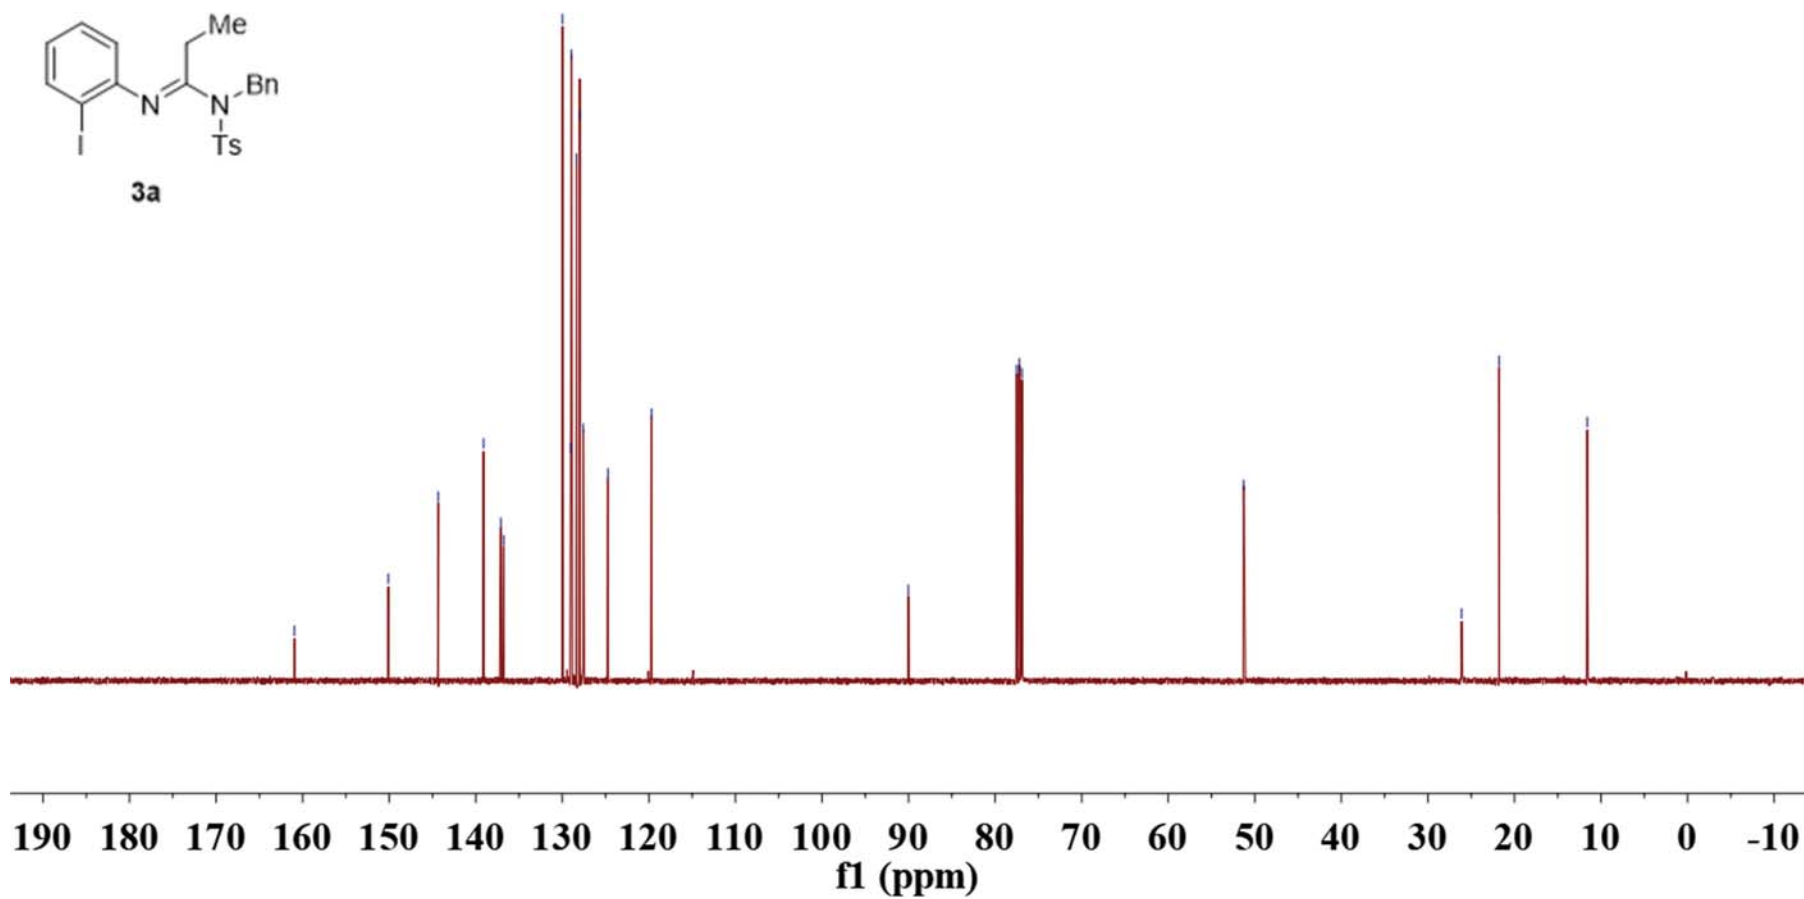

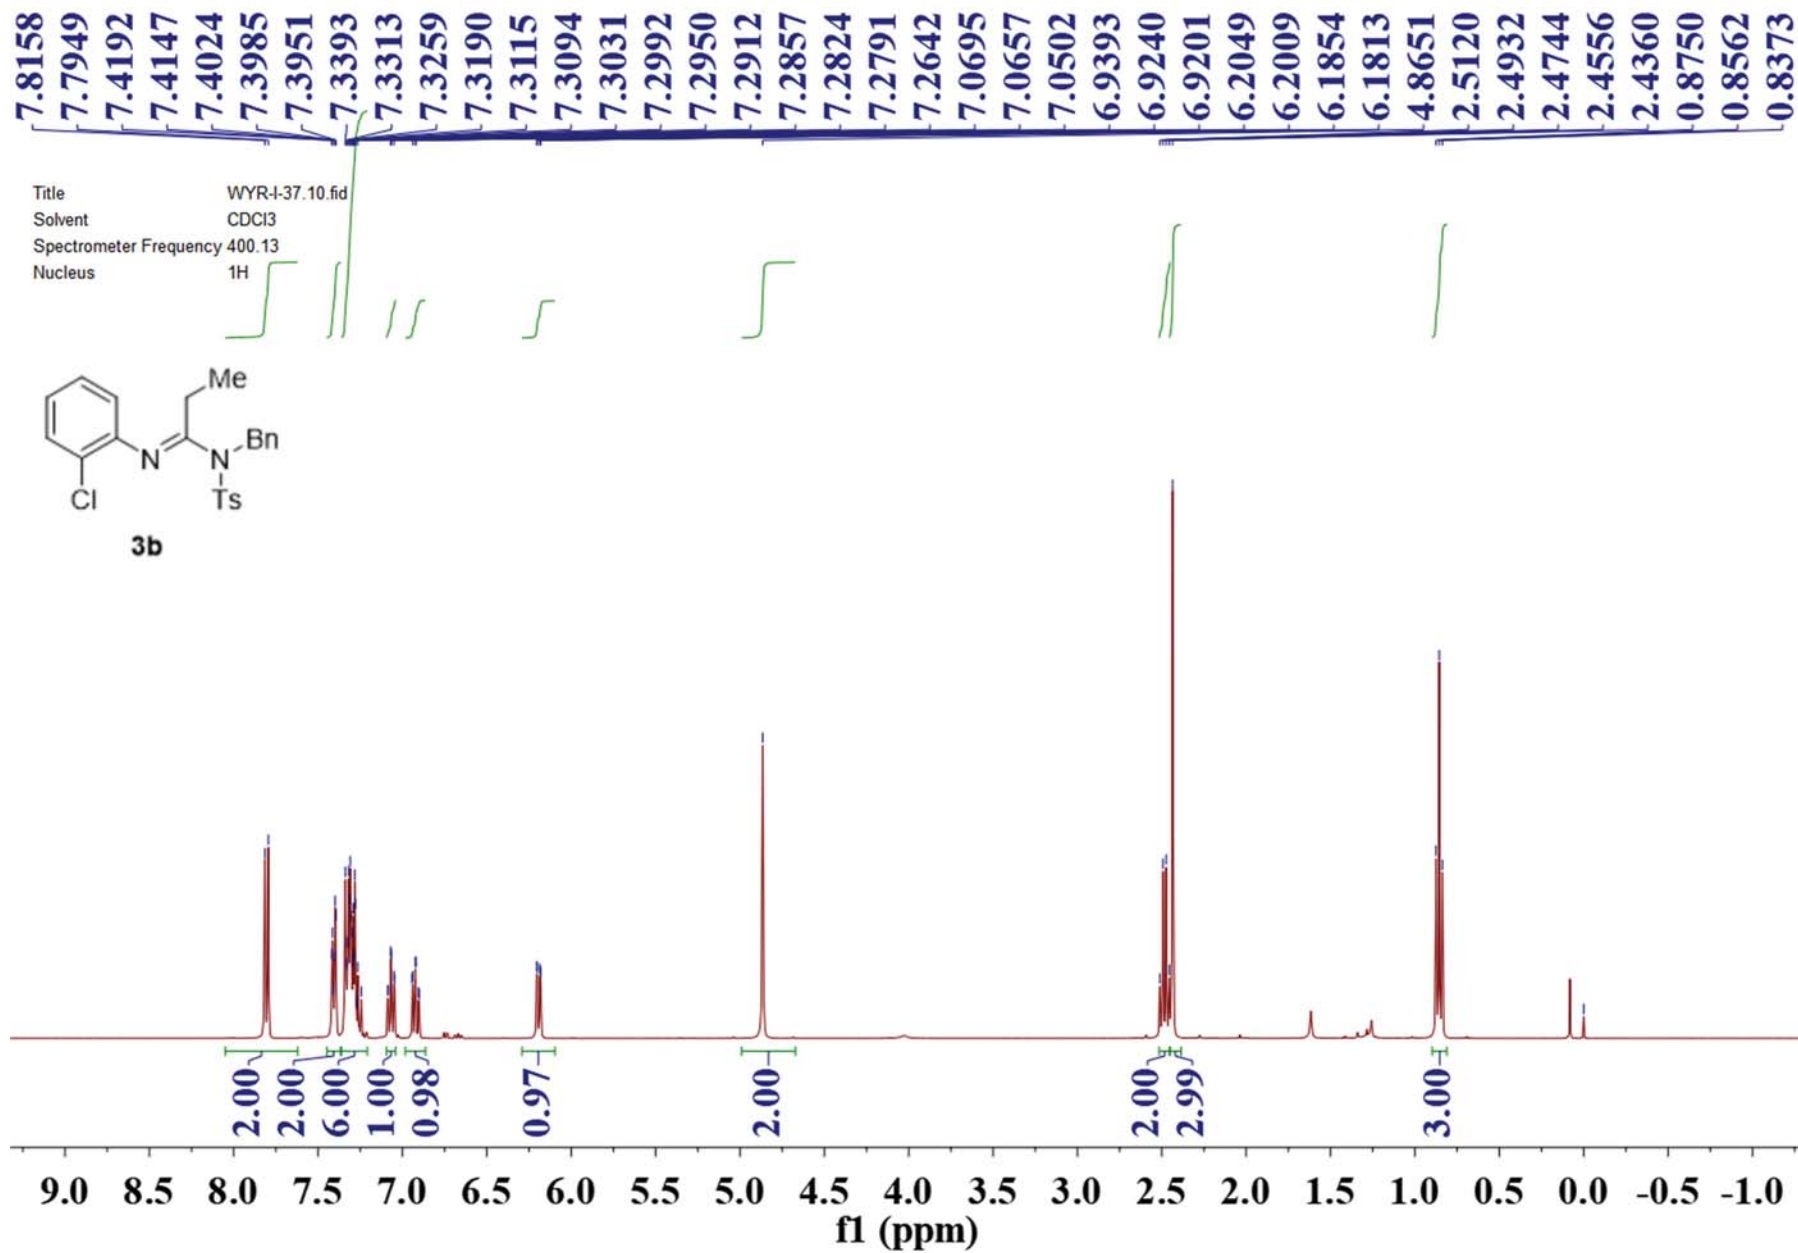



161.673  
145.597  
144.353  
136.841  
136.167  
129.908  
129.844  
129.124  
128.297  
127.790  
127.637  
127.418  
124.327  
123.922  
120.912  
77.518  
77.200  
76.882  
-51.326  
26.473  
21.762  
11.316

Title WYR-I-37/ 10  
Solvent CDCl3  
Spectrometer Frequency 100.62  
Nucleus 13C

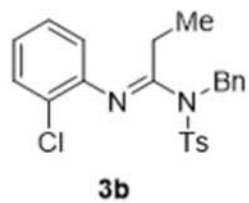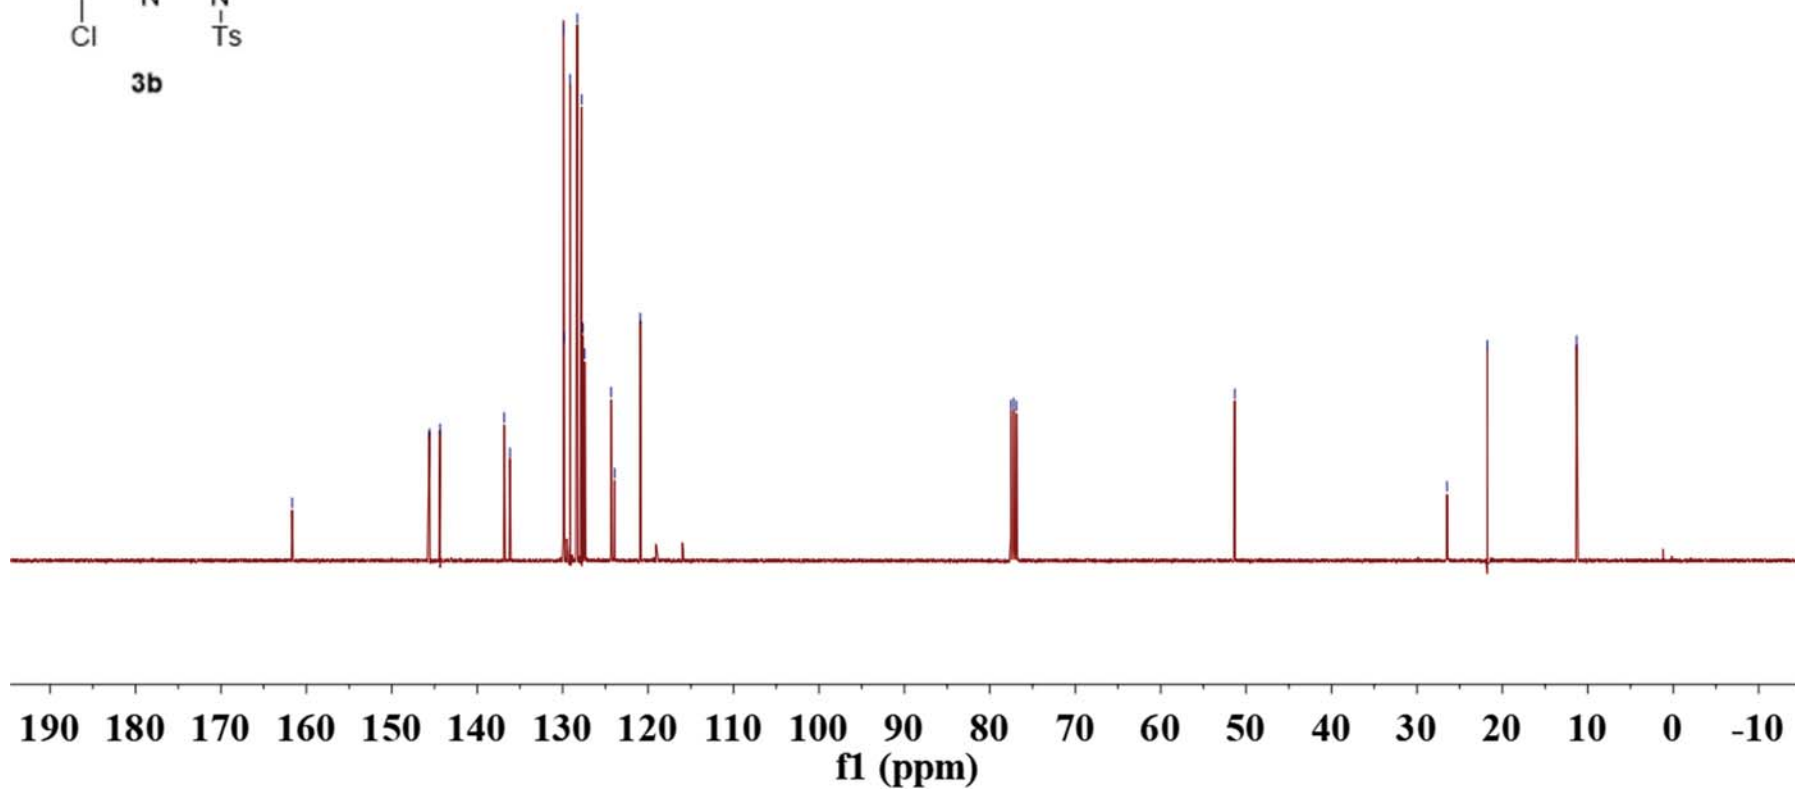

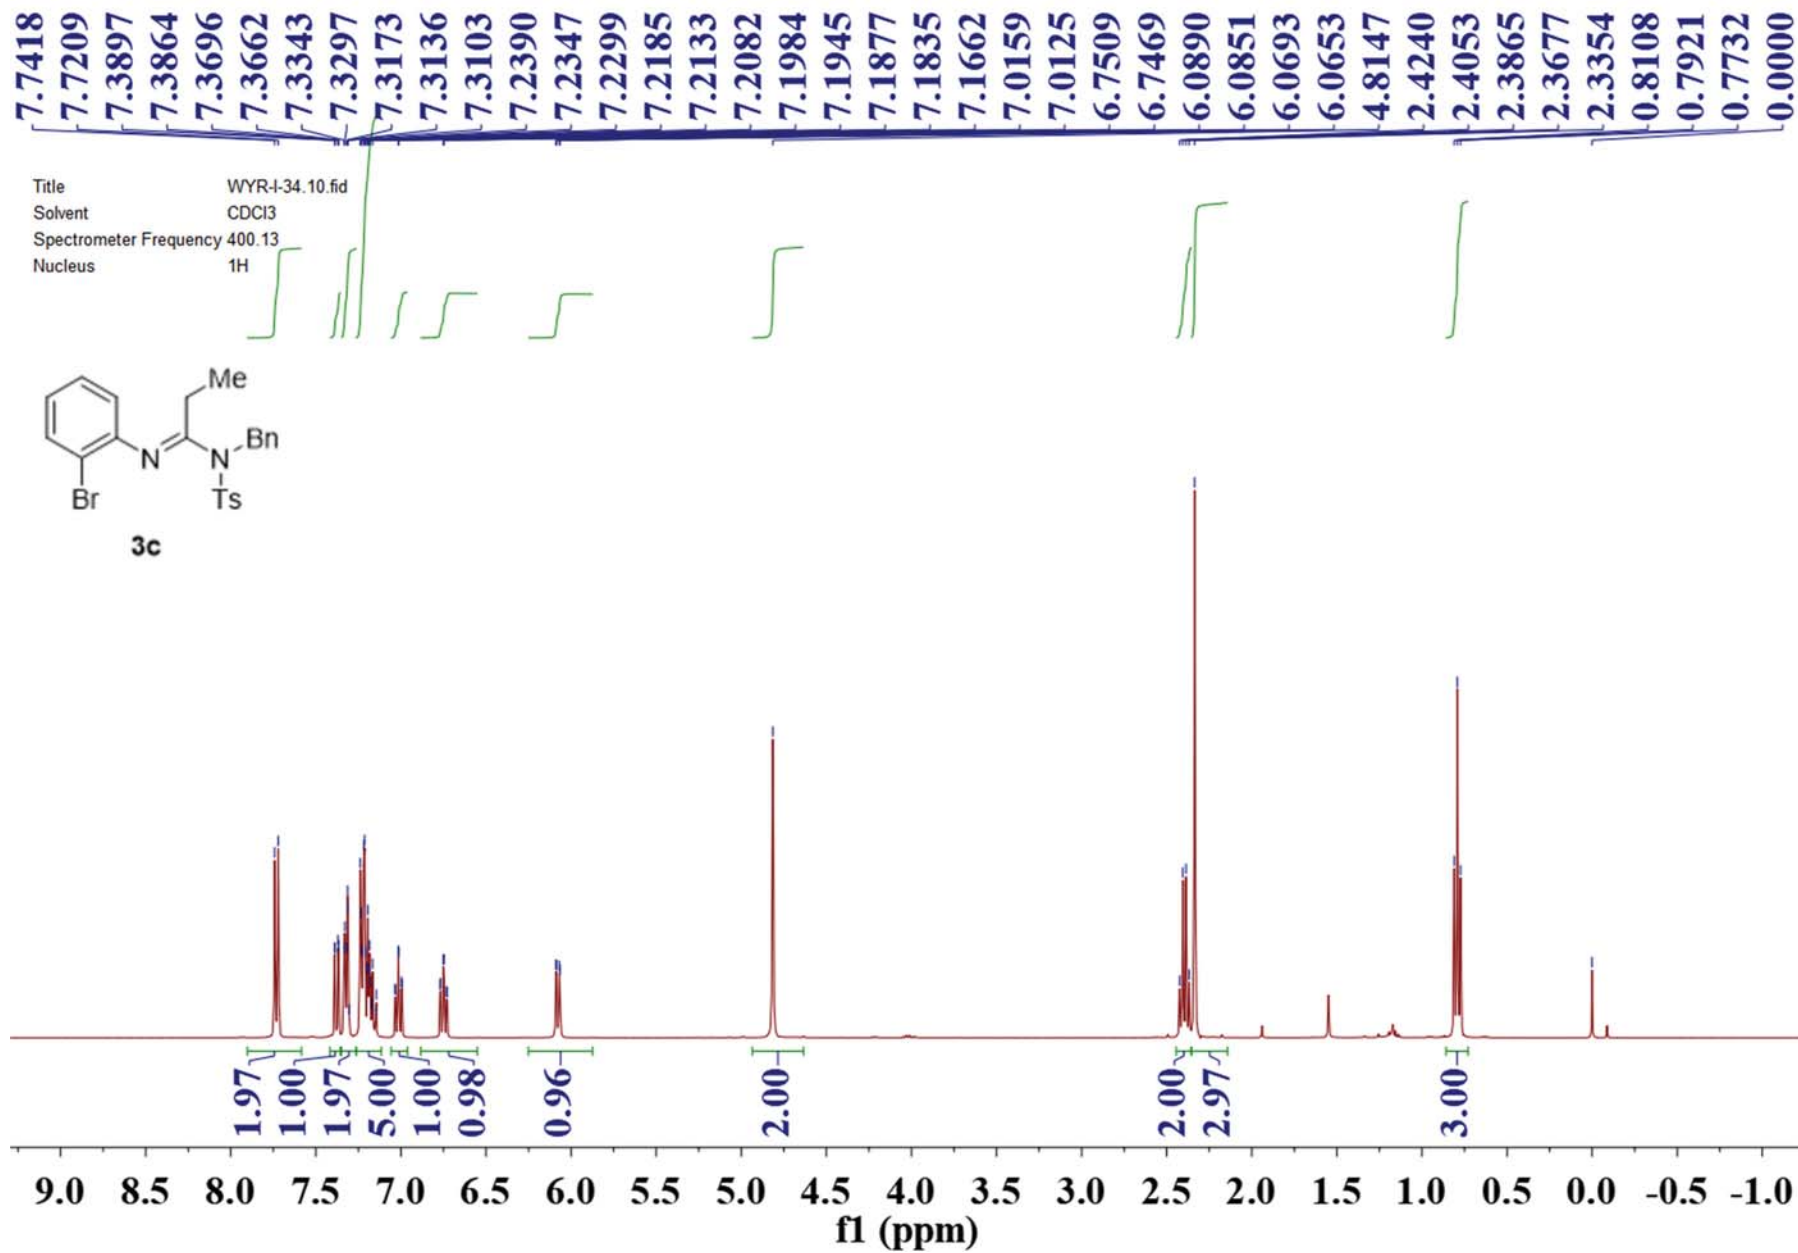

161.335  
 146.998  
 144.312  
 136.921  
 136.392  
 132.895  
 129.895  
 128.996  
 128.282  
 128.063  
 127.806  
 127.581  
 124.508  
 120.739  
 114.078  
 77.518  
 77.200  
 76.882  
 -51.263  
 26.317  
 21.727  
 11.392

Title WYR-I-34.10.fid  
 Solvent CDCl3  
 Spectrometer Frequency 100.62  
 Nucleus 13C

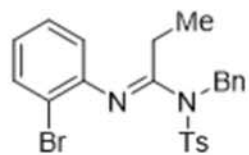

3c

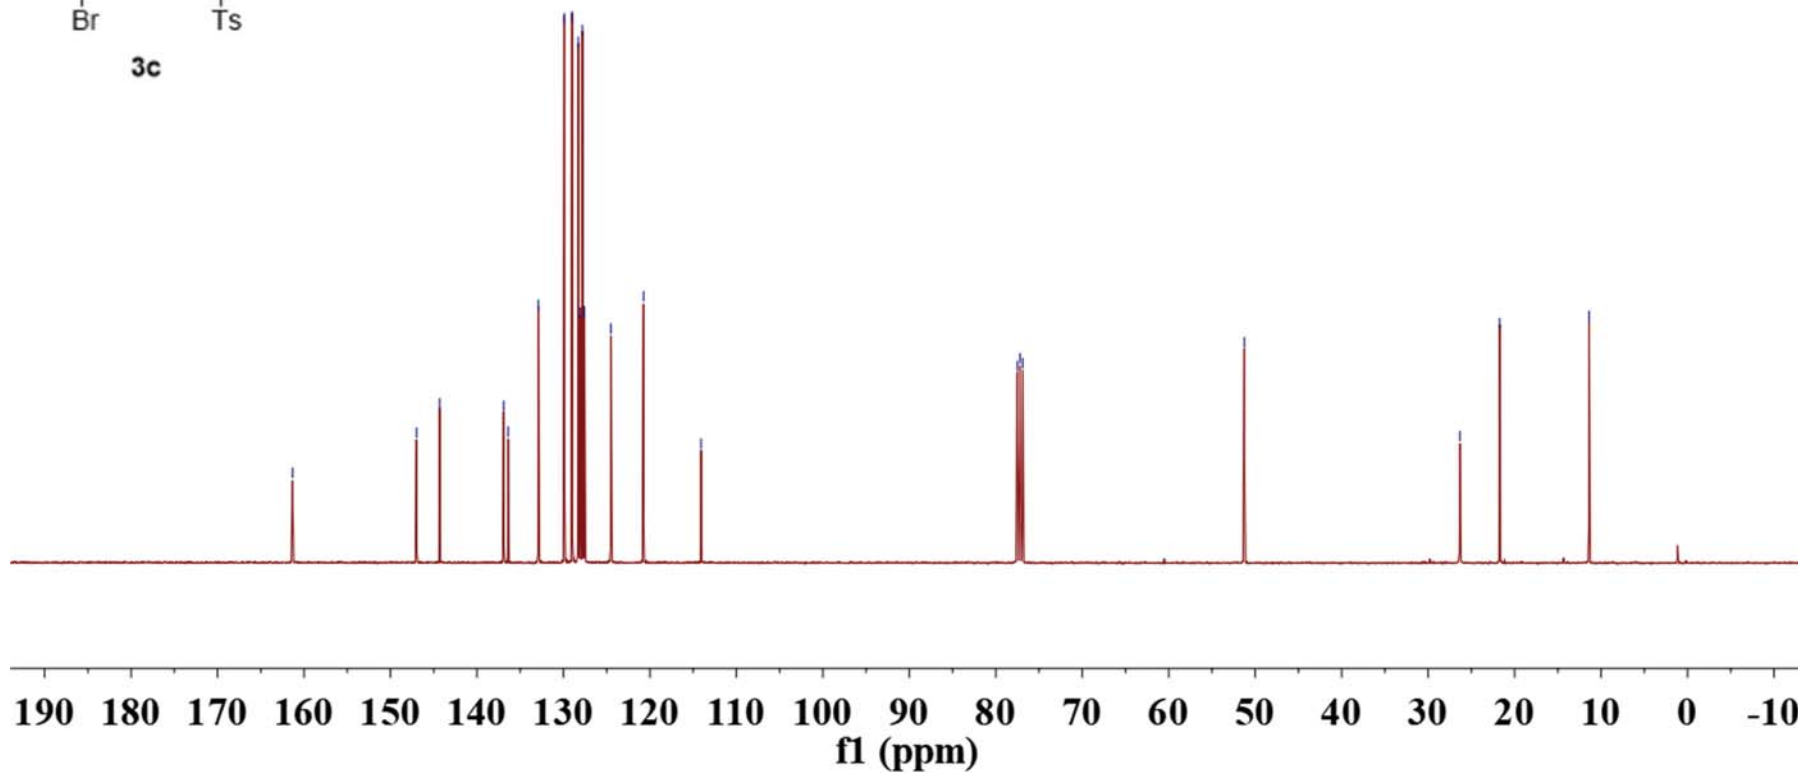

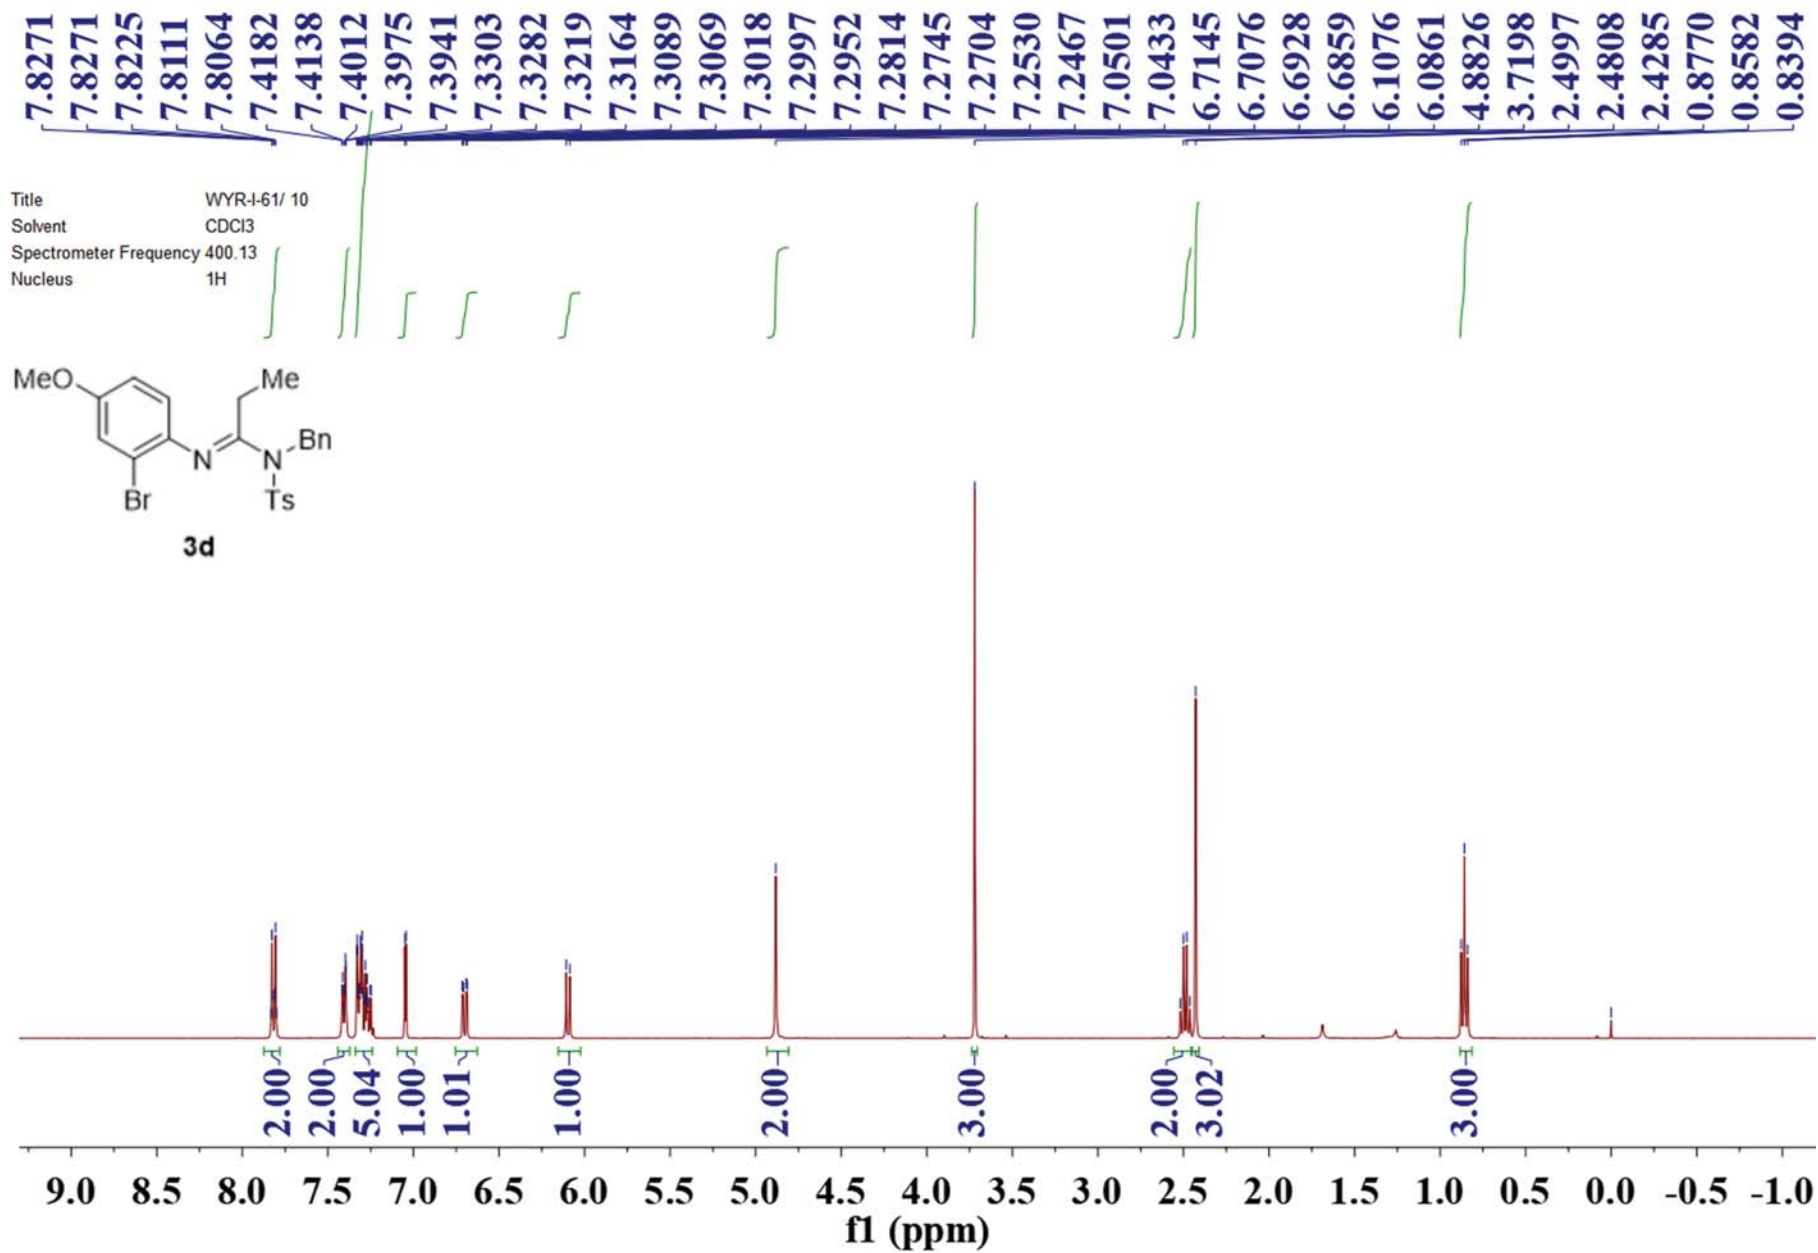

162.229  
 156.146  
 144.261  
 140.364  
 136.983  
 136.383  
 129.883  
 129.067  
 128.273  
 127.840  
 127.579  
 121.134  
 117.814  
 114.365  
 114.264  
 77.518  
 77.200  
 76.882  
 55.787  
 51.274  
 26.220  
 21.740  
 11.332

Title WYR-I-61.10.fid  
 Solvent CDCl3  
 Spectrometer Frequency 100.62  
 Nucleus 13C

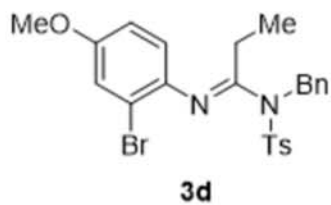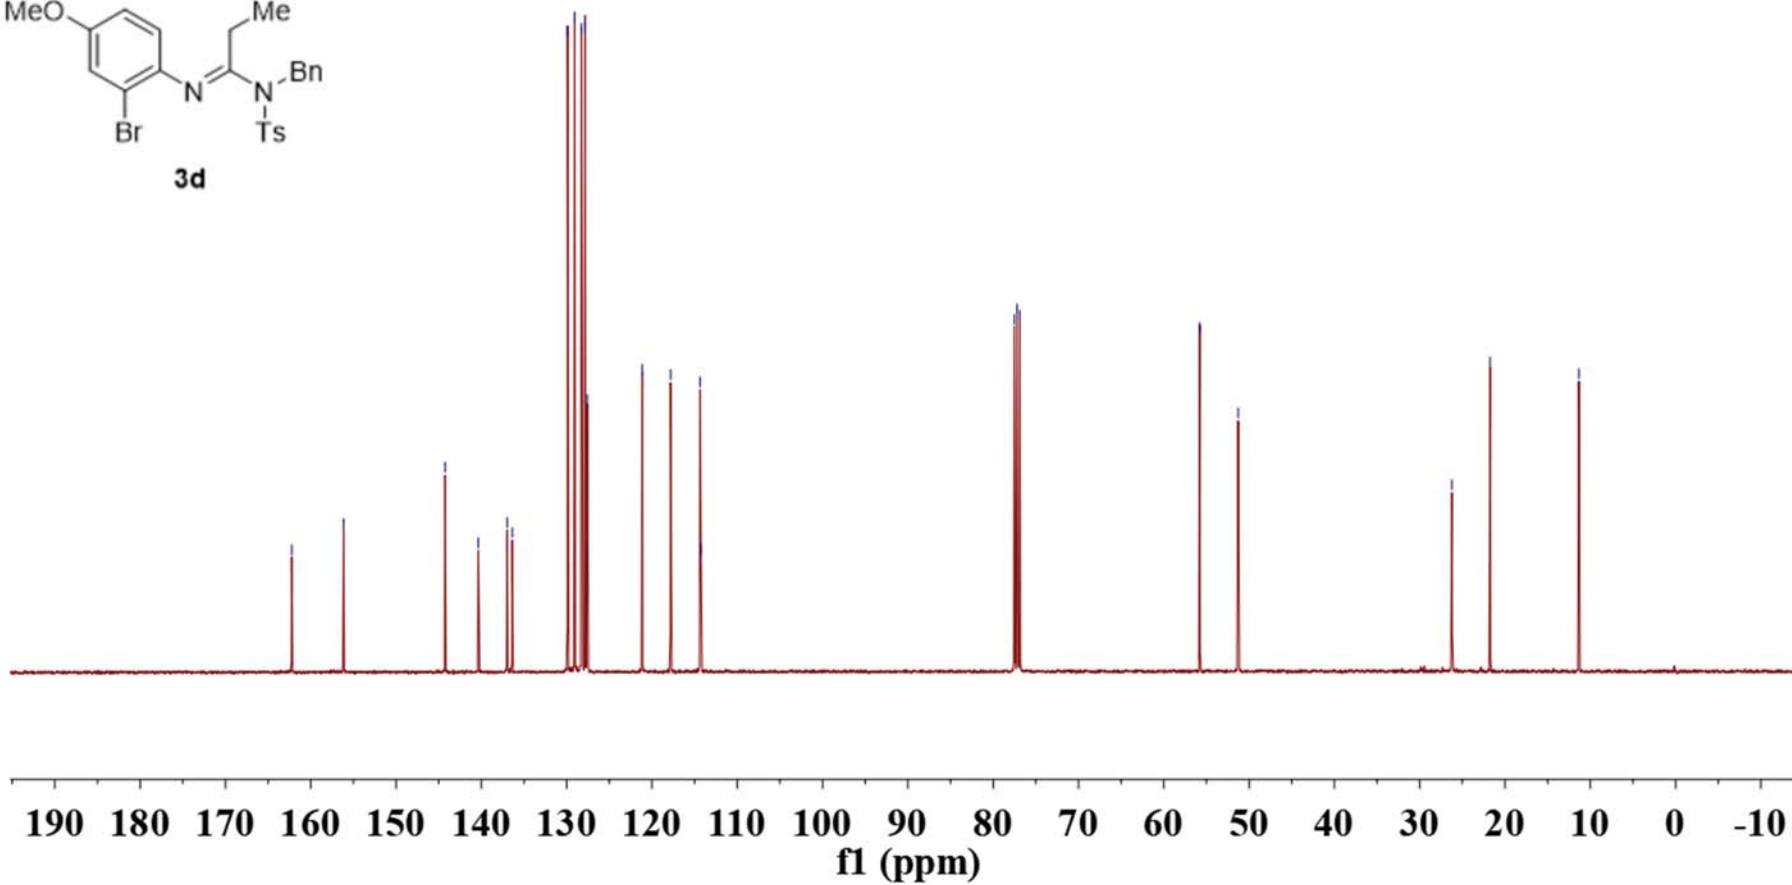

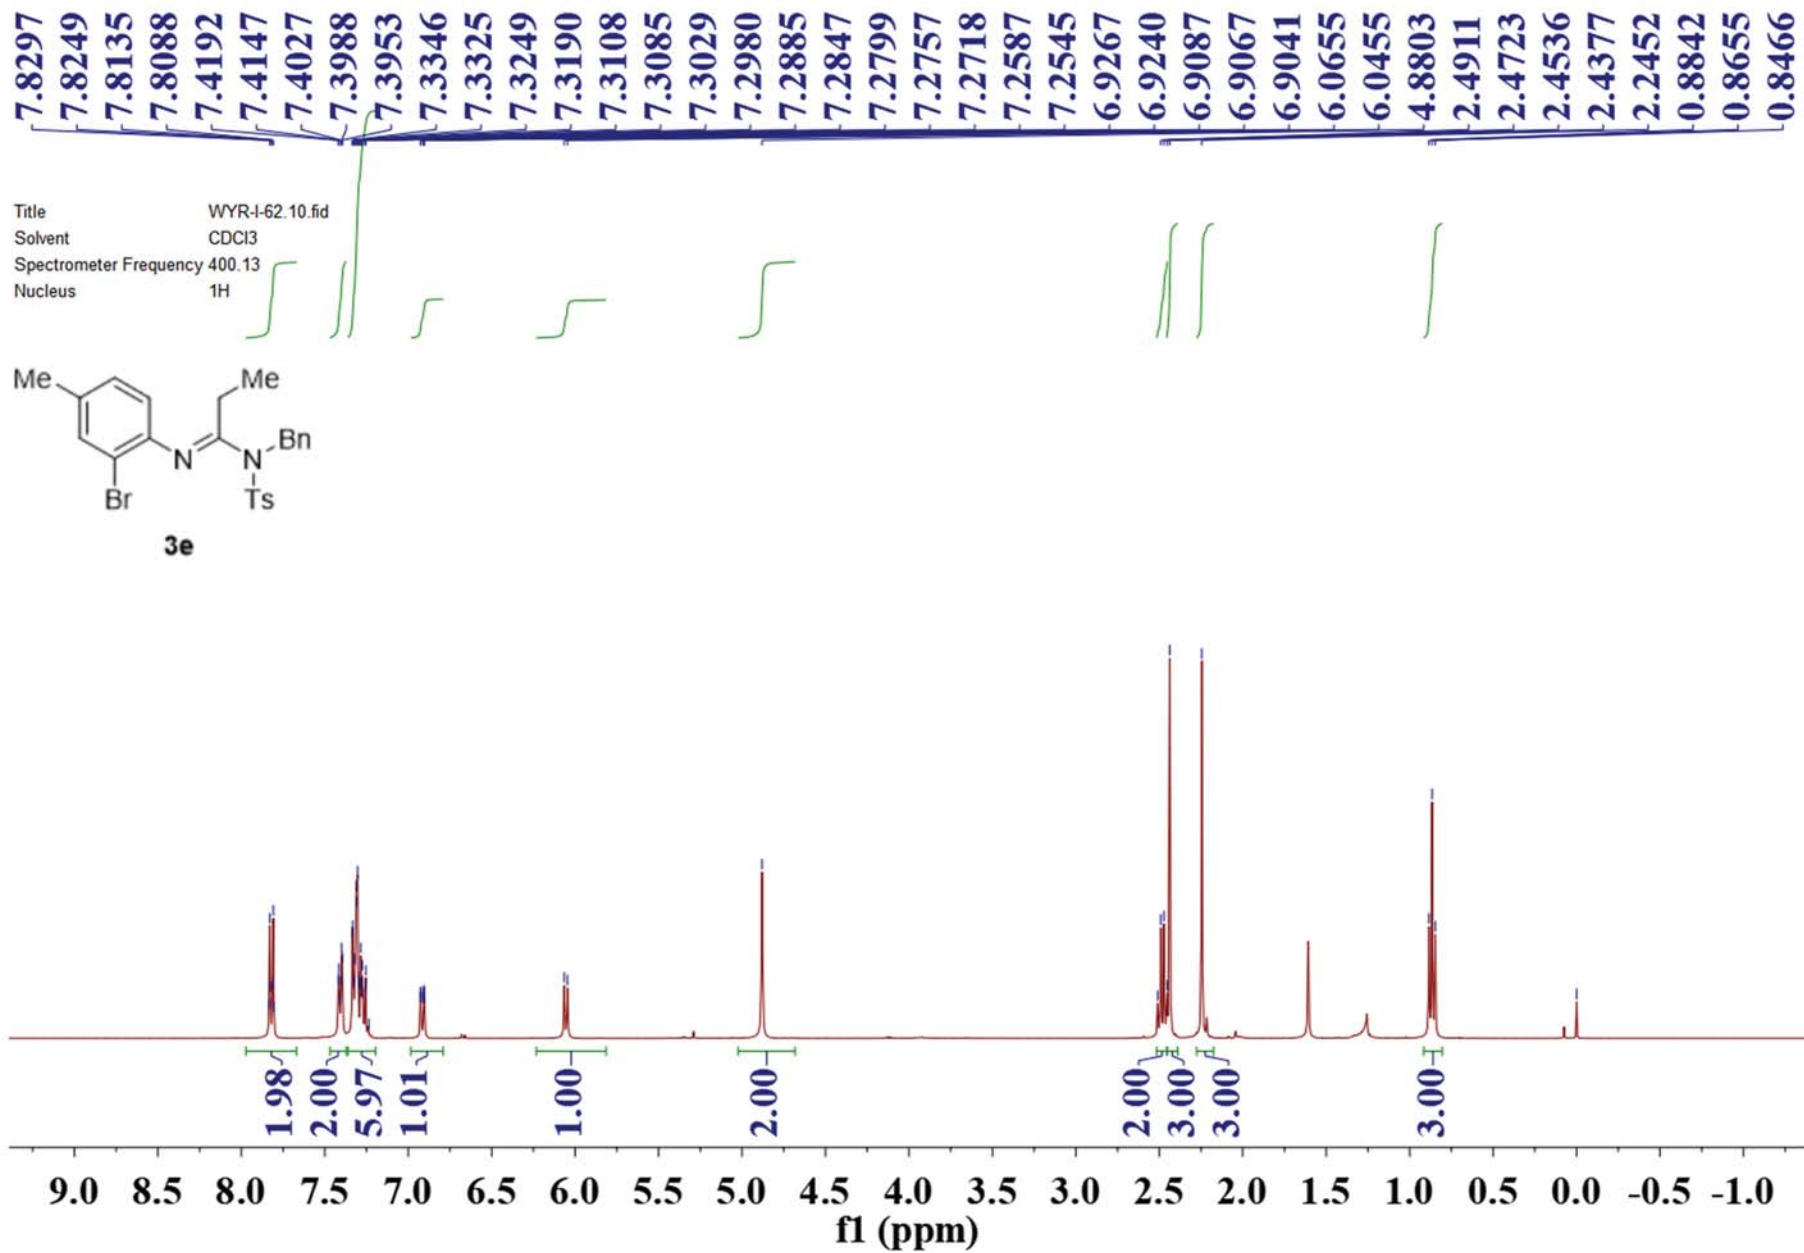

161.663  
 144.460  
 144.301  
 136.996  
 136.426  
 134.399  
 133.225  
 129.922  
 129.128  
 128.847  
 128.305  
 127.888  
 127.607  
 120.472  
 113.819  
 77.518  
 77.200  
 76.882  
 -51.309  
 -26.307  
 -21.785  
 -20.542  
 -11.415

Title WYR-I-62.10.fid  
 Solvent CDCl3  
 Spectrometer Frequency 100.62  
 Nucleus 13C

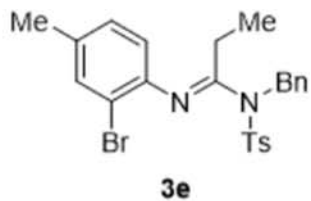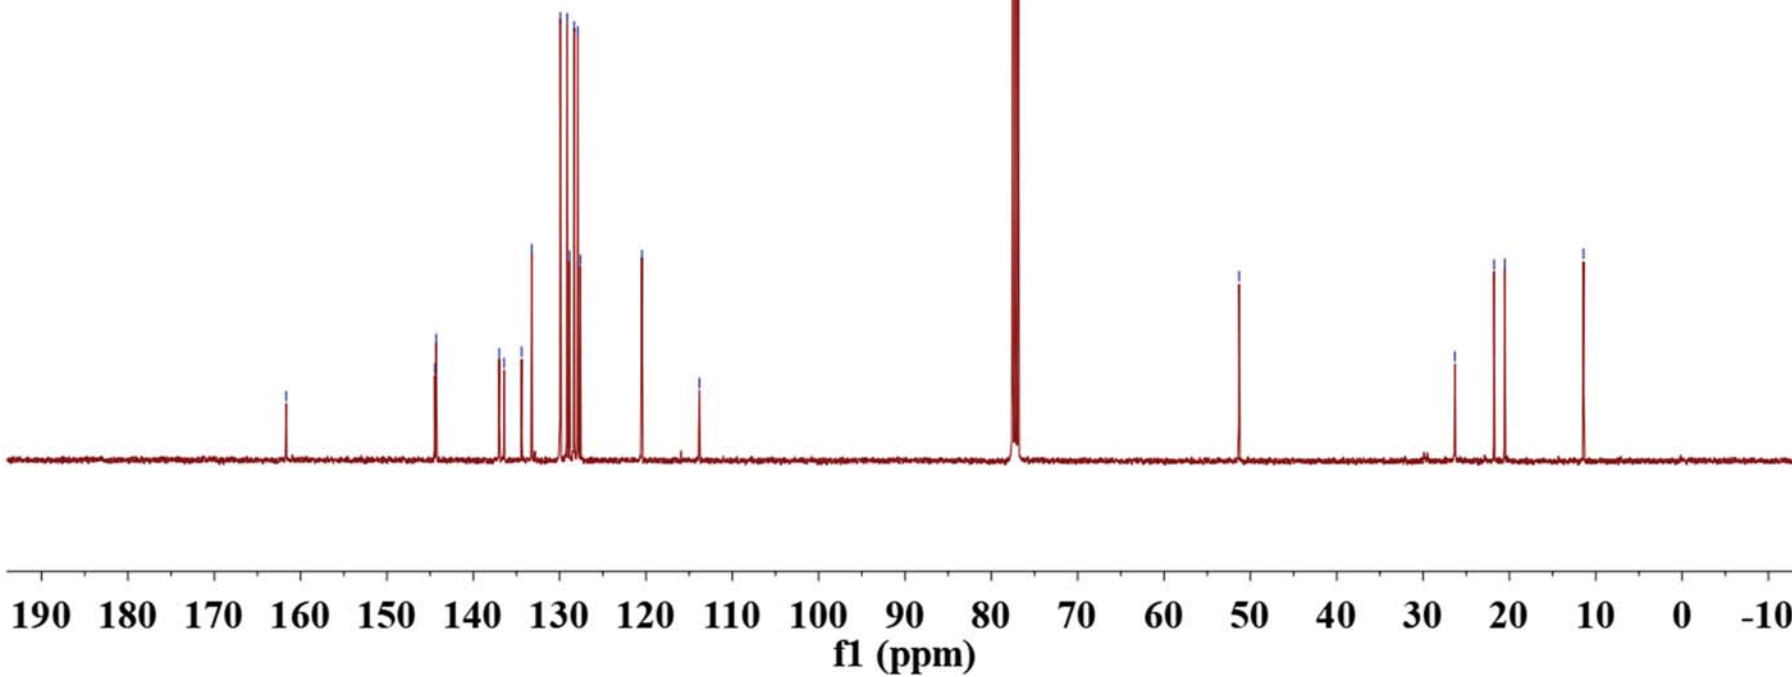

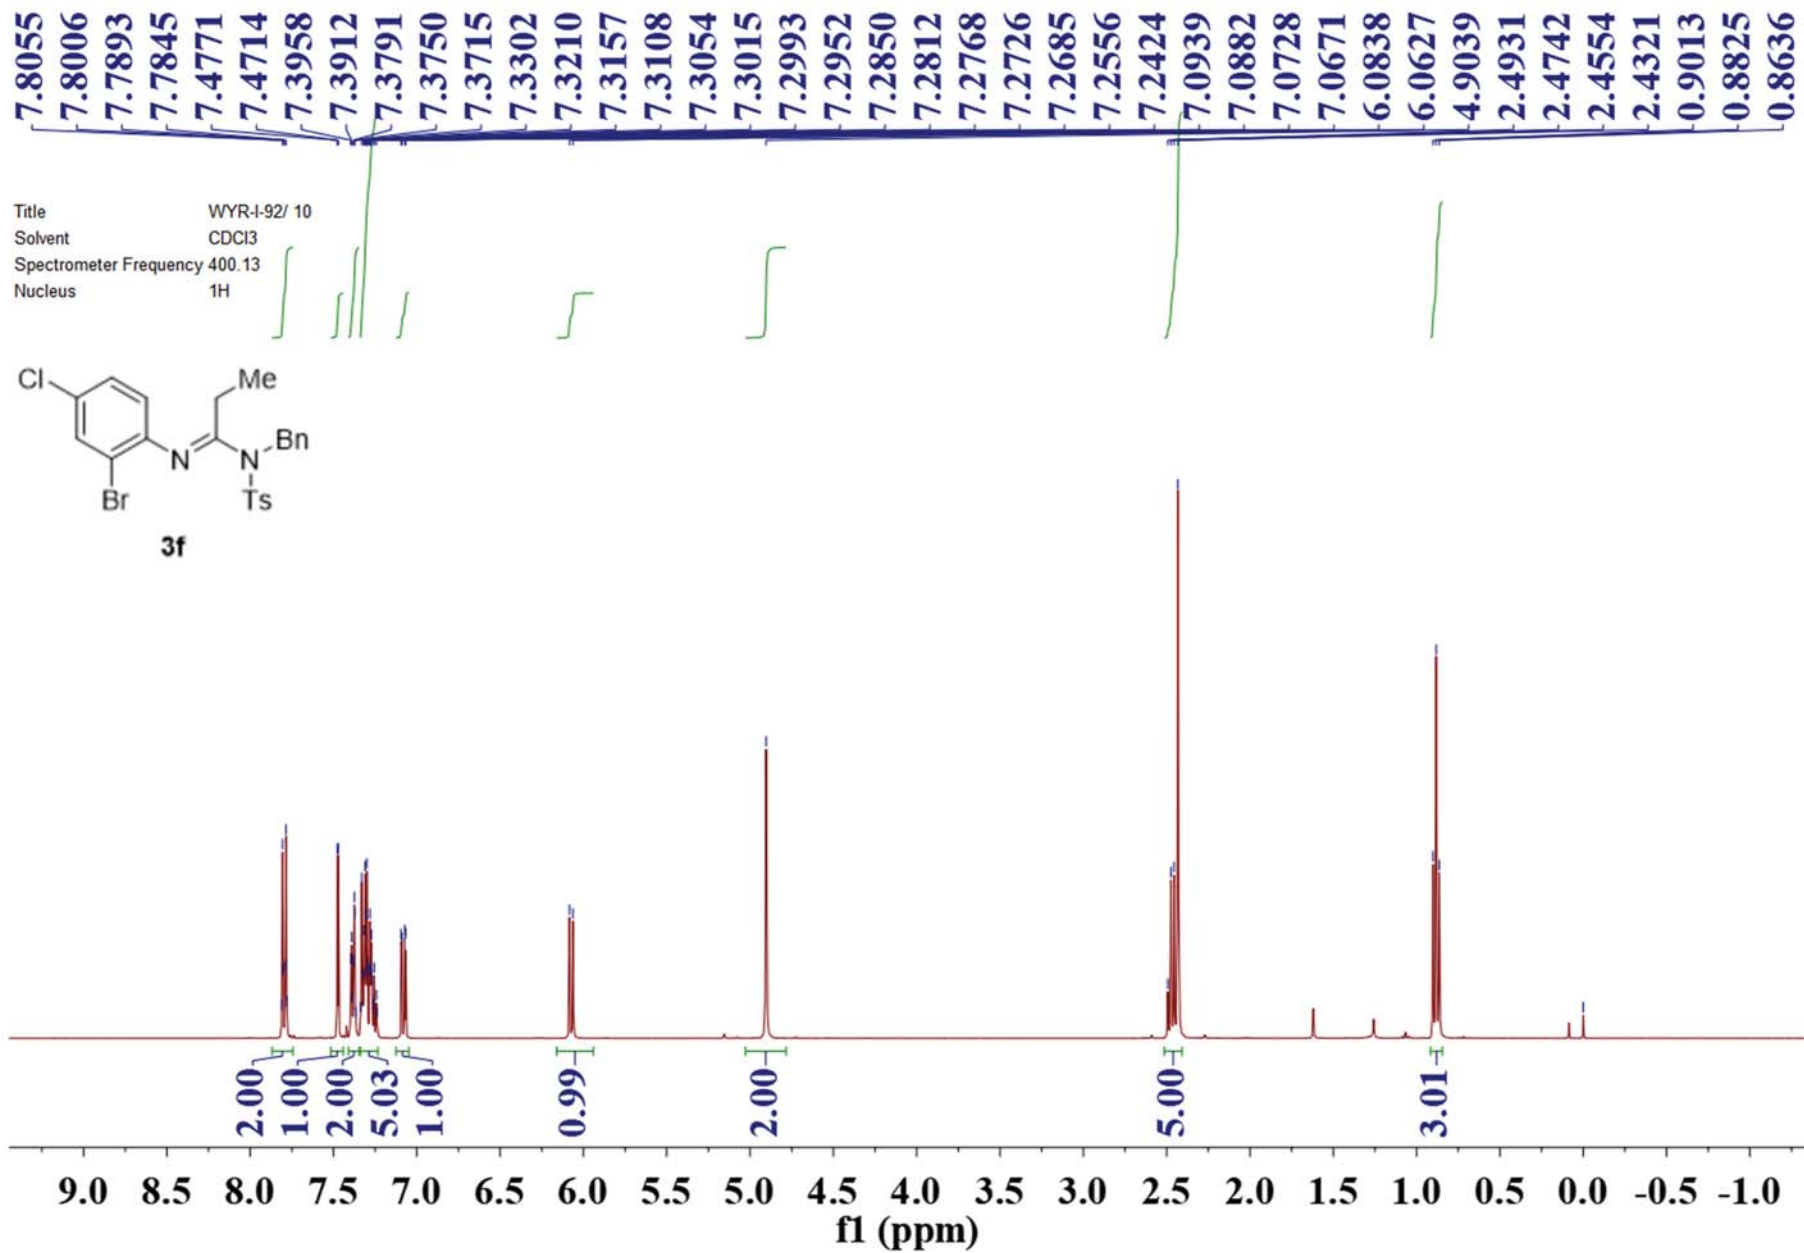



161.731  
 145.745  
 144.438  
 136.843  
 136.379  
 132.363  
 129.920  
 128.865  
 128.779  
 128.329  
 128.246  
 127.778  
 127.634  
 121.437  
 114.510  
 77.518  
 77.200  
 76.882  
 -51.277  
 26.235  
 21.740  
 11.426

Title WYR-I-92.10.fid  
 Solvent CDCl3  
 Spectrometer Frequency 100.62  
 Nucleus 13C

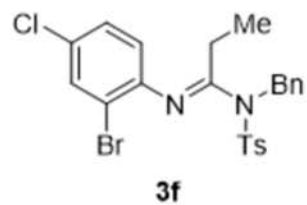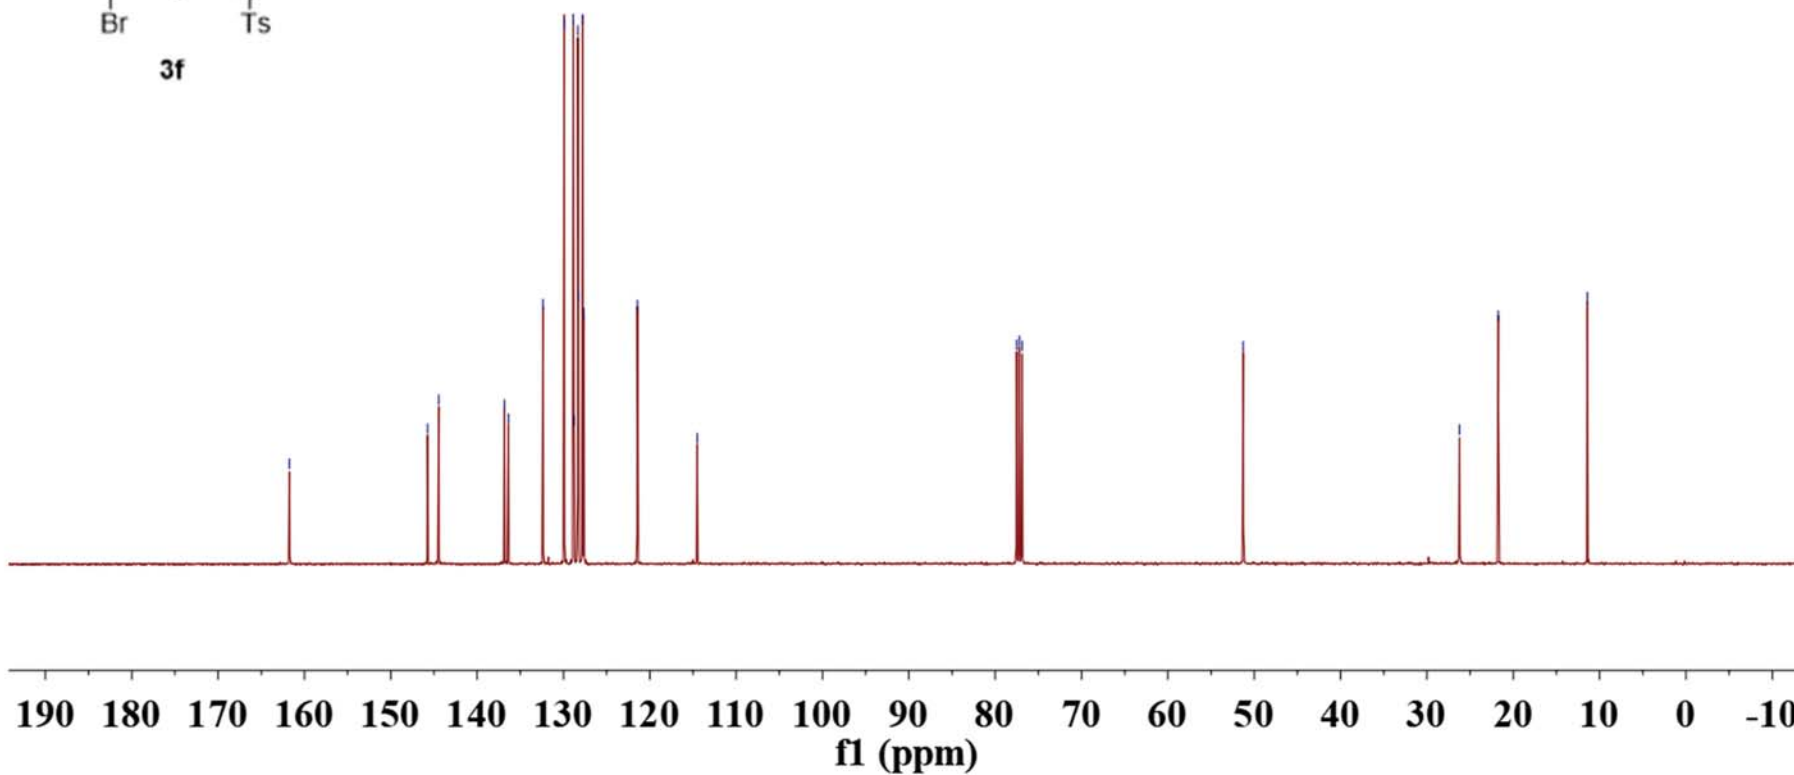

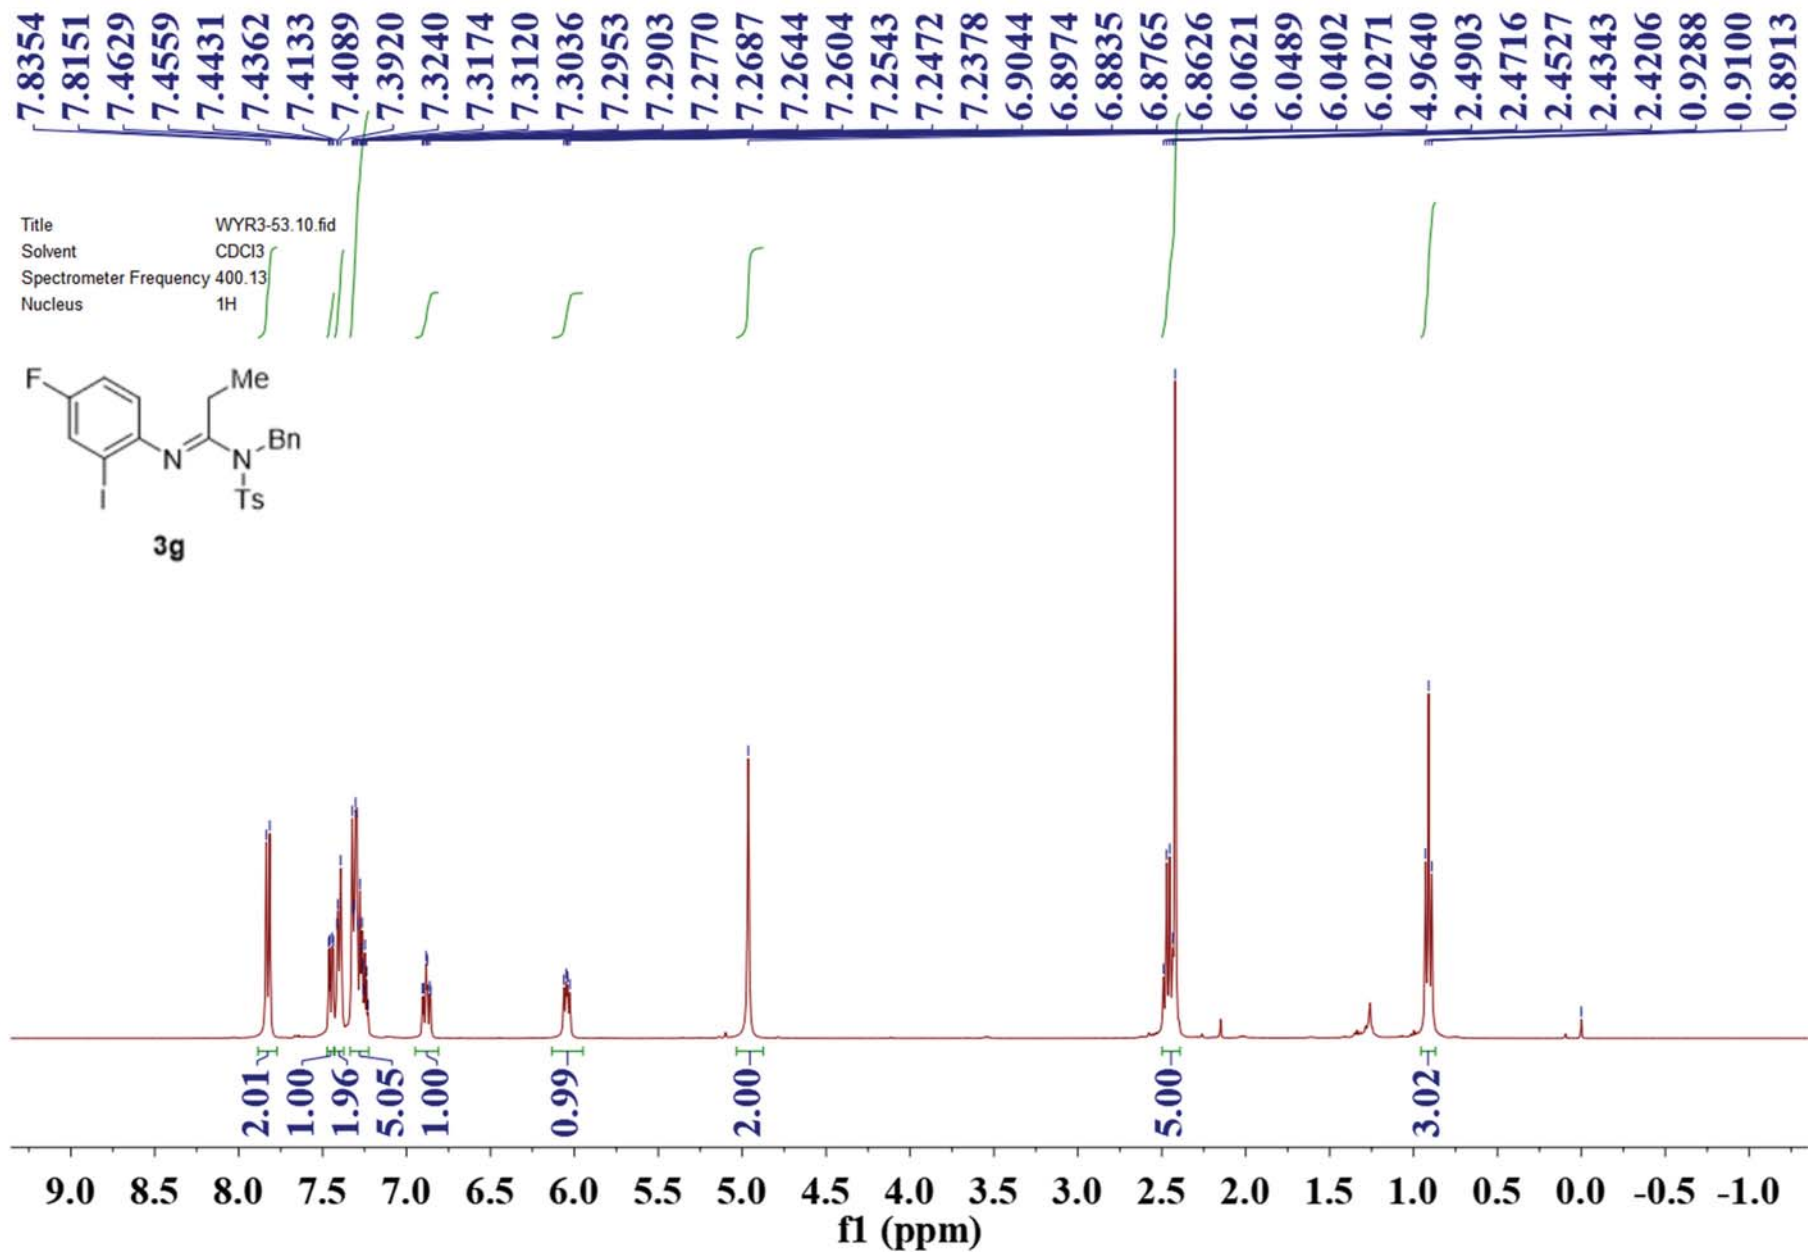

161.607  
 159.490  
 157.042  
 146.488  
 146.459  
 144.346  
 137.007  
 136.654  
 129.926  
 128.762  
 128.316  
 127.875  
 127.550  
 125.651  
 125.408  
 119.821  
 119.743  
 116.062  
 115.843  
 89.199  
 89.115  
 77.518  
 77.200  
 76.882  
 -51.186  
 25.839  
 21.710  
 11.501

Title WYR3-53.10.fid  
 Solvent CDCl3  
 Spectrometer Frequency 100.62  
 Nucleus 13C

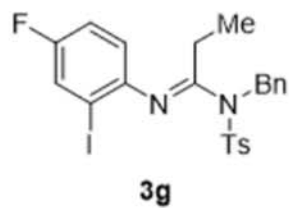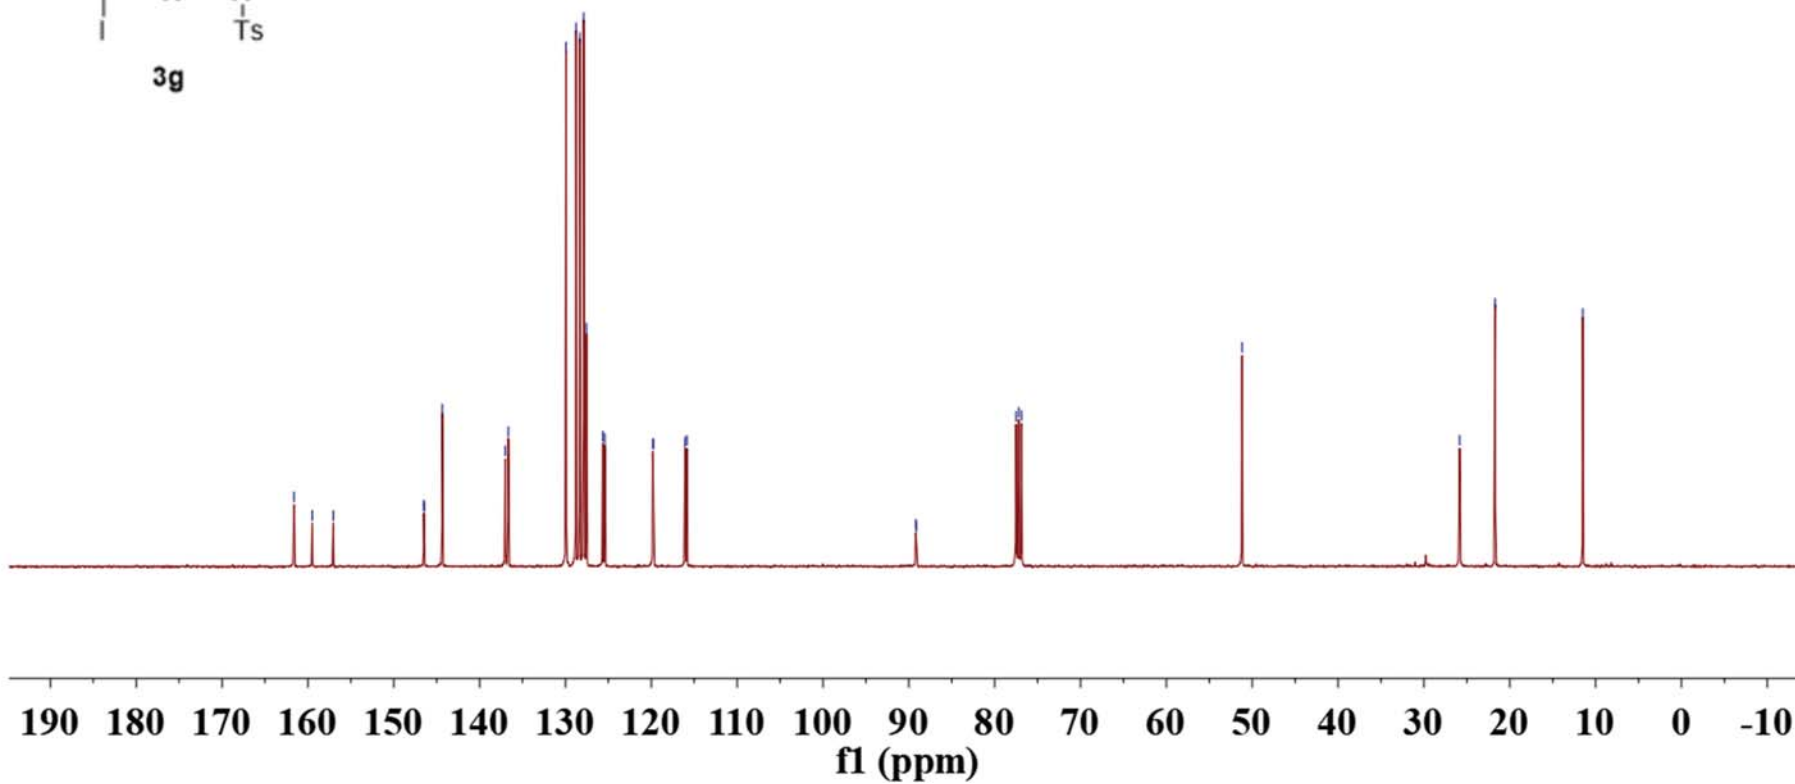

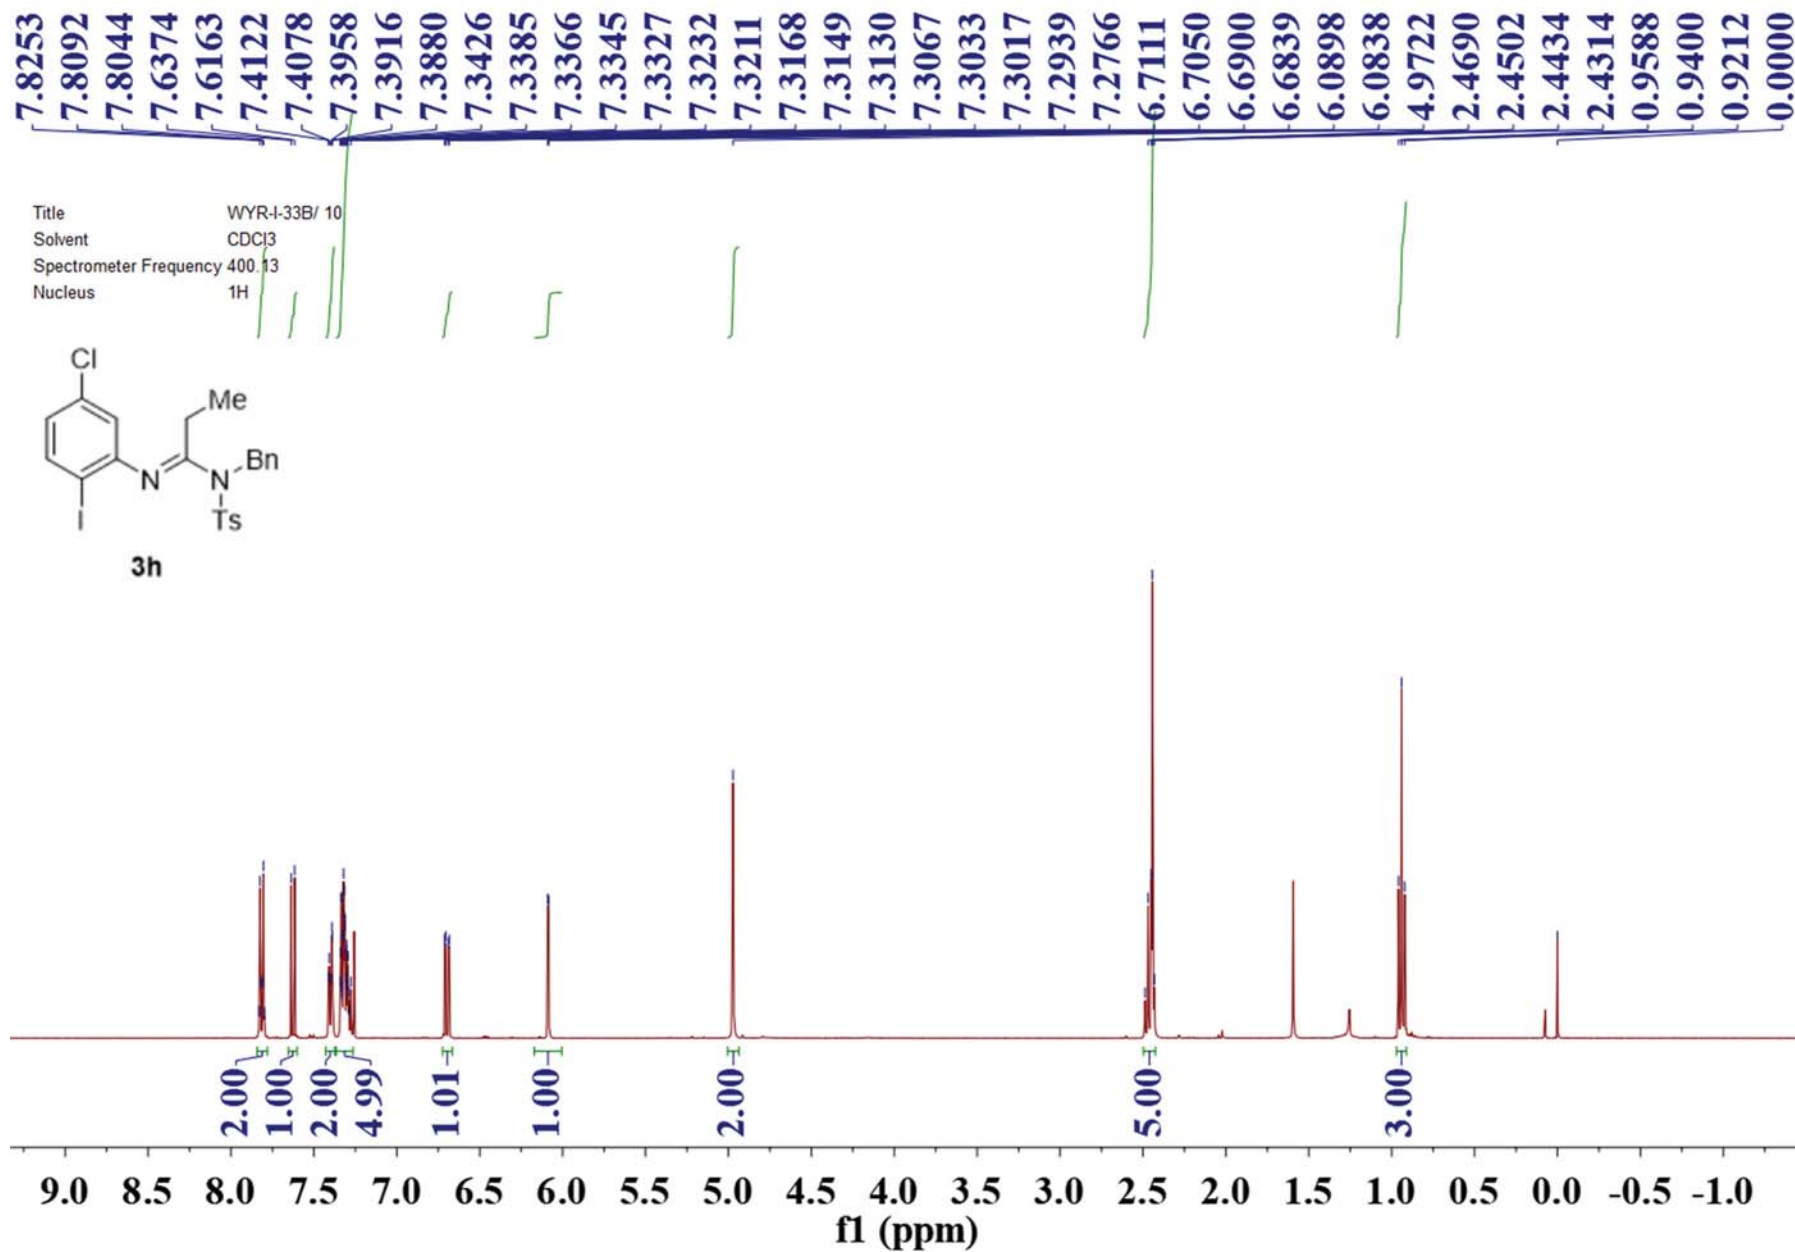

161.335  
151.195  
144.520  
139.858  
136.945  
136.748  
134.878  
130.012  
128.783  
128.477  
128.004  
127.730  
124.773  
119.684

87.457  
77.518  
77.200  
76.882

-51.295

26.125  
21.802  
11.631

Title WYR-I-33B.10.fid  
Solvent CDCl3  
Spectrometer Frequency 100.62  
Nucleus 13C

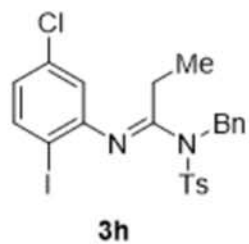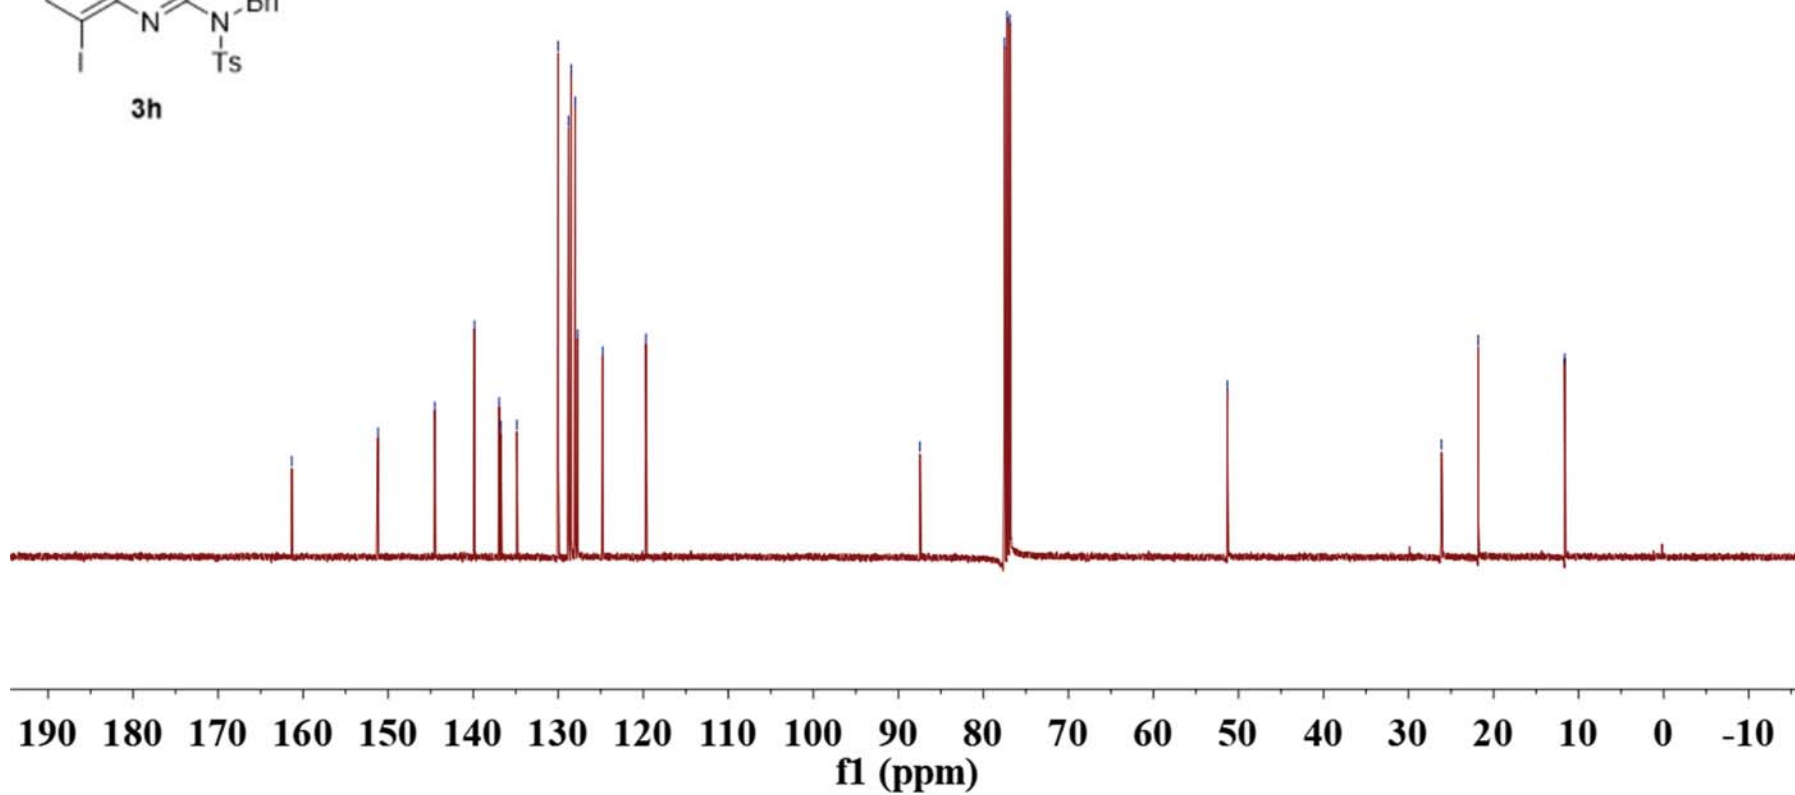

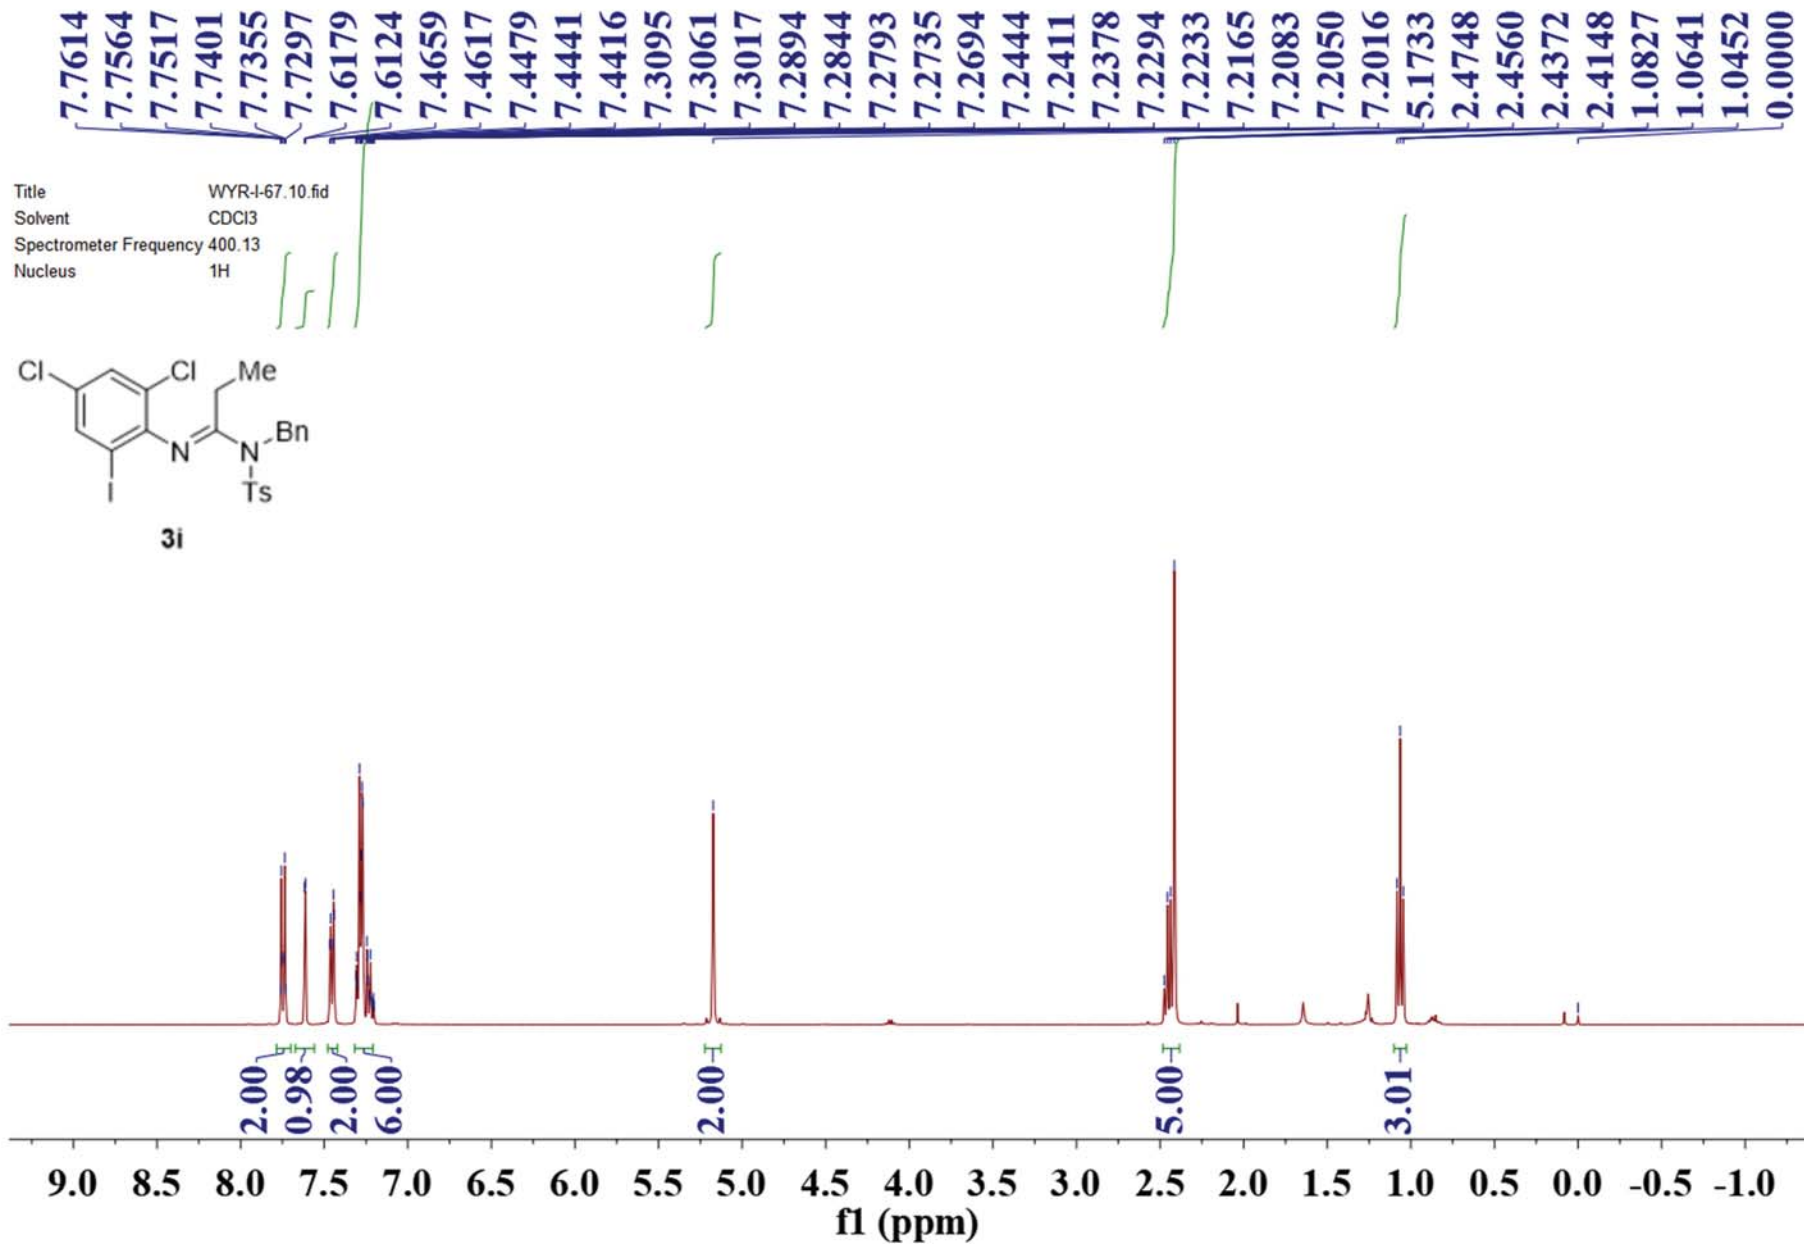

162.802  
 146.244  
 144.561  
 137.351  
 137.146  
 137.024  
 129.899  
 129.707  
 128.683  
 128.447  
 128.231  
 127.833  
 127.451  
 123.553  
 90.778  
 77.518  
 77.200  
 76.882  
 -51.237  
 26.525  
 21.737  
 11.255

Title WYR-I-67.10.fid  
 Solvent CDCl3  
 Spectrometer Frequency 100.62  
 Nucleus 13C

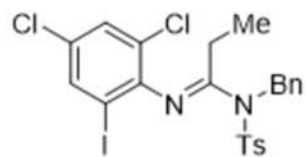

3i

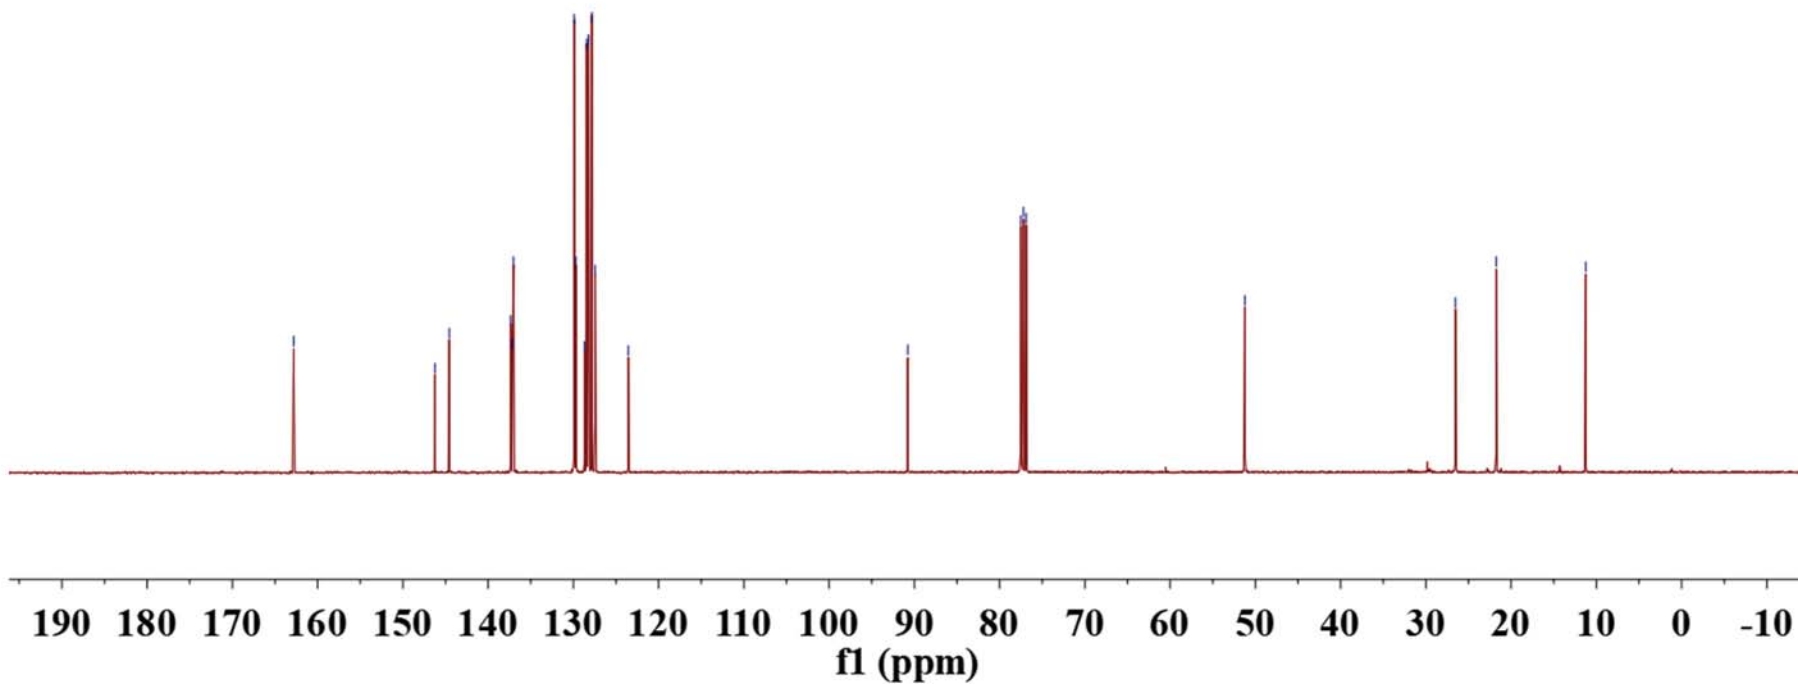

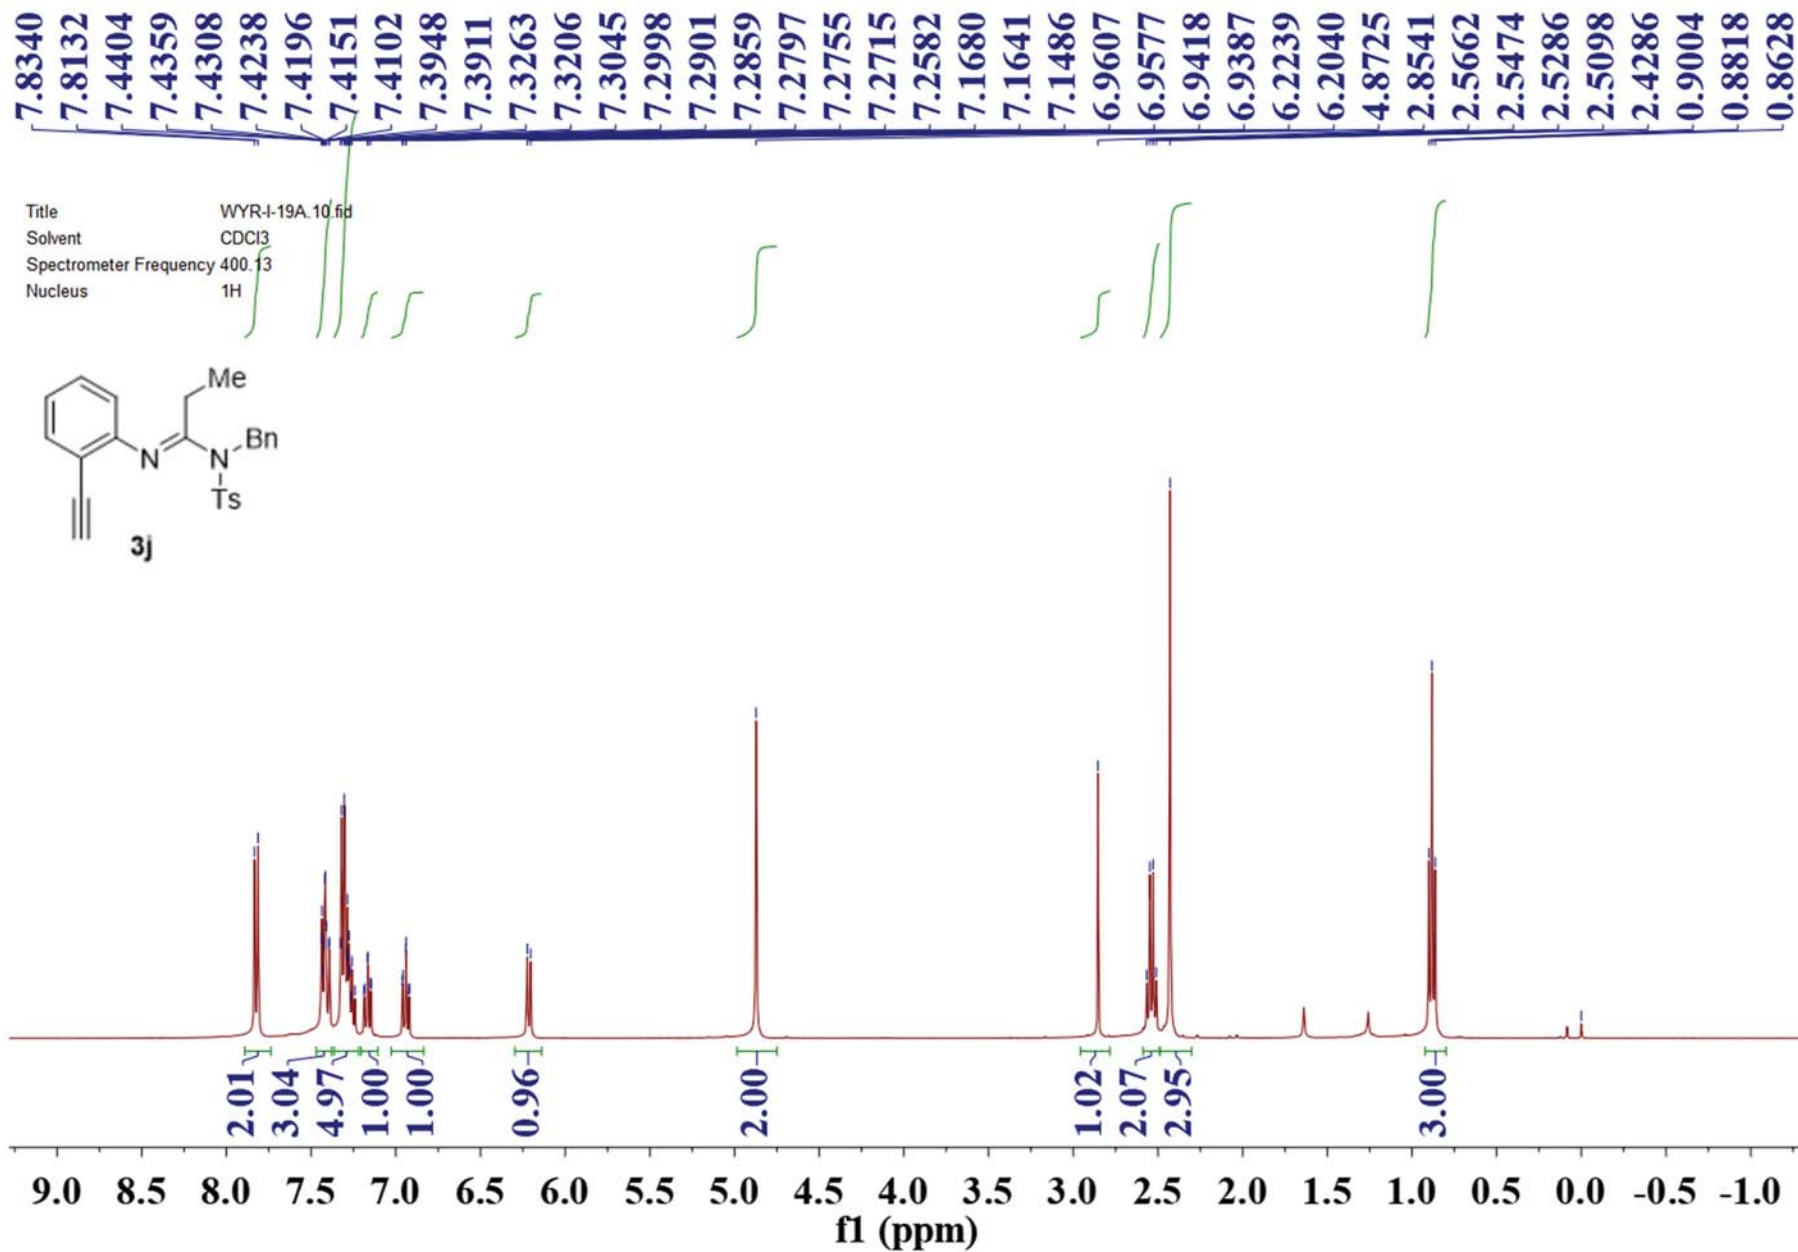



160.799  
 150.655  
 144.180  
 137.090  
 136.673  
 133.399  
 129.855  
 129.717  
 129.122  
 128.298  
 127.855  
 127.574  
 123.133  
 119.791  
 112.314  
 81.269  
 80.965  
 77.518  
 77.200  
 76.882  
 -51.185  
 26.338  
 21.775  
 11.507

Title WYR-I-19.10.fid  
 Solvent CDCl3  
 Spectrometer Frequency 100.62  
 Nucleus 13C

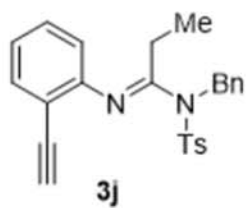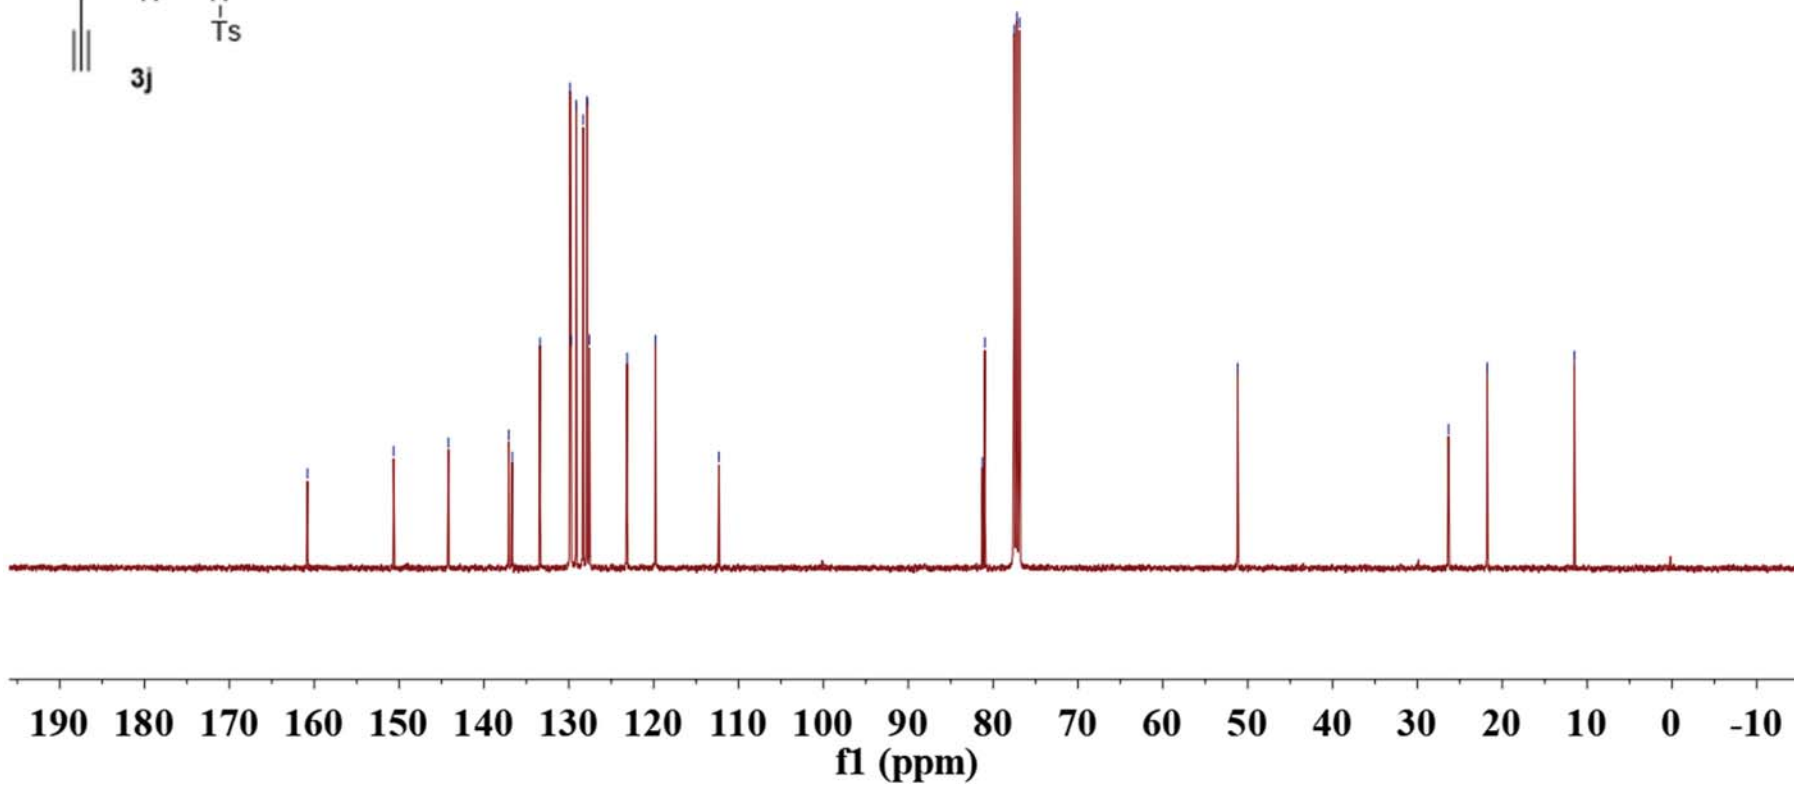

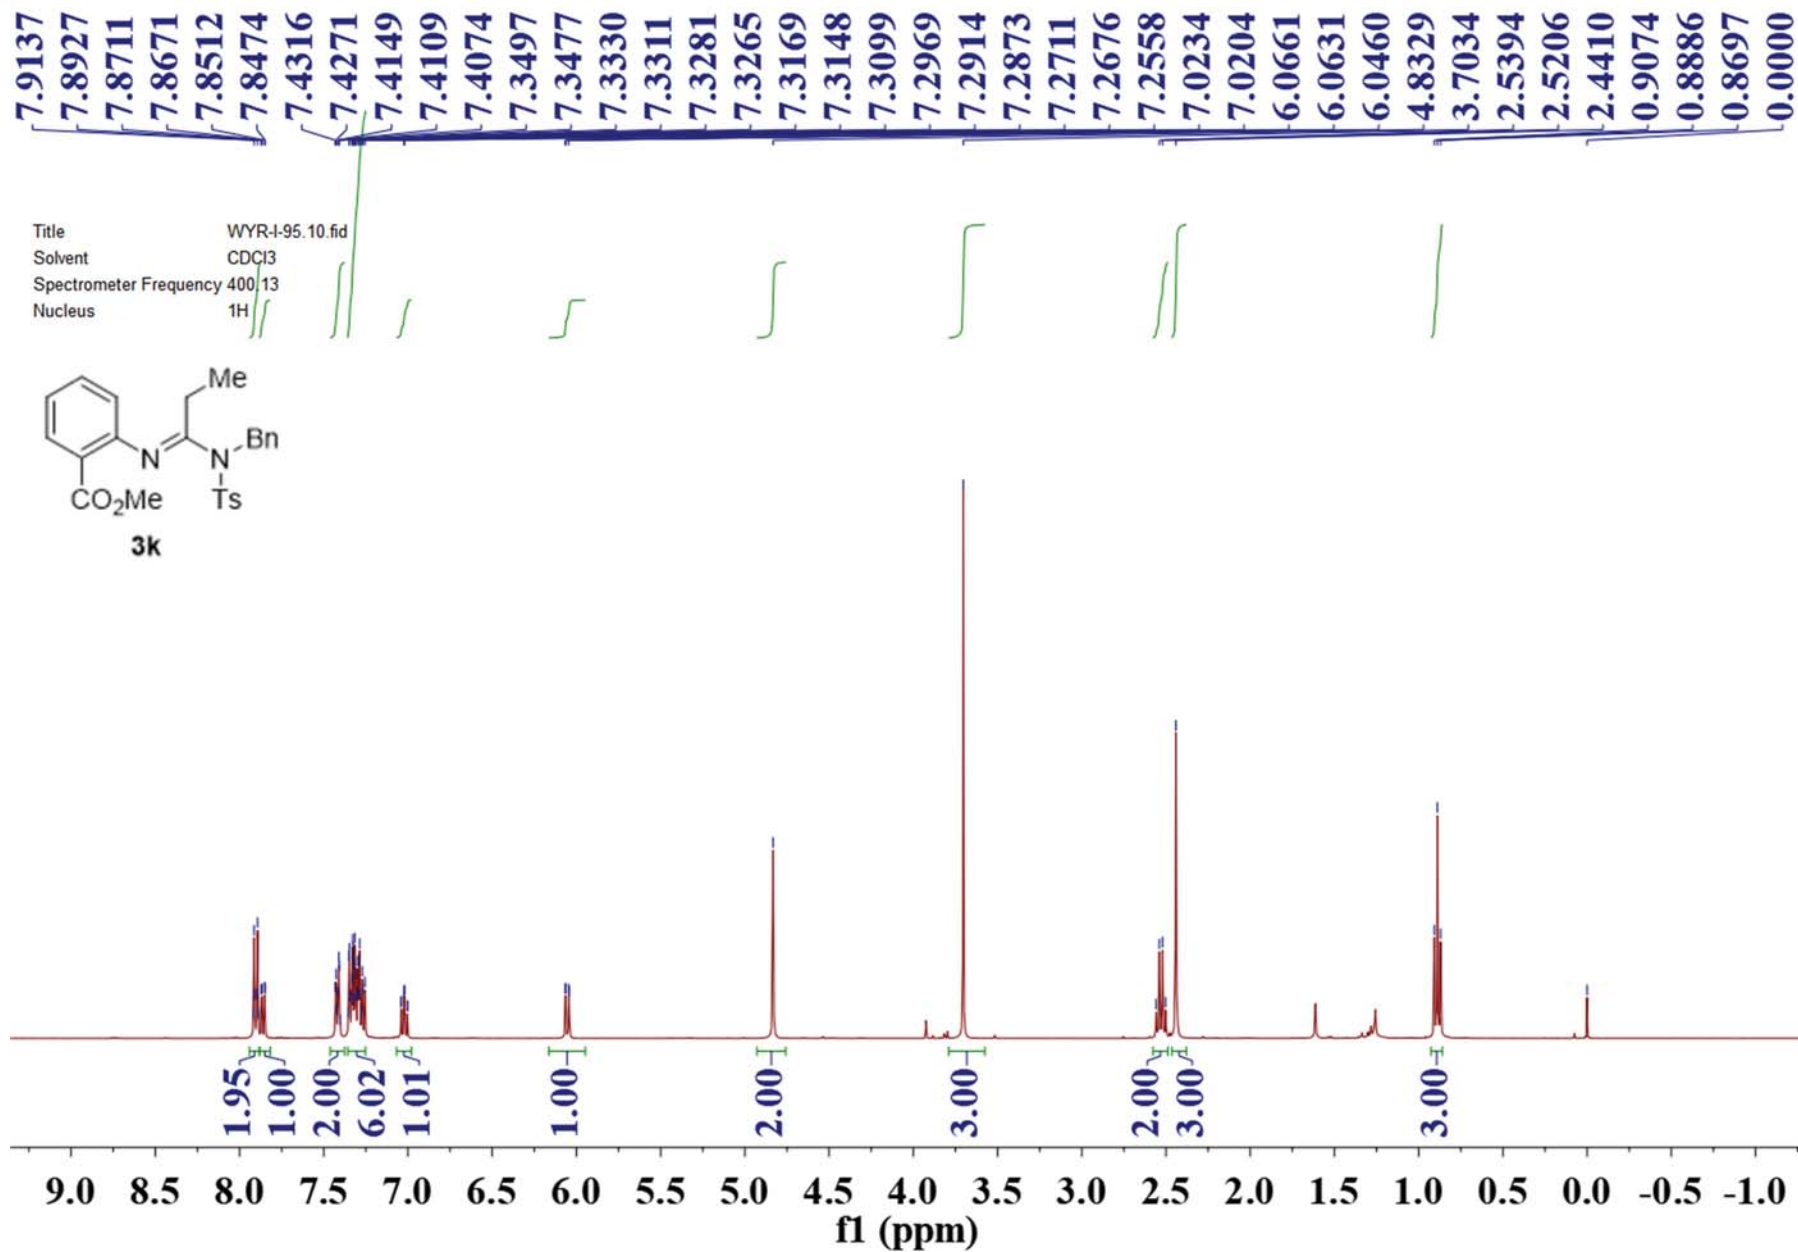

166.498  
159.073  
149.193  
144.064  
137.244  
136.811  
133.034  
131.119  
129.840  
129.016  
128.317  
128.037  
127.570  
122.883  
120.972  
120.003

77.518  
77.200  
76.882

51.900  
51.220

26.669  
21.795  
11.523

Title WYR-I-95/ 10  
Solvent CDCl3  
Spectrometer Frequency 100.62  
Nucleus 13C

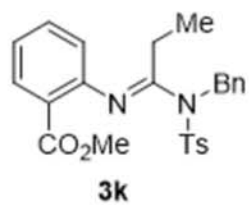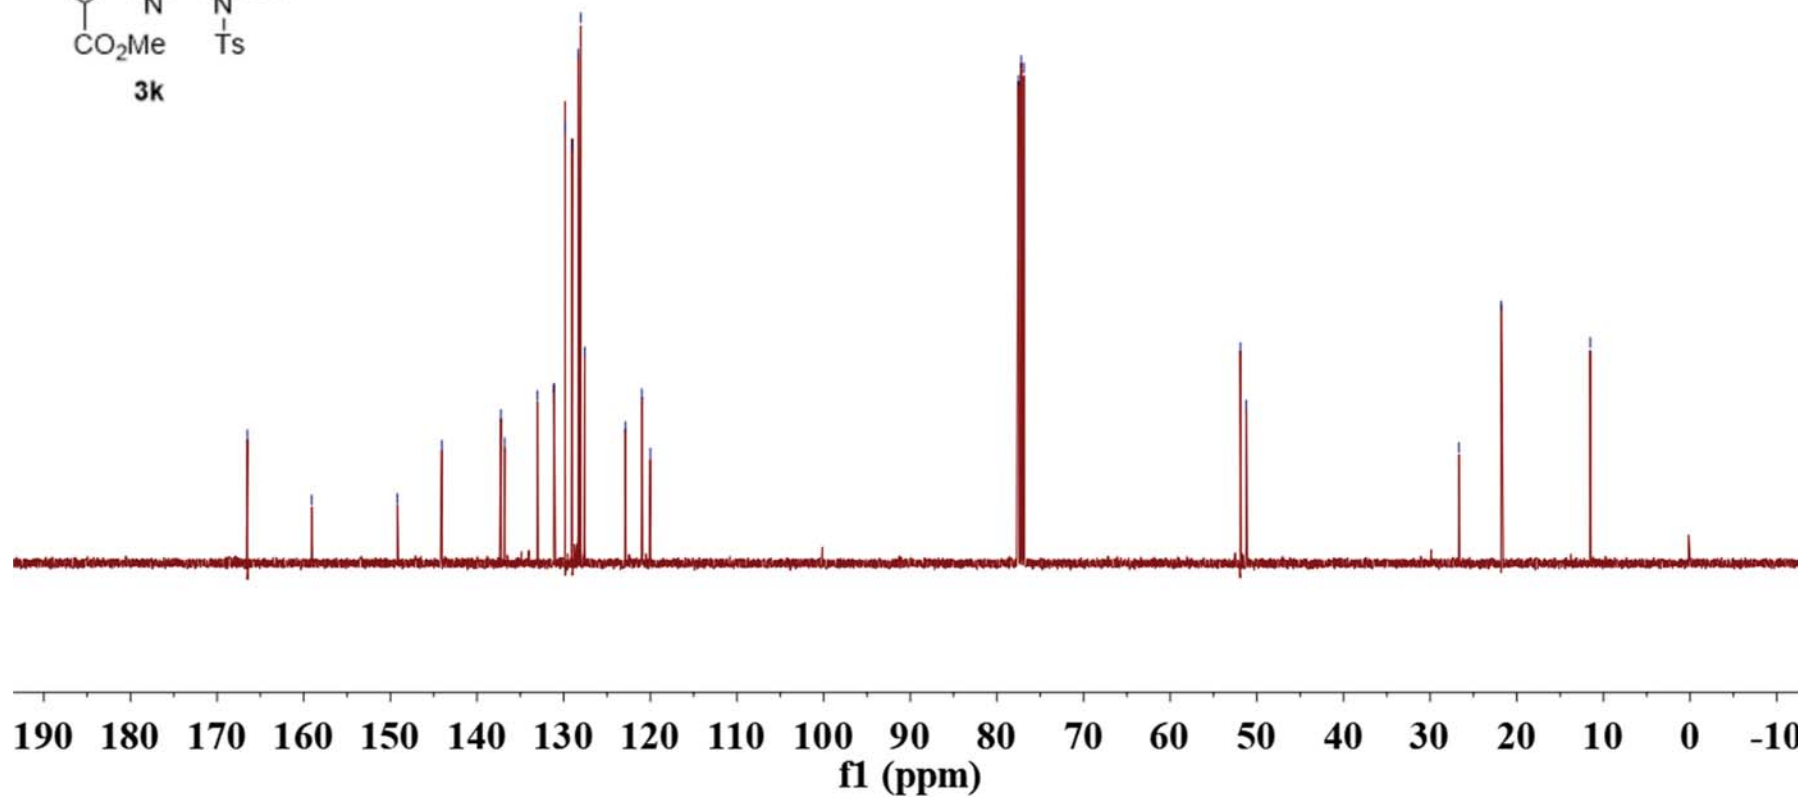

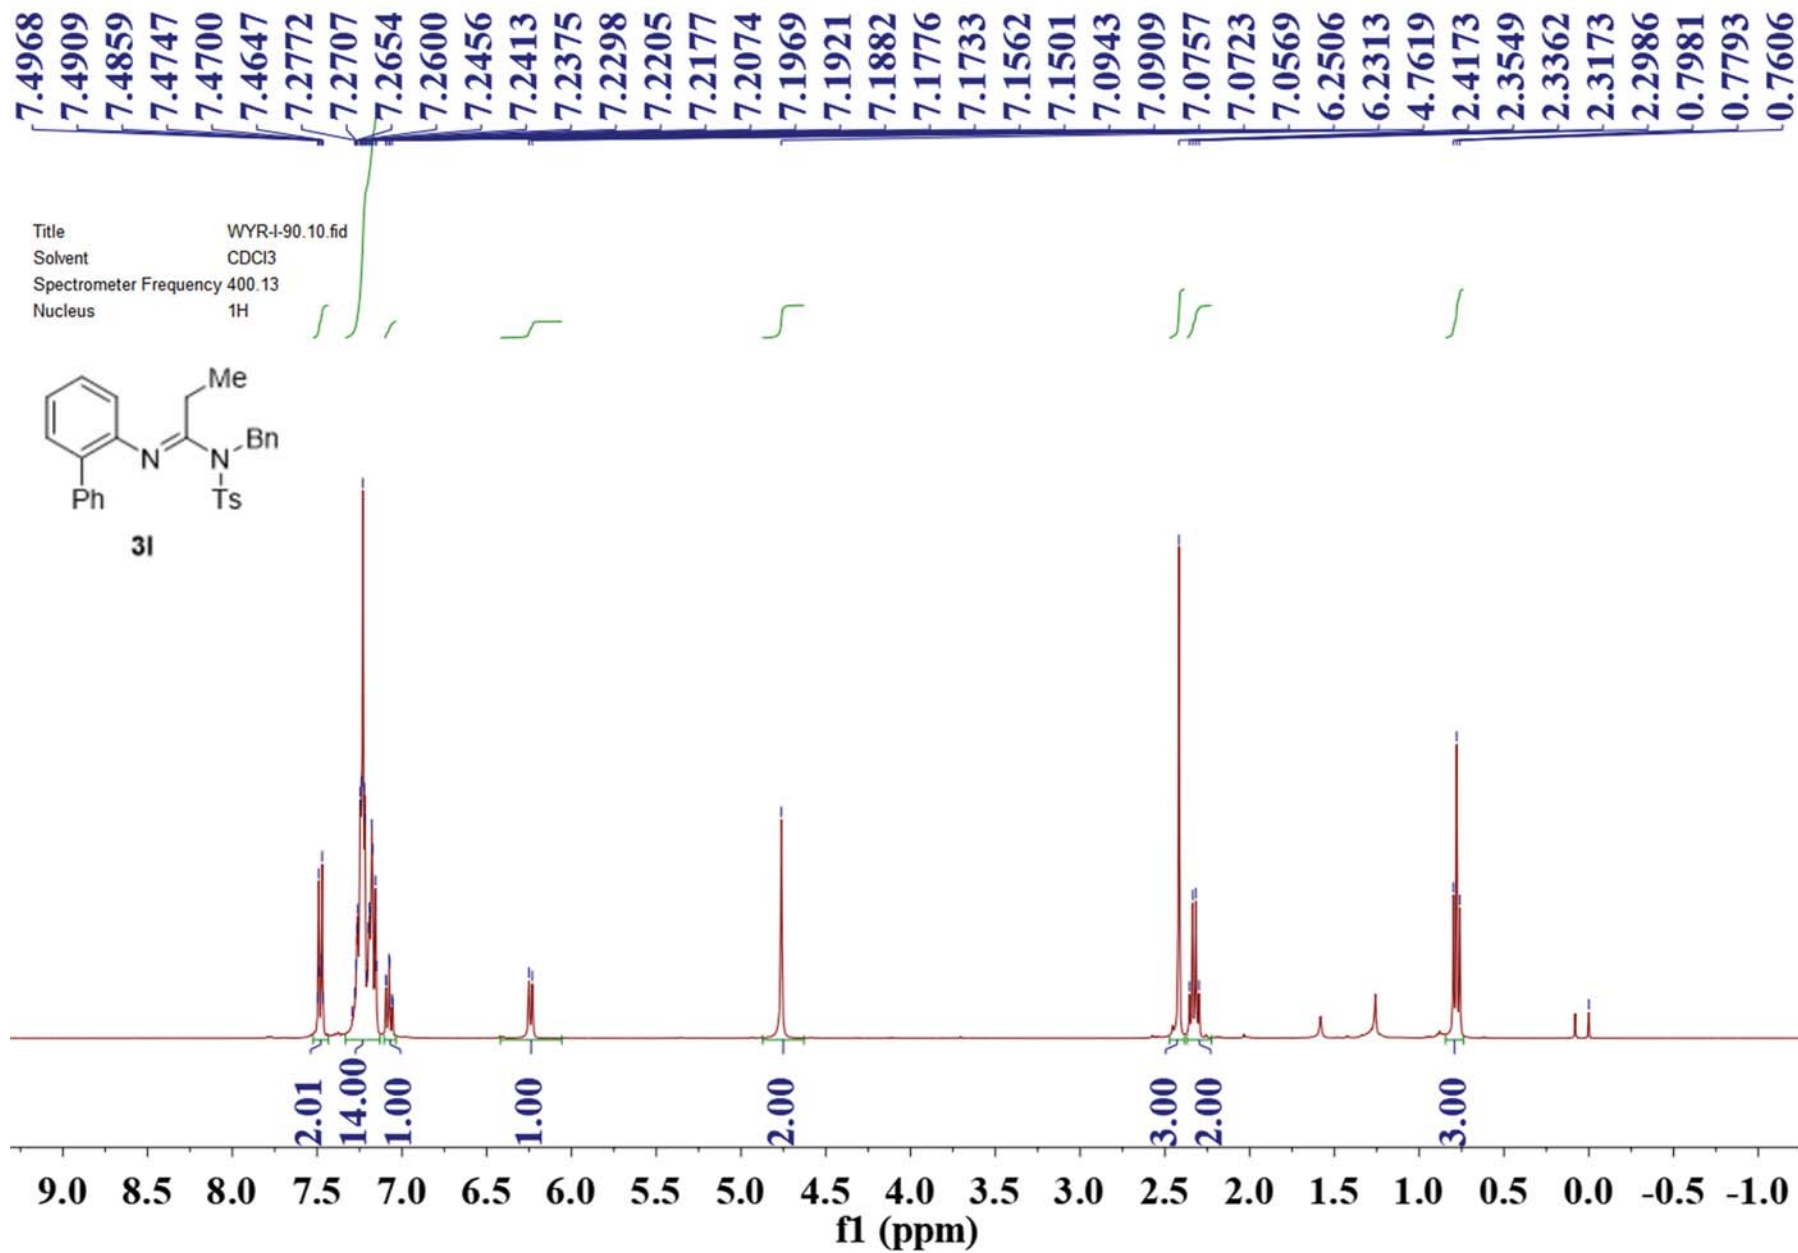

159.023  
 146.071  
 143.689  
 139.906  
 137.159  
 137.057  
 132.235  
 130.612  
 129.636  
 129.263  
 128.480  
 128.385  
 128.220  
 128.111  
 127.819  
 127.473  
 126.760  
 123.729  
 120.030  
 77.518  
 77.200  
 76.882  
 50.750  
 25.680  
 21.754  
 11.375

Title WYR-I-90.11.fid  
 Solvent CDCl3  
 Spectrometer Frequency 100.62  
 Nucleus 13C

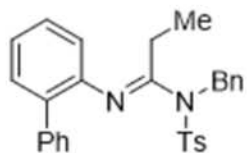

3I

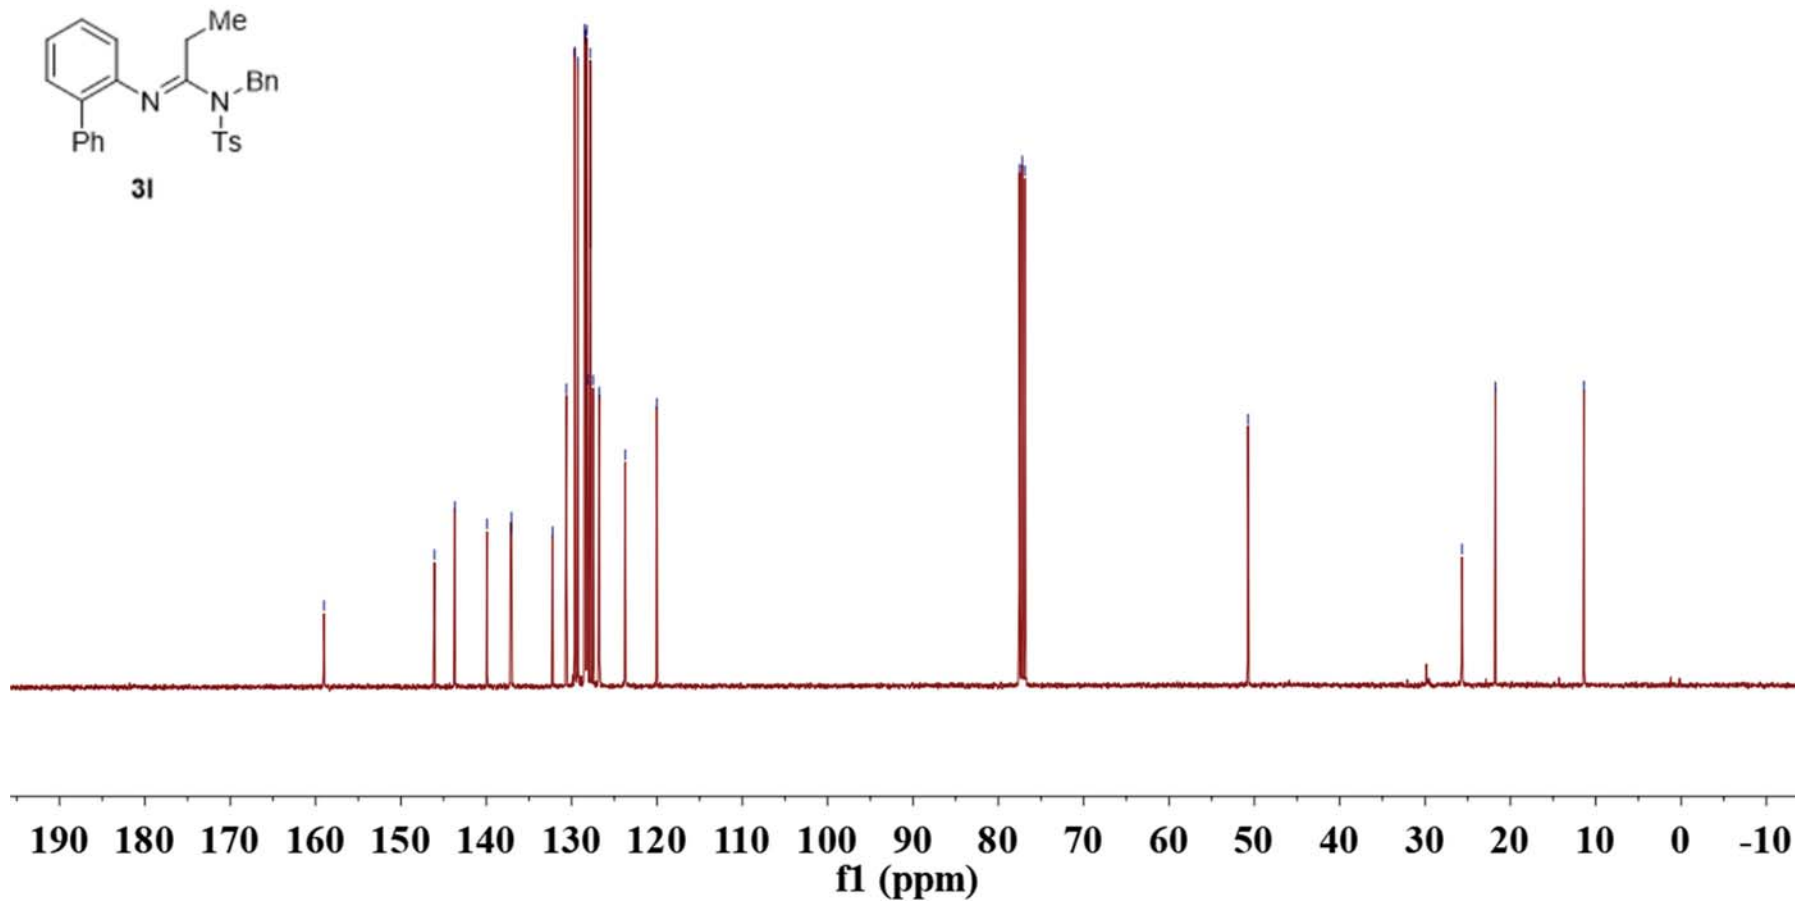

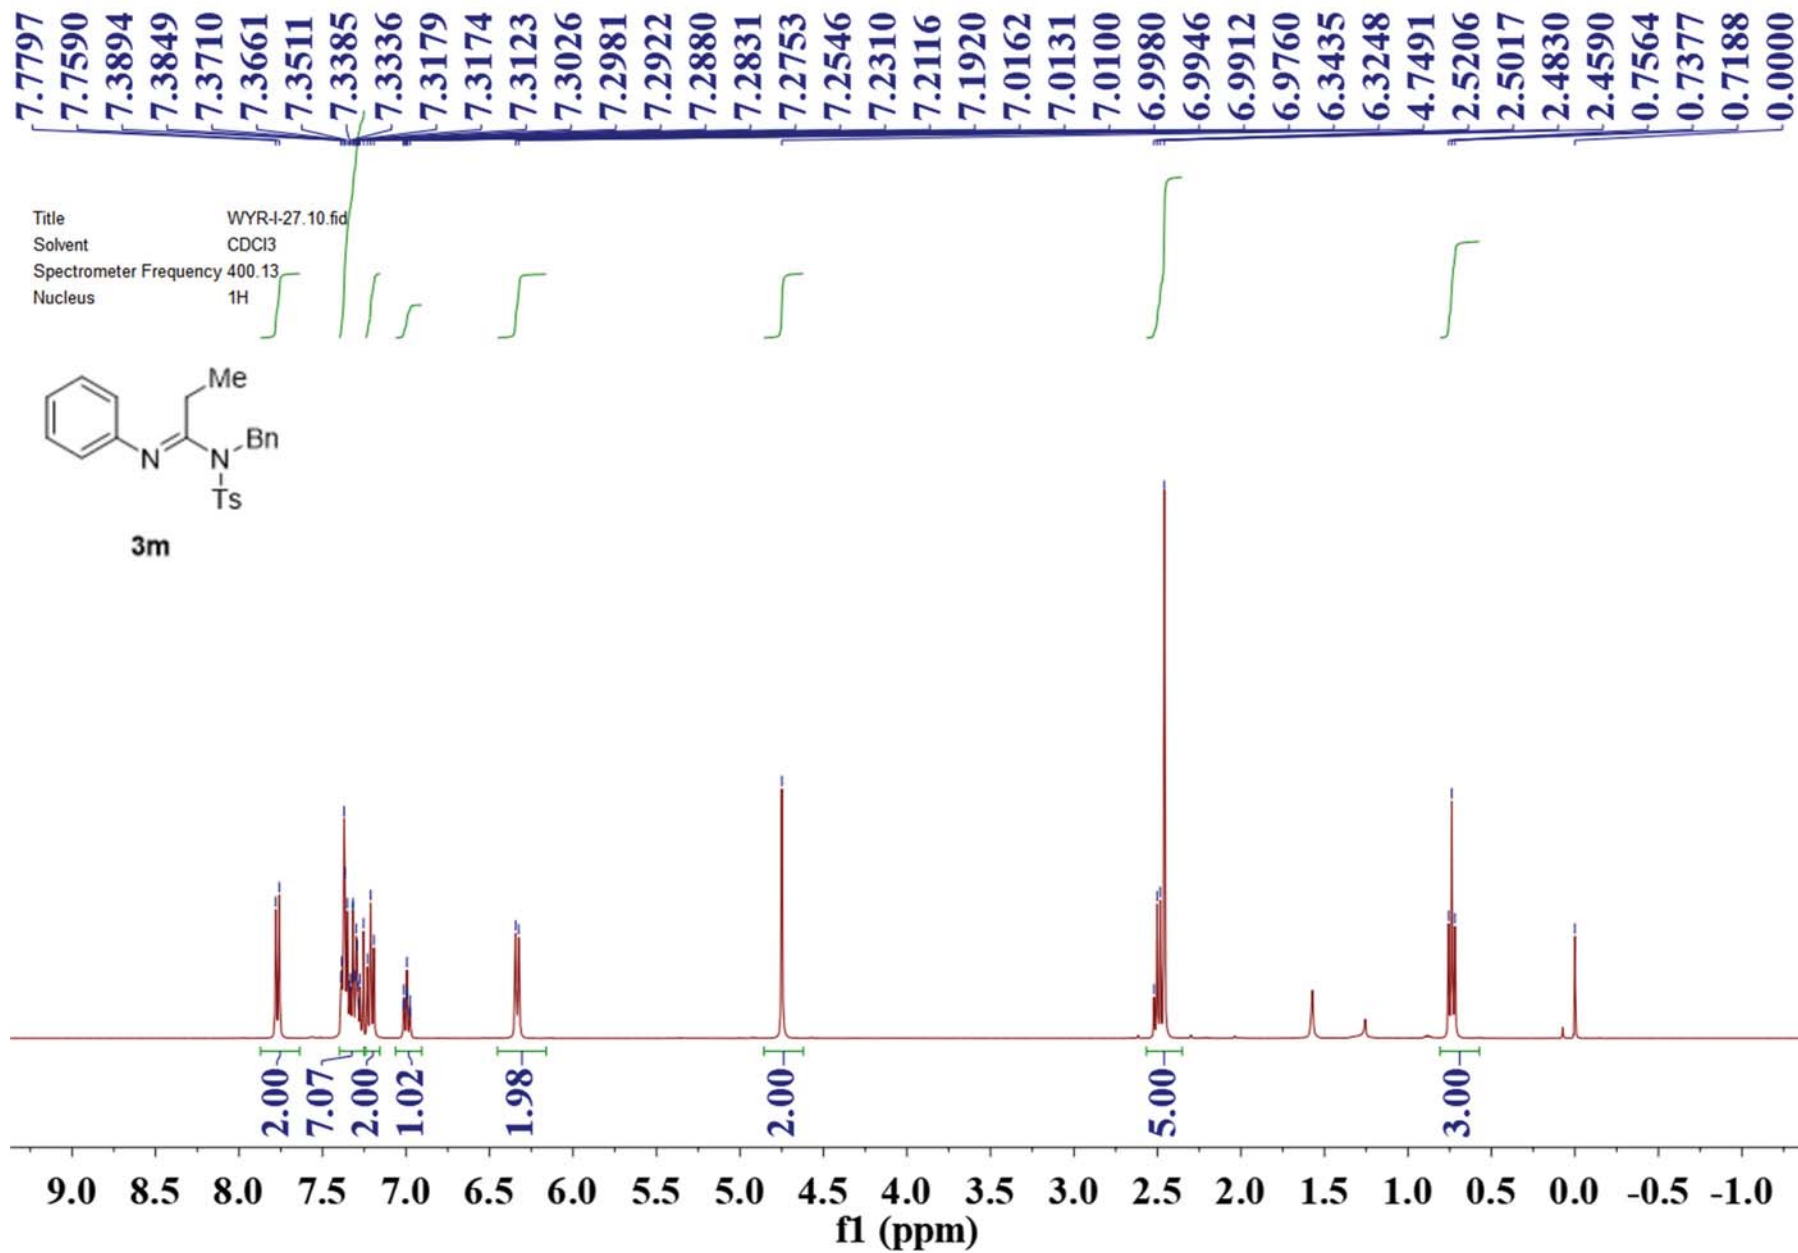

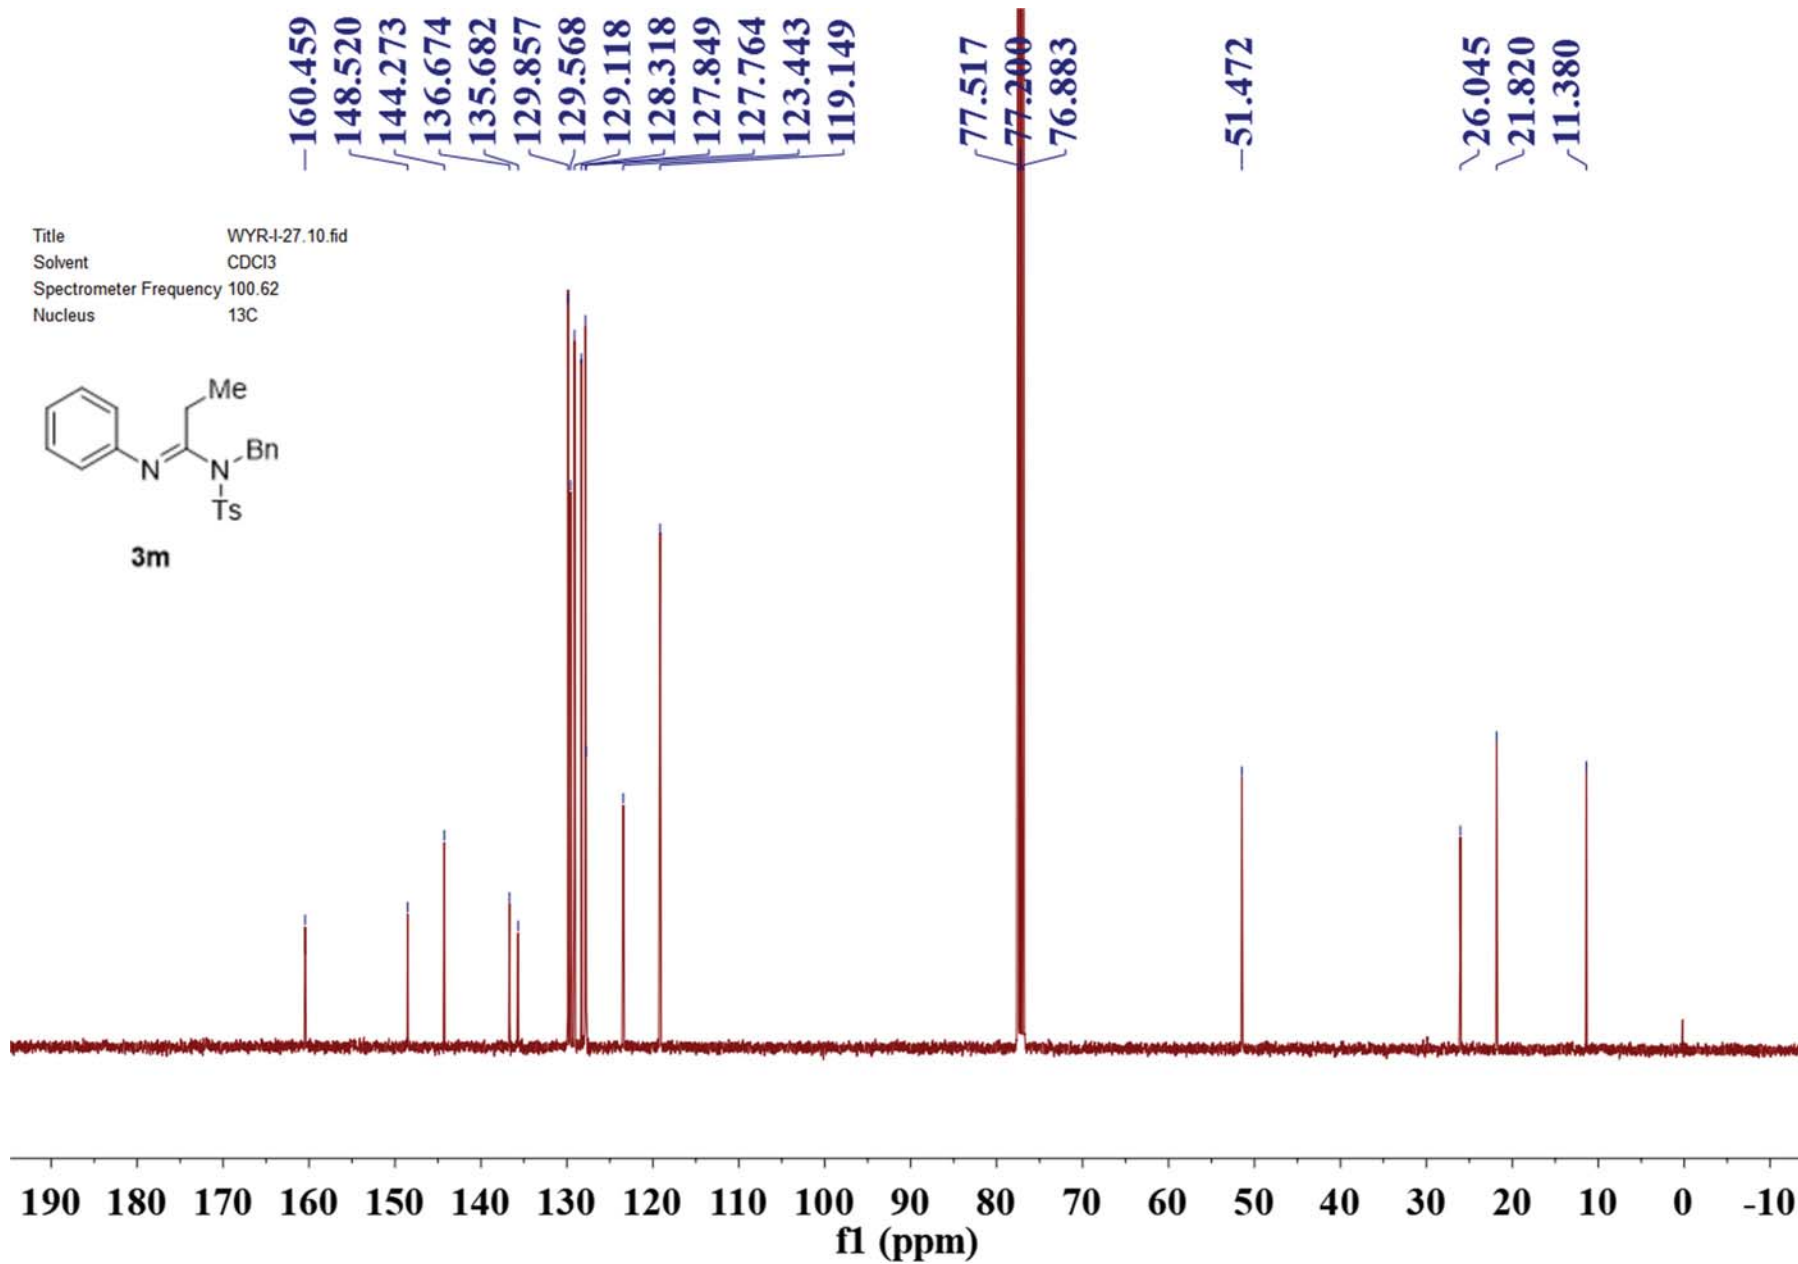

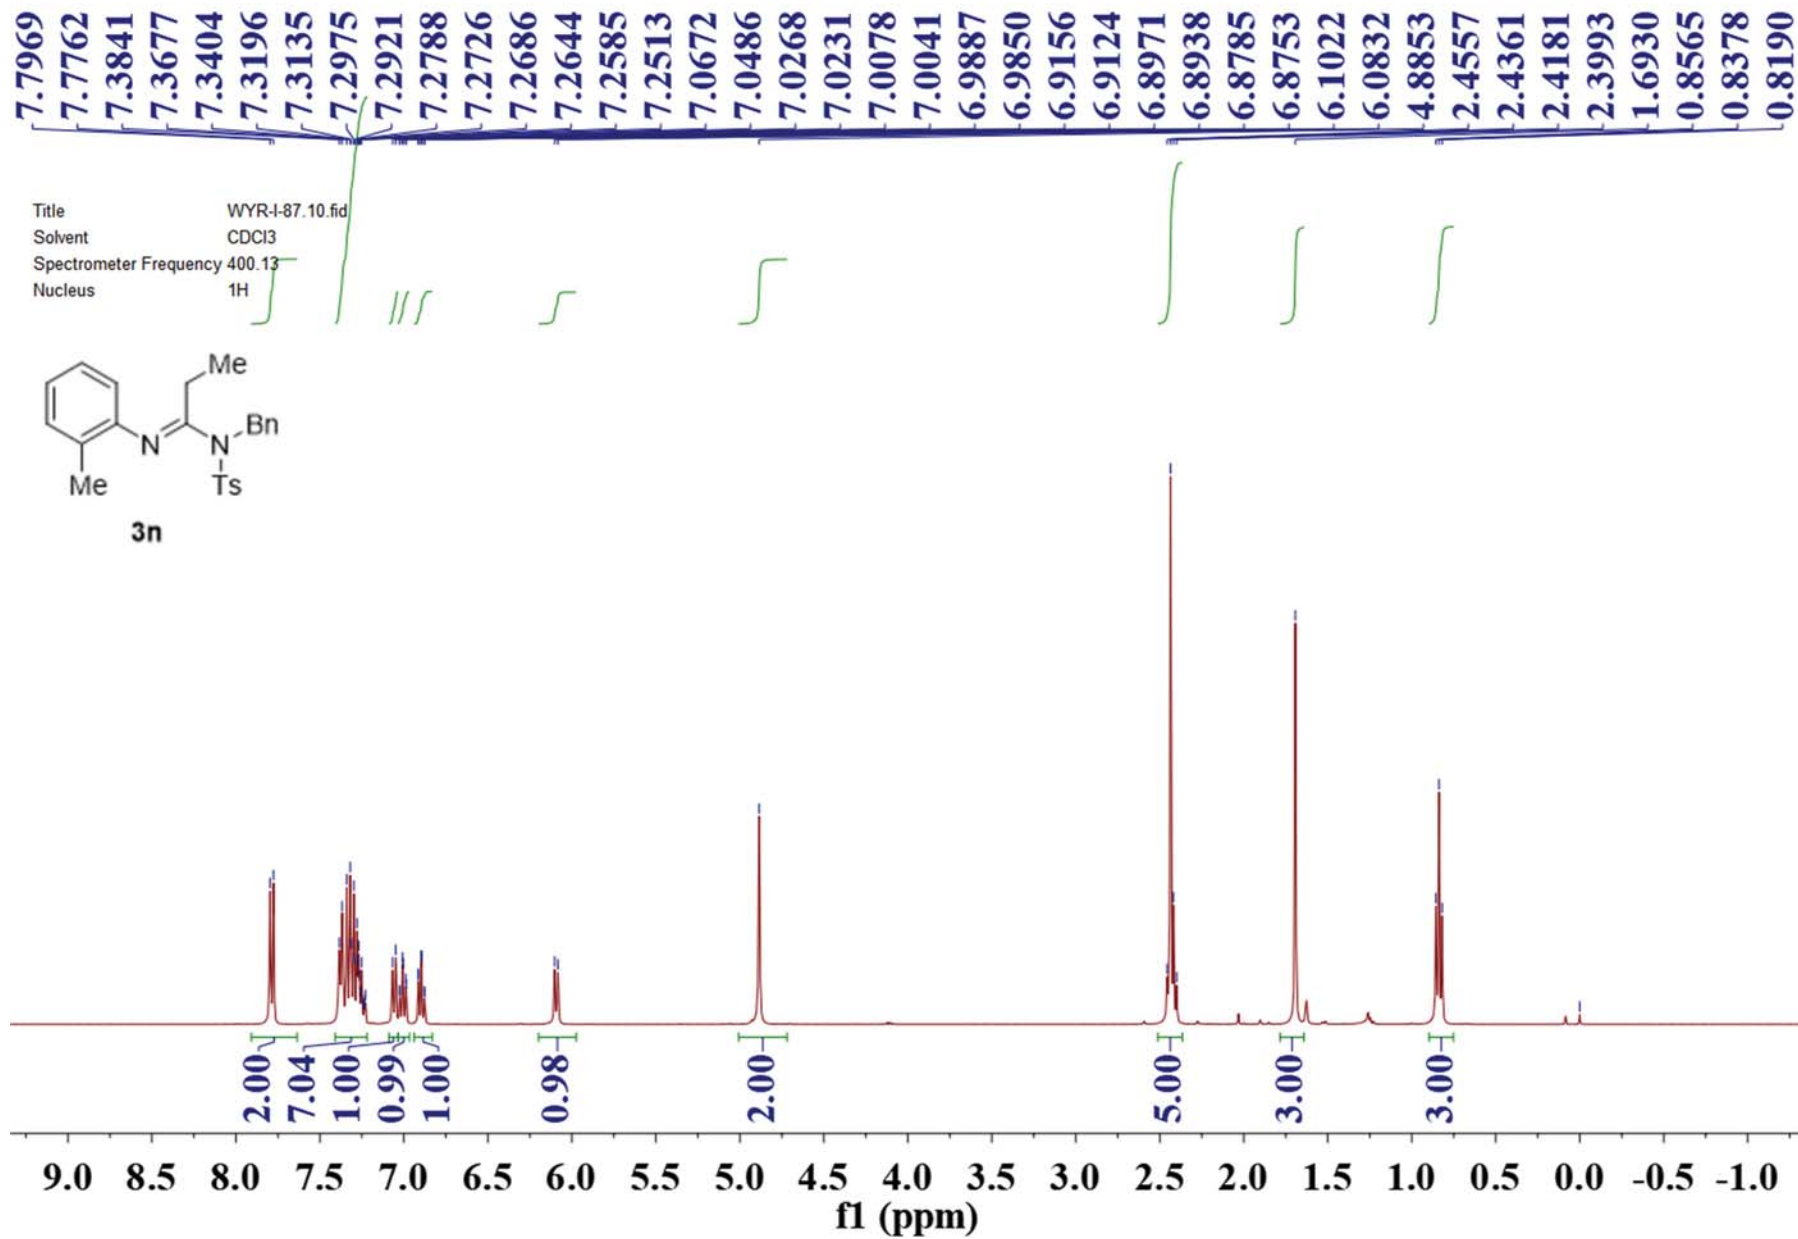



159.580  
 147.190  
 144.211  
 137.001  
 136.337  
 130.433  
 129.849  
 128.875  
 128.343  
 127.695  
 127.607  
 127.140  
 126.433  
 123.444  
 118.603  
 77.518  
 77.200  
 76.882  
 -51.235  
 ~25.845  
 ~21.723  
 ~17.732  
 ~11.246

Title WYR-I-87/ 10  
 Solvent CDCl3  
 Spectrometer Frequency 100.62  
 Nucleus 13C

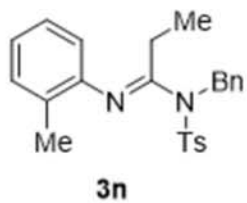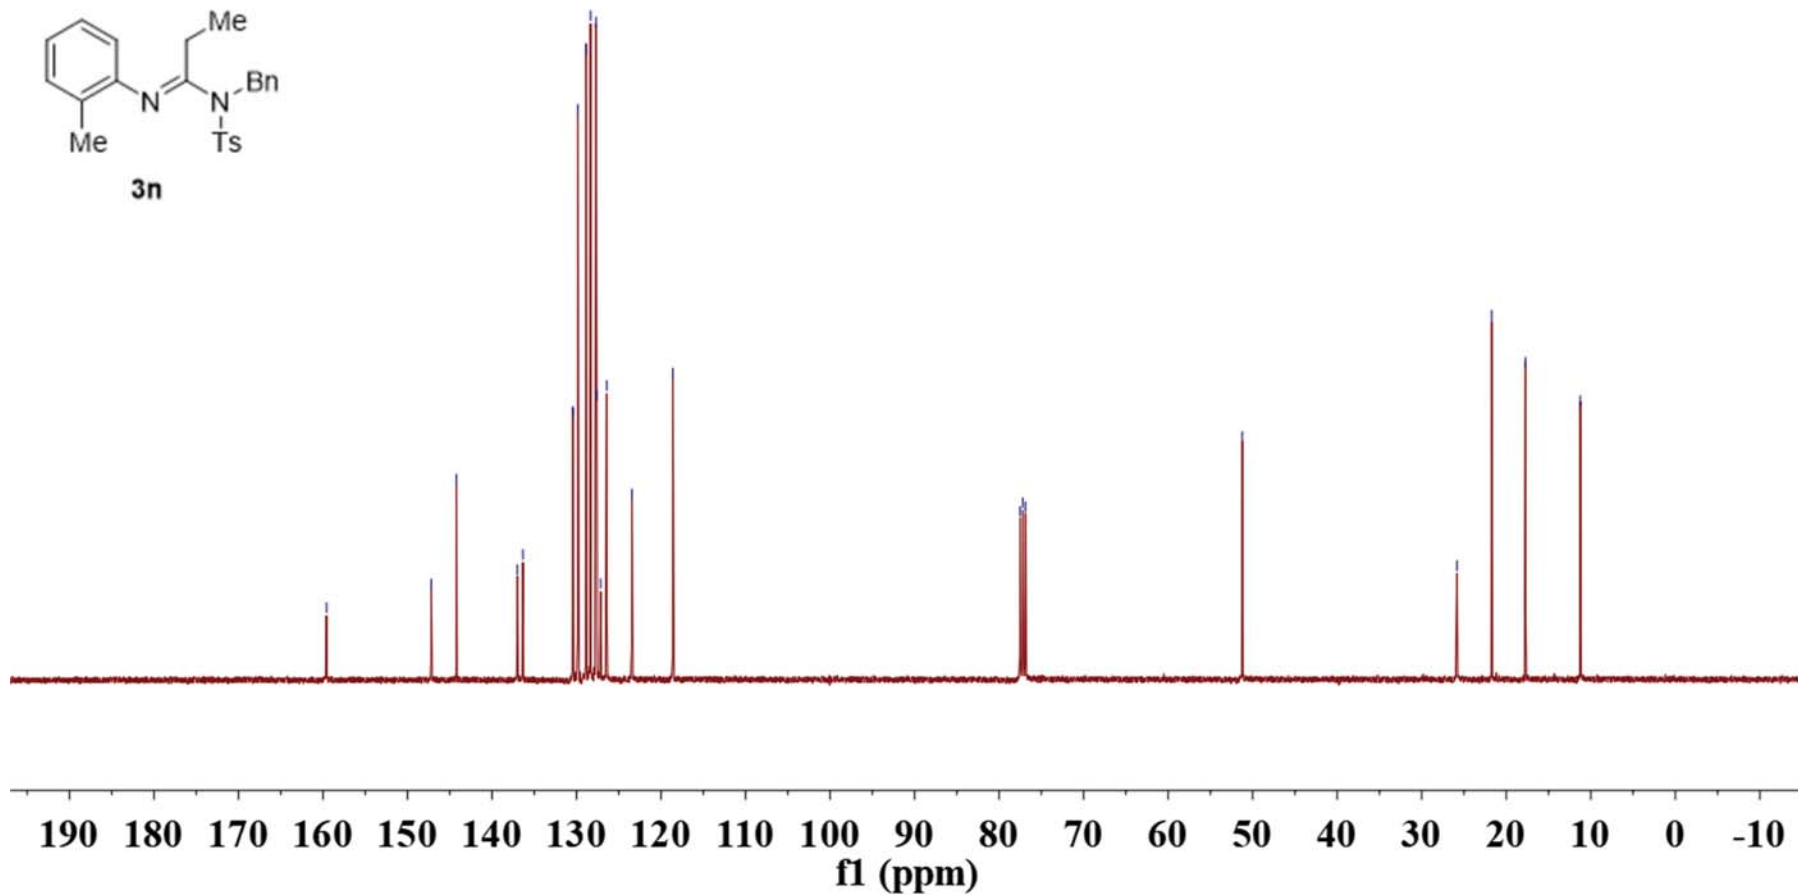

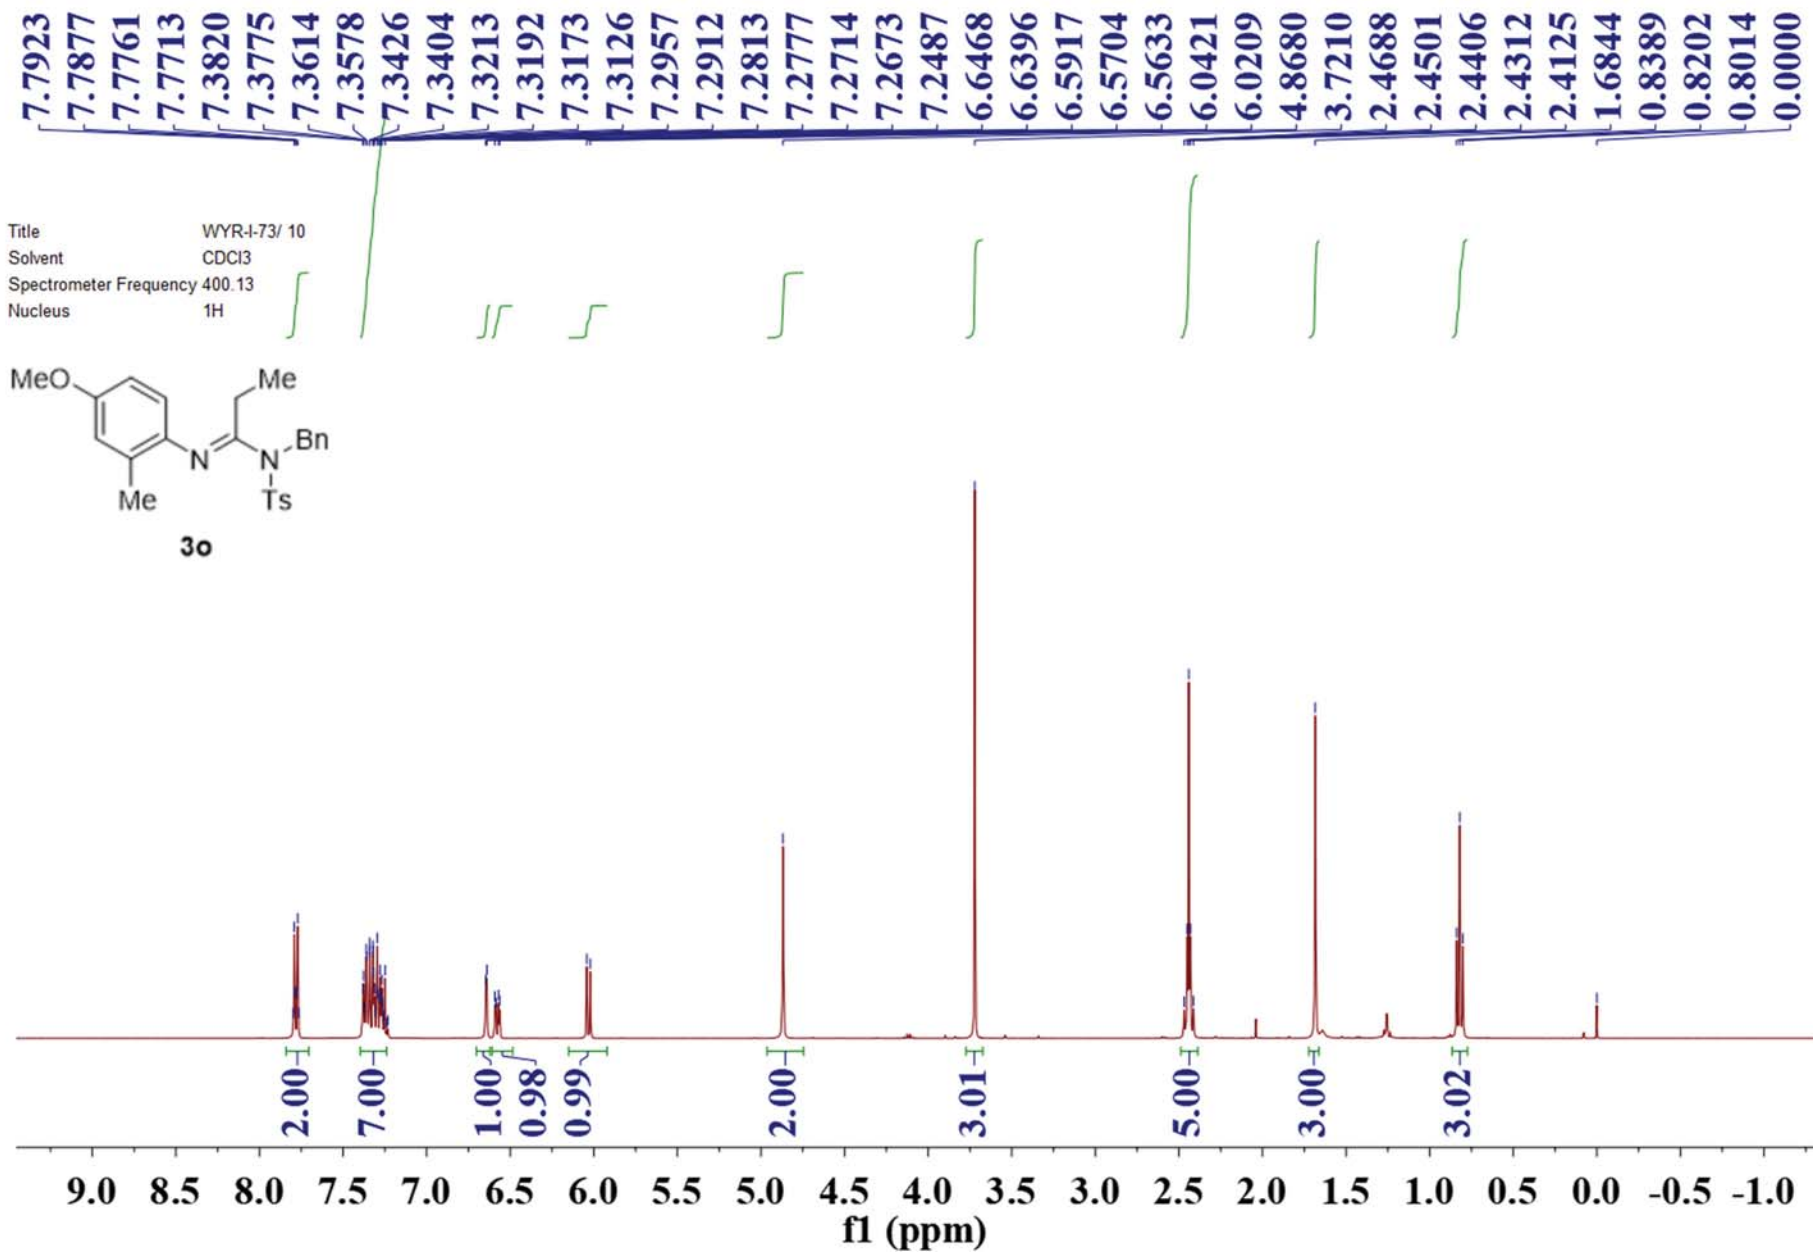

~160.355  
 ~155.954  
 144.173  
 140.637  
 137.055  
 136.345  
 ~129.844  
 128.939  
 128.634  
 128.348  
 127.743  
 127.612  
 119.383  
 115.988  
 111.526  
 77.518  
 77.200  
 76.882  
 ~55.509  
 ~51.270  
 ~25.768  
 ~21.750  
 ~18.058  
 ~11.218

Title WYR-I-73.10.fid  
 Solvent CDCl3  
 Spectrometer Frequency 100.62  
 Nucleus 13C

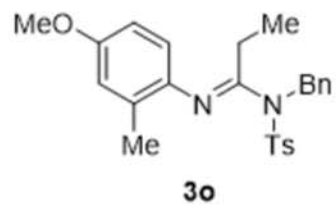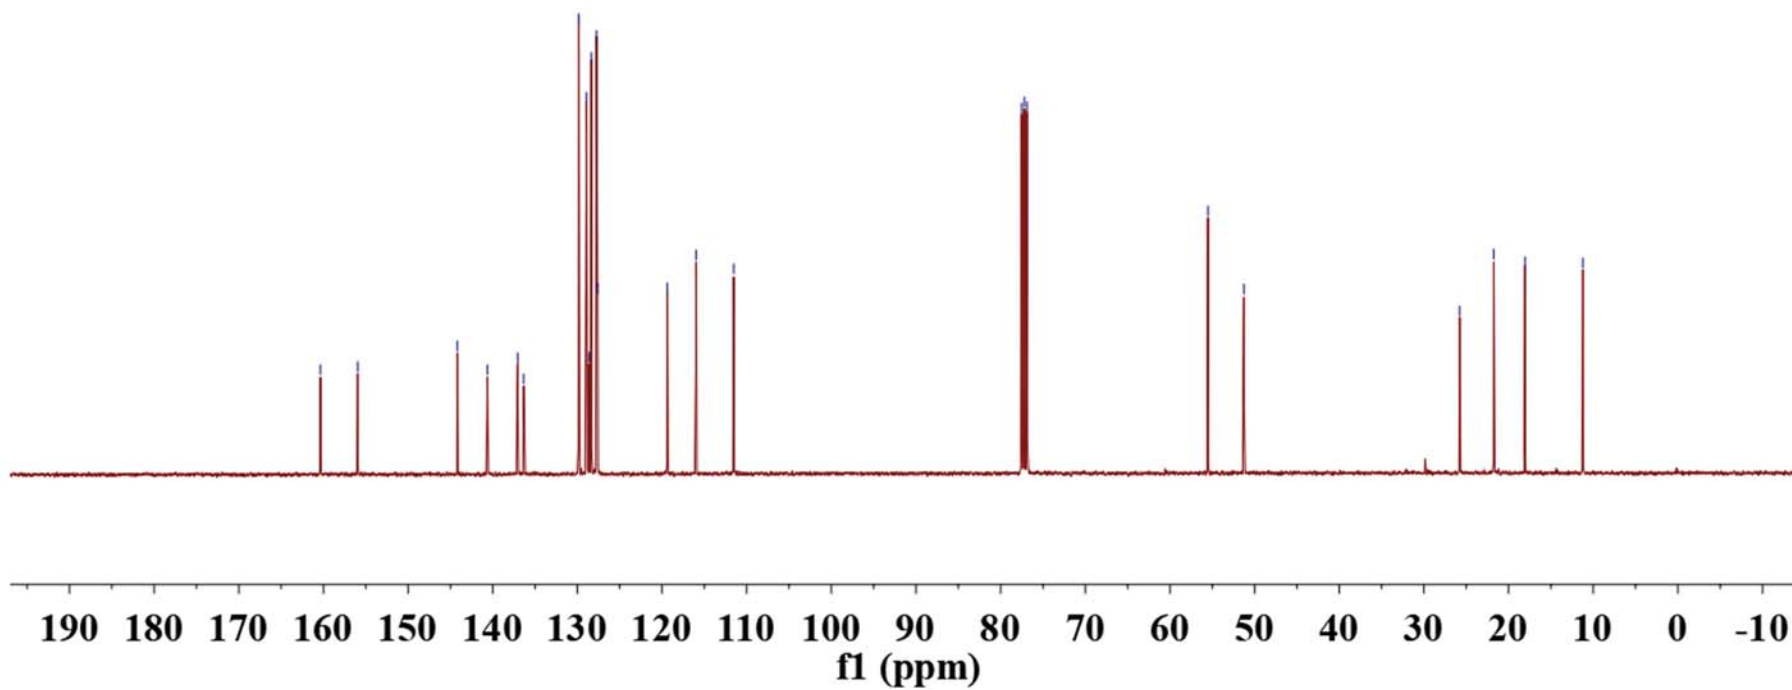

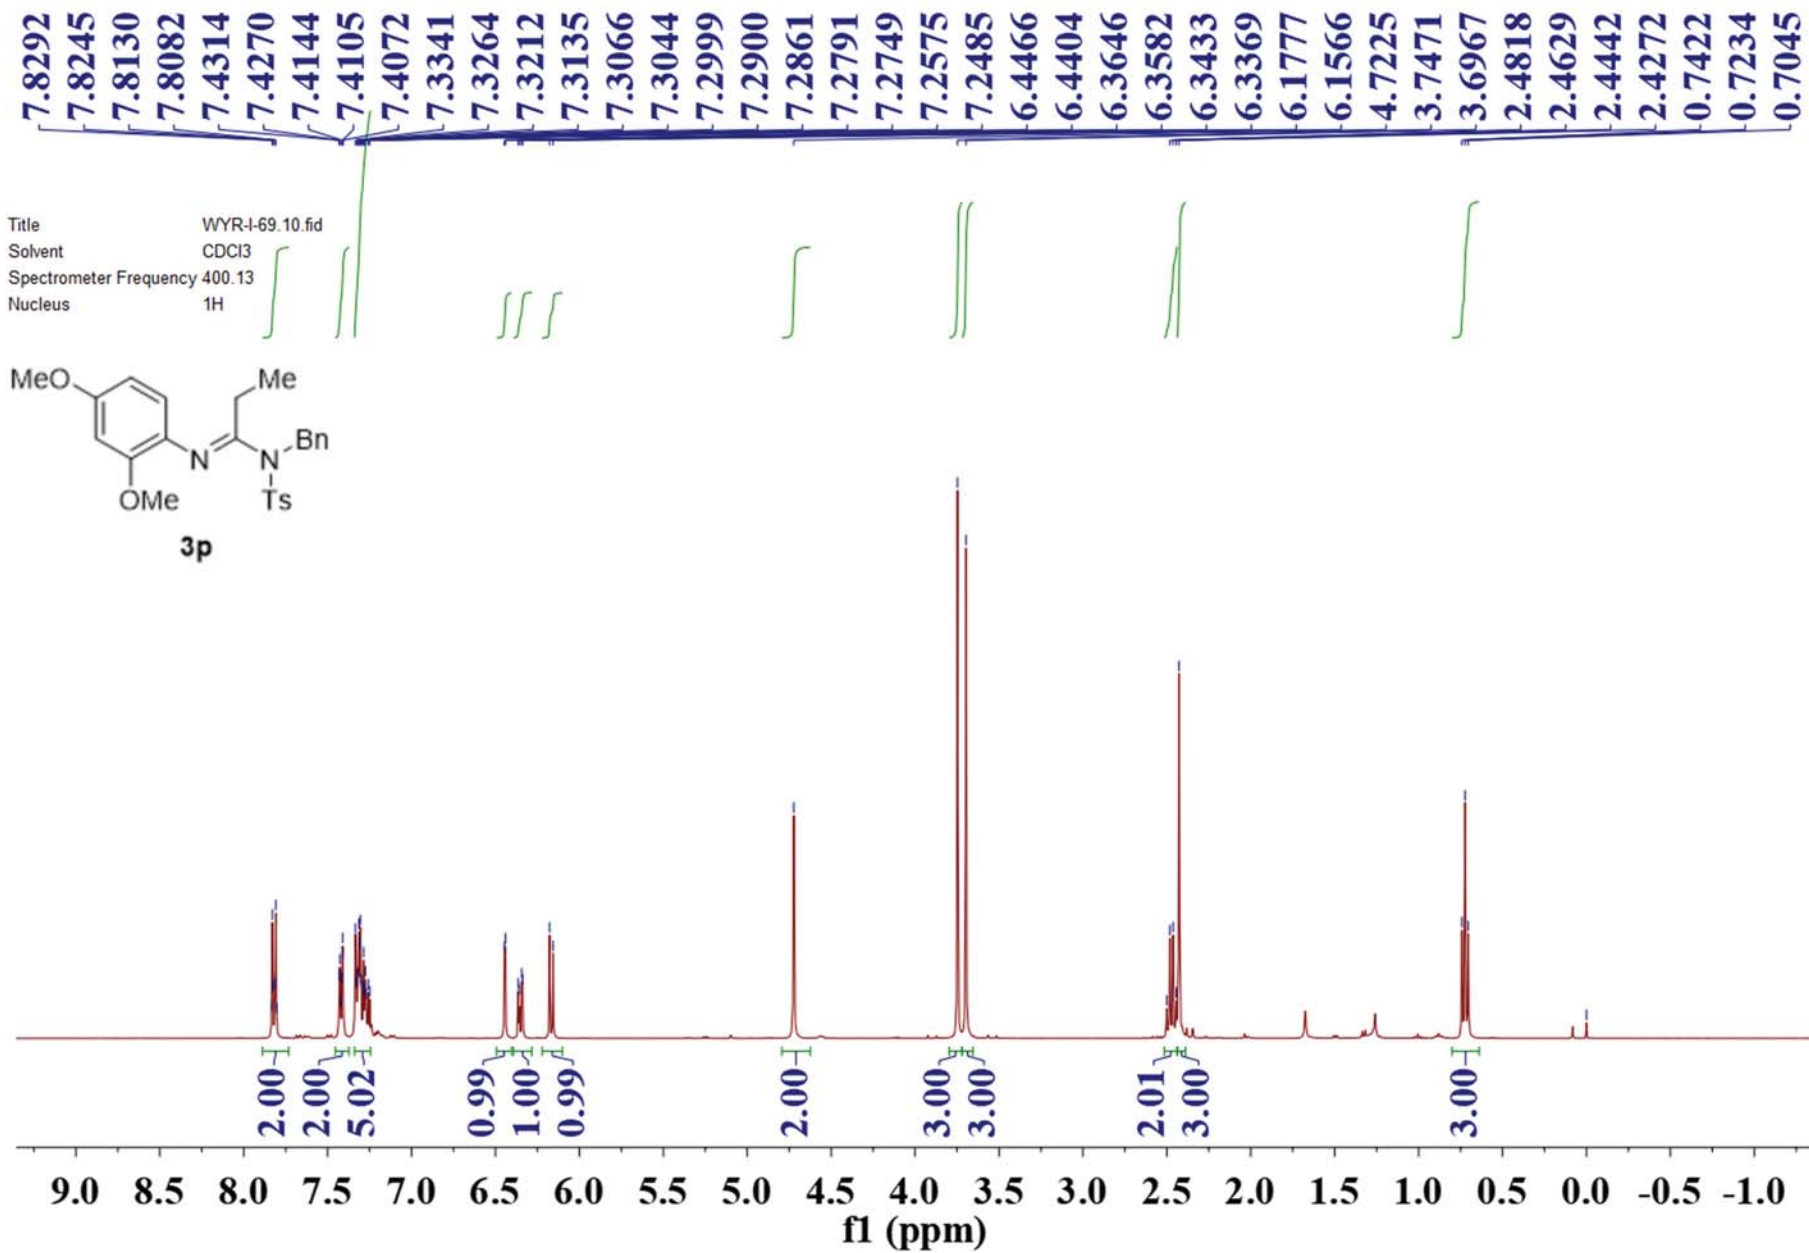

162.588  
 157.091  
 149.502  
 143.986  
 136.805  
 135.682  
 131.023  
 129.672  
 128.111  
 127.958  
 127.568  
 120.611  
 -104.228  
 -99.468  
 77.518  
 77.200  
 76.882  
 55.610  
 55.445  
 51.296  
 -26.753  
 -21.747  
 -10.934

Title WYR-I-6910.fid  
 Solvent CDCl3  
 Spectrometer Frequency 100.62  
 Nucleus 13C

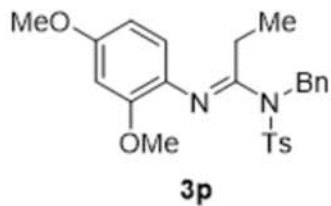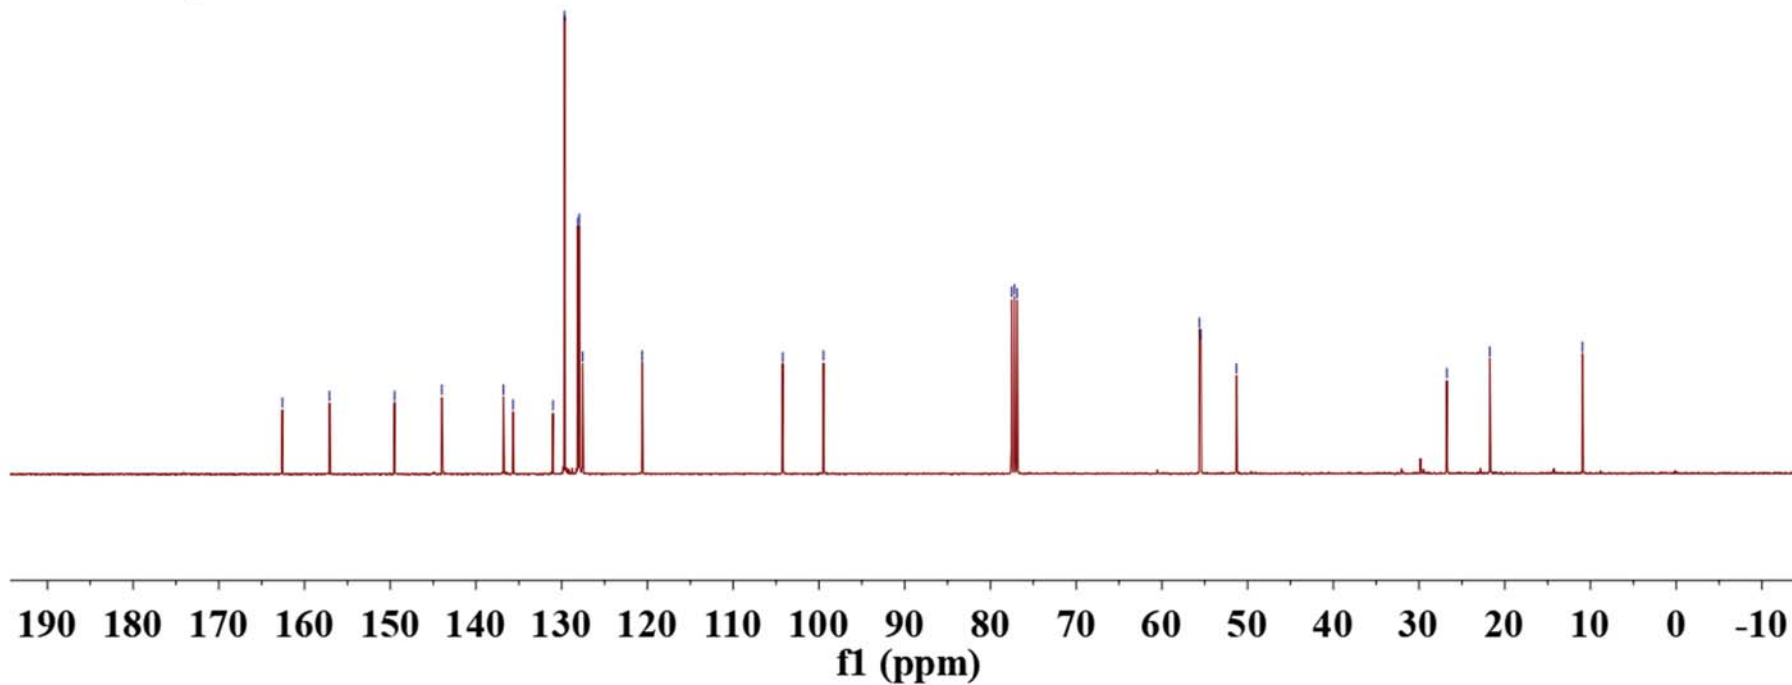

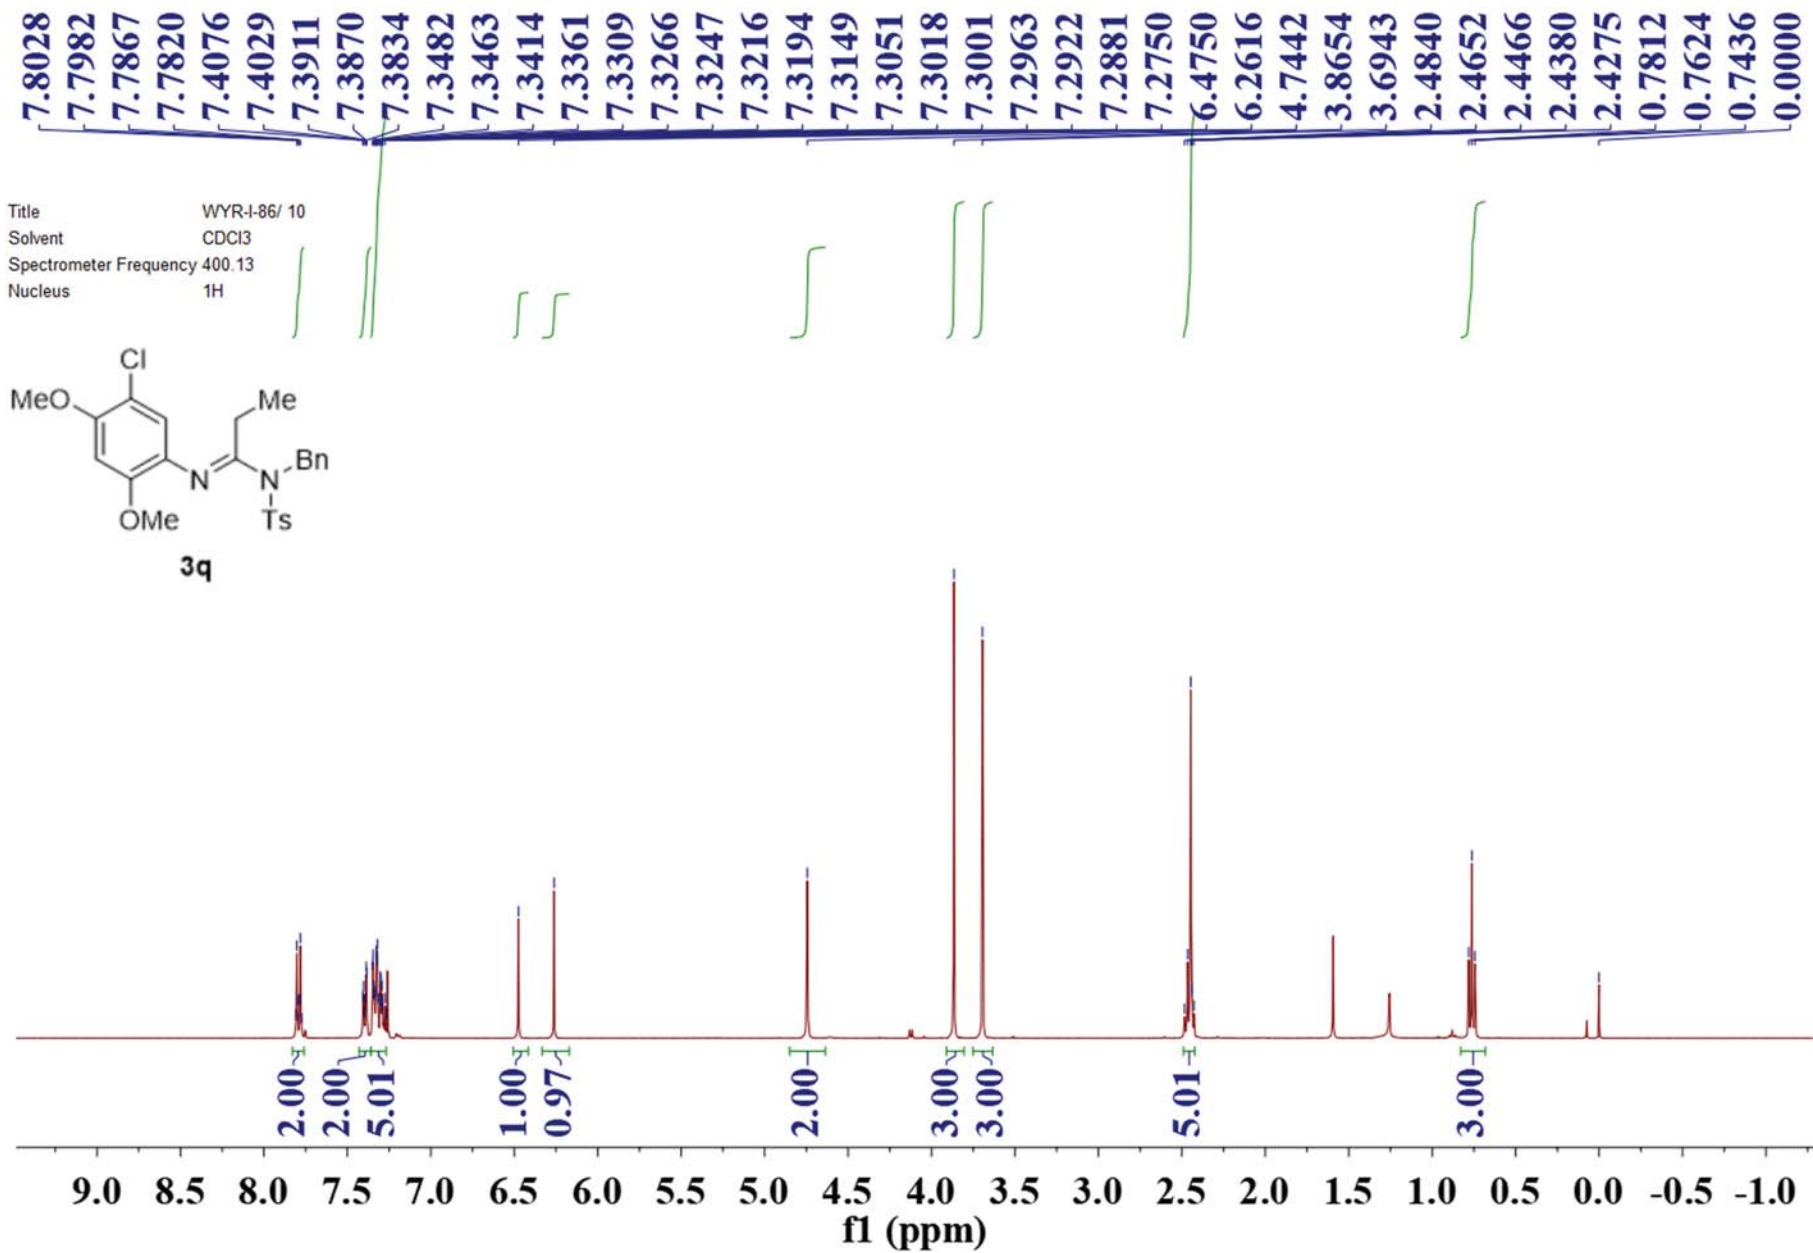

163.134  
 151.806  
 147.963  
 144.172  
 136.721  
 135.814  
 131.322  
 129.759  
 129.451  
 128.233  
 127.917  
 127.700  
 121.775  
 113.776  
 -98.028  
 77.518  
 77.200  
 76.882  
 56.860  
 55.941  
 51.266  
 -26.721  
 -21.797  
 -11.025

Title WYR-I-86.10.fid  
 Solvent CDCl3  
 Spectrometer Frequency 100.62  
 Nucleus 13C

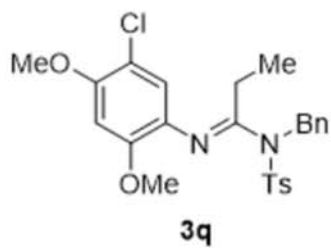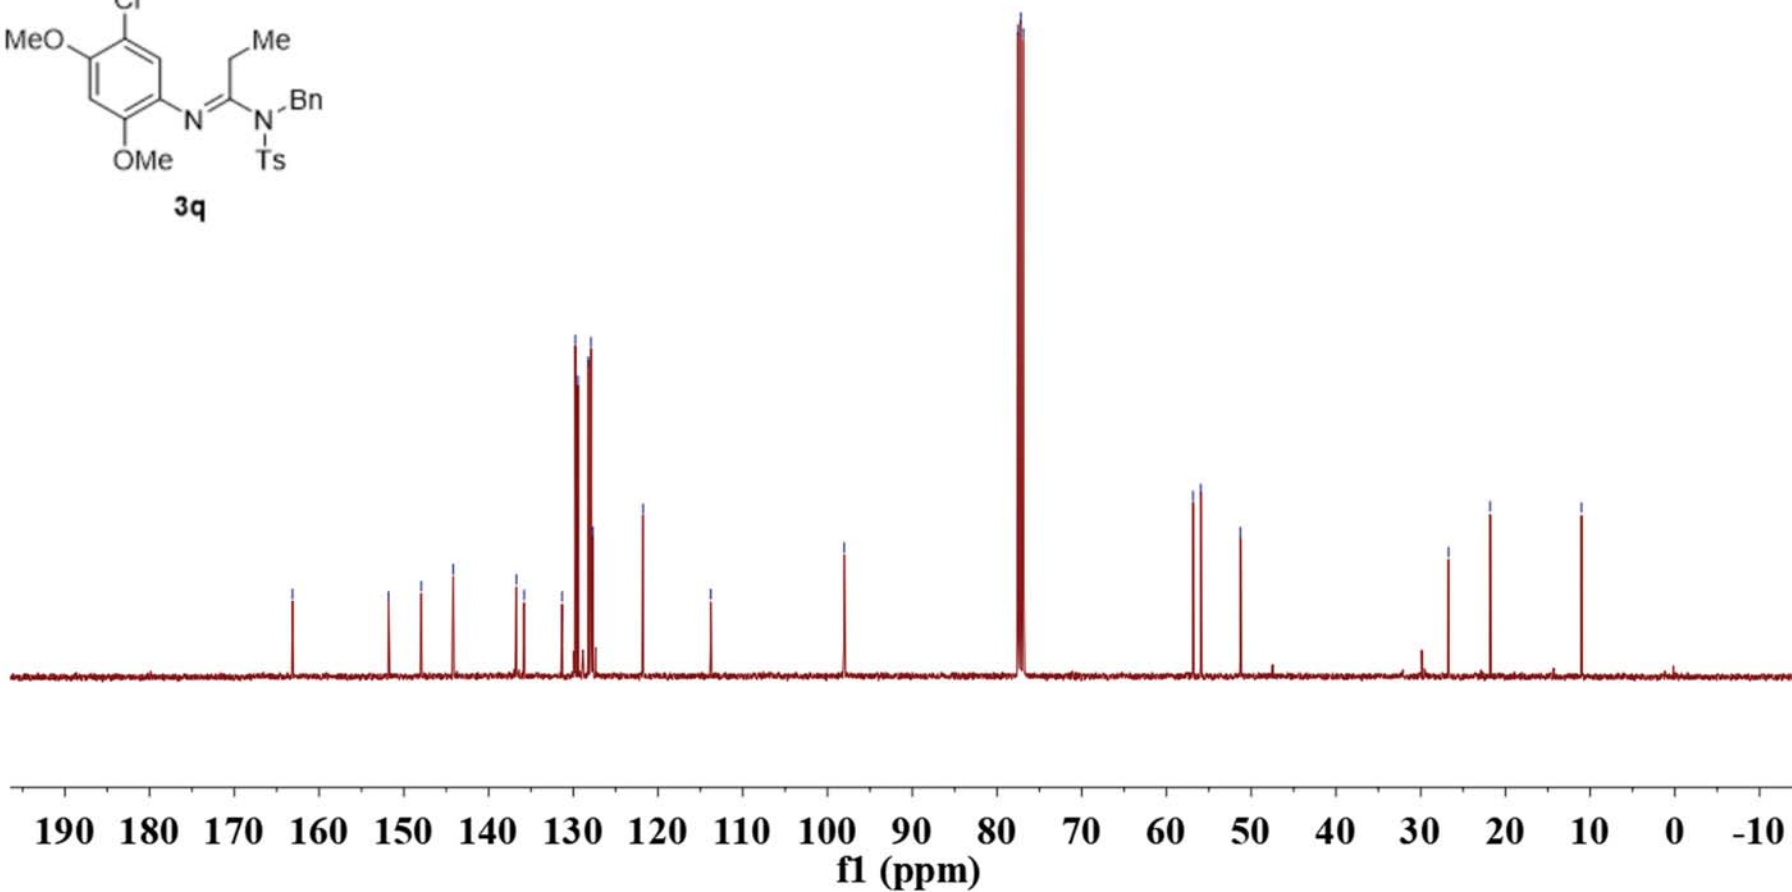

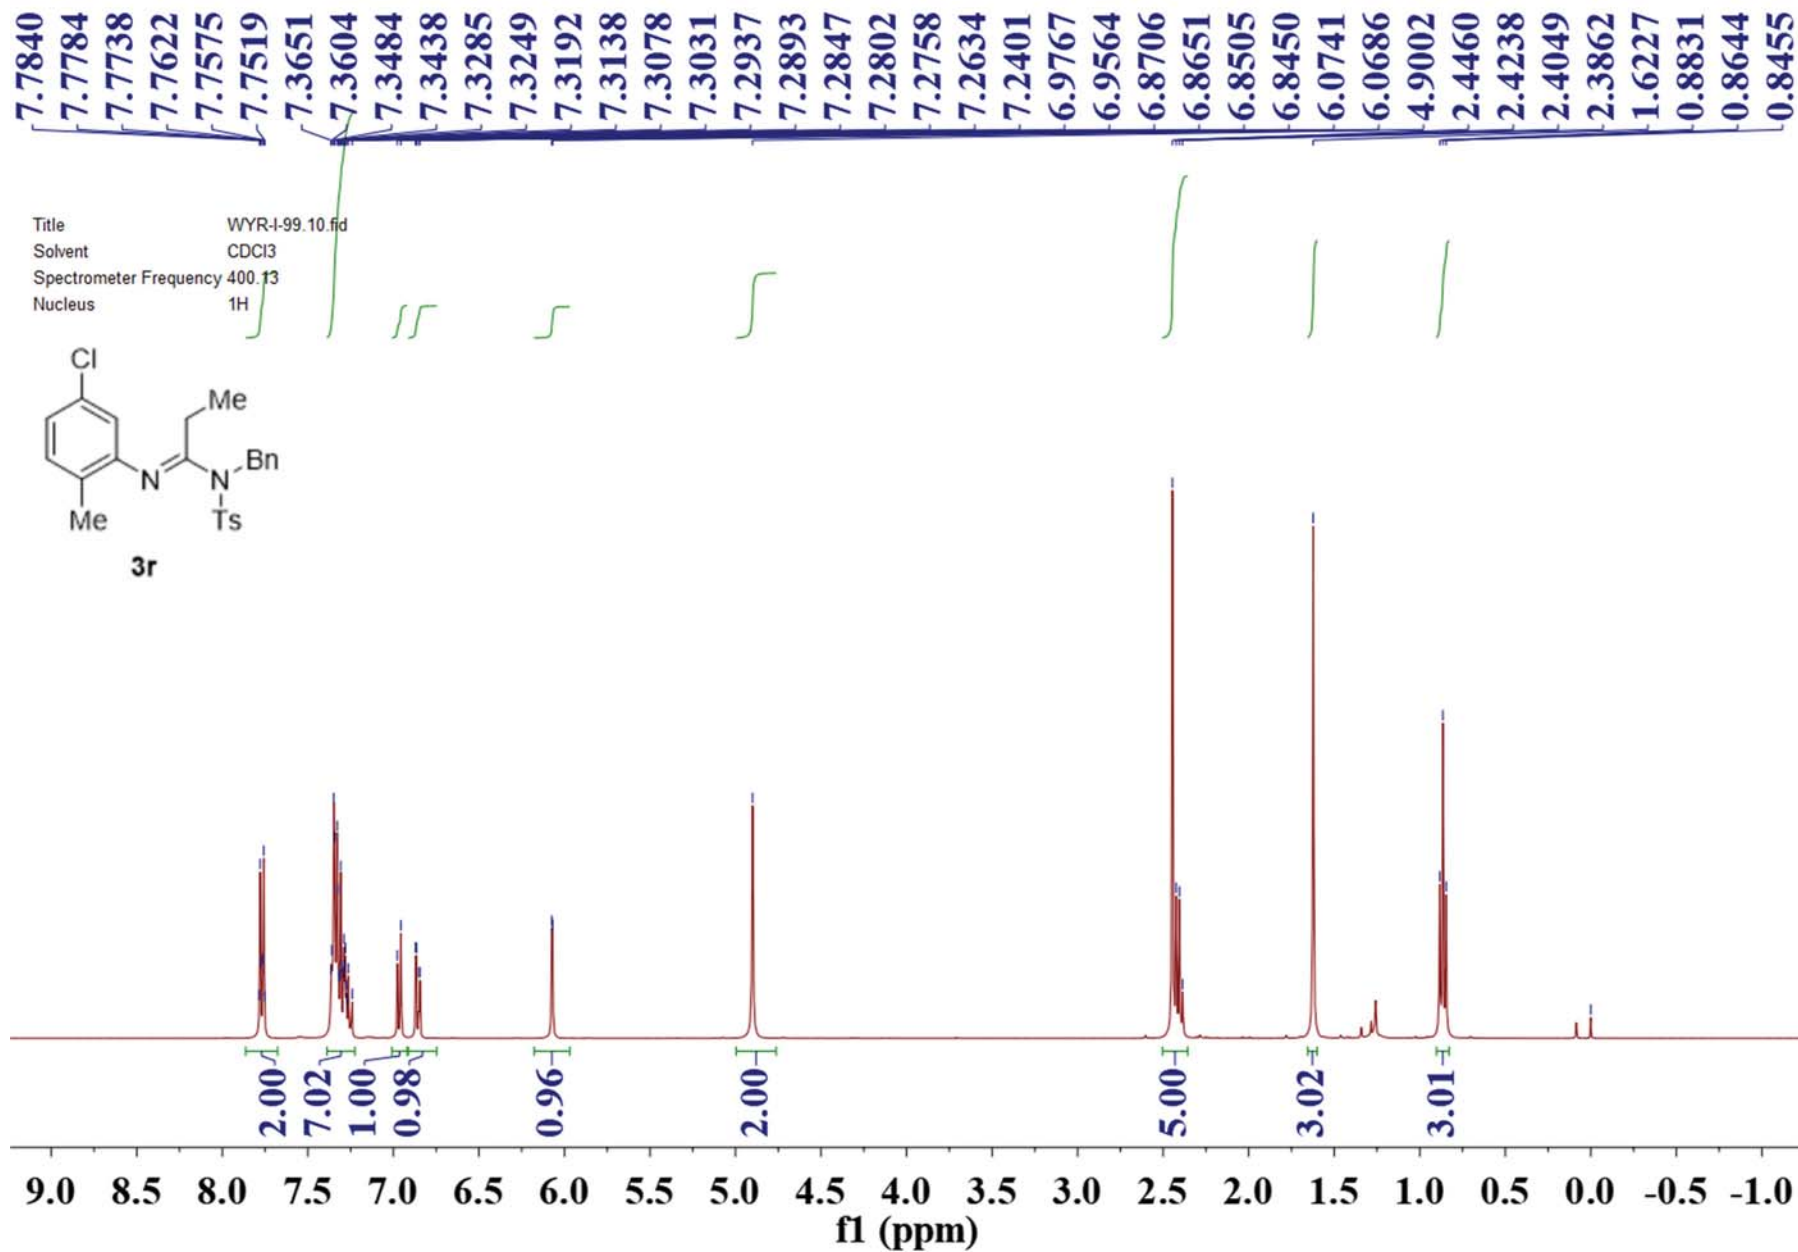



160.091  
 148.223  
 144.440  
 136.929  
 136.404  
 131.588  
 131.488  
 129.937  
 128.671  
 128.490  
 127.758  
 127.740  
 125.856  
 123.255  
 118.659  
 77.518  
 77.200  
 76.882  
 -51.239  
 ~25.832  
 ~21.789  
 ~17.196  
 ~11.310

Title WYR-I-99.11.fid  
 Solvent CDCl3  
 Spectrometer Frequency 100.62  
 Nucleus 13C

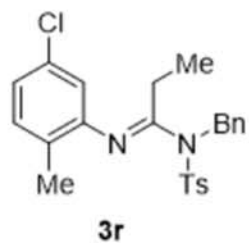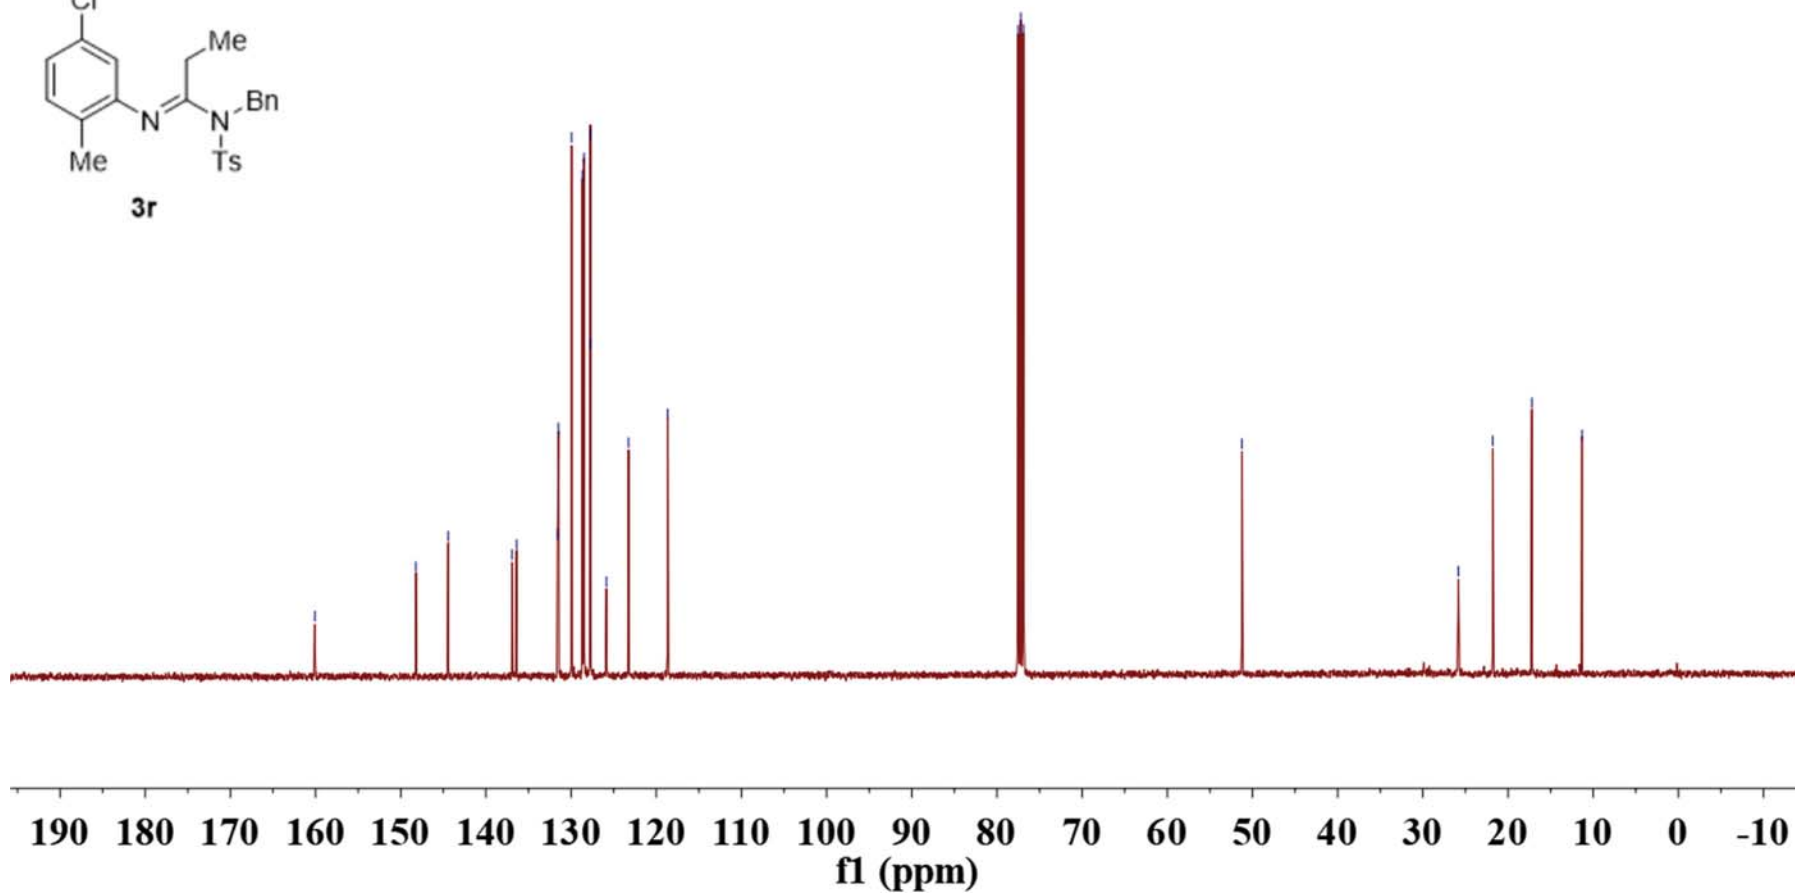

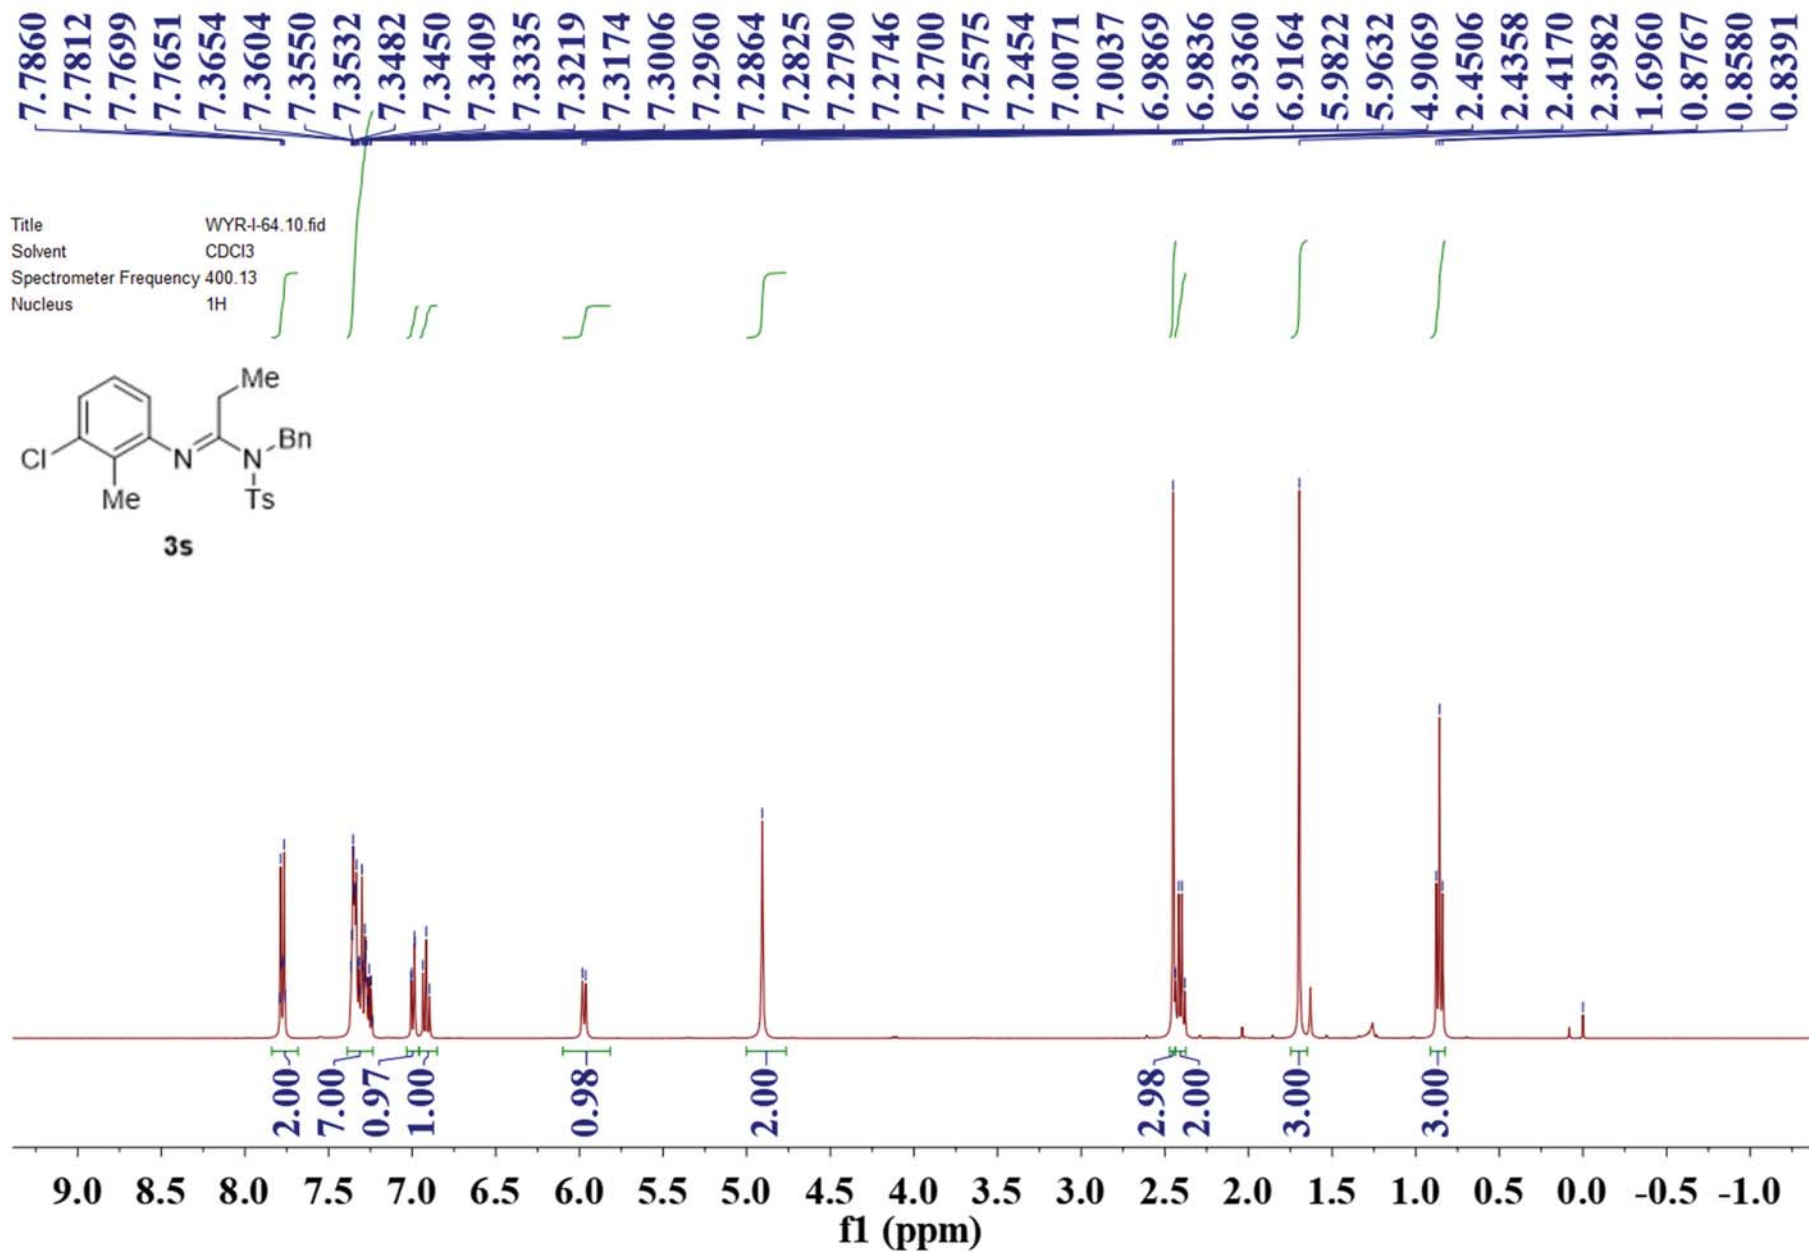

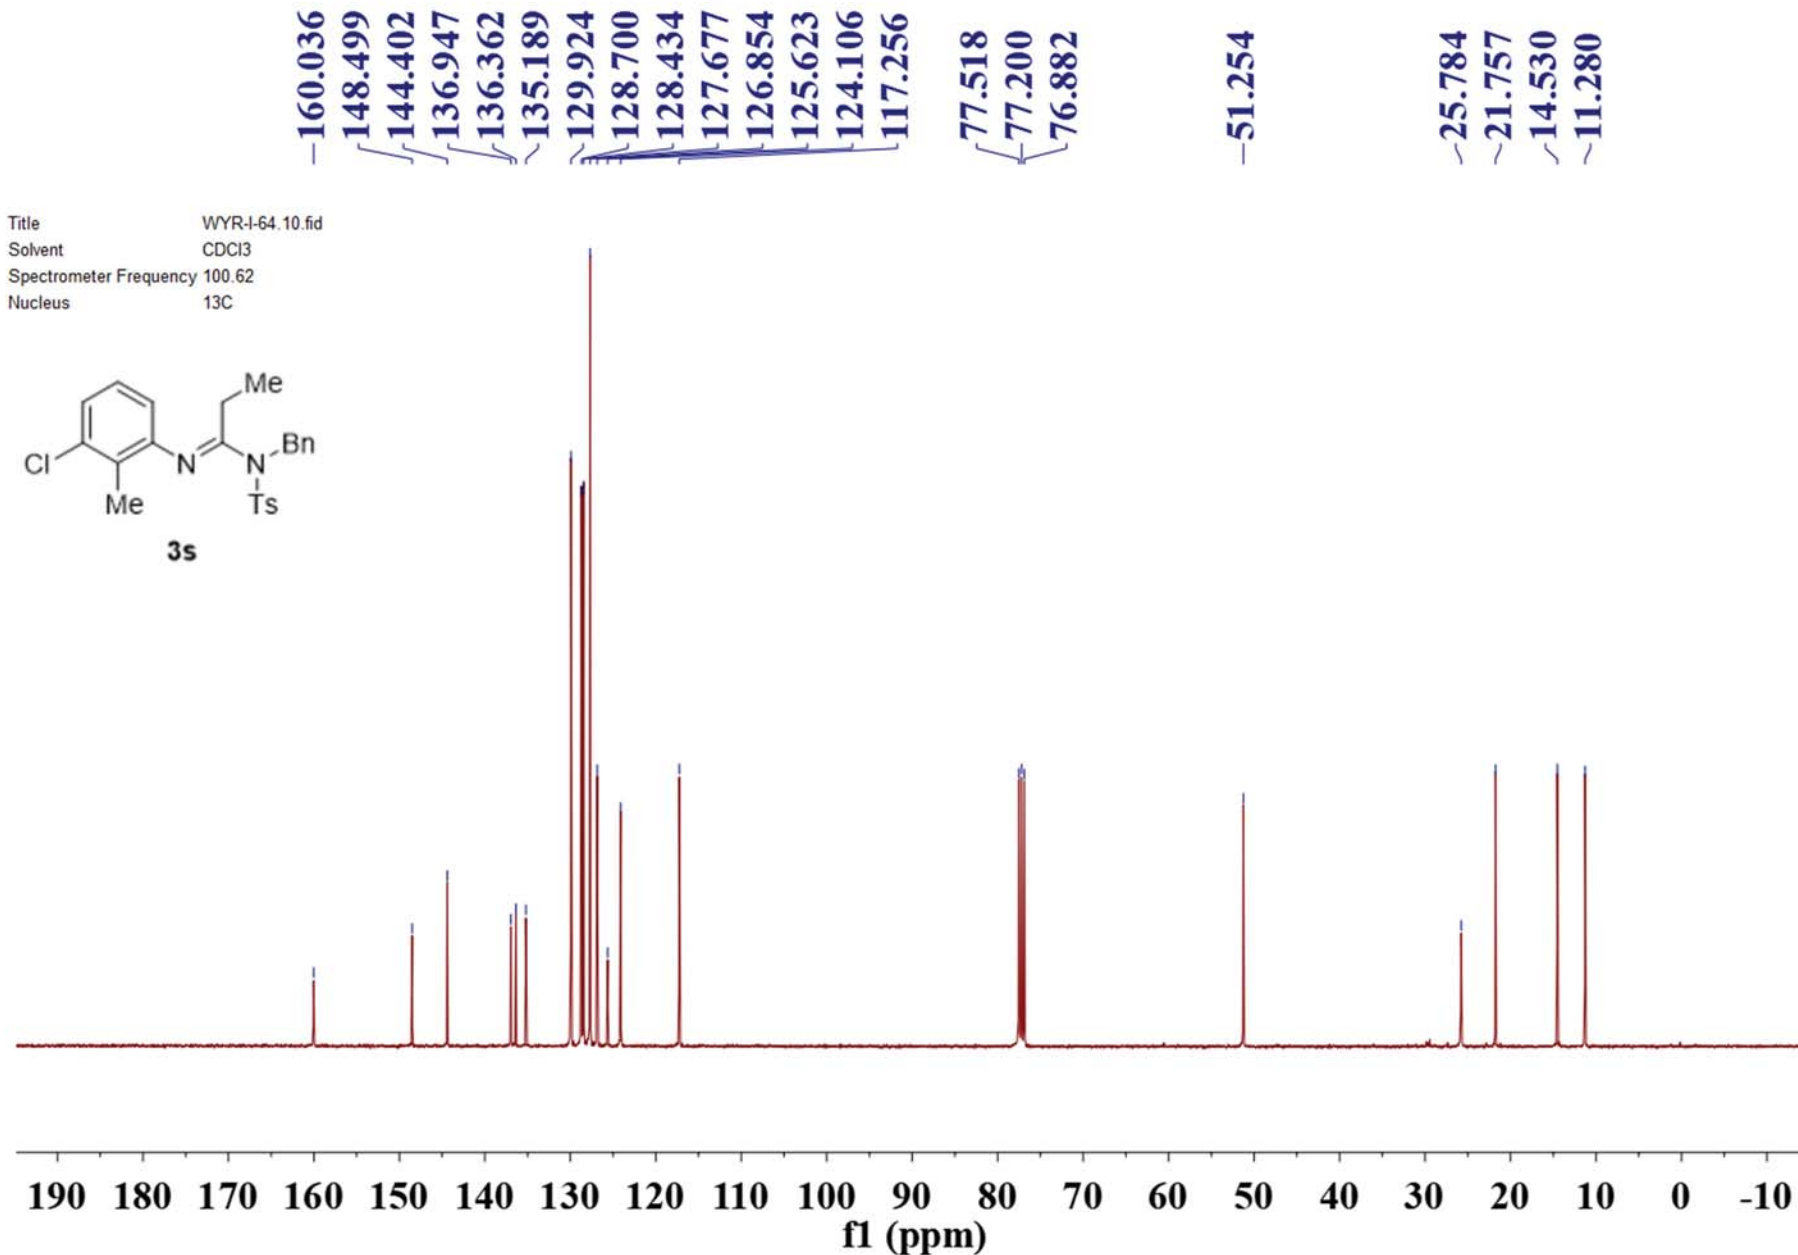

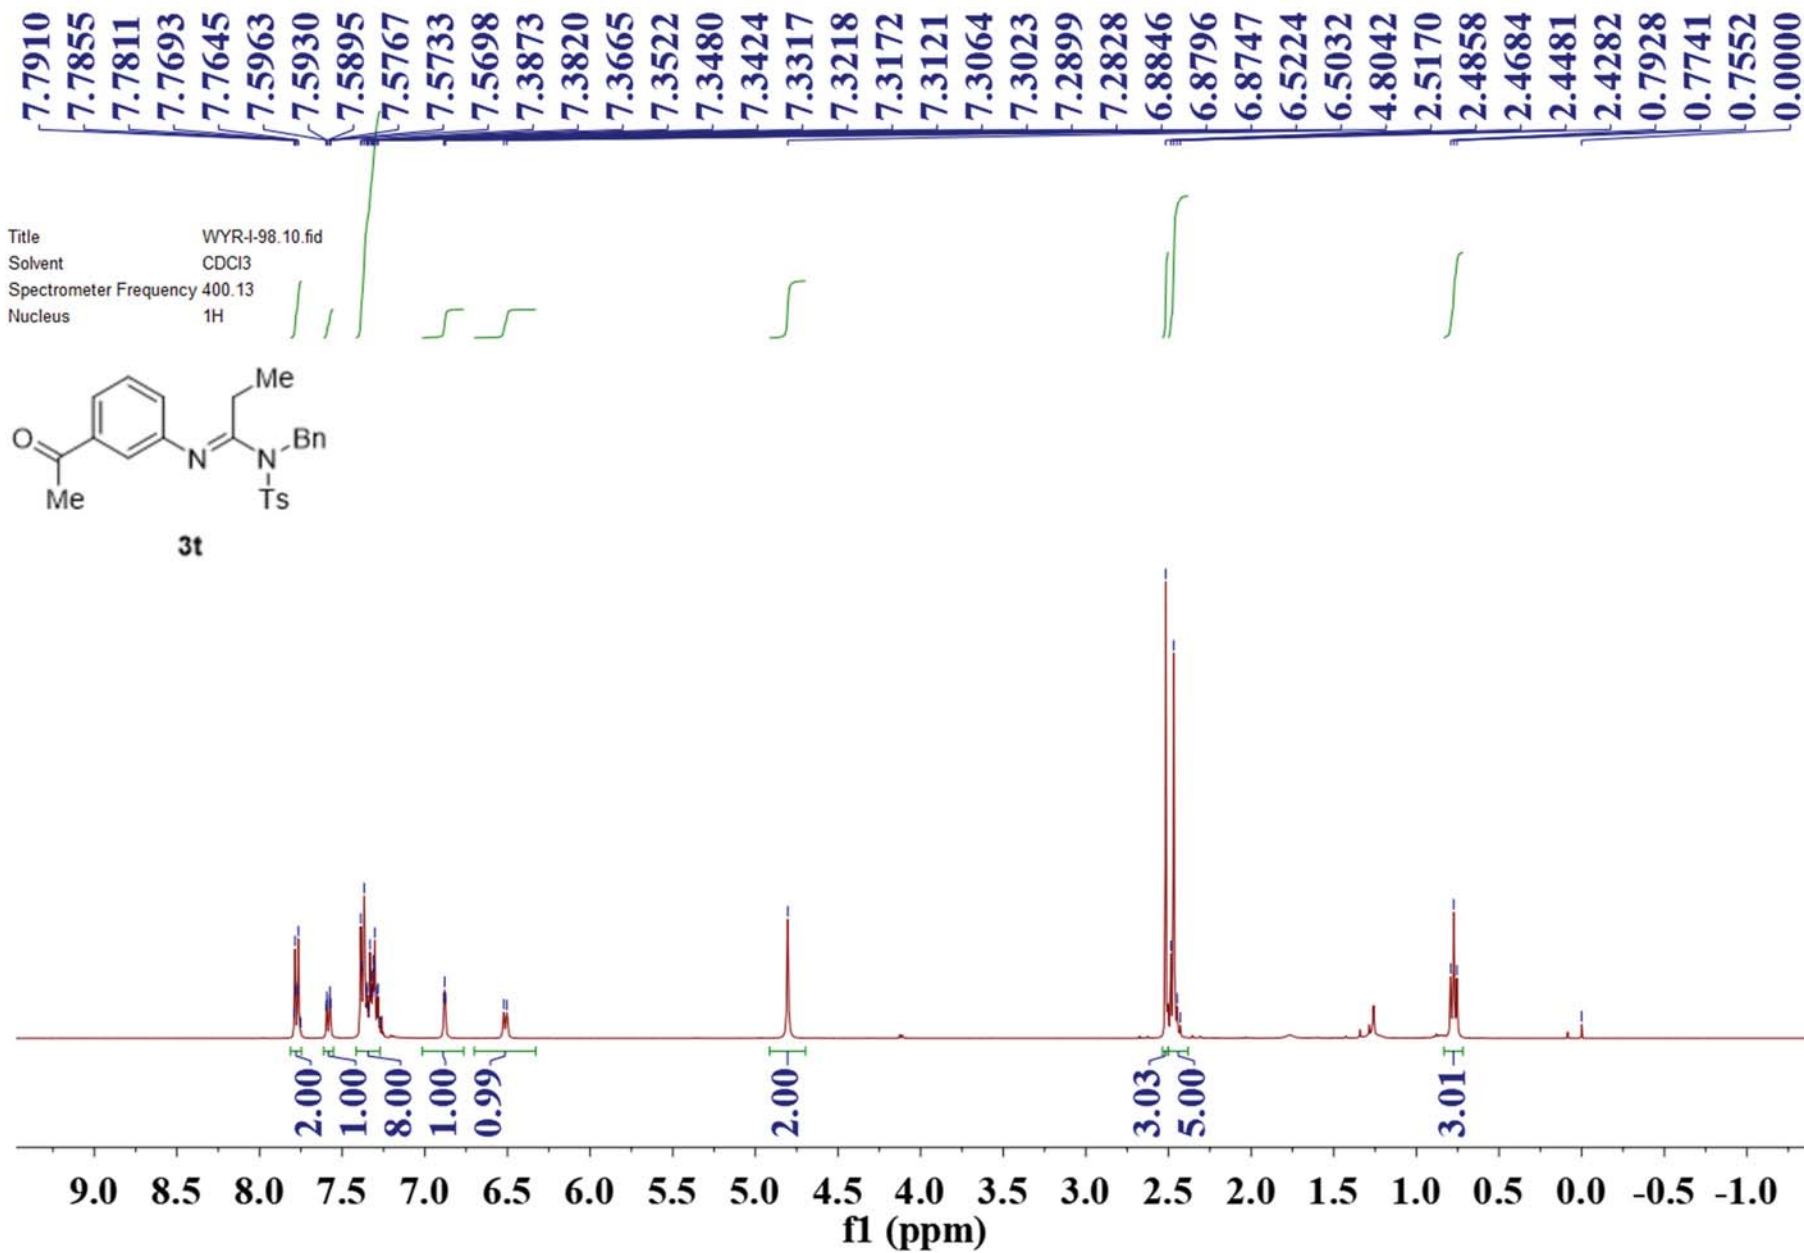

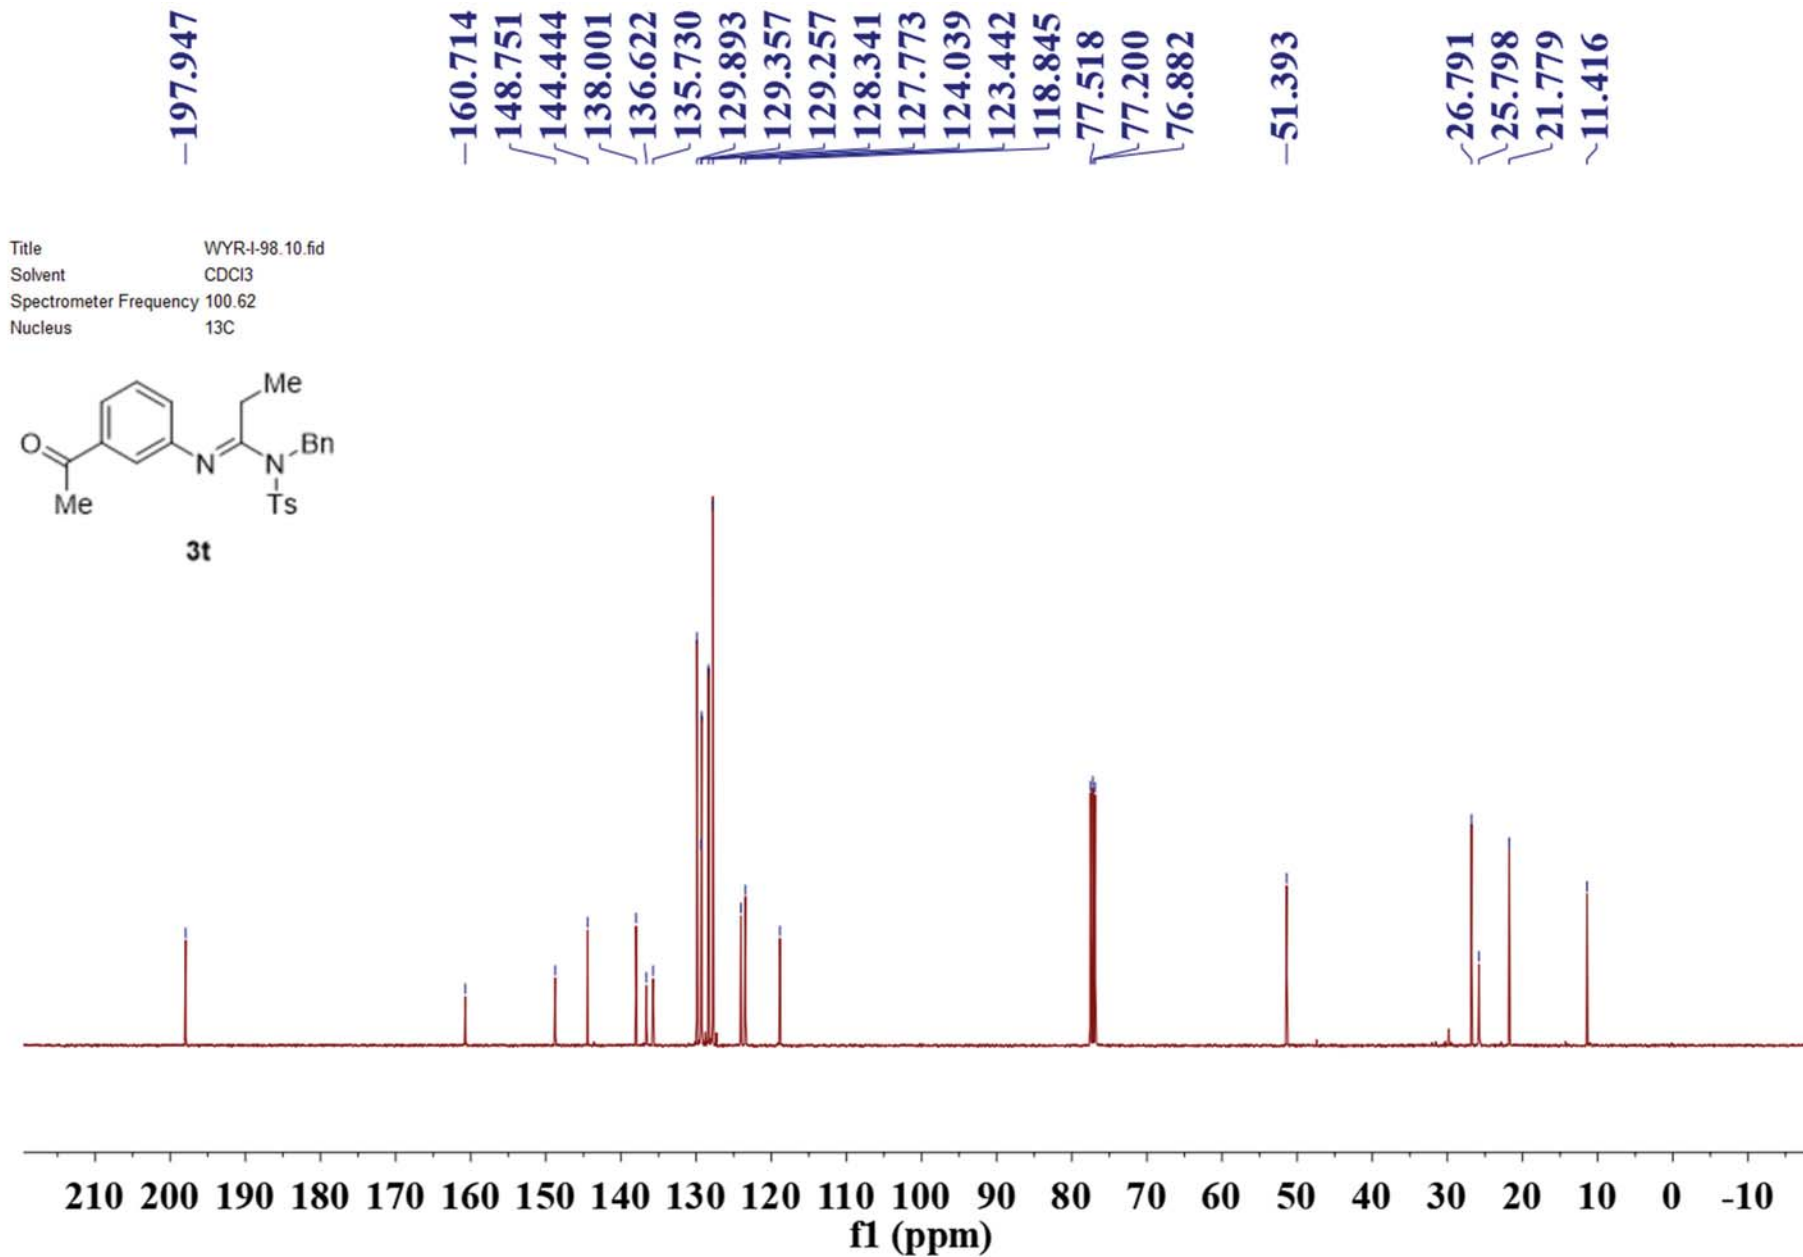

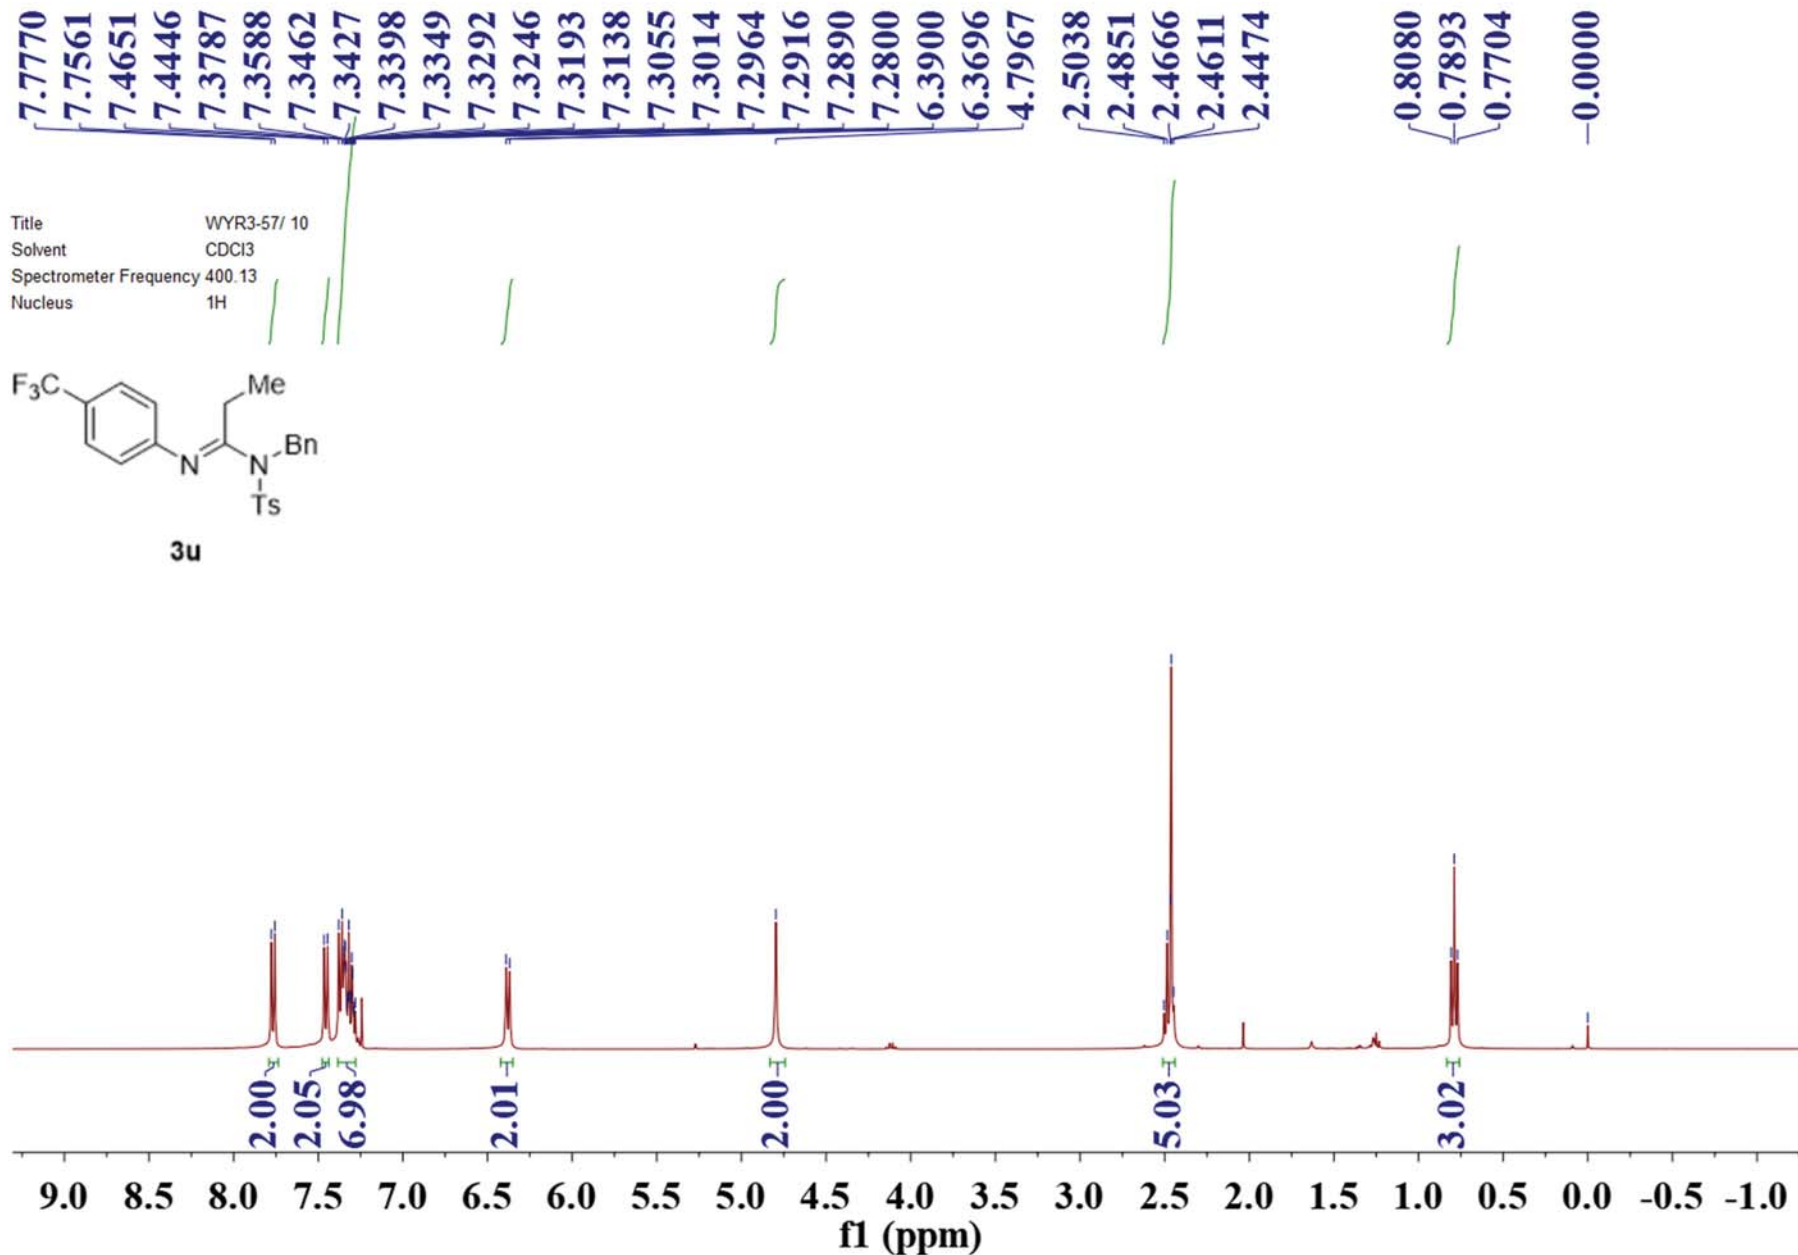

160.392  
151.524  
144.515  
136.562  
135.766  
129.917  
129.202  
128.504  
128.379  
127.815  
127.756  
126.421  
126.384  
126.346  
126.308  
125.913  
125.807  
125.590  
125.266  
124.942  
123.110  
120.413  
119.383  
77.518  
77.200  
76.882  
-51.394

25.947  
21.774  
11.505

Title WYR3-57.10.fid  
Solvent CDCl3  
Spectrometer Frequency 100.62  
Nucleus 13C

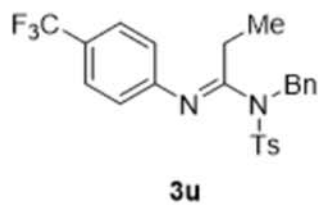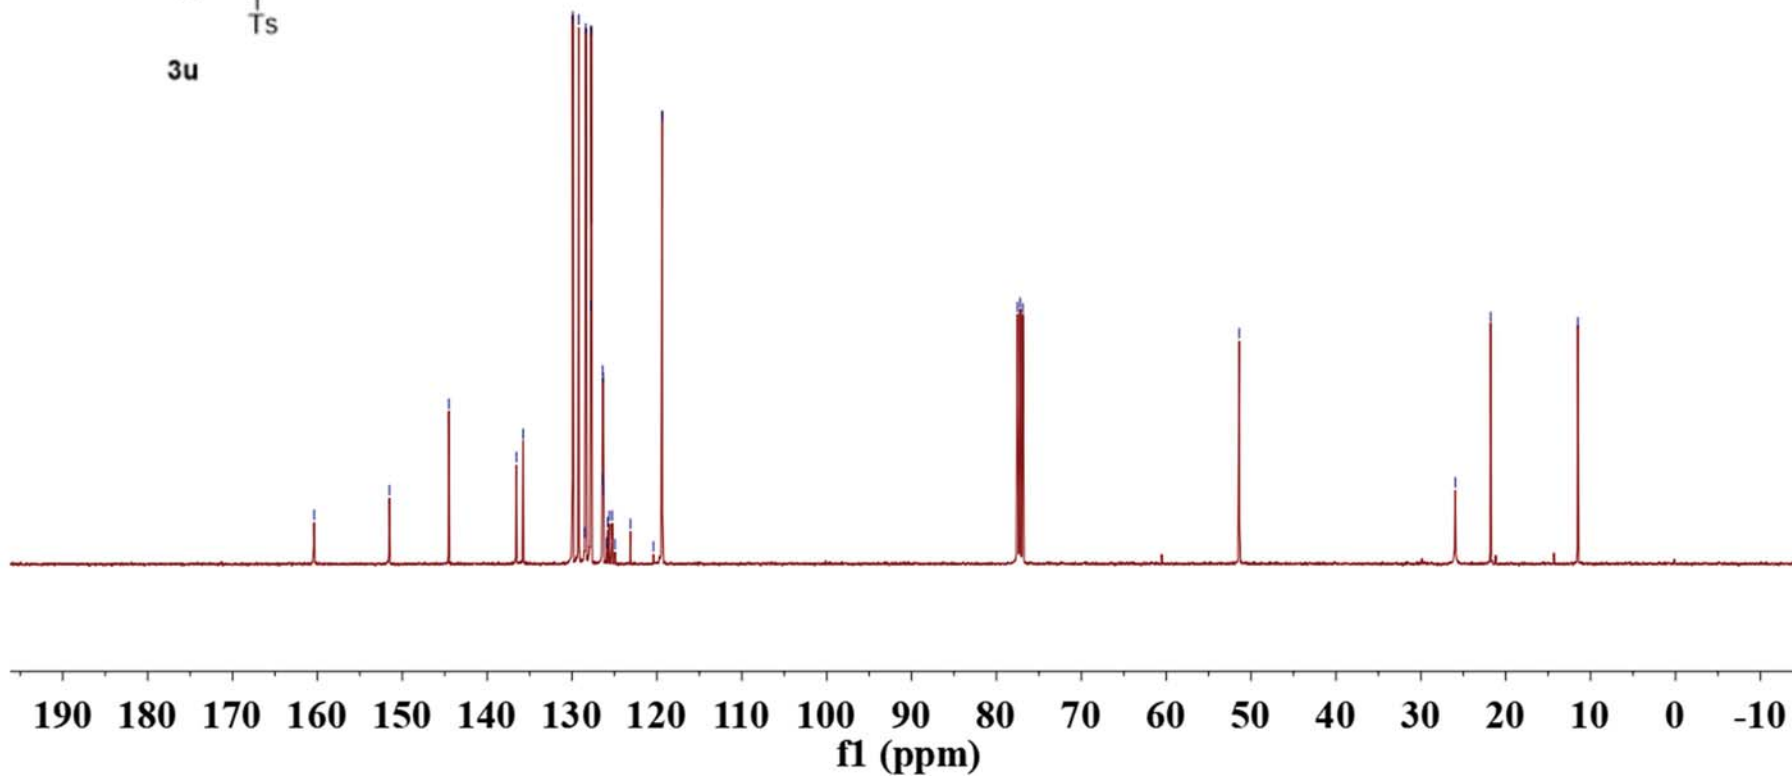

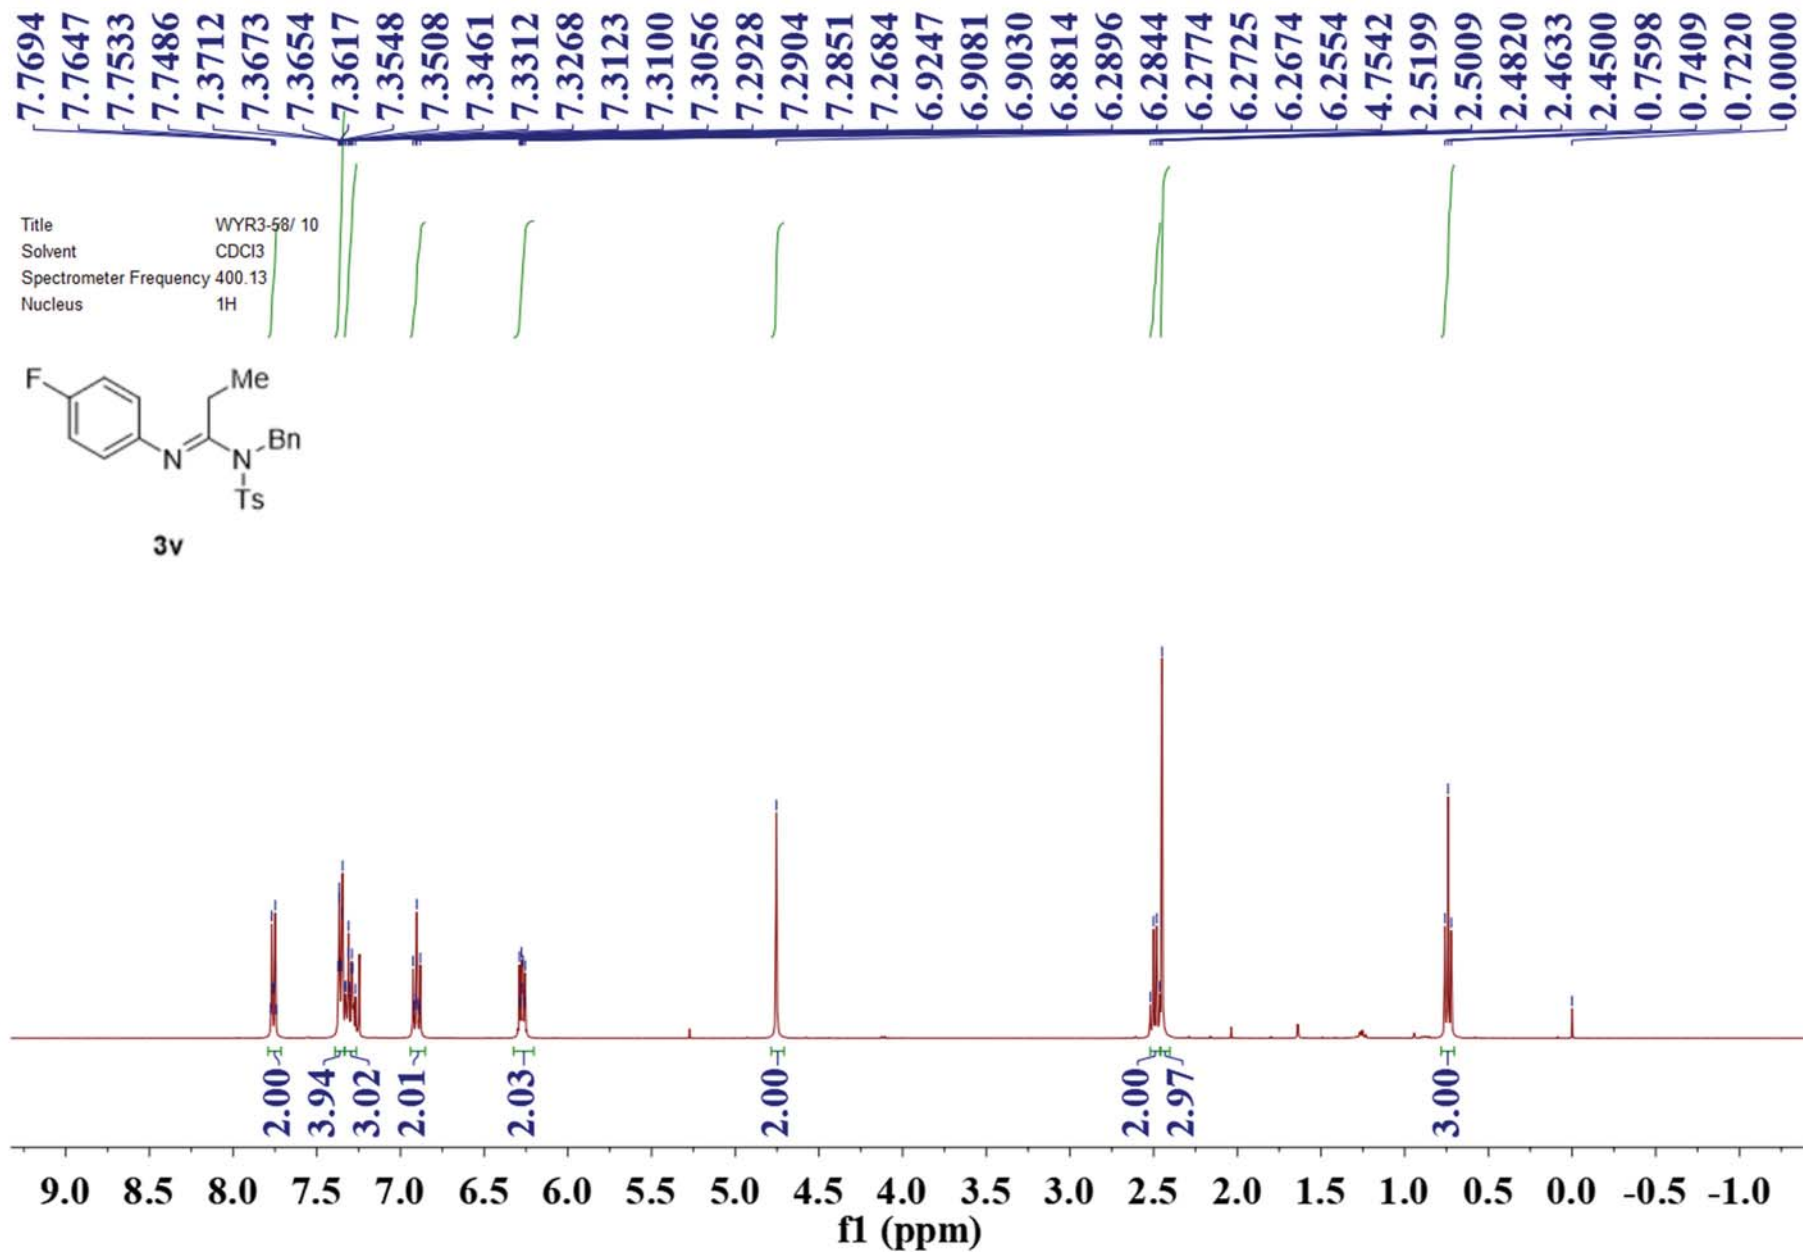



161.122  
 160.538  
 158.139  
 144.514  
 144.486  
 144.326  
 136.606  
 135.627  
 129.843  
 129.383  
 128.300  
 127.771  
 127.753  
 120.426  
 120.348  
 115.899  
 115.675  
 77.518  
 77.200  
 76.882  
 -51.398  
 25.802  
 21.770  
 11.305

Title WYR3-58.10.fid  
 Solvent CDCl3  
 Spectrometer Frequency 100.62  
 Nucleus 13C

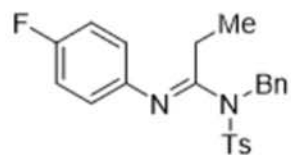

3v

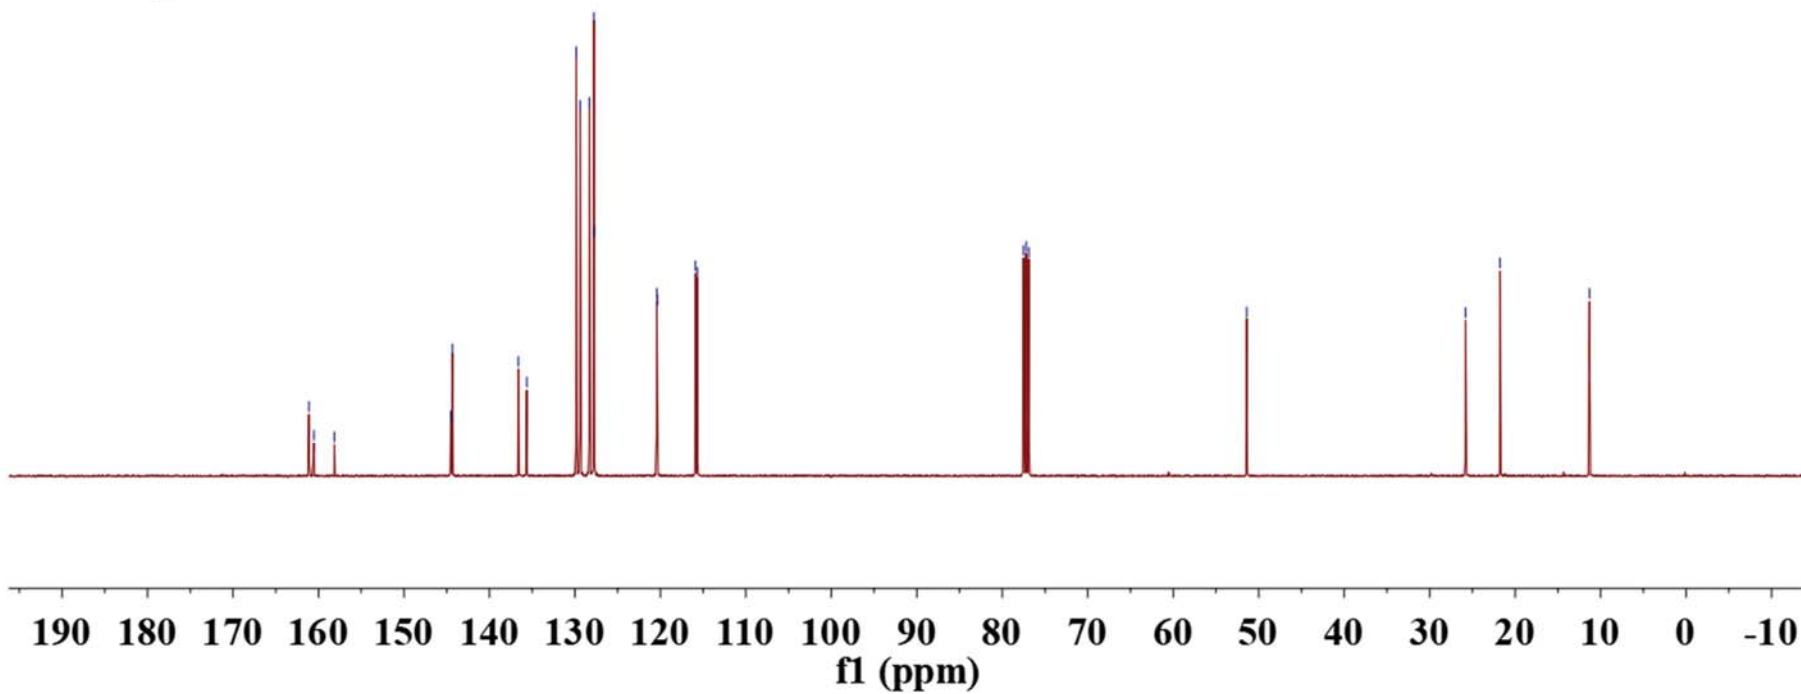

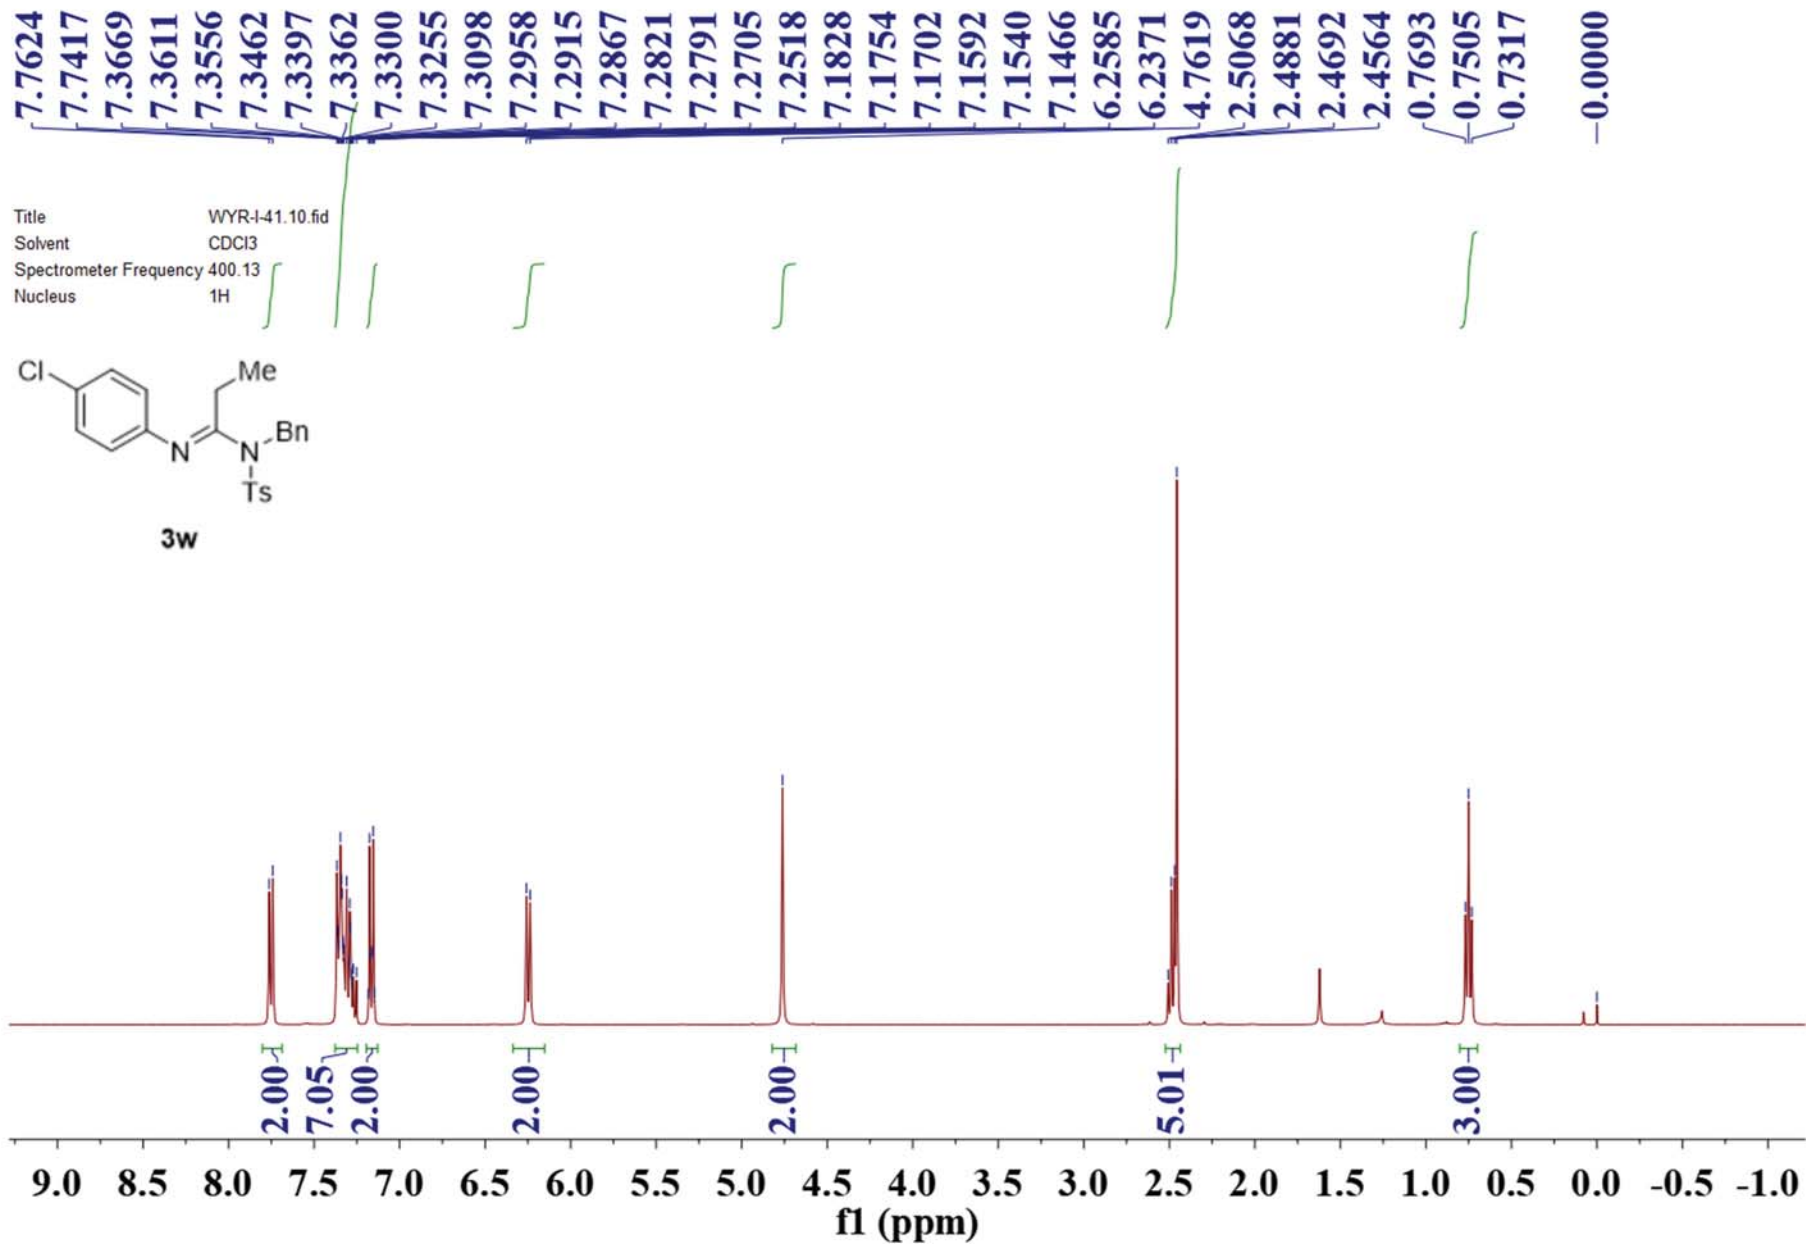

160.823  
 146.986  
 144.372  
 136.598  
 135.726  
 129.864  
 129.302  
 129.149  
 128.657  
 128.330  
 127.767  
 120.563  
  
 77.518  
 77.200  
 76.882  
  
 -51.378  
  
 25.818  
 21.782  
 11.389

Title WYR-I-41.10.fid  
 Solvent CDCl3  
 Spectrometer Frequency 100.62  
 Nucleus 13C

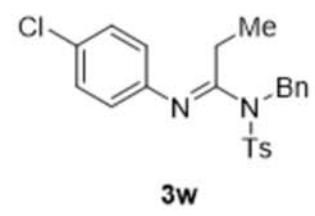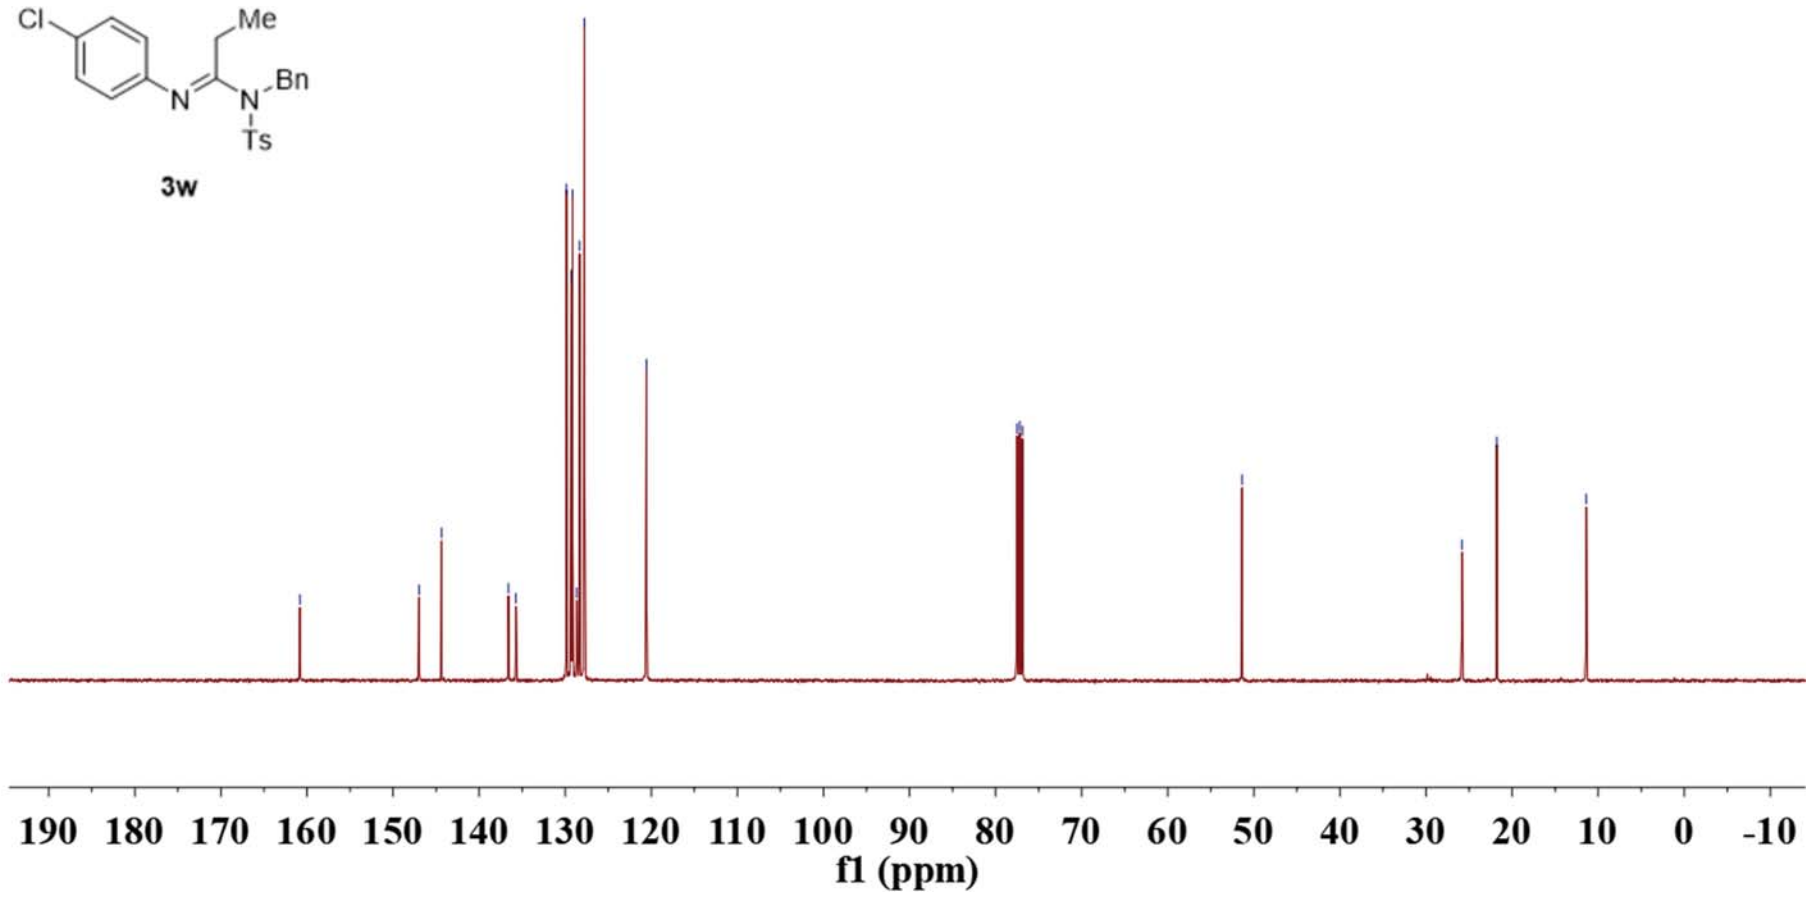

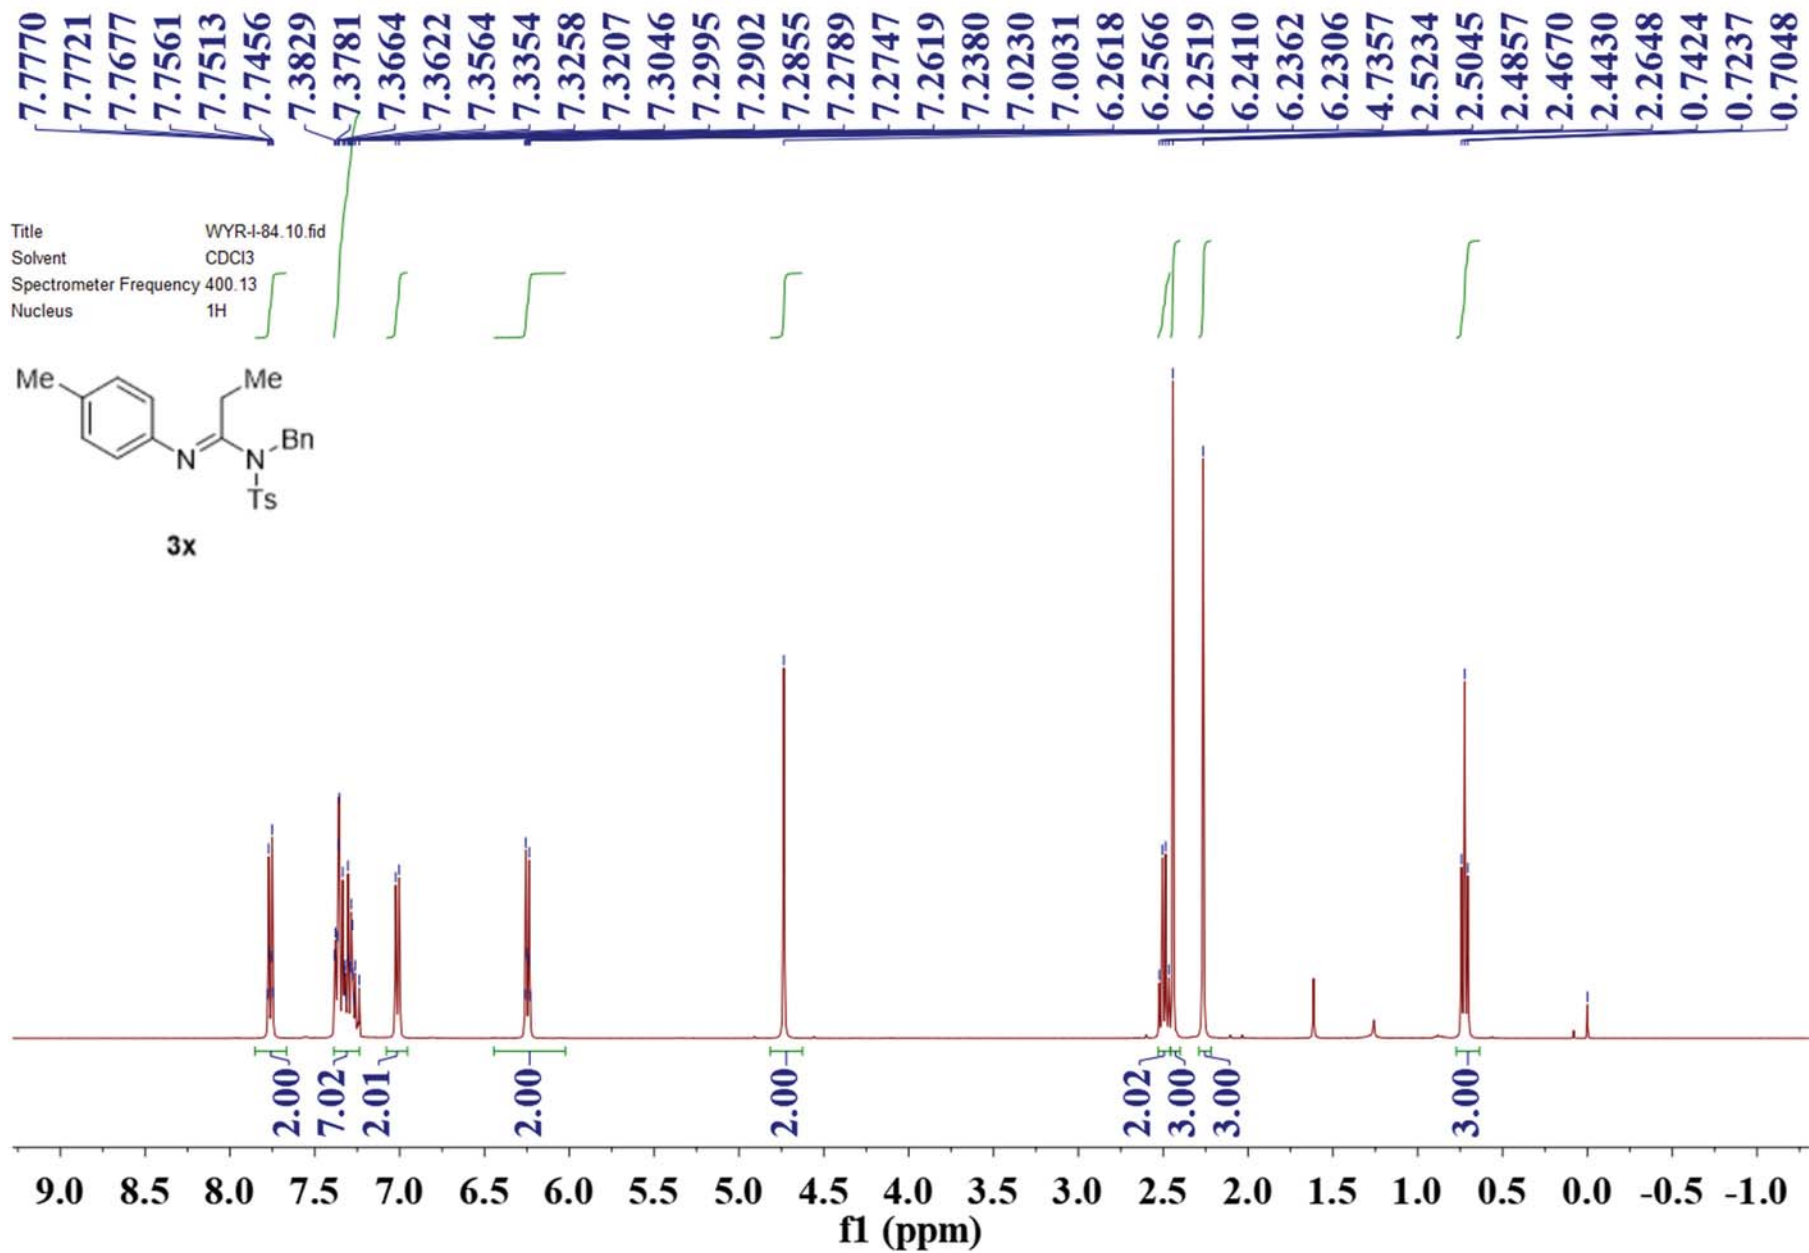

160.514  
 145.932  
 144.179  
 136.675  
 135.644  
 132.812  
 129.798  
 129.641  
 129.572  
 128.258  
 127.828  
 127.703  
 119.005  
 77.518  
 77.200  
 76.882  
 51.425  
 25.924  
 21.771  
 20.915  
 11.328

Title WYR-I-84.10.fid  
 Solvent CDCl3  
 Spectrometer Frequency 100.62  
 Nucleus 13C

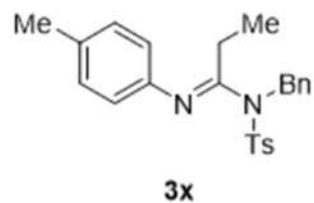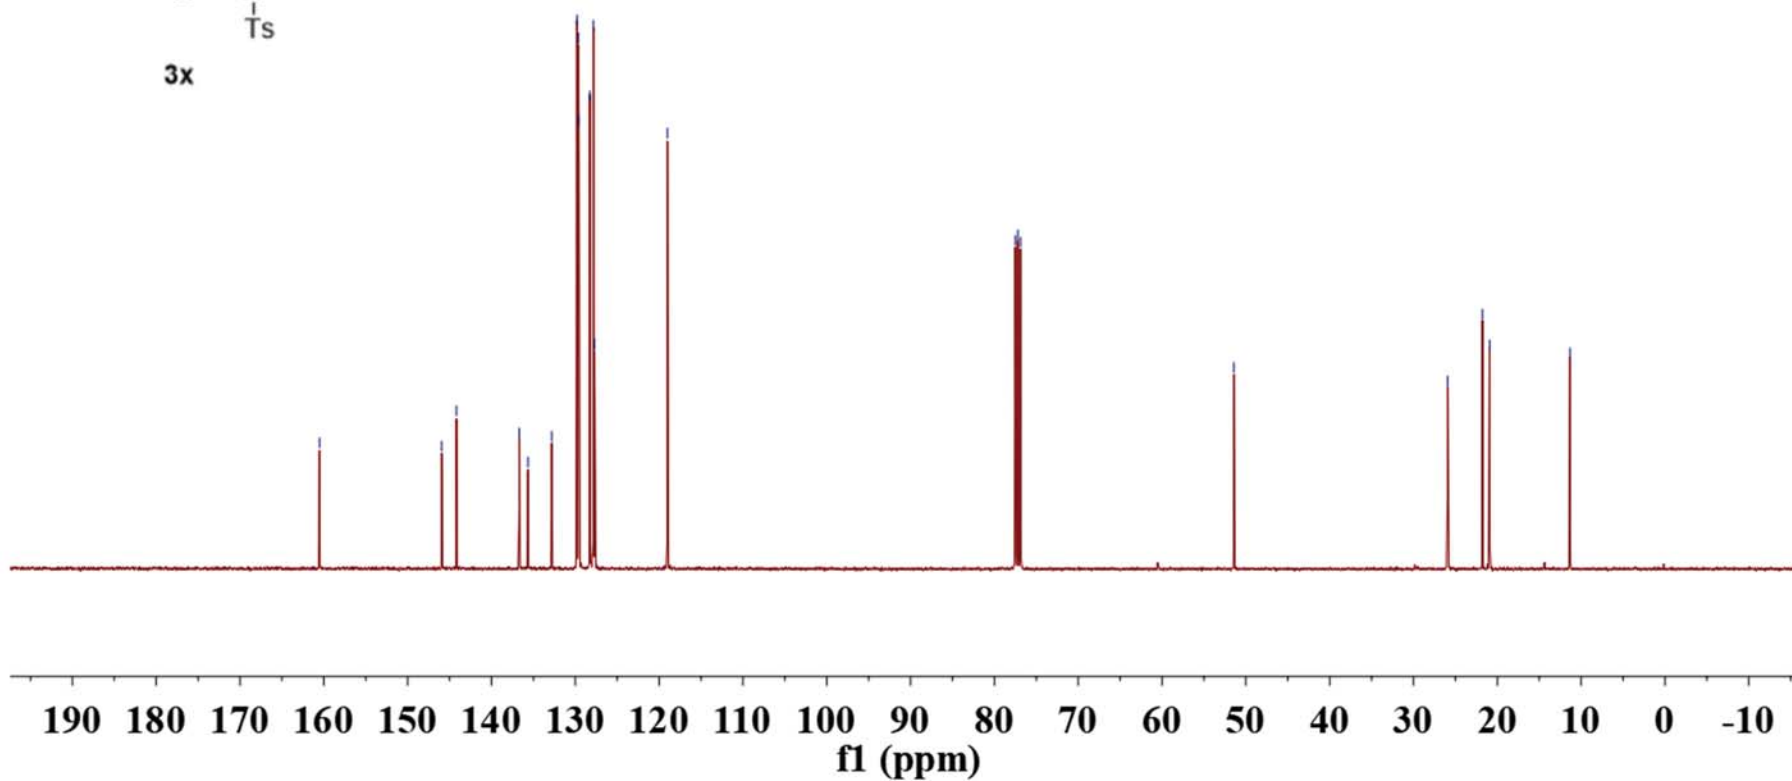

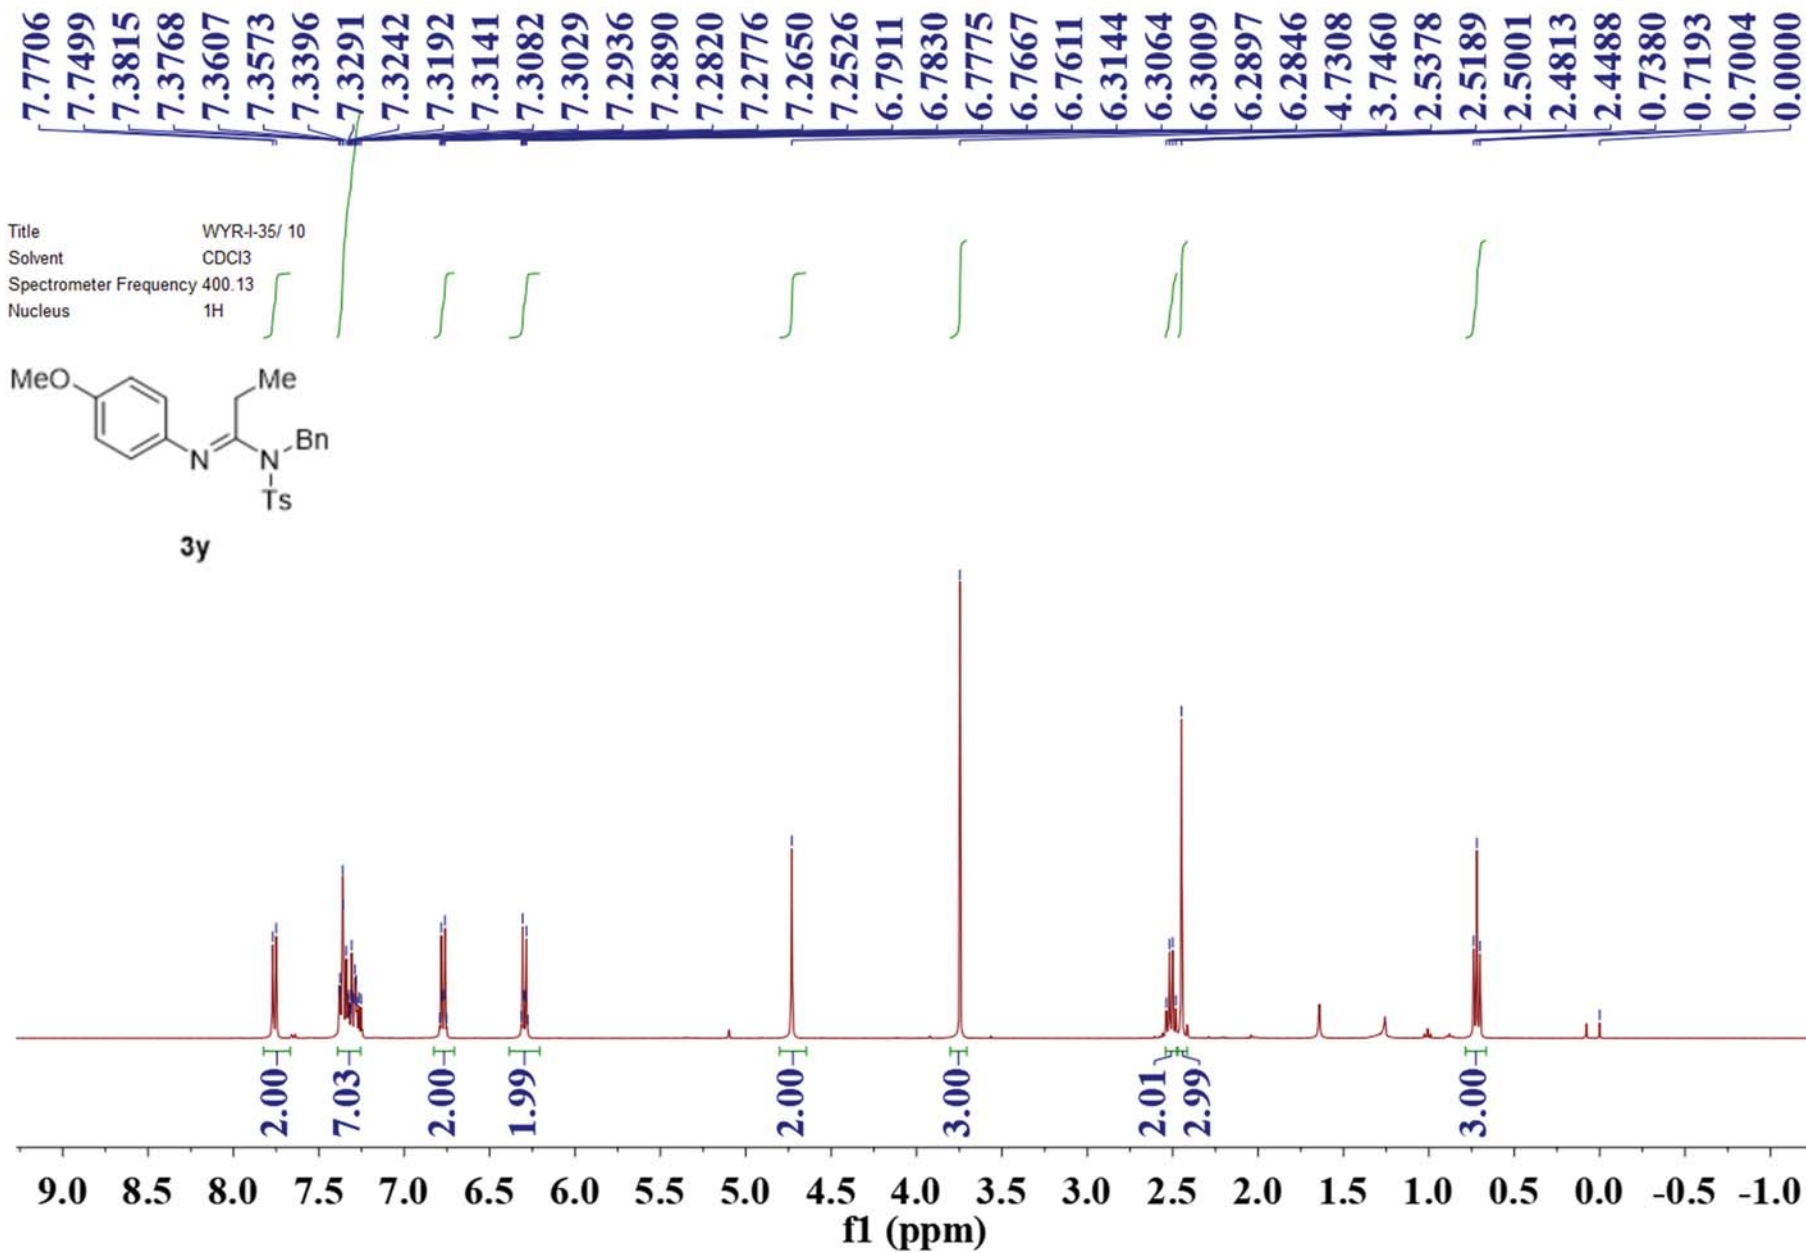

161.005  
 156.041  
 144.200  
 141.750  
 136.692  
 135.634  
 129.811  
 129.583  
 128.278  
 127.853  
 127.726  
 120.224  
 114.422  
 77.518  
 77.200  
 76.882  
 ~55.590  
 ~51.469  
 ~25.923  
 ~21.791  
 ~11.264

Title WYR-I-35.10.fid  
 Solvent CDCl3  
 Spectrometer Frequency 100.62  
 Nucleus 13C

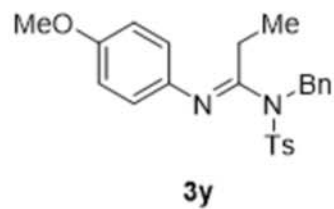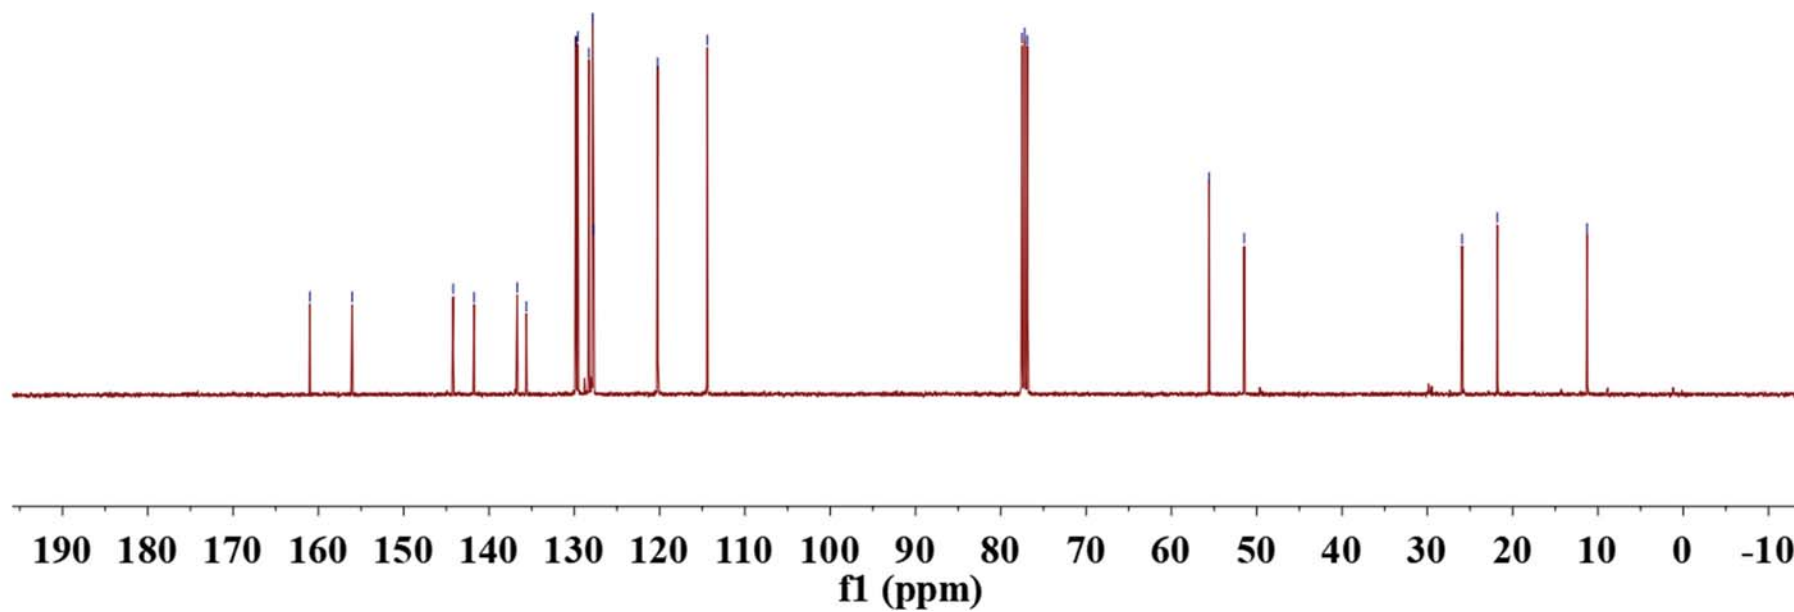

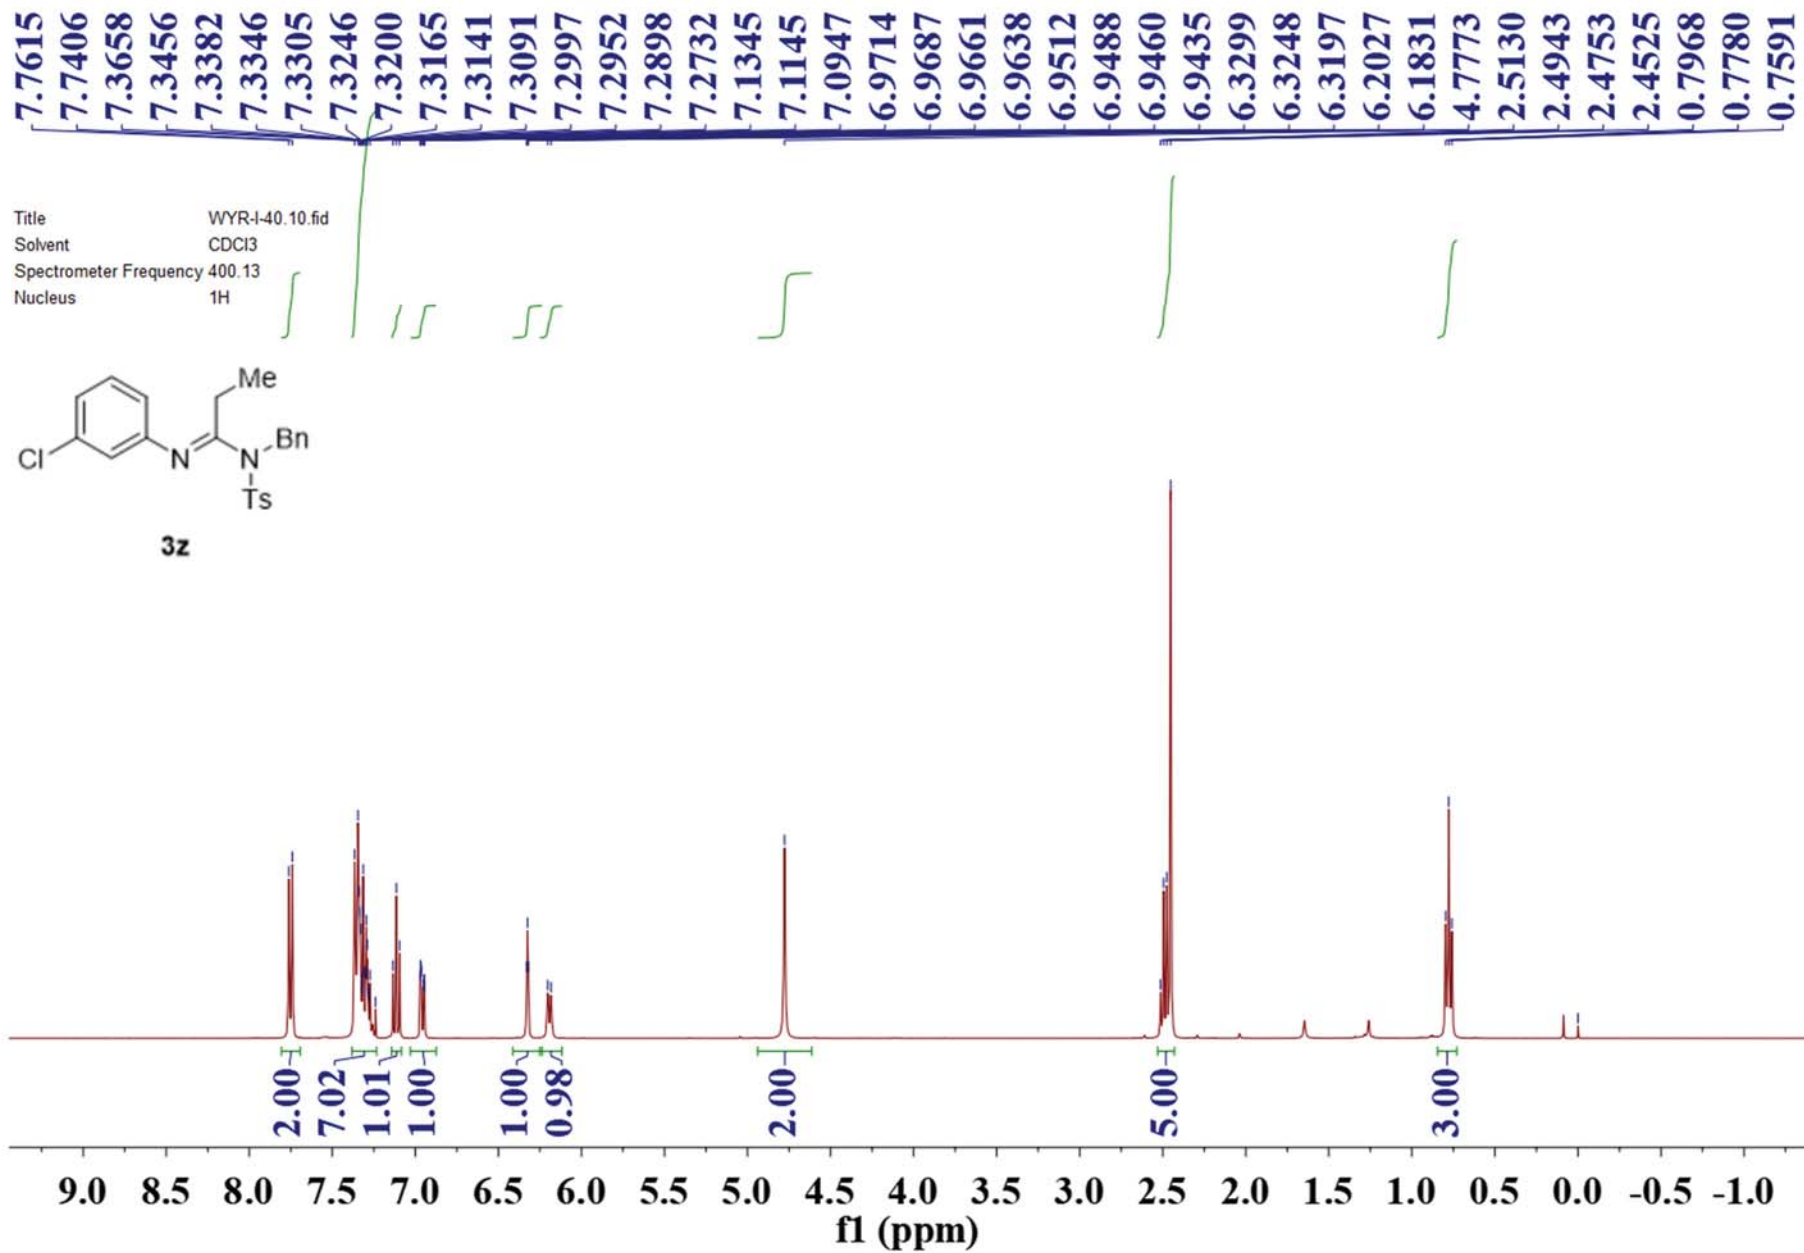



160.773  
 149.640  
 144.406  
 136.561  
 135.756  
 134.585  
 130.167  
 129.872  
 129.213  
 128.345  
 127.783  
 127.743  
 123.358  
 119.373  
 117.549  
 77.518  
 77.200  
 76.882  
 51.317  
 25.858  
 21.760  
 11.457

Title WYR-I-40.10.fid  
 Solvent CDCl3  
 Spectrometer Frequency 100.62  
 Nucleus 13C

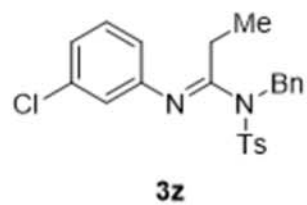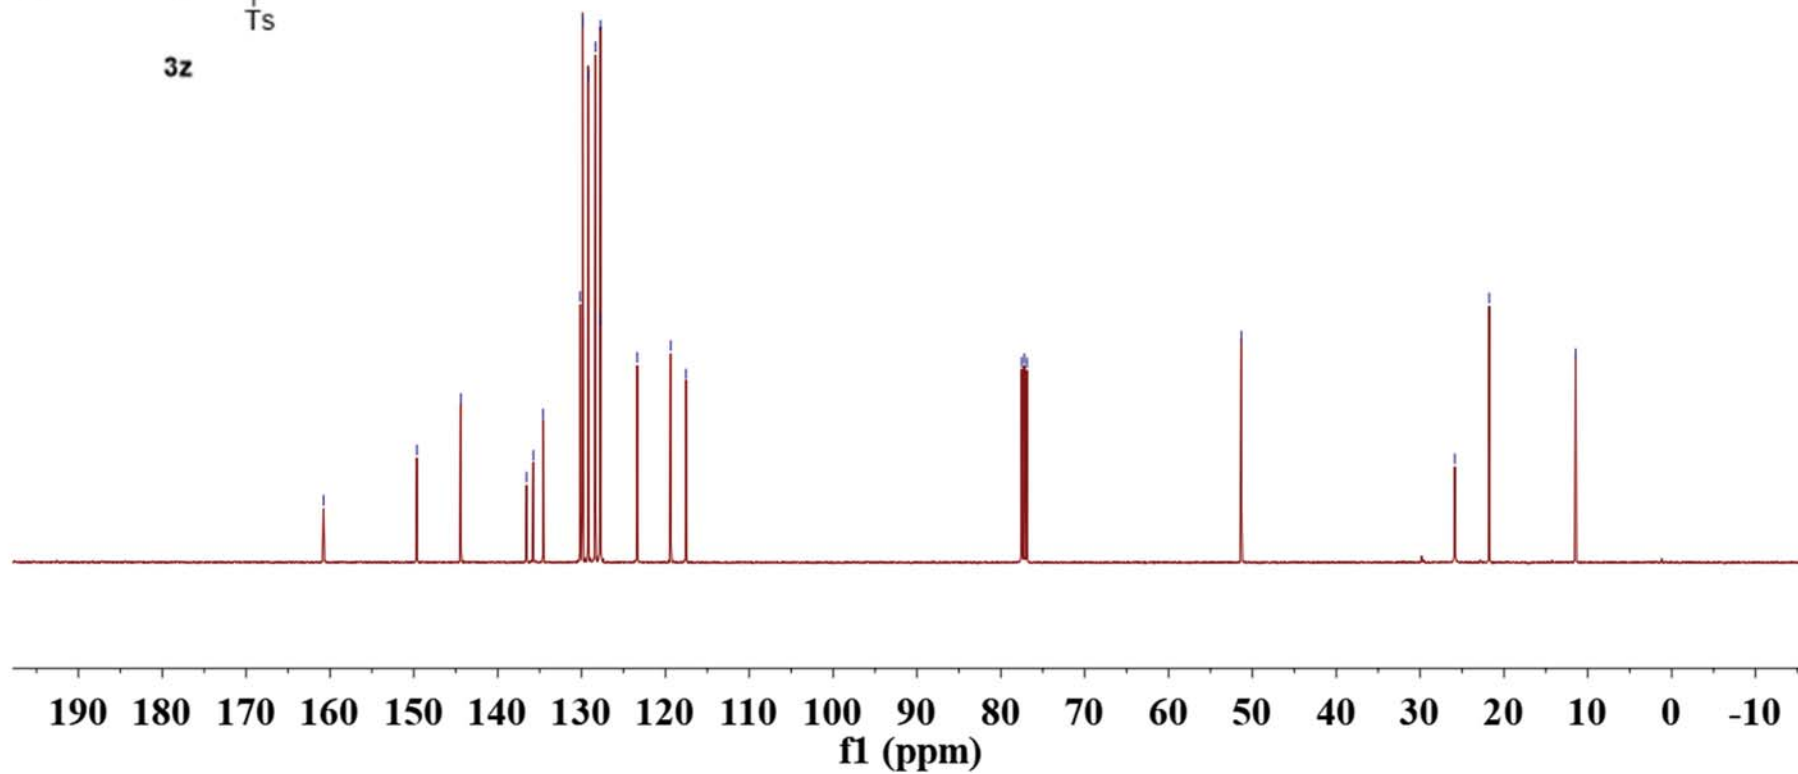

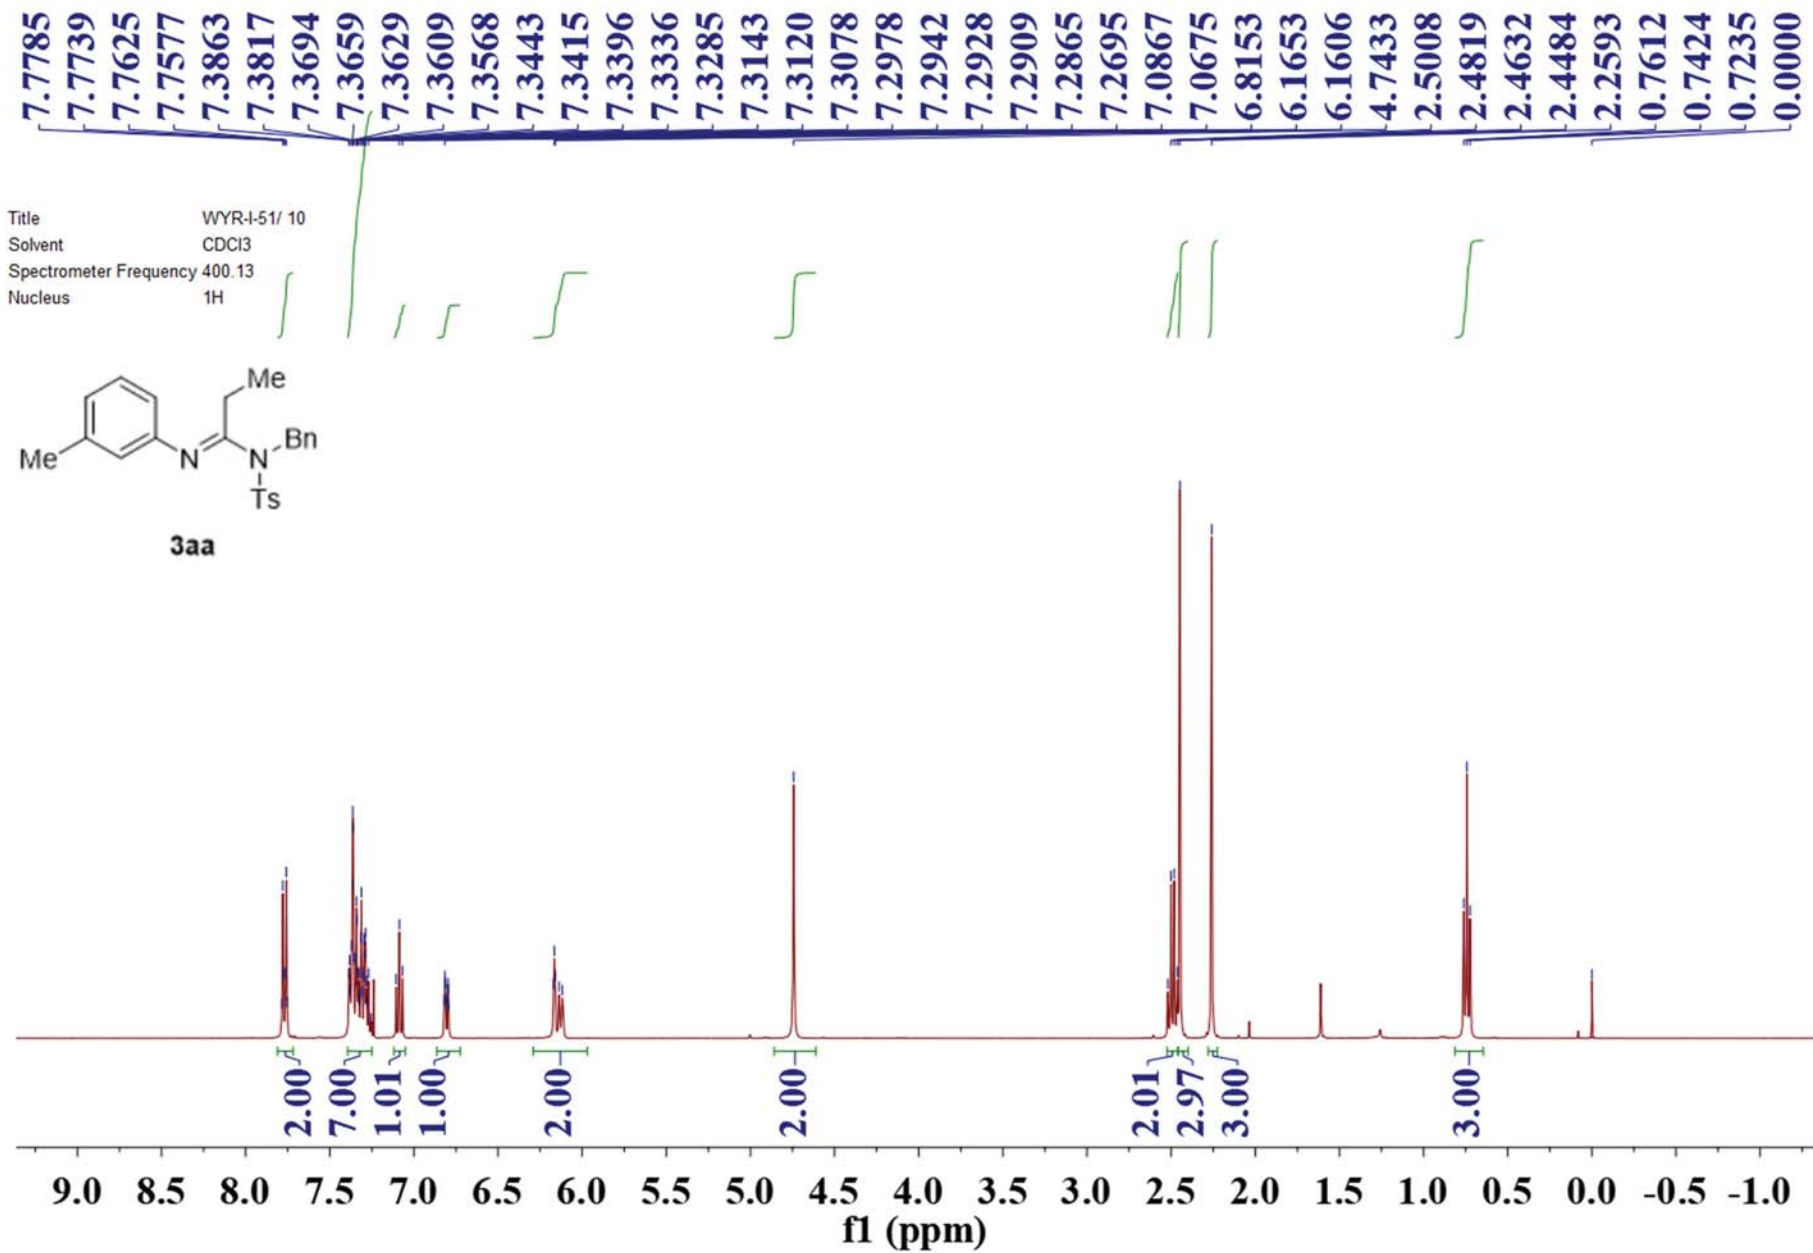

160.225  
 148.453  
 144.193  
 138.908  
 136.680  
 135.723  
 129.811  
 129.523  
 128.915  
 128.271  
 127.827  
 127.710  
 124.181  
 119.712  
 116.132  
 77.518  
 77.200  
 76.882  
 -51.389  
 -25.989  
 21.772  
 21.555  
 -11.400

Title WYR-I-51.10.fid  
 Solvent CDCl3  
 Spectrometer Frequency 100.62  
 Nucleus 13C

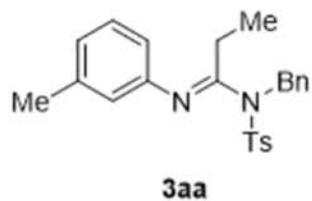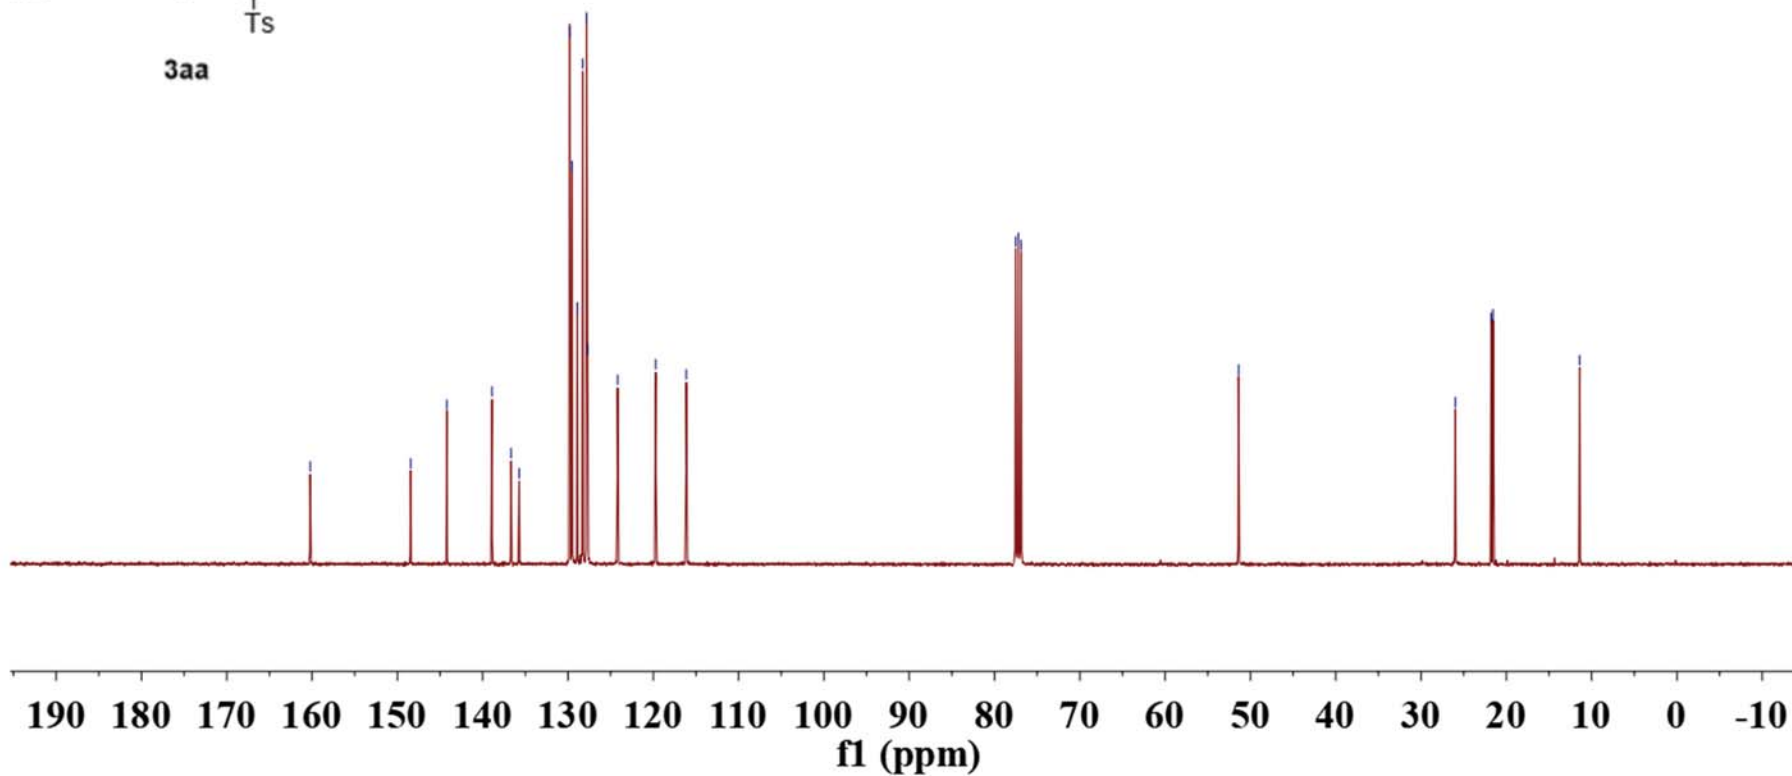

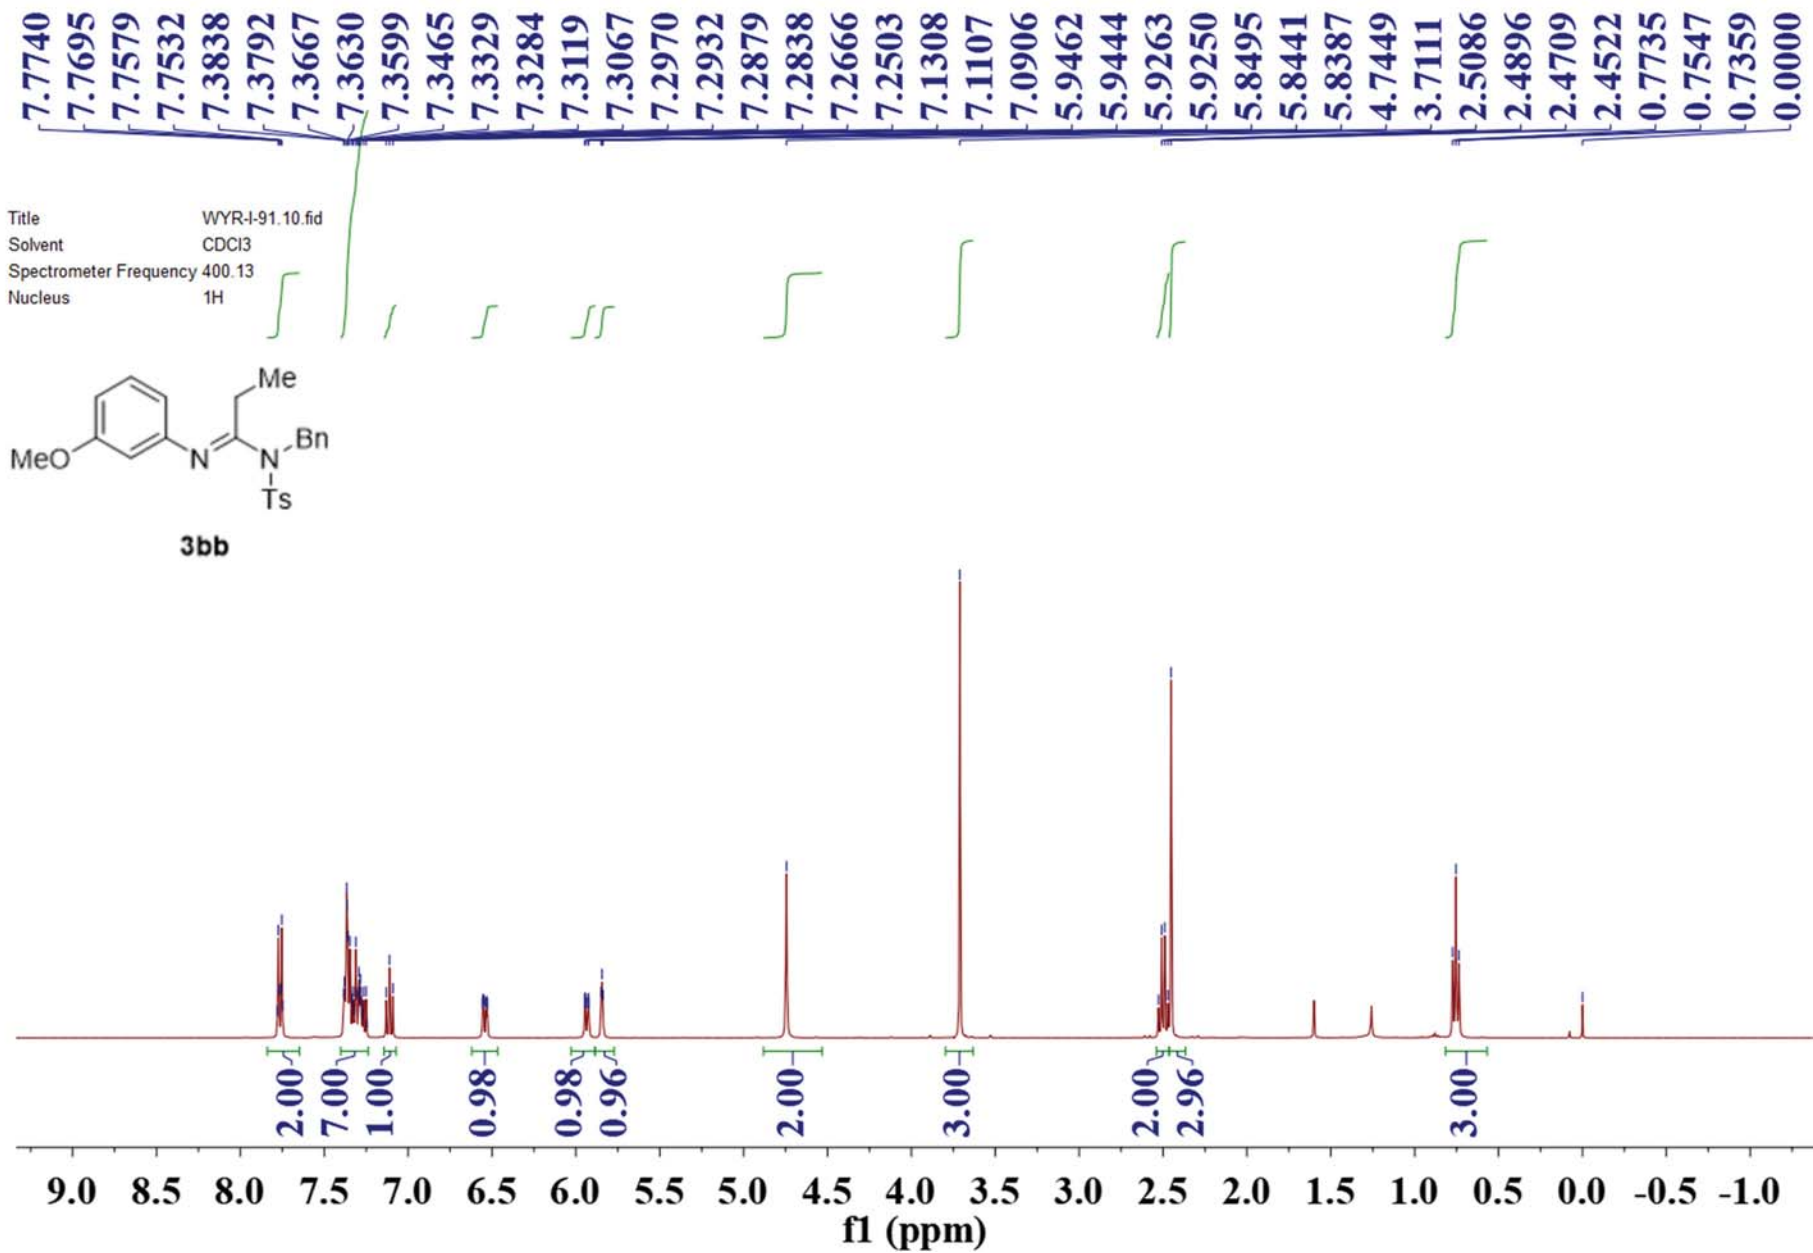

160.406  
 160.268  
 149.814  
 144.272  
 136.661  
 135.666  
 129.943  
 129.844  
 129.550  
 128.283  
 127.823  
 127.740  
 111.582  
 108.655  
 105.108  
 77.518  
 77.200  
 76.882  
 55.299  
 51.476  
 26.053  
 21.792  
 11.499

Title WYR-I-91.10.fid  
 Solvent CDCl3  
 Spectrometer Frequency 100.62  
 Nucleus 13C

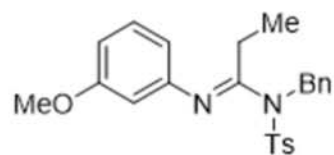

**3bb**

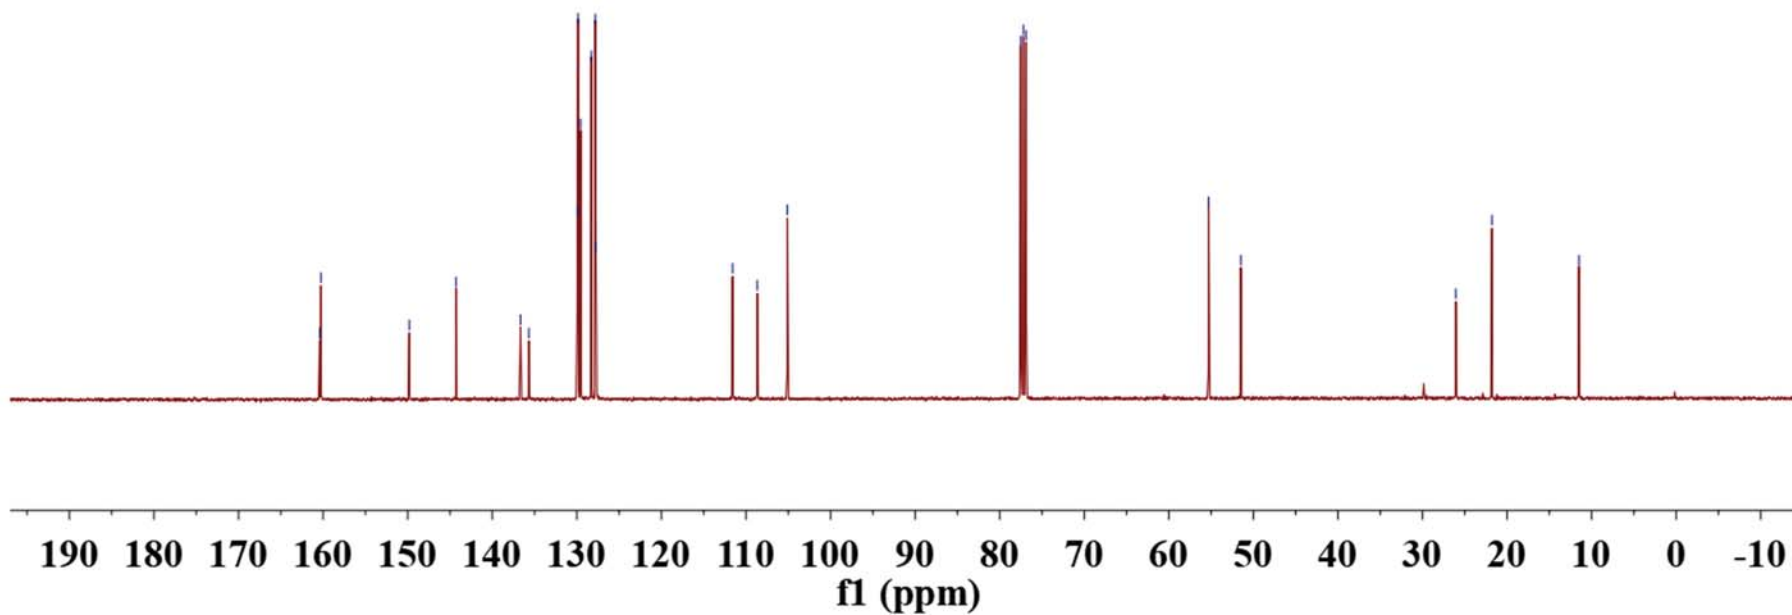

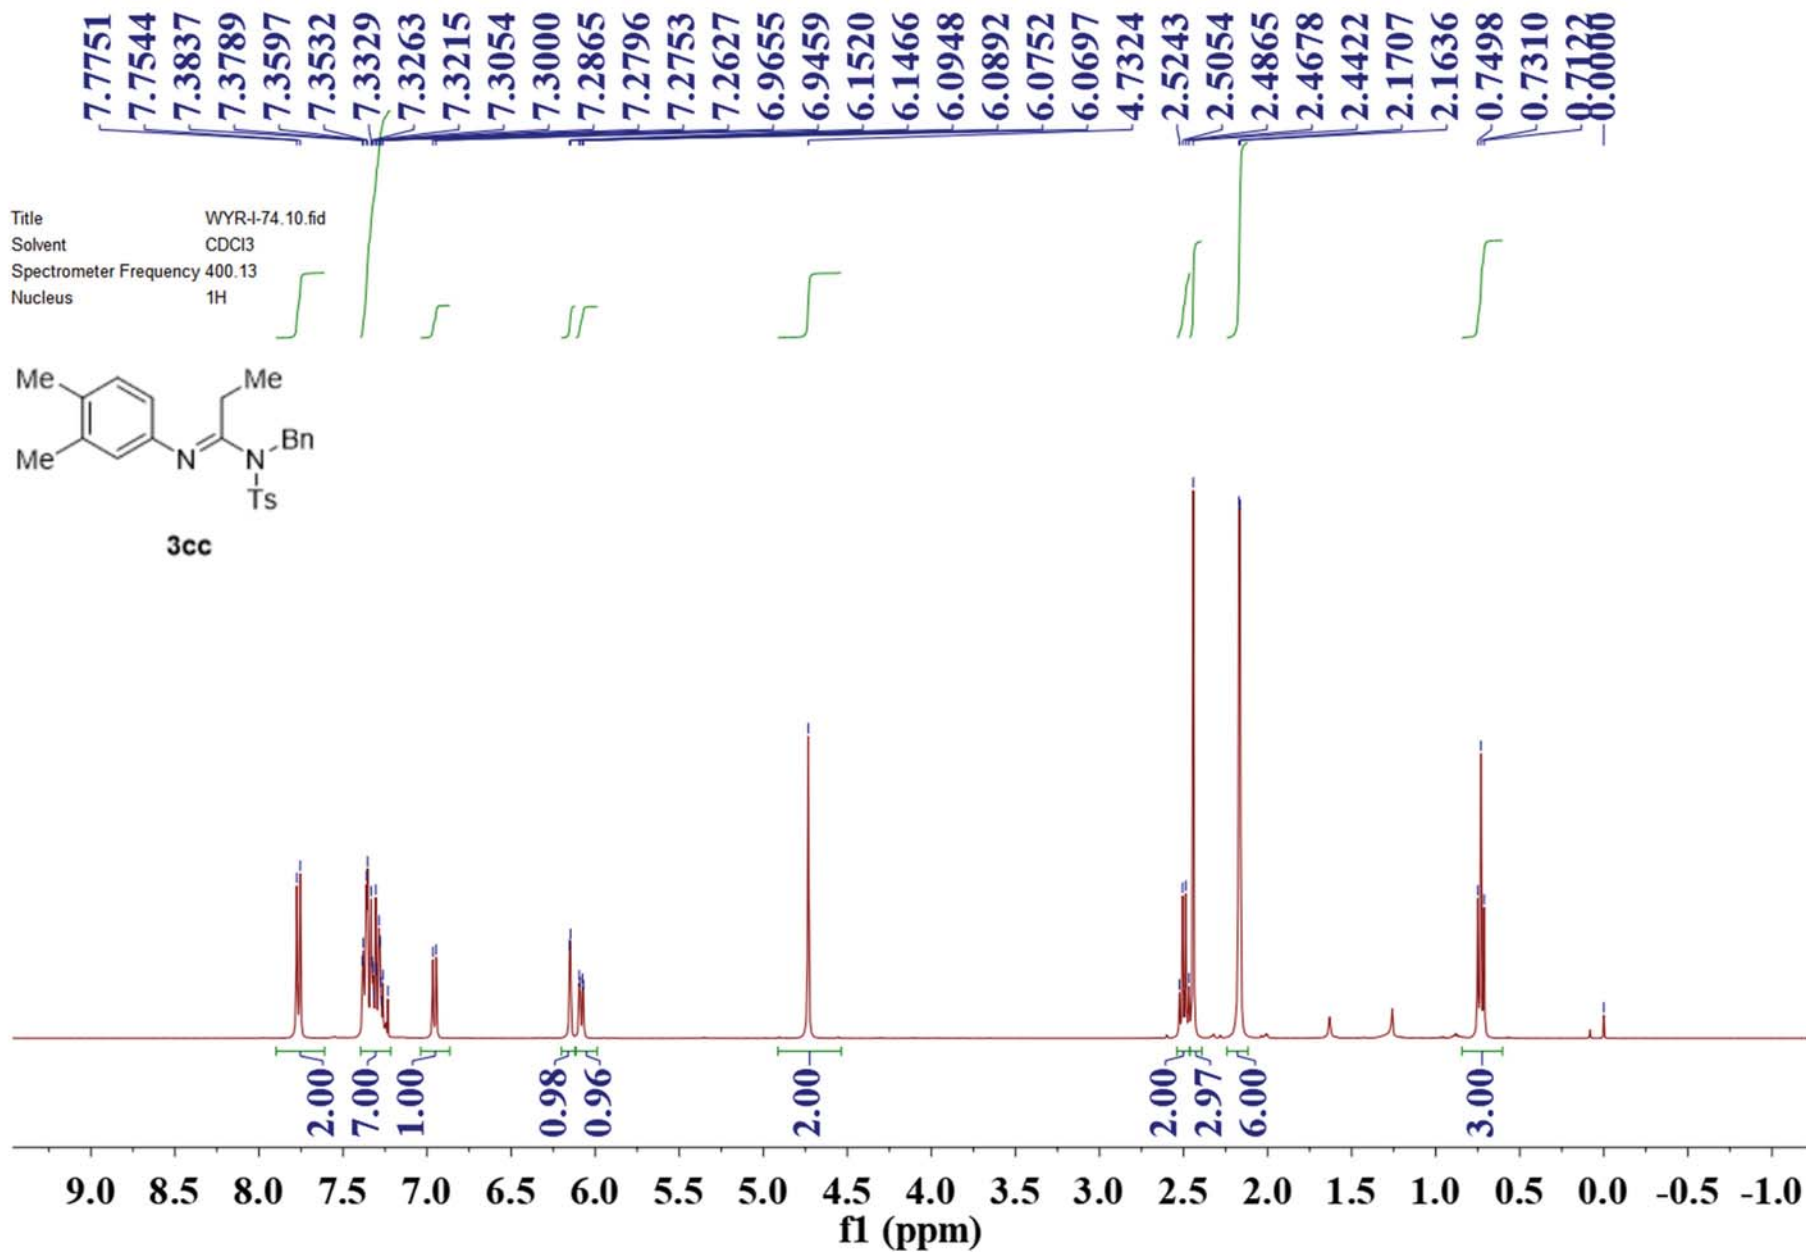

160.275  
 146.296  
 144.121  
 137.259  
 136.718  
 135.745  
 131.436  
 130.116  
 129.778  
 129.574  
 128.243  
 127.849  
 127.679  
 120.354  
 116.366  
 77.518  
 77.200  
 76.882  
 -51.389  
 25.905  
 21.757  
 19.989  
 19.213  
 11.386

Title WYR-I-74.11.fid  
 Solvent CDCl3  
 Spectrometer Frequency 100.62  
 Nucleus 13C

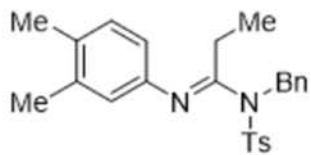

**3cc**

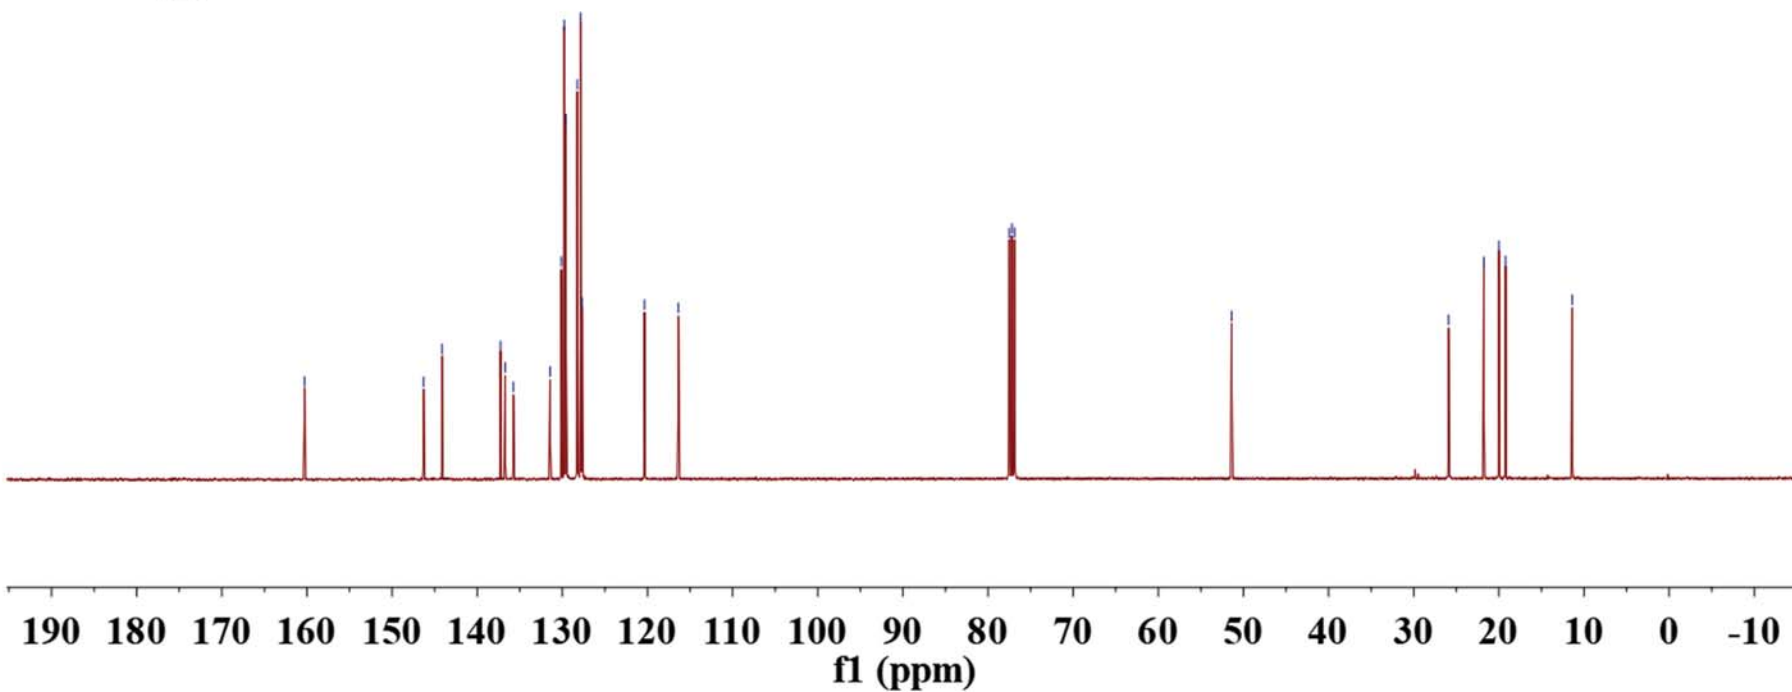

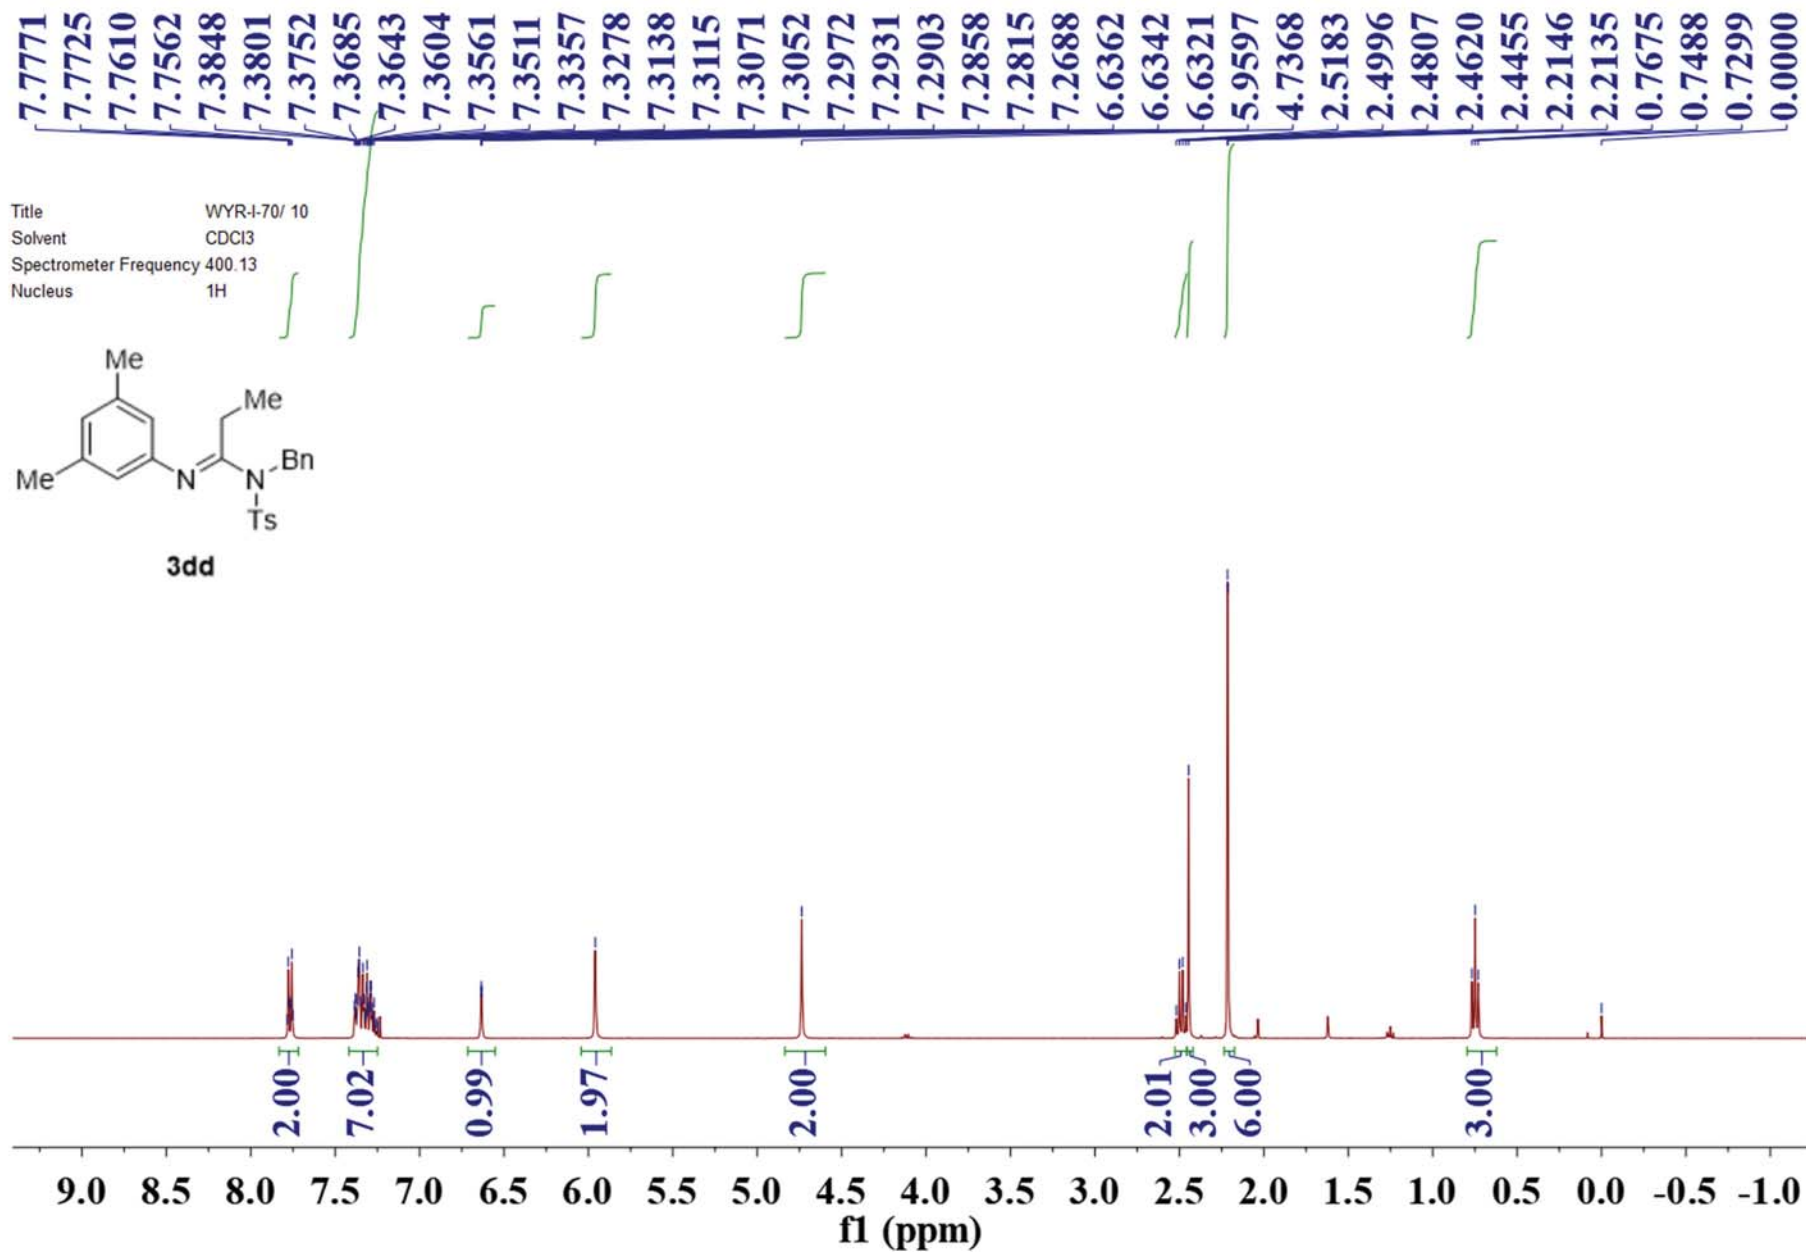



160.032  
 148.439  
 144.132  
 138.699  
 136.724  
 135.822  
 129.789  
 129.514  
 128.253  
 127.840  
 127.682  
 125.072  
 116.764  
 77.518  
 77.200  
 76.882  
 51.336  
 25.964  
 21.753  
 21.433  
 11.442

Title WYR-I-70.10.fid  
 Solvent CDCl3  
 Spectrometer Frequency 100.62  
 Nucleus 13C

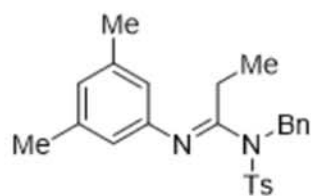

**3dd**

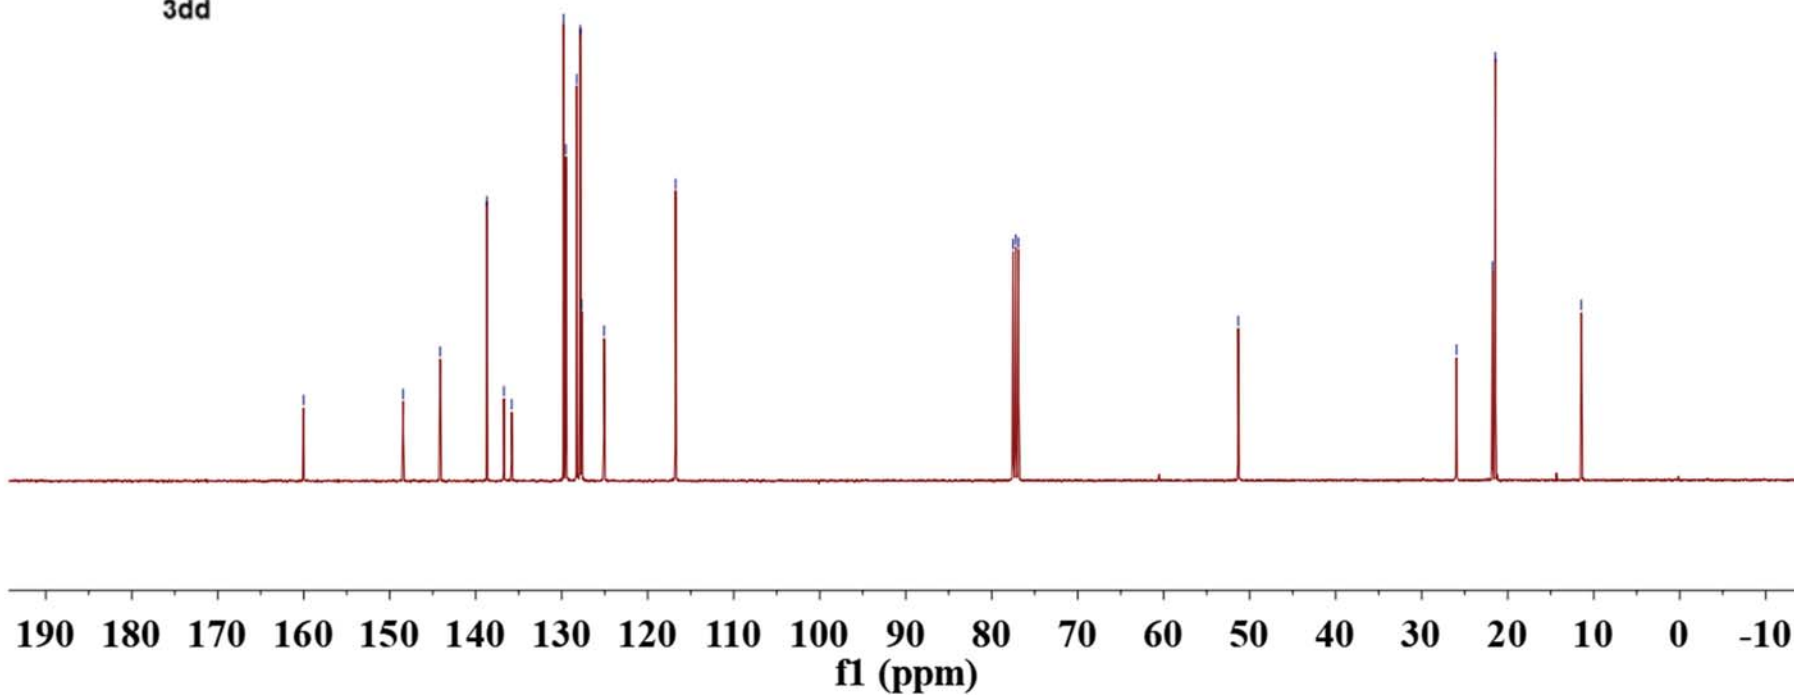

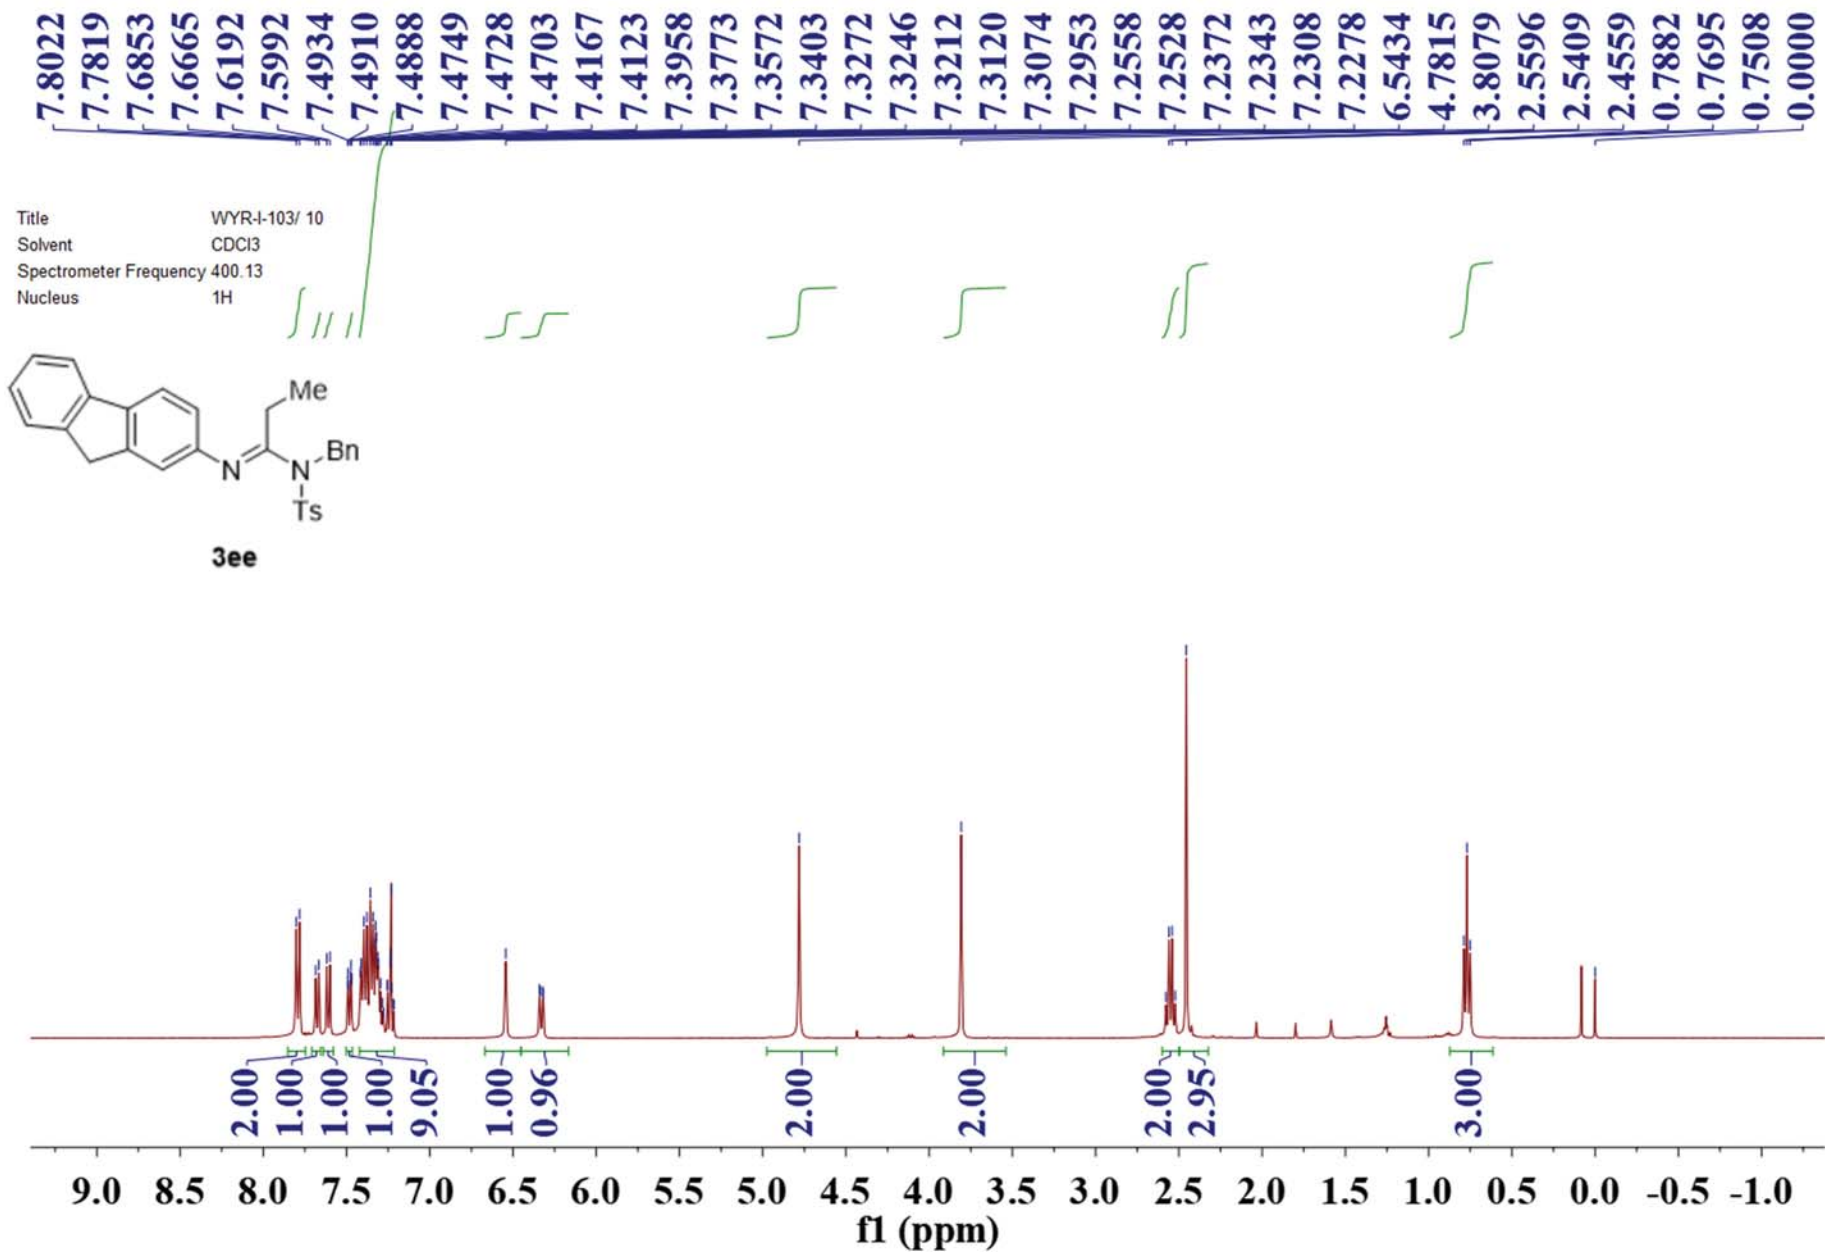

160.570  
 147.514  
 144.505  
 144.257  
 142.879  
 141.581  
 137.394  
 136.726  
 135.747  
 129.862  
 129.500  
 128.339  
 127.846  
 127.759  
 126.906  
 126.253  
 125.050  
 120.375  
 119.422  
 117.987  
 115.937  
 77.518  
 77.200  
 76.882  
 -51.427  
 -37.064  
 26.087  
 21.808  
 11.427

Title WYR-I-103/ 10  
 Solvent CDCl3  
 Spectrometer Frequency 100.62  
 Nucleus 13C

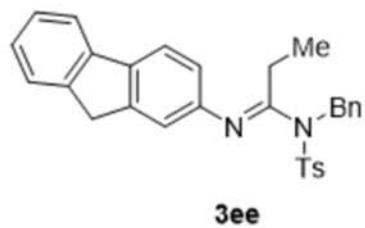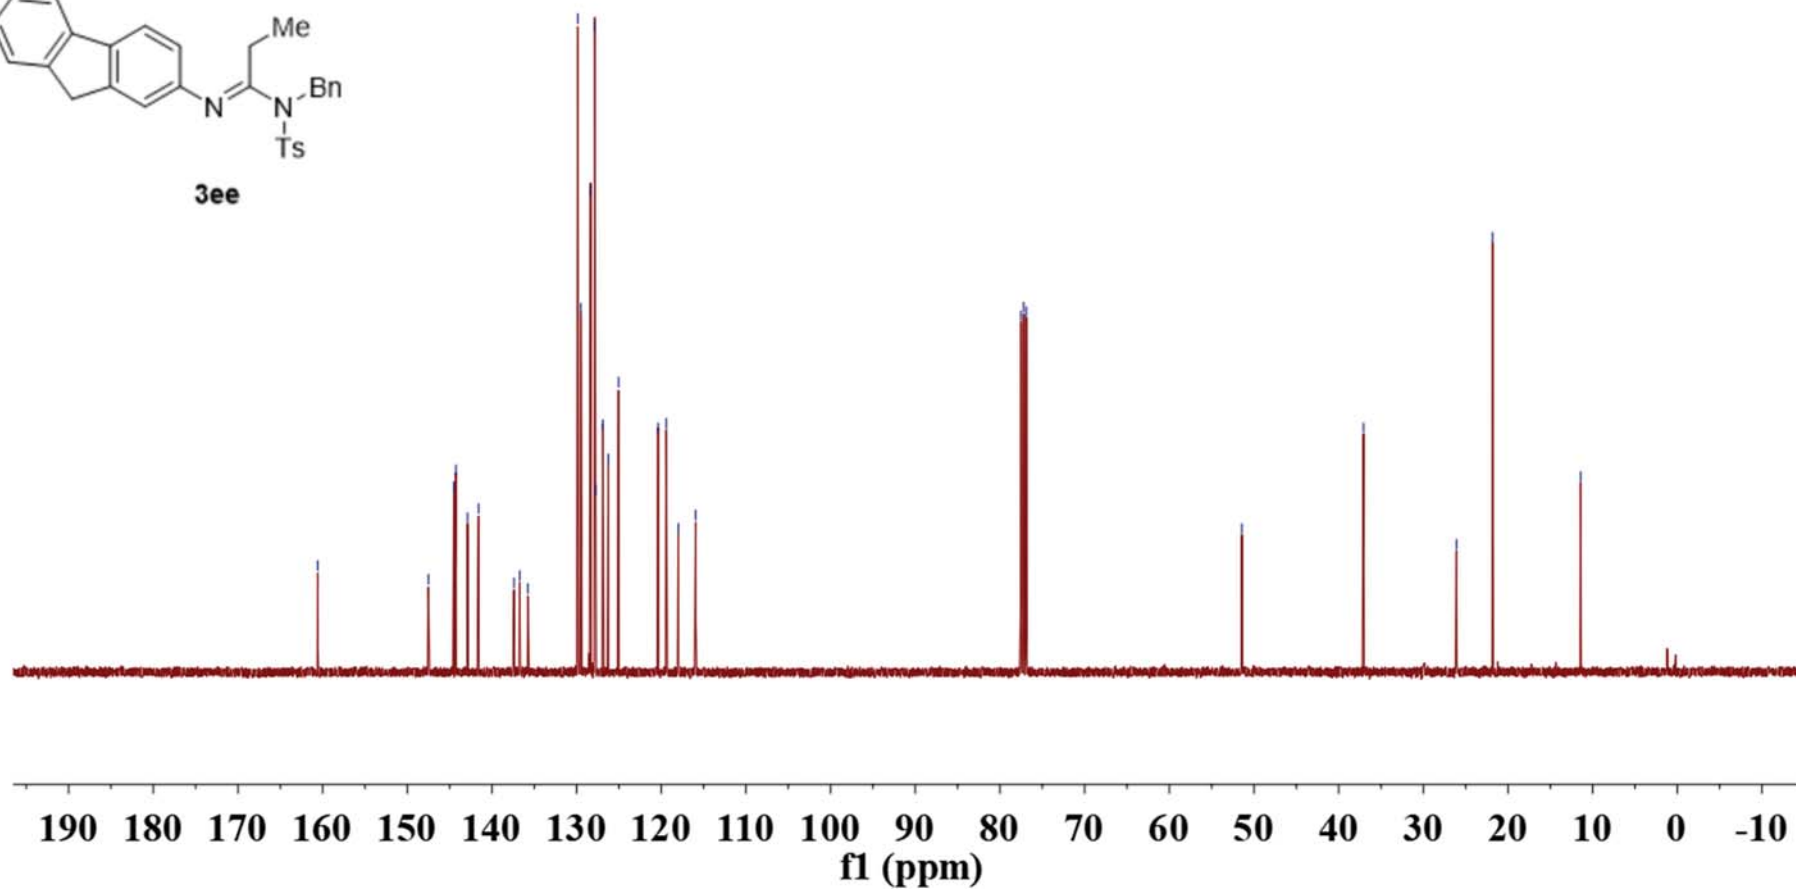

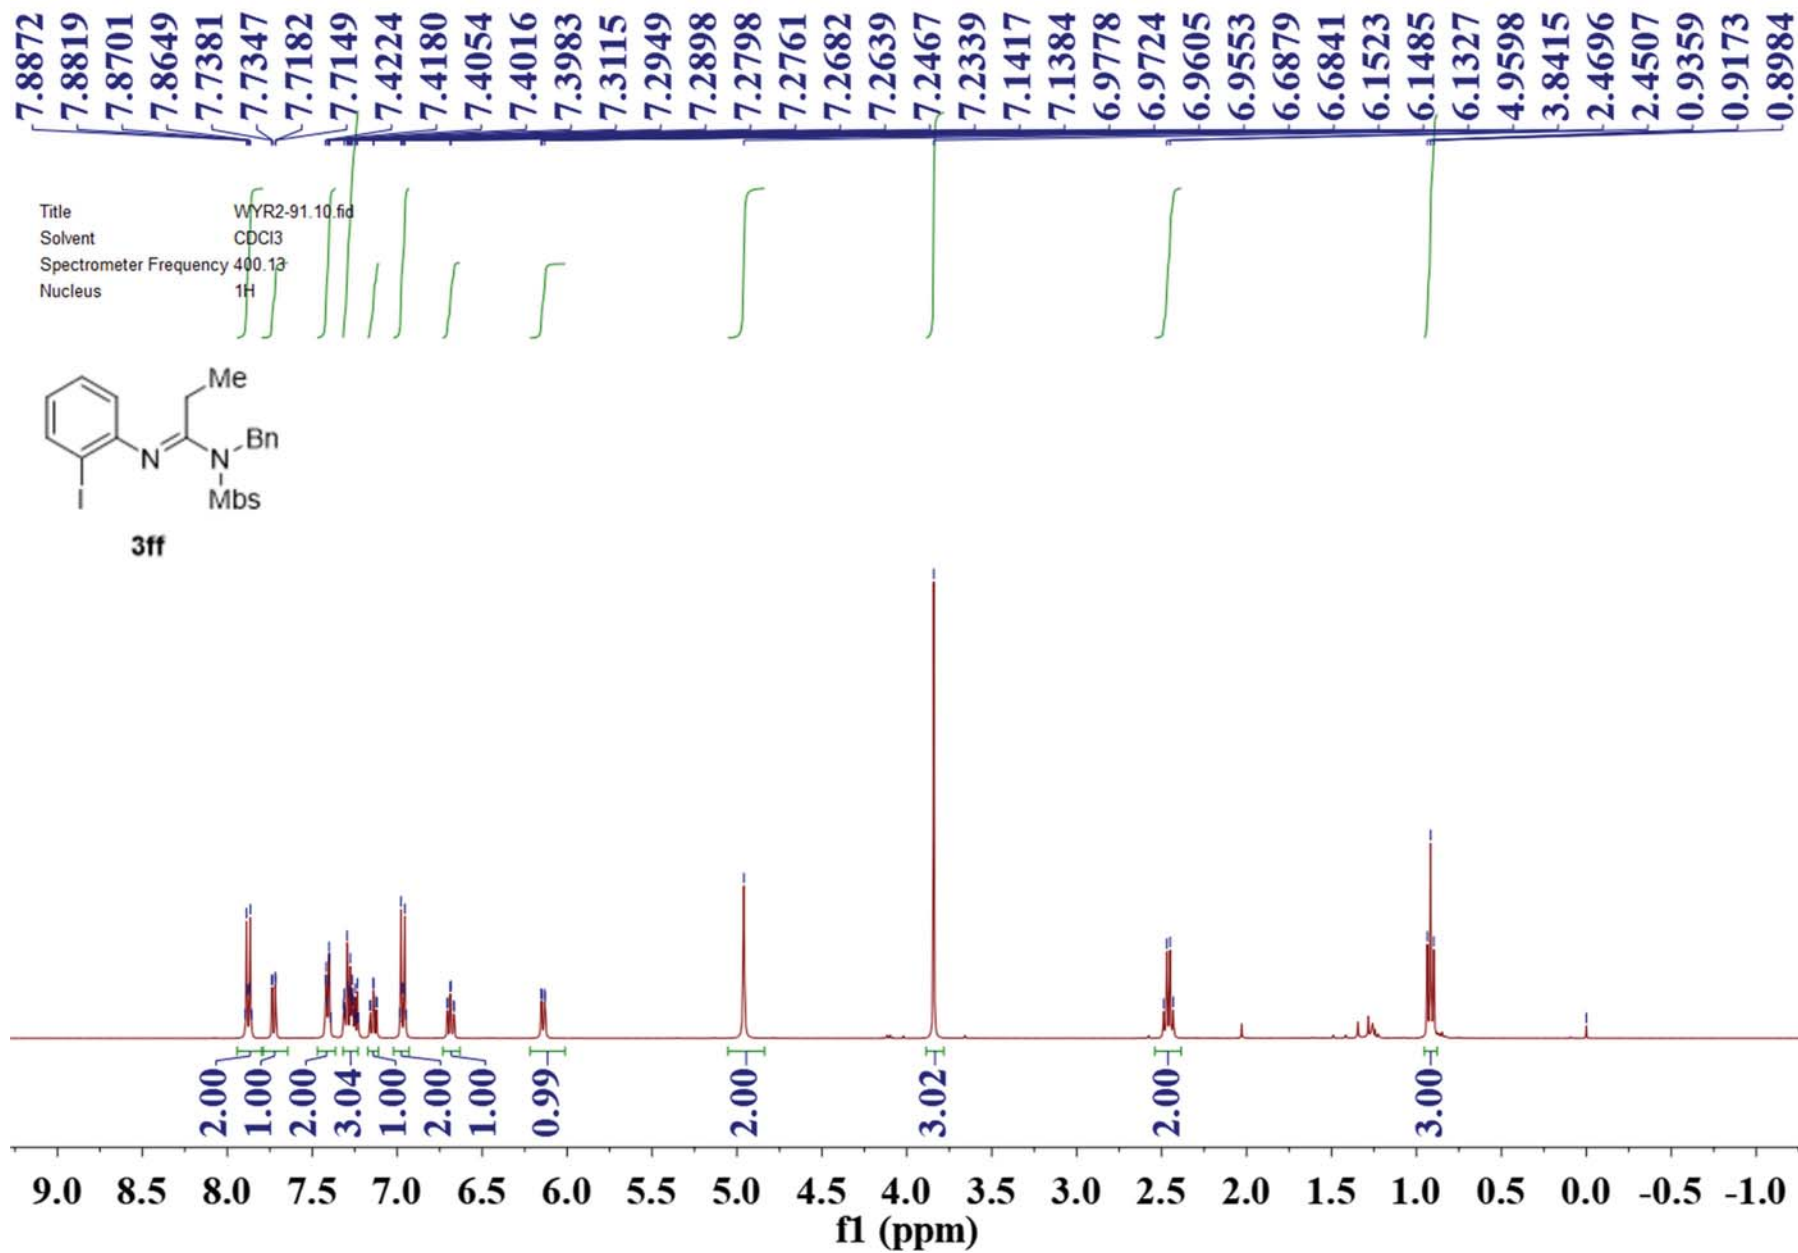

~163.406  
 ~160.843  
 ~150.042  
 139.015  
 137.076  
 131.185  
 130.149  
 128.965  
 128.787  
 128.302  
 127.503  
 124.667  
 119.651  
 114.417  
 ~90.066  
 77.518  
 77.200  
 76.882  
 ~55.812  
 ~51.120  
 ~25.933  
 ~11.541

Title WYR2-91/ 10  
 Solvent CDCl3  
 Spectrometer Frequency 100.62  
 Nucleus 13C

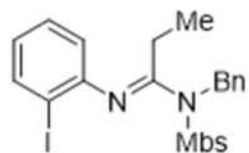

**3ff**

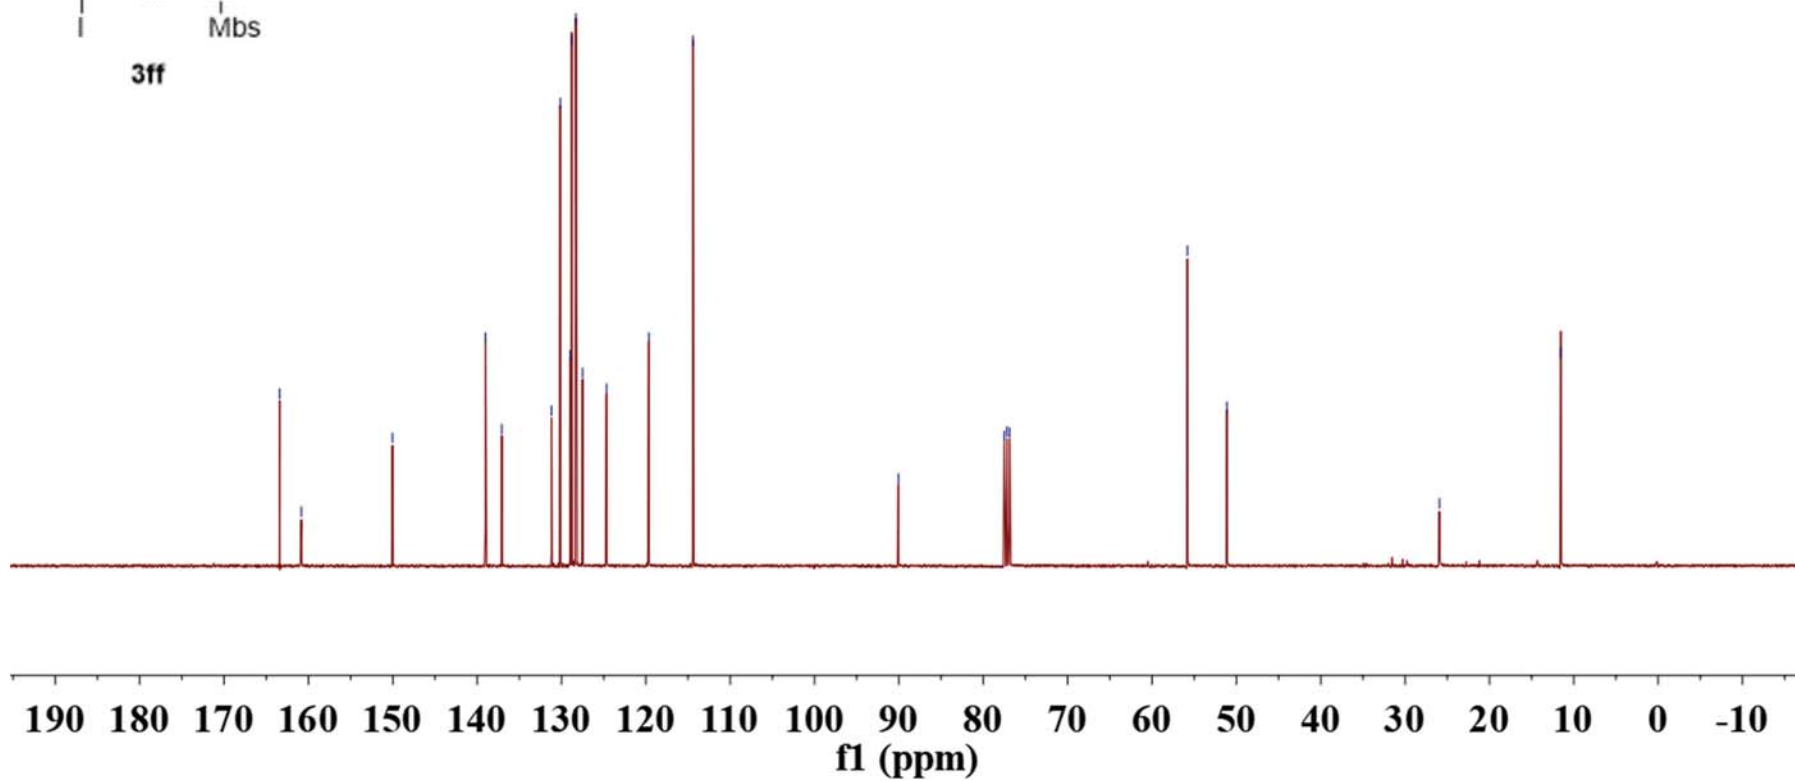

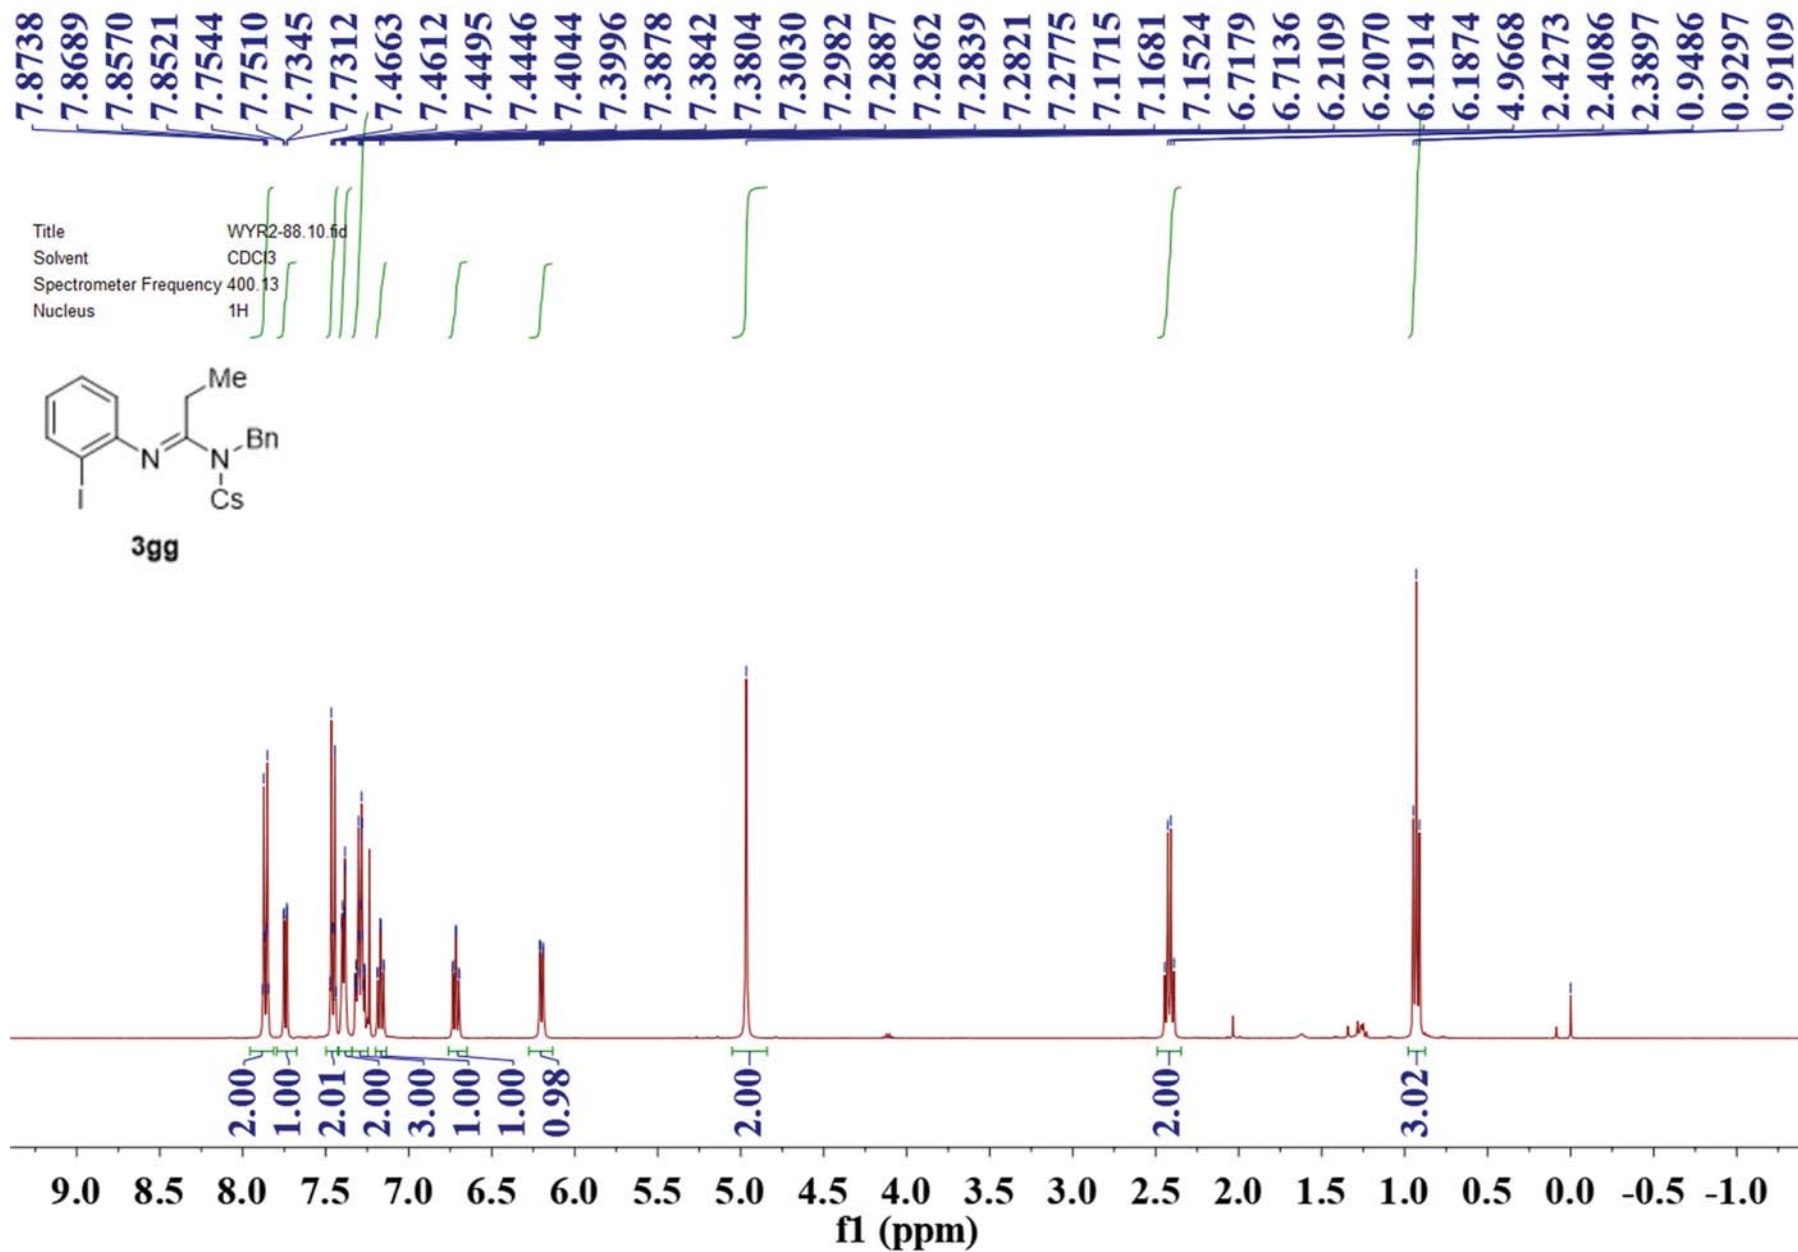

160.681  
149.757  
139.772  
139.098  
138.194  
136.553  
129.657  
129.441  
129.062  
128.749  
128.464  
127.766  
124.925  
119.588  
89.904  
77.518  
77.200  
76.882  
-51.221  
-25.783  
-11.460

Title WYR2-88/ 10  
Solvent CDCl3  
Spectrometer Frequency 100.62  
Nucleus 13C

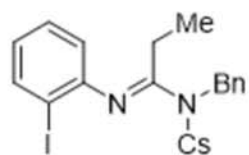

3gg

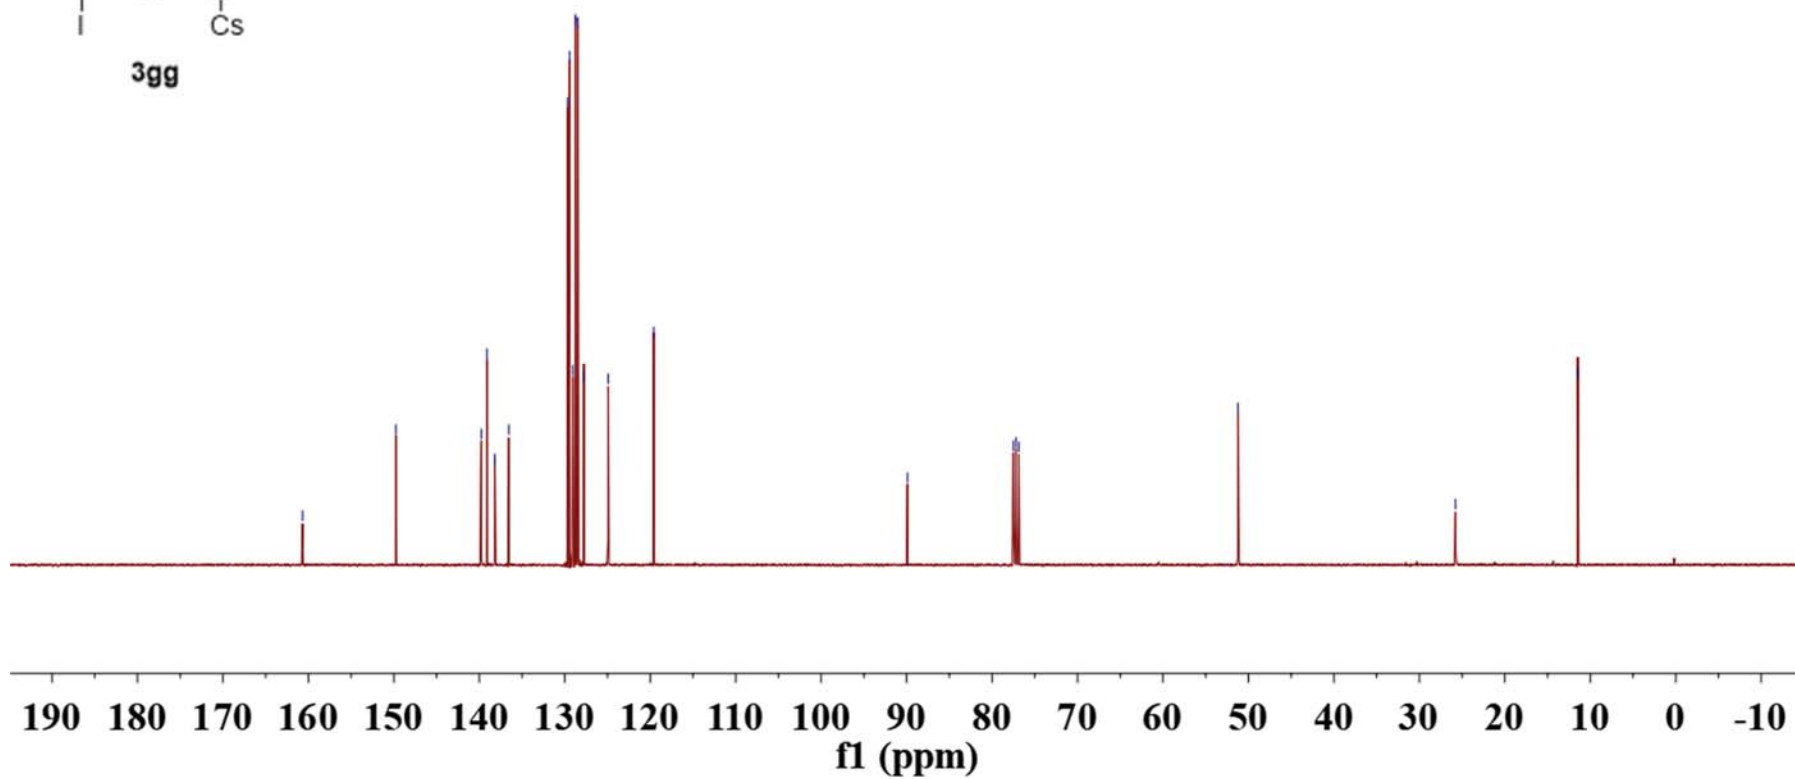

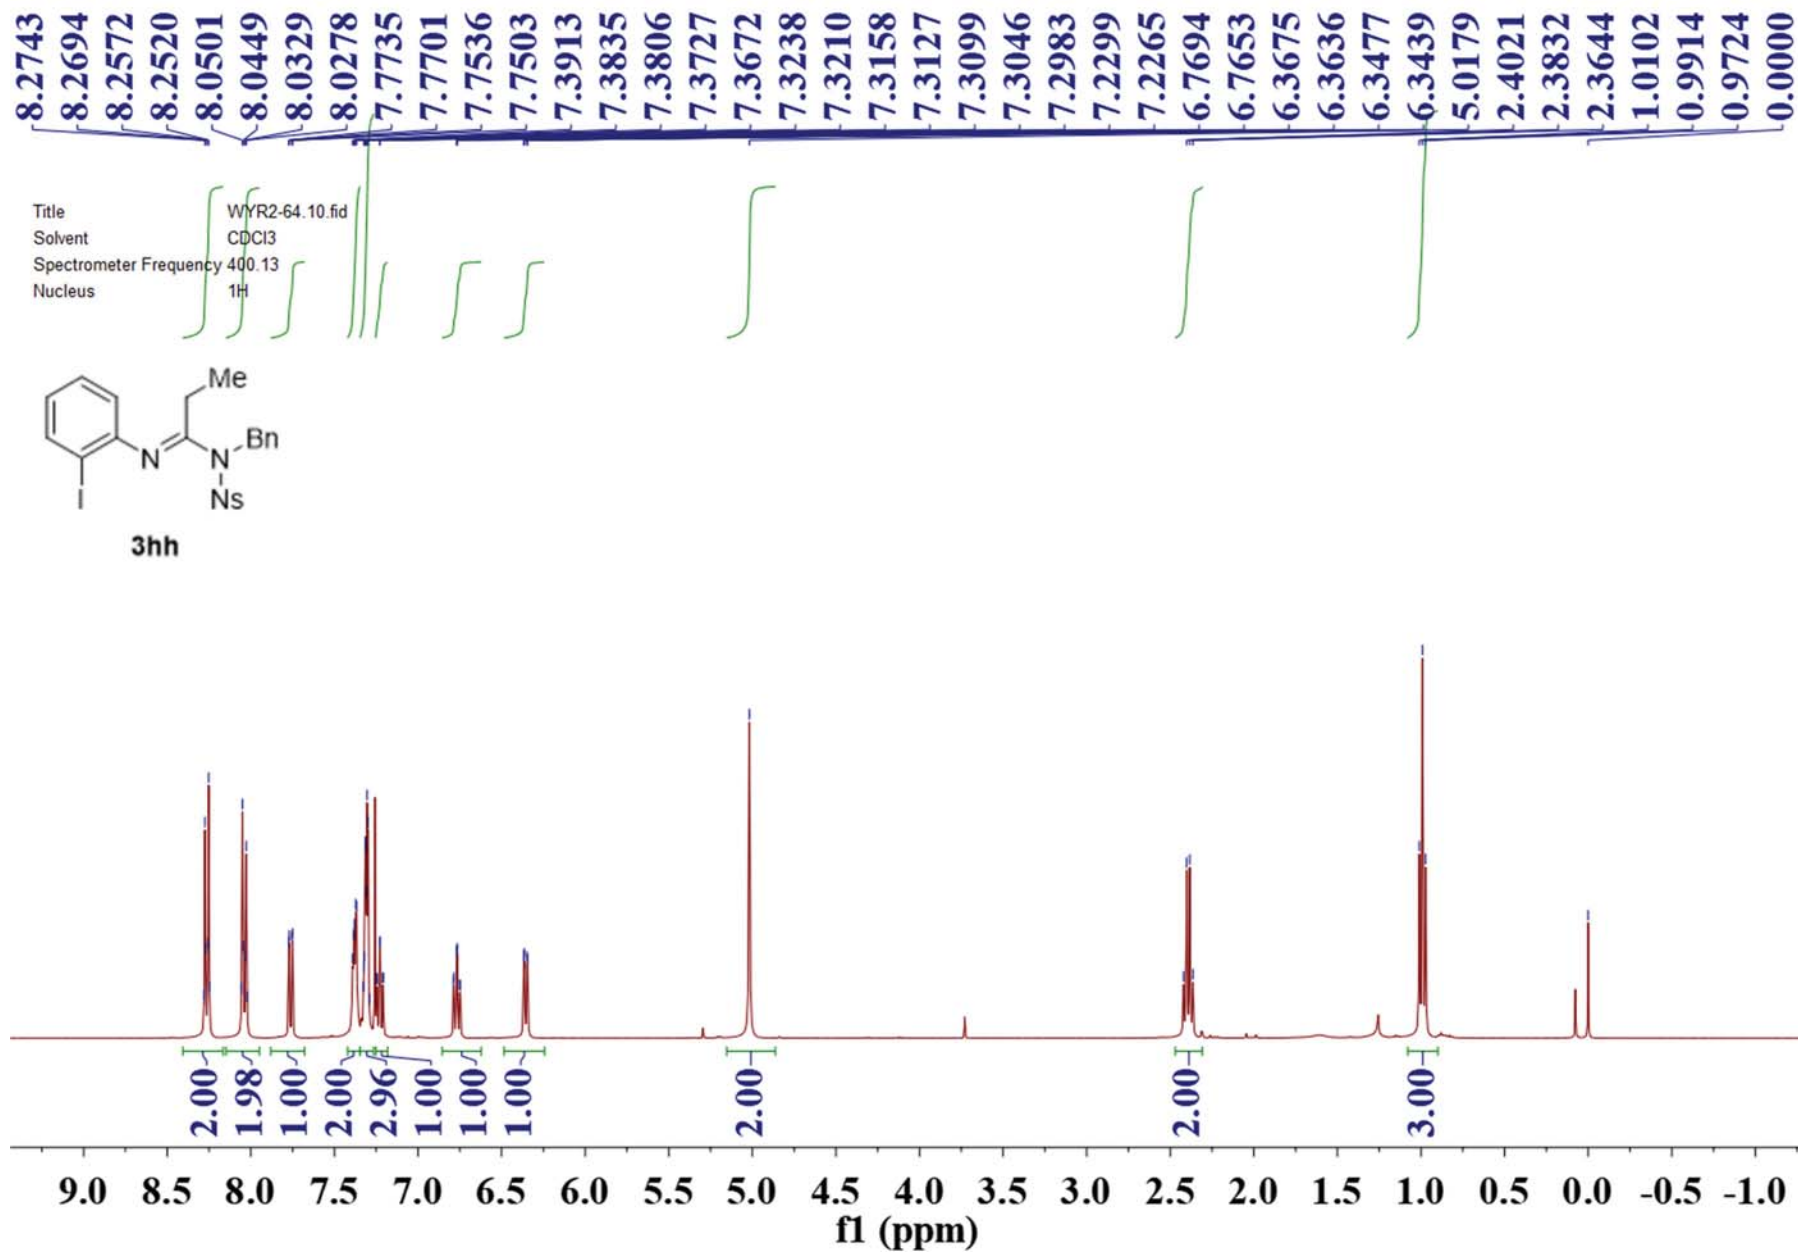



160.568  
150.240  
149.432  
145.703  
139.222  
136.054  
129.911  
129.231  
128.749  
128.591  
128.157  
125.303  
124.113  
119.621

-89.925  
77.518  
77.200  
76.882

-51.195

-25.357

-11.383

Title WYR2-64.10.fid  
Solvent CDCl3  
Spectrometer Frequency 100.62  
Nucleus 13C

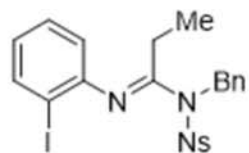

3hh

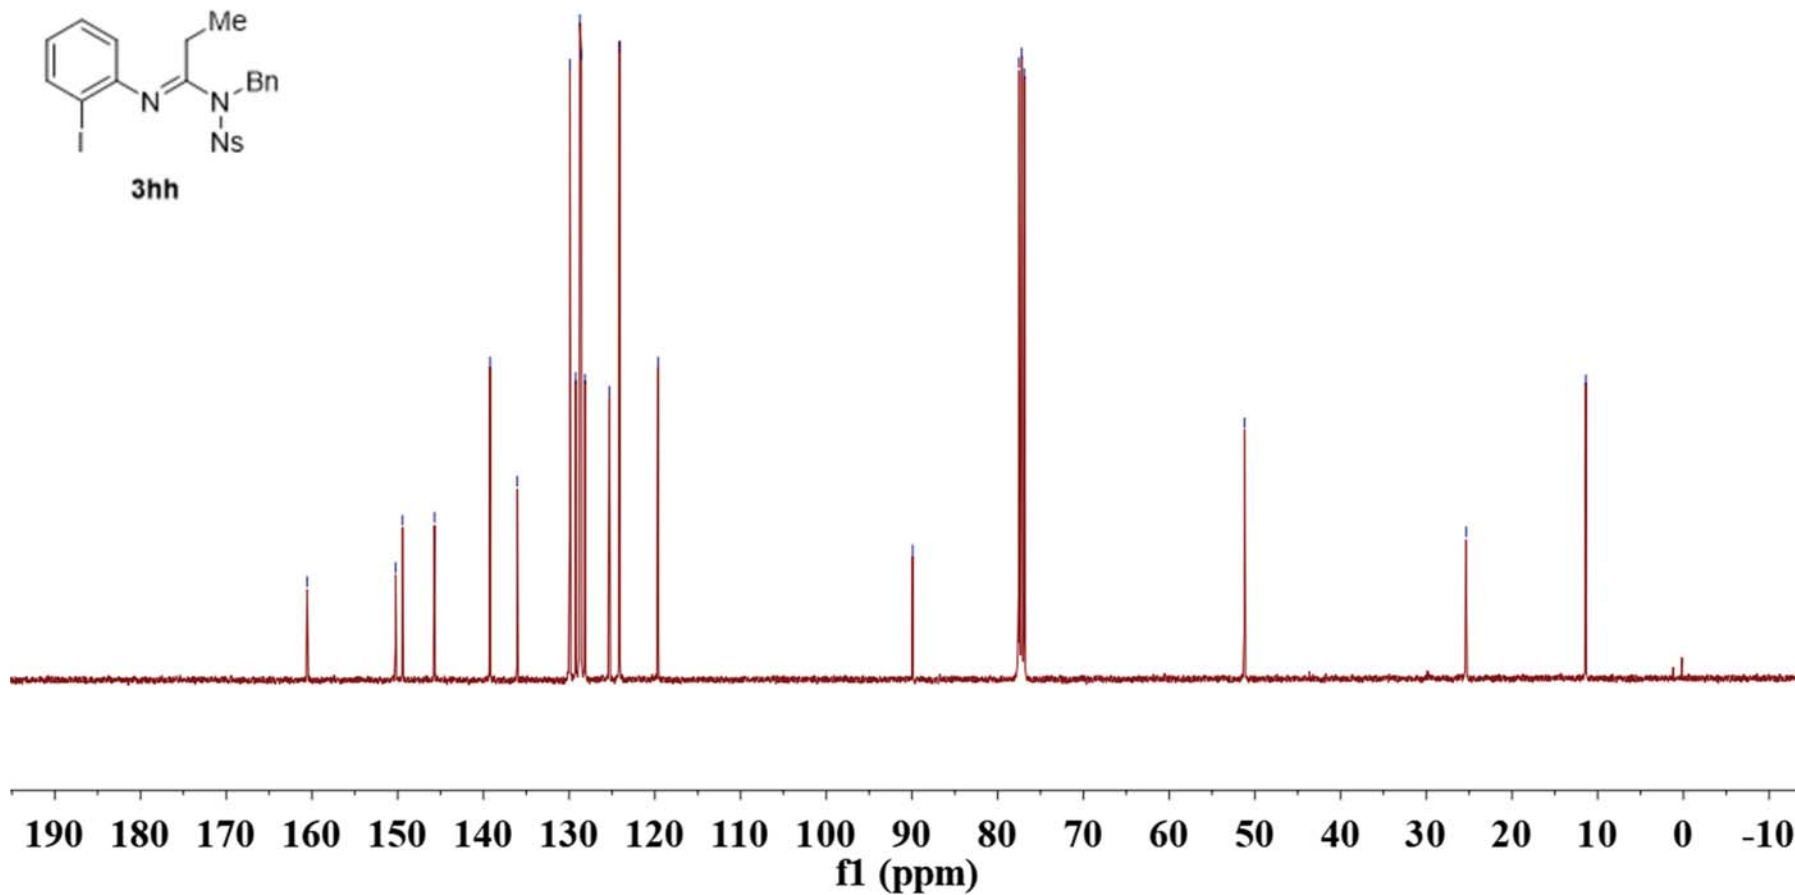

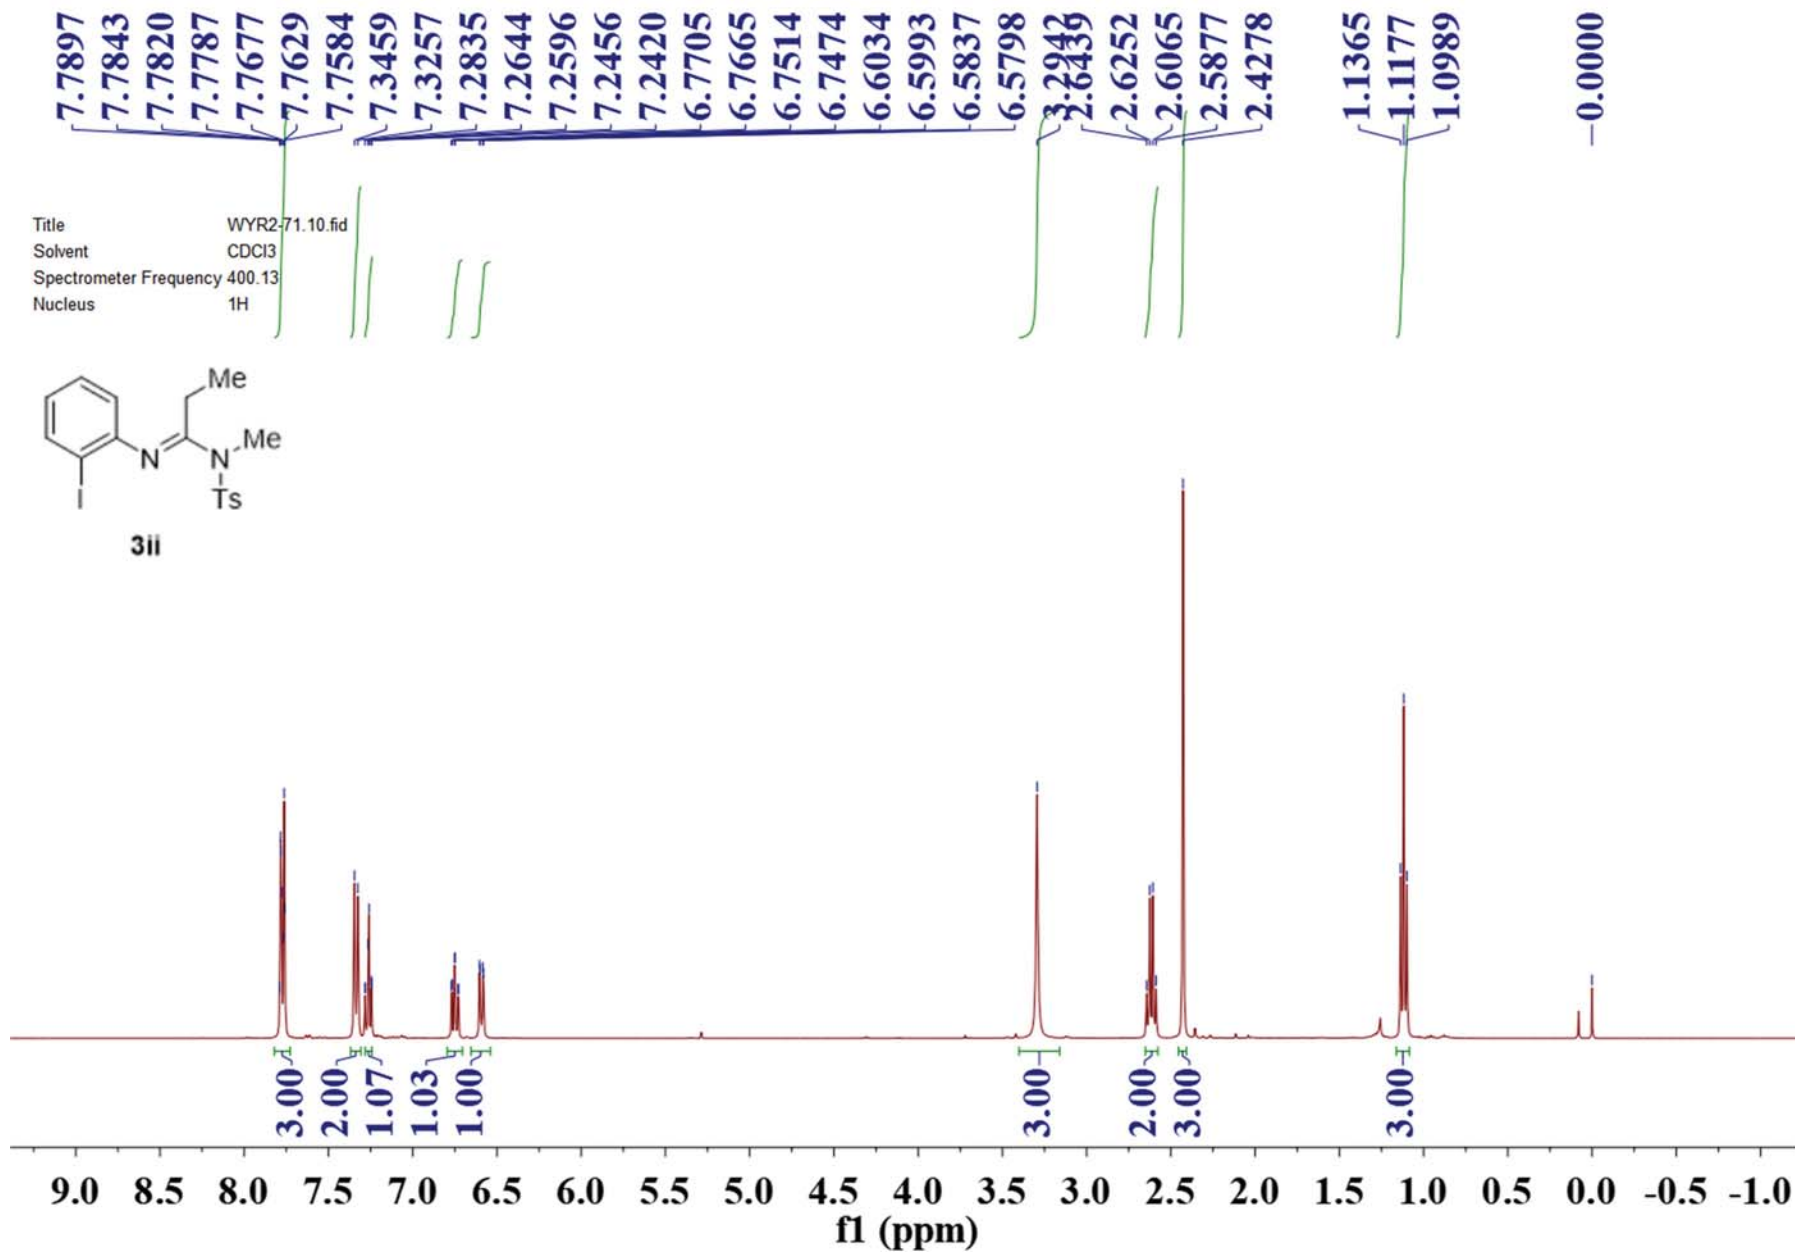

162.634  
150.012  
144.406  
139.063  
135.502  
129.964  
129.093  
127.582  
124.889  
119.822

90.876  
77.518  
77.200  
76.882

36.459  
25.730  
21.748  
12.183

Title WYR2-71.10.fid  
Solvent CDCl3  
Spectrometer Frequency 100.62  
Nucleus 13C

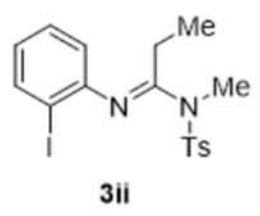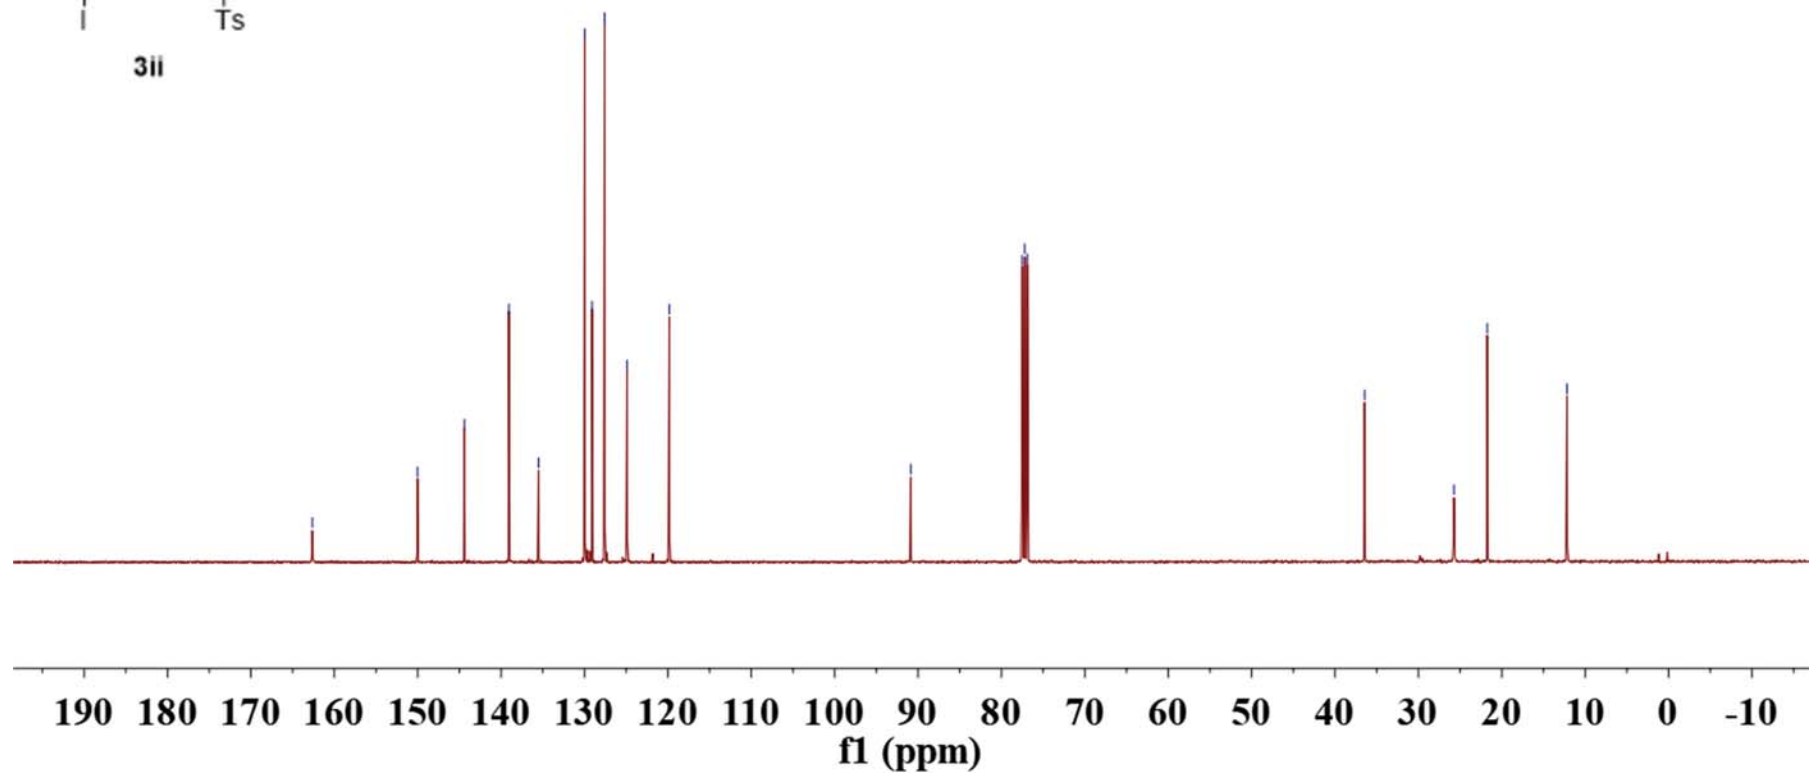

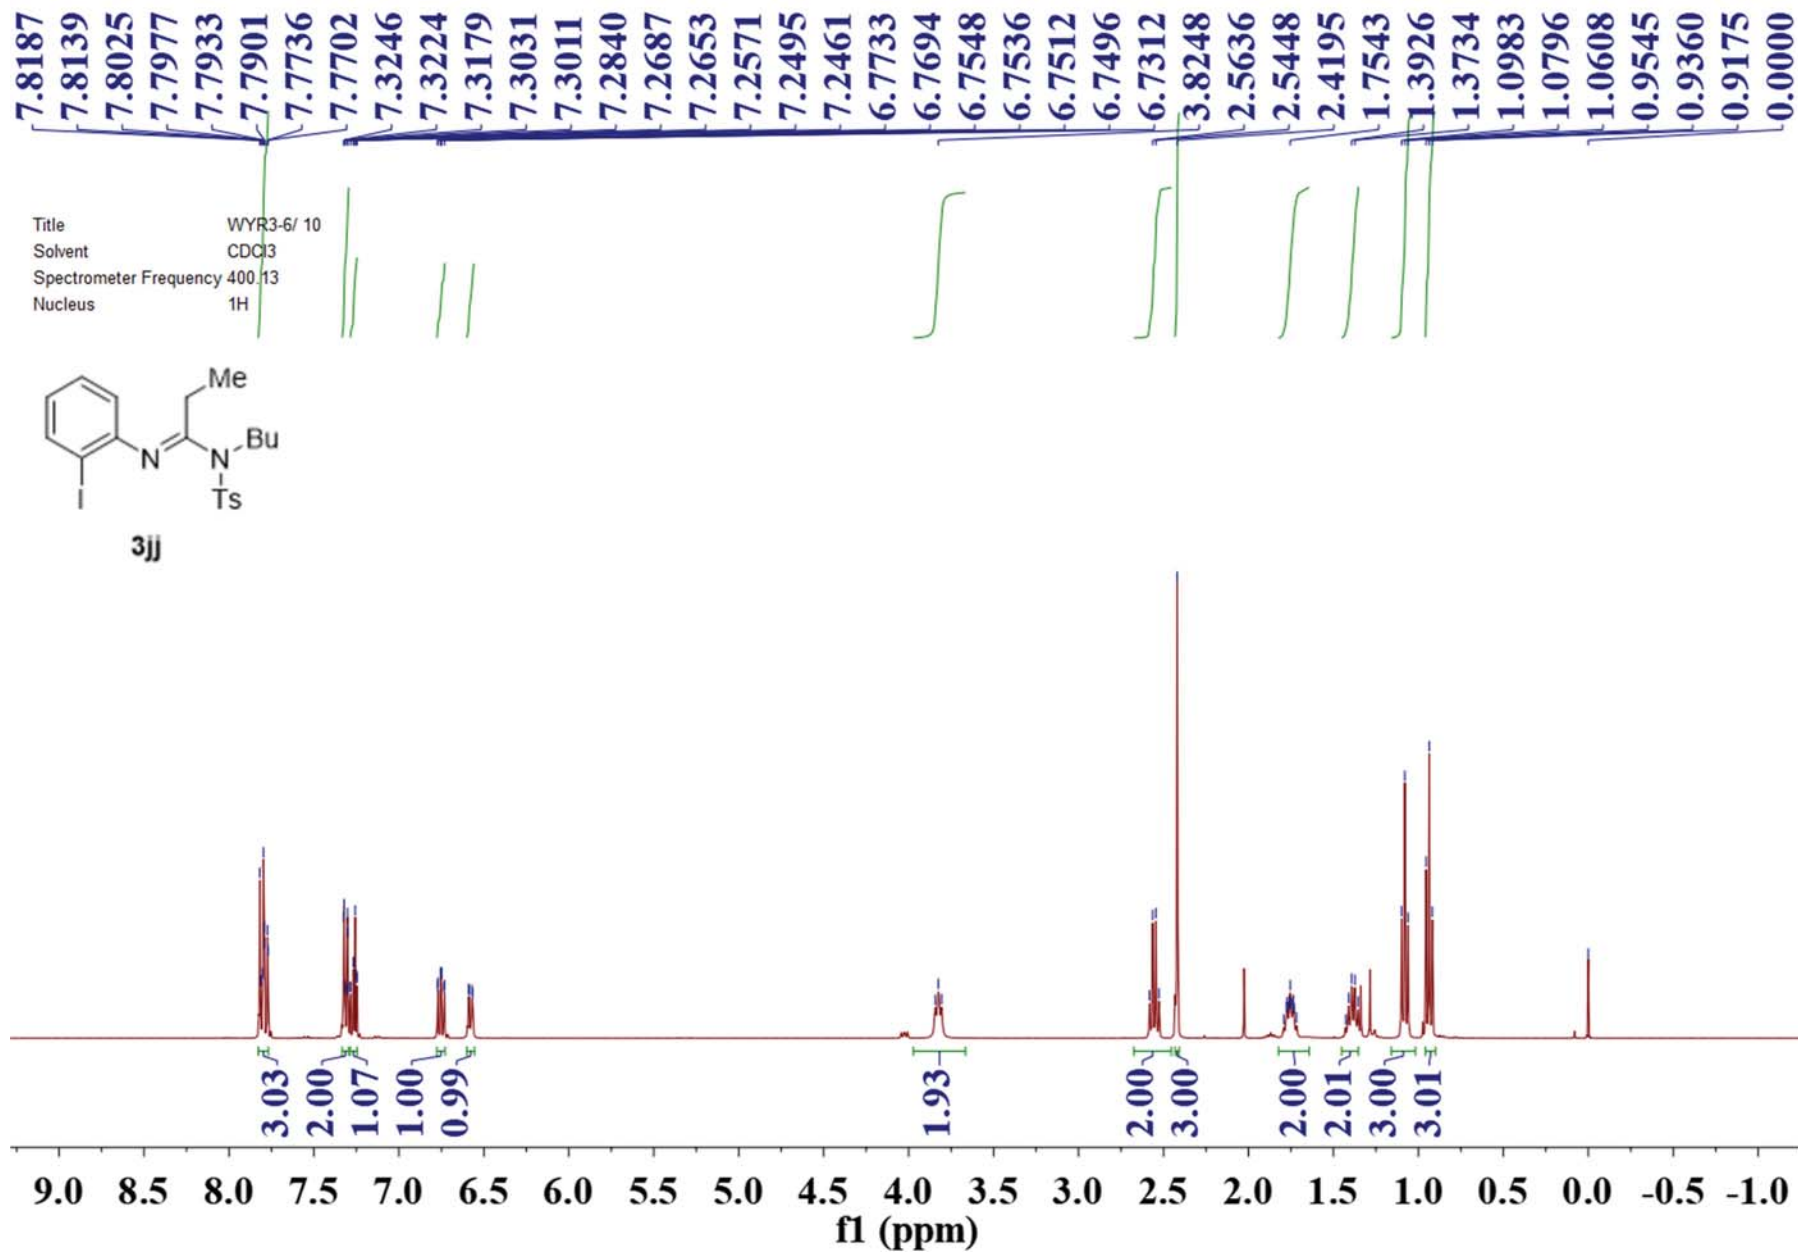

-161.687  
 -150.207  
 -144.065  
 -139.232  
 -137.041  
 -129.875  
 -129.083  
 -127.651  
 -124.848  
 -119.821

-90.607  
 77.518  
 77.200  
 76.882

-48.006

~31.675  
 21.744  
 20.141  
 14.013  
 ~11.924

Title WYR3-6/ 10  
 Solvent CDCl3  
 Spectrometer Frequency 100.62  
 Nucleus 13C

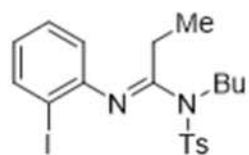

3j

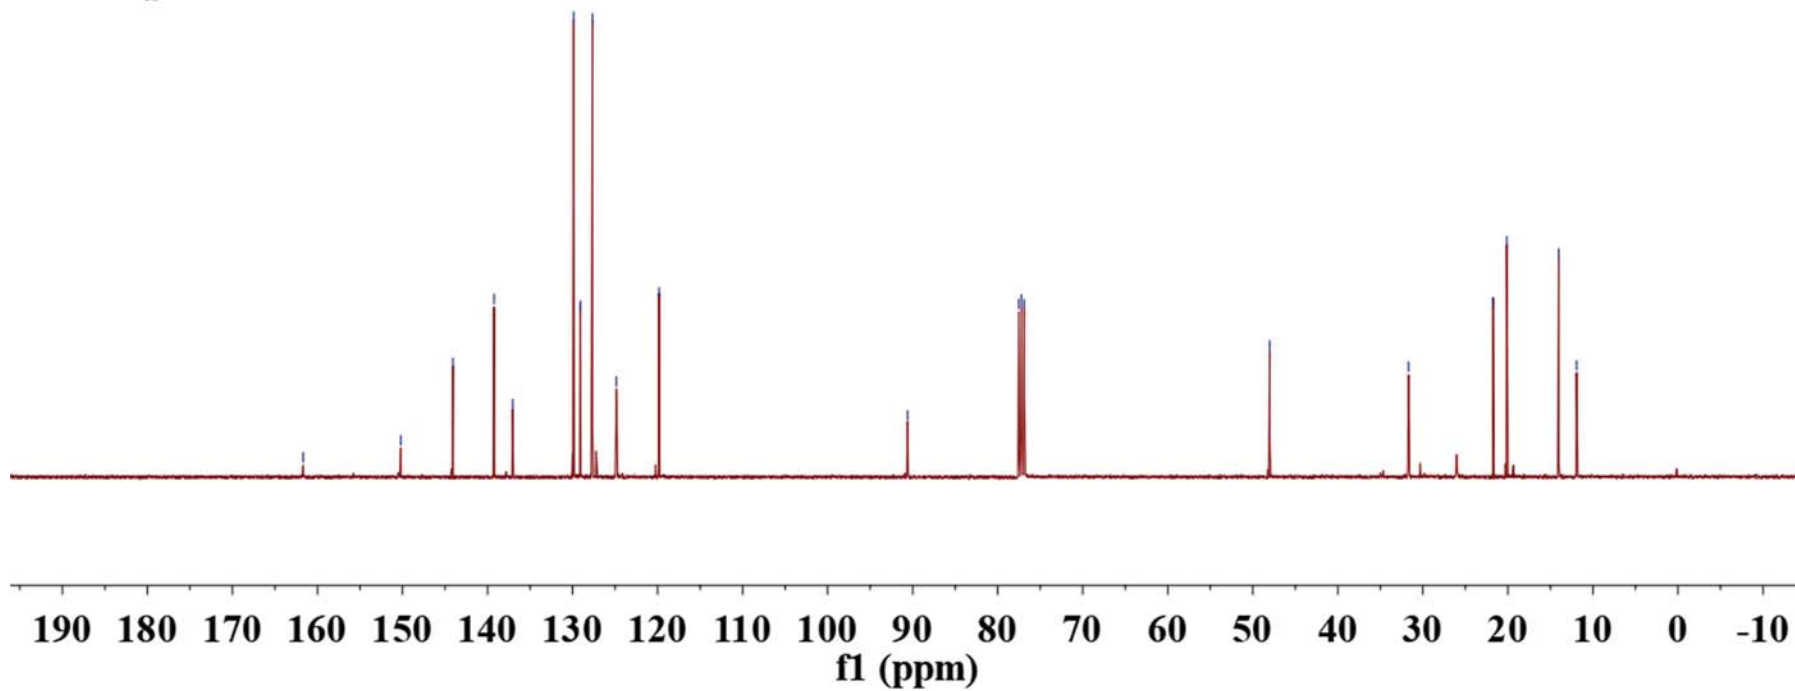

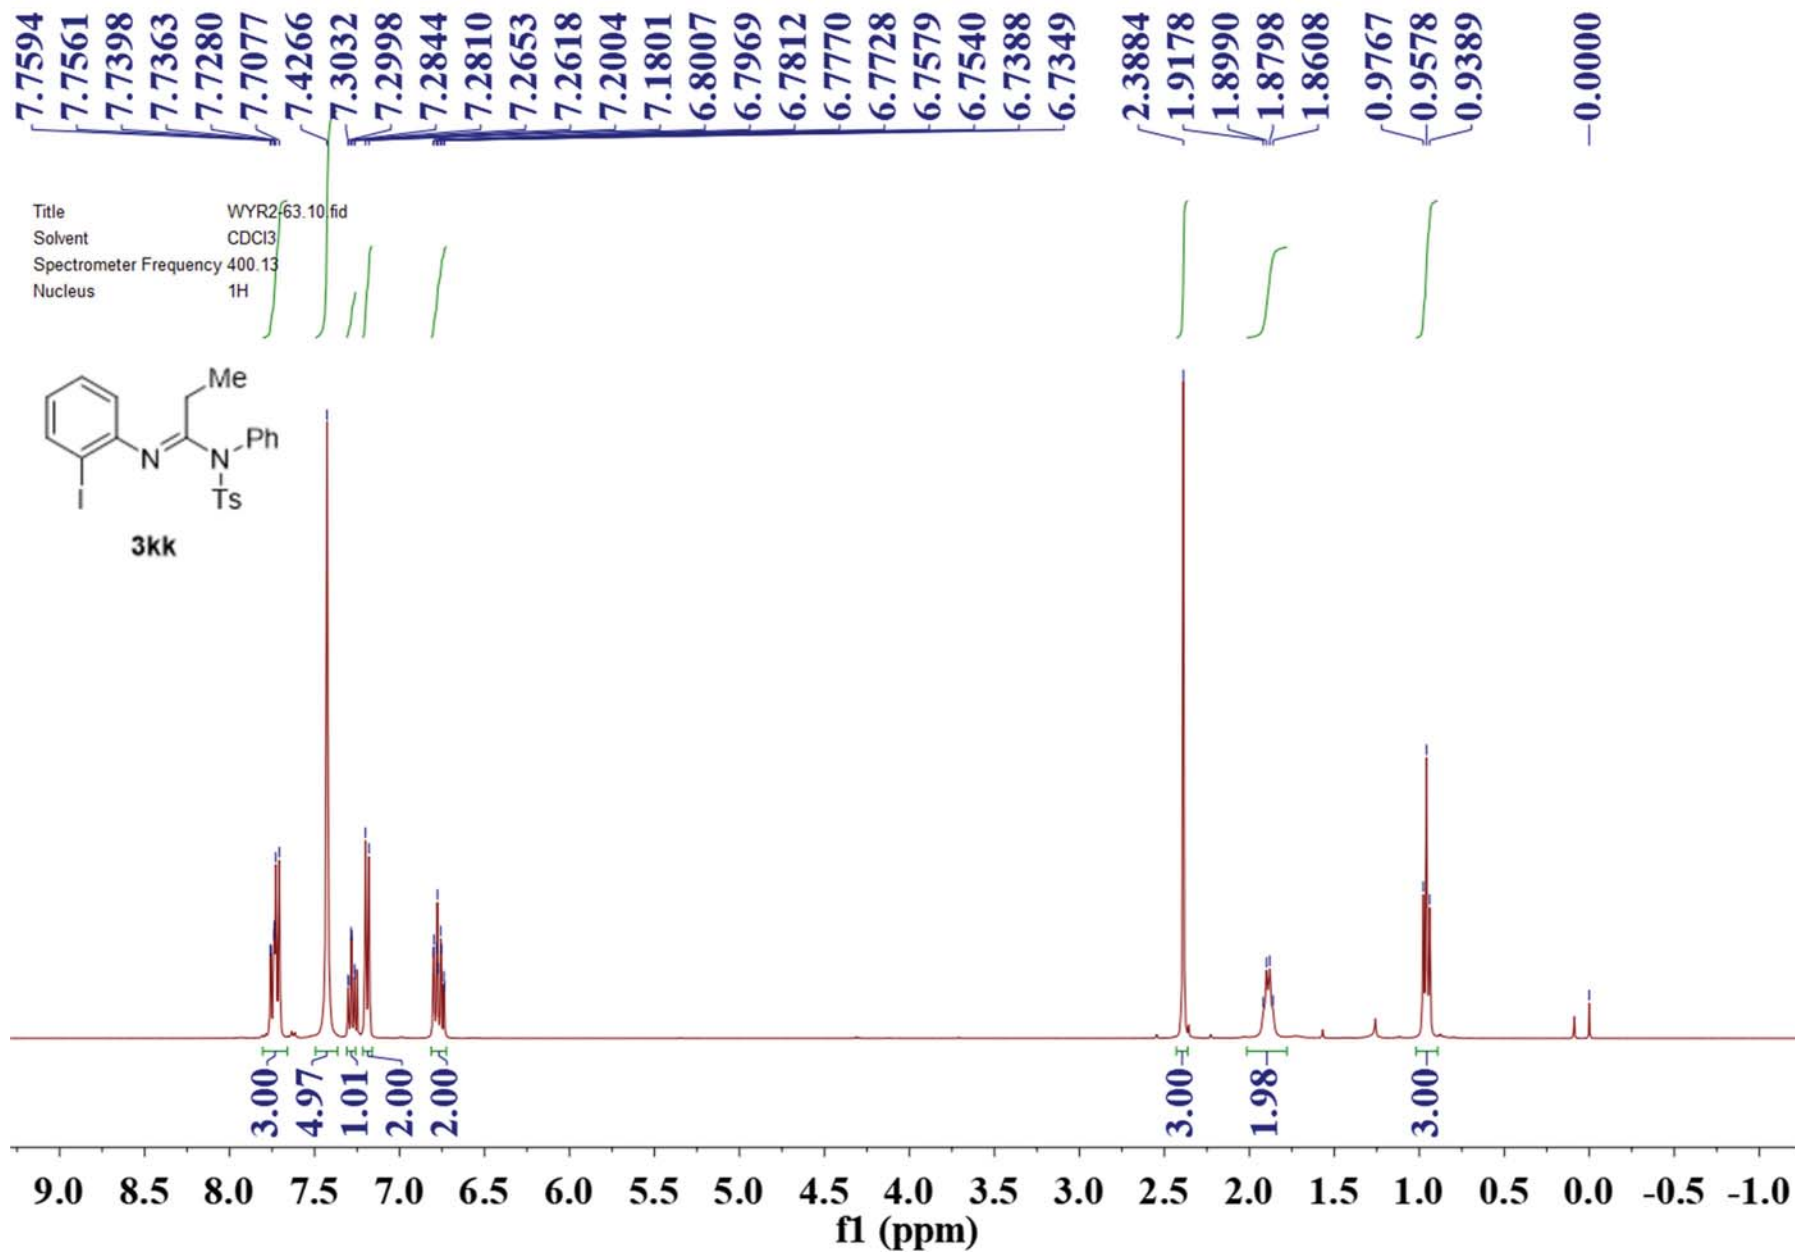

160.001  
150.143  
143.807  
138.861  
137.442  
136.425  
130.685  
129.984  
129.332  
129.288  
129.077  
128.928  
124.846  
119.745

-90.302  
77.518  
77.200  
76.882

24.599  
21.787  
11.382

Title WYR2-63.10.fid  
Solvent CDCl3  
Spectrometer Frequency 100.62  
Nucleus 13C

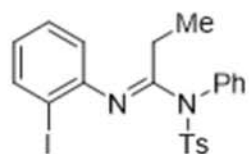

3kk

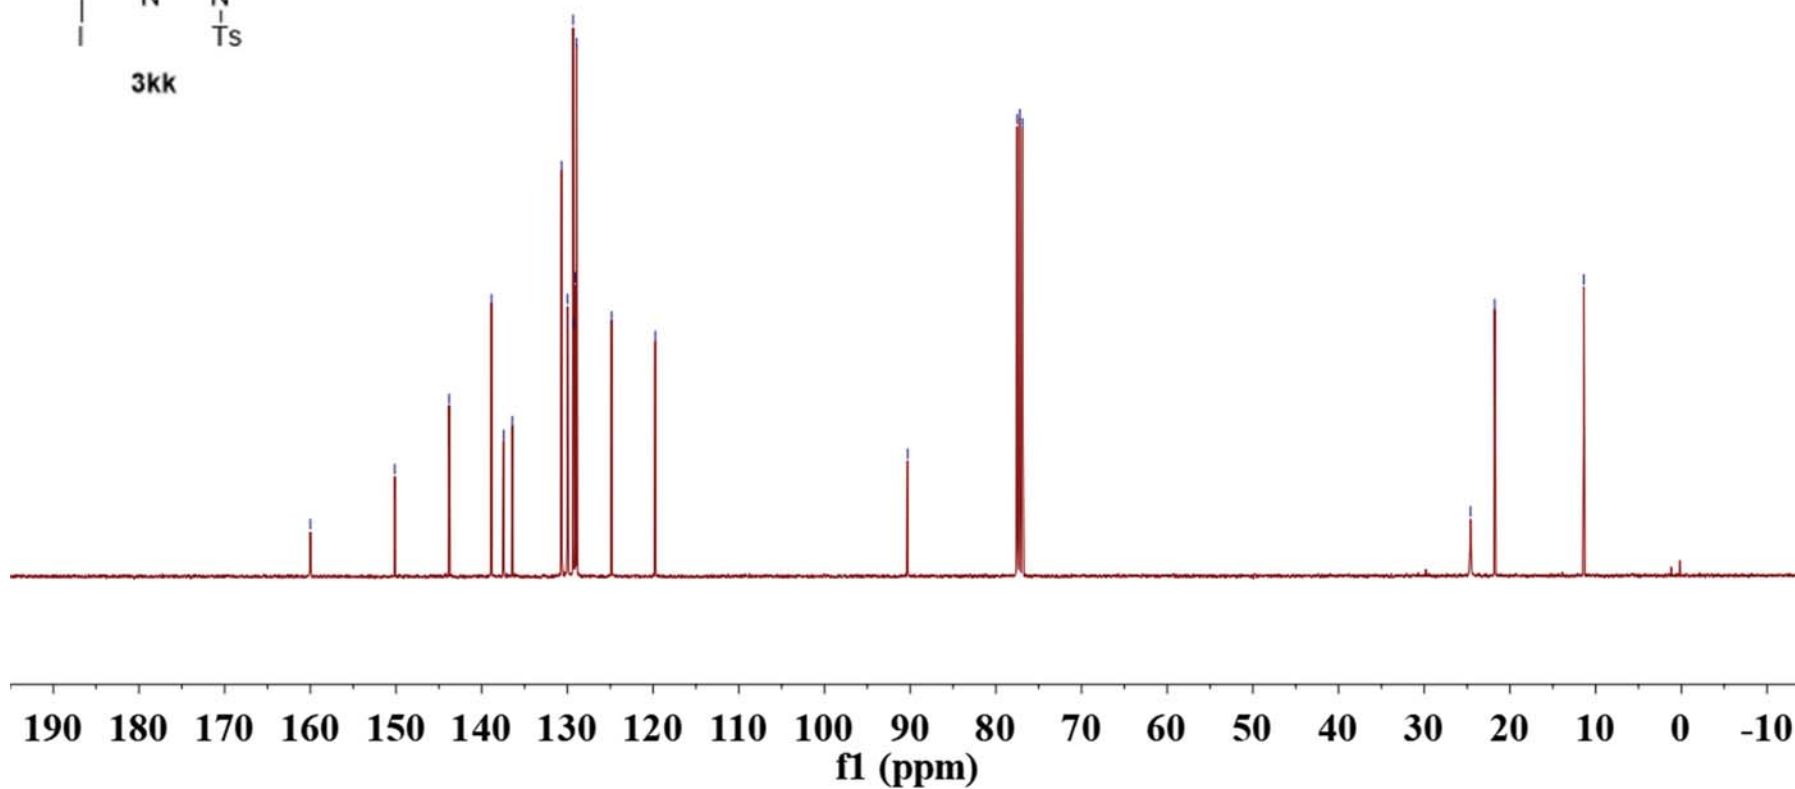

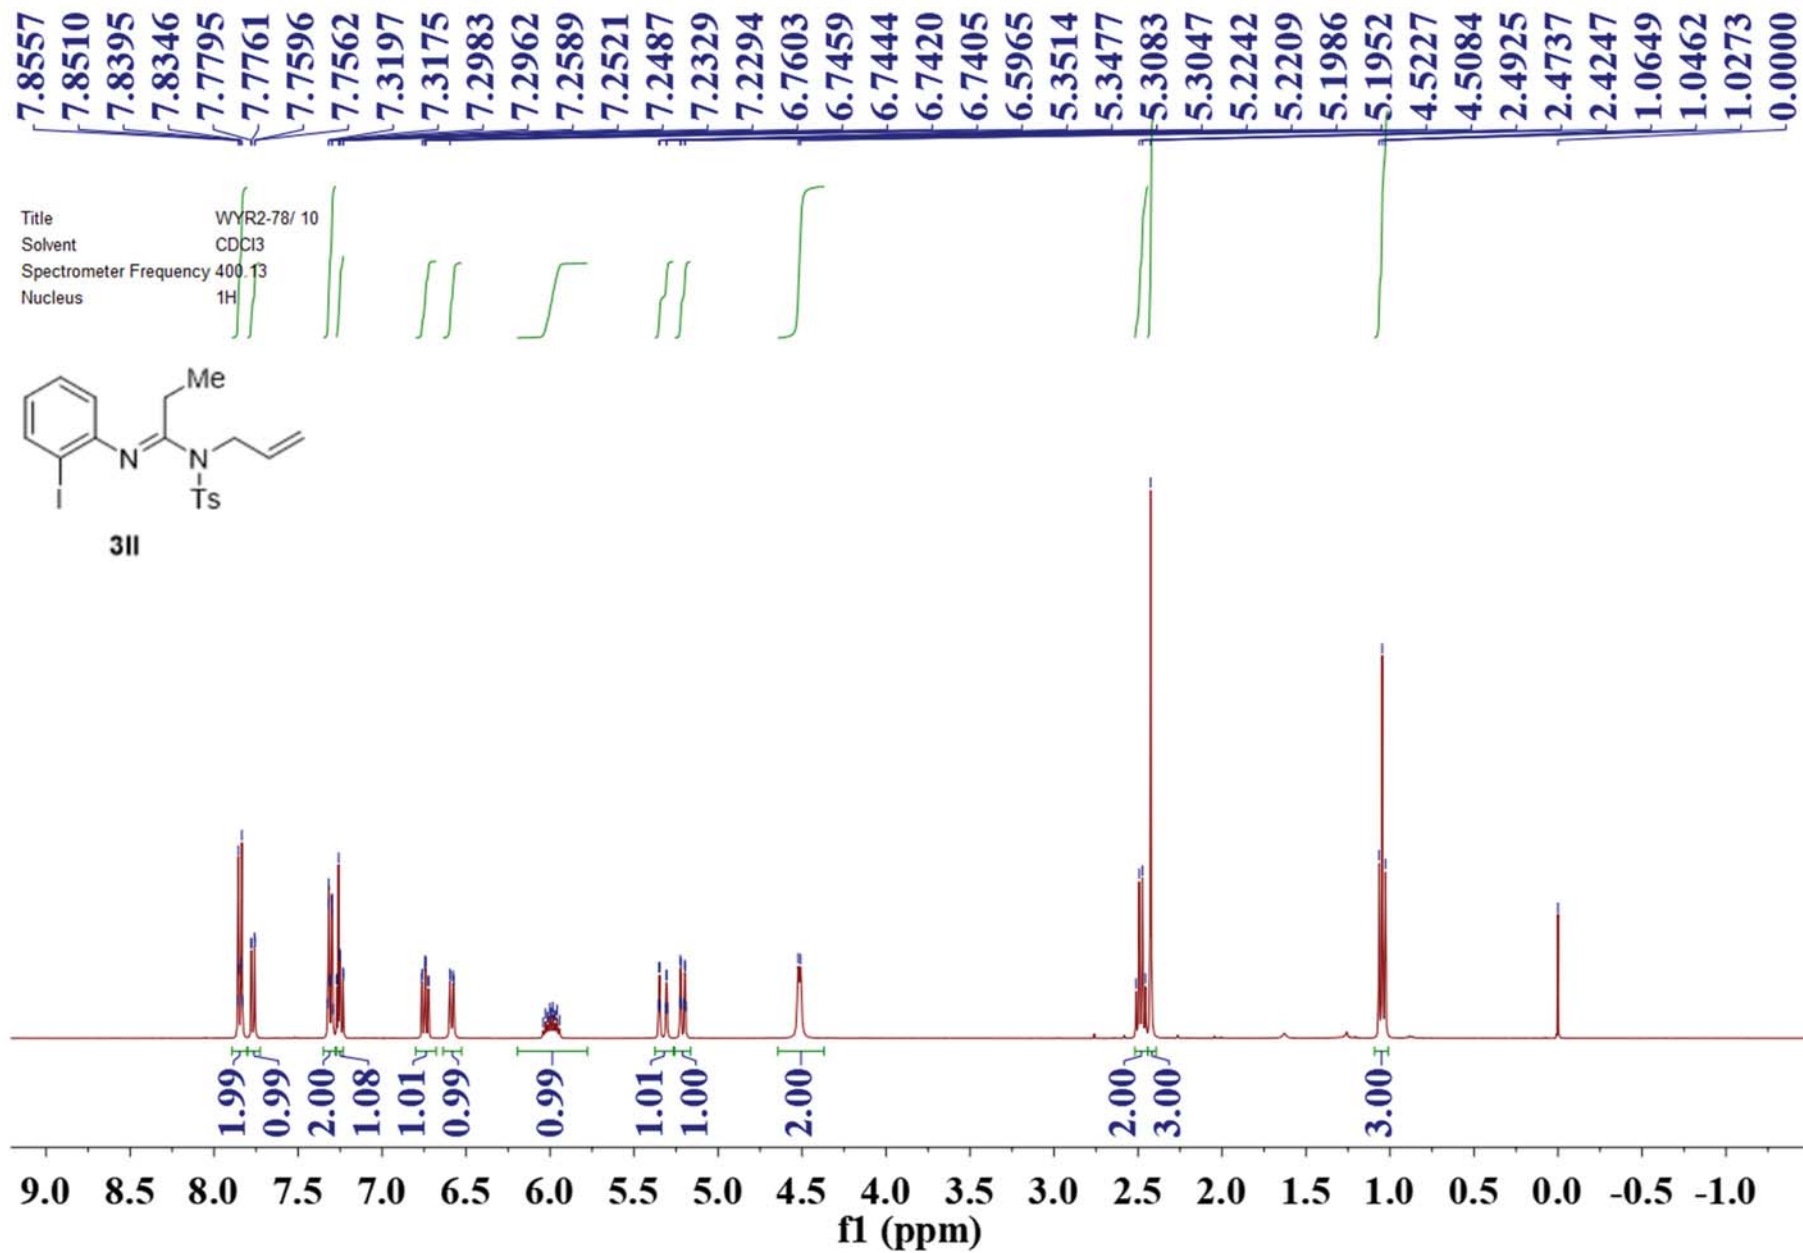



-160.920  
 -150.100  
 -144.203  
 -139.139  
 -137.170  
 -133.766  
 -129.810  
 -129.051  
 -128.046  
 -124.788  
 -119.991  
 -118.394  
 -90.537  
 77.518  
 77.200  
 76.882  
 -50.187  
 25.469  
 21.768  
 11.813

Title WYR2-78.10.fid  
 Solvent CDCl3  
 Spectrometer Frequency 100.62  
 Nucleus 13C

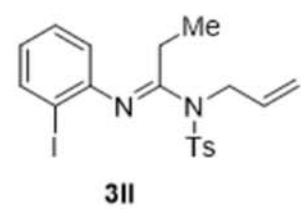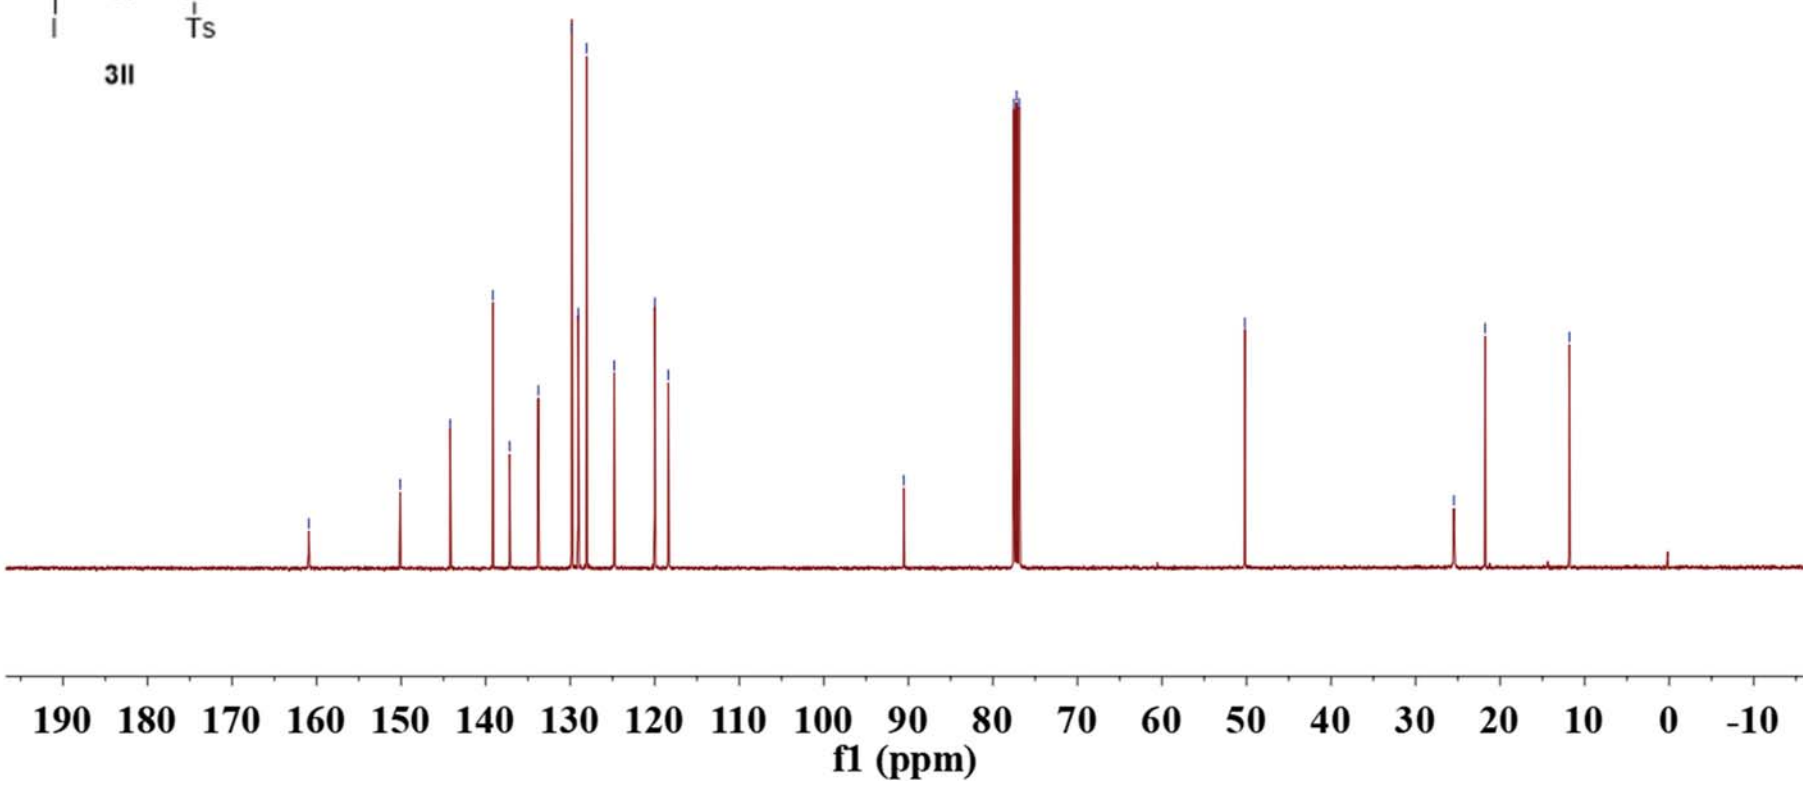

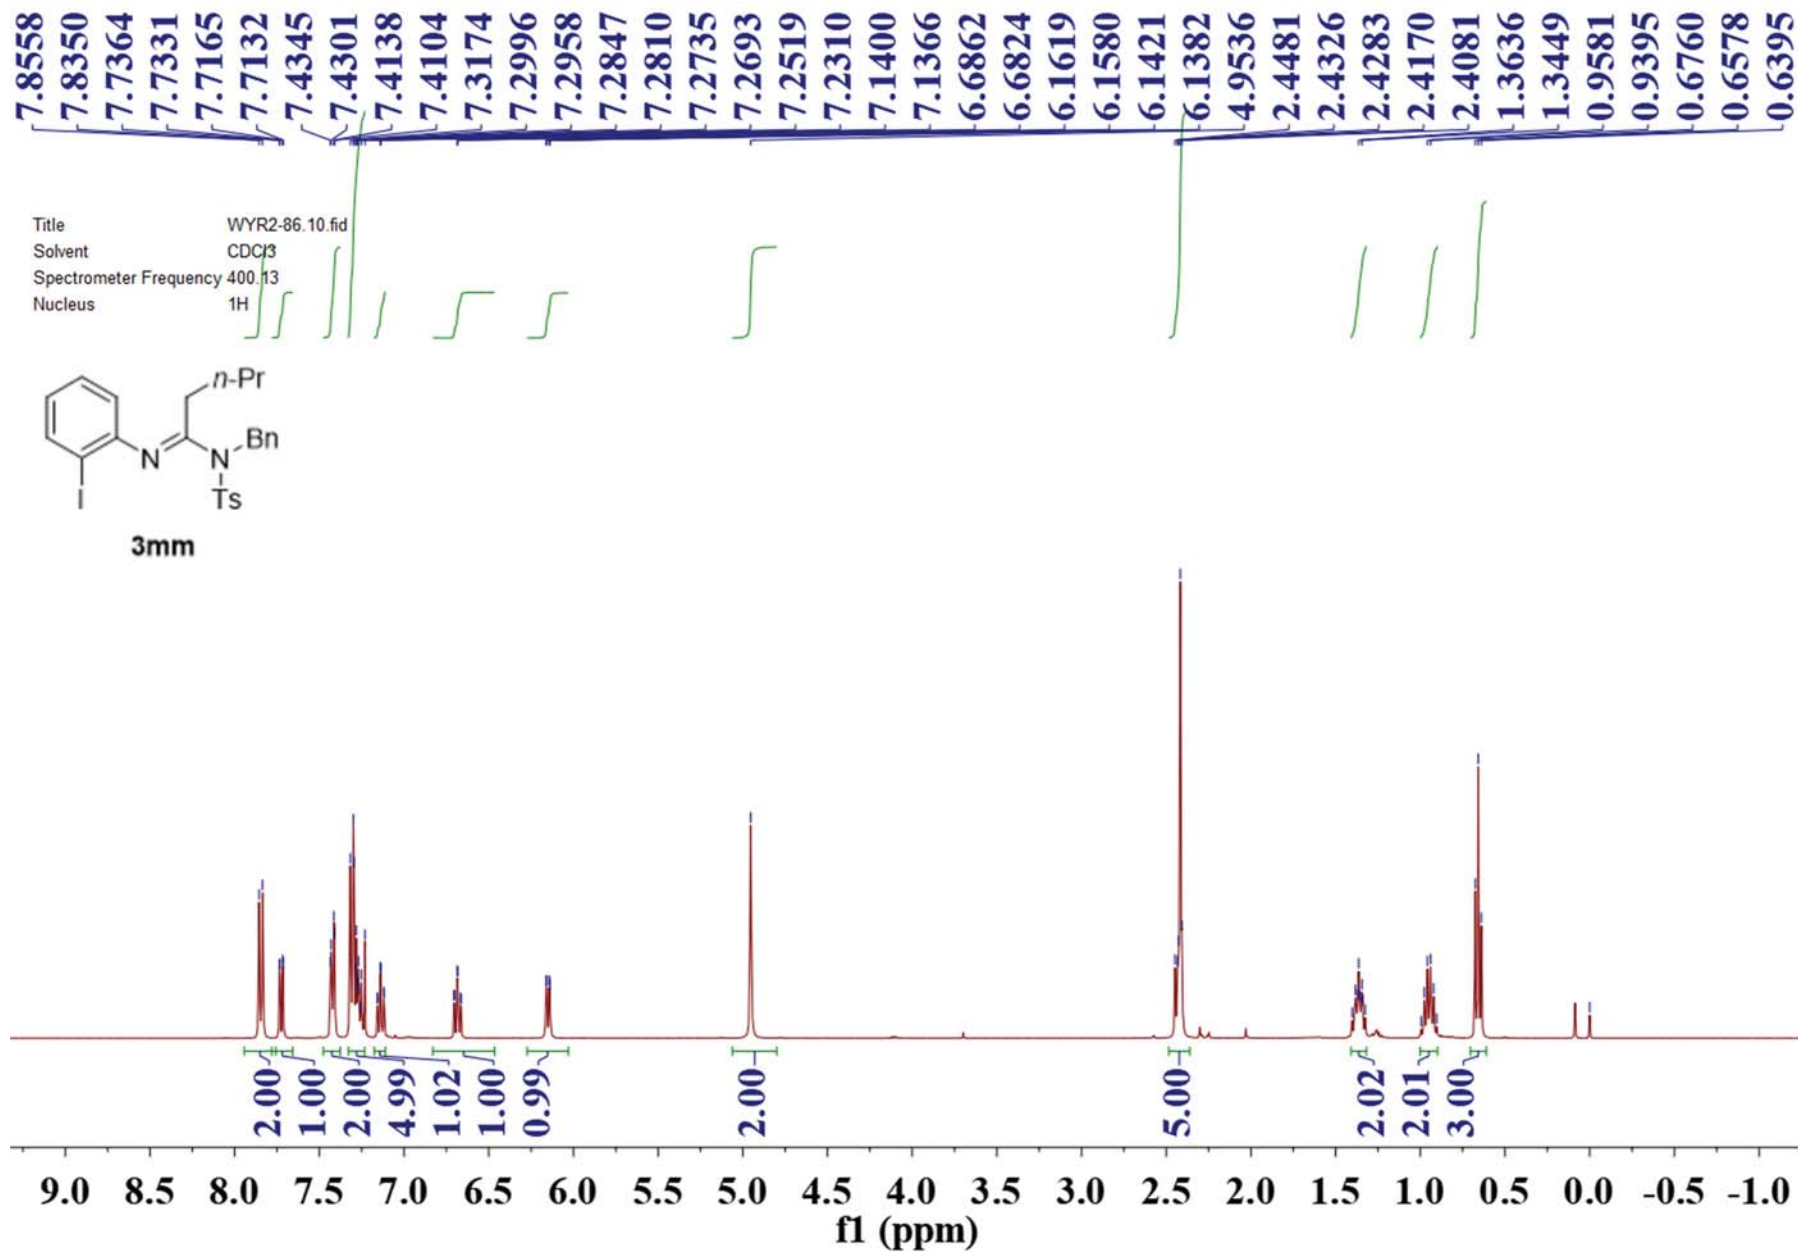

160.040  
 149.988  
 144.251  
 138.999  
 137.072  
 136.778  
 129.915  
 128.998  
 128.876  
 128.274  
 127.961  
 127.541  
 124.679  
 119.901

-90.066  
 77.518  
 77.200  
 76.882

-51.173

~32.369  
 ~29.072  
 ~22.435  
 ~21.734  
 ~13.615

Title WYR2-86.10.fid  
 Solvent CDCl3  
 Spectrometer Frequency 100.62  
 Nucleus 13C

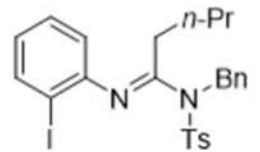

3mm

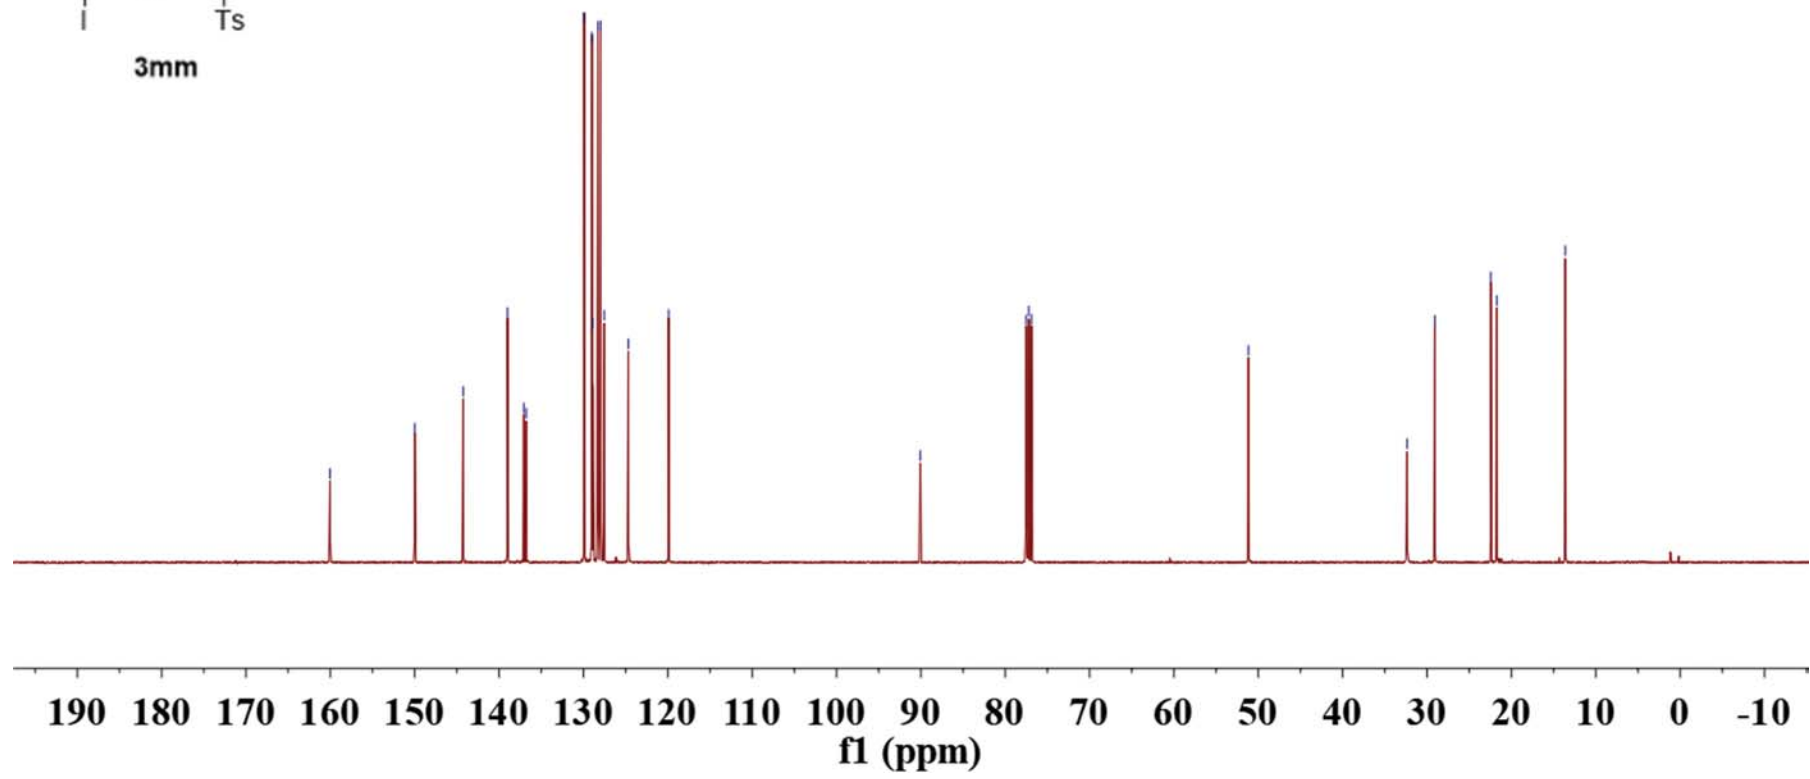

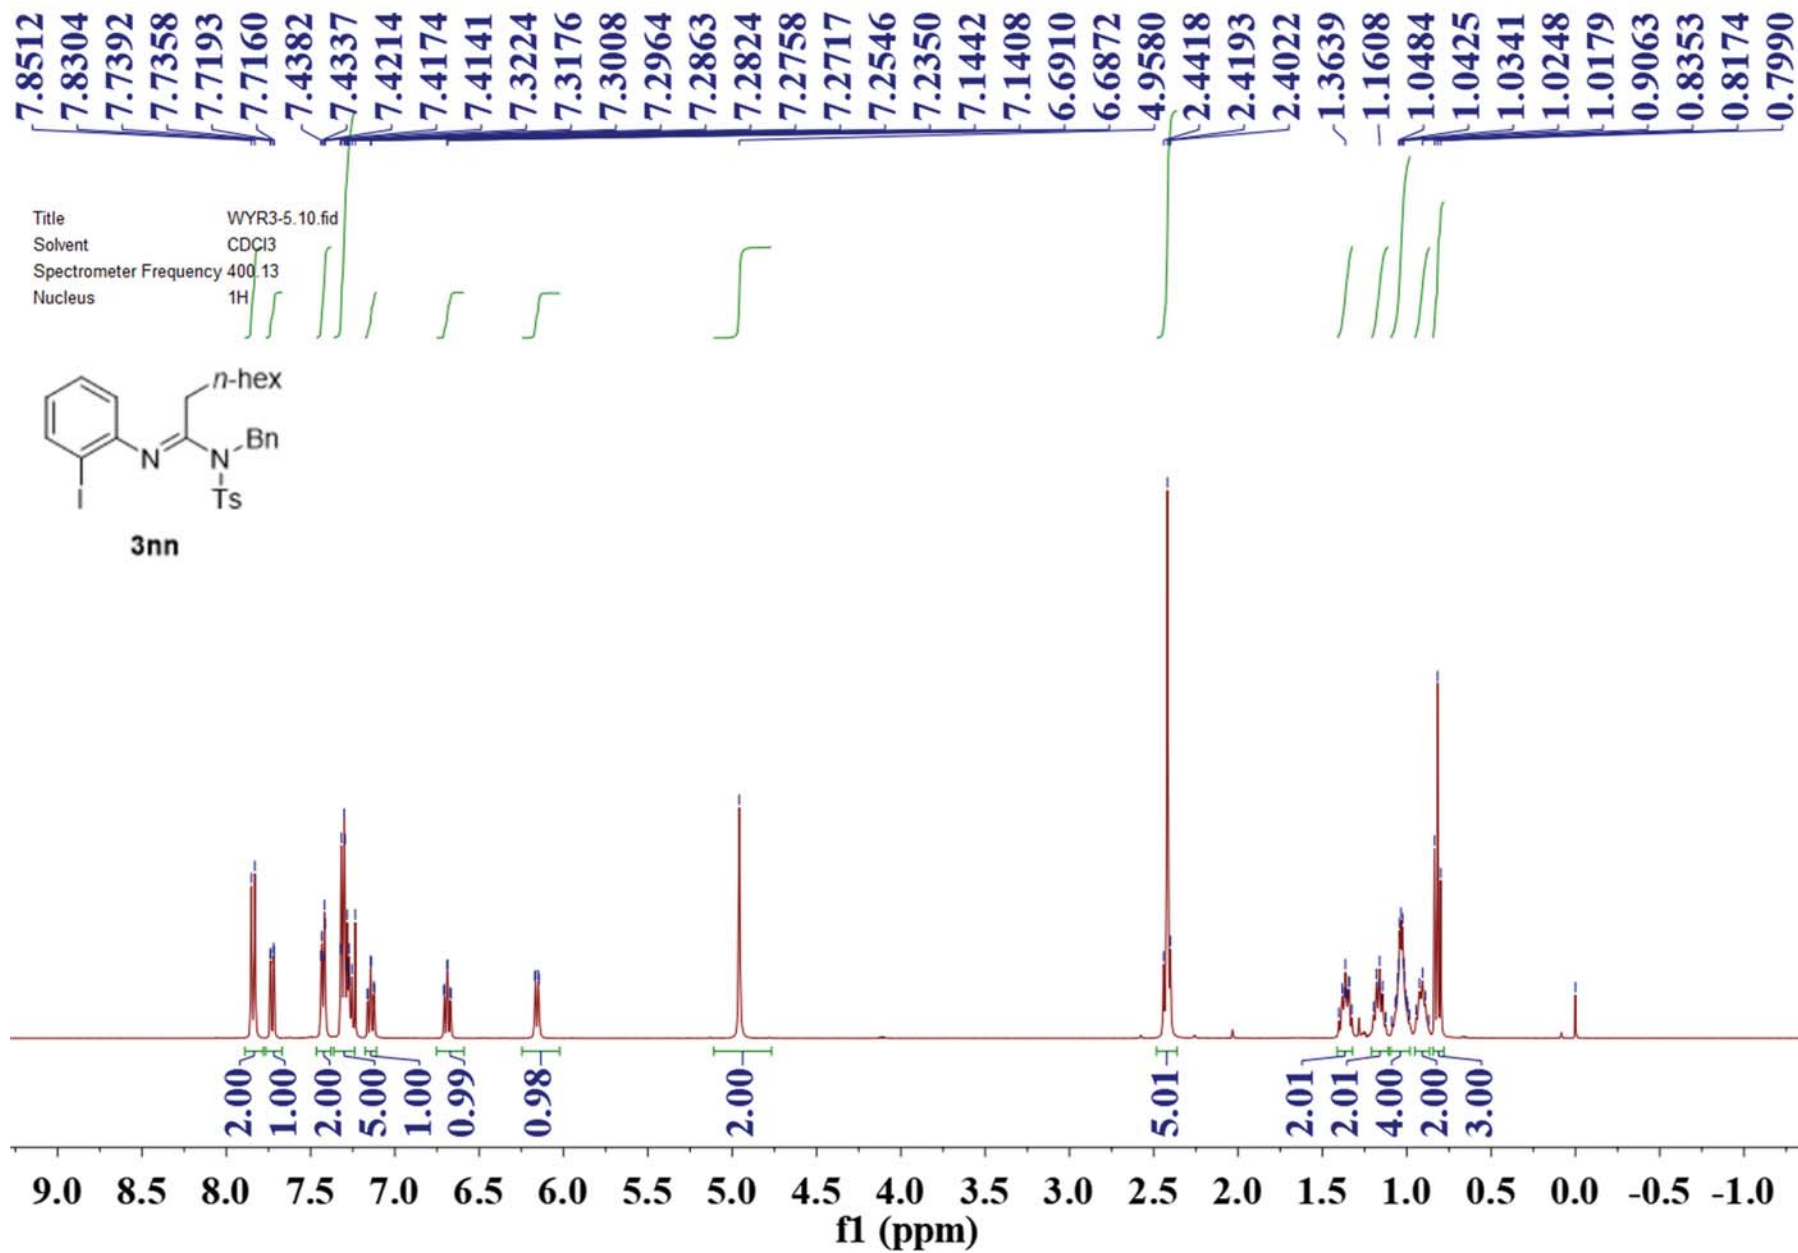

160.118  
150.017  
144.247  
139.022  
137.116  
136.827  
129.919  
129.033  
128.872  
128.290  
127.973  
127.555  
124.683  
119.932

-90.113  
77.518  
77.200  
76.882

-51.182  
32.577  
31.560  
29.262  
28.693  
26.938  
22.669  
21.743  
14.212

Title WYR3-5.10.fid  
Solvent CDCl3  
Spectrometer Frequency 100.62  
Nucleus 13C

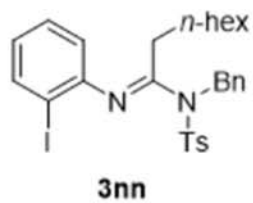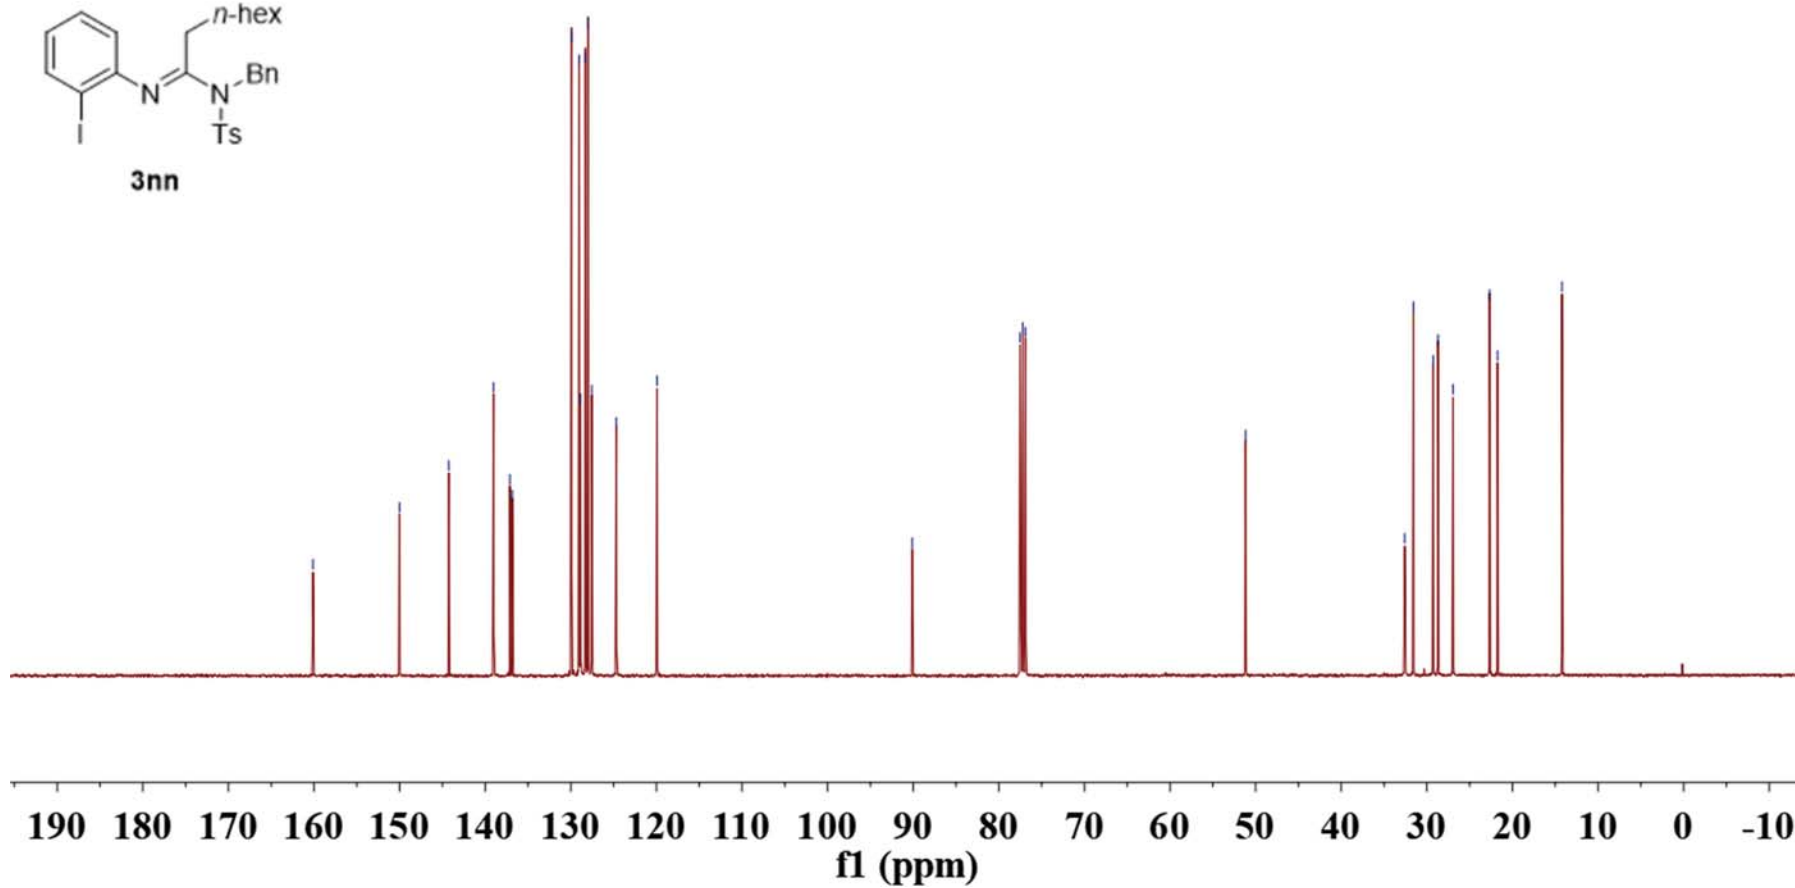

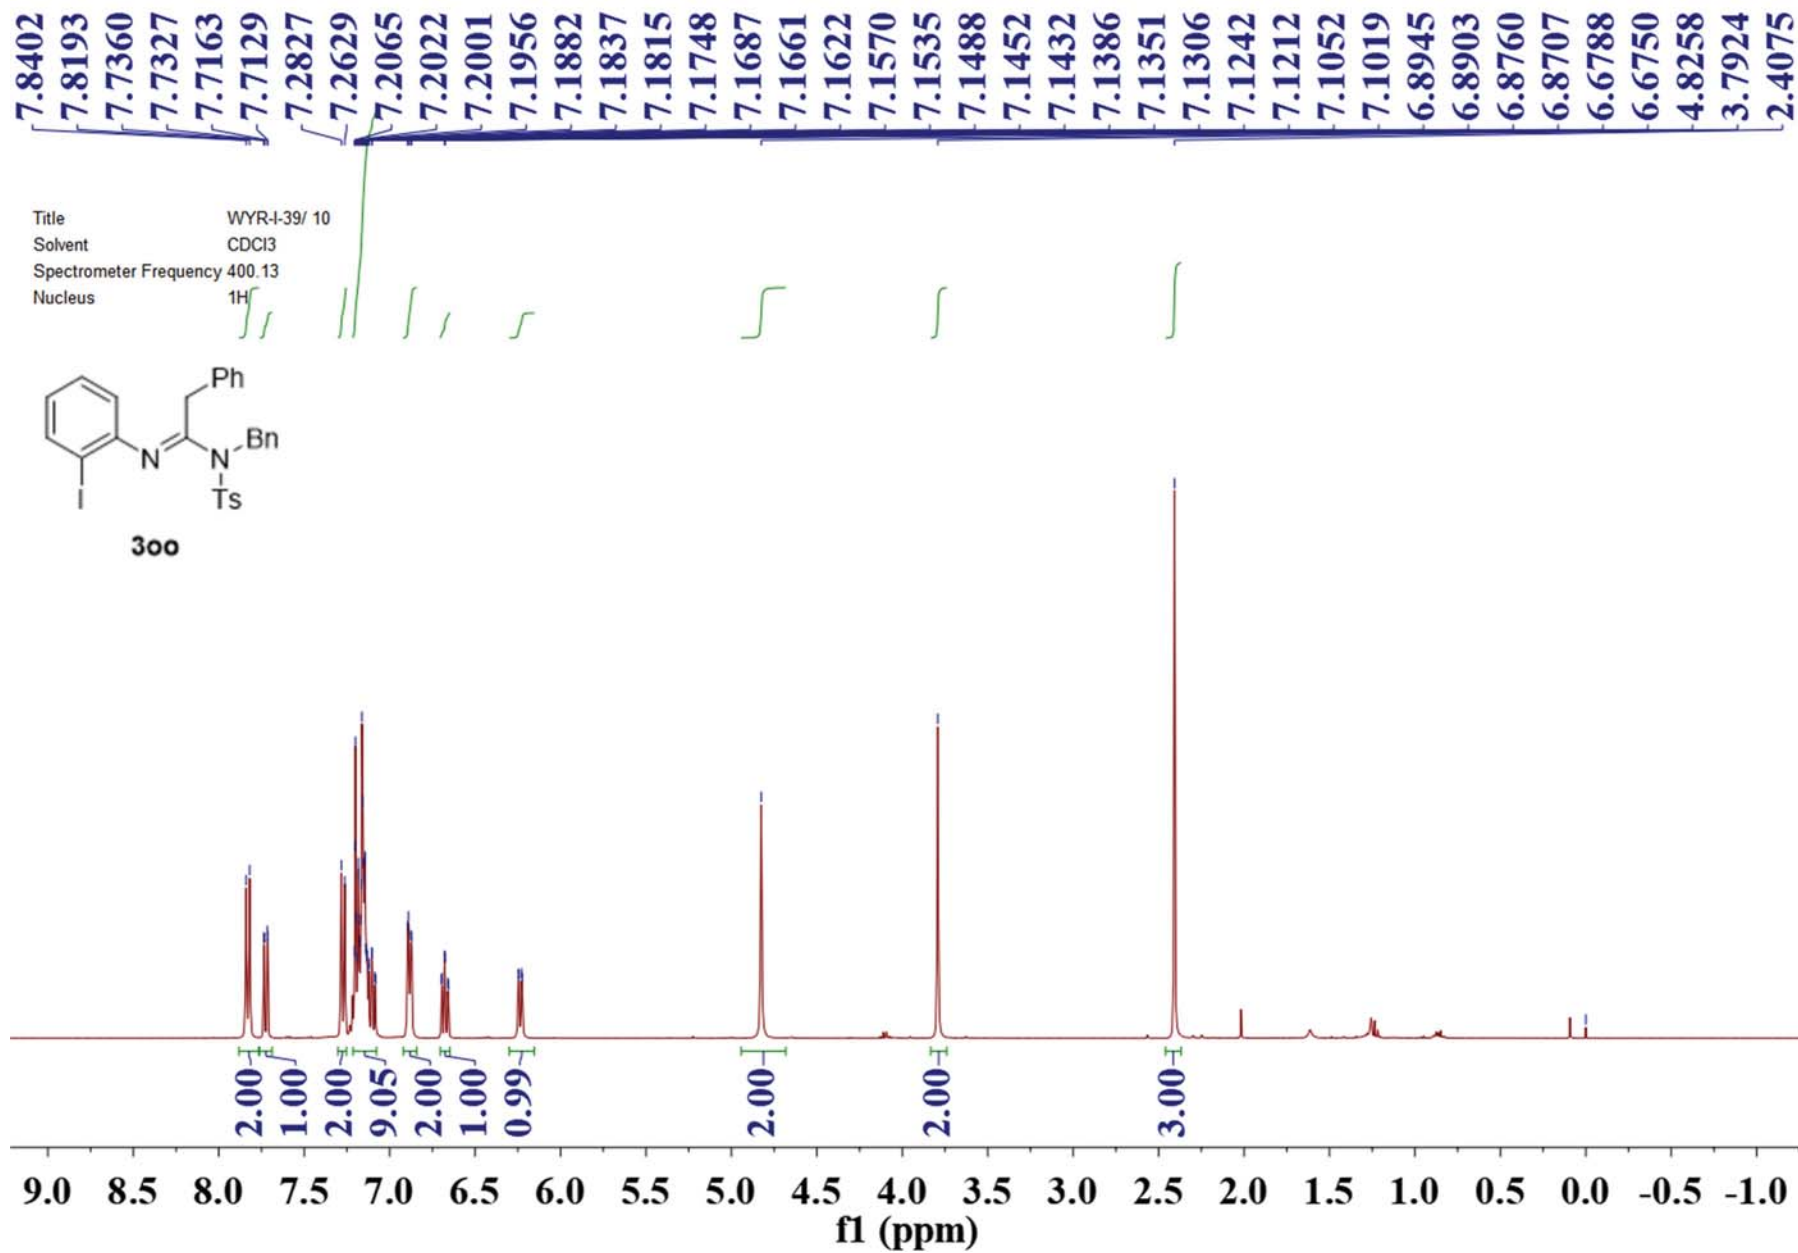

156.703  
 149.621  
 144.281  
 139.079  
 136.469  
 136.356  
 134.680  
 129.656  
 129.032  
 128.926  
 128.571  
 128.562  
 128.549  
 128.275  
 127.450  
 126.786  
 125.004  
 120.192  
 -90.297  
 77.518  
 77.200  
 76.883  
 -50.987  
 -38.192  
 -21.743

Title WYR-I-39.10.fid  
 Solvent CDCl3  
 Spectrometer Frequency 100.62  
 Nucleus 13C

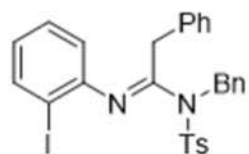

300

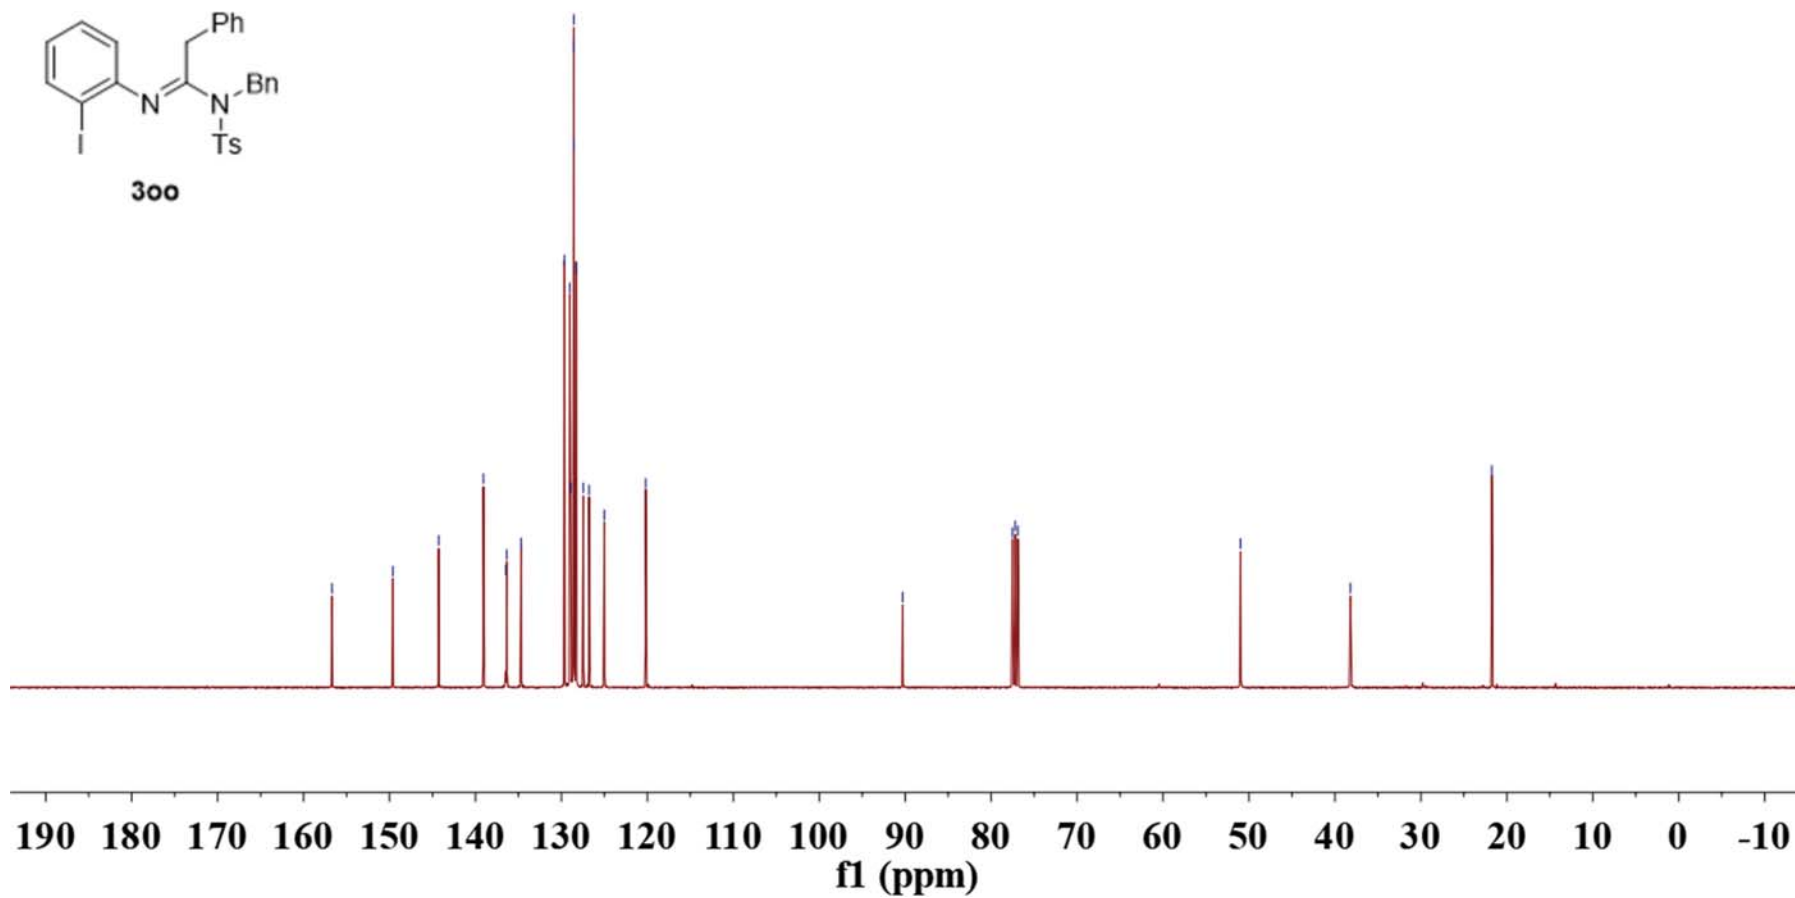

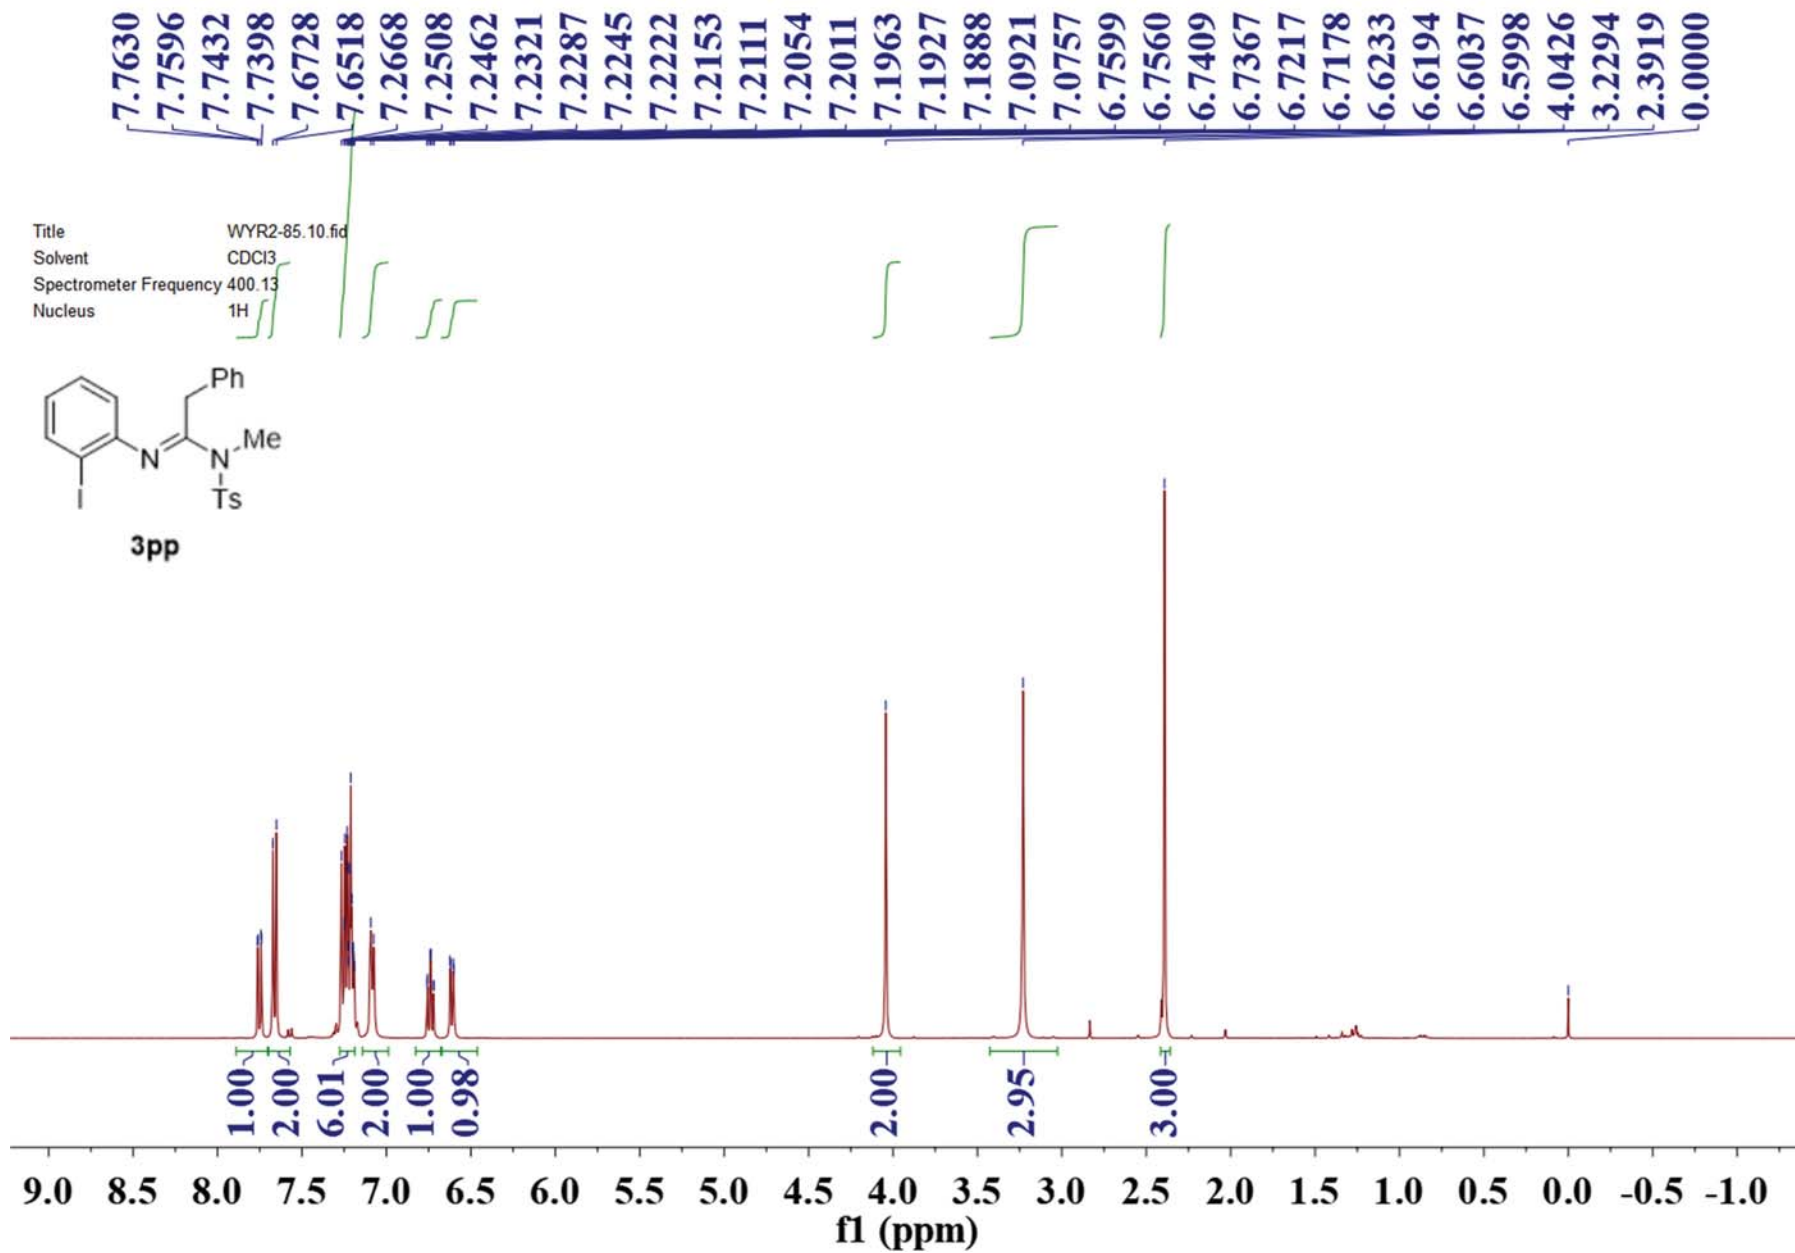



158.642  
 149.376  
 144.316  
 139.060  
 135.337  
 135.280  
 129.754  
 129.021  
 129.002  
 128.638  
 127.890  
 126.789  
 125.241  
 120.188

-91.471  
 77.518  
 77.200  
 76.882

37.857  
 36.358  
 -21.707

Title WYR2-85/ 10  
 Solvent CDCl3  
 Spectrometer Frequency 100.62  
 Nucleus 13C

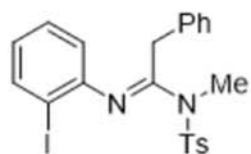

3pp

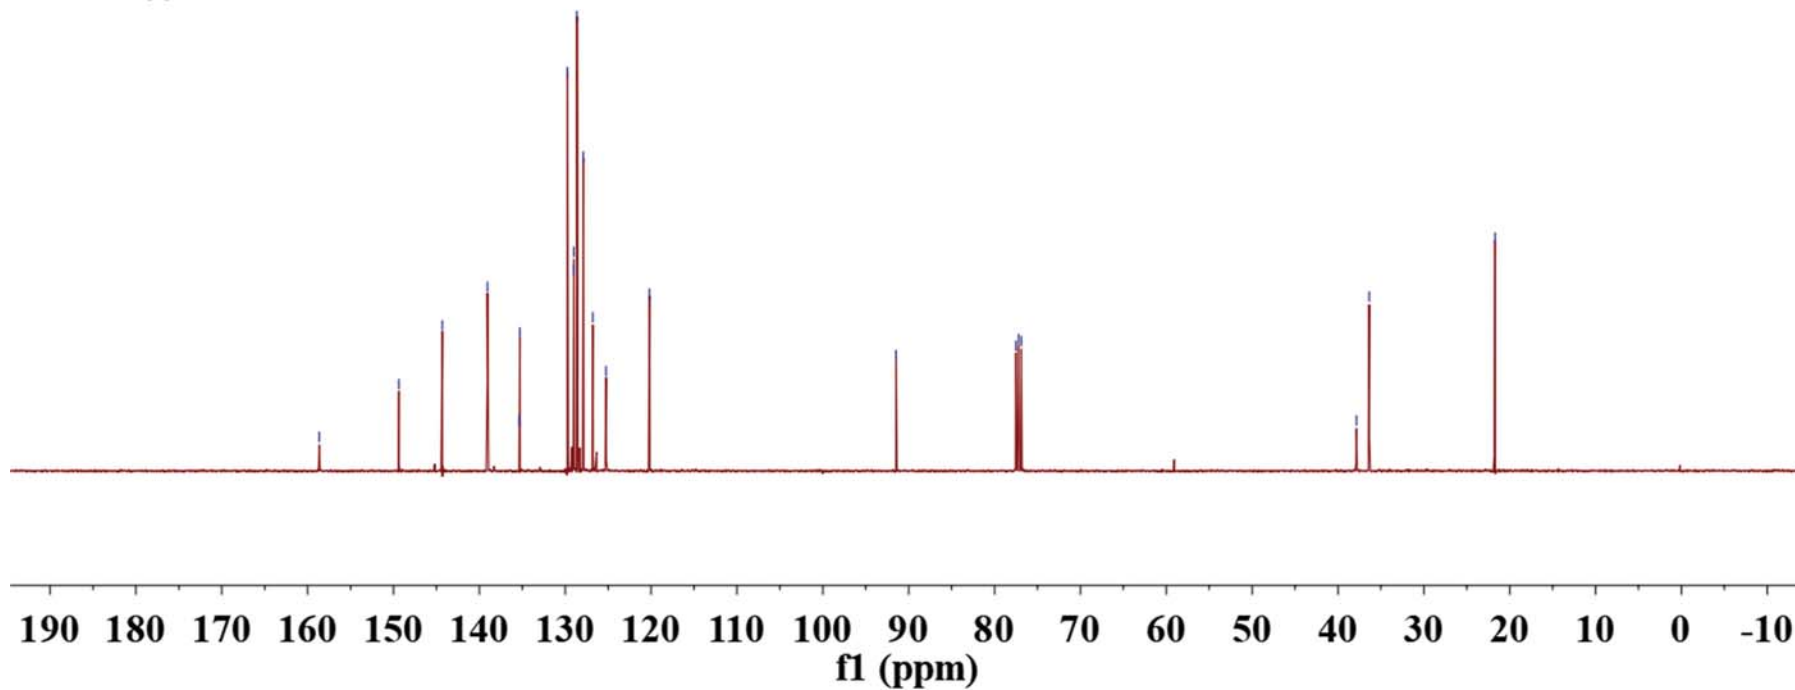

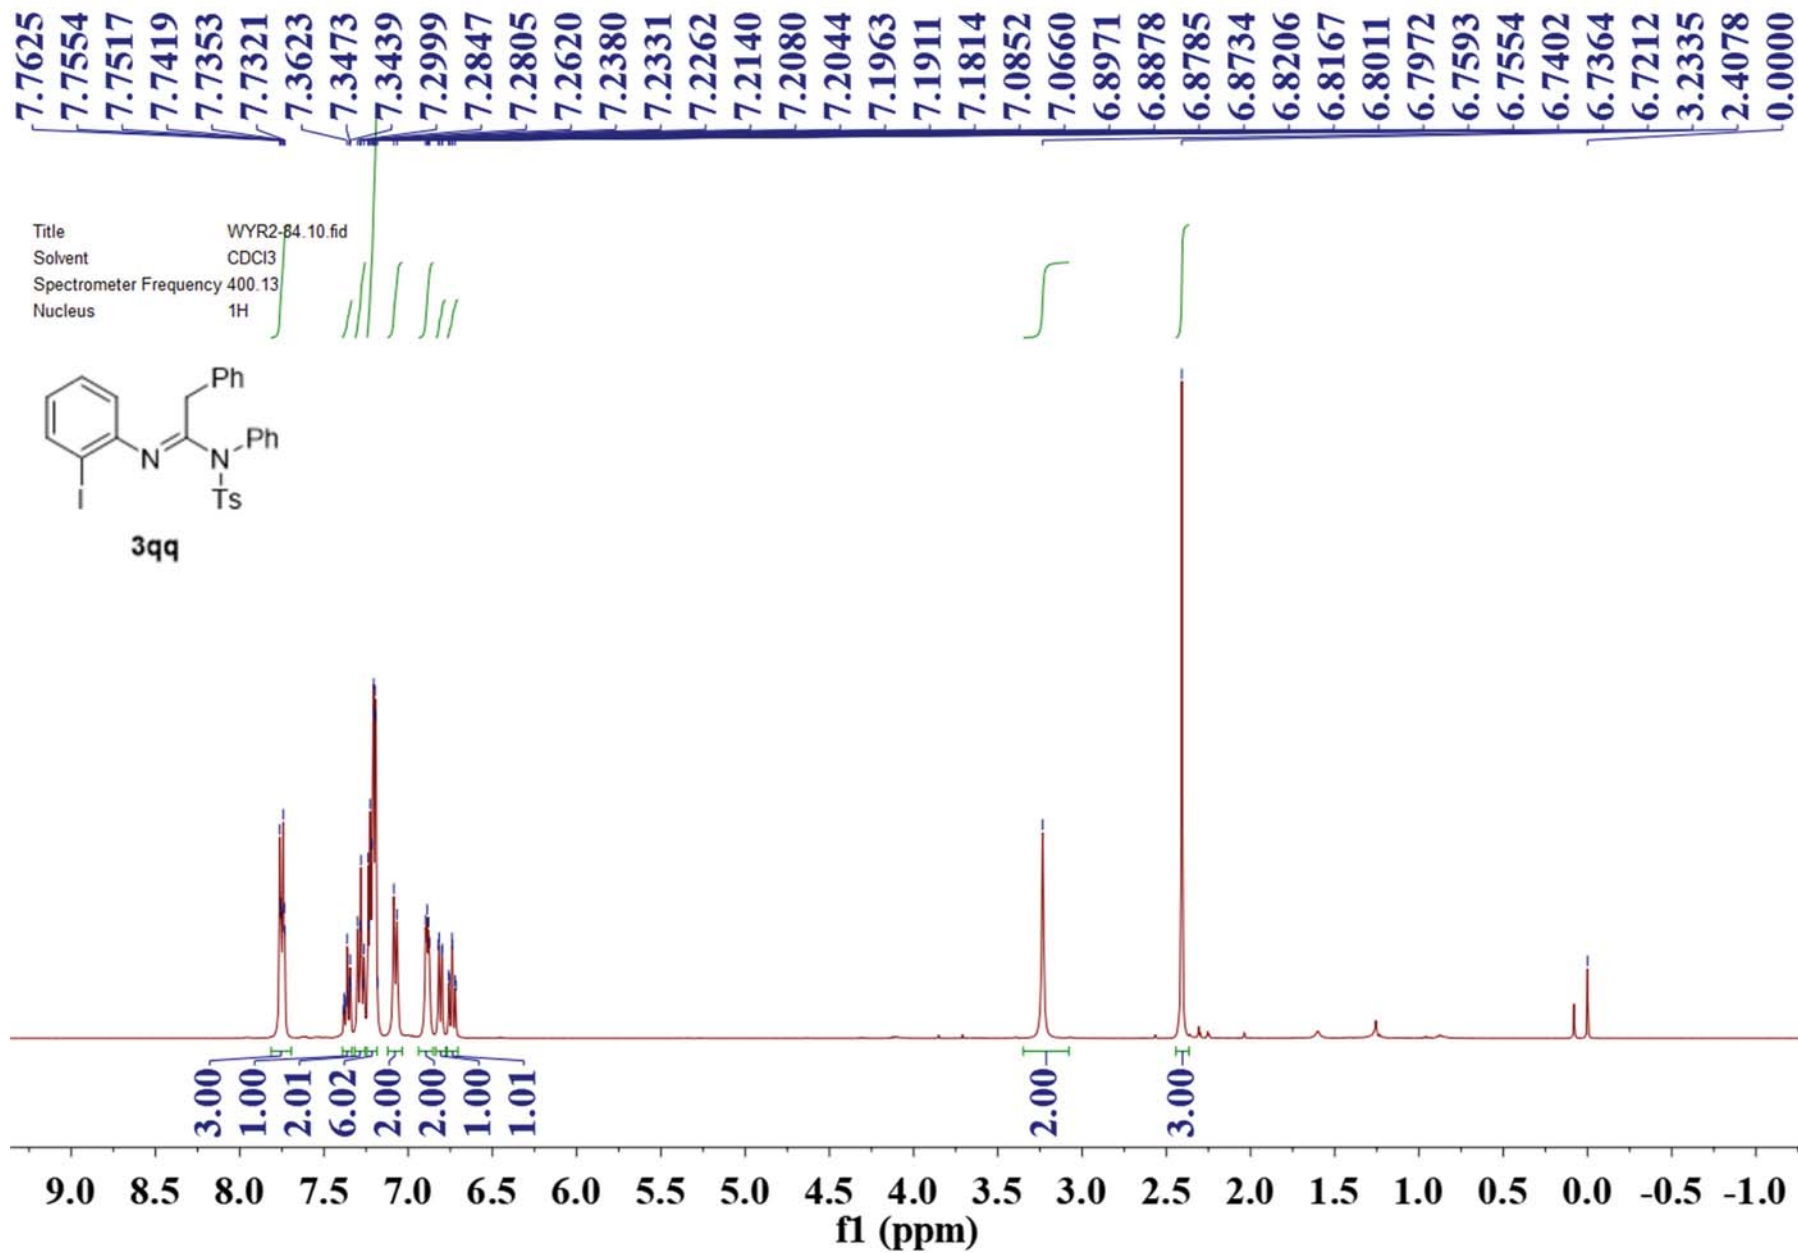

156.220  
 149.880  
 143.947  
 138.852  
 136.914  
 136.540  
 134.588  
 131.082  
 130.079  
 129.295  
 129.139  
 128.966  
 128.719  
 128.578  
 126.879  
 125.090  
 119.917  
 -90.502  
 77.518  
 77.200  
 76.882  
 -37.121  
 -21.819

Title WYR2-84.10.fid  
 Solvent CDCl3  
 Spectrometer Frequency 100.62  
 Nucleus 13C

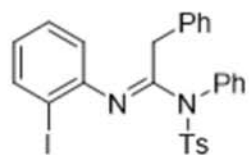

3qq

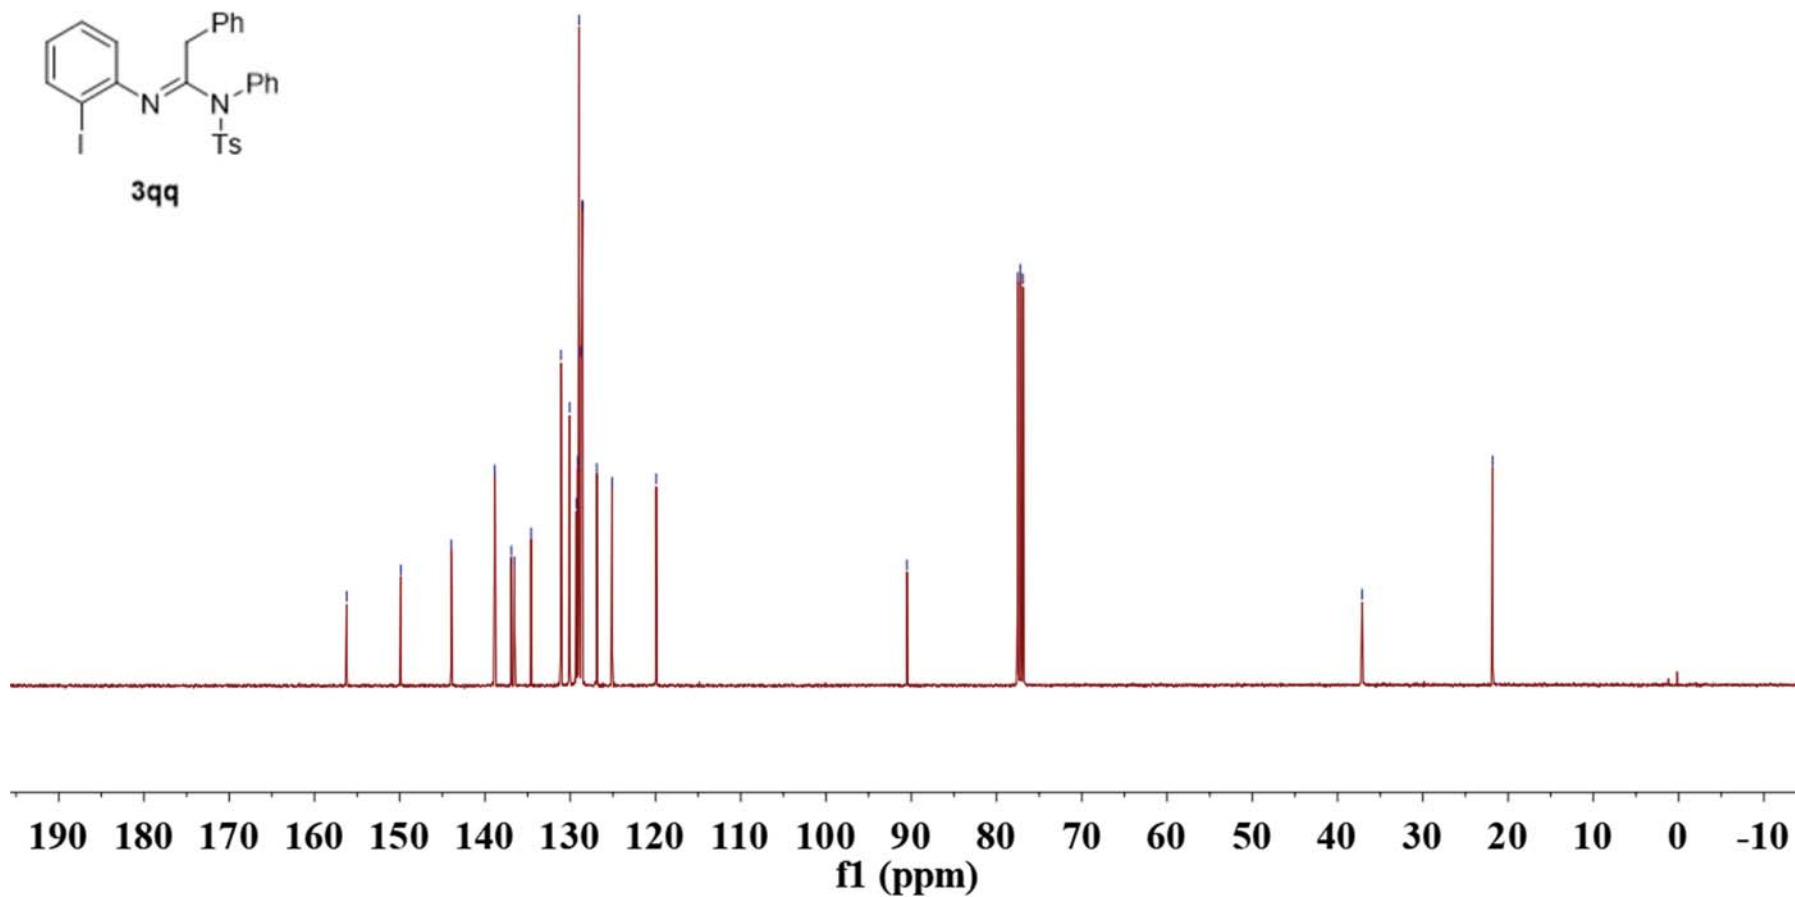

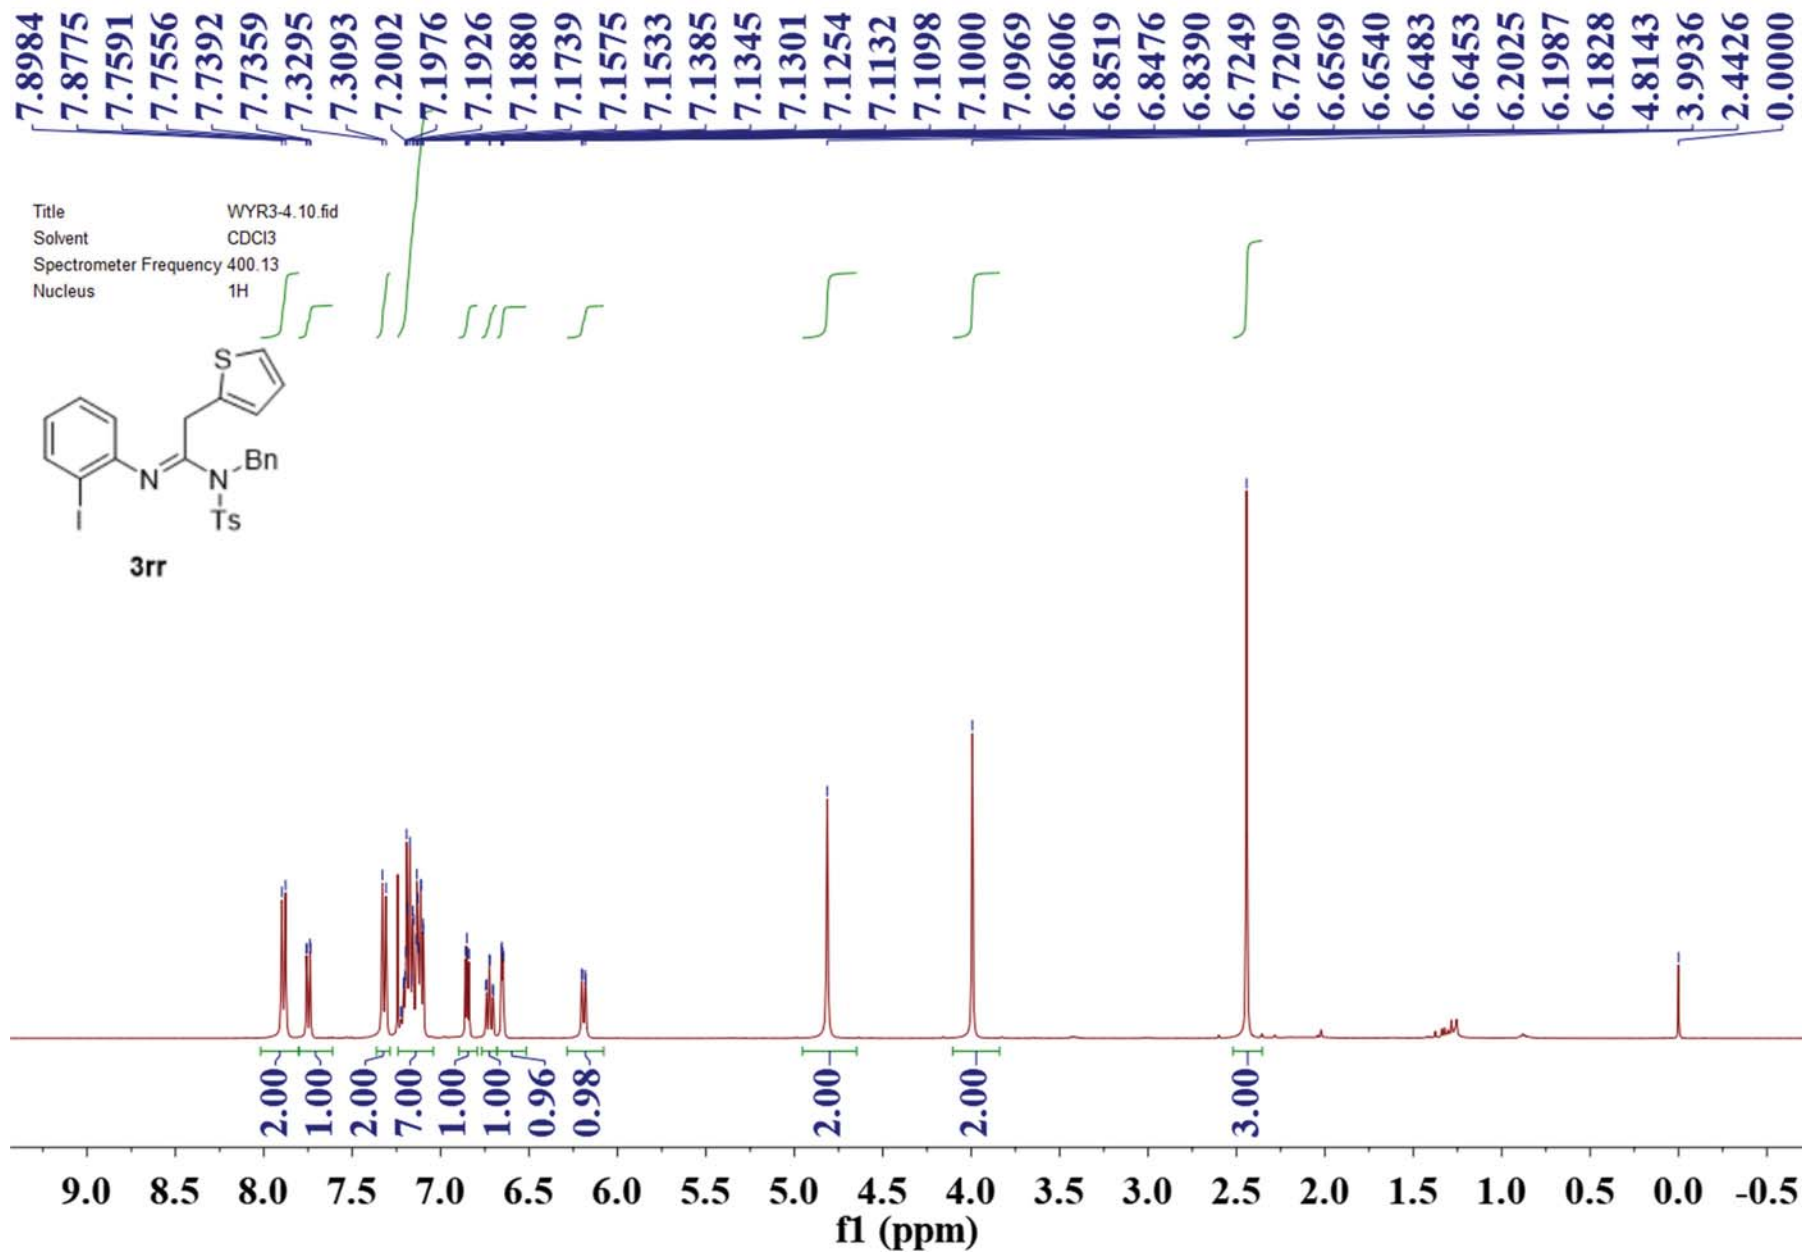

155.900  
 149.482  
 144.454  
 139.118  
 136.286  
 136.243  
 135.673  
 129.864  
 129.064  
 128.511  
 128.292  
 127.462  
 127.449  
 126.937  
 125.187  
 124.828  
 120.265  
 -90.045  
 77.518  
 77.200  
 76.882  
 -51.337  
 -32.954  
 -21.825

Title WYR3-4.10.fid  
 Solvent CDCl3  
 Spectrometer Frequency 100.62  
 Nucleus 13C

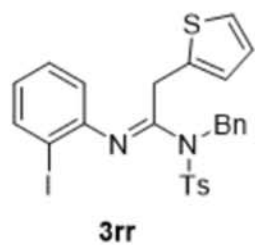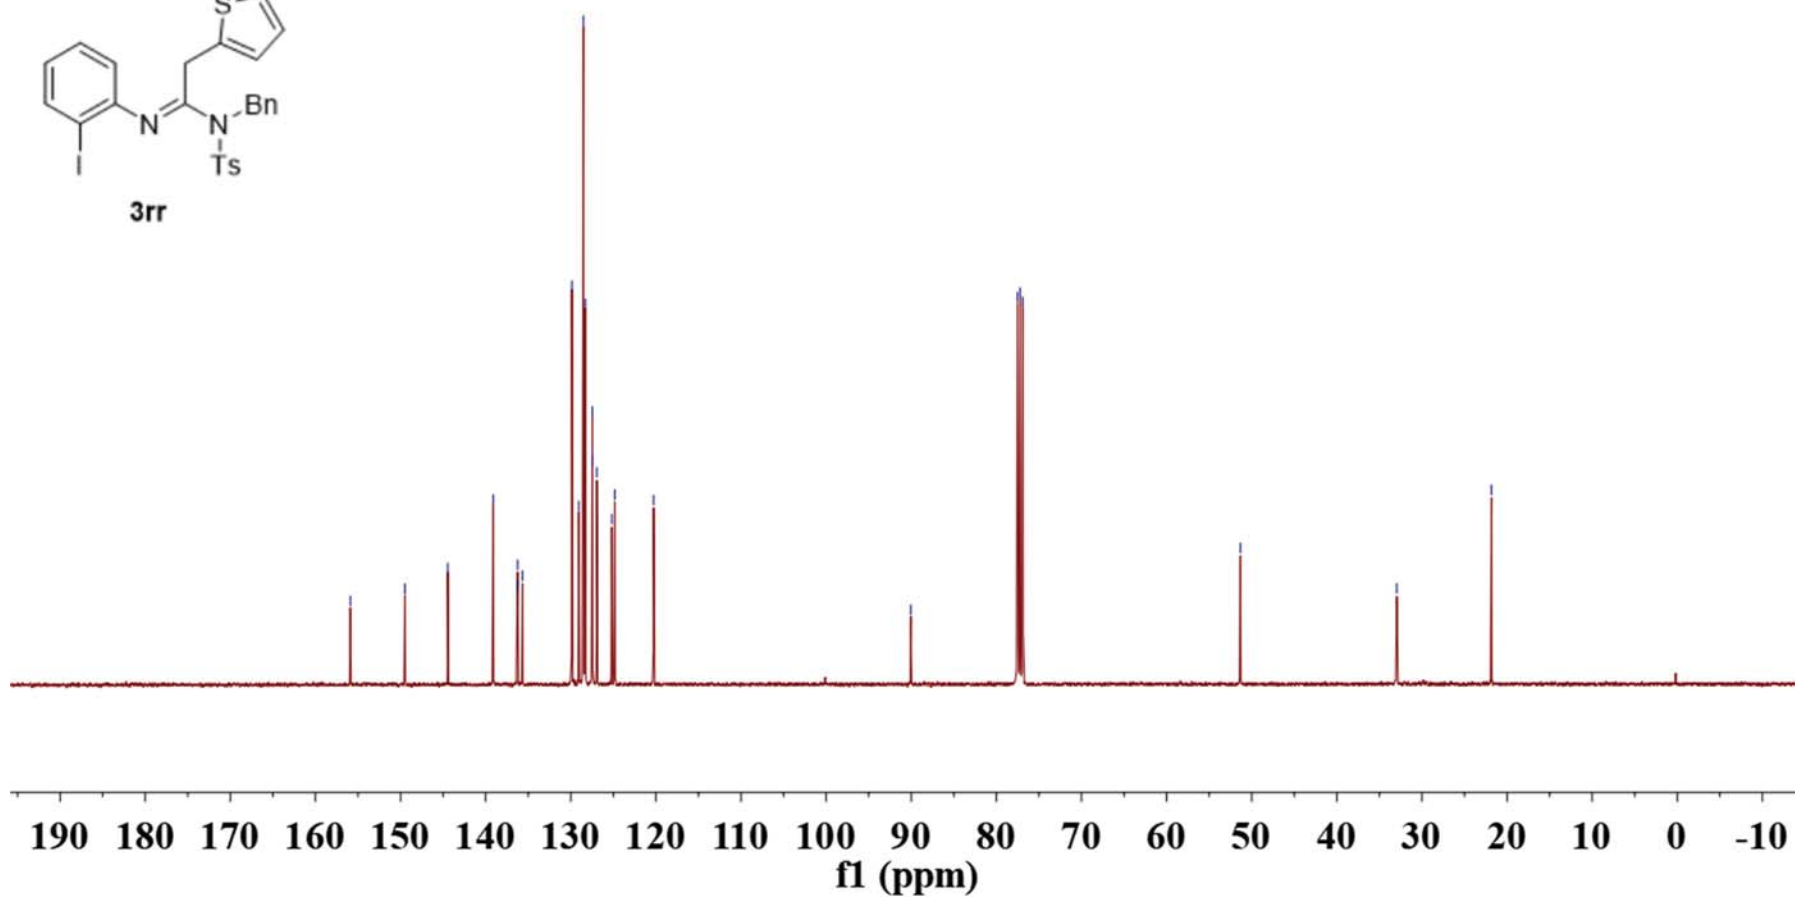

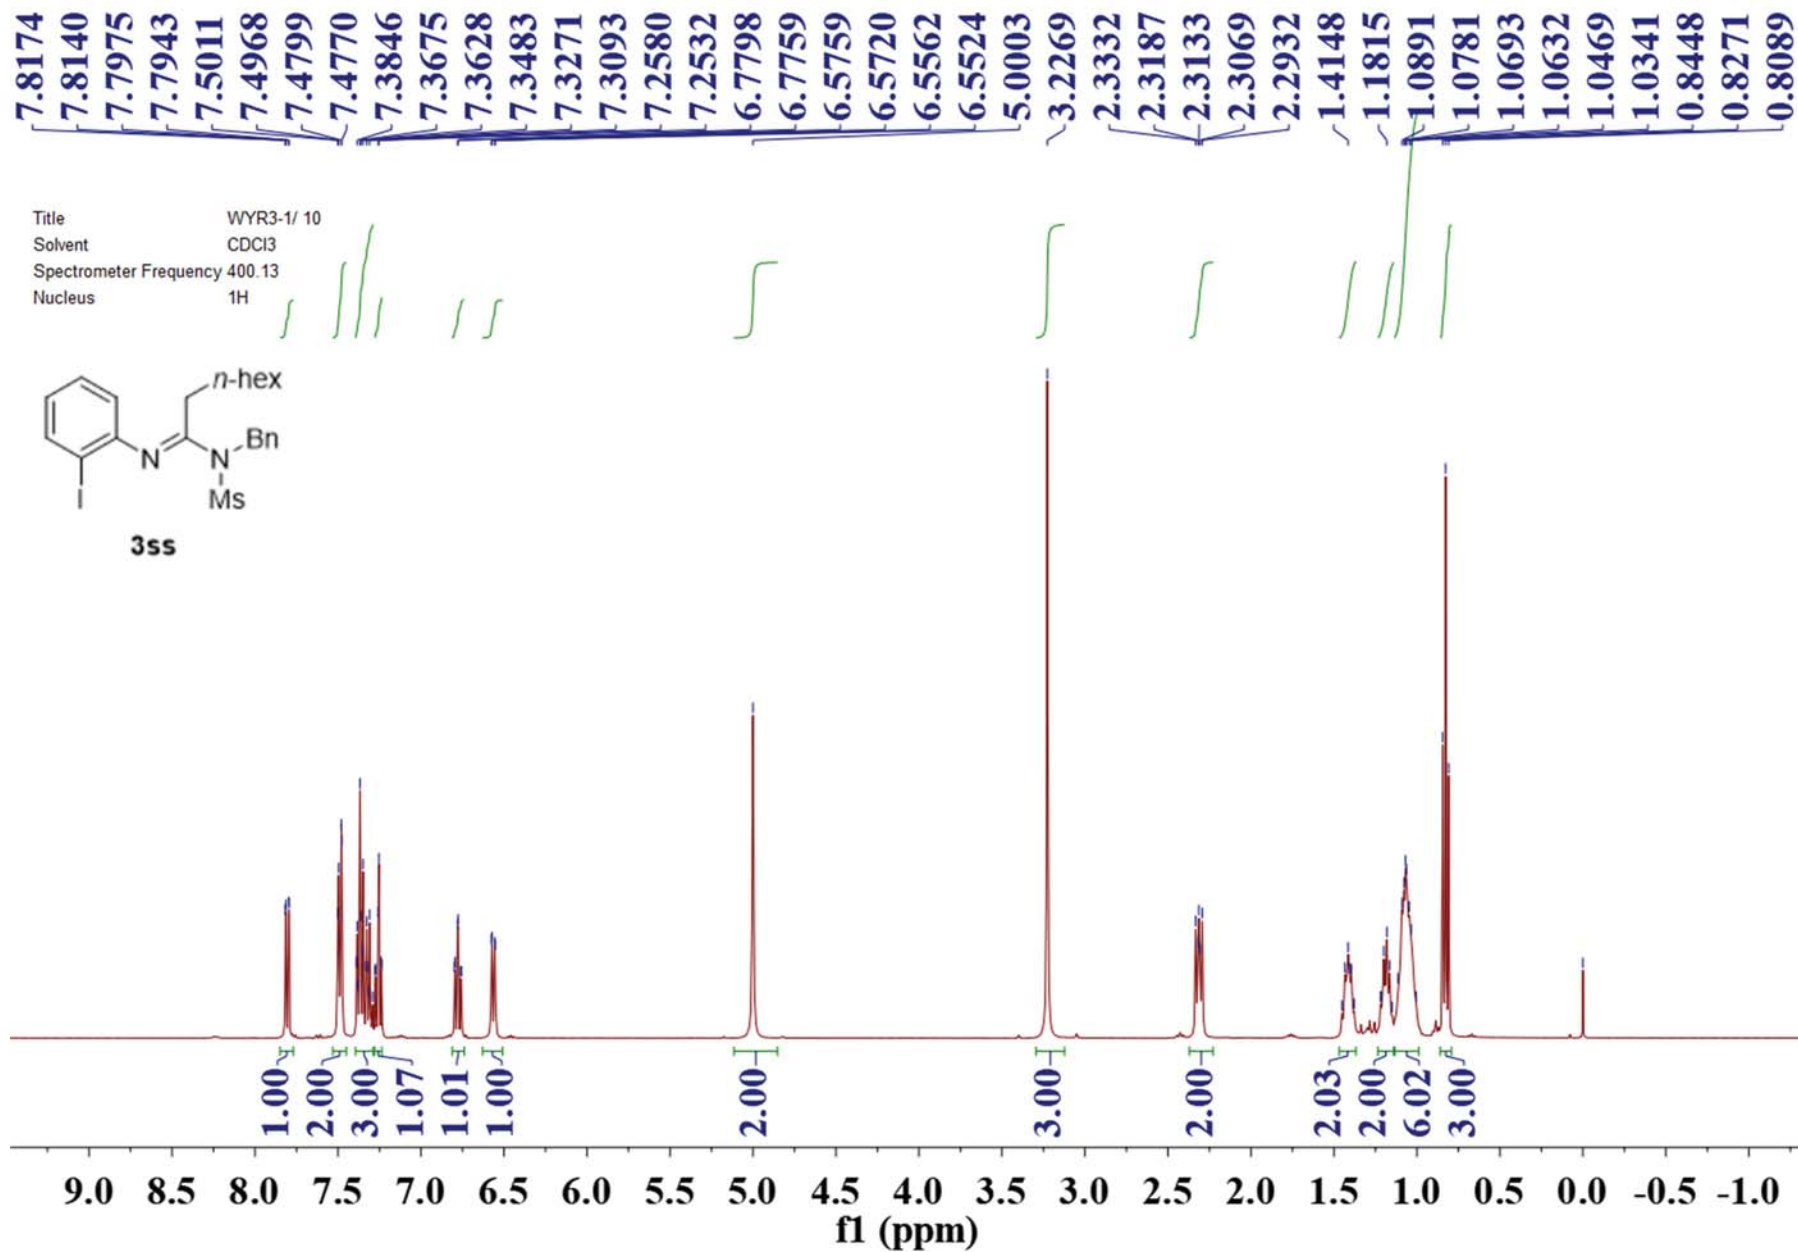

-160.665  
 -149.833  
 139.015  
 136.628  
 129.135  
 128.786  
 128.575  
 128.026  
 125.118  
 120.083  
  
 -90.666  
 77.518  
 77.200  
 76.882  
  
 -50.626  
 -42.670  
 31.543  
 31.325  
 29.252  
 28.685  
 26.717  
 22.656  
 14.195

Title WYR3-1.10.fid  
 Solvent CDCl3  
 Spectrometer Frequency 100.62  
 Nucleus 13C

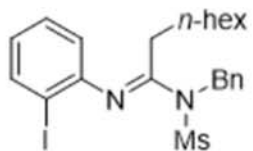

**3ss**

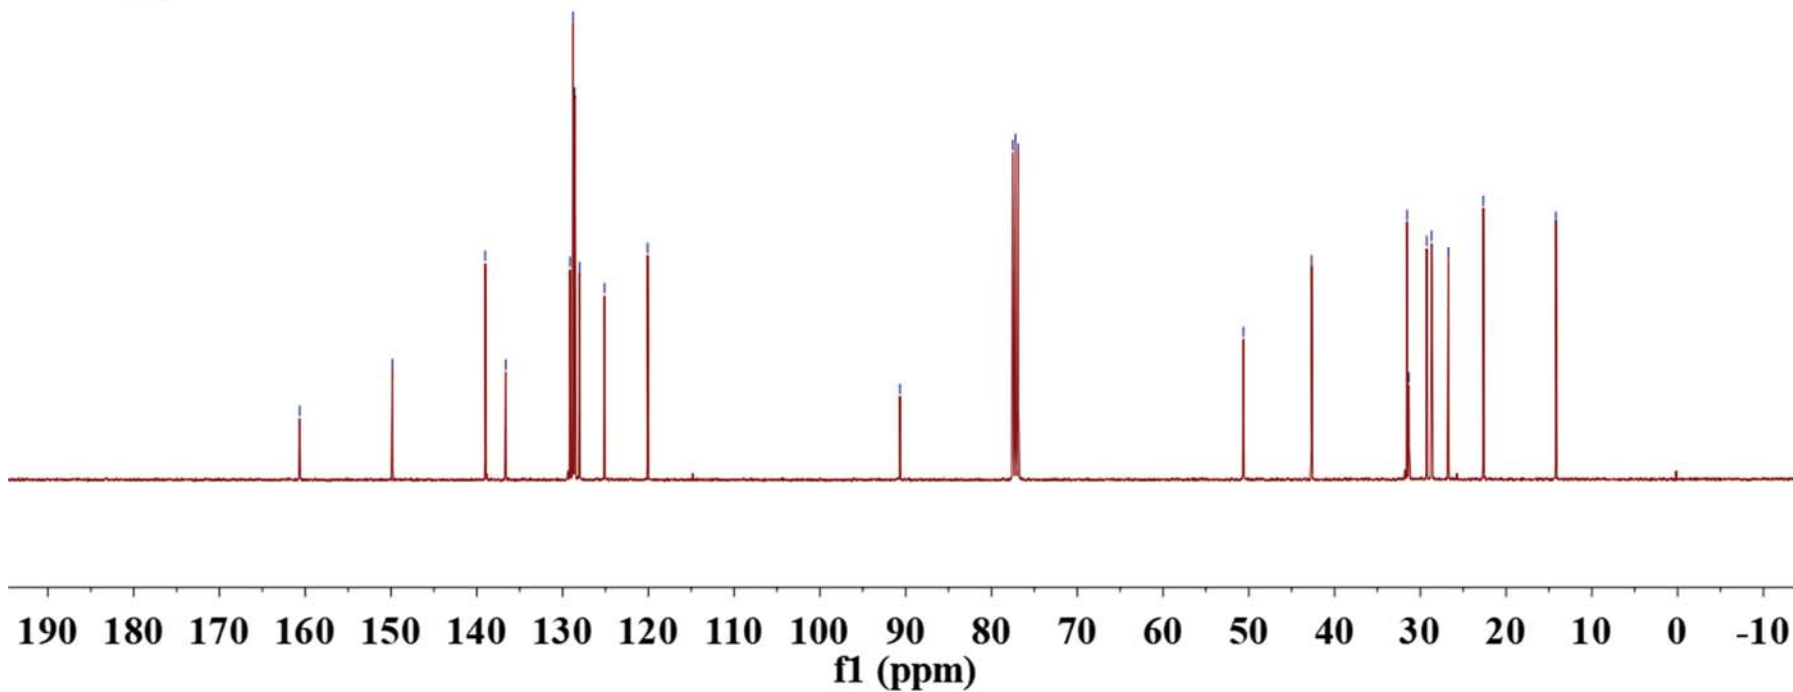

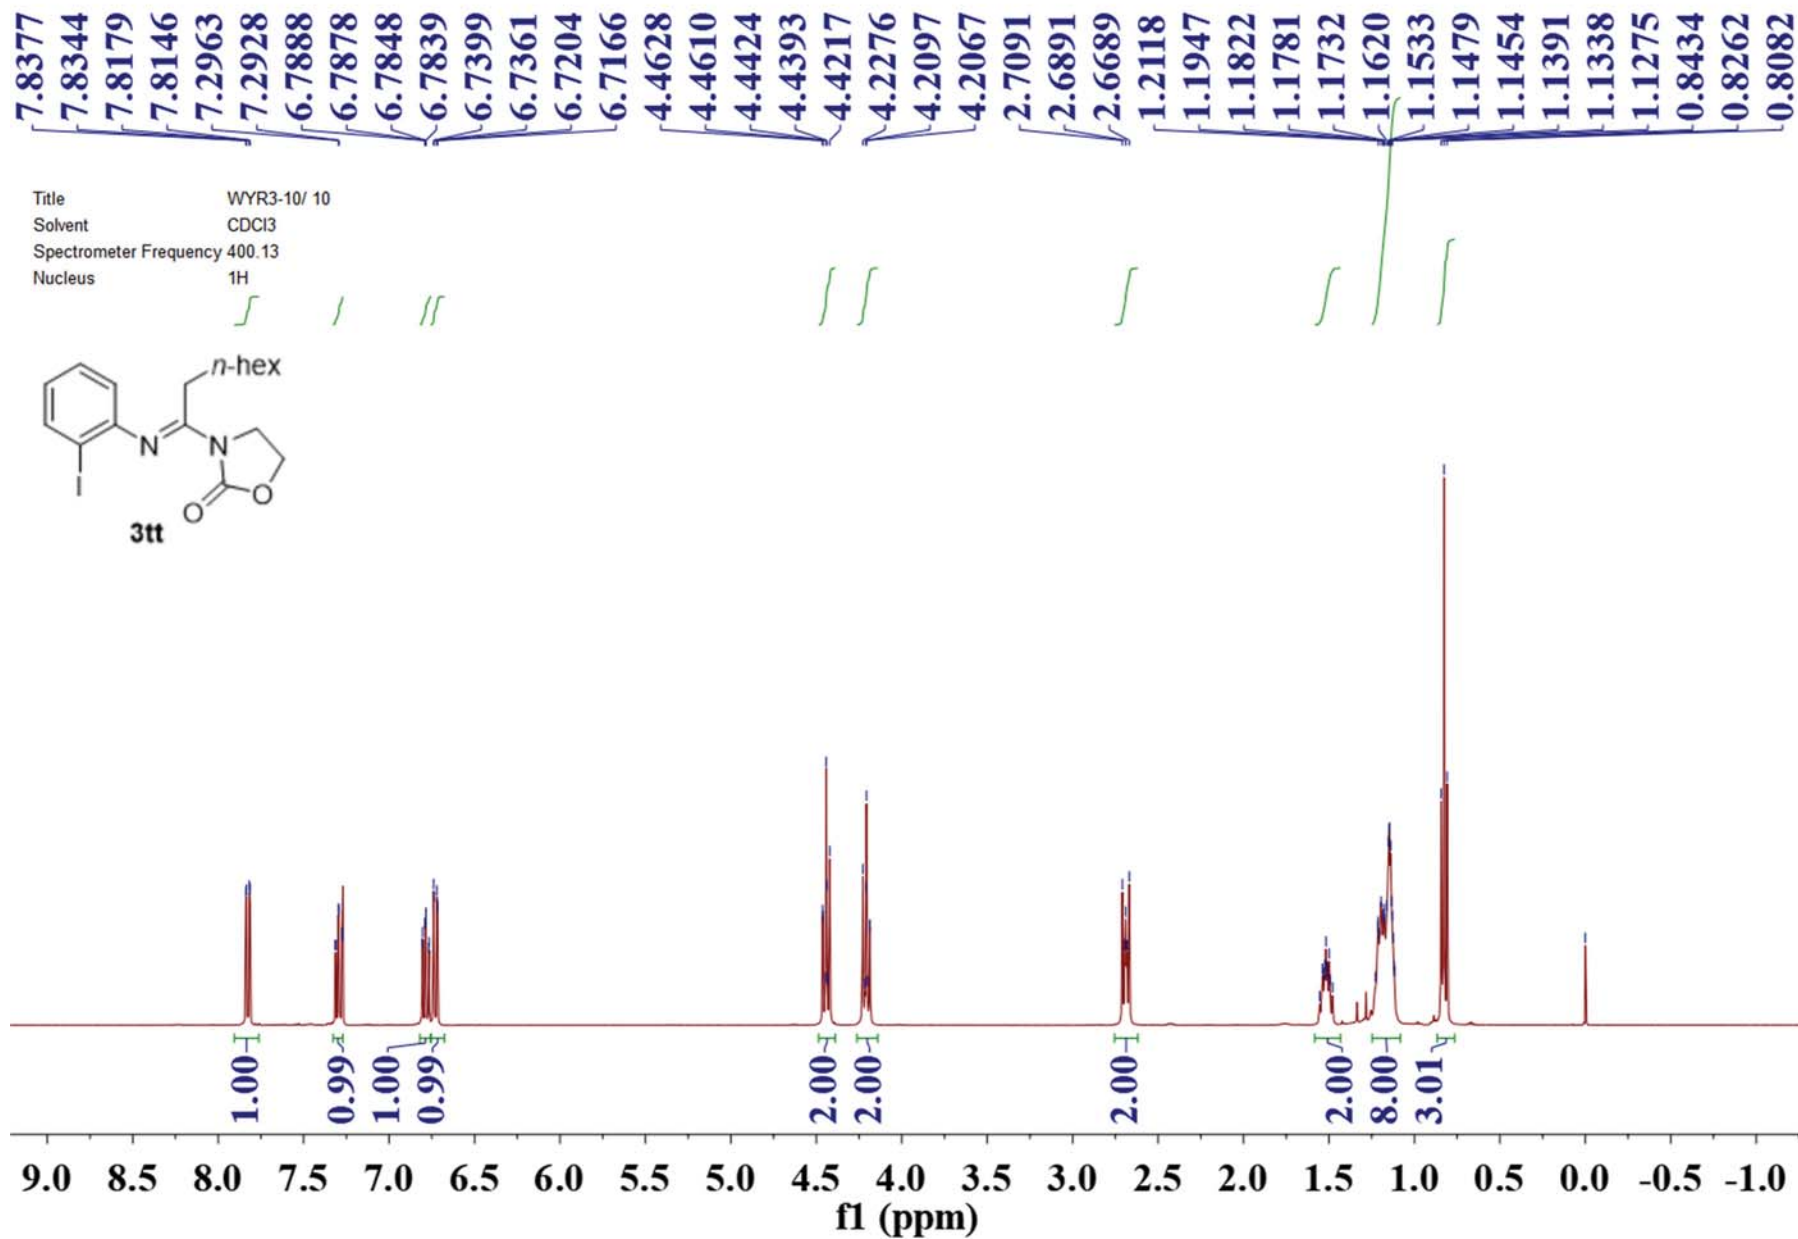



~158.587  
 ~154.117  
 ~149.594  
 ~139.029  
 ~129.015  
 ~124.914  
 ~120.529  
 -92.334  
 { 77.518  
 { 77.200  
 { 76.882  
 -62.051  
 -44.831  
 { 31.605  
 { 29.510  
 { 28.671  
 { 28.296  
 { 27.144  
 { 22.667  
 { 14.196

Title WYR3-10/ 10  
 Solvent CDCl3  
 Spectrometer Frequency 100.62  
 Nucleus 13C

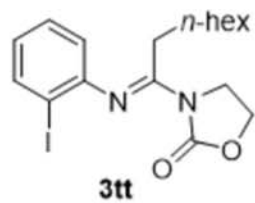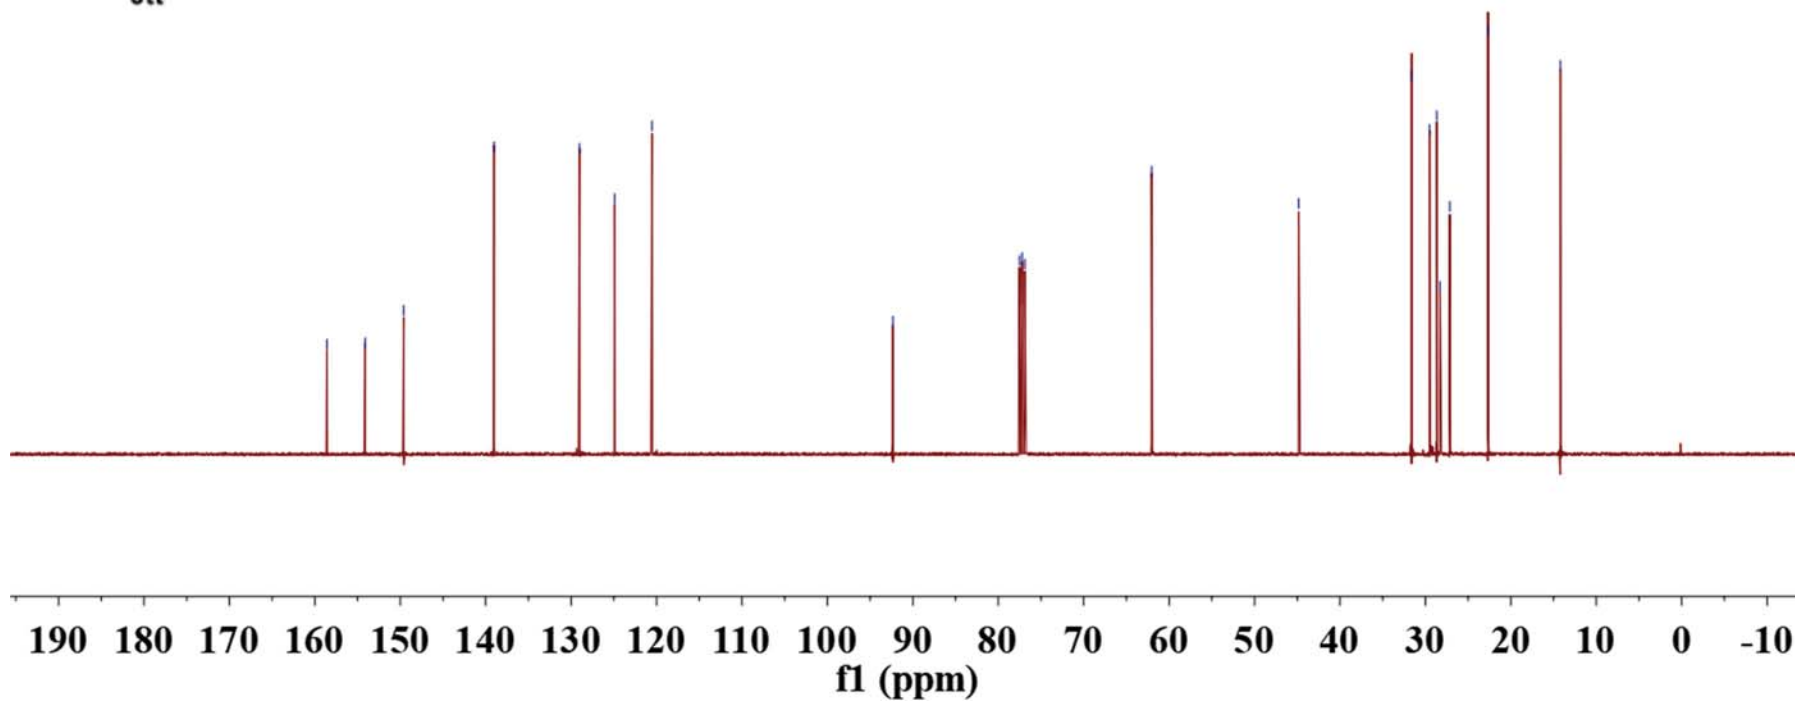

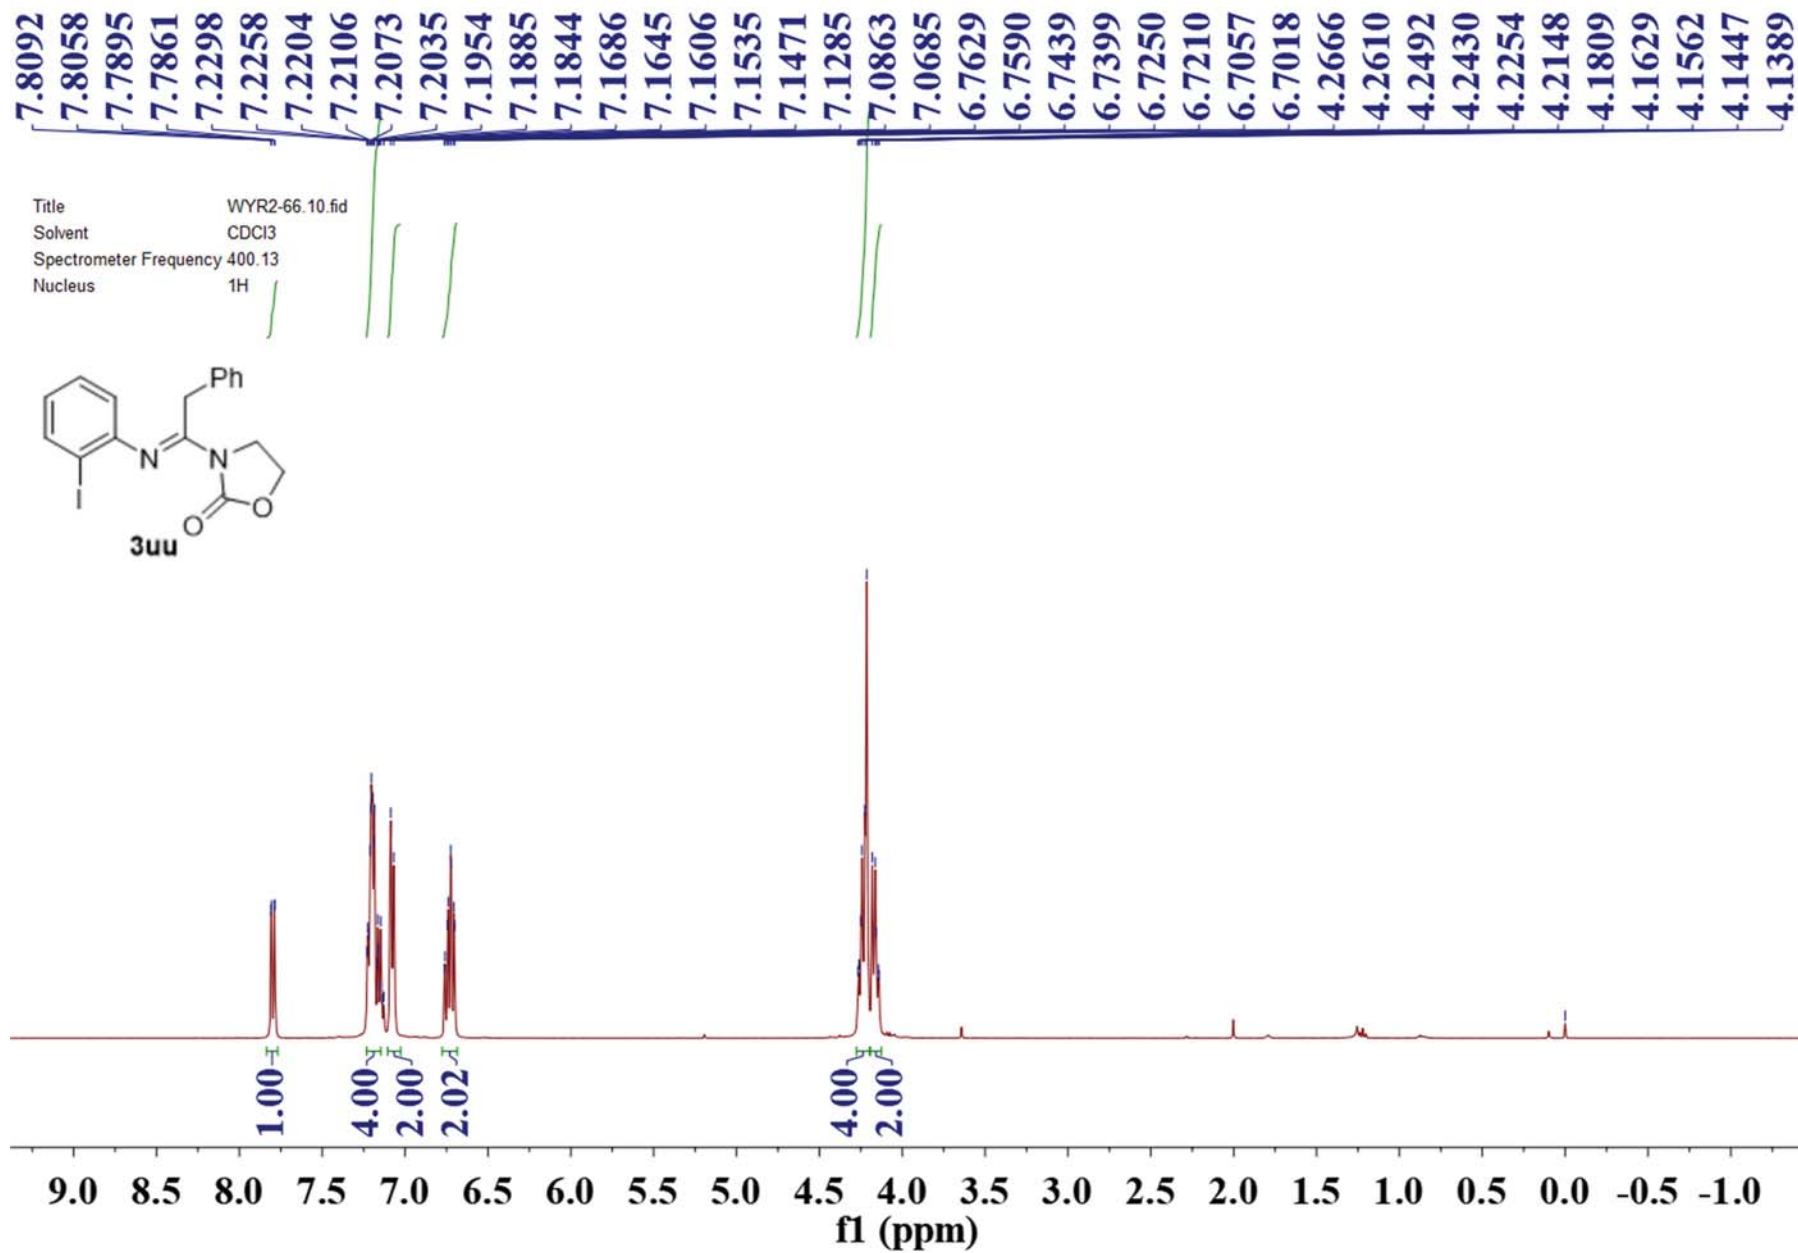

155.418  
153.822  
148.746  
138.901  
135.274  
128.899  
128.617  
128.360  
126.555  
125.120  
120.602

-92.798

77.519

77.200

76.881

-61.858

-44.872

-33.514

Title WYR2-66.10.fid  
Solvent CDCl3  
Spectrometer Frequency 100.62  
Nucleus 13C

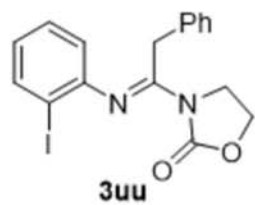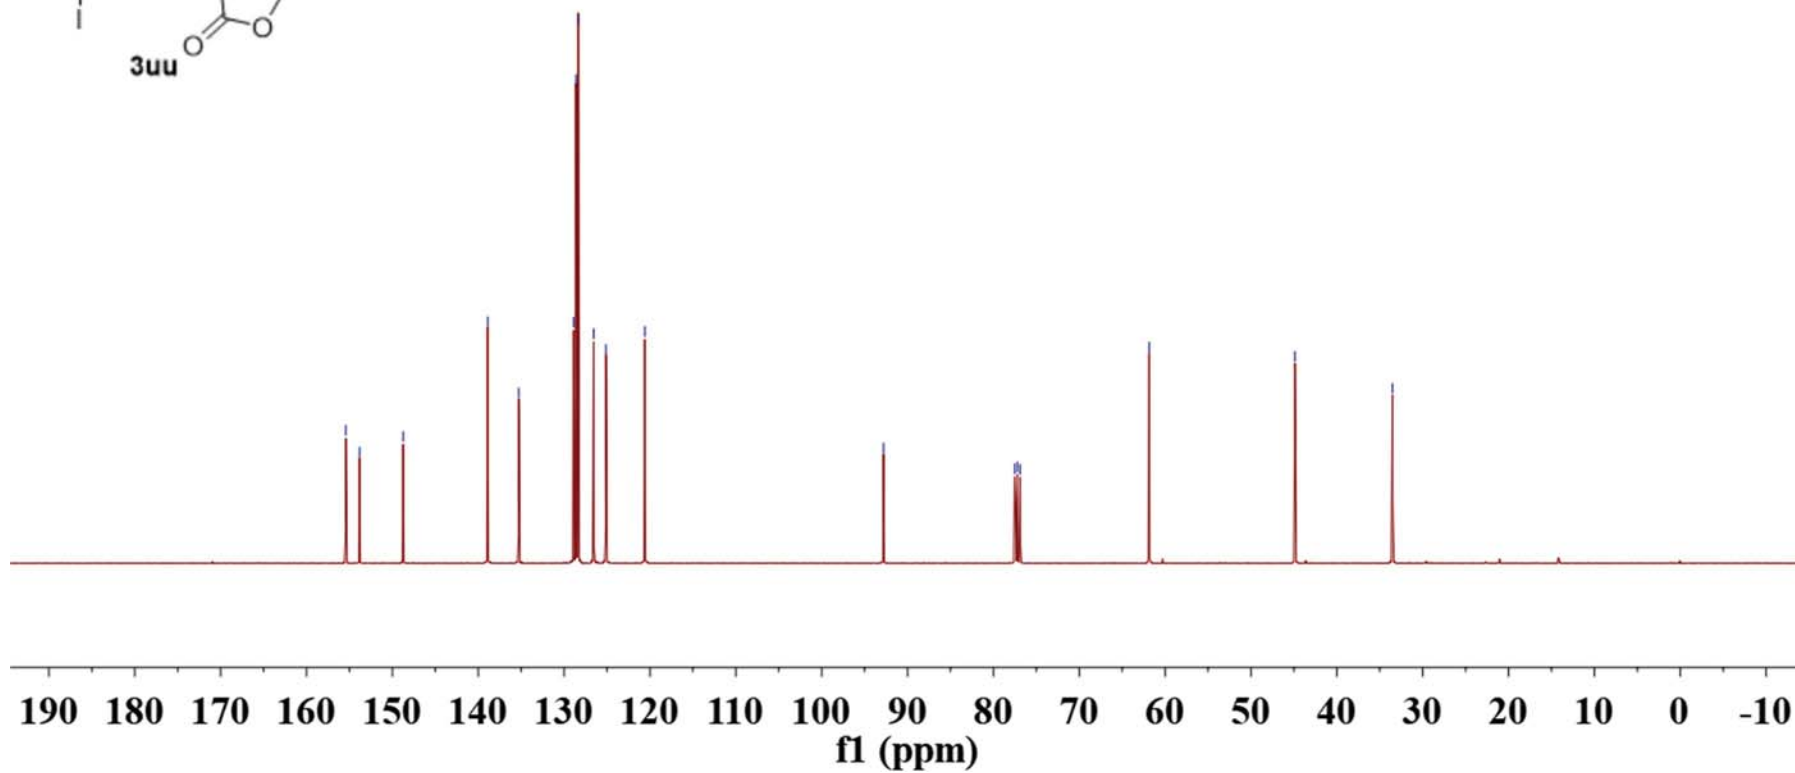

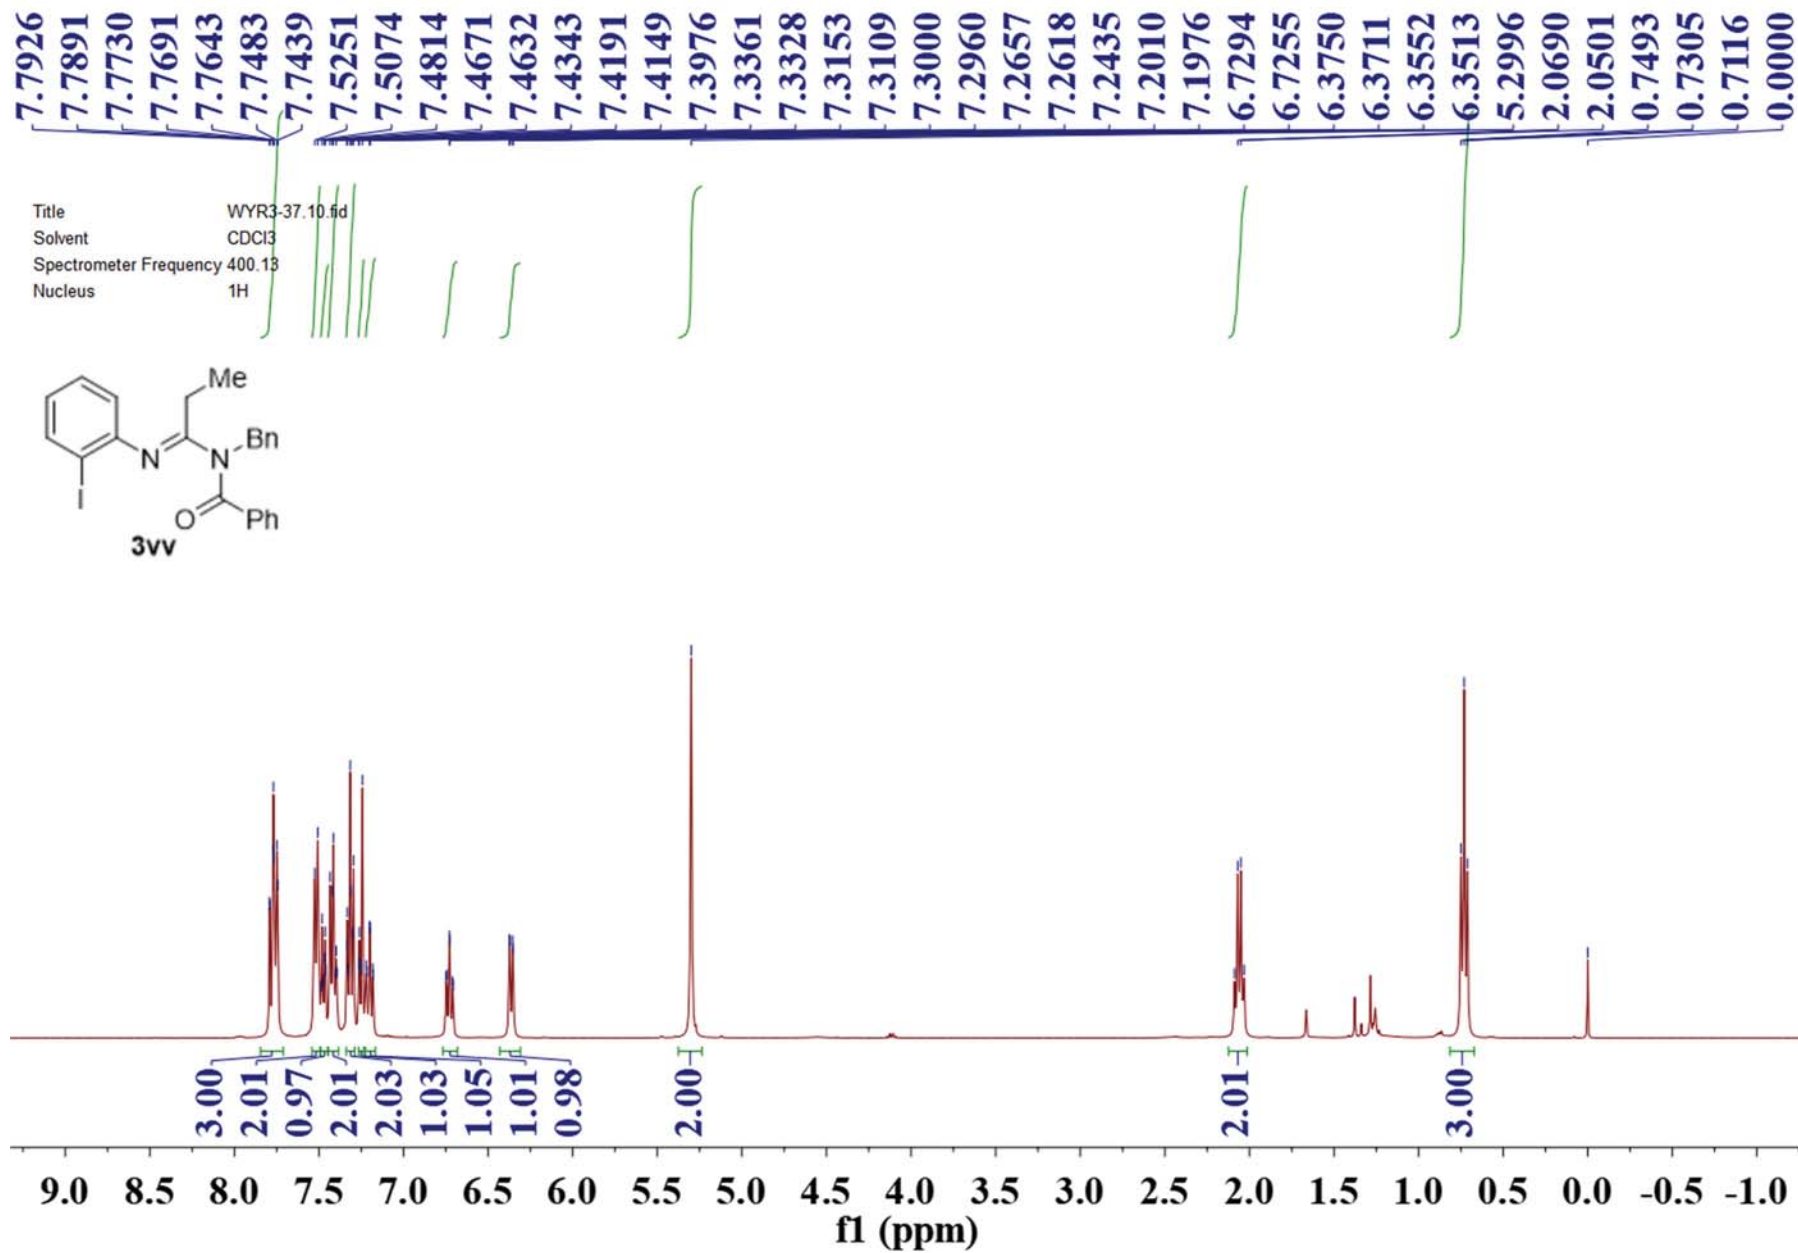

-173.001  
 -163.943  
 150.295  
 139.122  
 138.255  
 136.919  
 131.633  
 128.995  
 128.947  
 128.775  
 128.441  
 127.401  
 124.891  
 119.510  
 90.622  
 77.518  
 77.200  
 76.882  
 -52.054  
 -26.379  
 -10.700

Title WYR3-37.10.fid  
 Solvent CDCl3  
 Spectrometer Frequency 100.62  
 Nucleus 13C

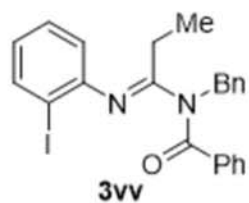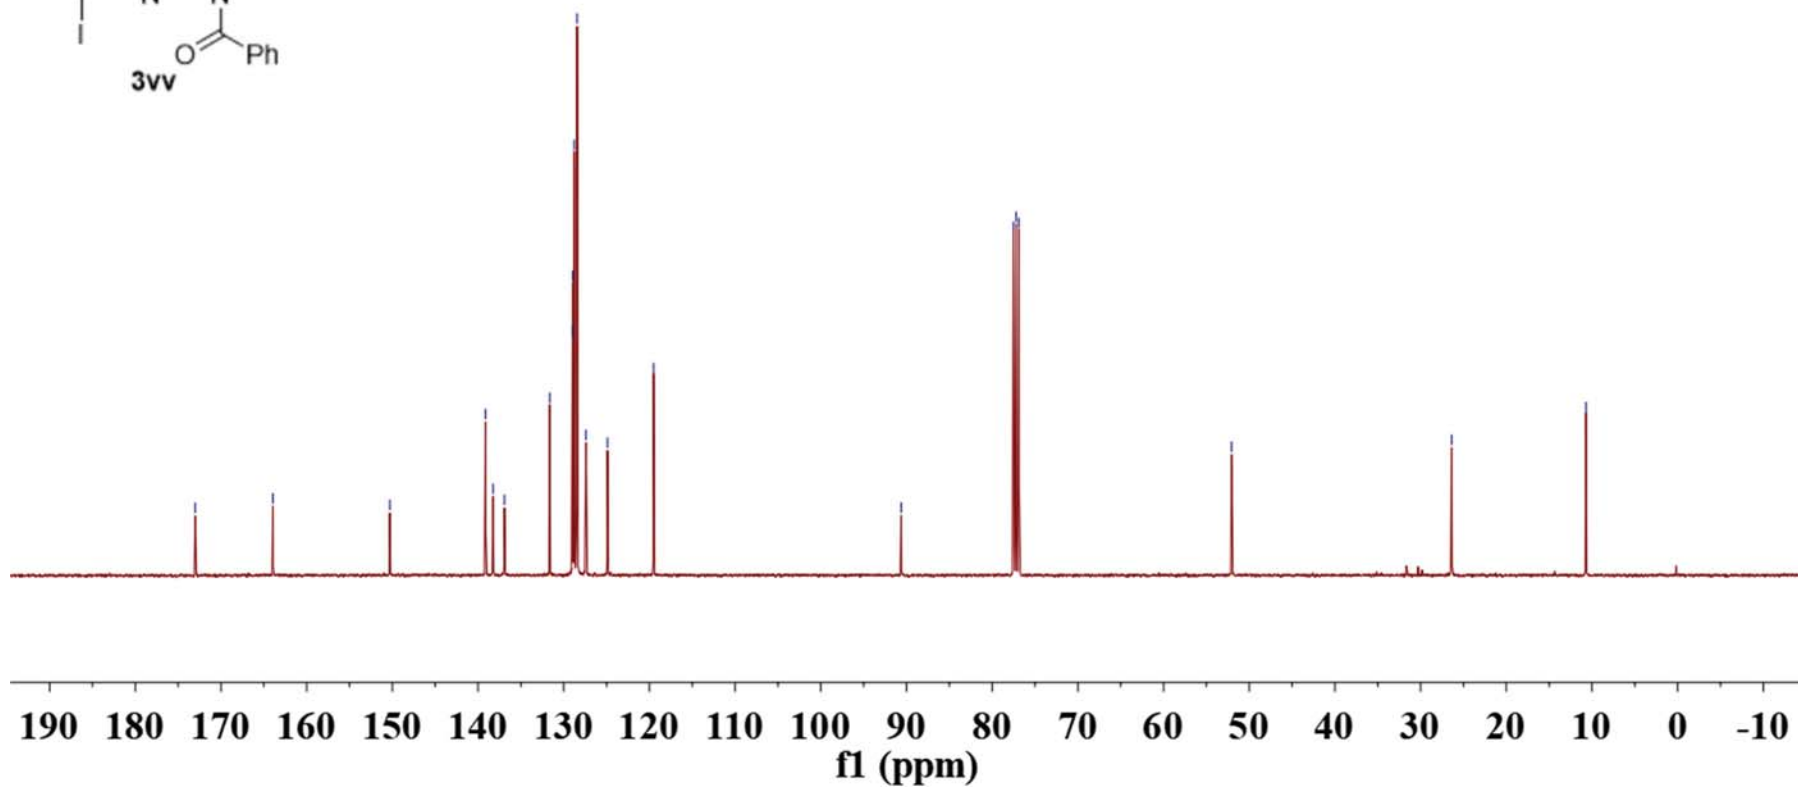

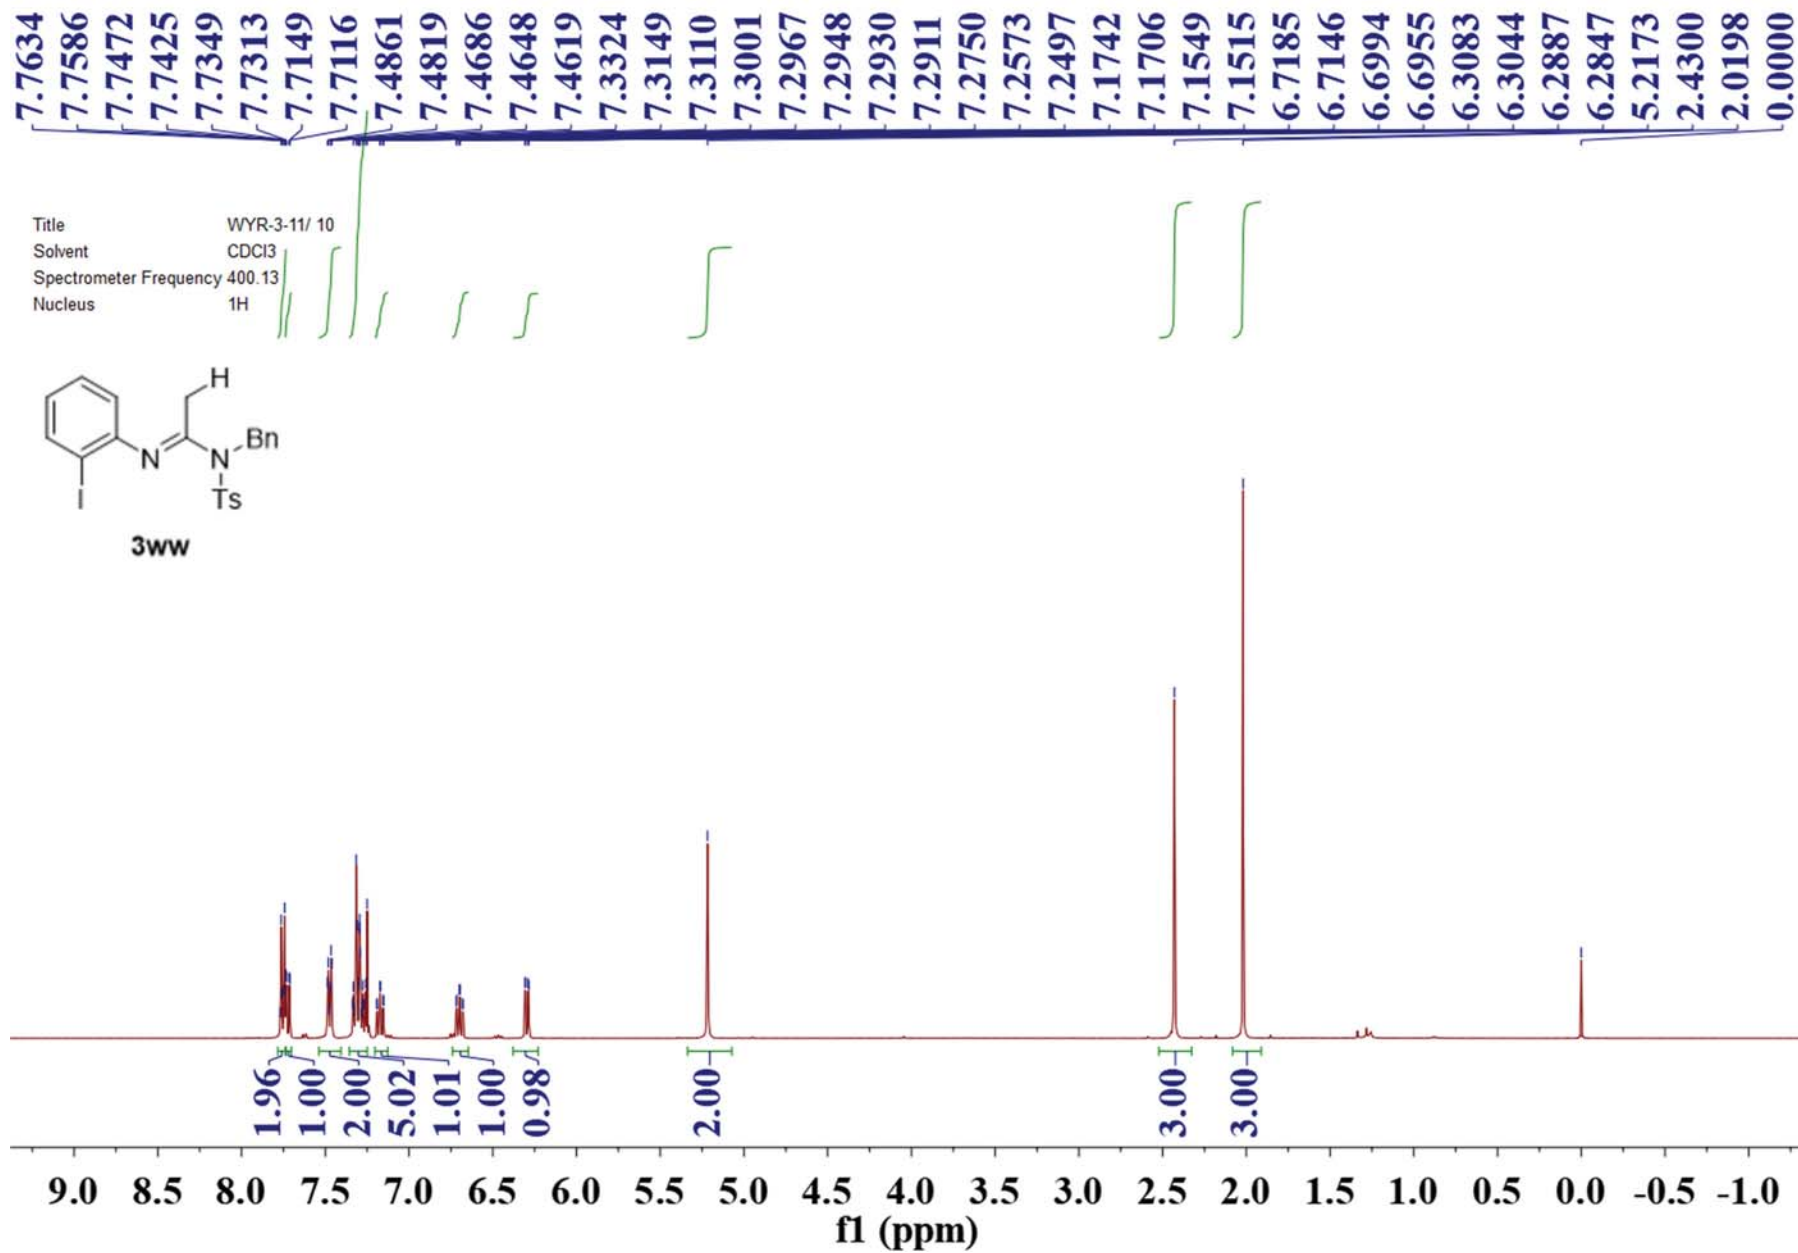

155.822  
150.362  
144.442  
139.108  
137.547  
137.333  
129.999  
129.153  
128.570  
128.454  
127.673  
127.458  
124.780  
120.074

-90.262  
77.518  
77.200  
76.882

-50.965

21.786  
19.624

Title WYR3-11.10.fid  
Solvent CDCl3  
Spectrometer Frequency 100.62  
Nucleus 13C

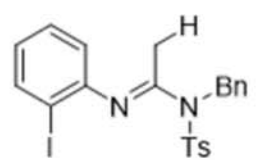

3ww

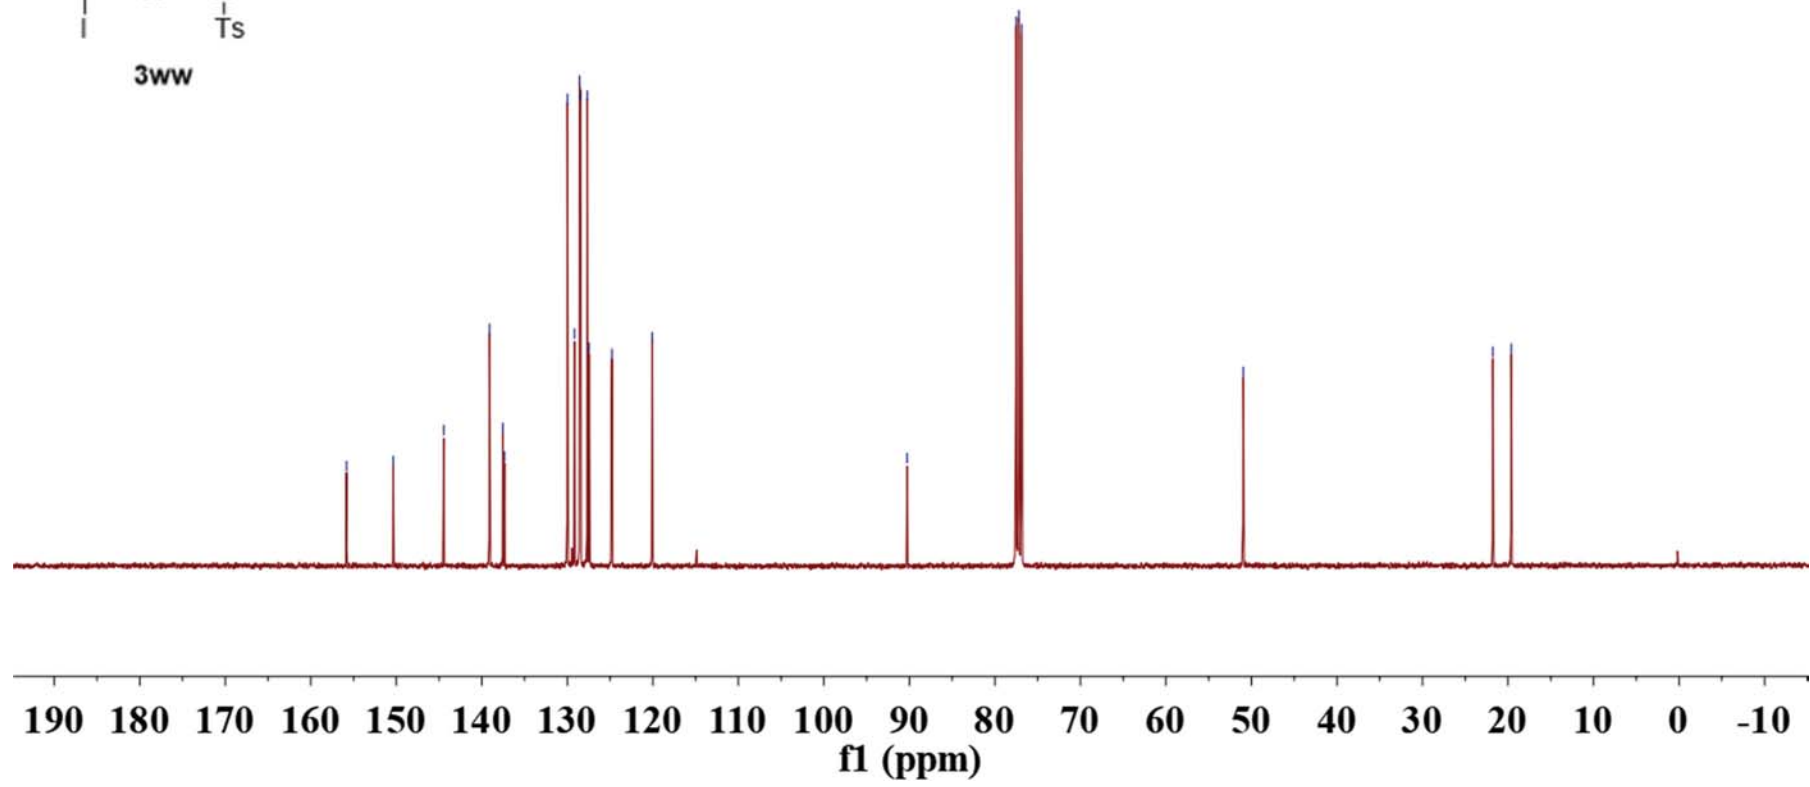

# <sup>1</sup>H NMR and <sup>13</sup>C NMR Spectra of Ethene-1,1-Diamines 5.

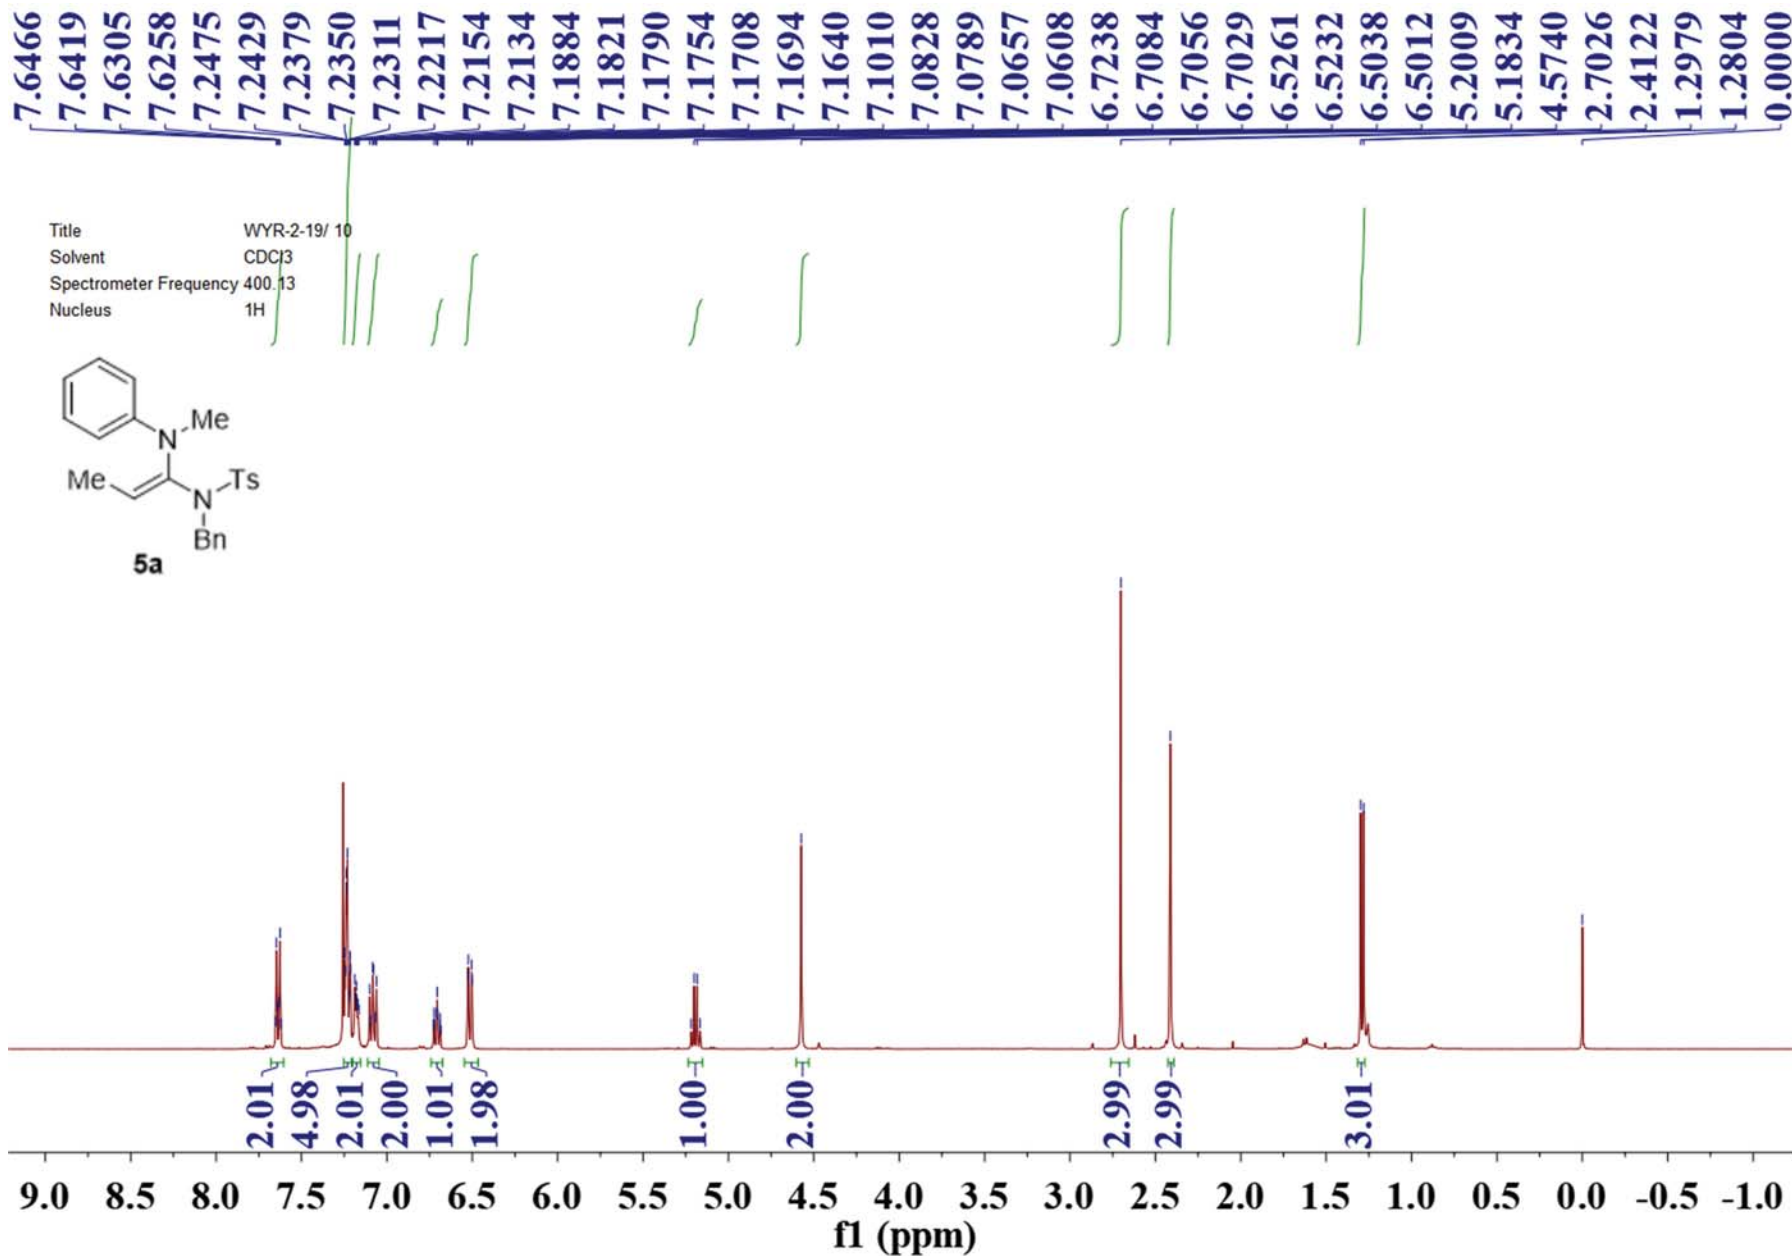



146.439  
 143.519  
 137.980  
 137.595  
 137.161  
 129.548  
 128.915  
 128.453  
 128.410  
 127.720  
 127.551  
 118.378  
 115.131  
 114.196  
 77.518  
 77.200  
 76.882  
 -51.700  
 -35.059  
 -21.712  
 -13.366

Title WYR2-19.10.fid  
 Solvent CDCl3  
 Spectrometer Frequency 100.62  
 Nucleus 13C

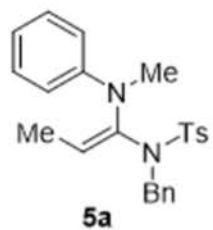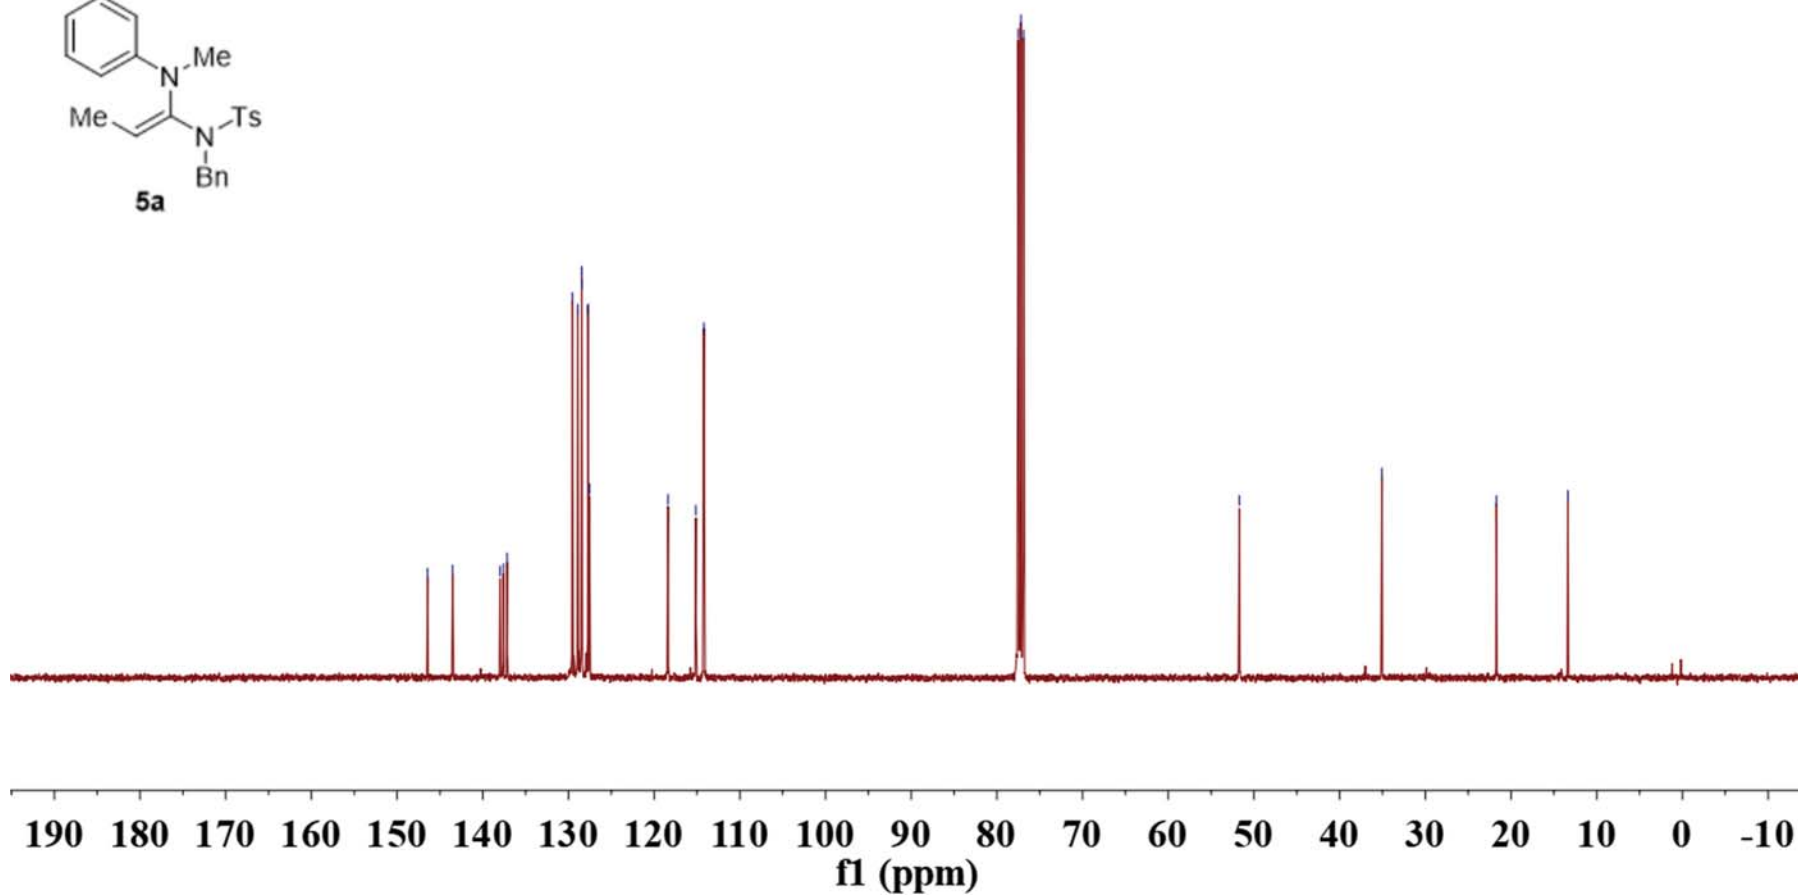

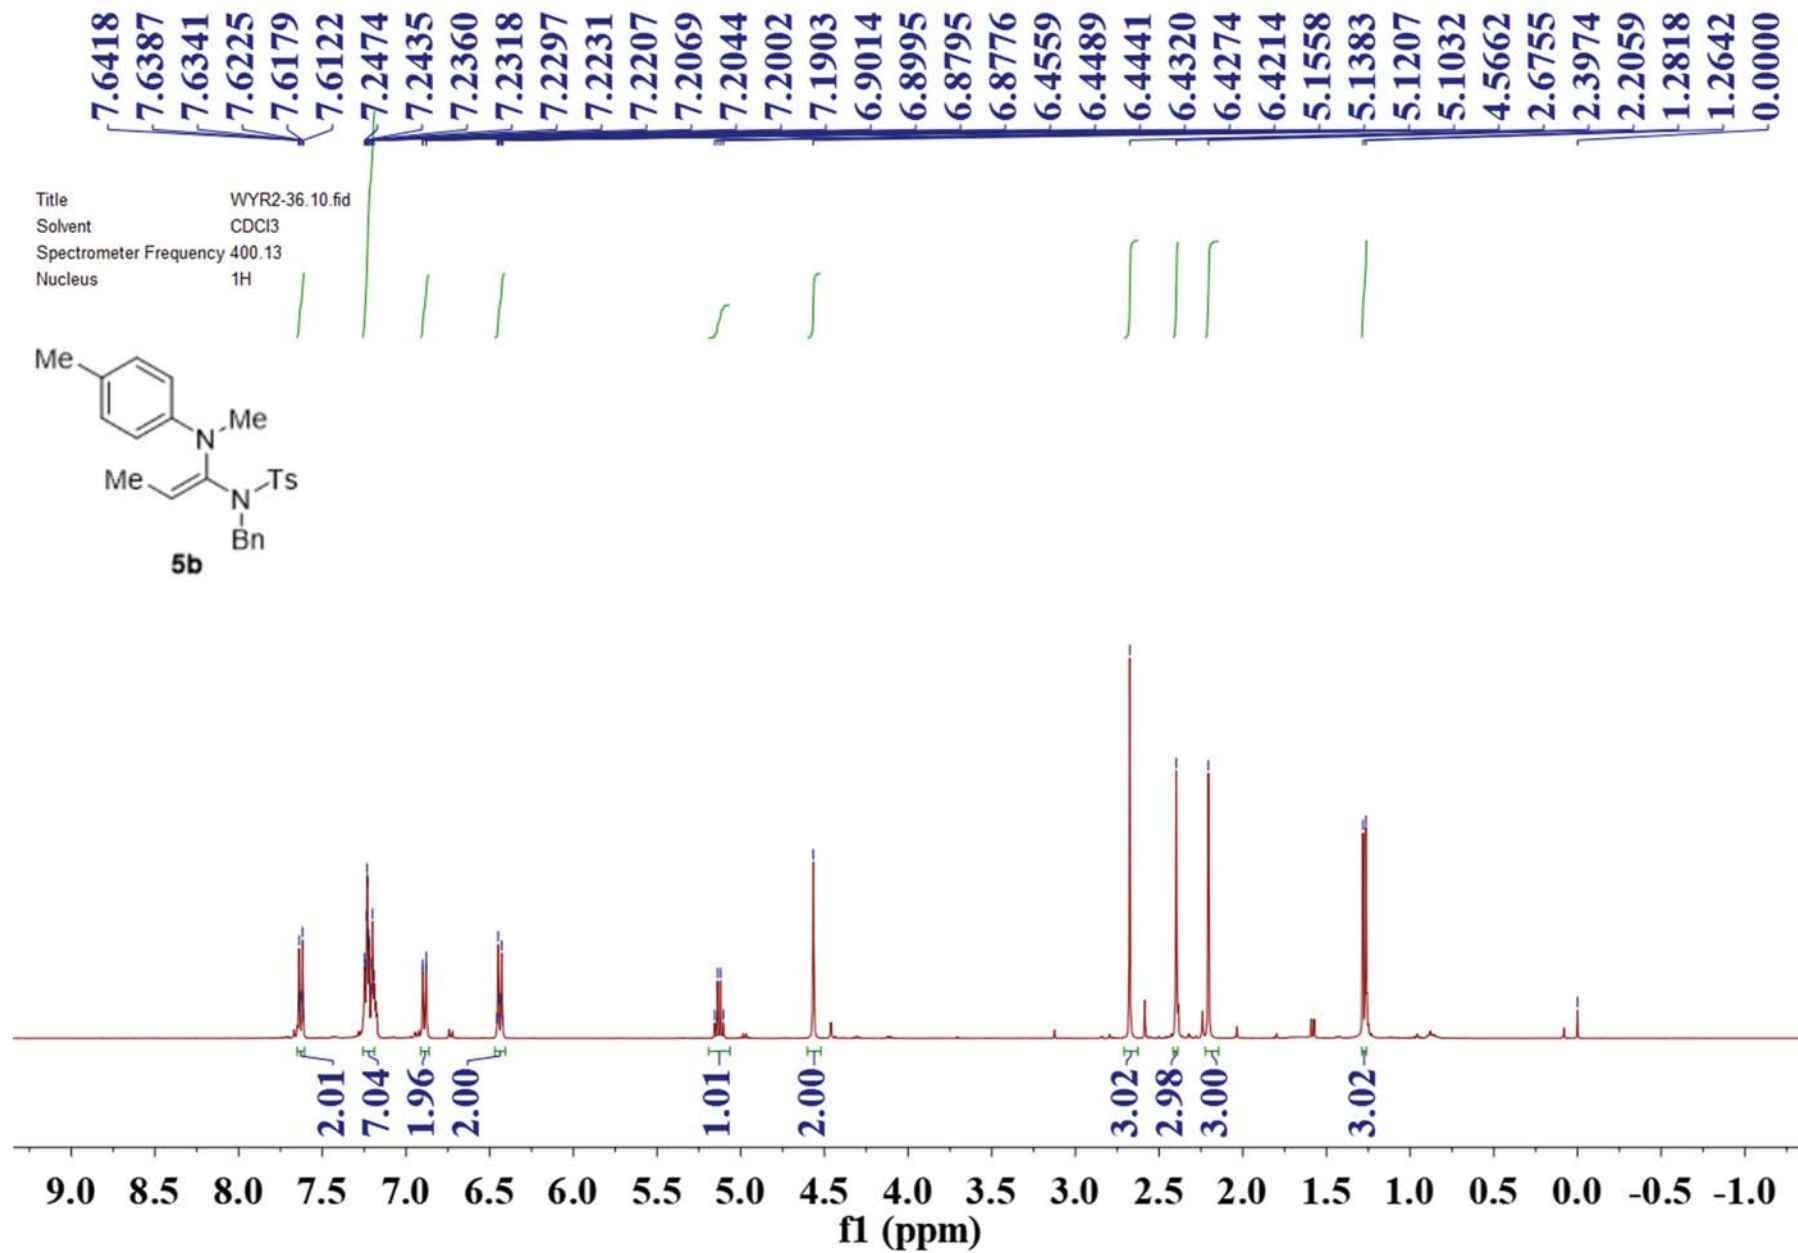

144.225  
143.423  
137.995  
137.807  
137.226  
129.483  
129.421  
128.408  
128.390  
127.690  
127.504  
127.488  
114.368  
114.290

77.518  
77.200  
76.882

-51.602

-35.104

21.659  
20.467  
13.338

Title WYR2-36.10.fid  
Solvent CDCl3  
Spectrometer Frequency 100.62  
Nucleus 13C

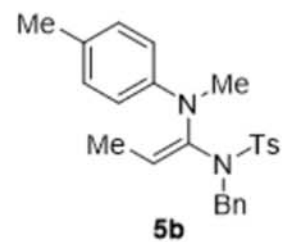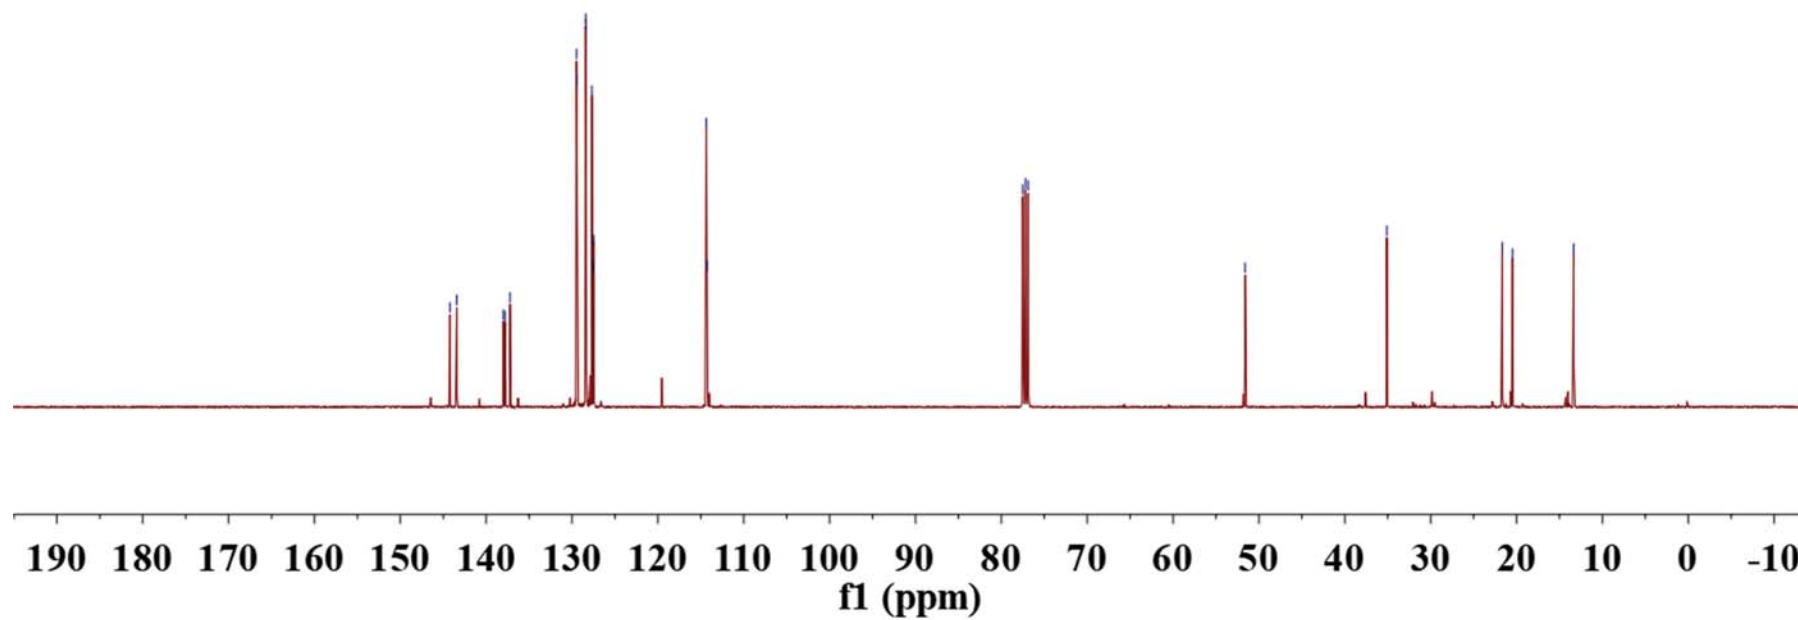

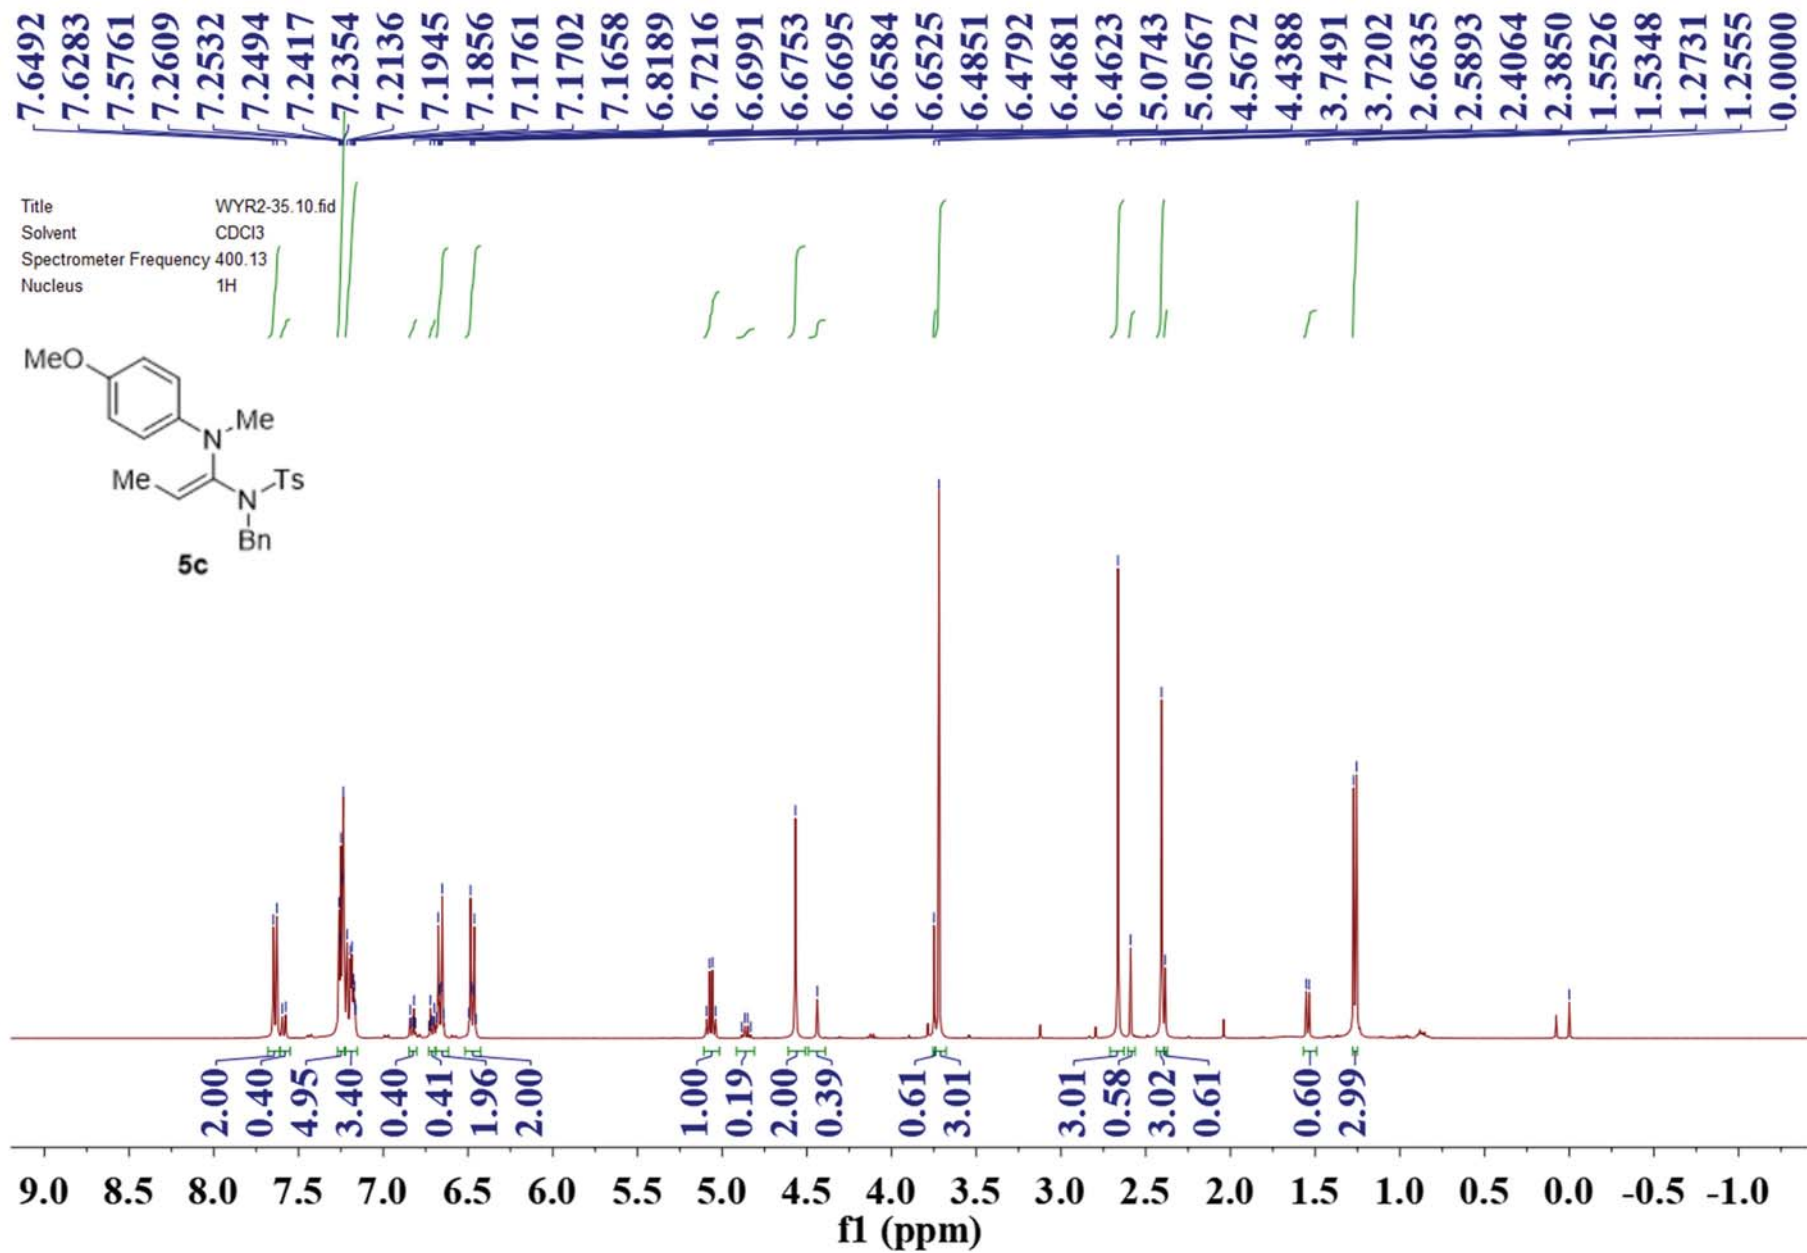

152.481  
 143.426  
 140.664  
 138.246  
 137.966  
 137.157  
 129.543  
 129.492  
 129.443  
 128.431  
 128.280  
 127.955  
 127.839  
 127.692  
 127.524  
 122.447  
 115.809  
 114.260  
 114.215  
 113.429  
 112.011  
 77.518  
 77.200  
 76.882  
 55.684  
 55.601  
 51.915  
 51.798  
 ~39.004  
 ~35.489  
 21.674  
 21.637  
 13.866  
 13.262

Title WYR2-35.10.fid  
 Solvent CDCl3  
 Spectrometer Frequency 100.62  
 Nucleus 13C

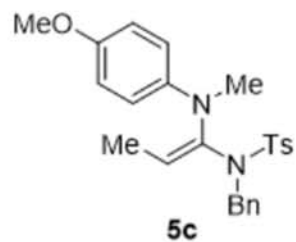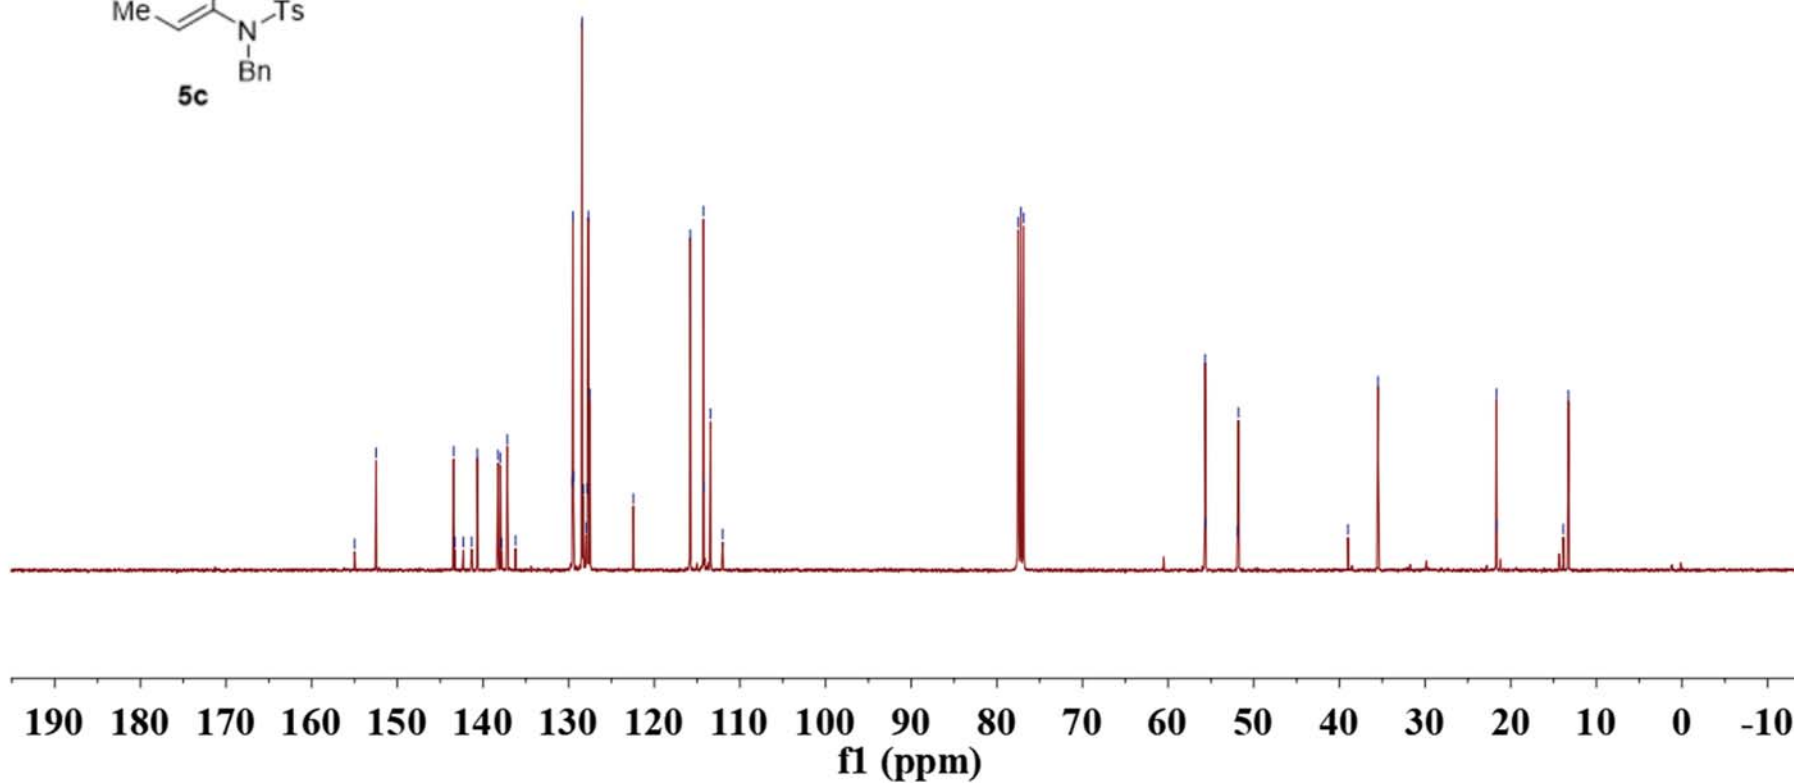

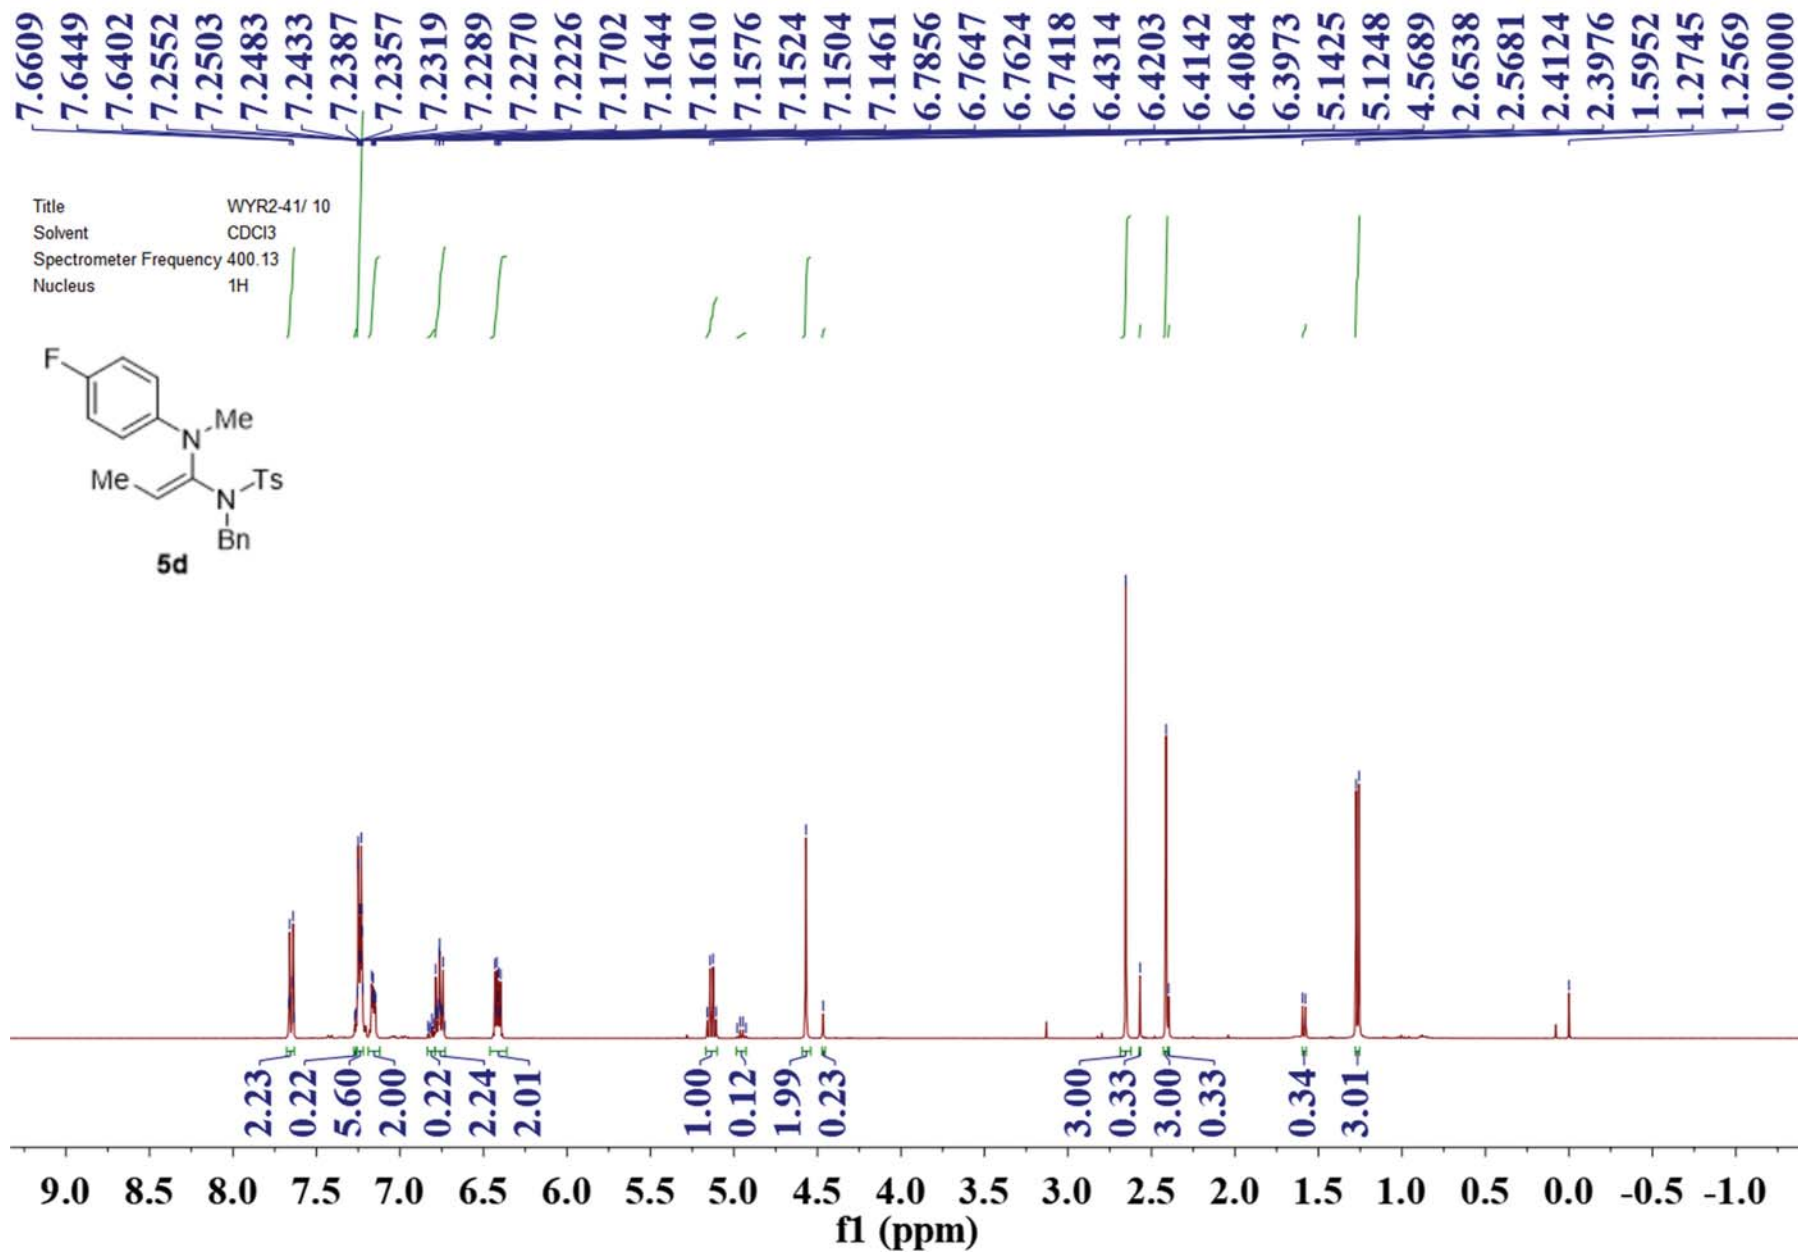

157.364  
155.011  
143.601  
142.765  
142.745  
137.932  
137.819  
137.676  
136.923  
136.120  
129.576  
129.425  
128.472  
128.414  
128.382  
128.067  
128.046  
127.808  
127.656  
127.627  
120.978  
120.901  
115.415  
115.336  
115.258  
115.194  
115.119  
114.456  
114.128  
77.518  
77.200  
76.882  
52.003  
51.959  
37.945  
35.451  
21.684  
21.656  
13.990  
13.278

Title WYR2-41.10.fid  
Solvent CDCl3  
Spectrometer Frequency 100.62  
Nucleus 13C

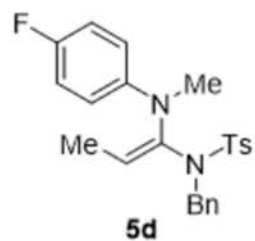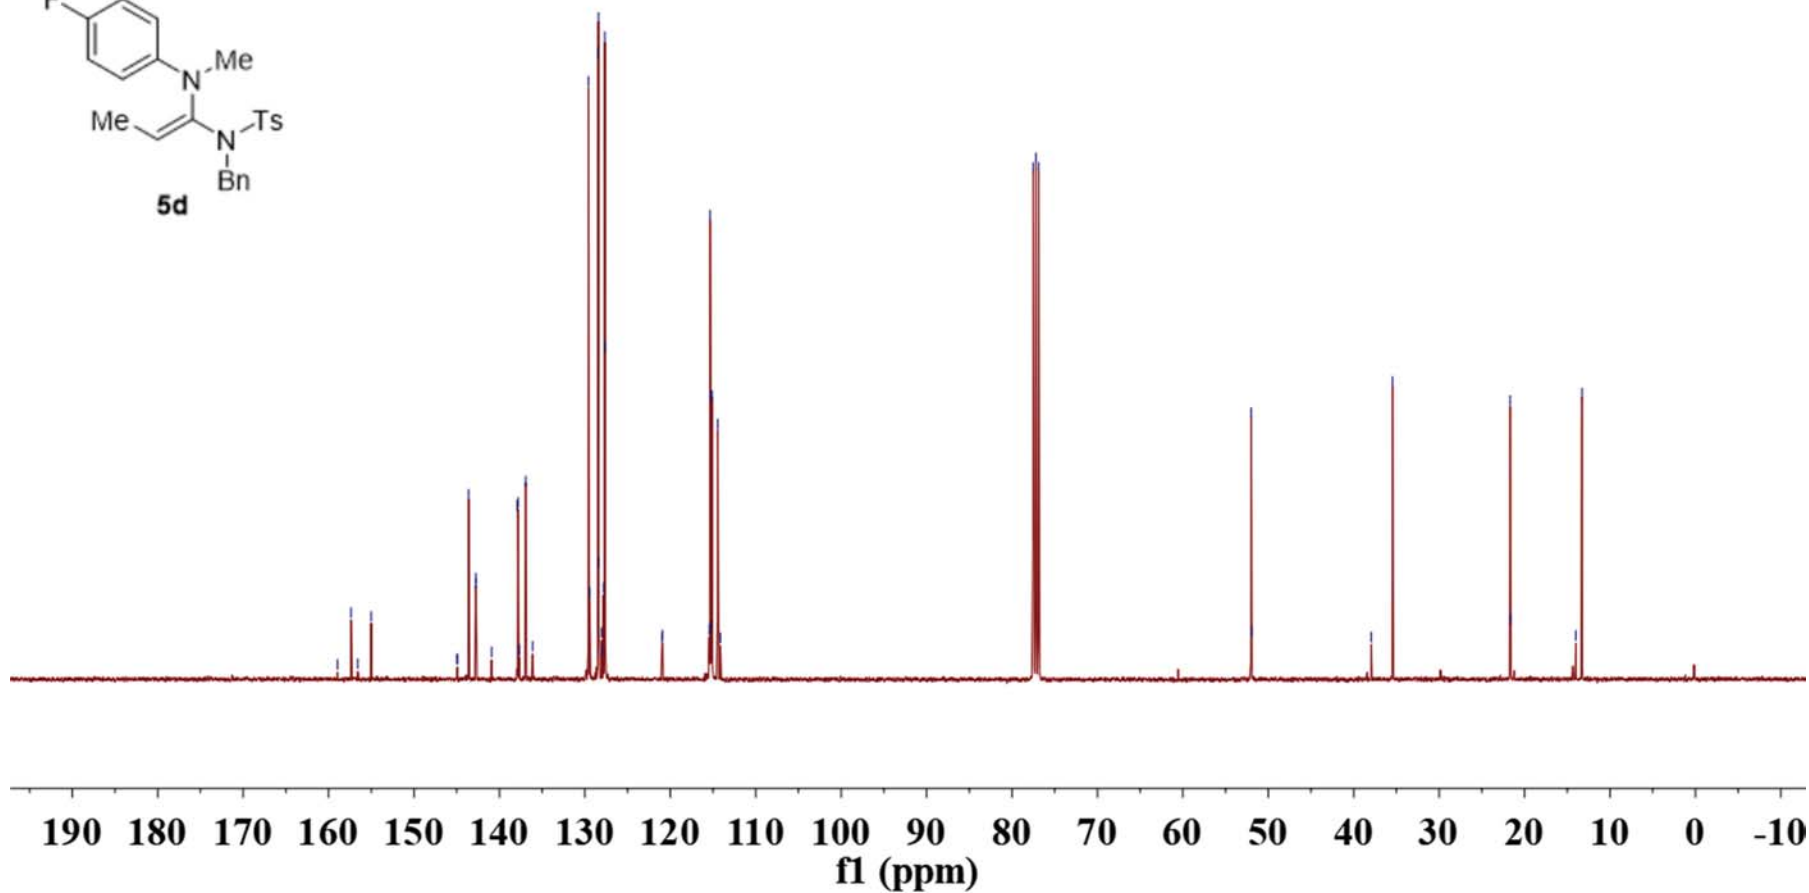

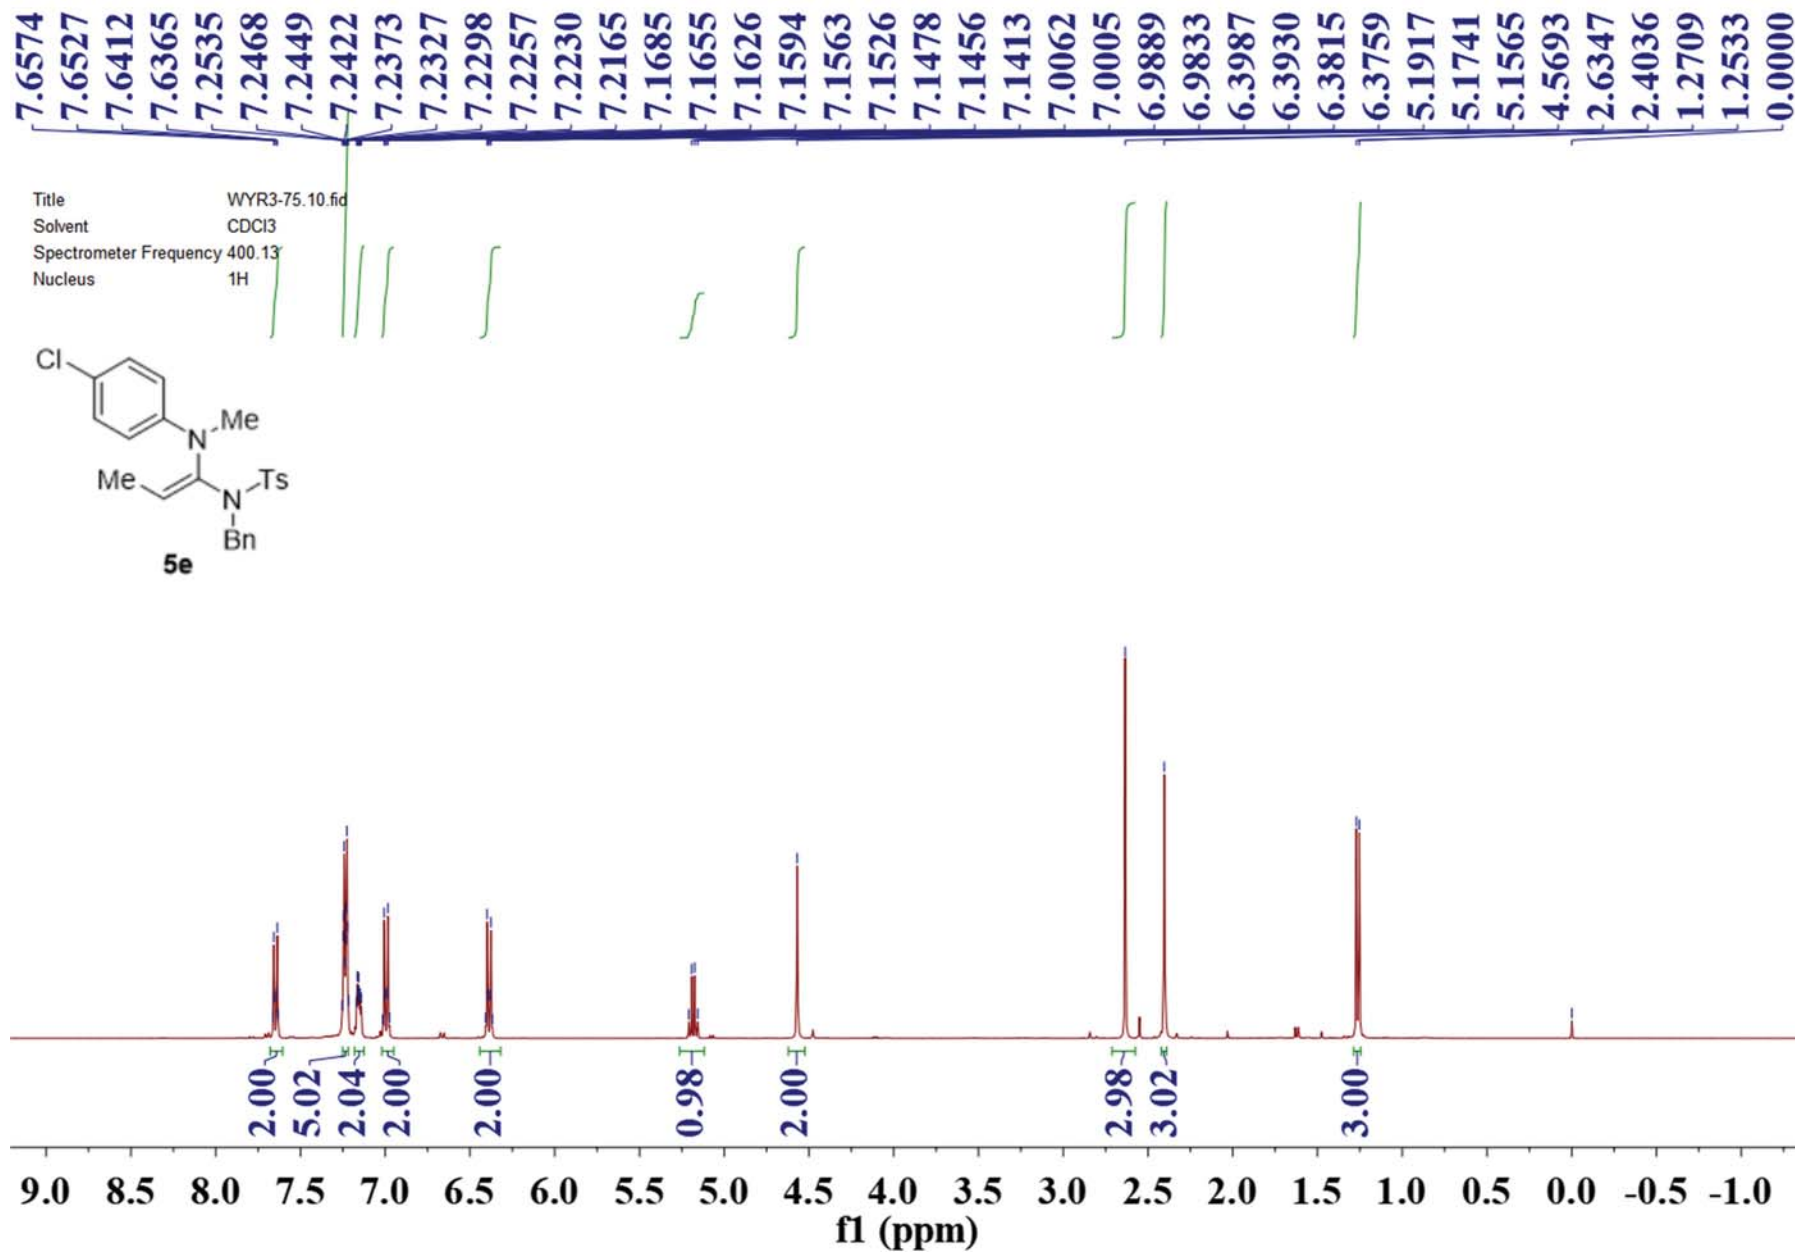



144.943  
143.653  
137.696  
137.328  
136.786  
129.586  
128.613  
128.455  
128.359  
127.635  
127.580  
123.002  
115.245

77.518  
77.200  
76.882

-52.035

-35.071

-21.648

-13.295

Title WYR3-75.11.fid  
Solvent CDCl3  
Spectrometer Frequency 100.62  
Nucleus 13C

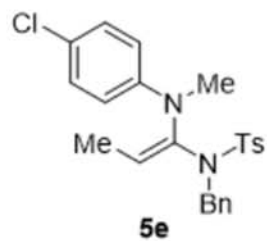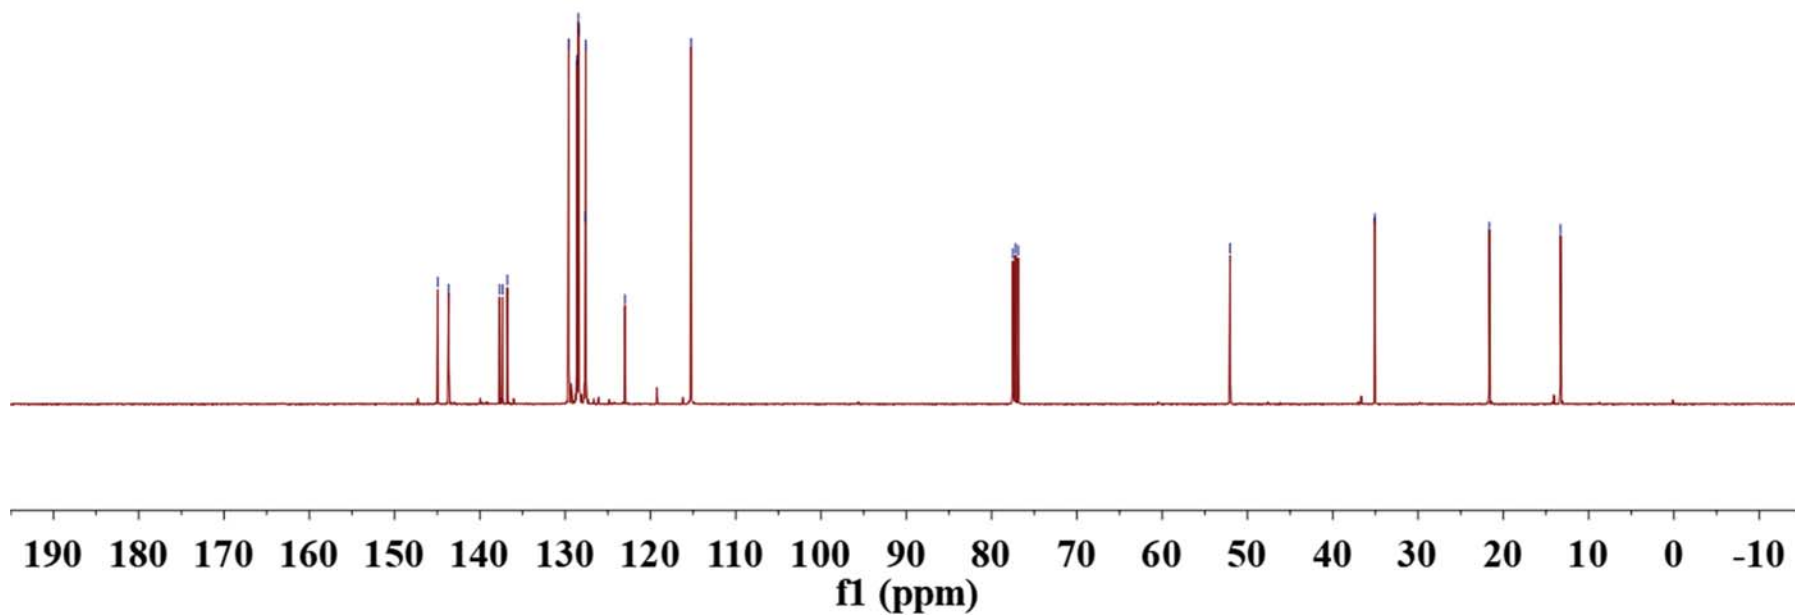

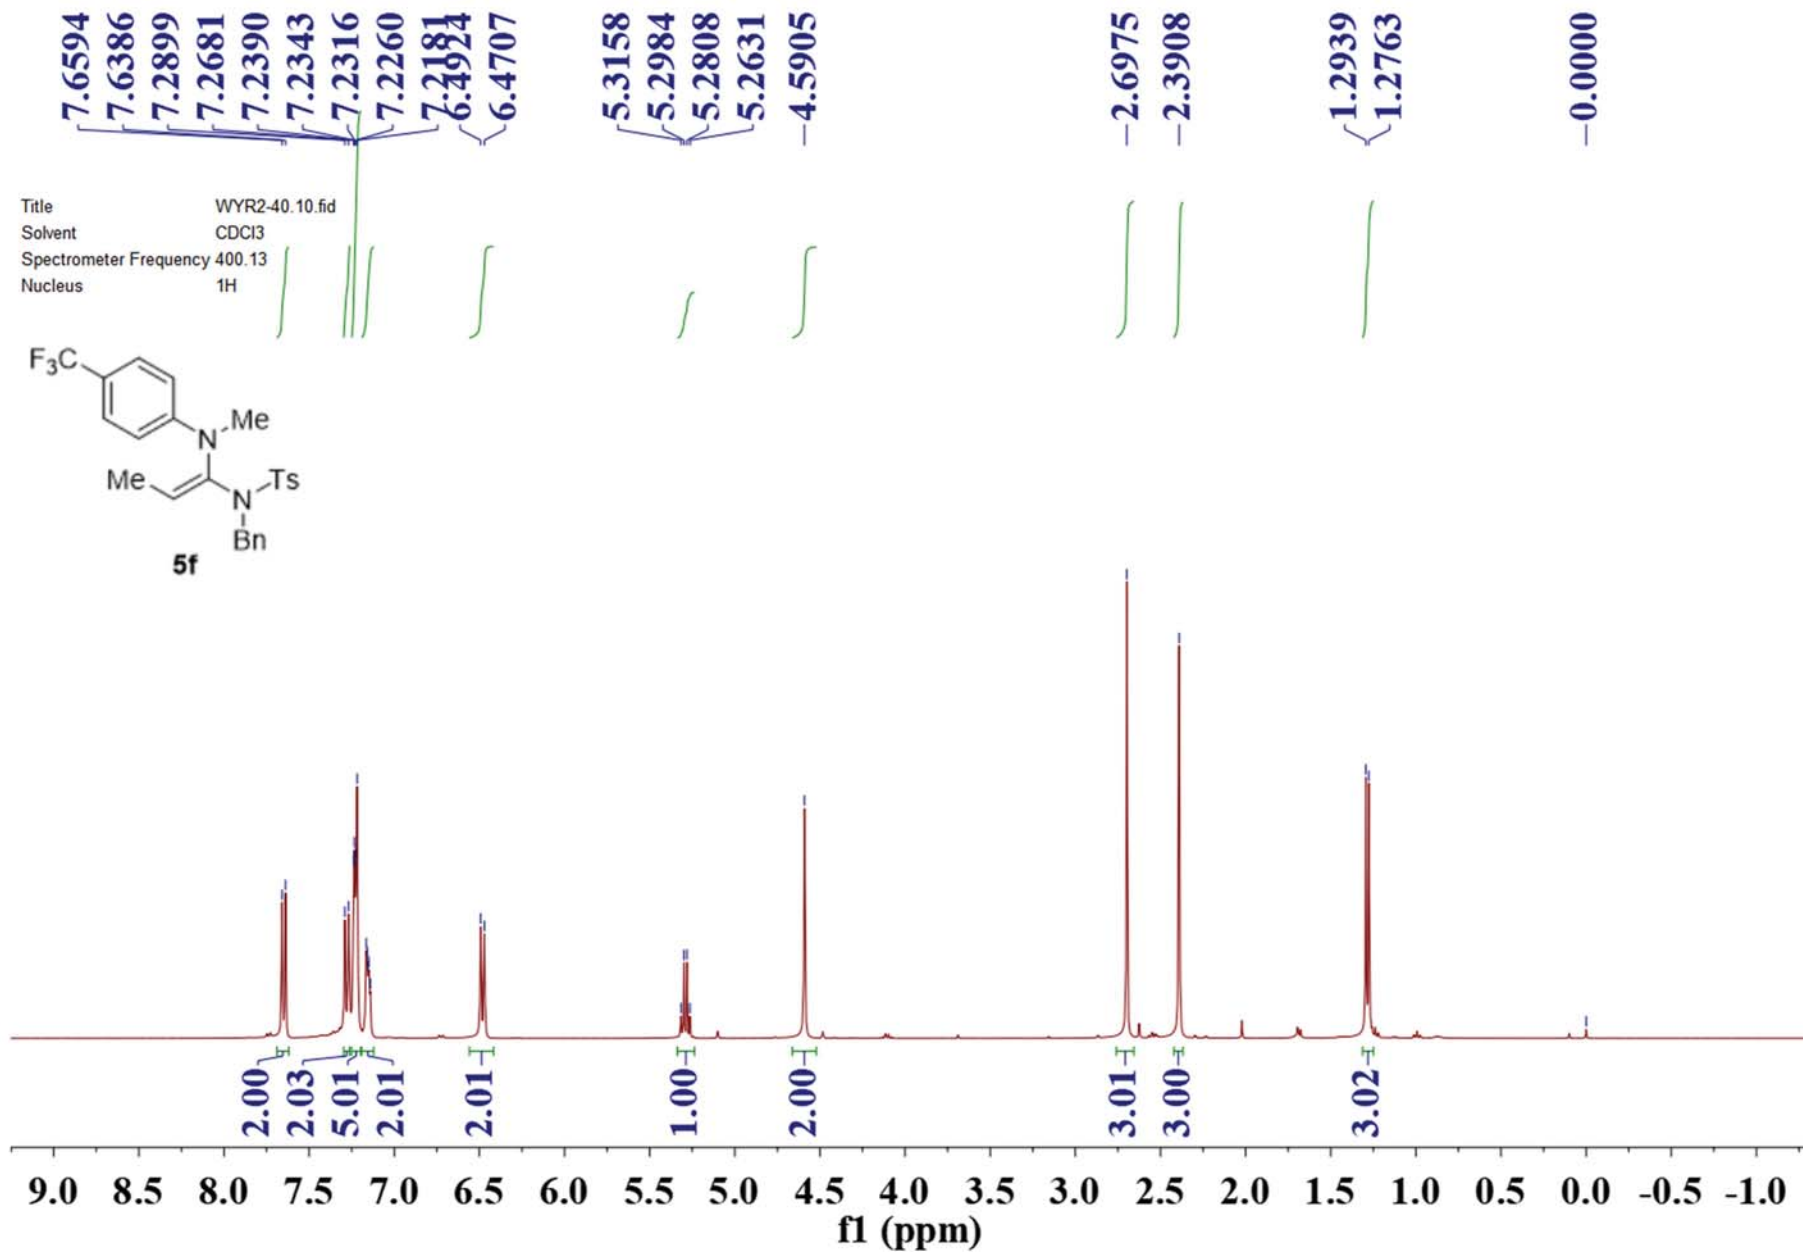

148.785  
 143.810  
 137.553  
 136.913  
 136.624  
 129.637  
 128.476  
 128.312  
 127.708  
 127.517  
 126.303  
 126.121  
 126.084  
 126.045  
 126.008  
 123.613  
 119.833  
 119.510  
 119.186  
 116.532  
 113.183  
 77.518  
 77.200  
 76.882  
  
 -52.279  
 -35.096  
 -21.578  
 -13.254

Title WYR2-40.10.fid  
 Solvent CDCl3  
 Spectrometer Frequency 100.62  
 Nucleus 13C

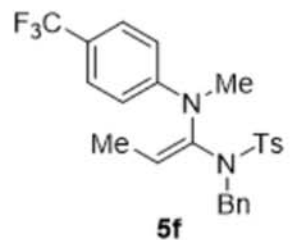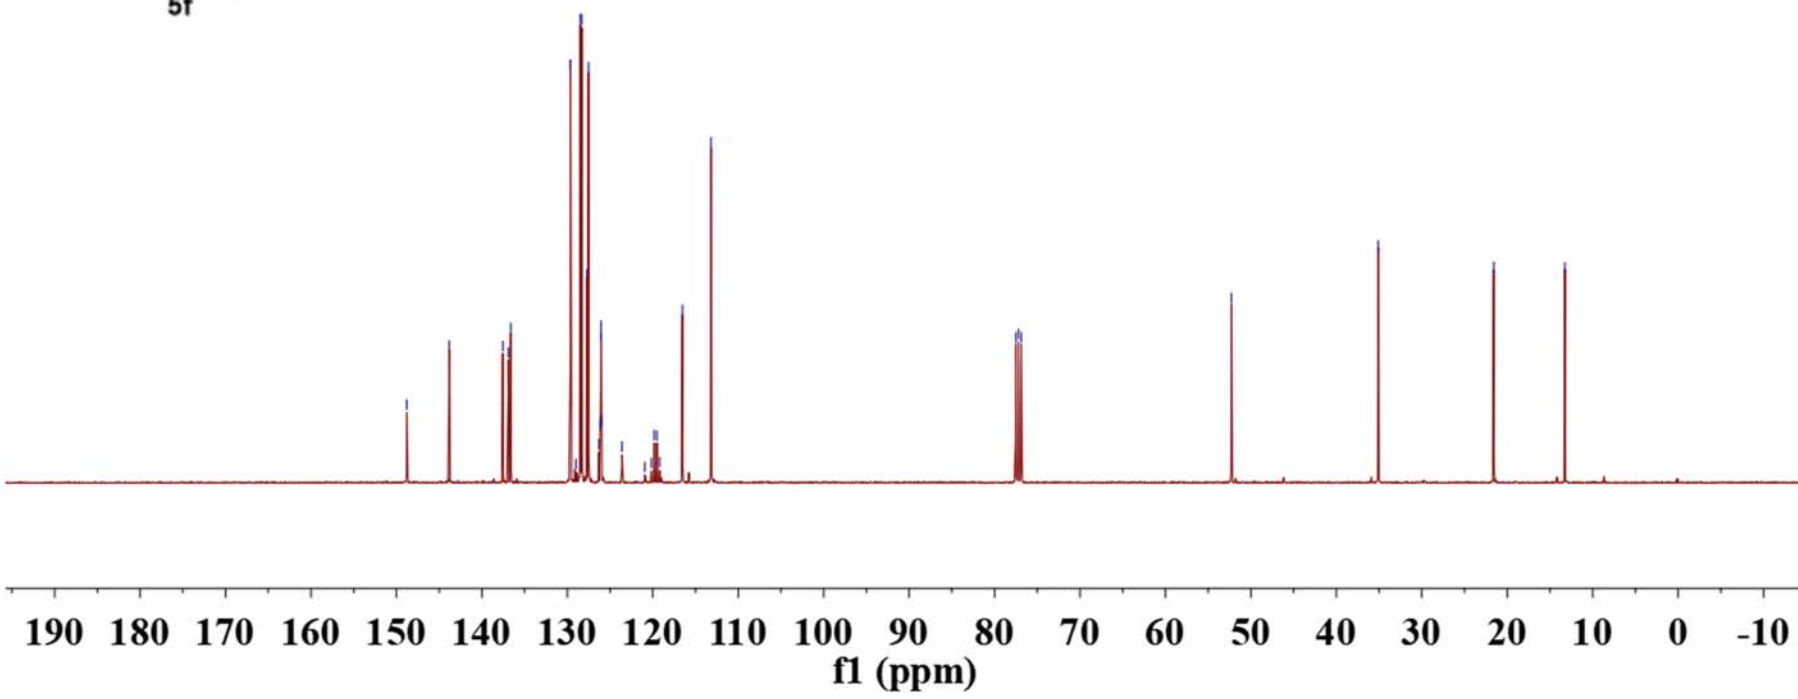

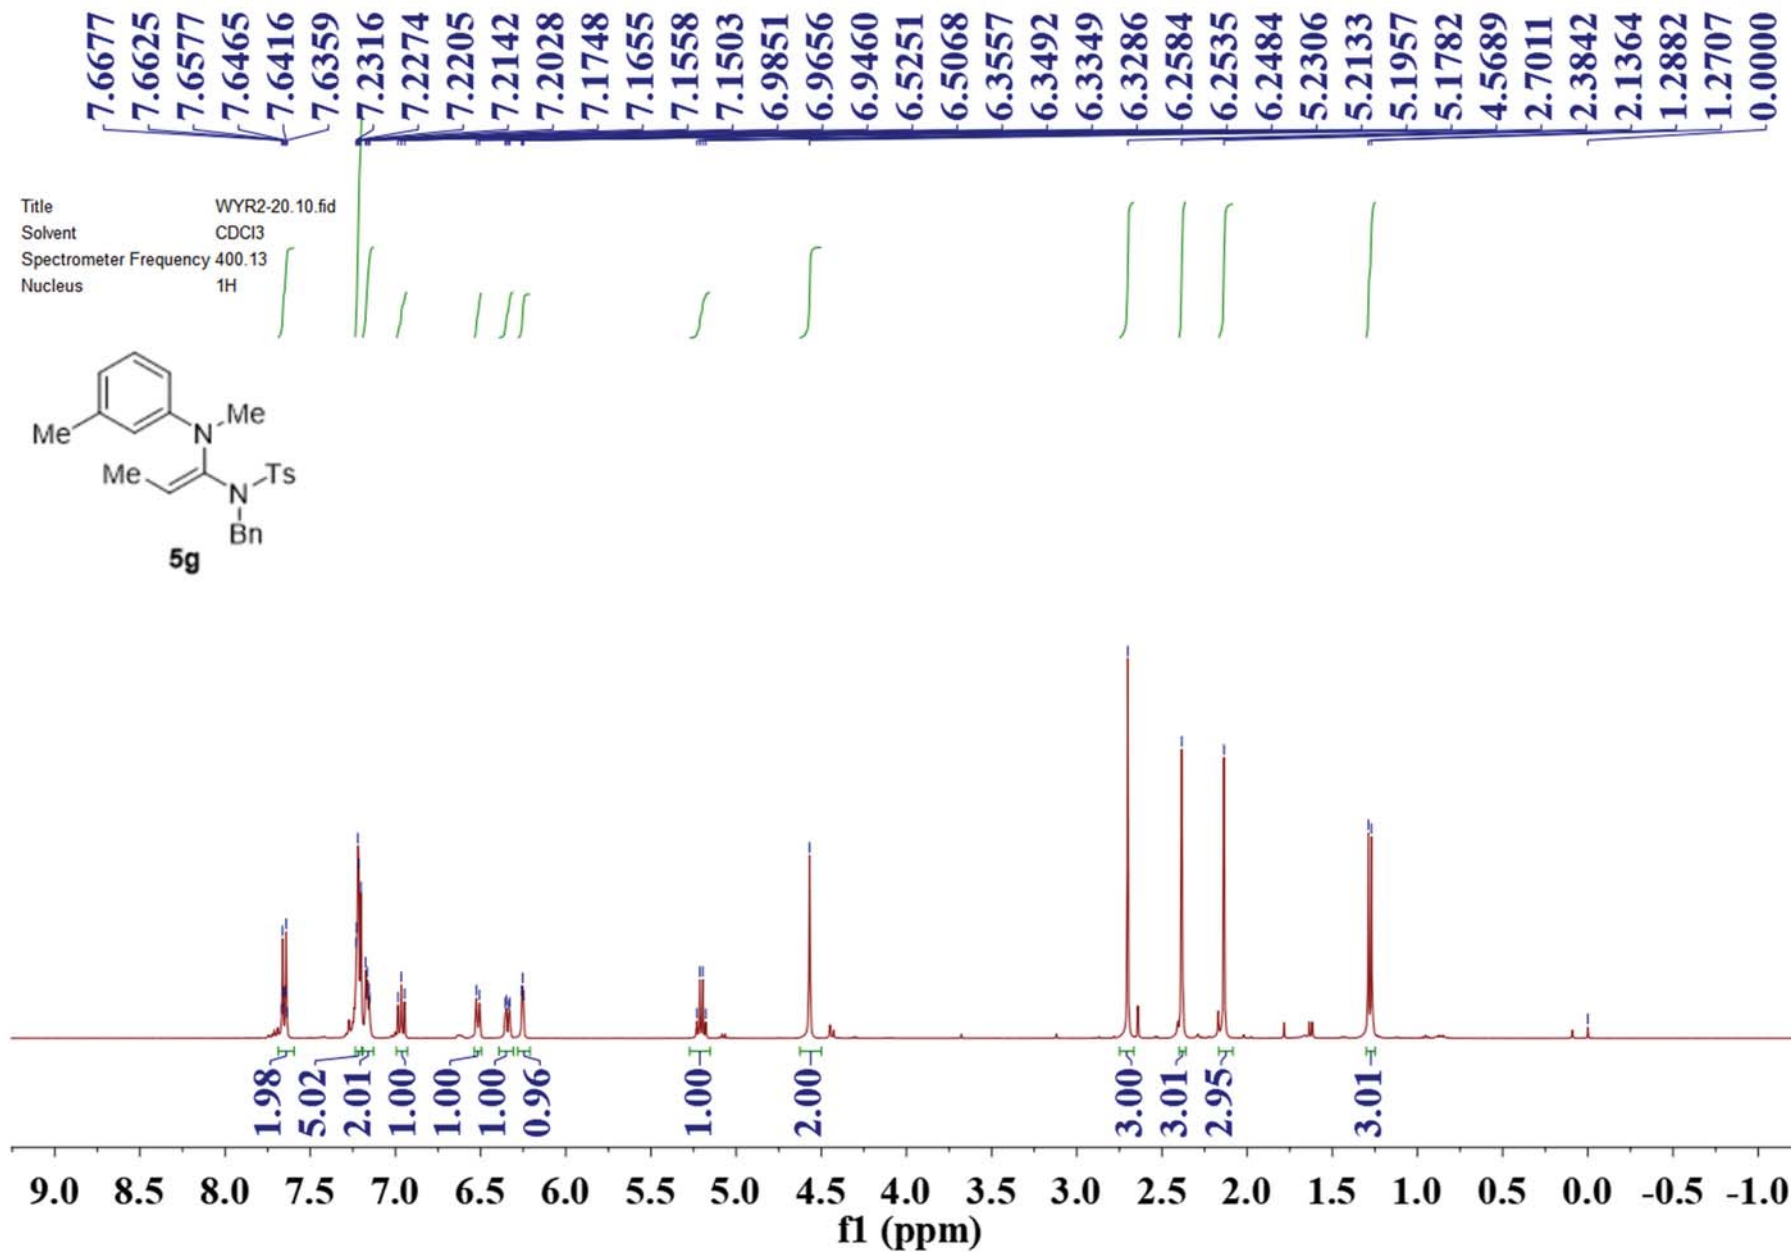

146.393  
 143.433  
 138.360  
 137.912  
 137.372  
 137.114  
 129.475  
 128.649  
 128.322  
 128.278  
 127.612  
 127.410  
 119.208  
 115.280  
 114.972  
 111.174  
 77.518  
 77.200  
 76.882  
 -51.362  
 -34.977  
 21.792  
 21.598  
 13.283

Title WYR2-20.10.fid  
 Solvent CDCl3  
 Spectrometer Frequency 100.62  
 Nucleus 13C

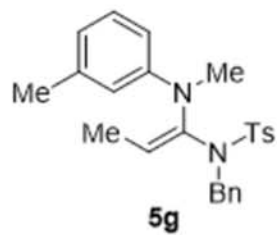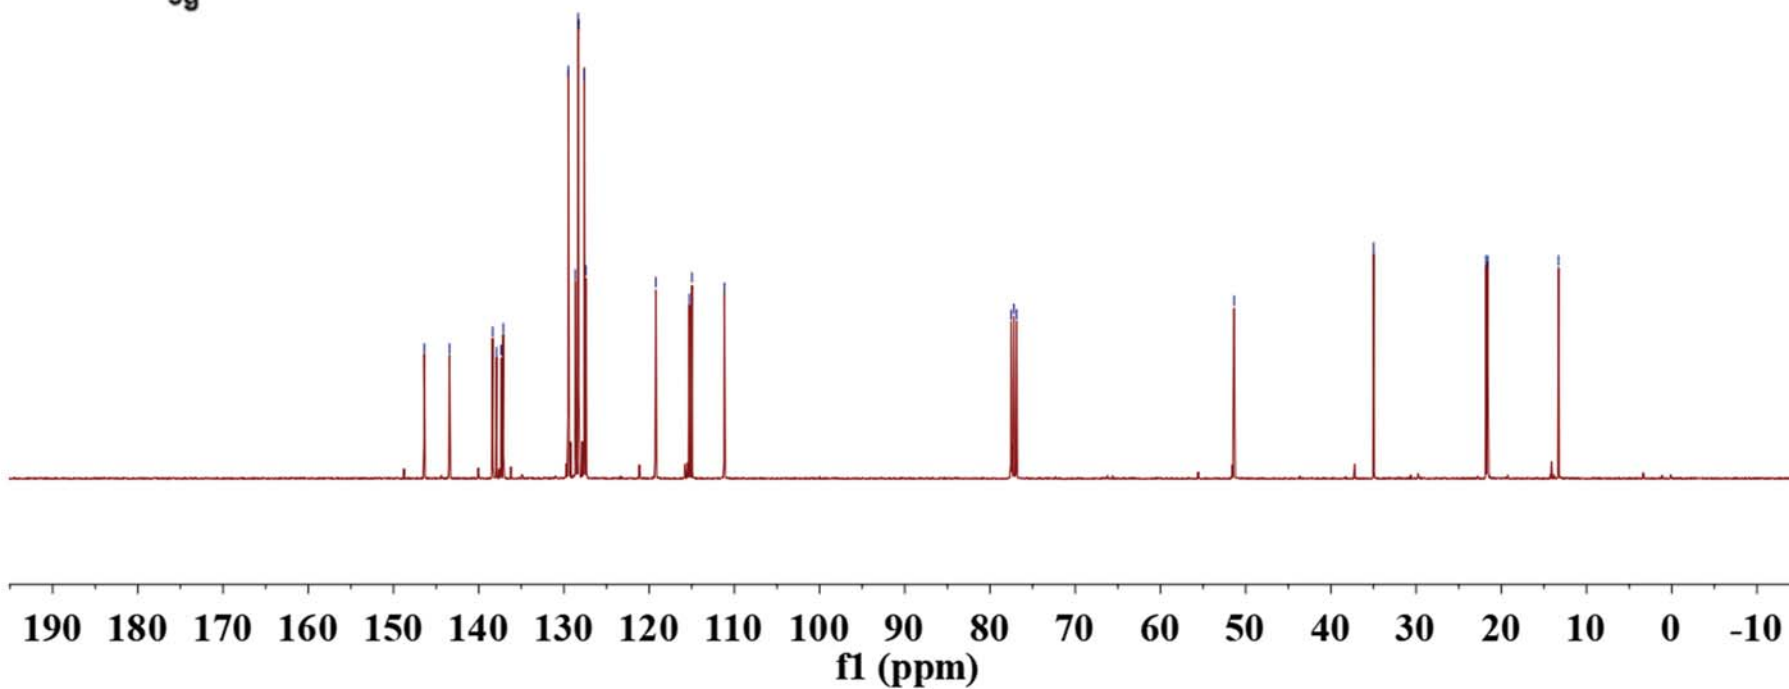

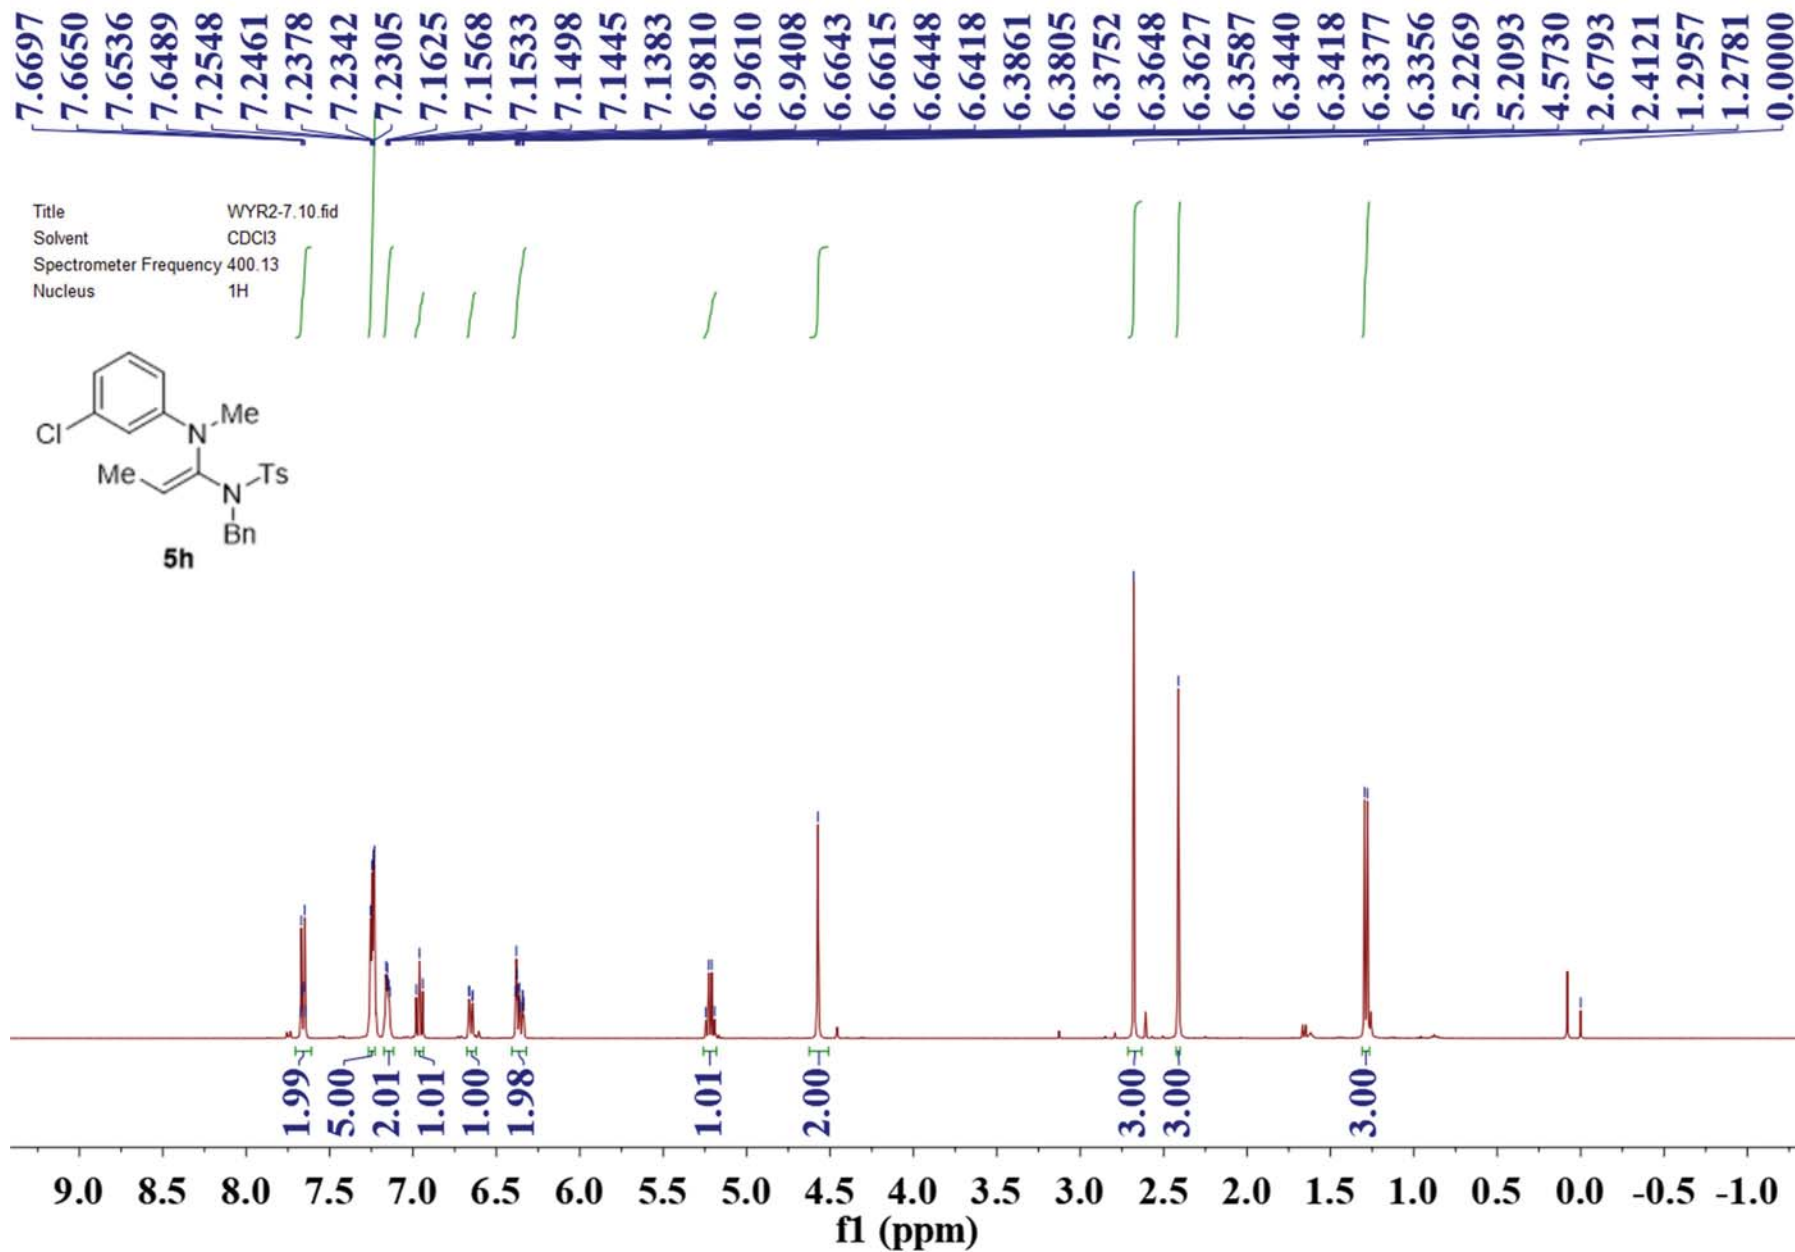

147.468  
 143.713  
 137.698  
 136.998  
 136.656  
 134.702  
 129.775  
 129.634  
 128.494  
 128.389  
 127.736  
 127.608  
 118.163  
 116.119  
 113.899  
 112.106  
 77.518  
 77.200  
 76.882  
 -52.089  
 -35.102  
 -21.691  
 -13.337

Title WYR2-7.10.fid  
 Solvent CDCl3  
 Spectrometer Frequency 100.62  
 Nucleus 13C

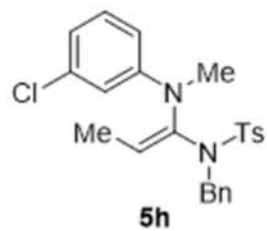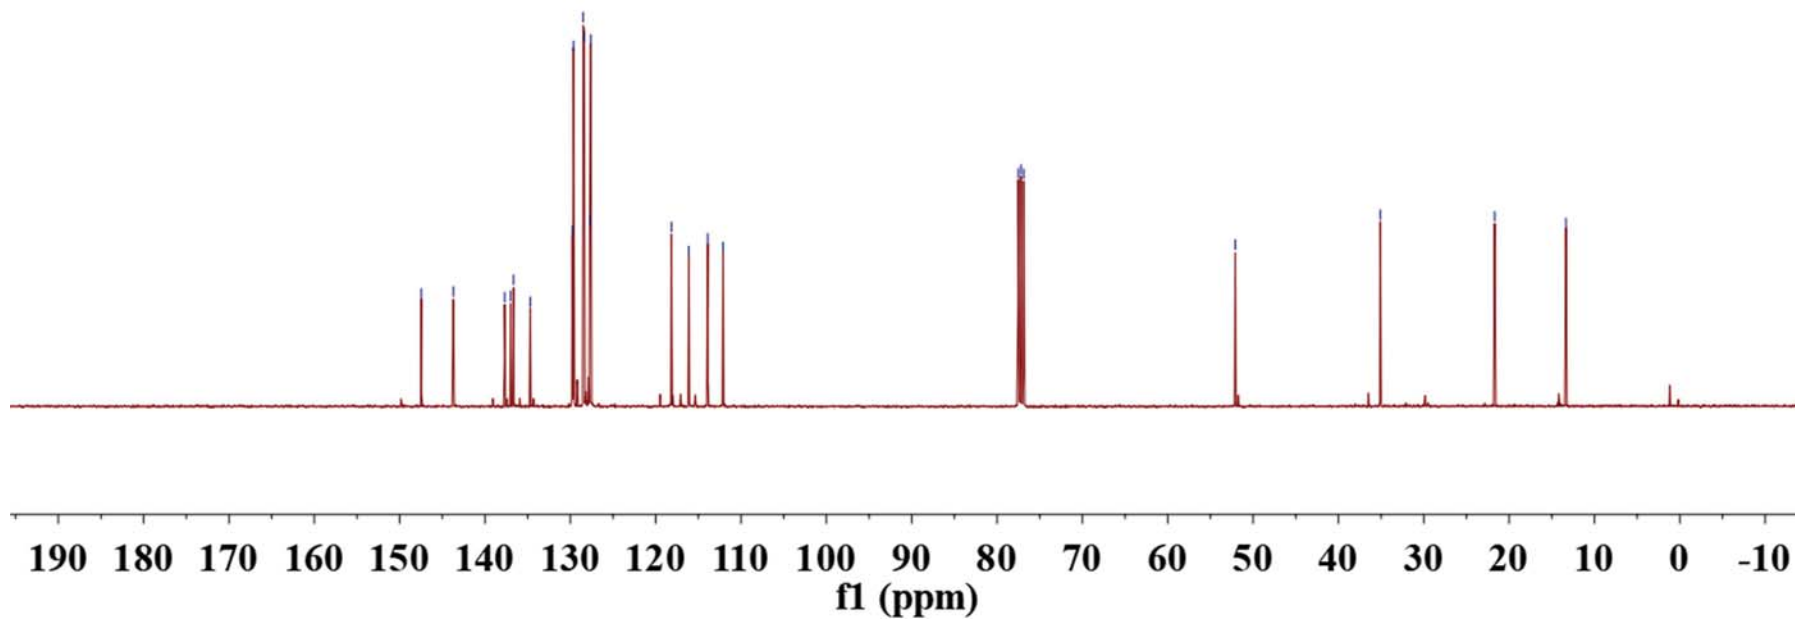

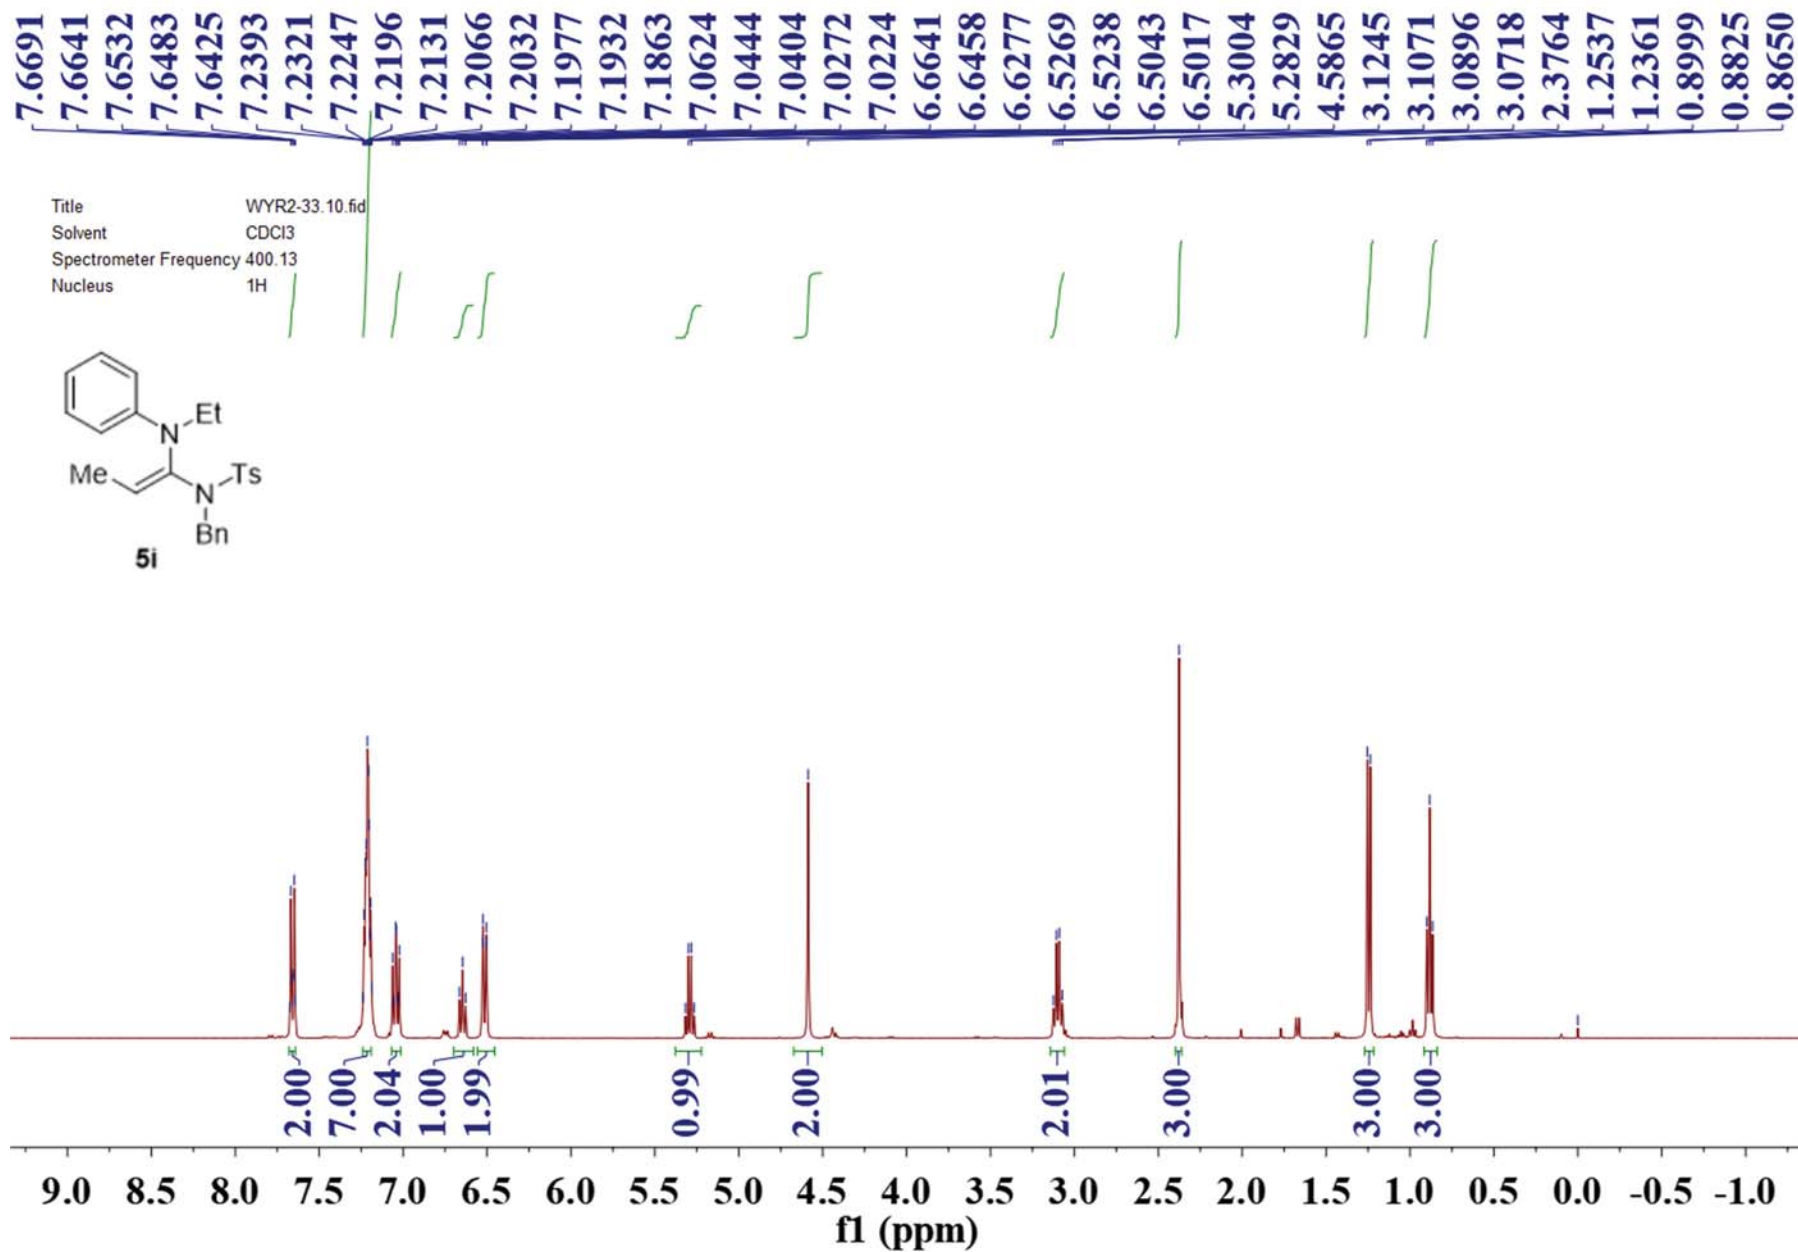



145.431  
143.431  
137.714  
137.156  
135.738  
129.428  
128.877  
128.430  
128.324  
127.723  
127.412  
117.858  
116.360  
113.780  
  
77.519  
77.200  
76.881  
  
-51.197  
-40.597  
  
-21.543  
13.537  
-12.017

Title WYR2-33/ 10  
Solvent CDCl3  
Spectrometer Frequency 100.62  
Nucleus 13C

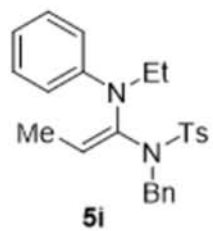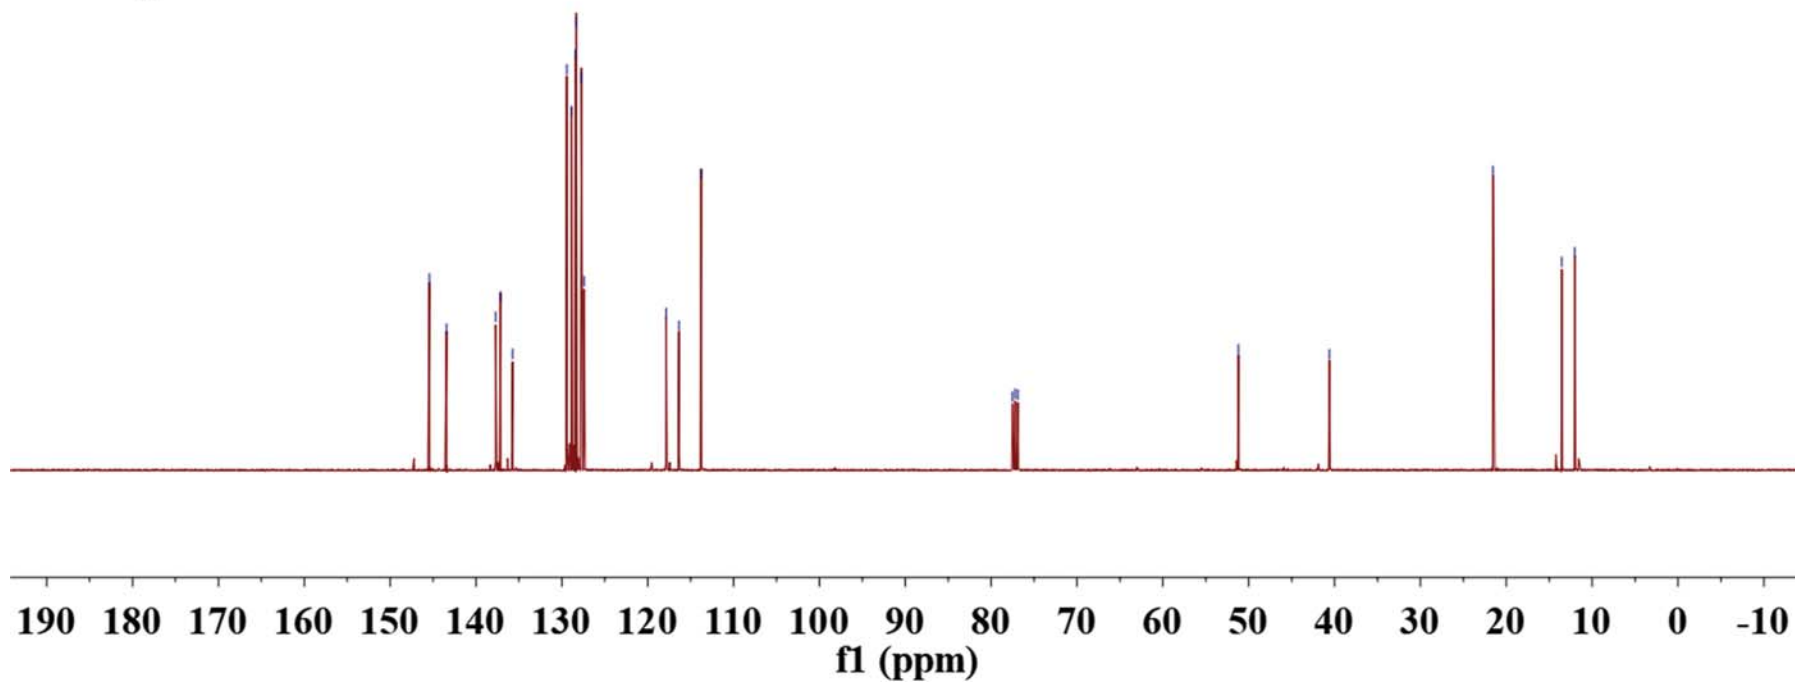

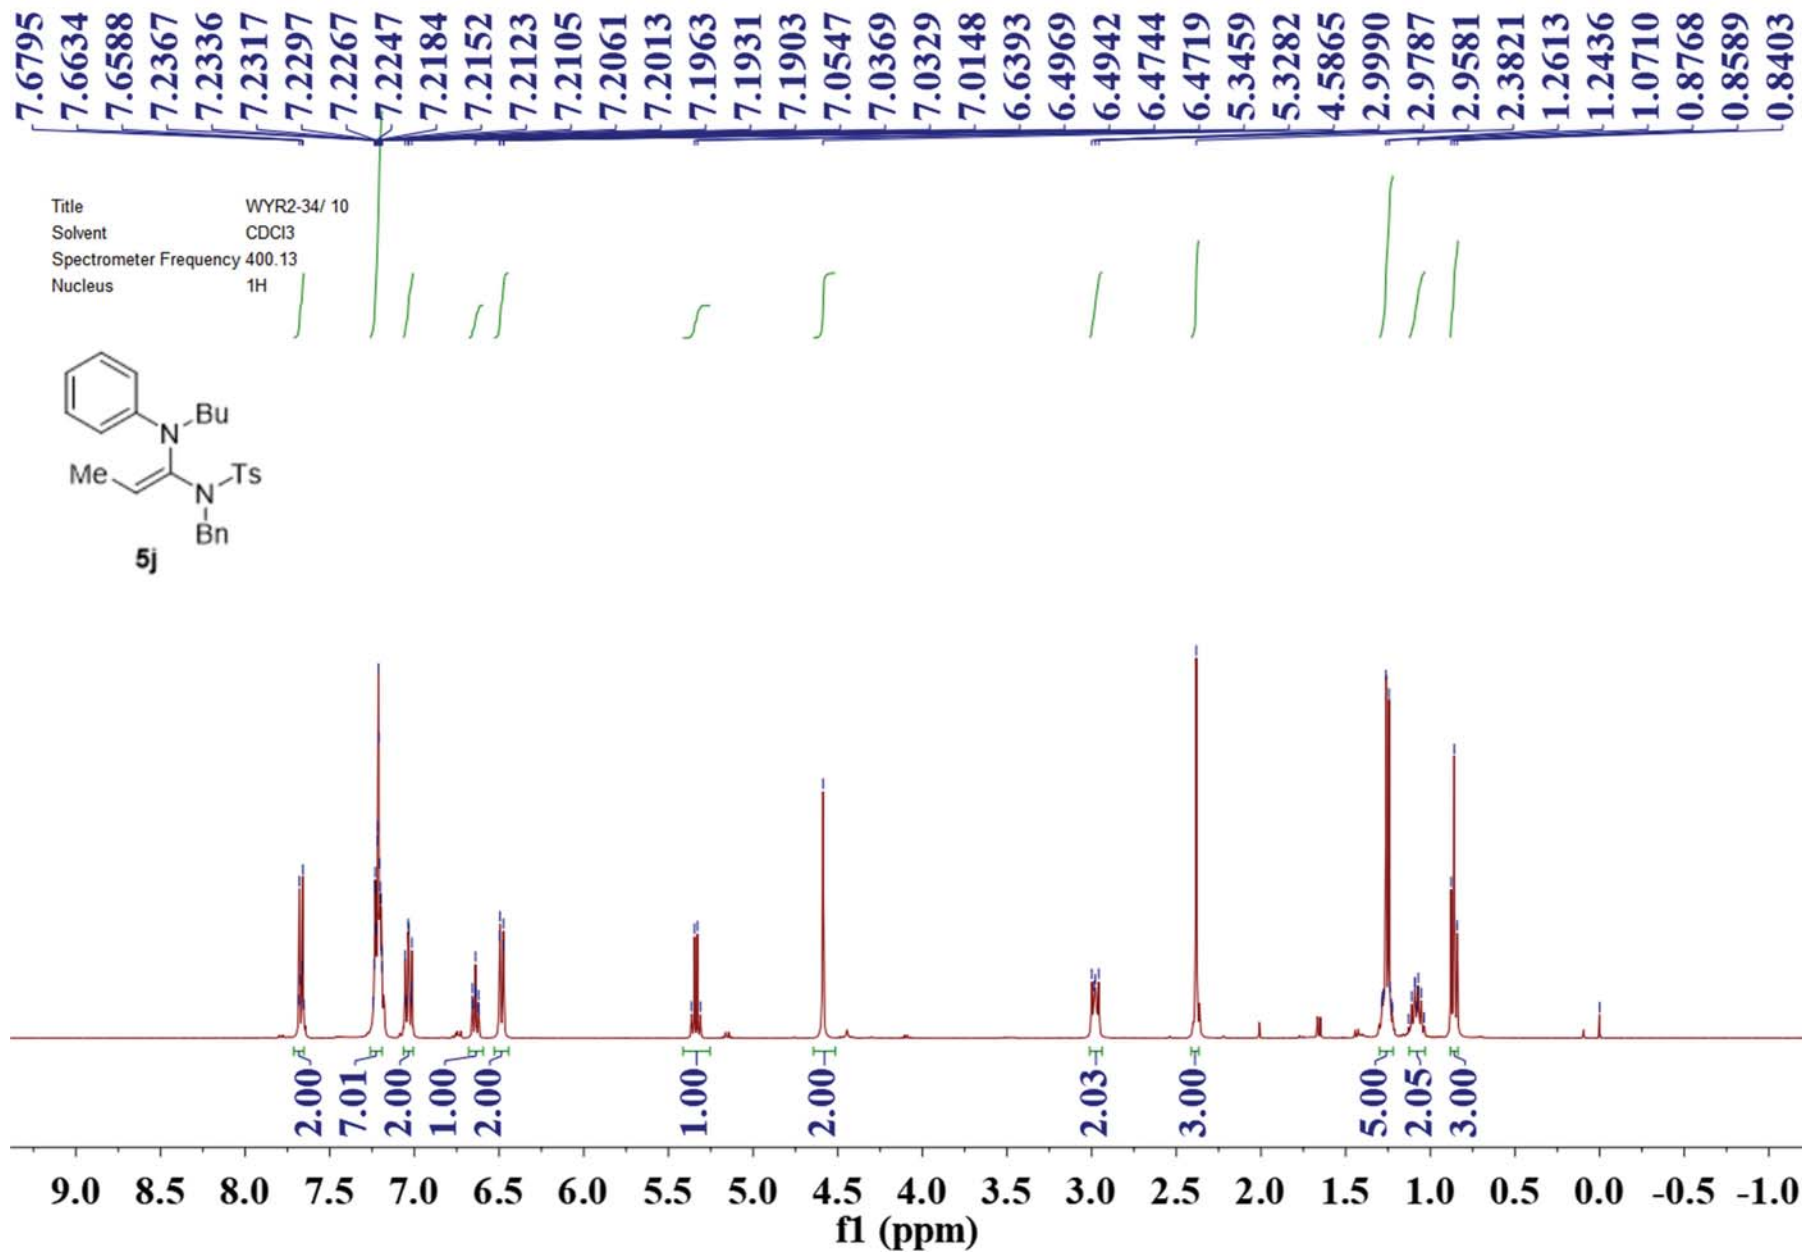

145.614  
 143.454  
 137.660  
 137.217  
 135.807  
 129.439  
 128.848  
 128.427  
 128.324  
 127.780  
 127.397  
 117.795  
 116.153  
 113.669  
 77.518  
 77.200  
 76.882  
 -51.068  
 -46.149  
 28.953  
 21.545  
 20.142  
 13.997  
 13.565

Title WYR2-34.10.fid  
 Solvent CDCl3  
 Spectrometer Frequency 100.62  
 Nucleus 13C

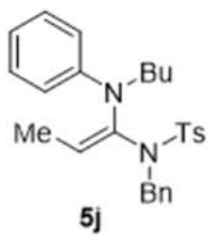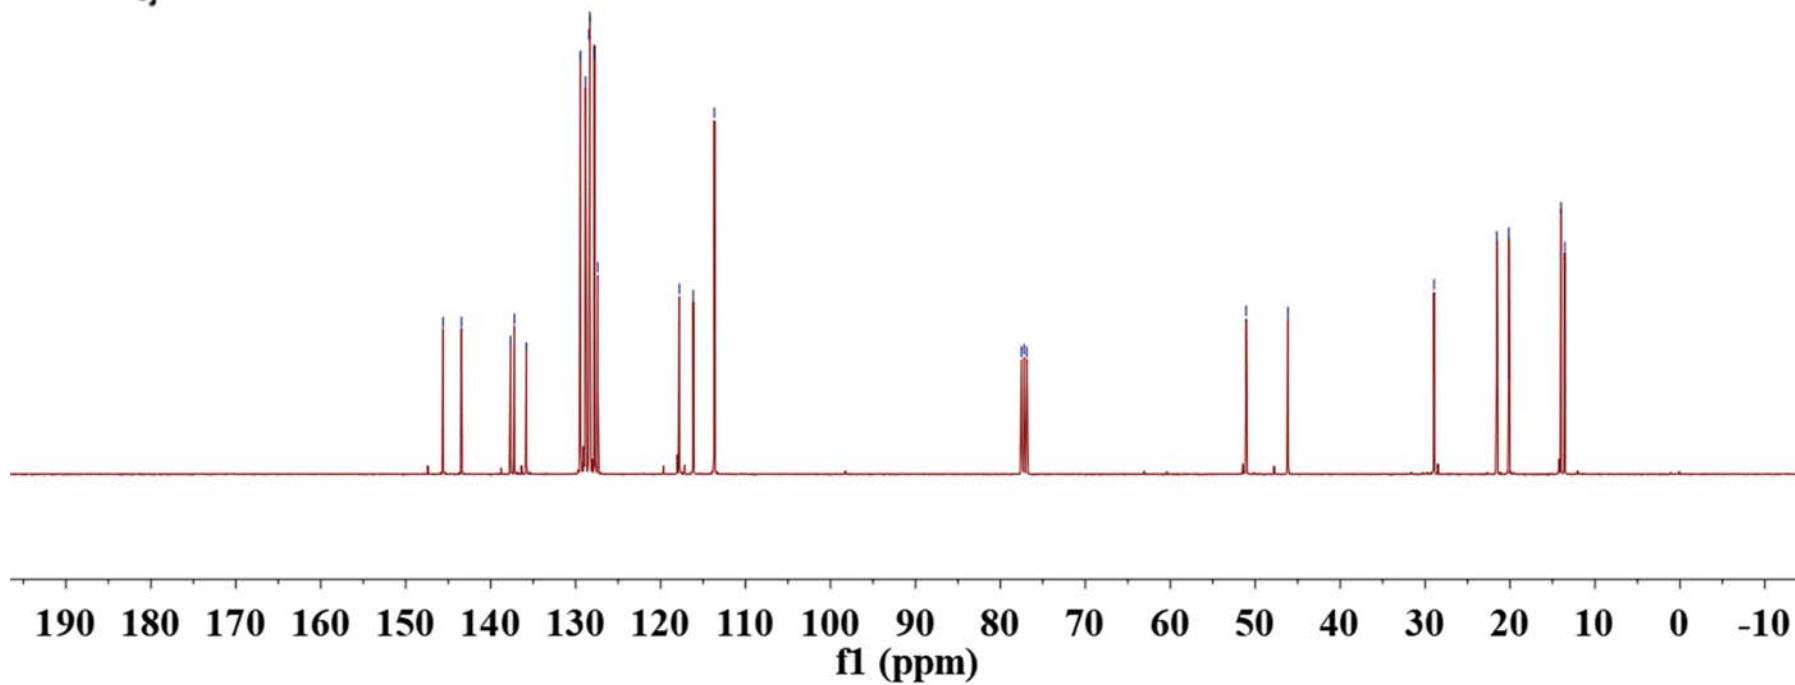

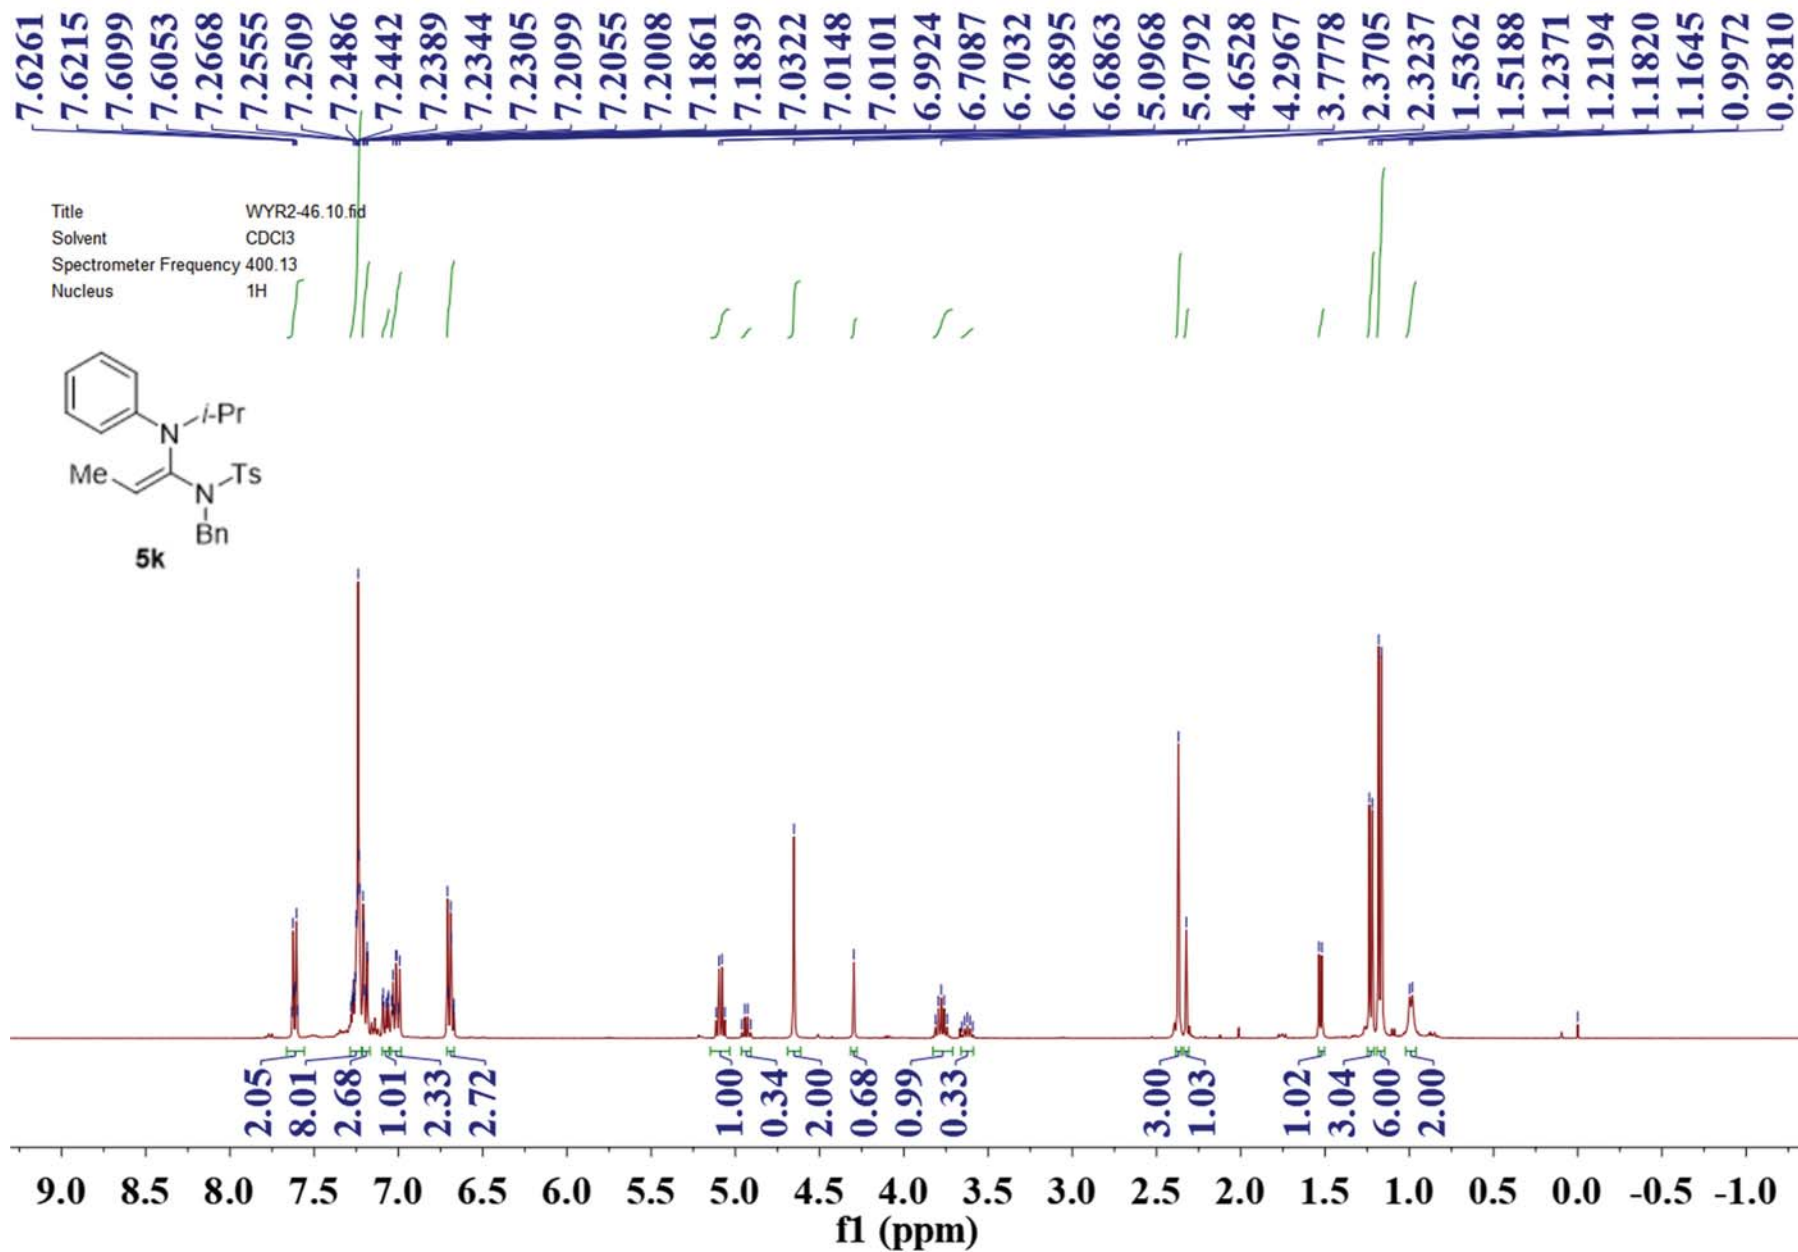

145.265  
 143.344  
 138.827  
 137.795  
 137.530  
 129.375  
 129.269  
 129.251  
 128.707  
 128.660  
 128.541  
 128.442  
 128.161  
 128.098  
 127.835  
 127.804  
 127.681  
 127.341  
 125.009  
 119.234  
 119.011  
 114.016  
 77.518  
 77.200  
 56.881  
 51.524  
 51.224  
 50.770  
 48.425  
 21.533  
 21.468  
 20.171  
 13.768  
 13.201

Title WYR2-46.10.fid  
 Solvent CDCl3  
 Spectrometer Frequency 100.62  
 Nucleus 13C

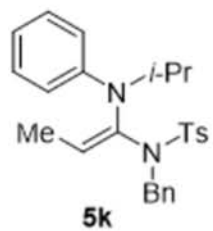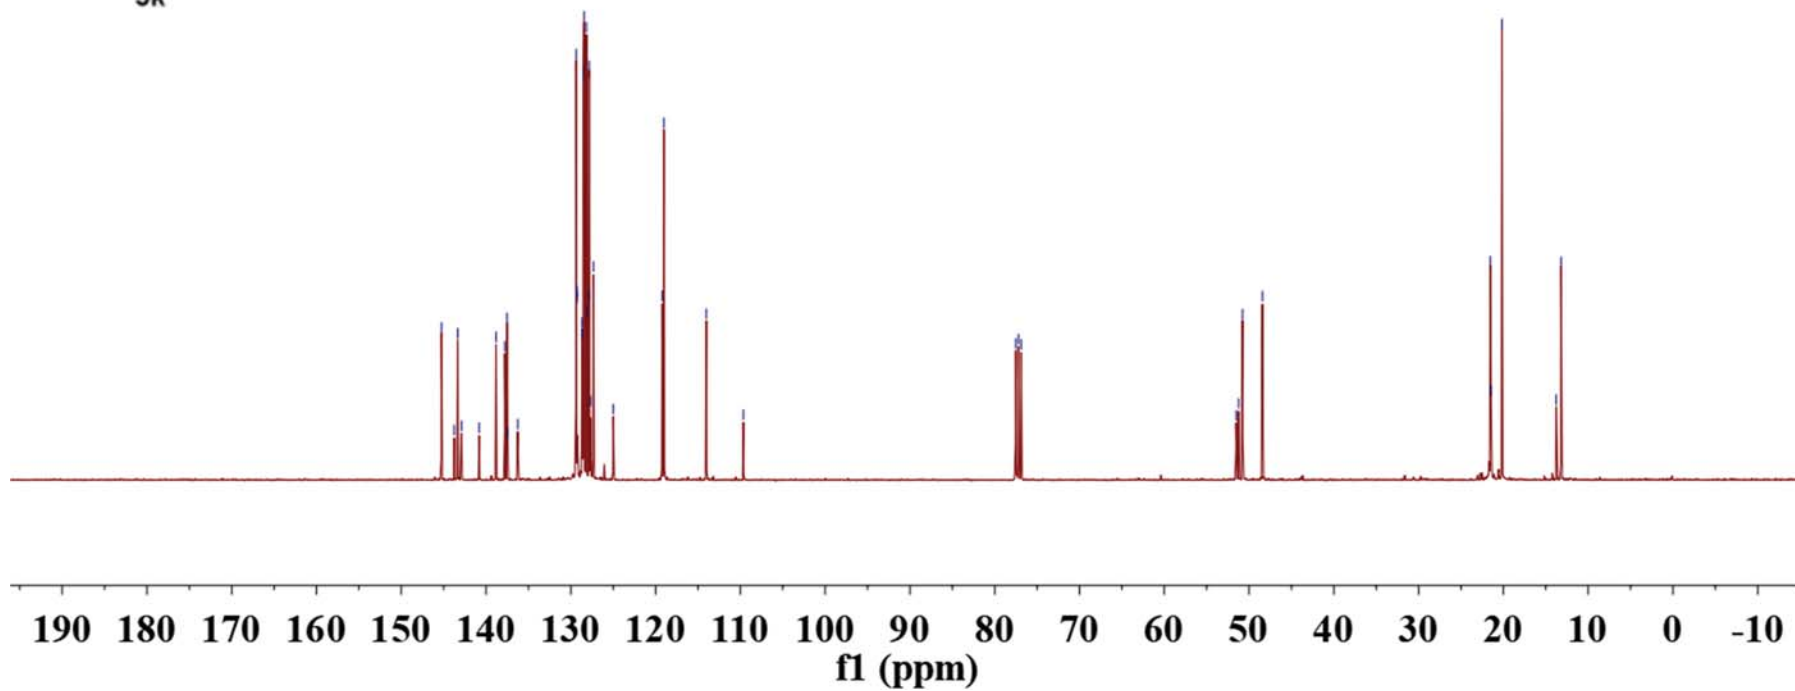

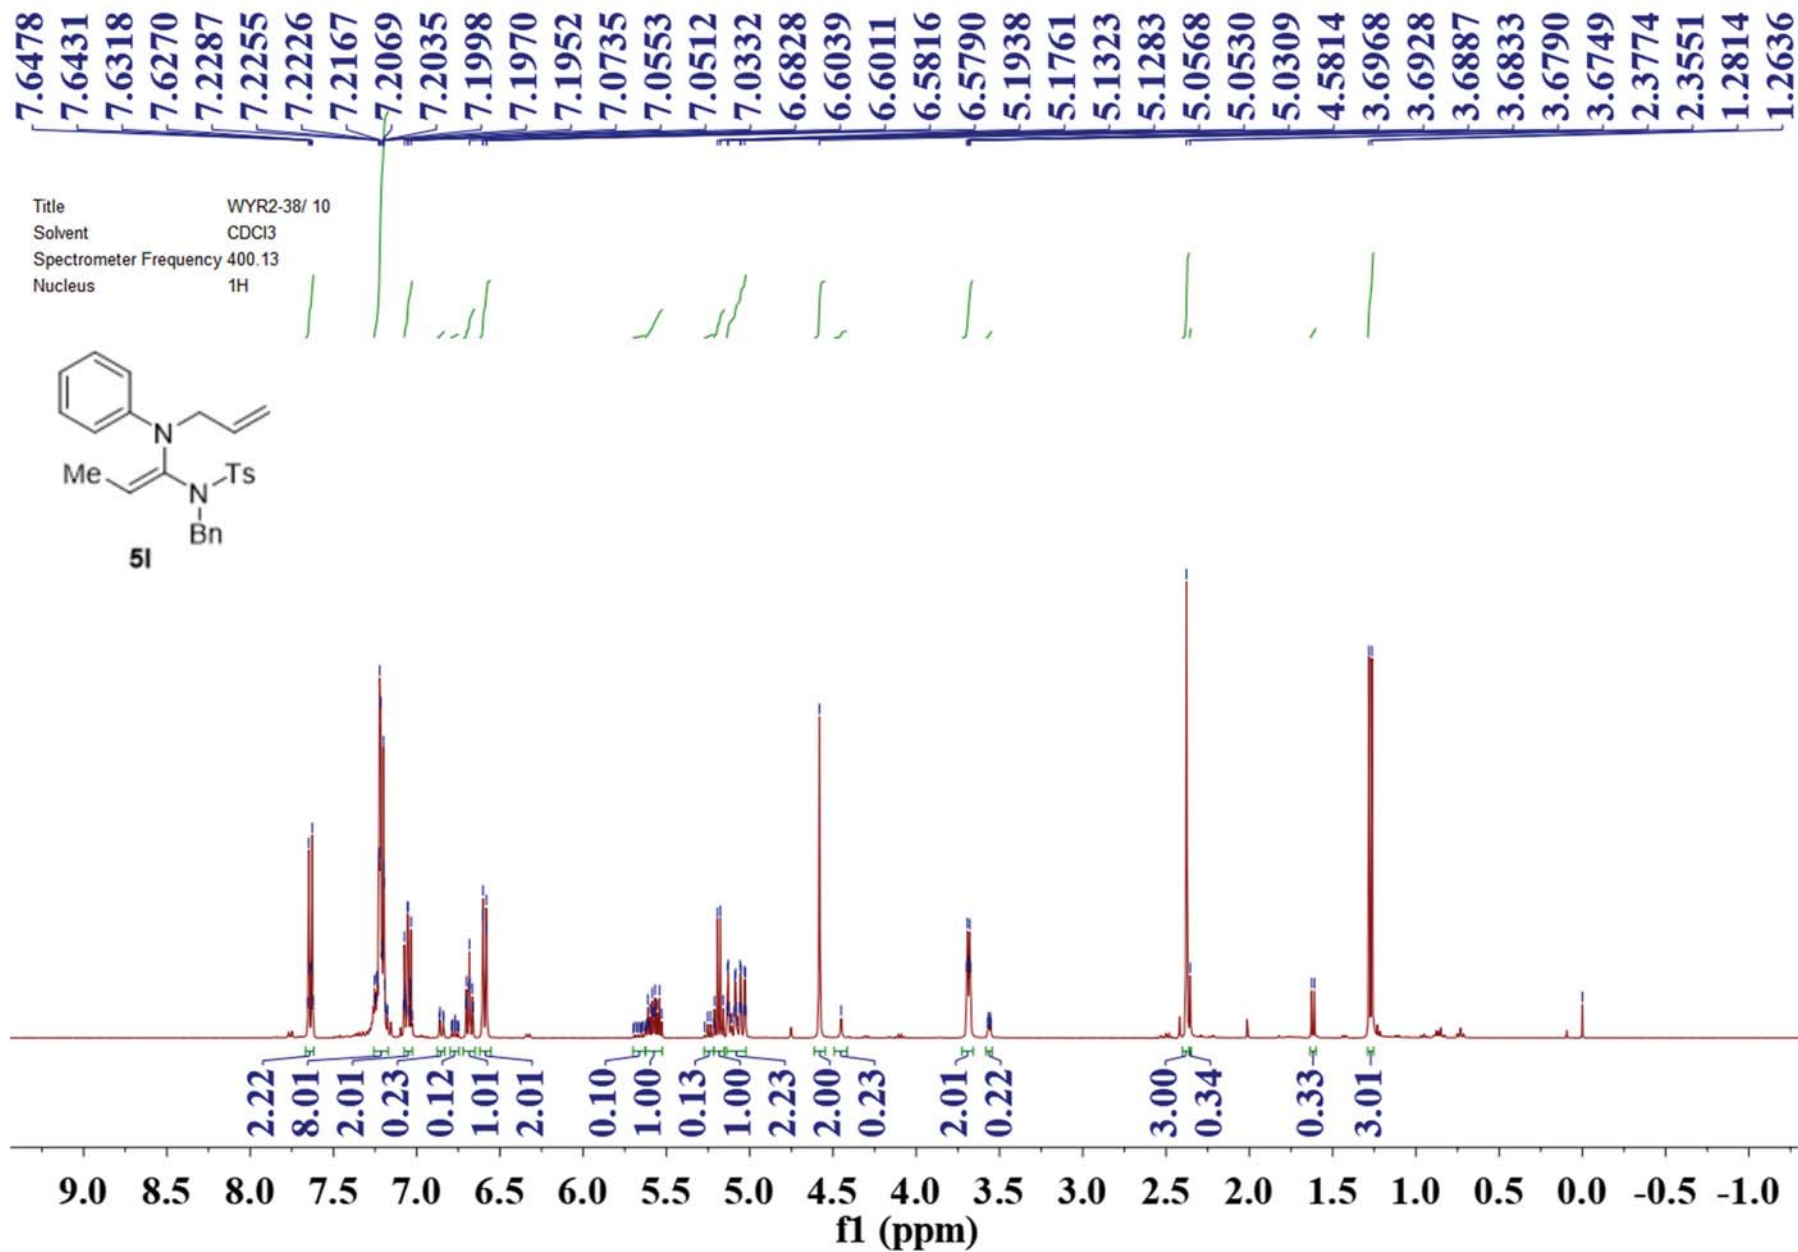

147.737  
 145.875  
 143.494  
 137.578  
 136.979  
 136.363  
 136.251  
 134.384  
 134.280  
 129.503  
 129.445  
 129.340  
 128.770  
 128.628  
 128.569  
 128.390  
 128.319  
 127.785  
 127.751  
 127.693  
 127.528  
 119.967  
 118.509  
 118.301  
 117.139  
 116.659  
 116.394  
 115.933  
 114.753  
 77.518  
 77.200  
 76.882  
 52.015  
 51.781  
 50.388  
 49.412  
 21.576  
 21.557  
 14.094  
 13.713

Title WYR2-38.10.fid  
 Solvent CDCl3  
 Spectrometer Frequency 100.62  
 Nucleus 13C

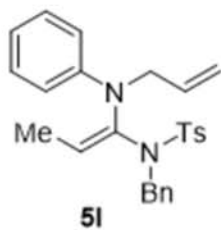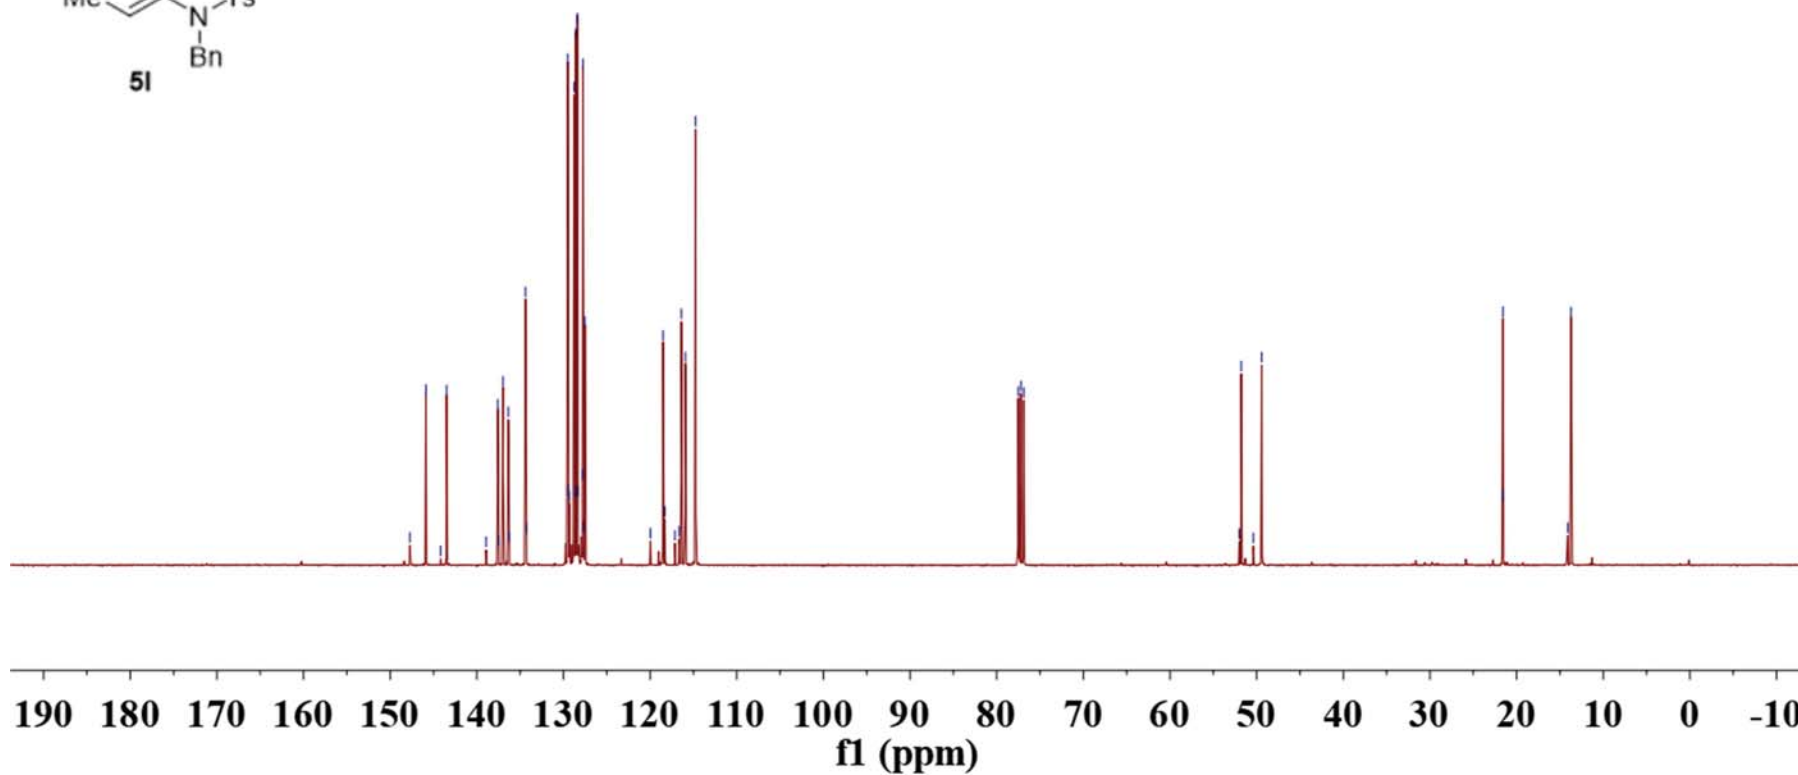

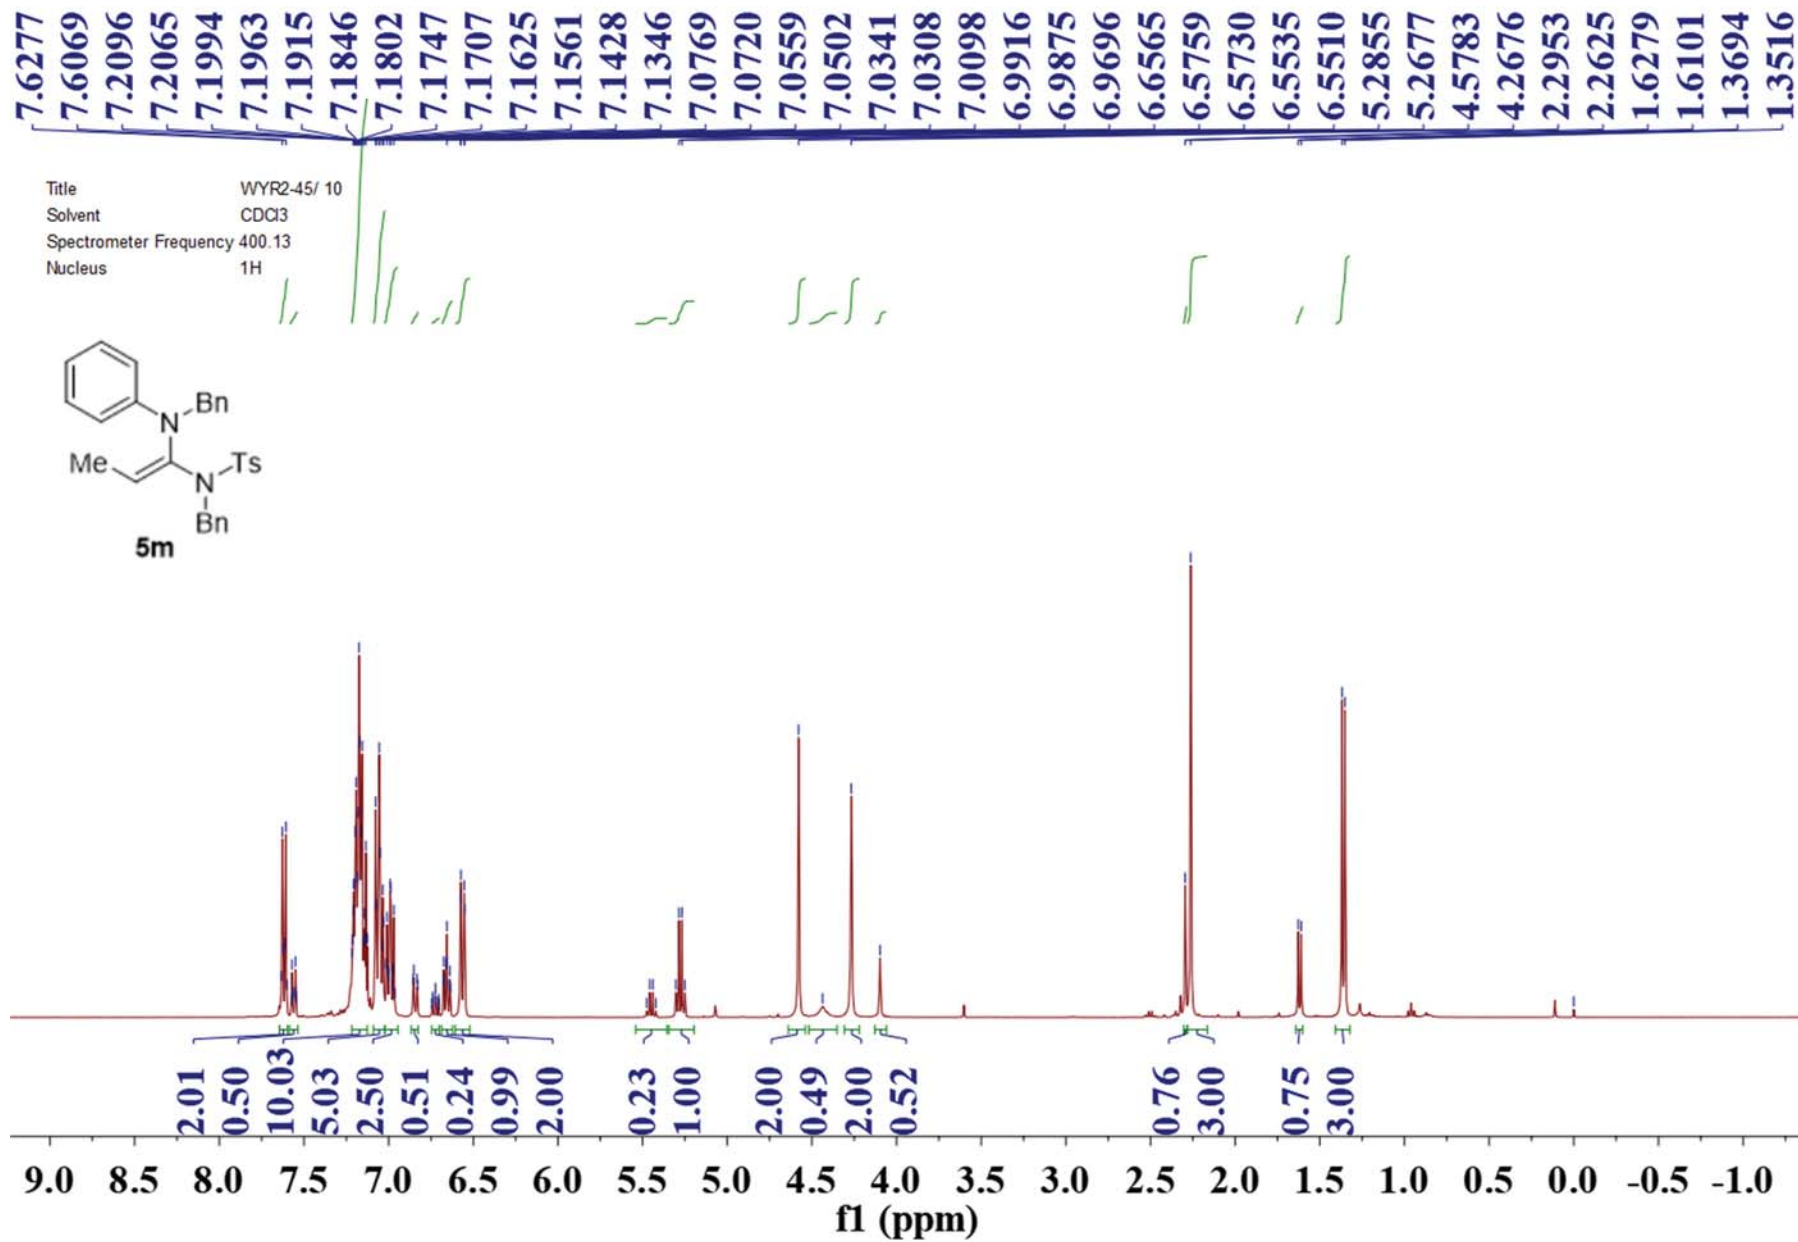



148.059  
 146.193  
 143.568  
 143.471  
 139.481  
 139.012  
 136.979  
 136.658  
 136.420  
 129.491  
 129.462  
 129.376  
 128.703  
 128.654  
 128.408  
 128.367  
 128.326  
 128.272  
 127.954  
 127.728  
 127.682  
 127.598  
 126.709  
 126.596  
 126.411  
 119.875  
 118.831  
 117.781  
 117.751  
 115.960  
 115.061  
 77.518  
 77.200  
 76.882  
 52.243  
 51.879  
 51.030  
 21.553  
 14.150  
 14.062

Title WYR2-45.10.fid  
 Solvent CDCl3  
 Spectrometer Frequency 100.62  
 Nucleus 13C

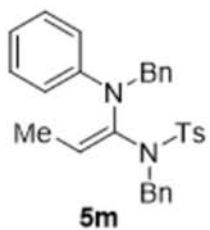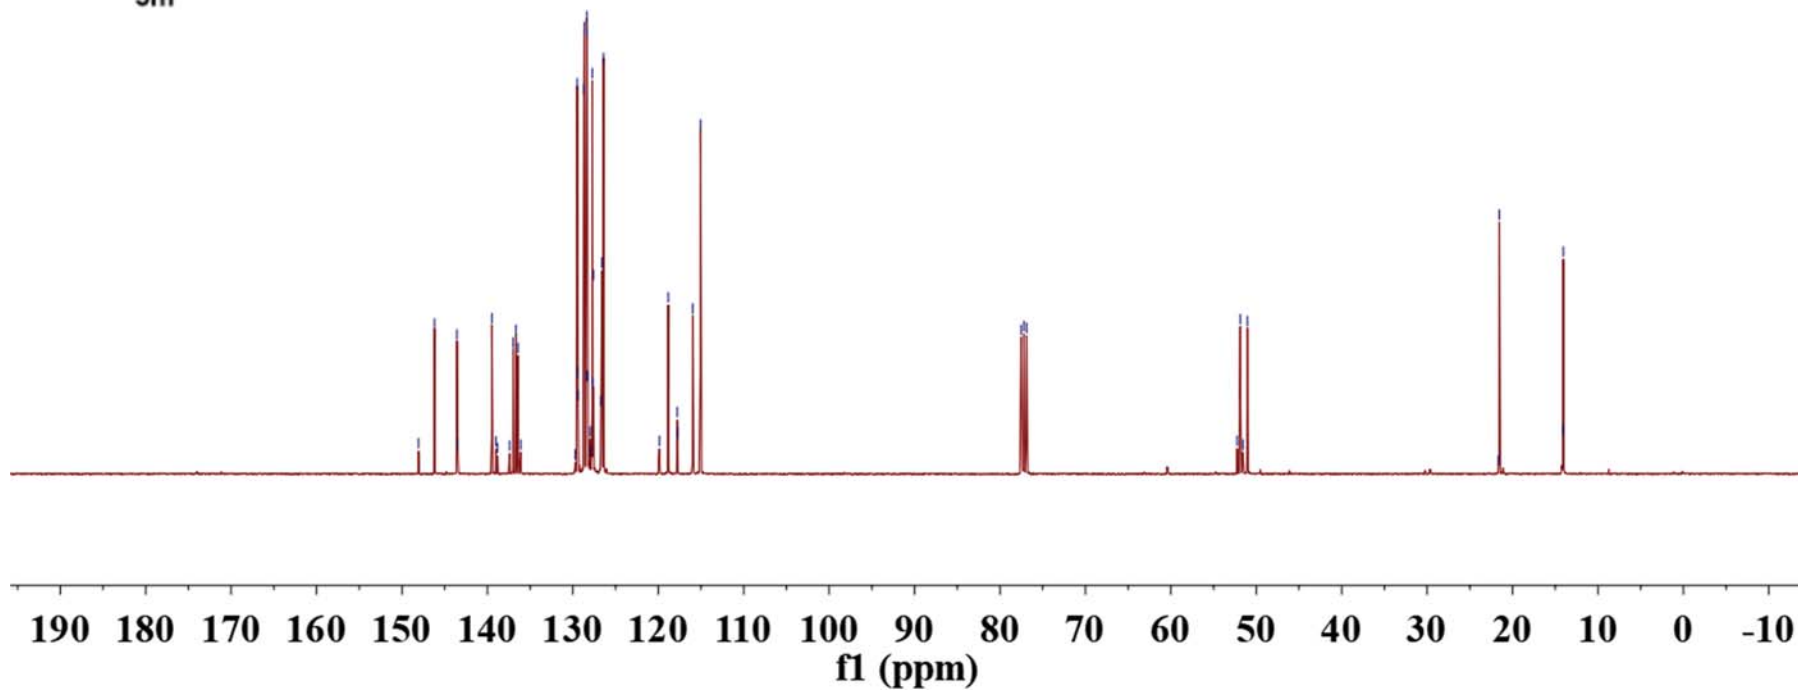

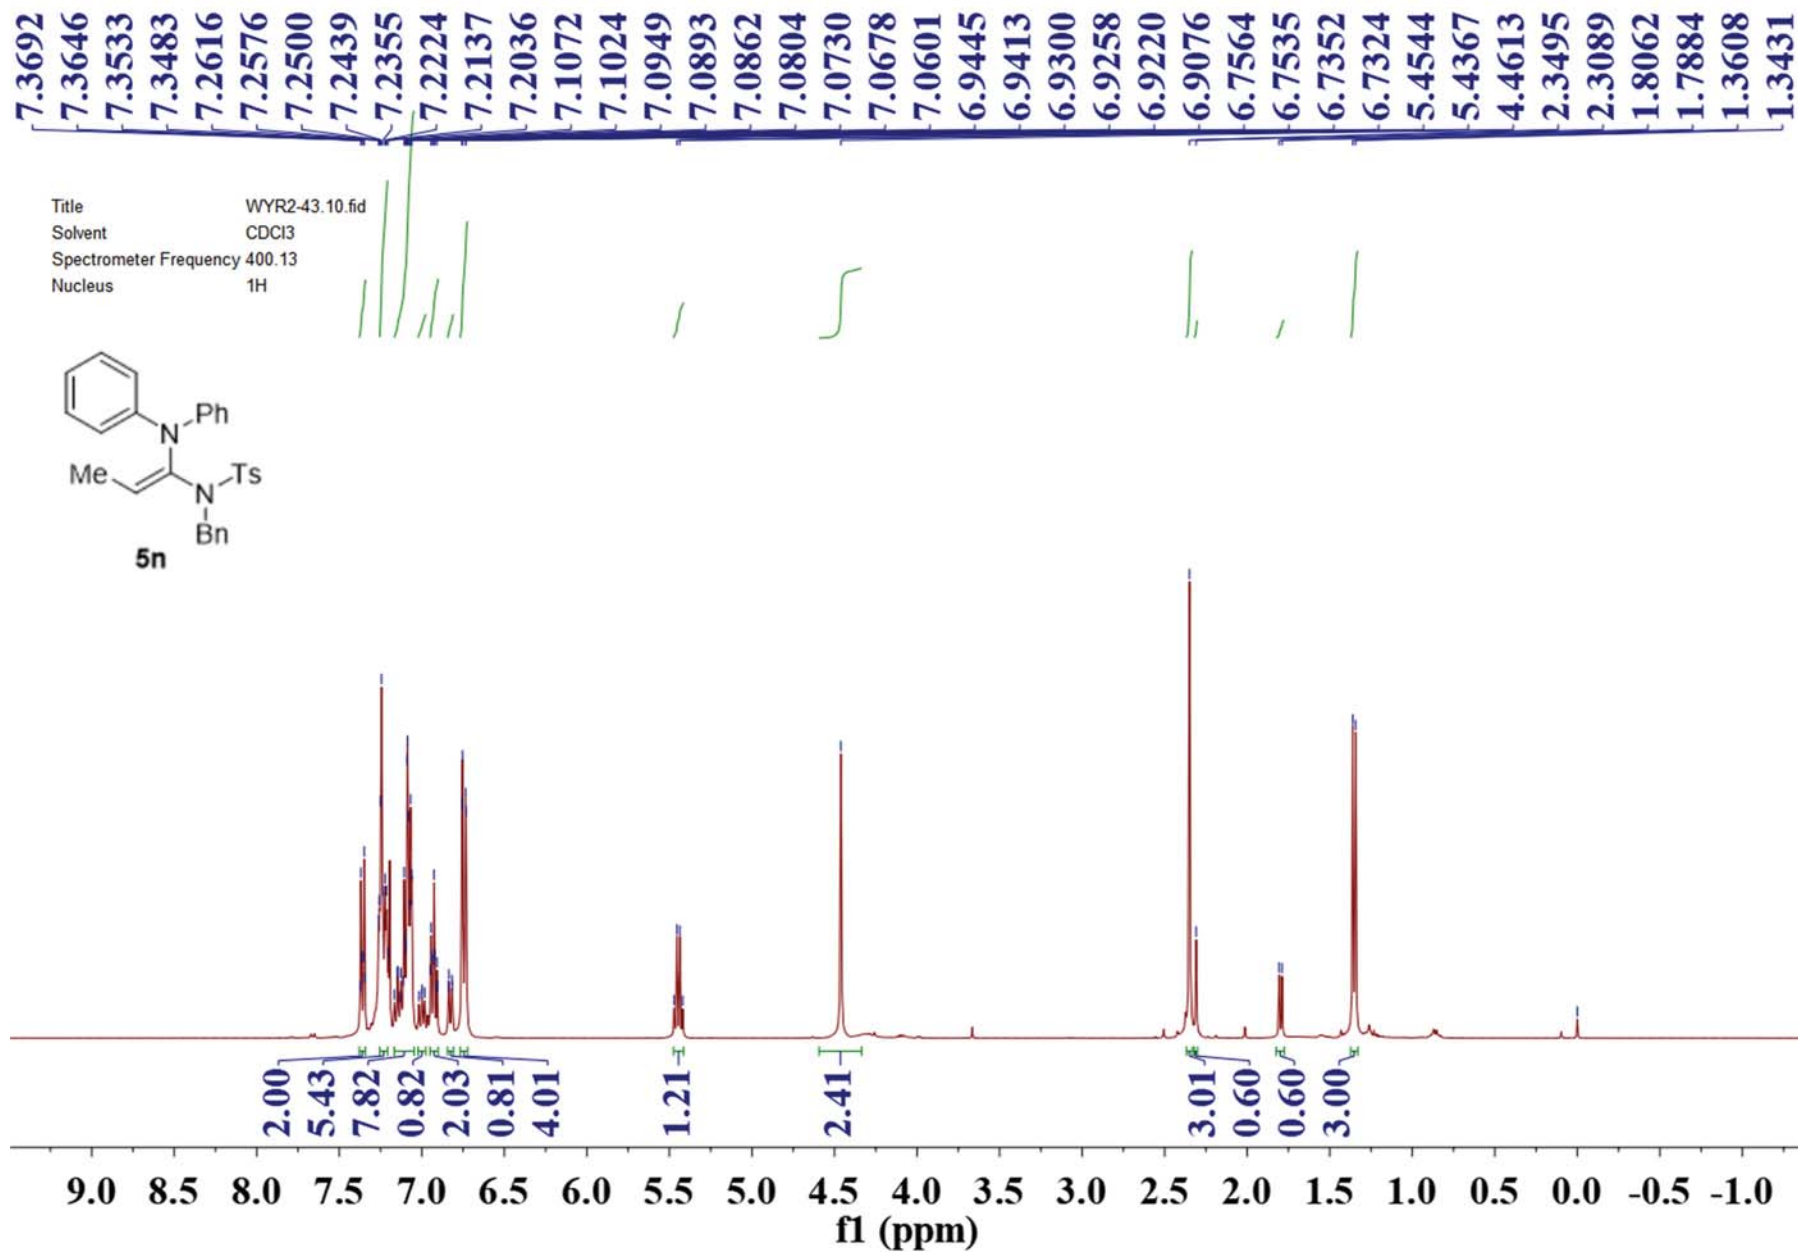

146.642  
 144.808  
 143.234  
 137.123  
 136.971  
 135.952  
 129.353  
 129.292  
 129.193  
 129.083  
 128.883  
 128.463  
 128.329  
 128.190  
 127.875  
 127.866  
 127.822  
 127.428  
 123.732  
 123.160  
 122.711  
 122.417  
 116.380  
 77.518  
 77.200  
 51.968  
 51.882  
 51.463

21.548  
 21.497  
 14.350  
 13.451

Title WYR2-43/ 10  
 Solvent CDCl3  
 Spectrometer Frequency 100.62  
 Nucleus 13C

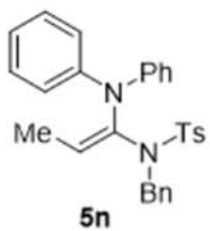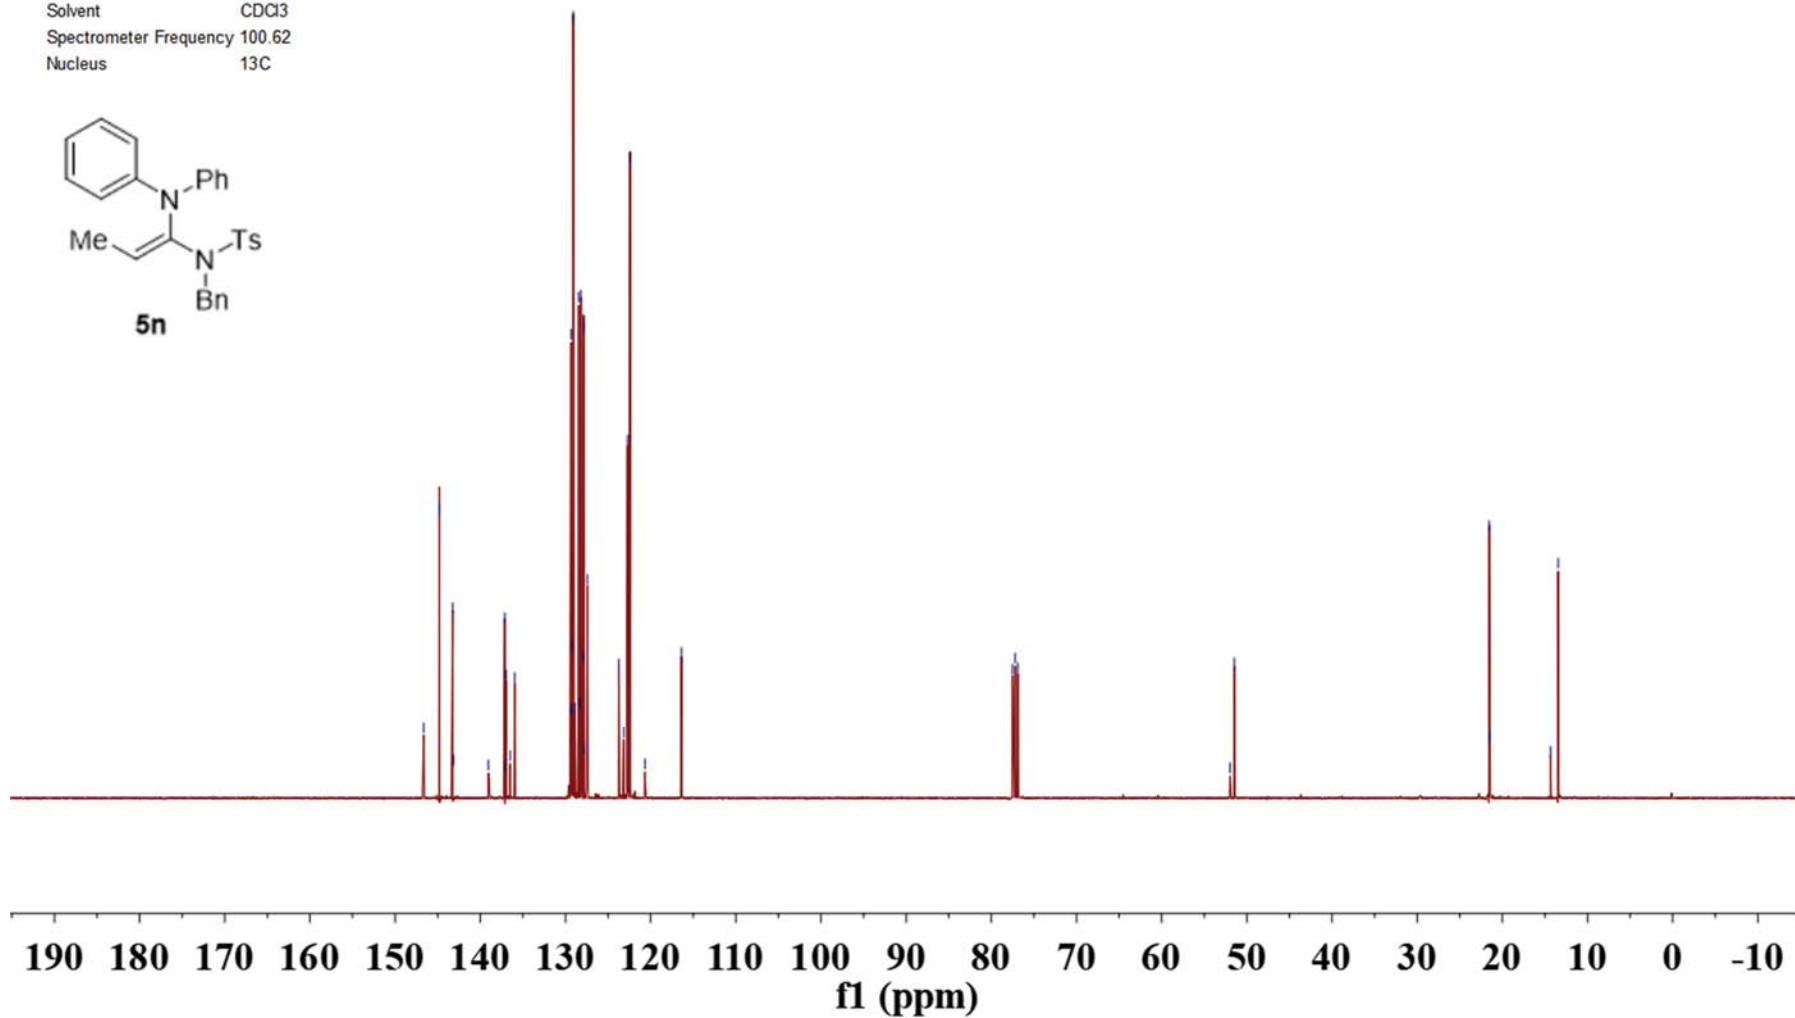

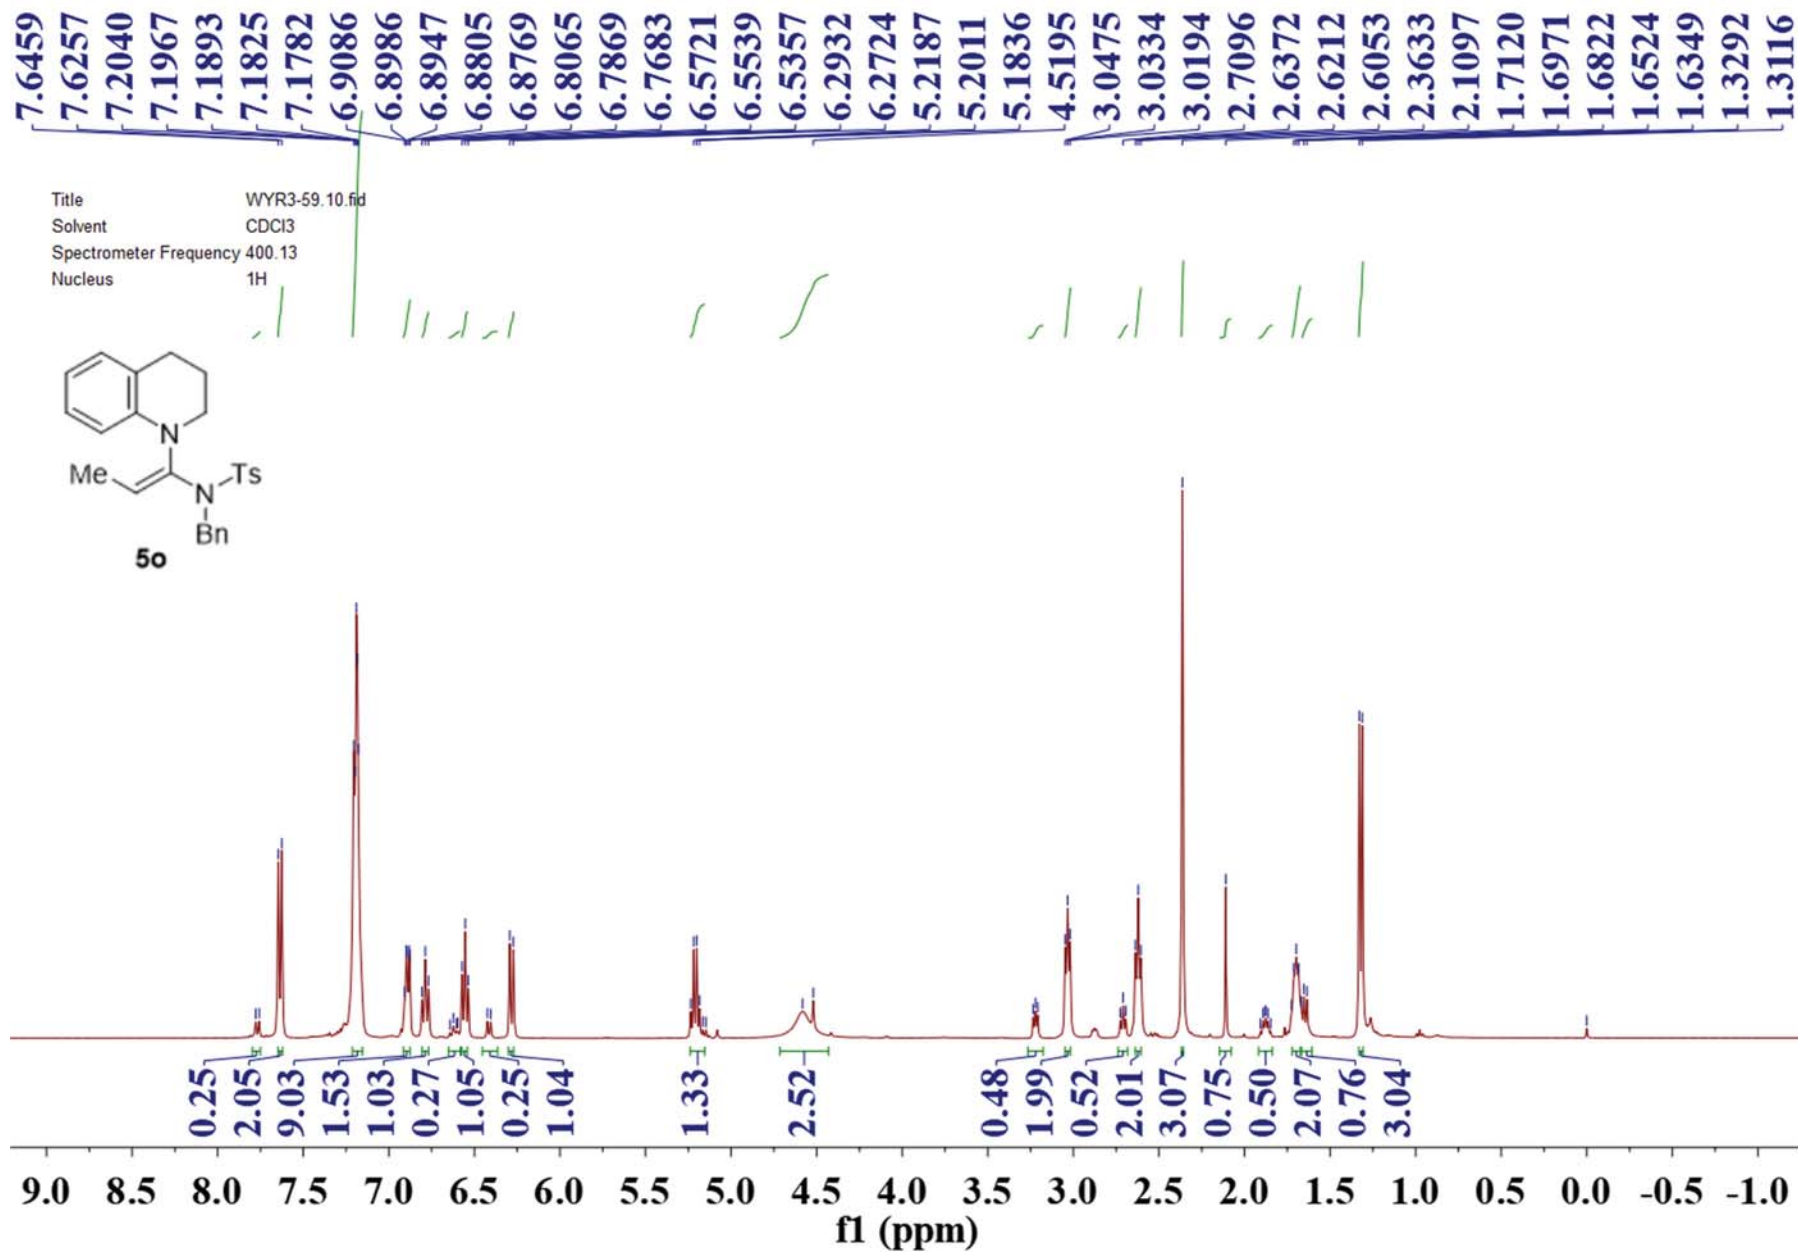

143.523  
143.369  
141.879  
138.049  
137.113  
136.816  
129.494  
129.429  
129.299  
129.261  
129.151  
128.460  
128.357  
128.286  
127.857  
127.792  
127.628  
127.391  
126.560  
126.104  
122.509  
118.897  
118.345  
117.588  
115.631  
114.425  
77.518  
77.200  
76.882  
51.555  
51.292  
46.751  
46.167  
27.851  
27.764  
21.733  
21.565  
21.070  
14.146  
13.480

Title WYR3-59.10.fid  
Solvent CDCl3  
Spectrometer Frequency 100.62  
Nucleus 13C

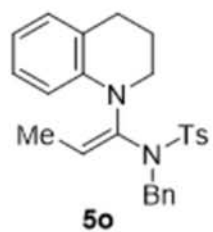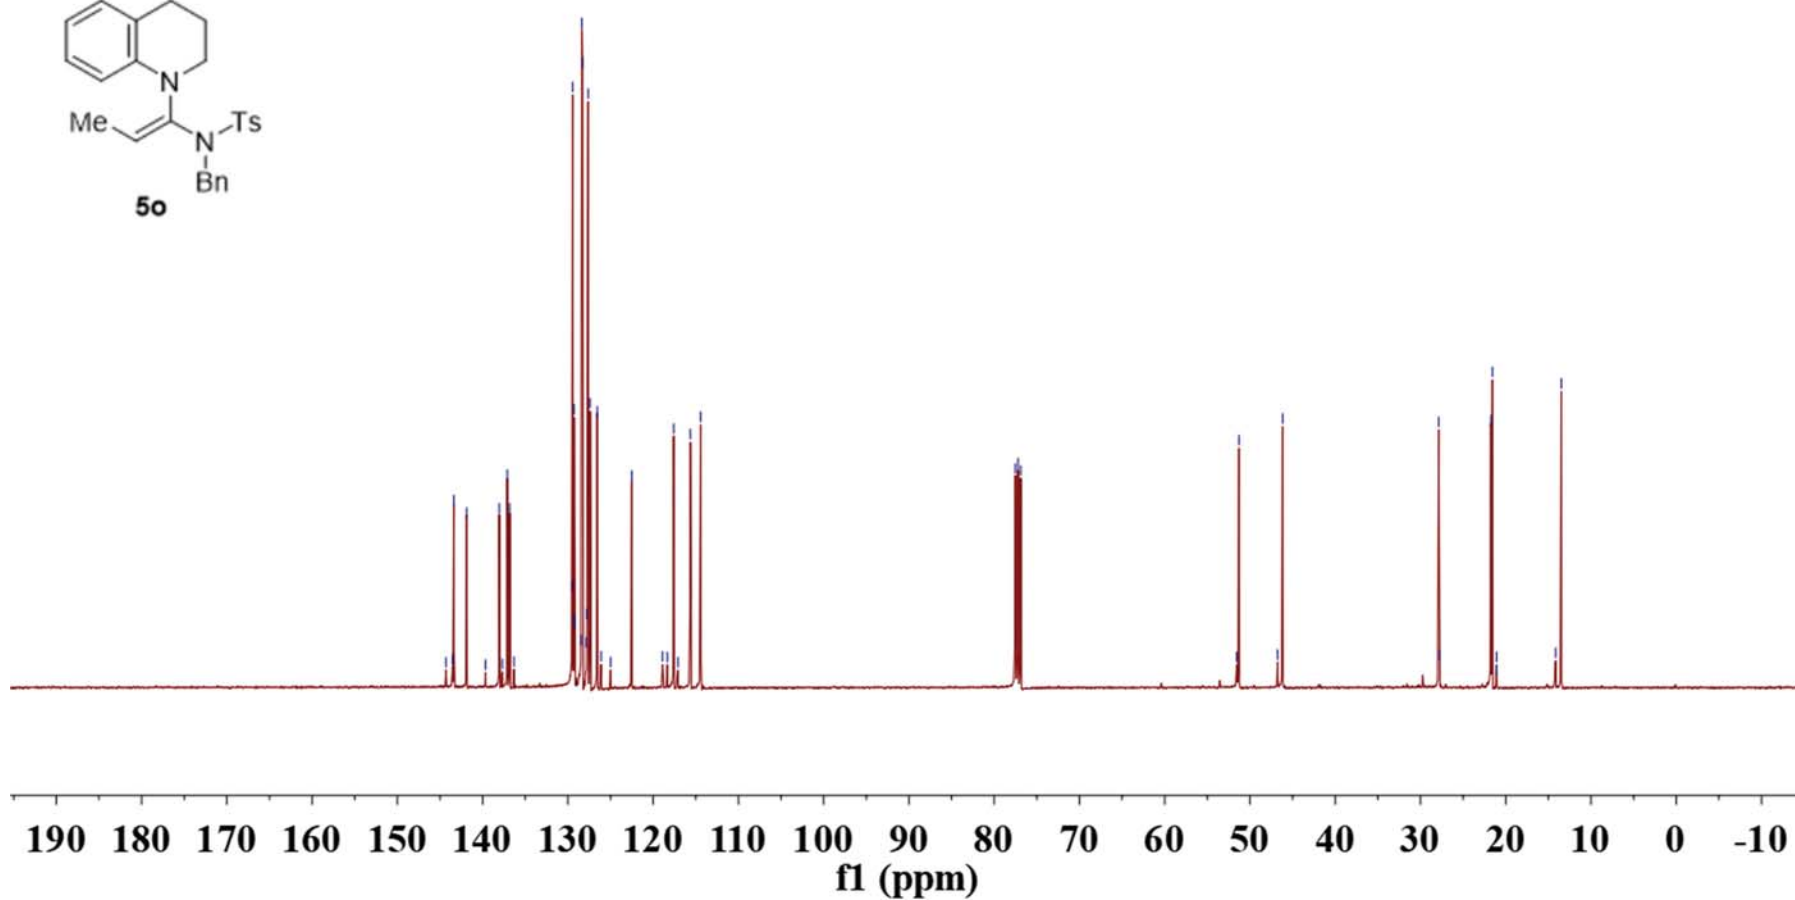

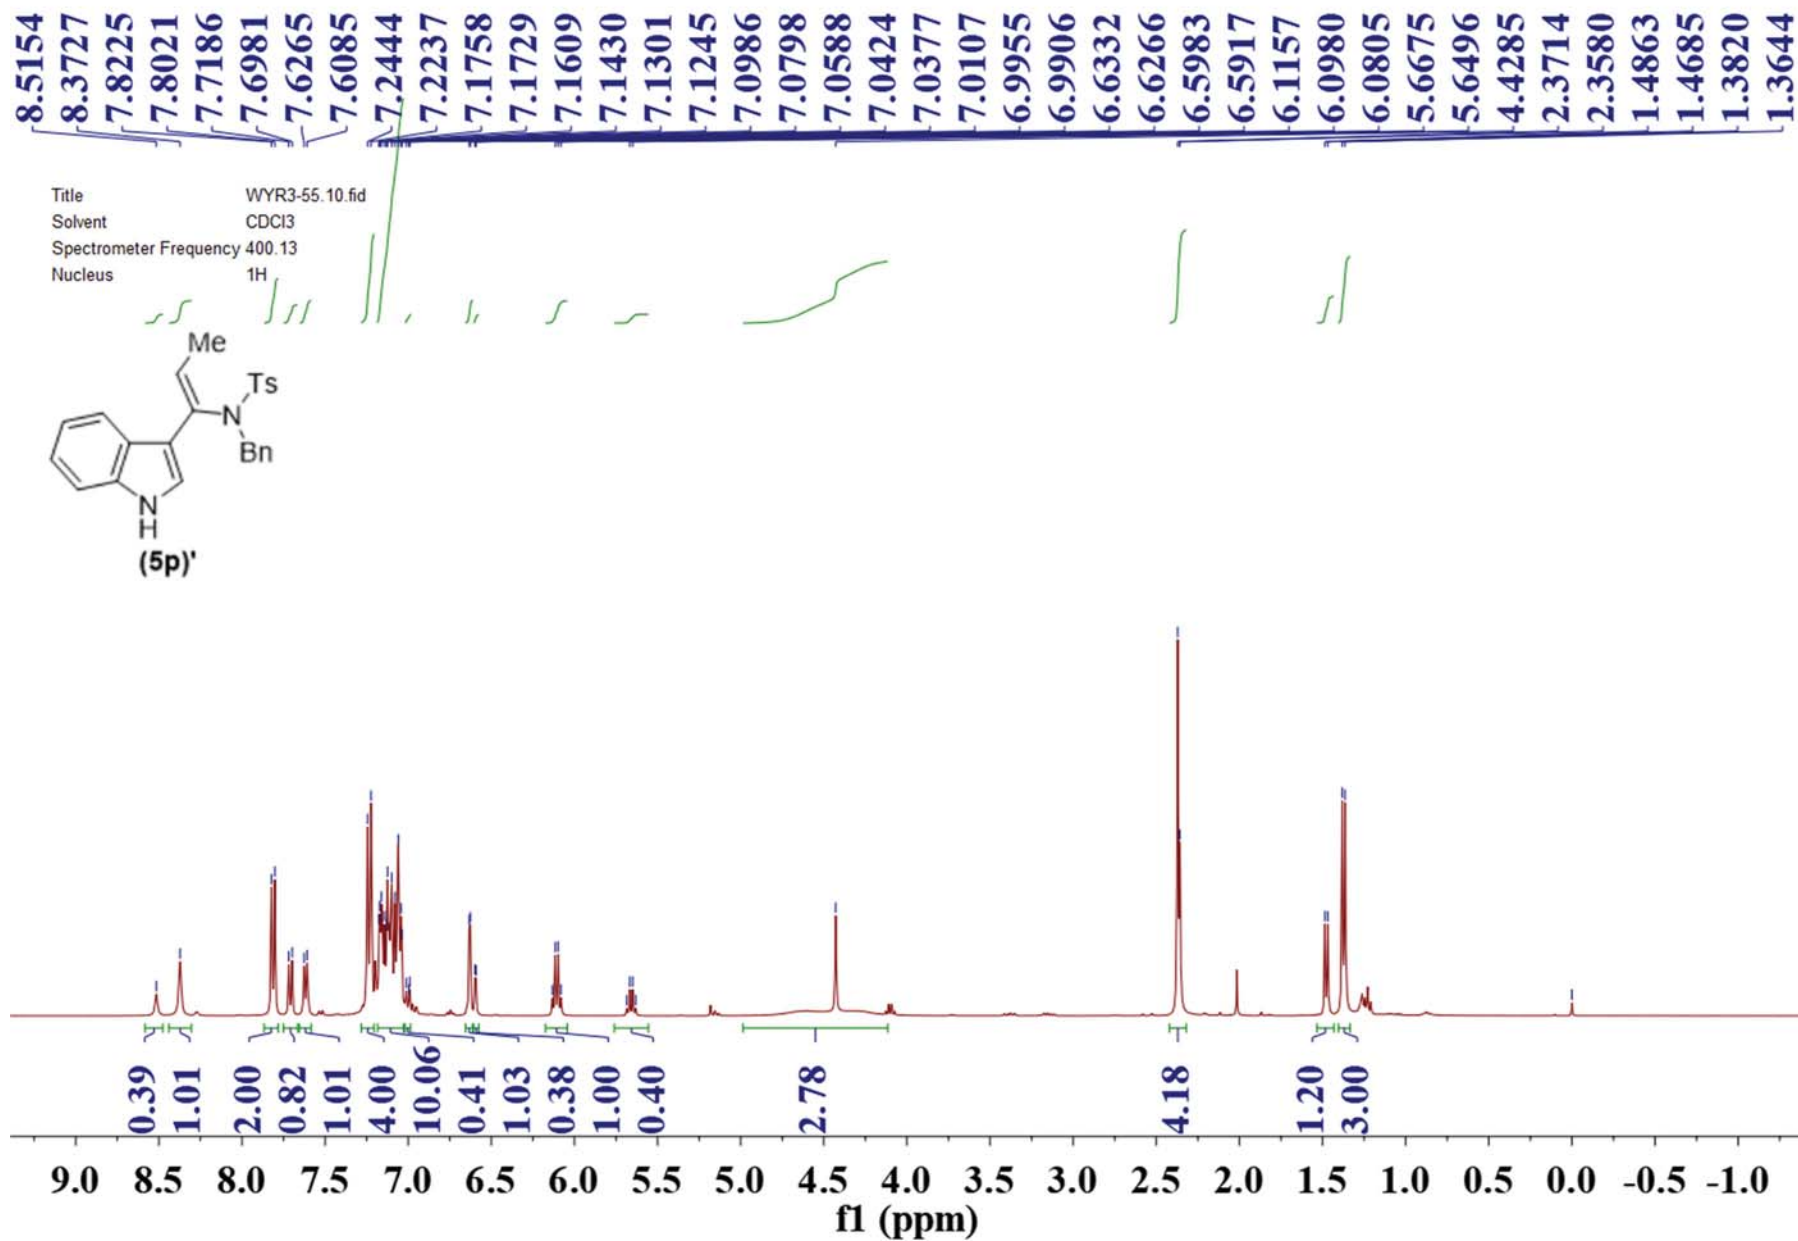

143.540  
138.302  
138.254  
137.091  
136.694  
136.209  
130.851  
129.855  
129.732  
129.604  
128.980  
128.368  
128.257  
128.185  
127.865  
127.847  
127.749  
127.716  
127.452  
125.925  
124.848  
123.993  
122.306  
122.029  
120.349  
120.240  
119.952  
119.877  
114.229  
111.604  
111.414  
77.518  
77.200  
76.882  
52.473  
52.136  
21.697  
21.666  
15.111  
14.519

Title WYR3-55.10.fid  
Solvent CDCl3  
Spectrometer Frequency 100.62  
Nucleus 13C

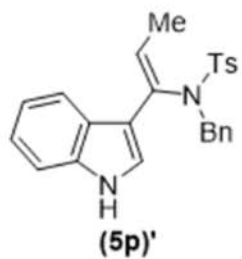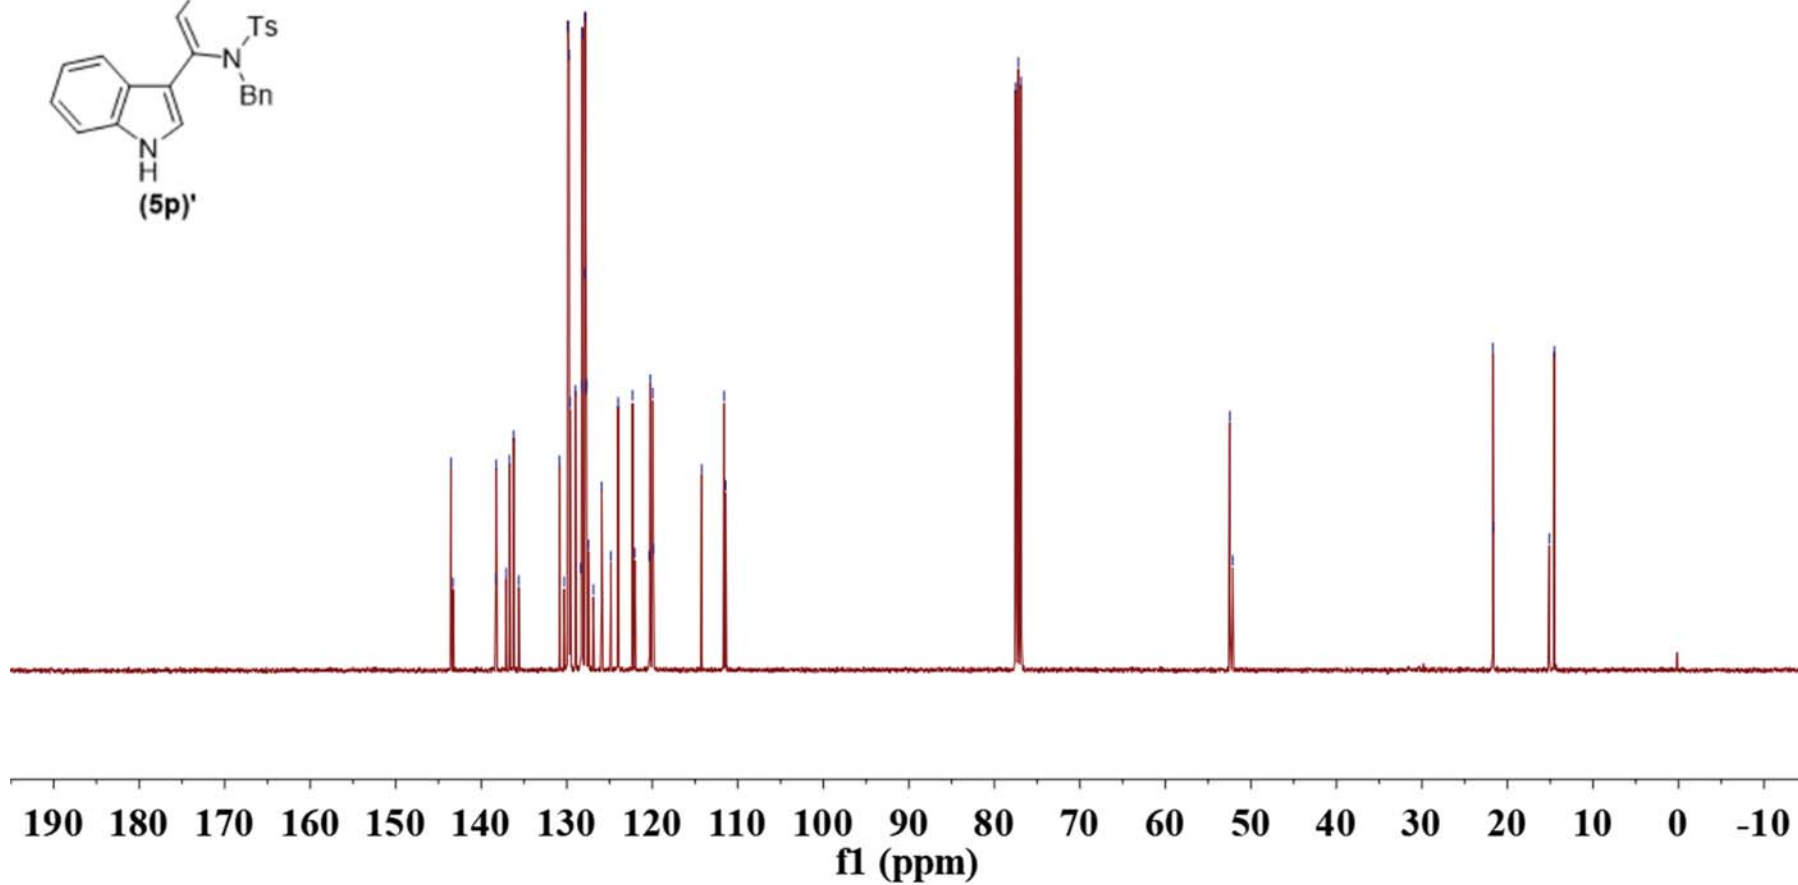

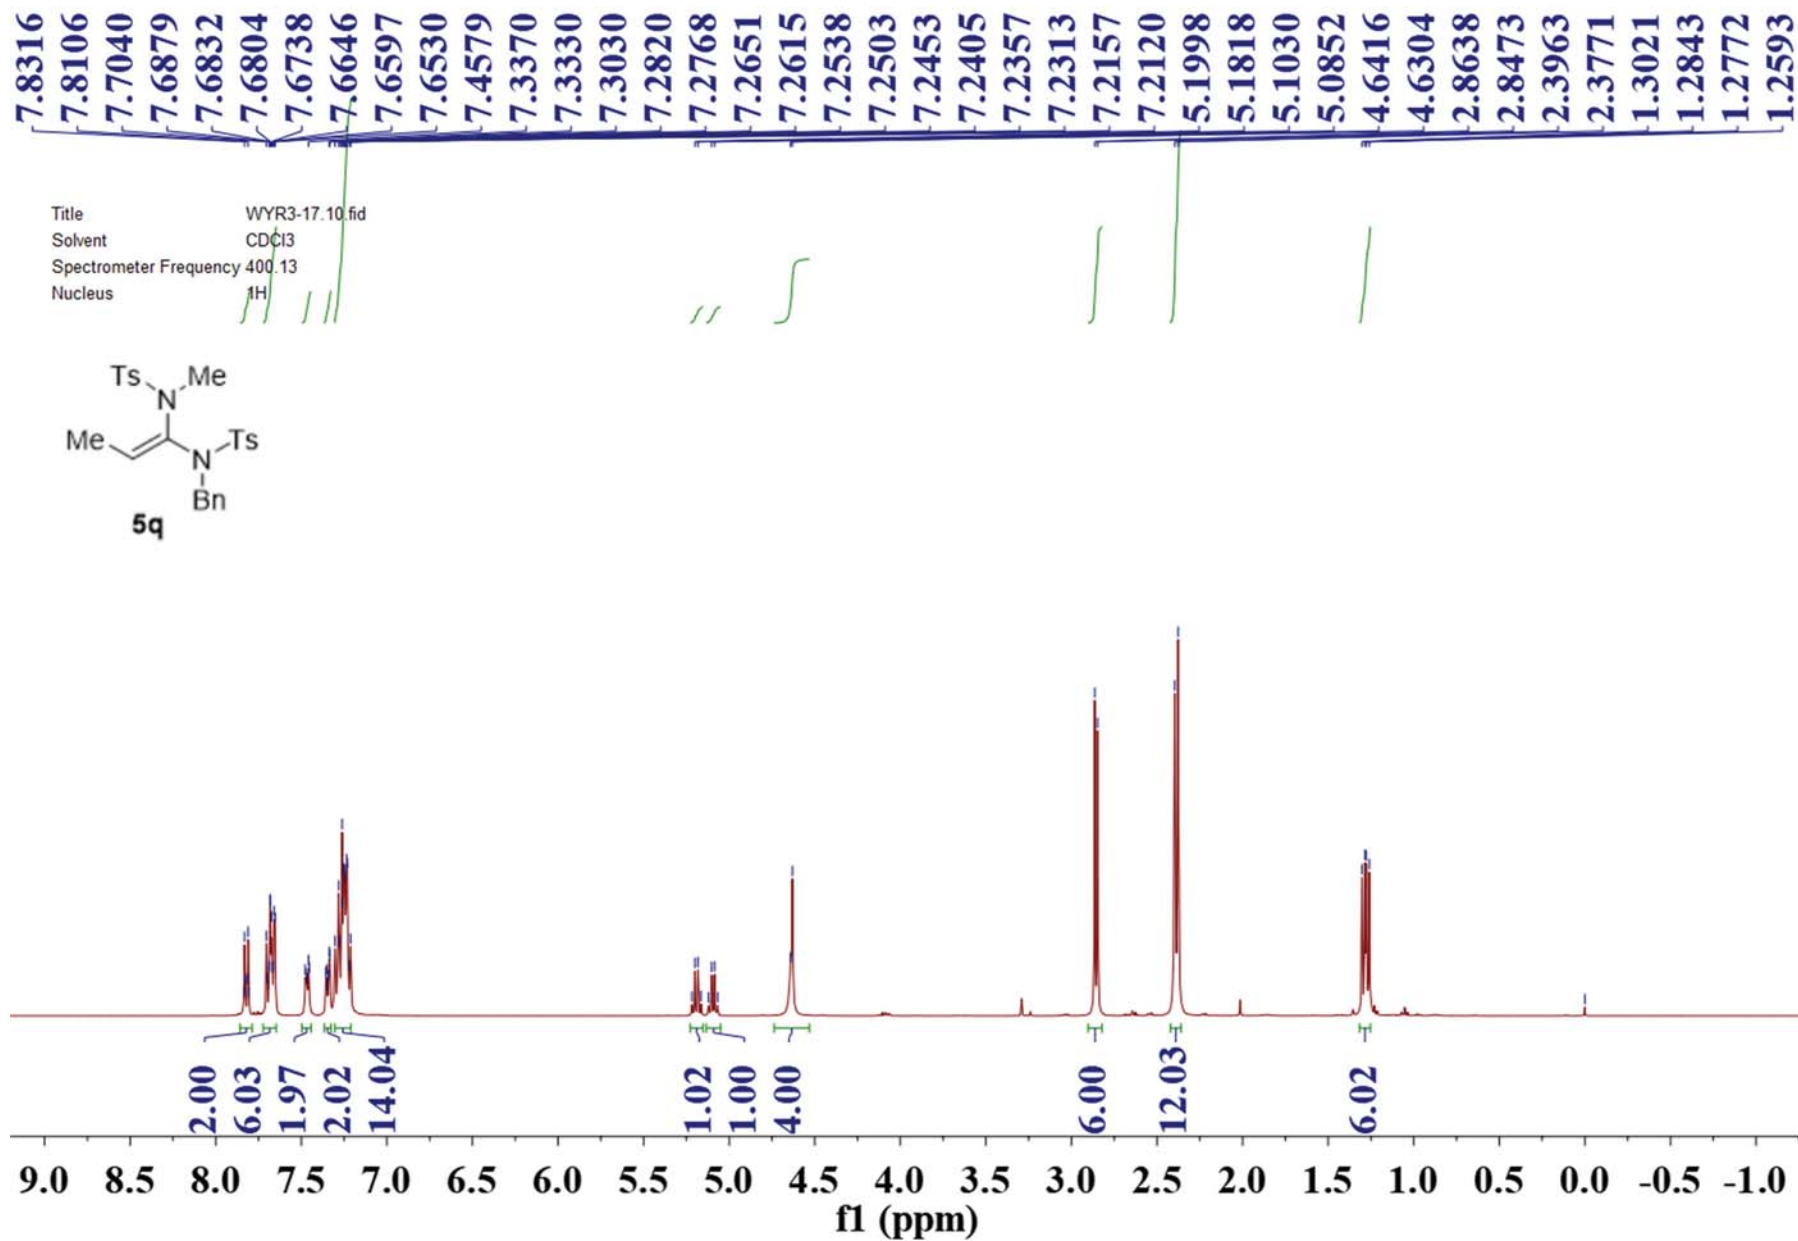



143.901  
 143.767  
 143.556  
 143.485  
 136.957  
 136.557  
 135.991  
 134.256  
 133.822  
 129.751  
 129.652  
 129.633  
 129.506  
 129.492  
 129.339  
 129.044  
 128.241  
 128.121  
 128.114  
 127.824  
 127.783  
 127.611  
 127.499  
 77.519  
 77.200  
 56.881  
 52.453  
 51.362  
 39.449  
 36.683  
 21.512  
 21.492  
 13.964  
 13.290

Title WYR3-17/ 10  
 Solvent CDCl3  
 Spectrometer Frequency 100.62  
 Nucleus 13C

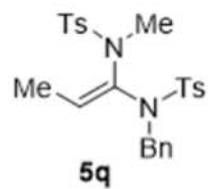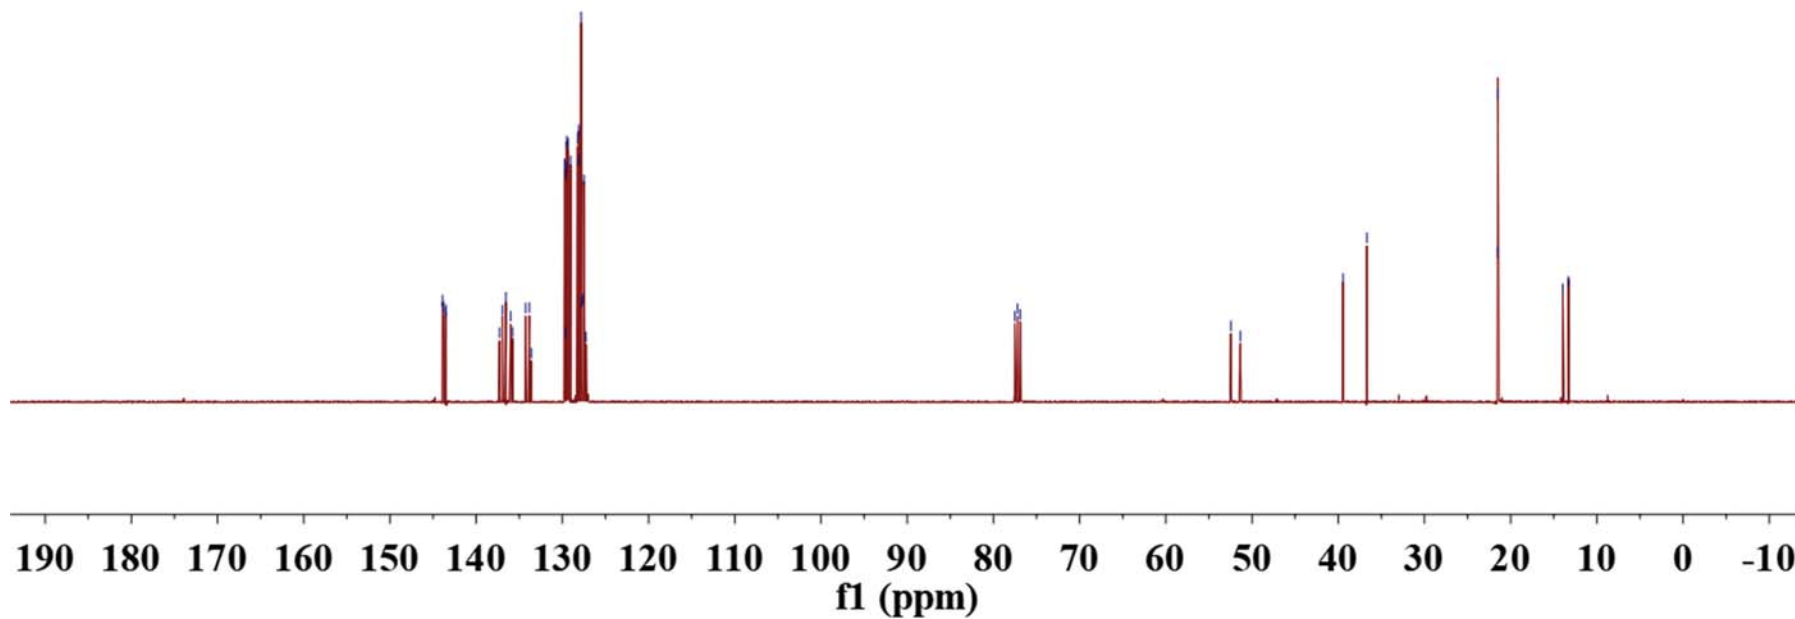

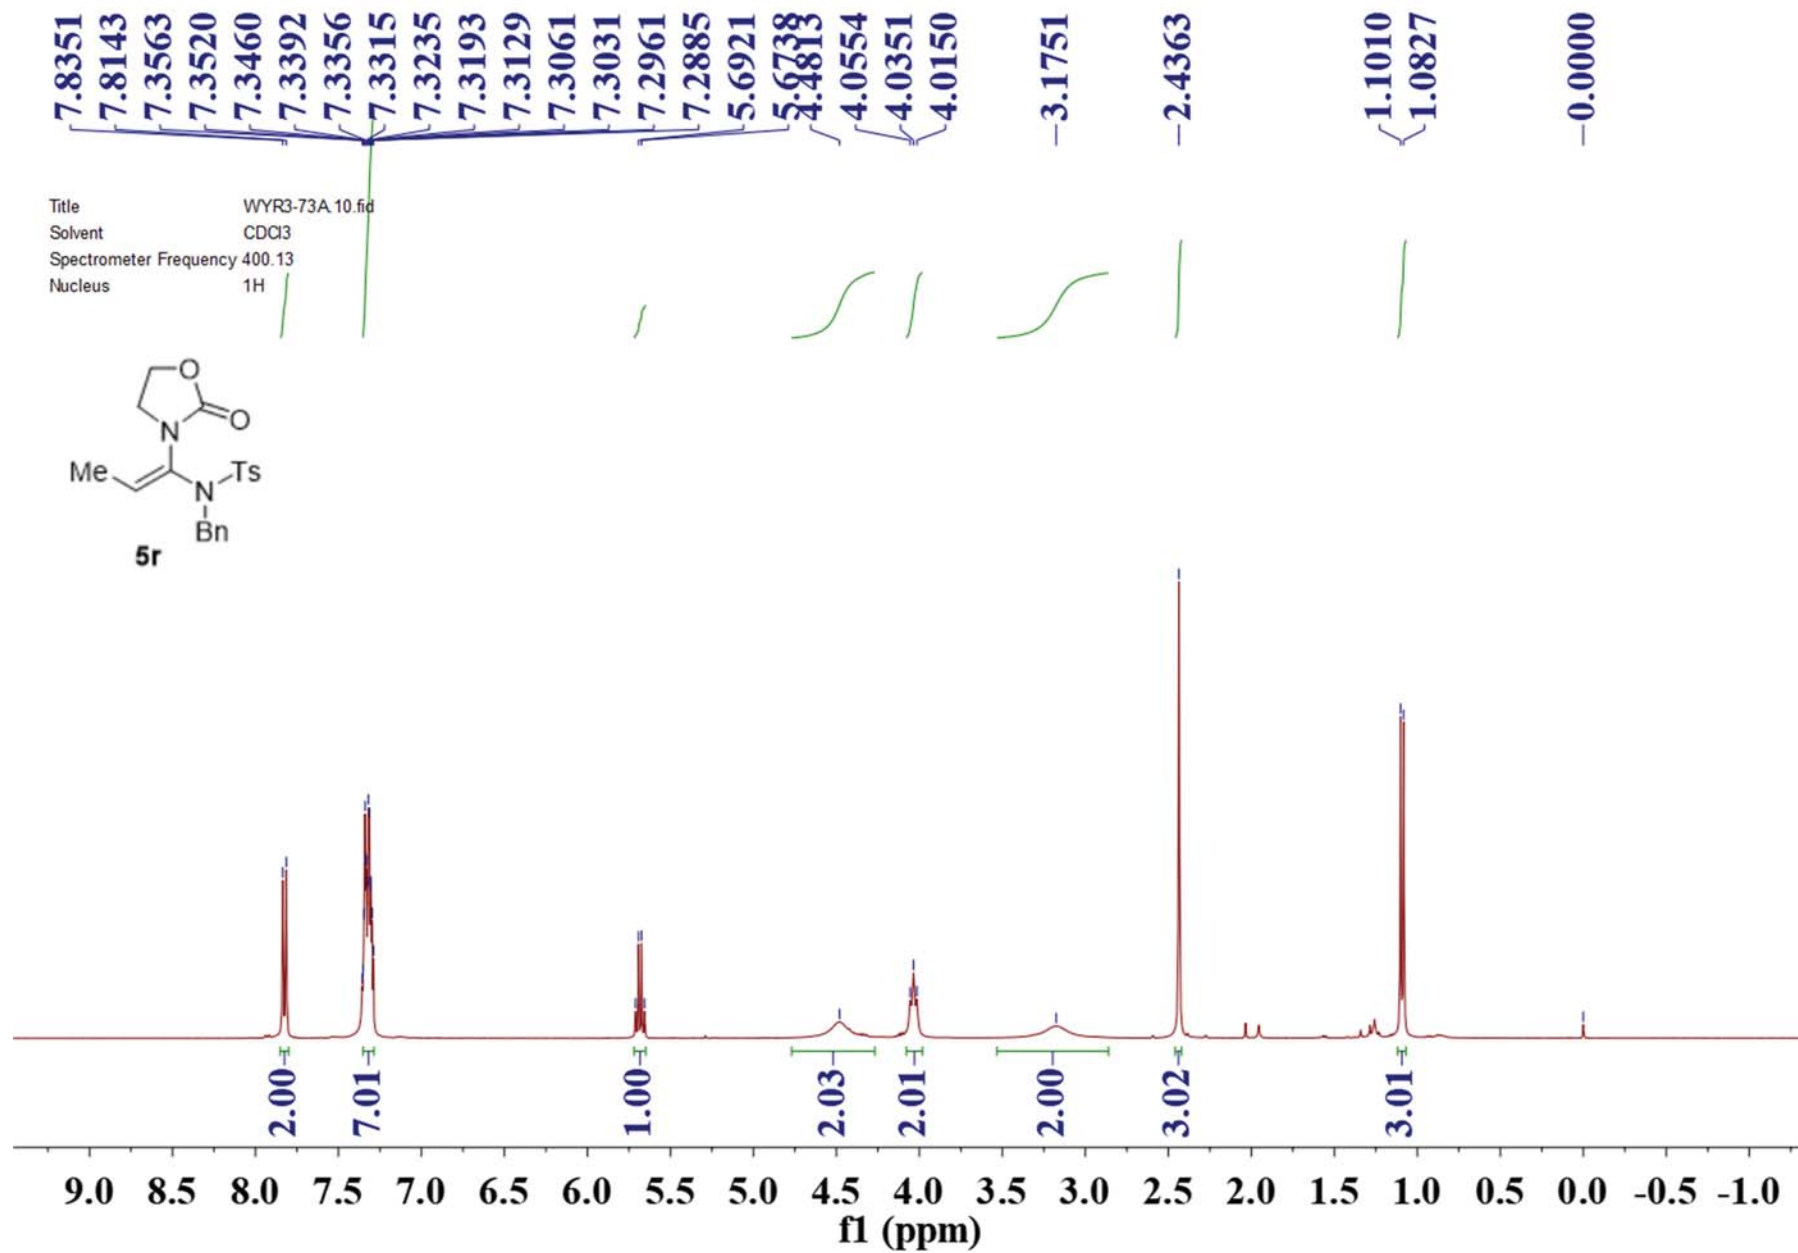

156.900  
 144.096  
 136.754  
 135.657  
 129.872  
 129.760  
 129.112  
 128.563  
 128.432  
 127.547  
 123.004  
  
 77.519  
 77.200  
 76.881  
  
 61.598  
 53.325  
 44.105  
  
 21.639  
 12.574

Title WYR3-73A.11.fid  
 Solvent CDCl3  
 Spectrometer Frequency 100.62  
 Nucleus 13C

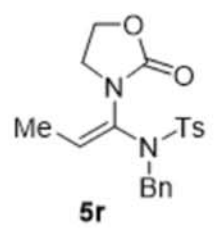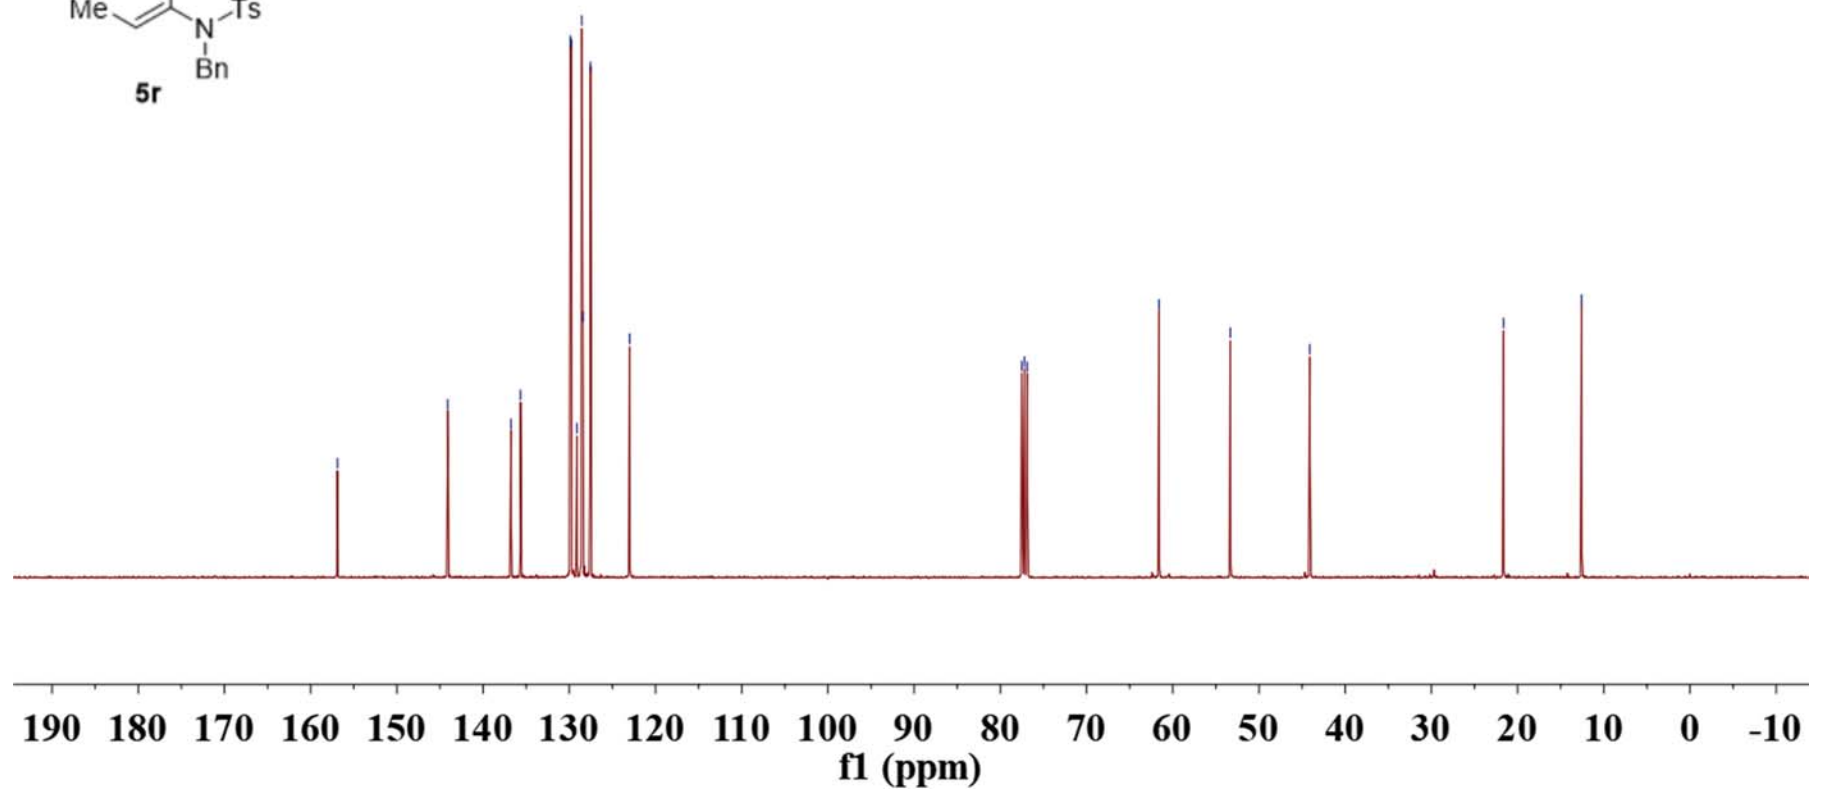

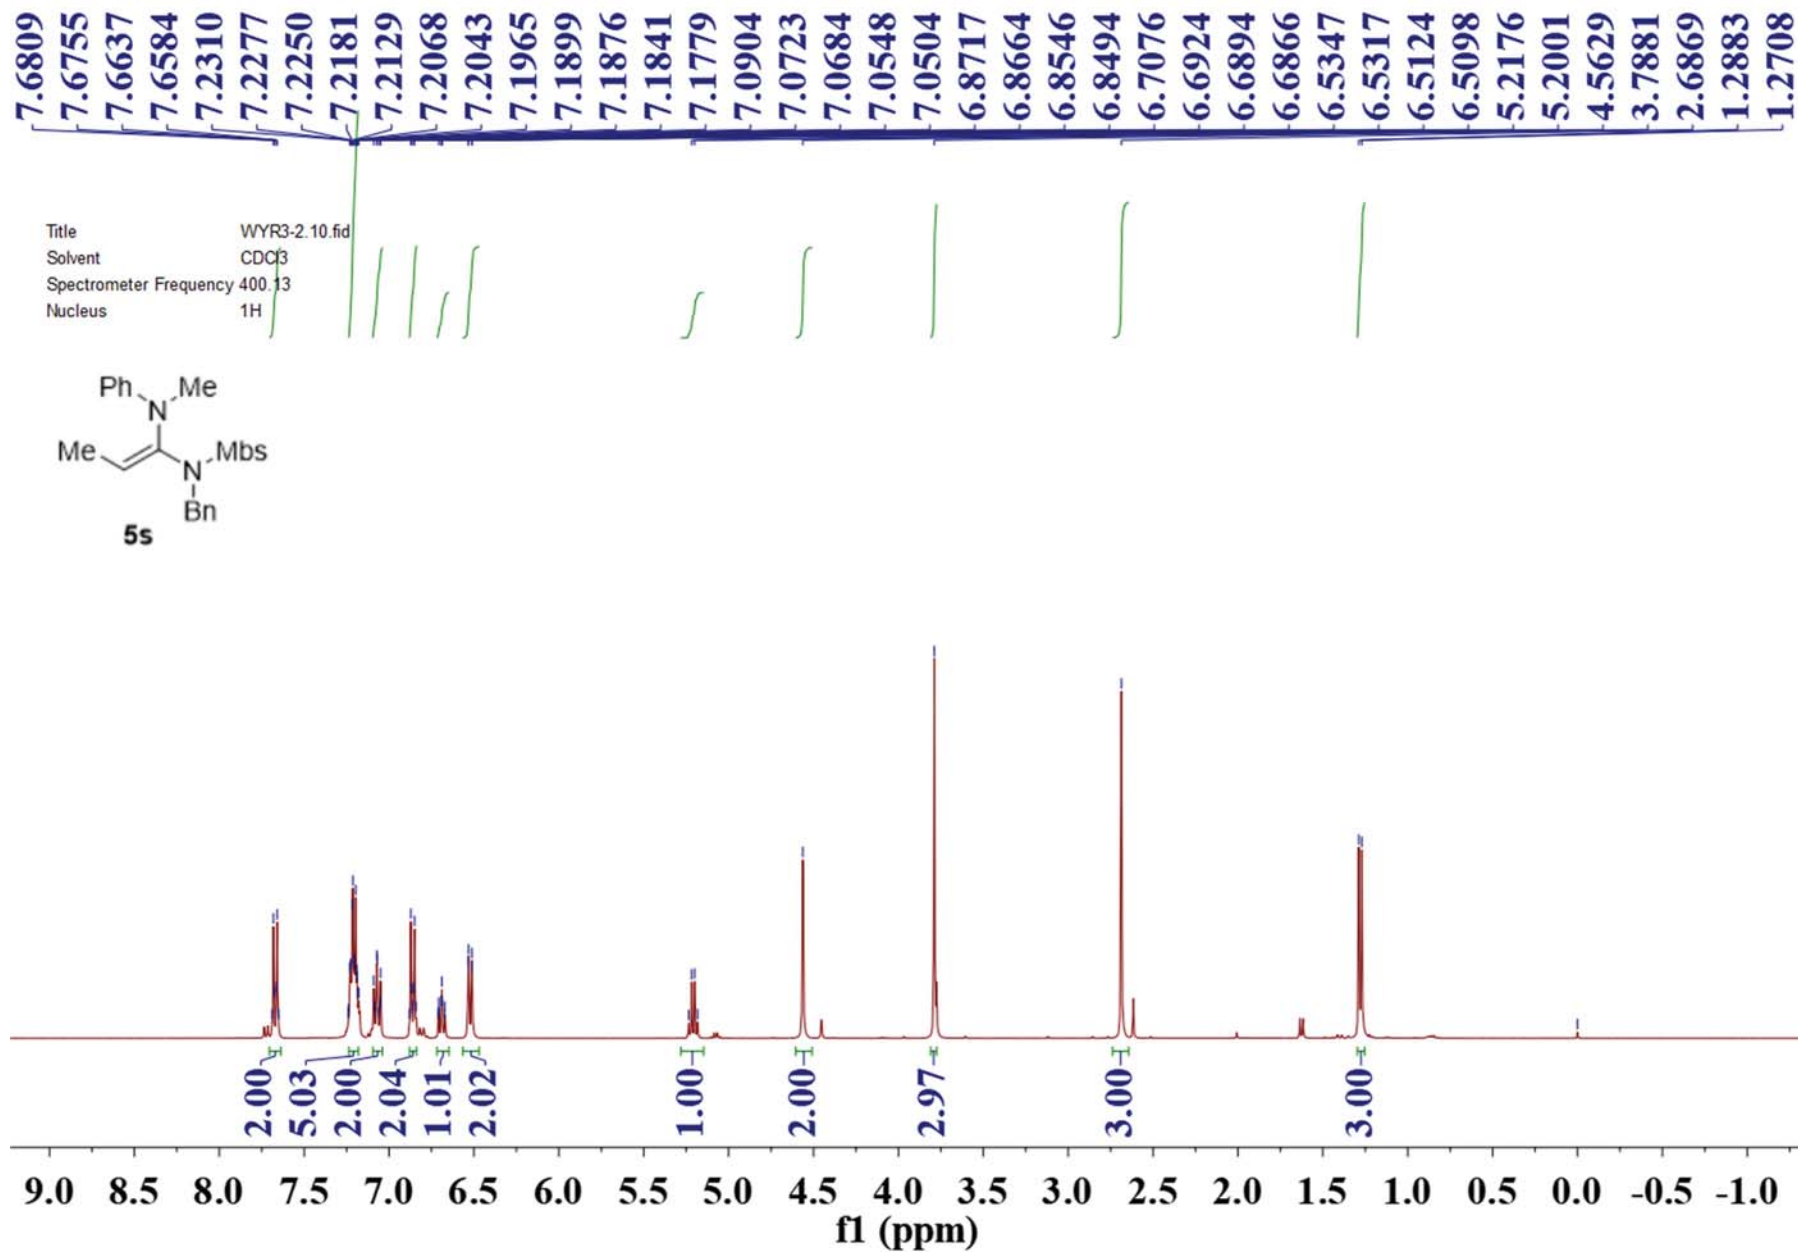

162.789  
 146.276  
 137.586  
 137.098  
 132.319  
 129.630  
 128.766  
 128.302  
 128.229  
 127.390  
 118.227  
 114.676  
 114.045  
 113.903  
 77.519  
 77.200  
 76.881  
 ~55.601  
 ~51.572  
 -34.917  
 -13.204

Title WYR3-2.10.fid  
 Solvent CDCl3  
 Spectrometer Frequency 100.62  
 Nucleus 13C

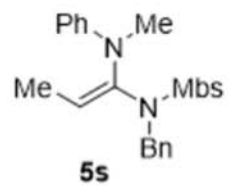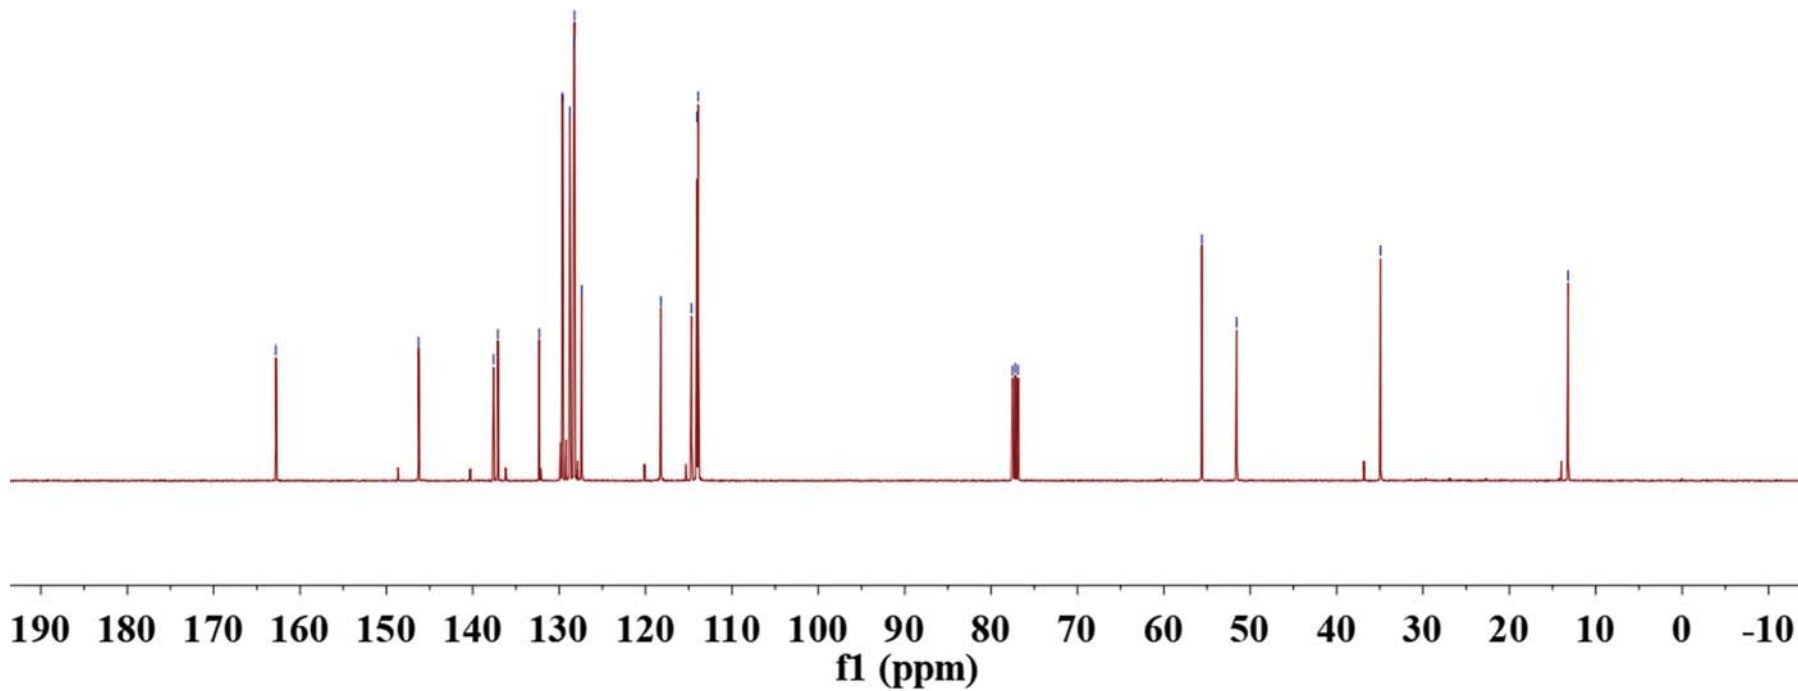

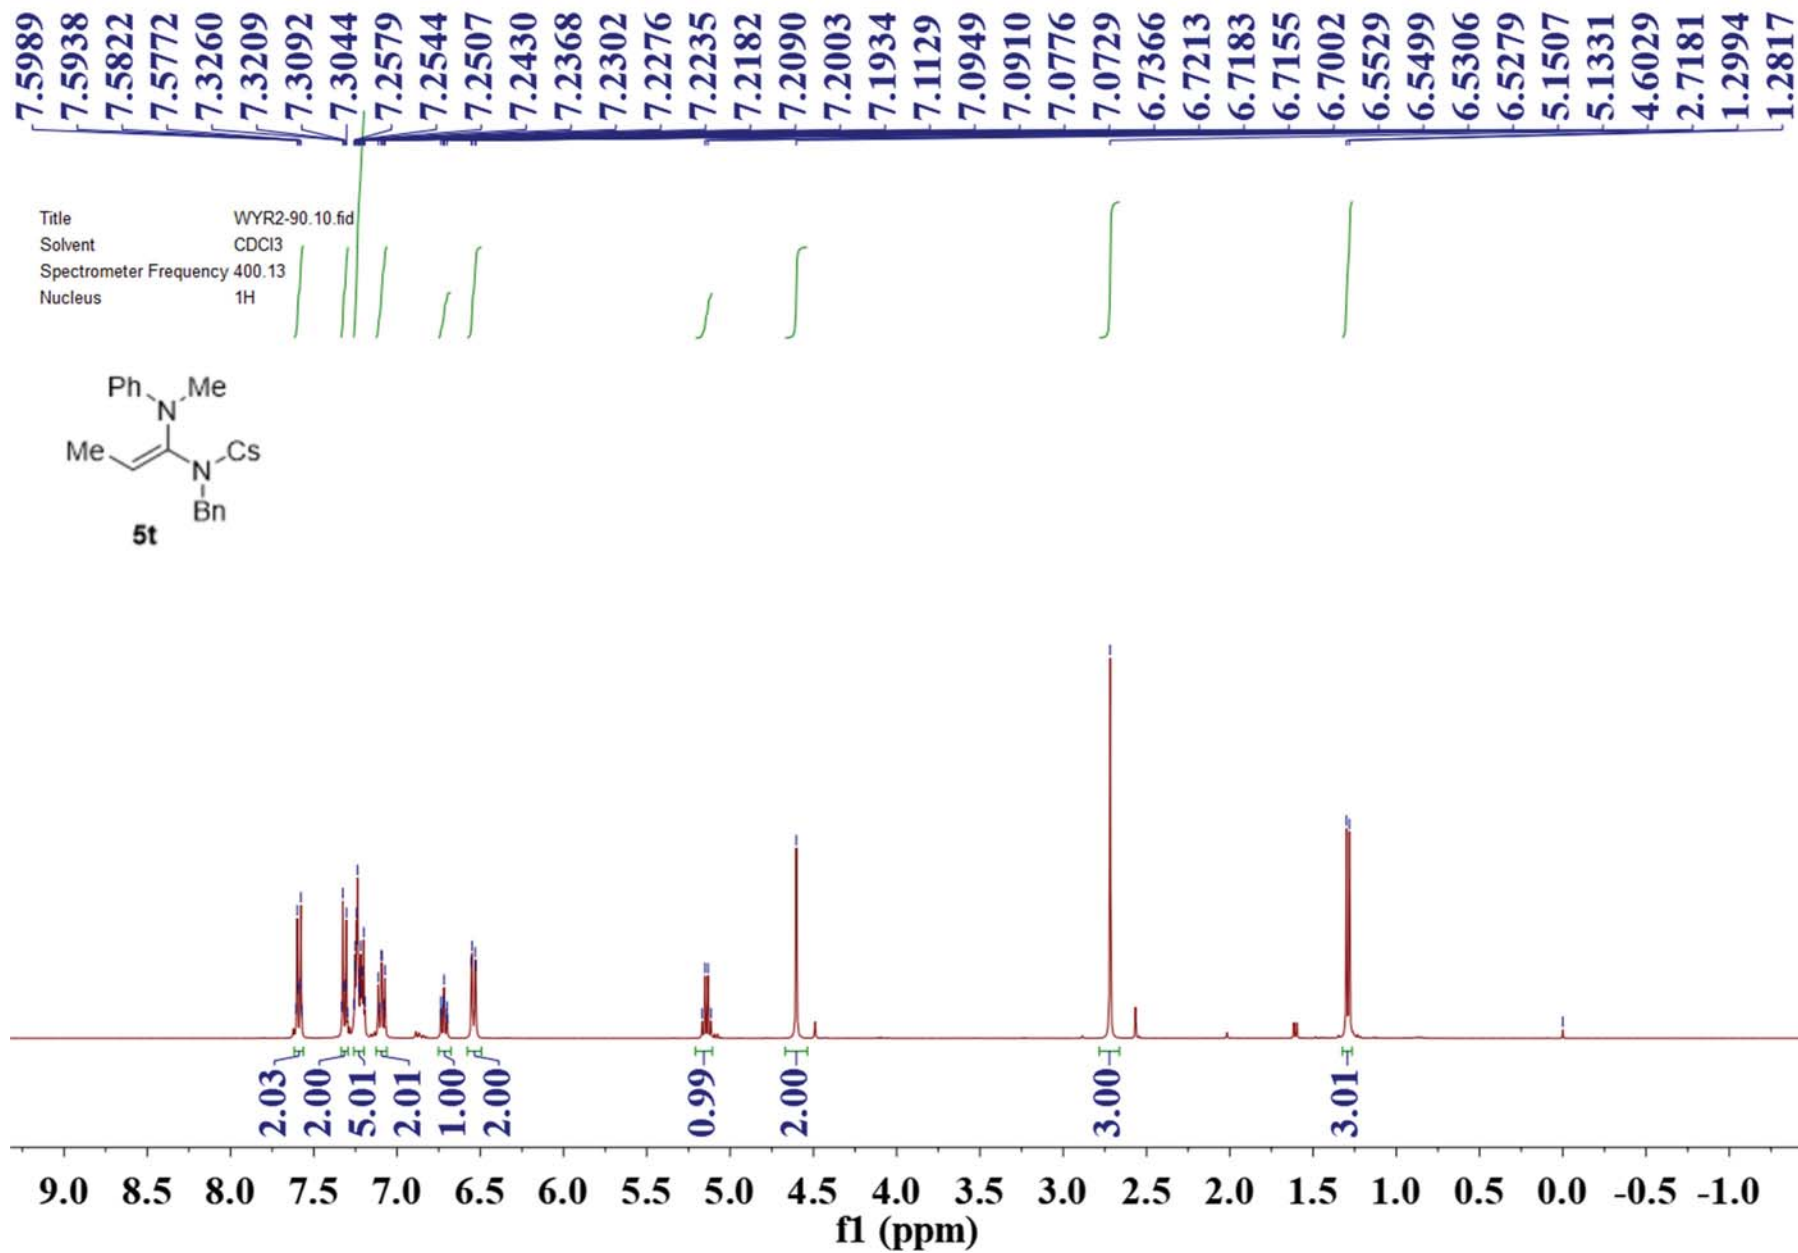

146.140  
139.375  
138.912  
137.896  
136.788  
129.000  
128.910  
128.846  
128.477  
128.323  
127.660  
118.576  
114.898  
114.109  
  
77.518  
77.200  
76.882  
  
-52.213  
  
-35.240  
  
-13.208

Title WYR2-90.10.fid  
Solvent CDCl3  
Spectrometer Frequency 100.62  
Nucleus 13C

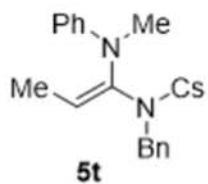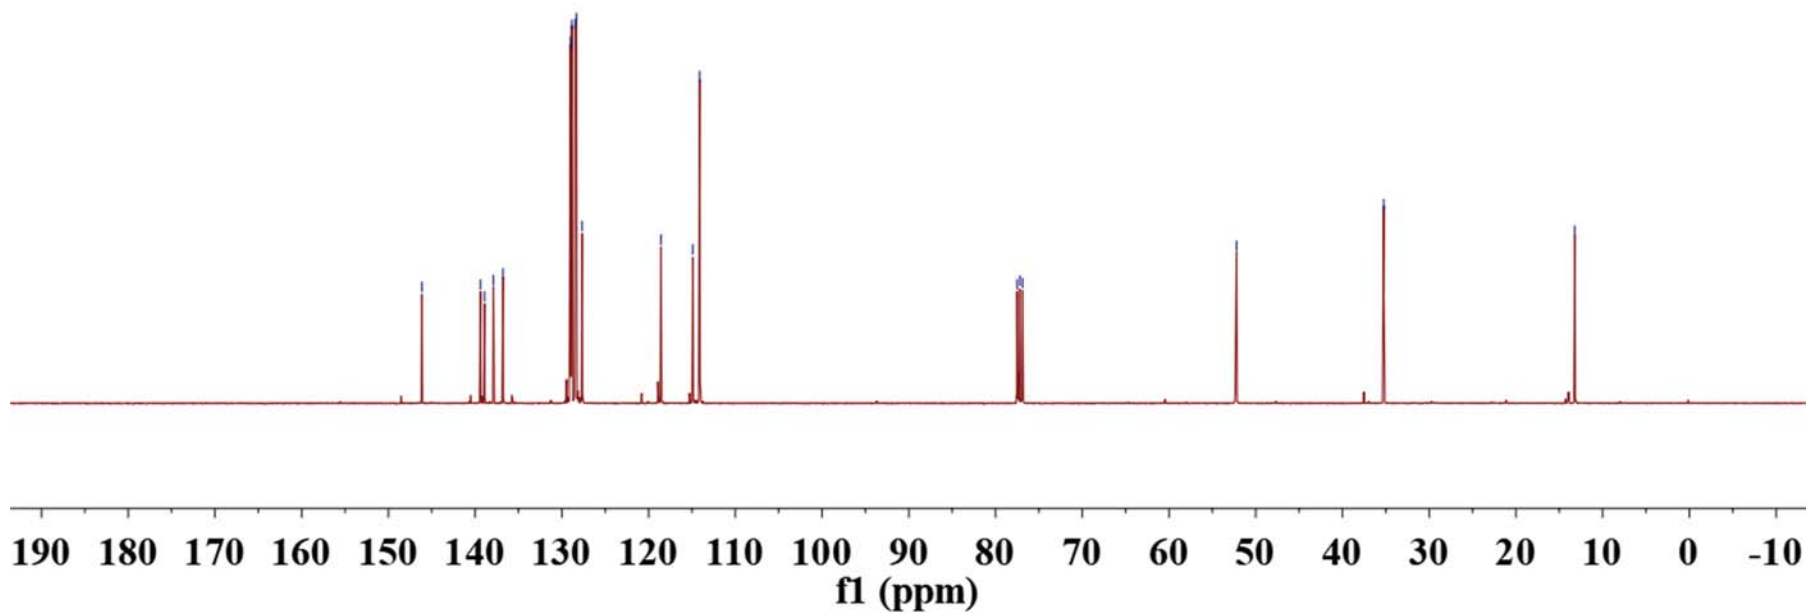

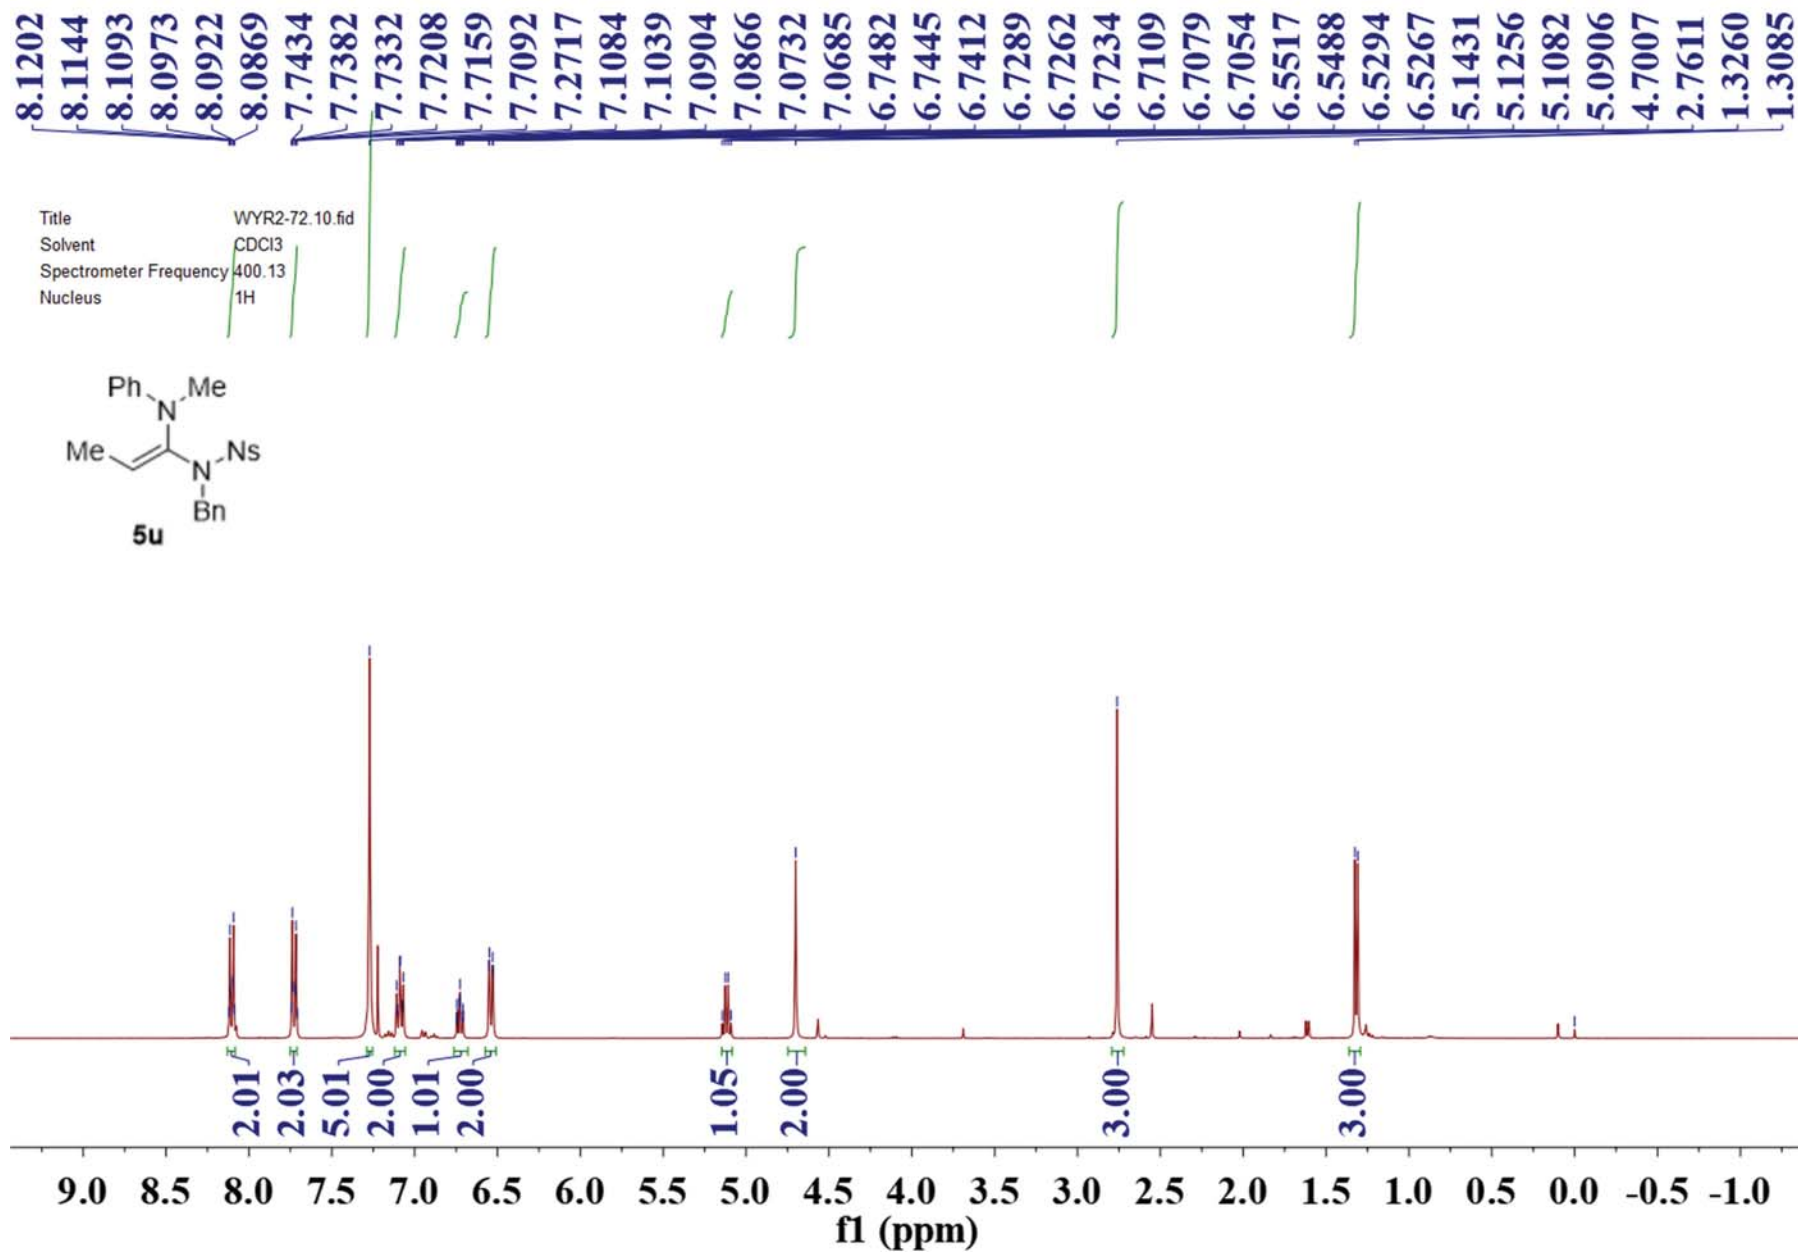



149.764  
 146.605  
 146.019  
 138.538  
 136.569  
 129.112  
 128.753  
 128.455  
 128.422  
 128.059  
 123.949  
 119.067  
 115.073  
 114.132

77.518  
 77.200  
 76.882

-53.159

-35.905

-13.185

Title WYR2-72.10.fid  
 Solvent CDCl3  
 Spectrometer Frequency 100.62  
 Nucleus 13C

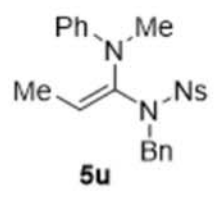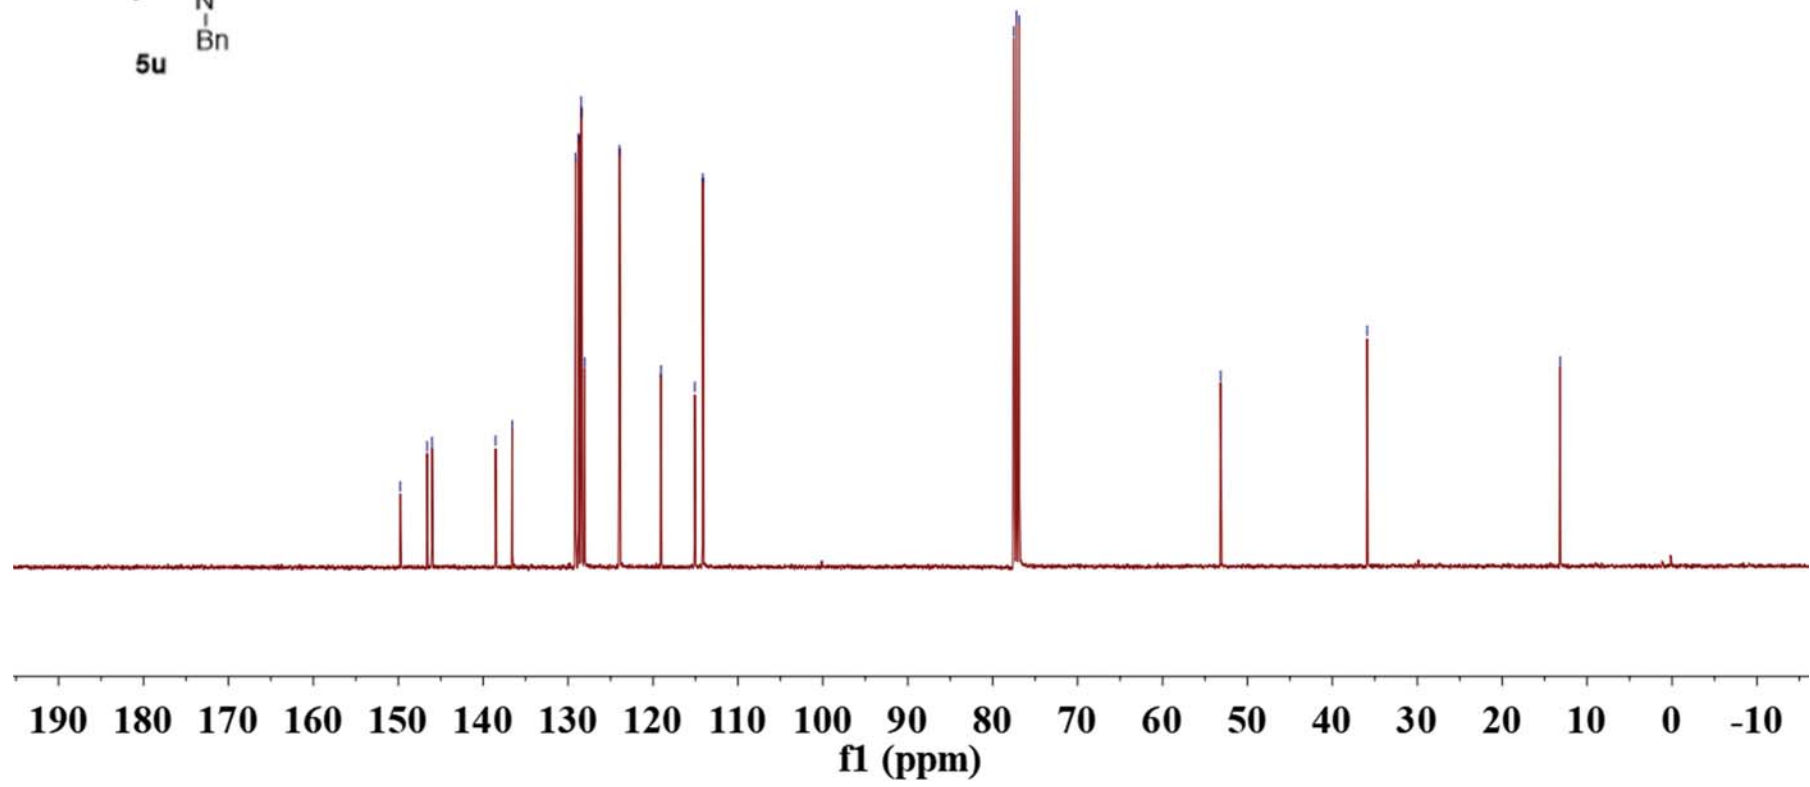

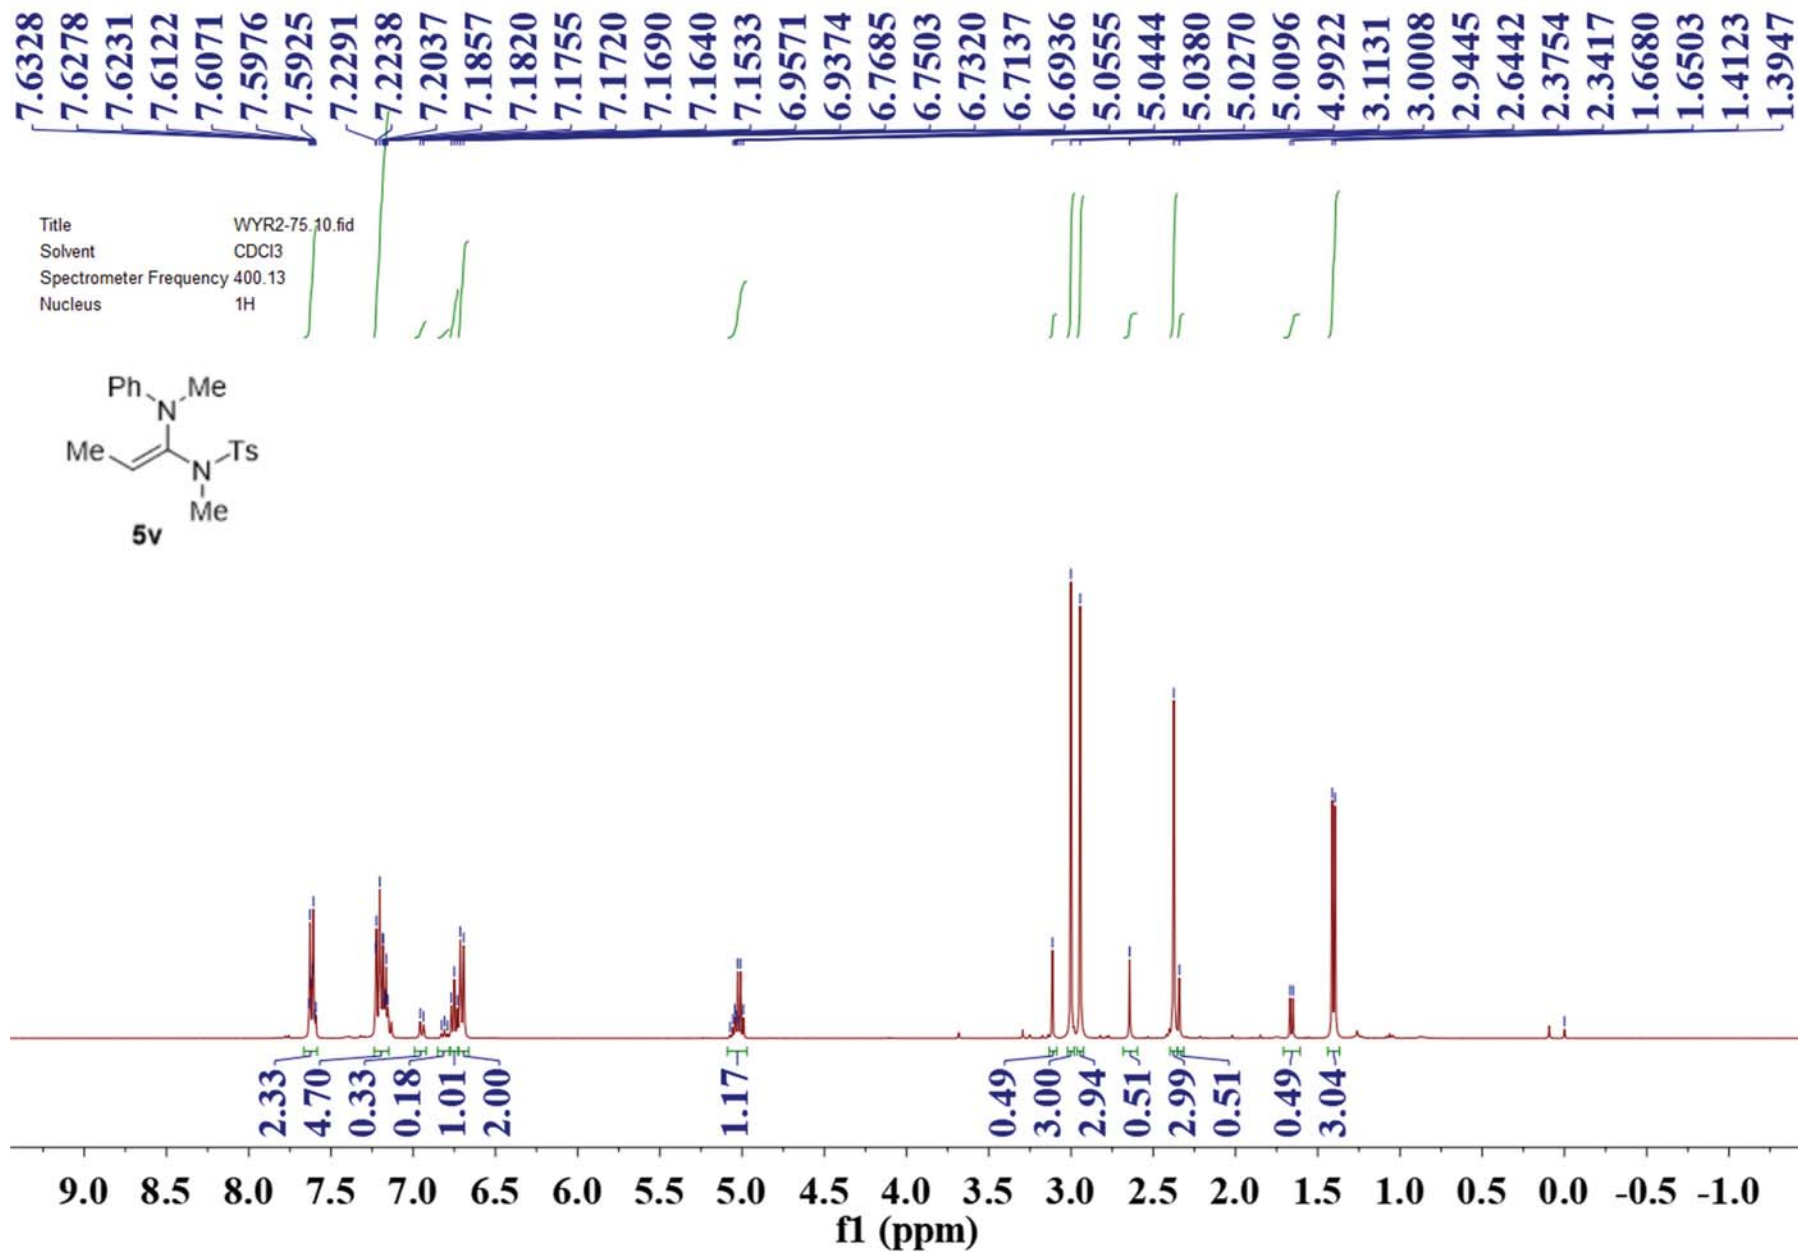

148.148  
146.310  
143.845  
143.335  
143.101  
140.057  
137.022  
136.304  
129.412  
129.267  
128.896  
128.683  
127.283  
127.209  
119.706  
118.192  
117.253  
113.848  
113.261  
113.144  
77.519  
77.200  
76.881

37.914  
37.242  
36.829  
36.126  
21.516  
21.479  
12.944  
12.833

Title WYR2-75.10.fid  
Solvent CDCl3  
Spectrometer Frequency 100.62  
Nucleus 13C

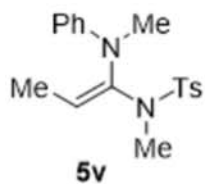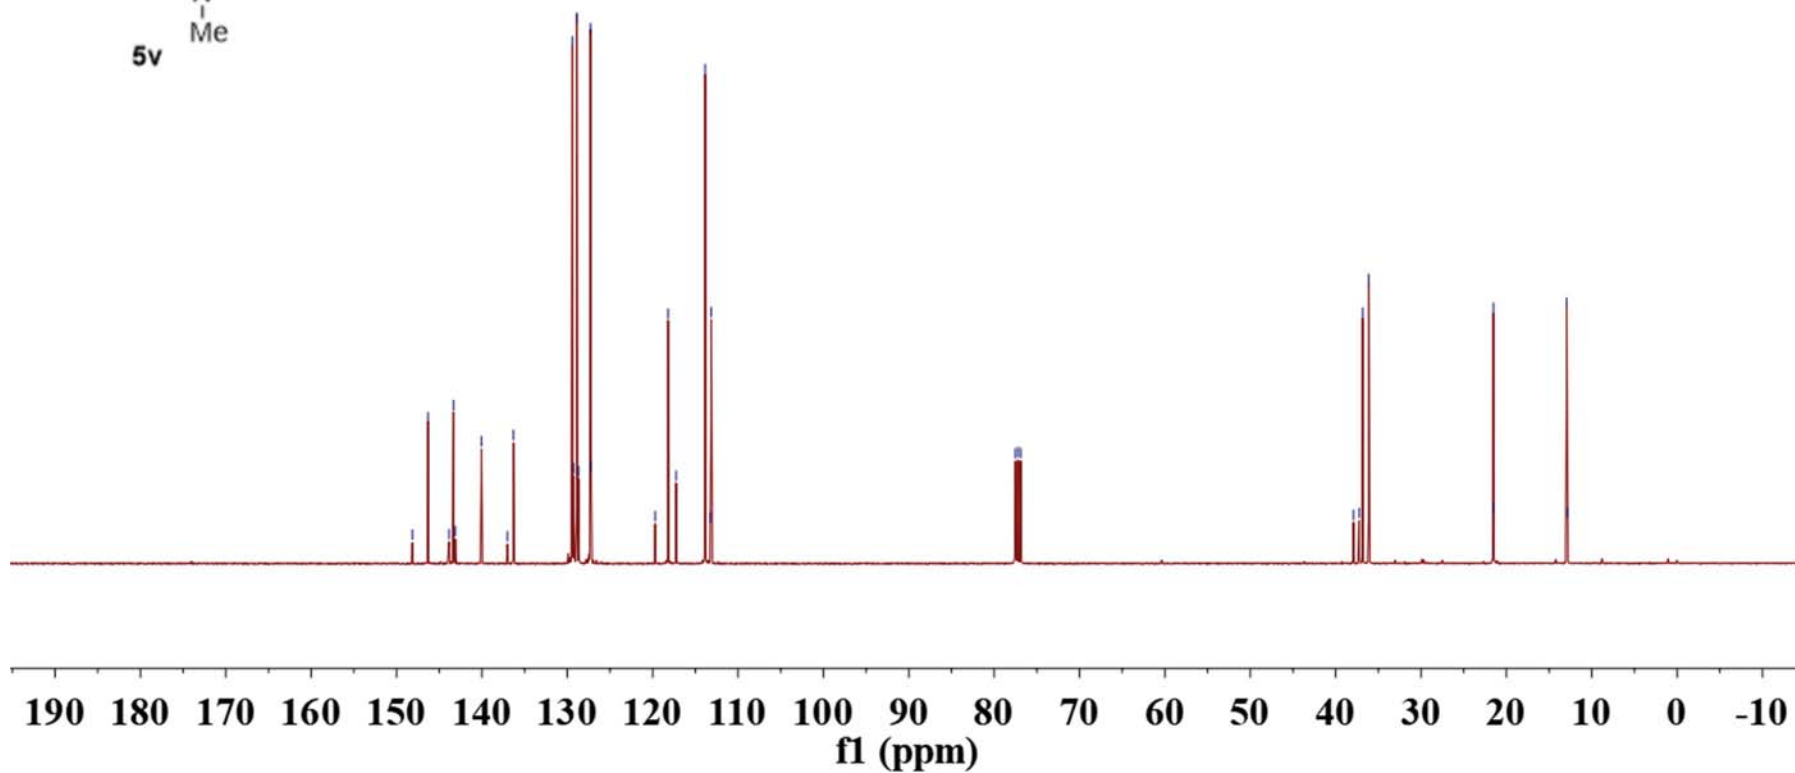

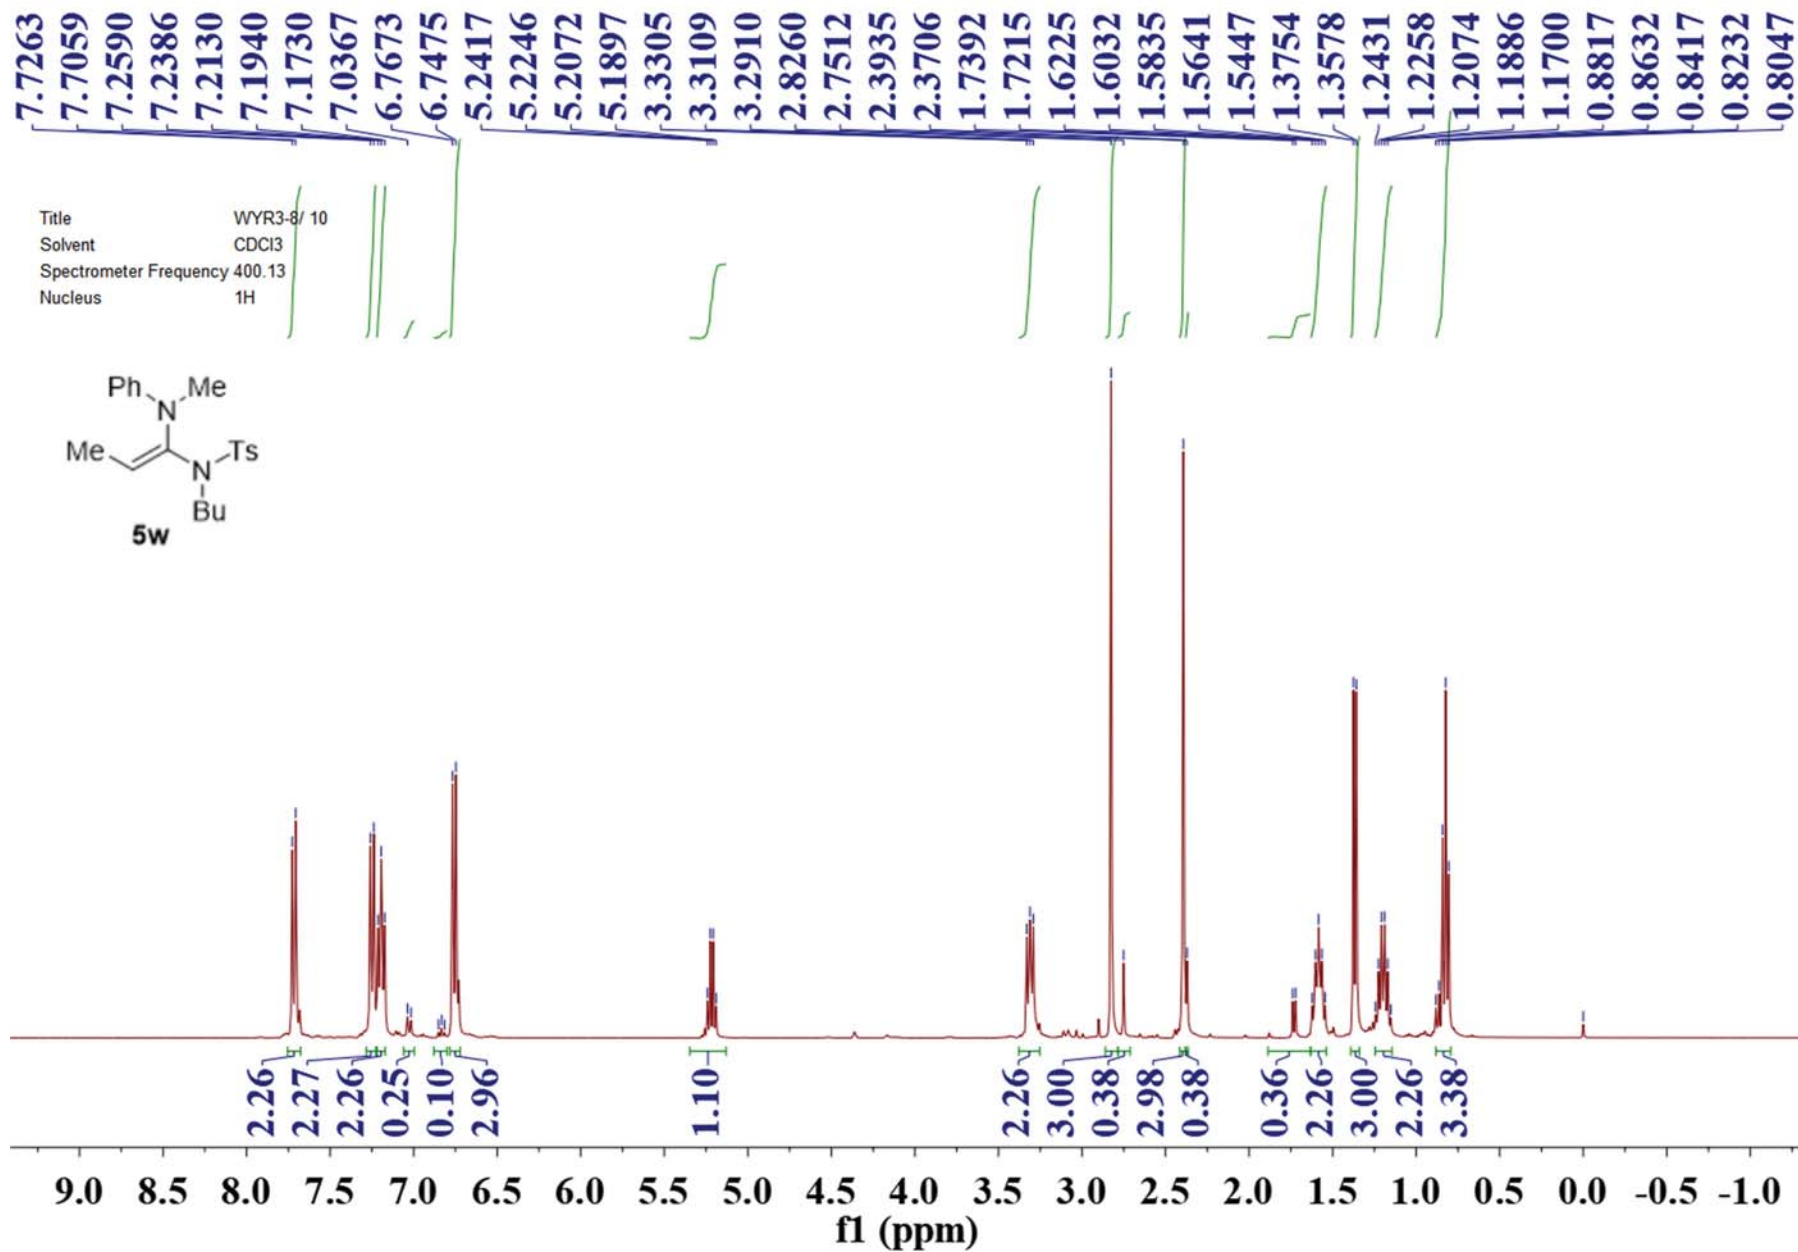

148.891  
 146.569  
 143.288  
 143.208  
 140.408  
 137.816  
 137.704  
 137.226  
 129.416  
 129.374  
 128.955  
 128.849  
 127.606  
 127.573  
 119.965  
 118.230  
 117.691  
 116.210  
 114.945  
 113.899  
 77.519  
 77.200  
 76.882  
 48.464  
 48.120  
 37.090  
 34.990  
 31.233  
 30.941  
 21.534  
 21.499  
 20.074  
 19.974  
 13.982  
 13.786  
 13.742  
 13.370

Title WYR3-8/ 10  
 Solvent CDCl3  
 Spectrometer Frequency 100.62  
 Nucleus 13C

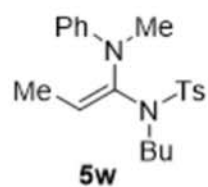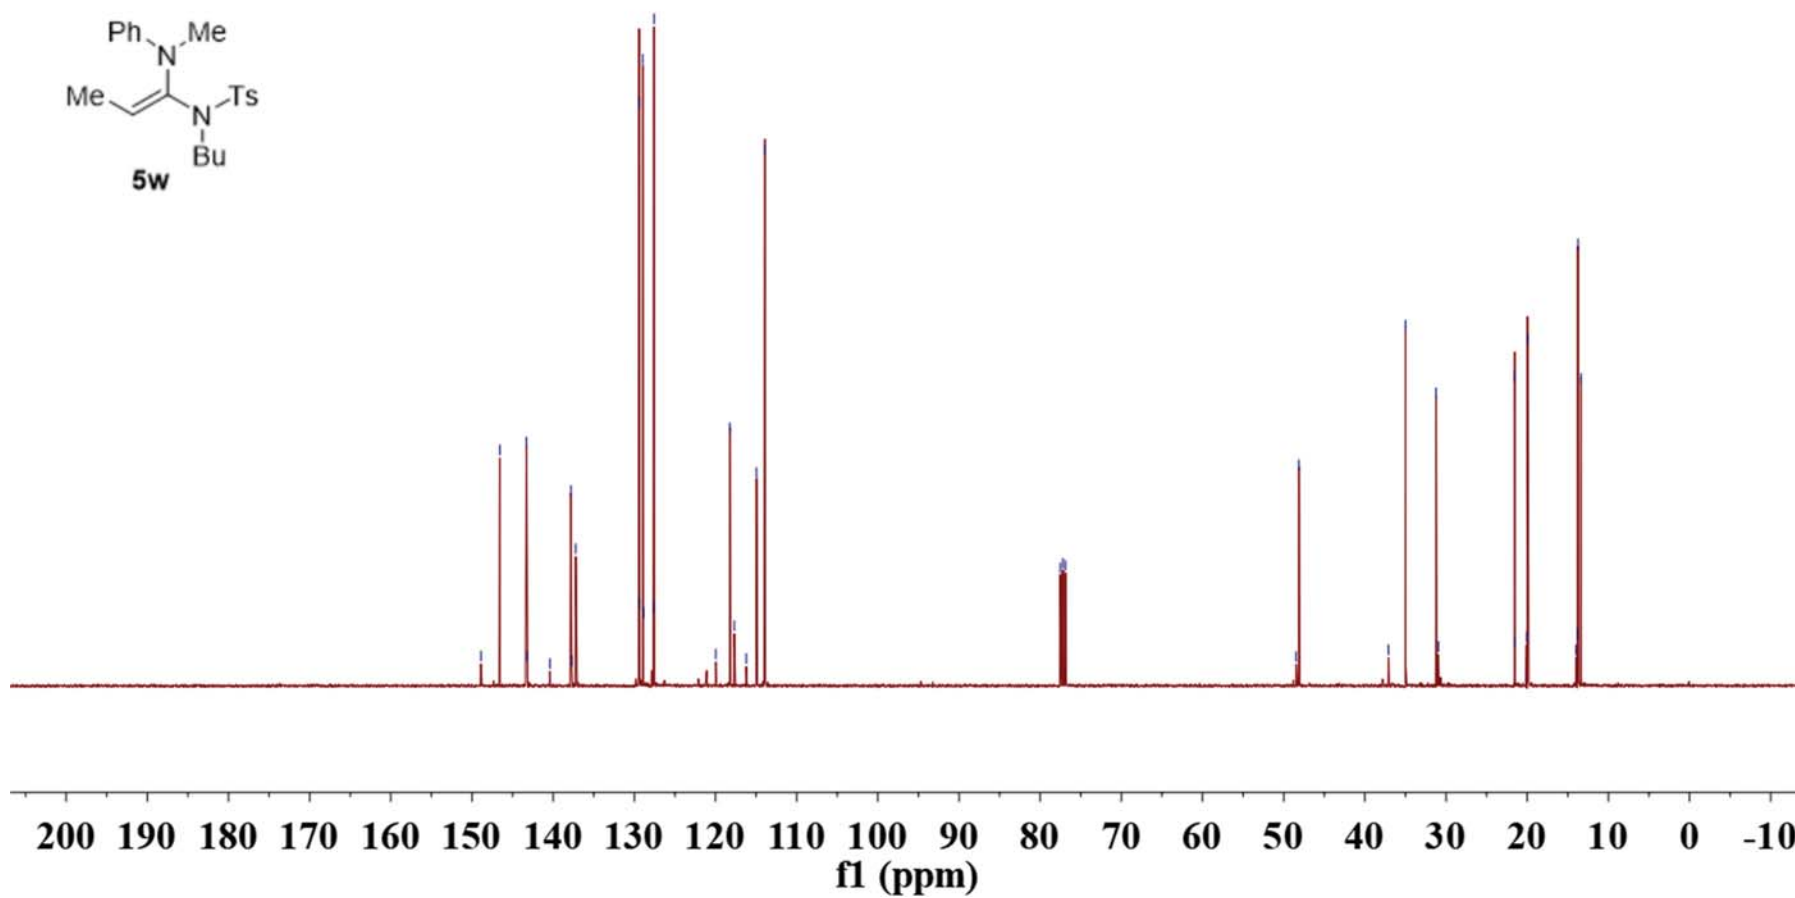

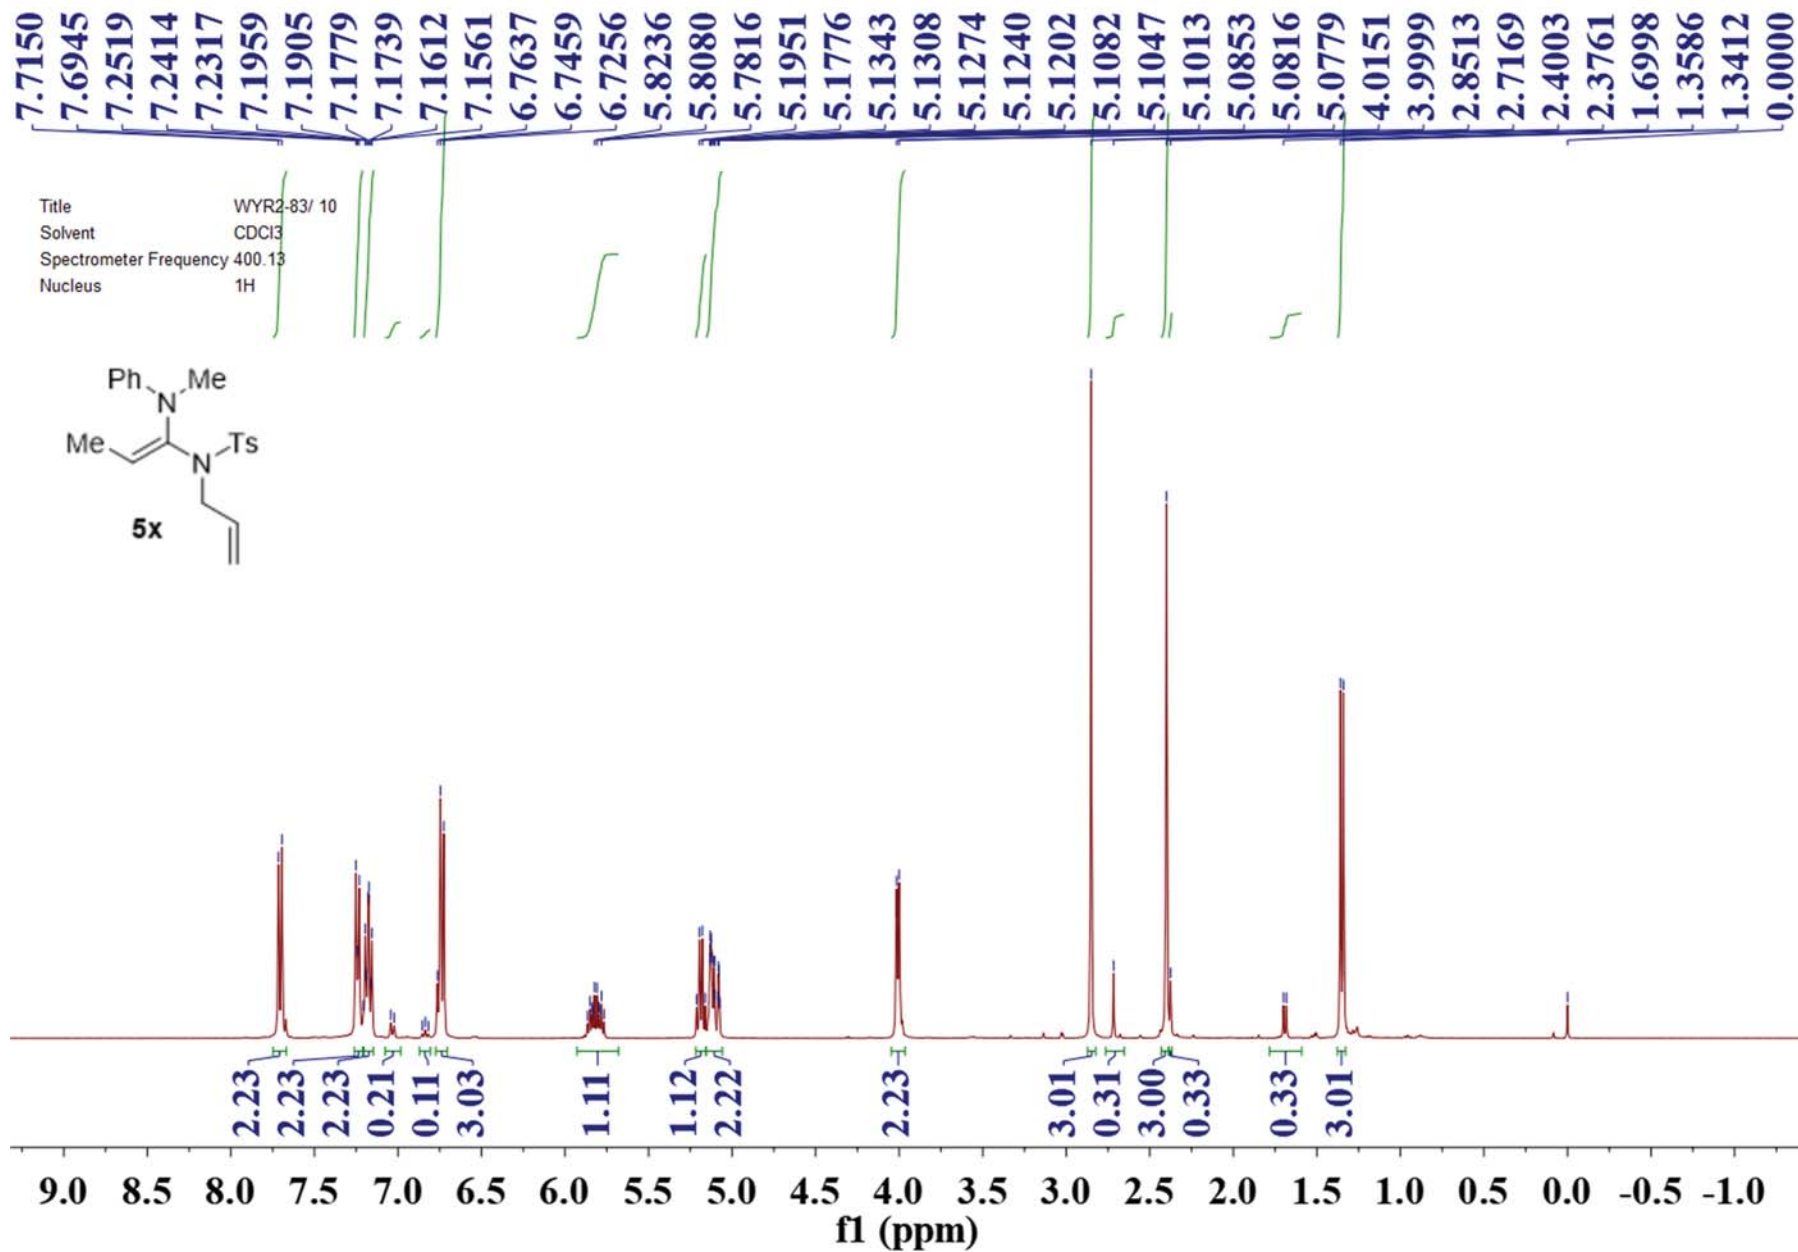

146.564  
 143.435  
 137.927  
 137.604  
 134.017  
 133.617  
 129.489  
 129.412  
 128.949  
 128.807  
 127.677  
 127.615  
 120.019  
 118.834  
 118.310  
 118.229  
 117.911  
 115.469  
 115.123  
 114.017  
 77.518  
 77.200  
 76.882  
 52.059  
 50.847  
 36.949  
 35.190  
 21.625  
 21.594  
 13.894  
 13.254

Title WYR2-83.10.fid  
 Solvent CDCl3  
 Spectrometer Frequency 100.62  
 Nucleus 13C

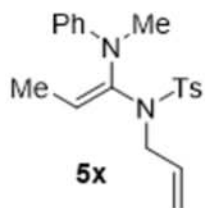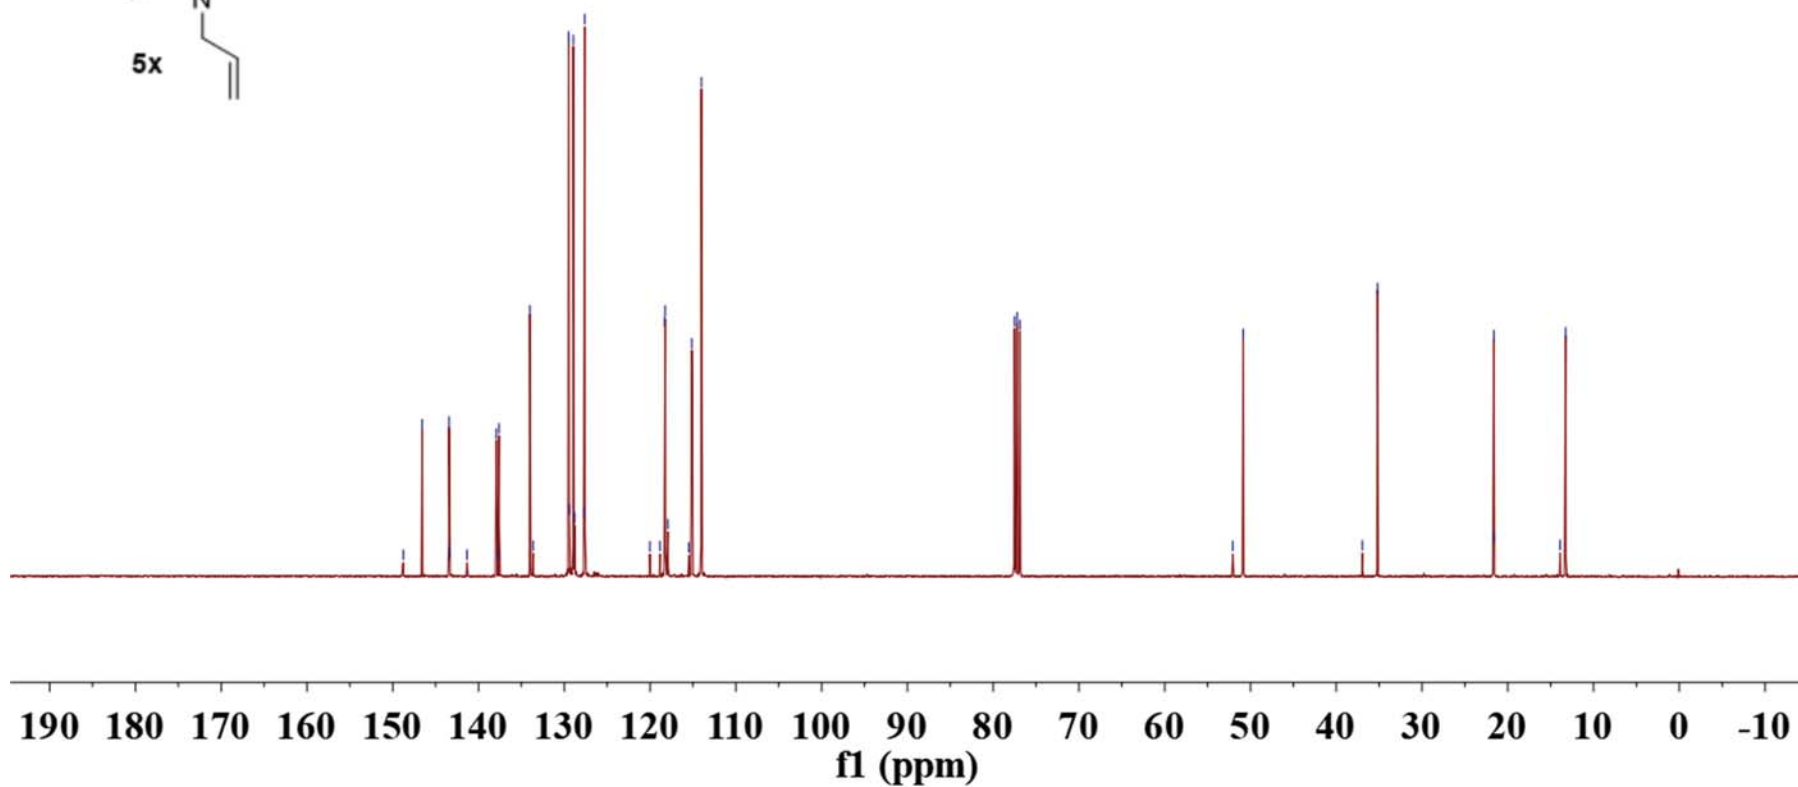

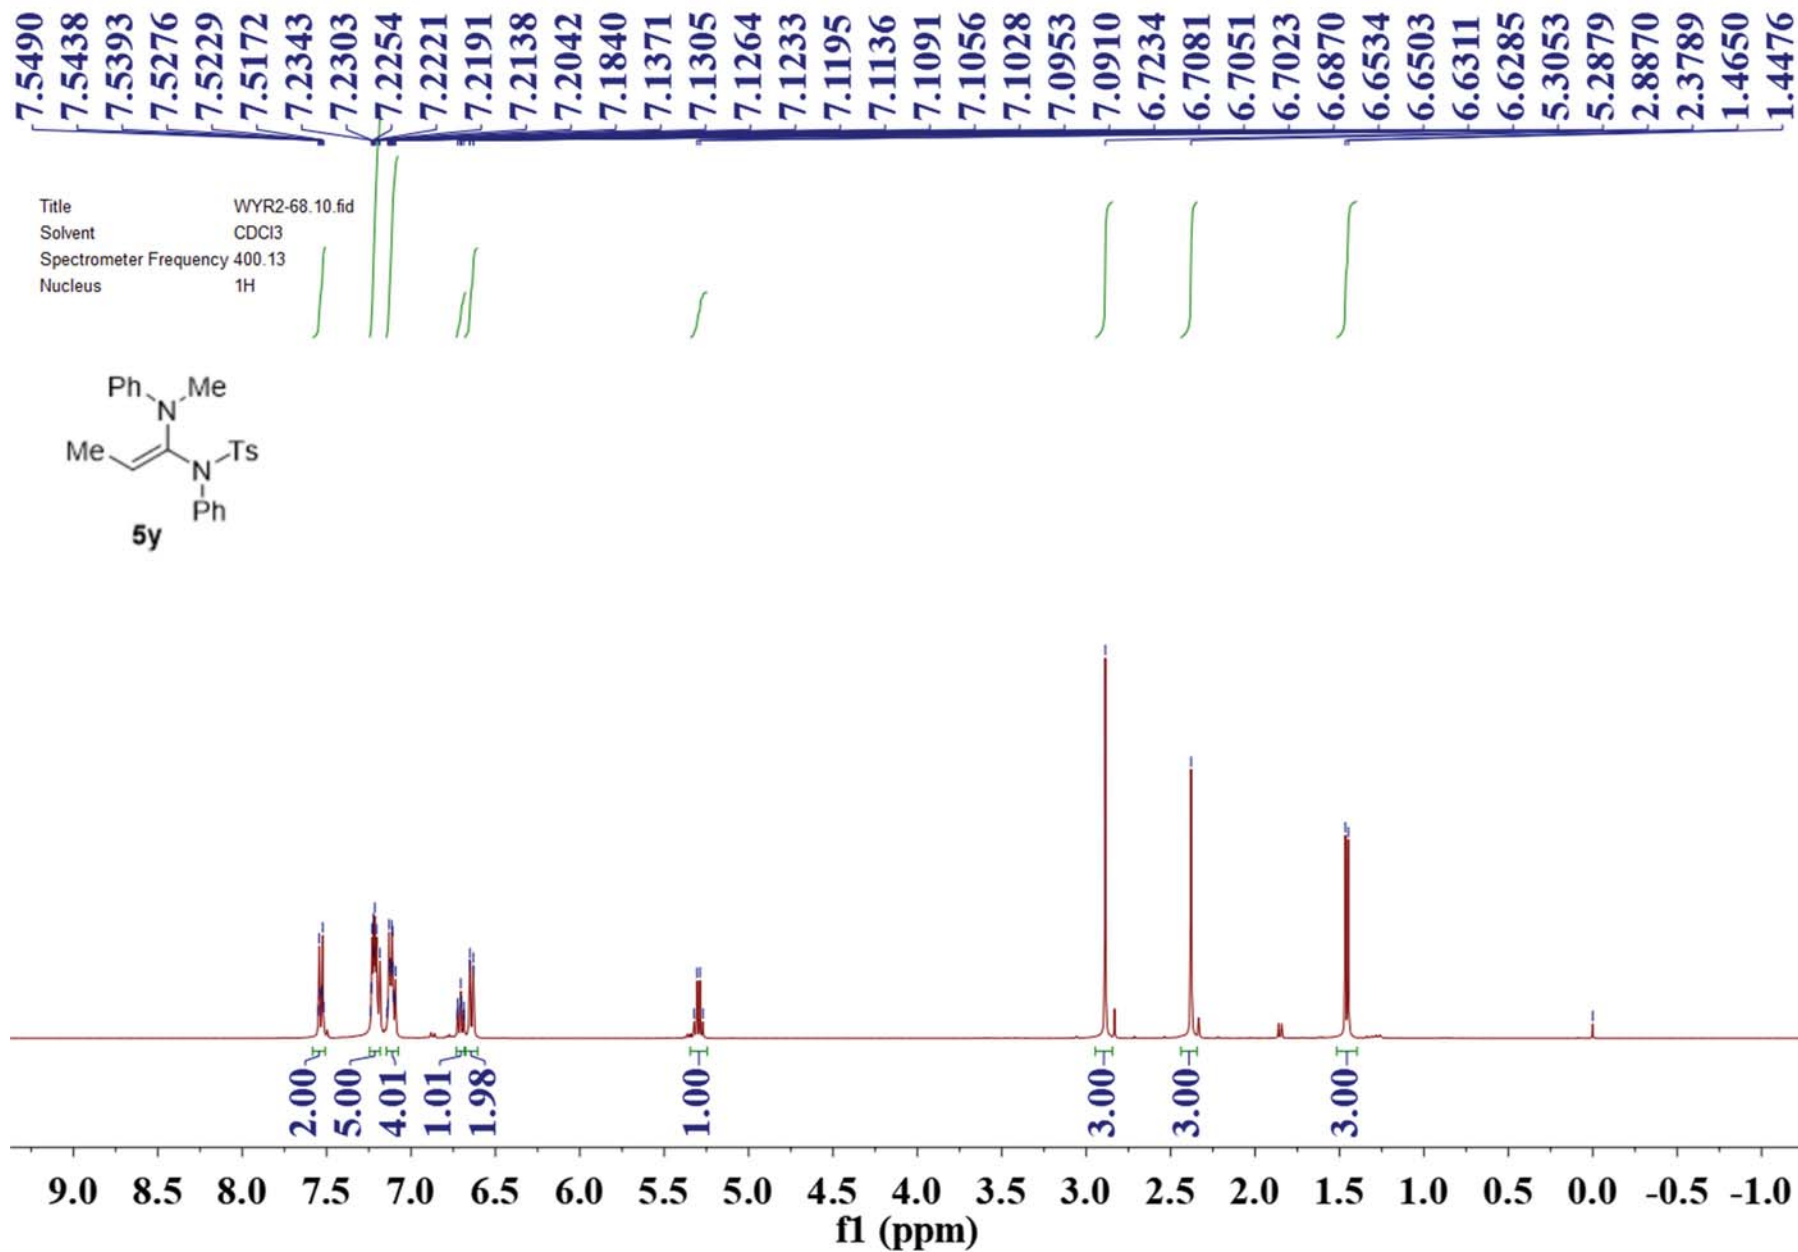



146.098  
 143.538  
 140.144  
 138.781  
 137.567  
 129.869  
 129.406  
 128.852  
 128.738  
 128.403  
 127.969  
 118.408  
 114.315  
 113.727  
  
 77.518  
 77.200  
 76.882  
  
 -36.757  
 -21.647  
 -13.070

Title WYR2-68/ 10  
 Solvent CDCl3  
 Spectrometer Frequency 100.62  
 Nucleus 13C

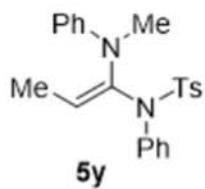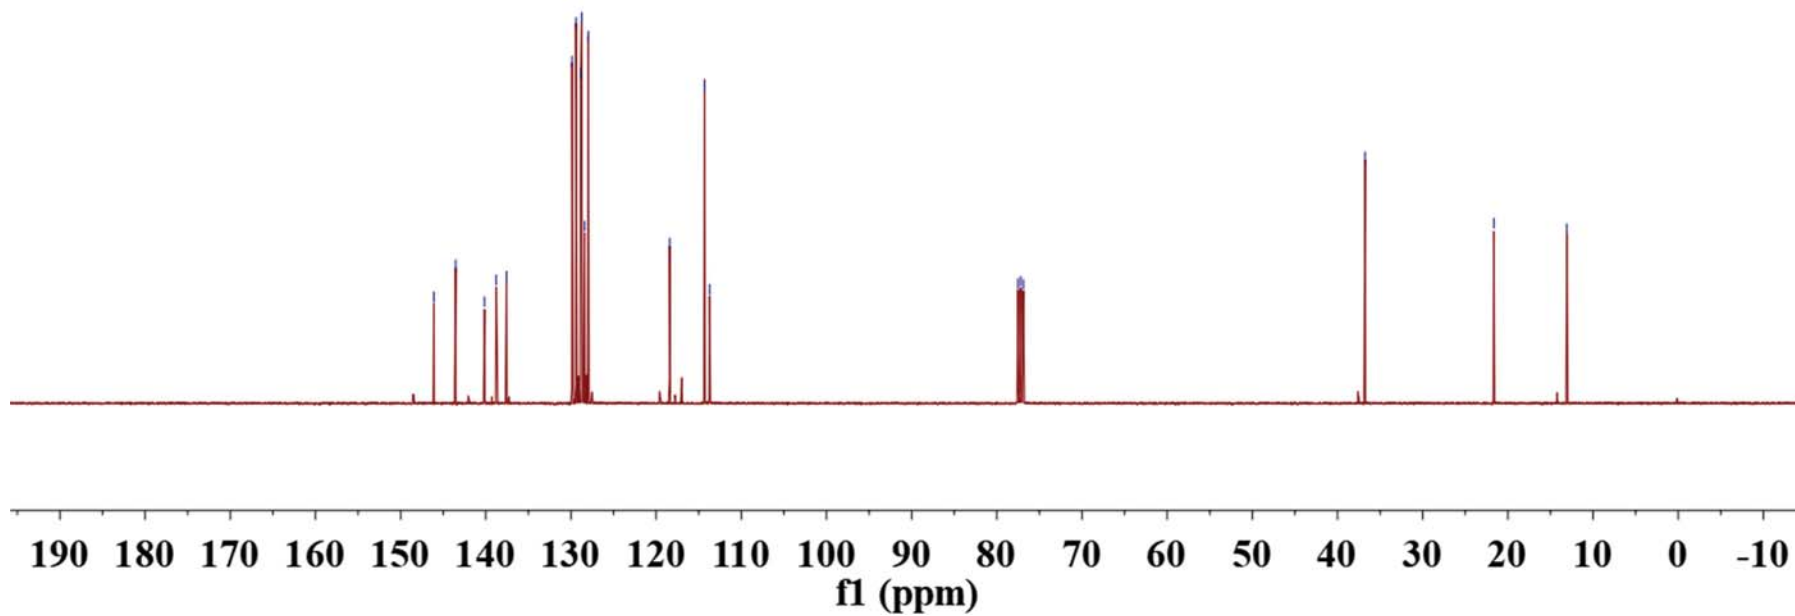

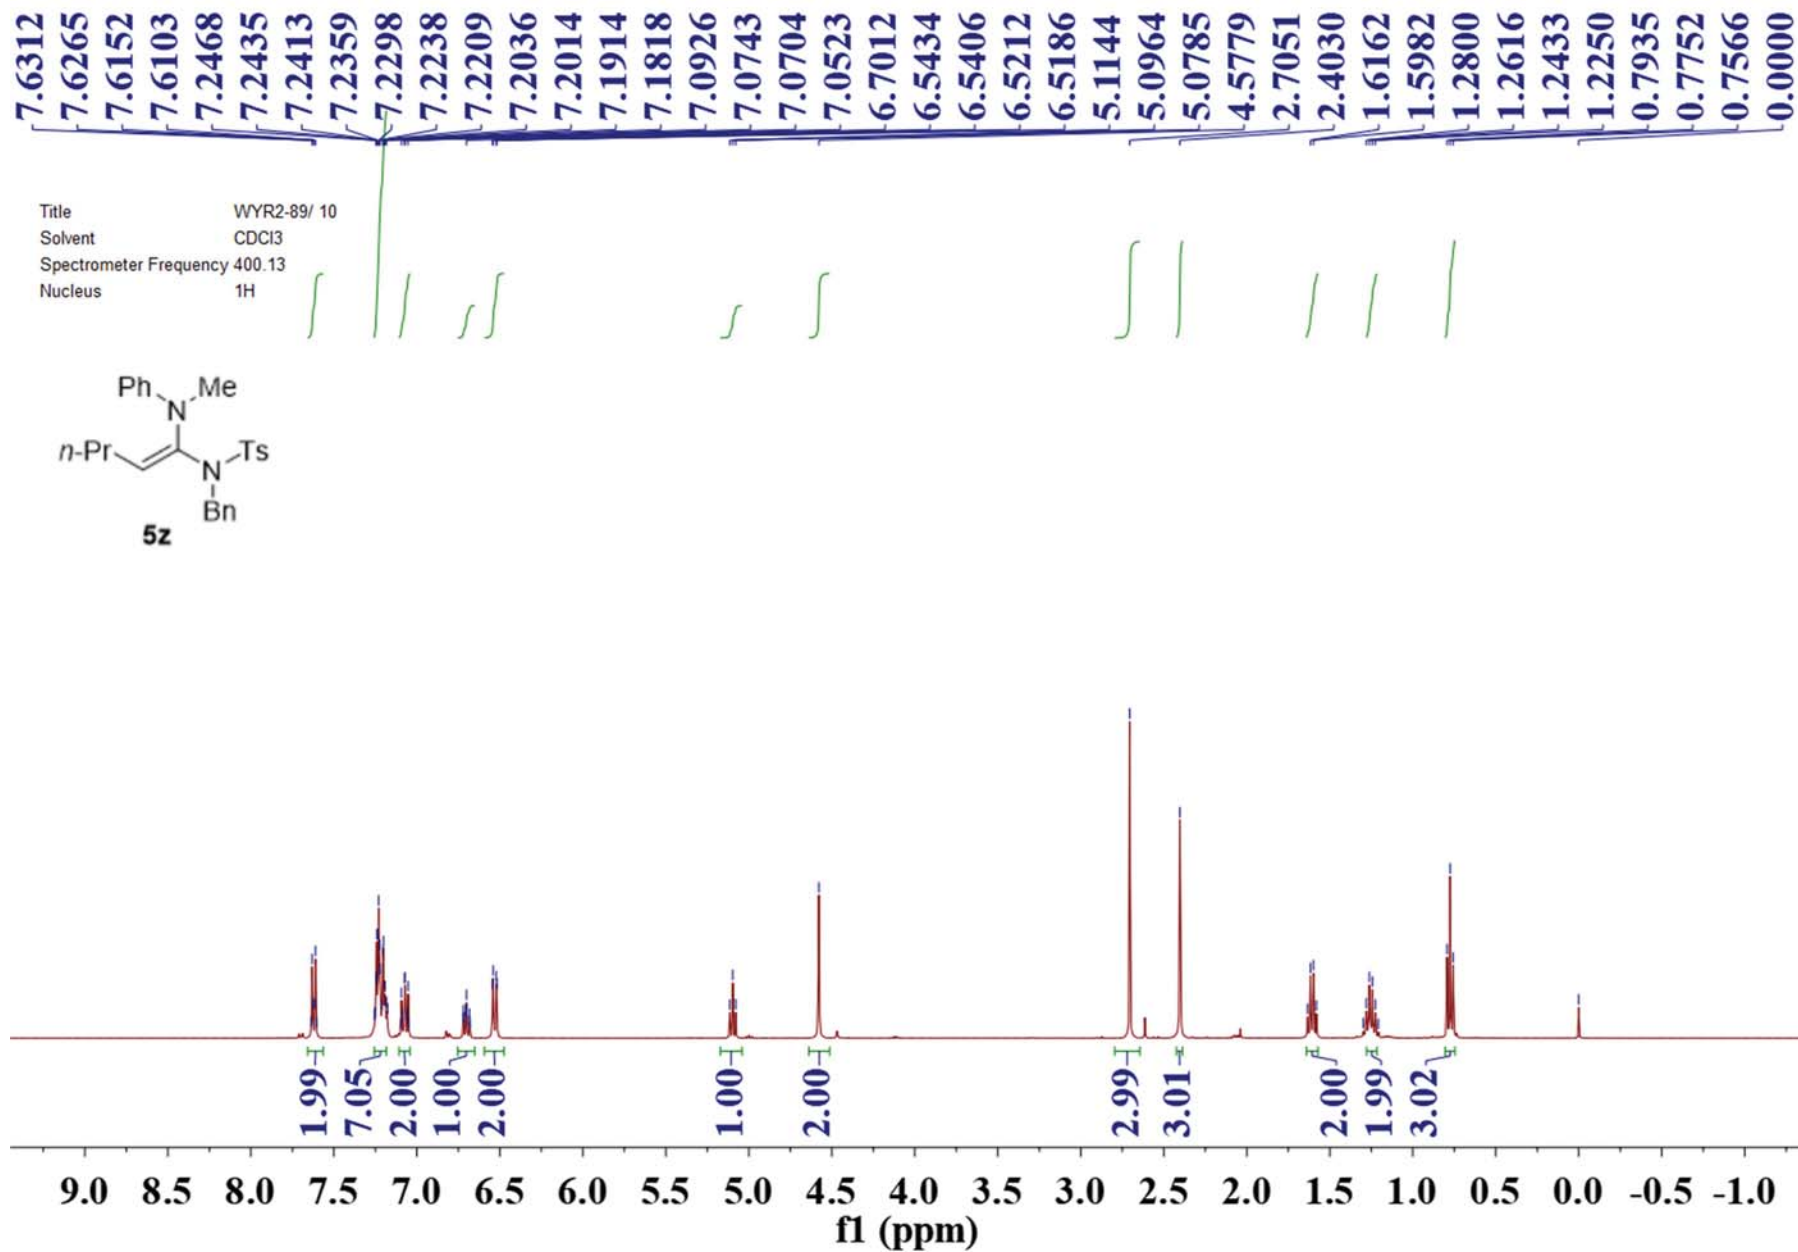

146.502  
 143.383  
 137.888  
 137.099  
 136.766  
 129.392  
 128.736  
 128.302  
 128.291  
 127.620  
 127.415  
 120.628  
 118.252  
 114.021

77.519  
 77.200  
 76.882

-51.626

-35.272  
 -29.658  
 22.003  
 21.546  
 -13.847

Title WYR2-89.10.fid  
 Solvent CDCl3  
 Spectrometer Frequency 100.62  
 Nucleus 13C

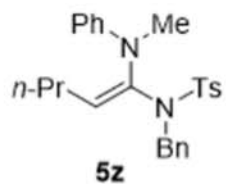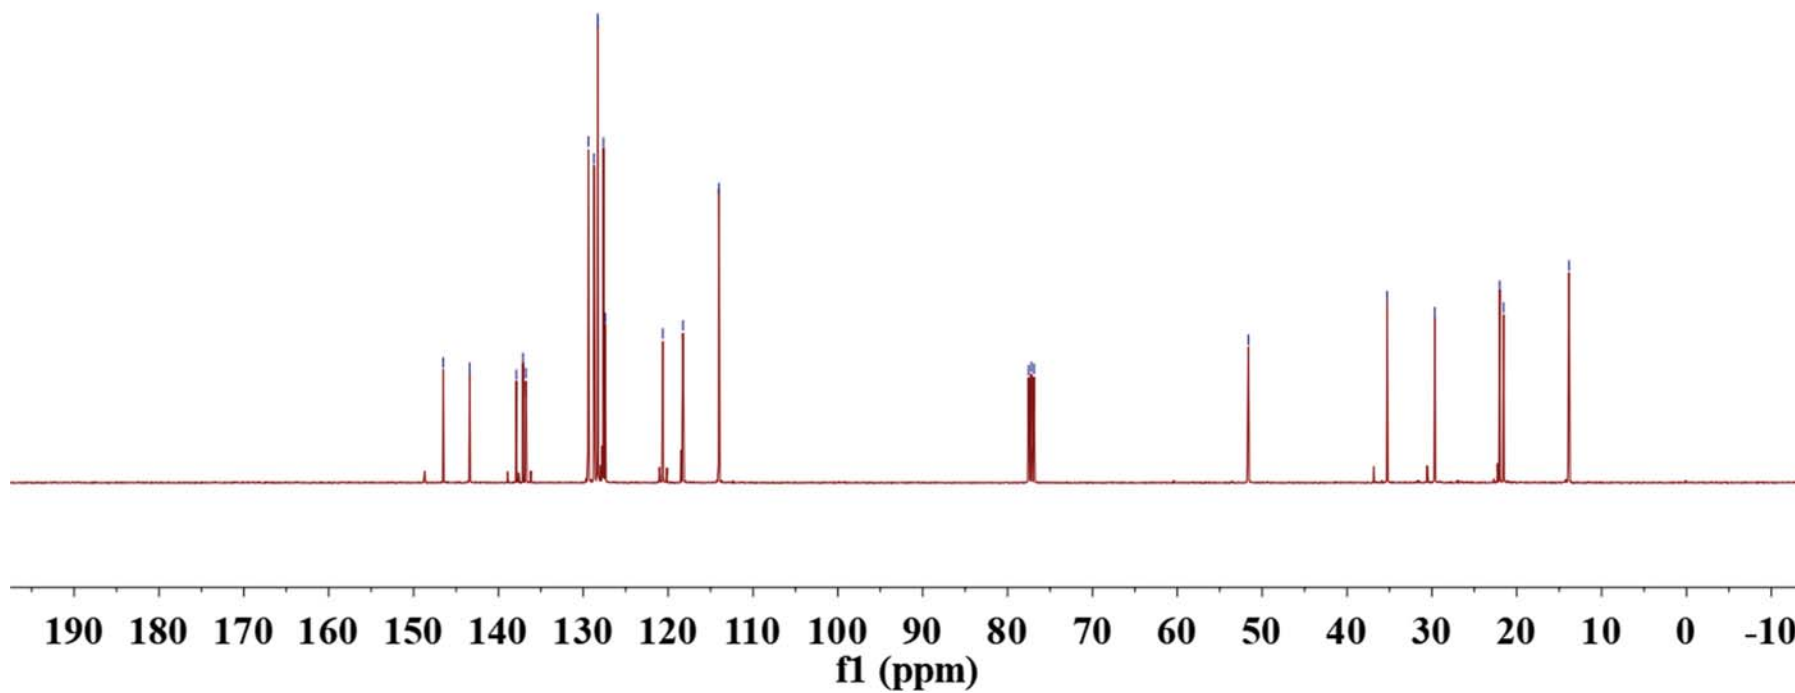

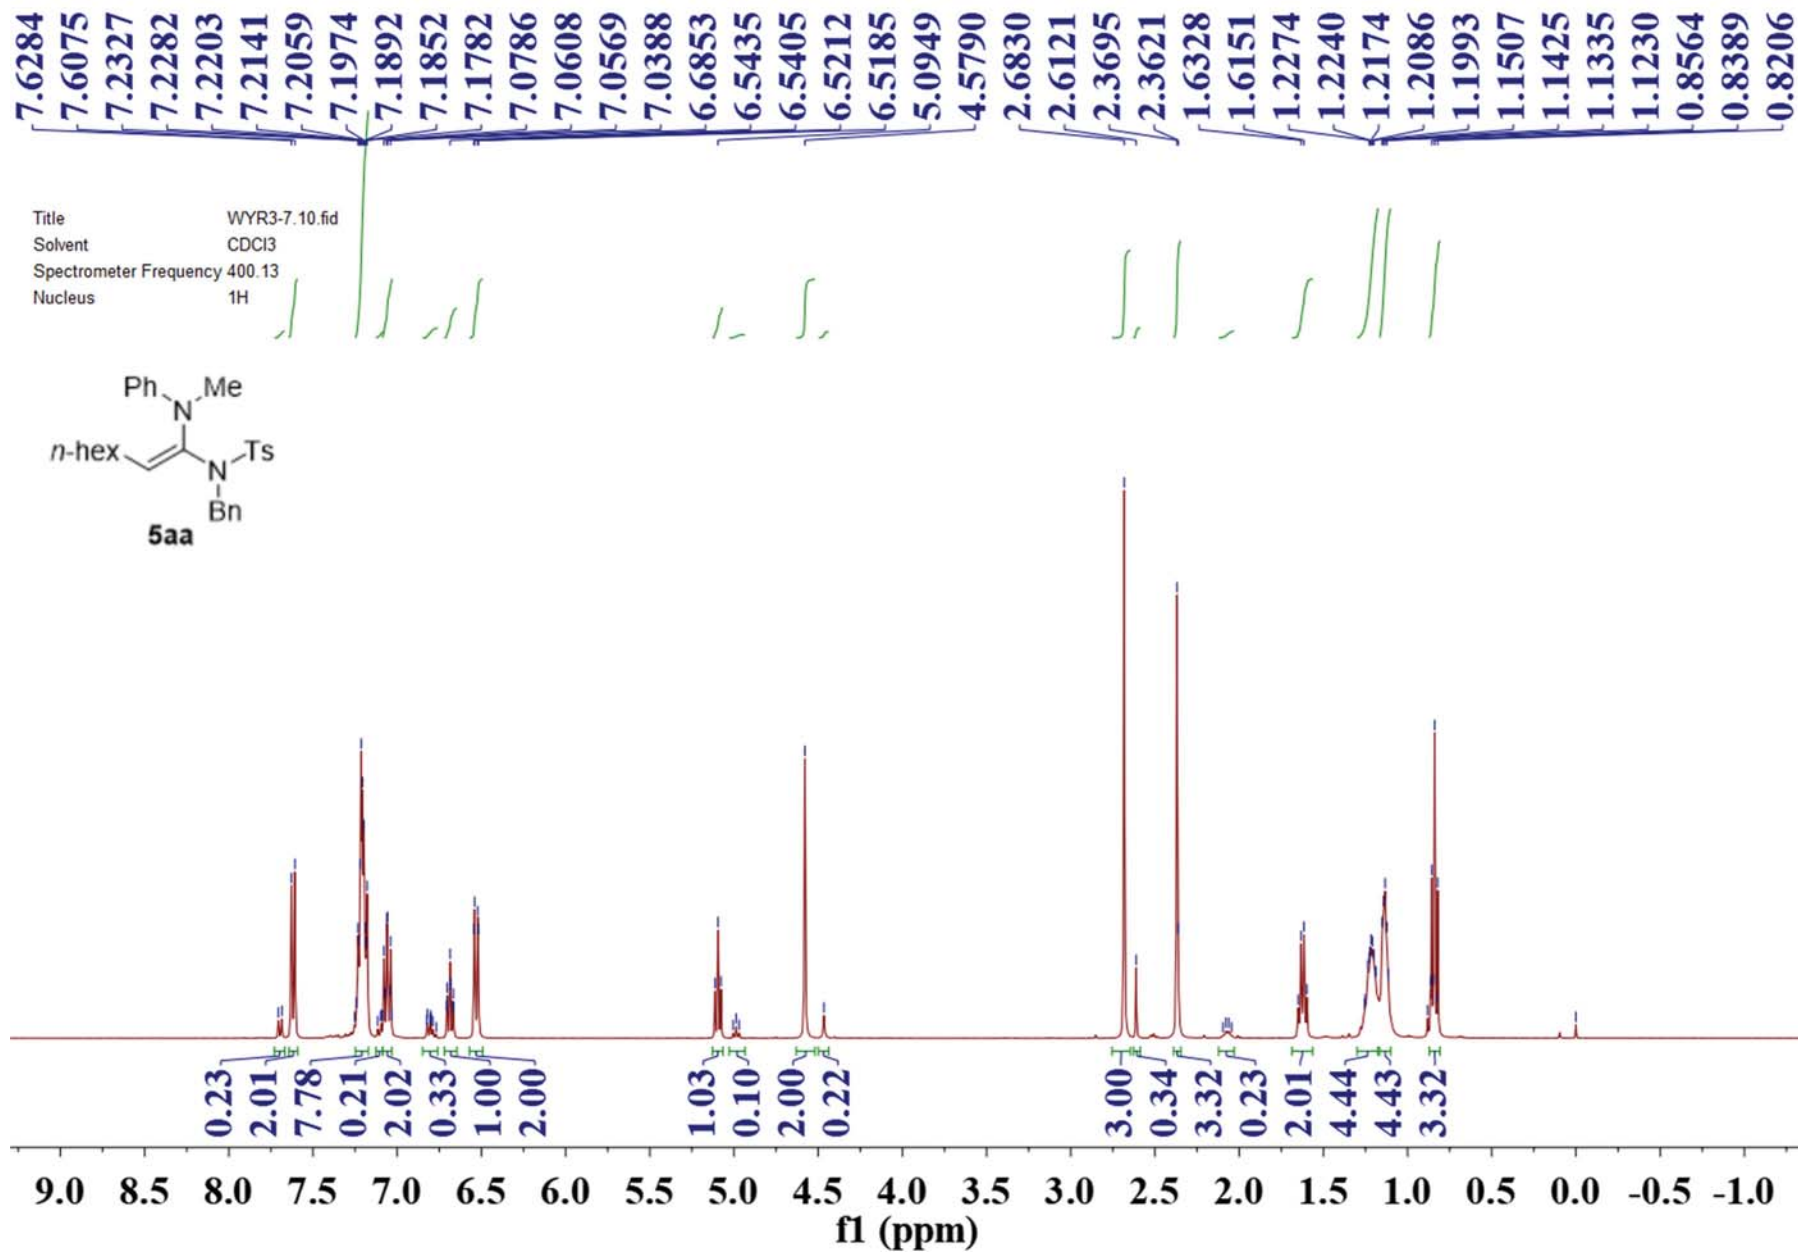

148.691  
 146.537  
 143.362  
 137.923  
 137.136  
 136.677  
 129.455  
 129.379  
 129.332  
 128.738  
 128.606  
 128.314  
 128.307  
 128.274  
 127.789  
 127.647  
 127.421  
 120.843  
 118.399  
 118.264  
 114.049  
 77.518  
 77.200  
 76.882  
 51.658  
 35.261  
 31.729  
 31.623  
 29.192  
 29.020  
 28.839  
 28.700  
 28.674  
 27.564  
 22.693  
 22.623  
 21.551  
 21.532  
 14.162  
 14.155

Title WYR3-7/ 10  
 Solvent CDCl<sub>3</sub>  
 Spectrometer Frequency 100.62  
 Nucleus <sup>13</sup>C

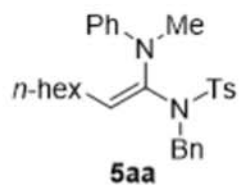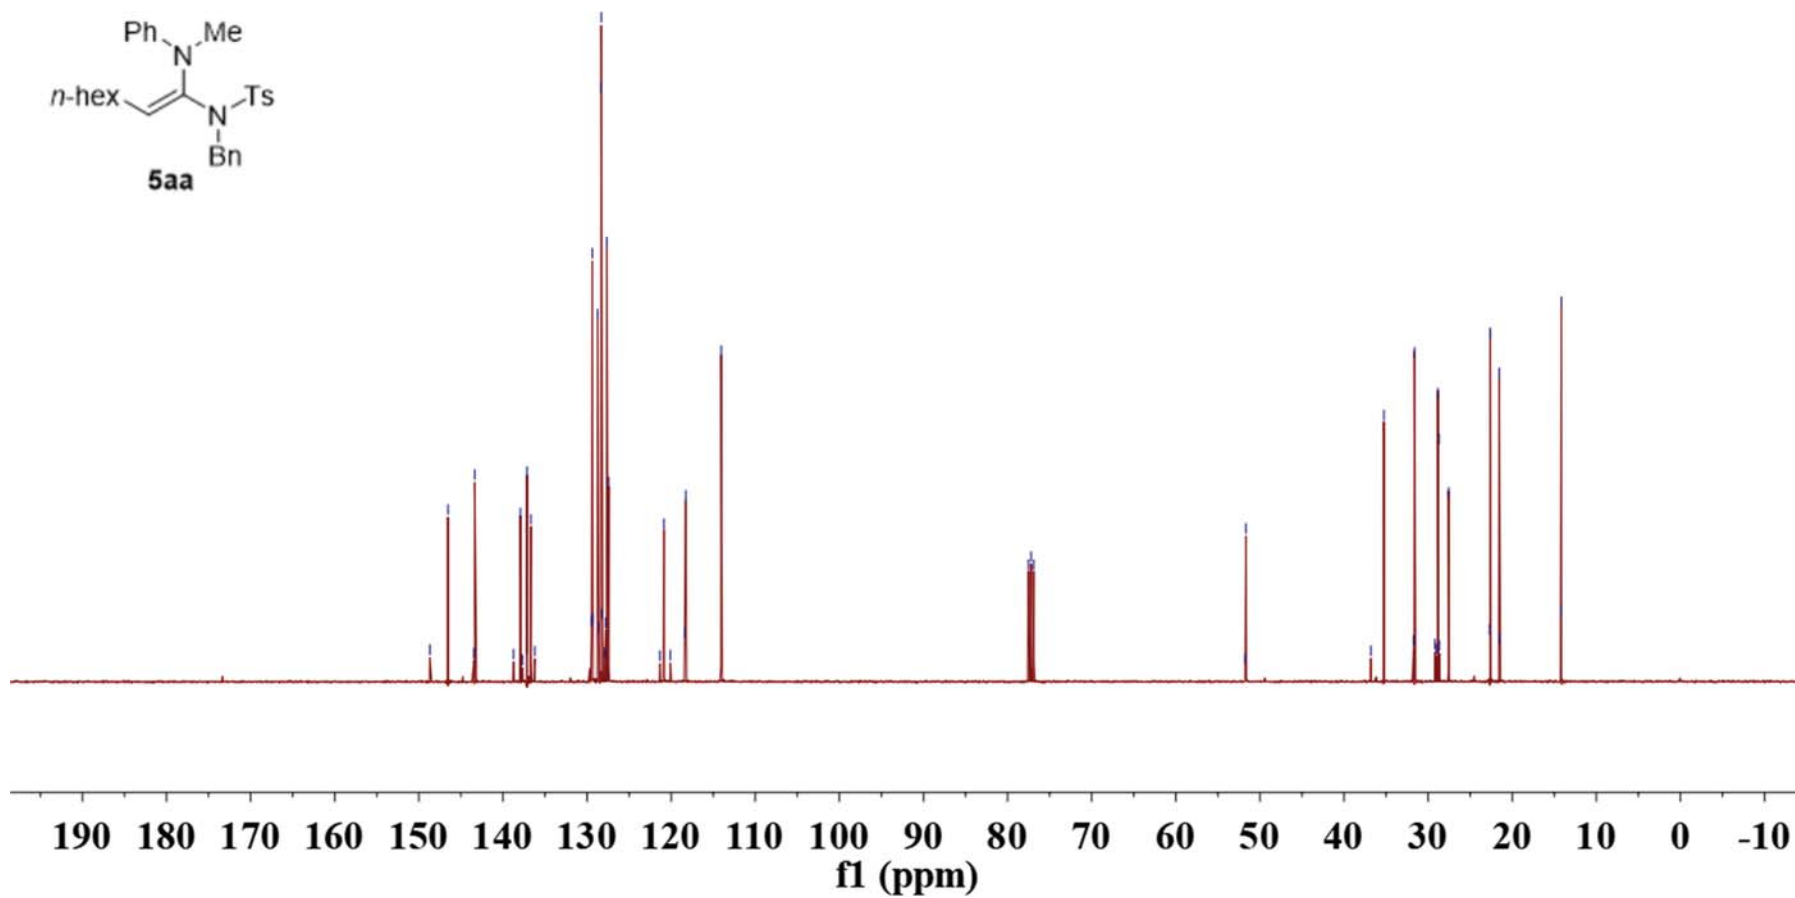

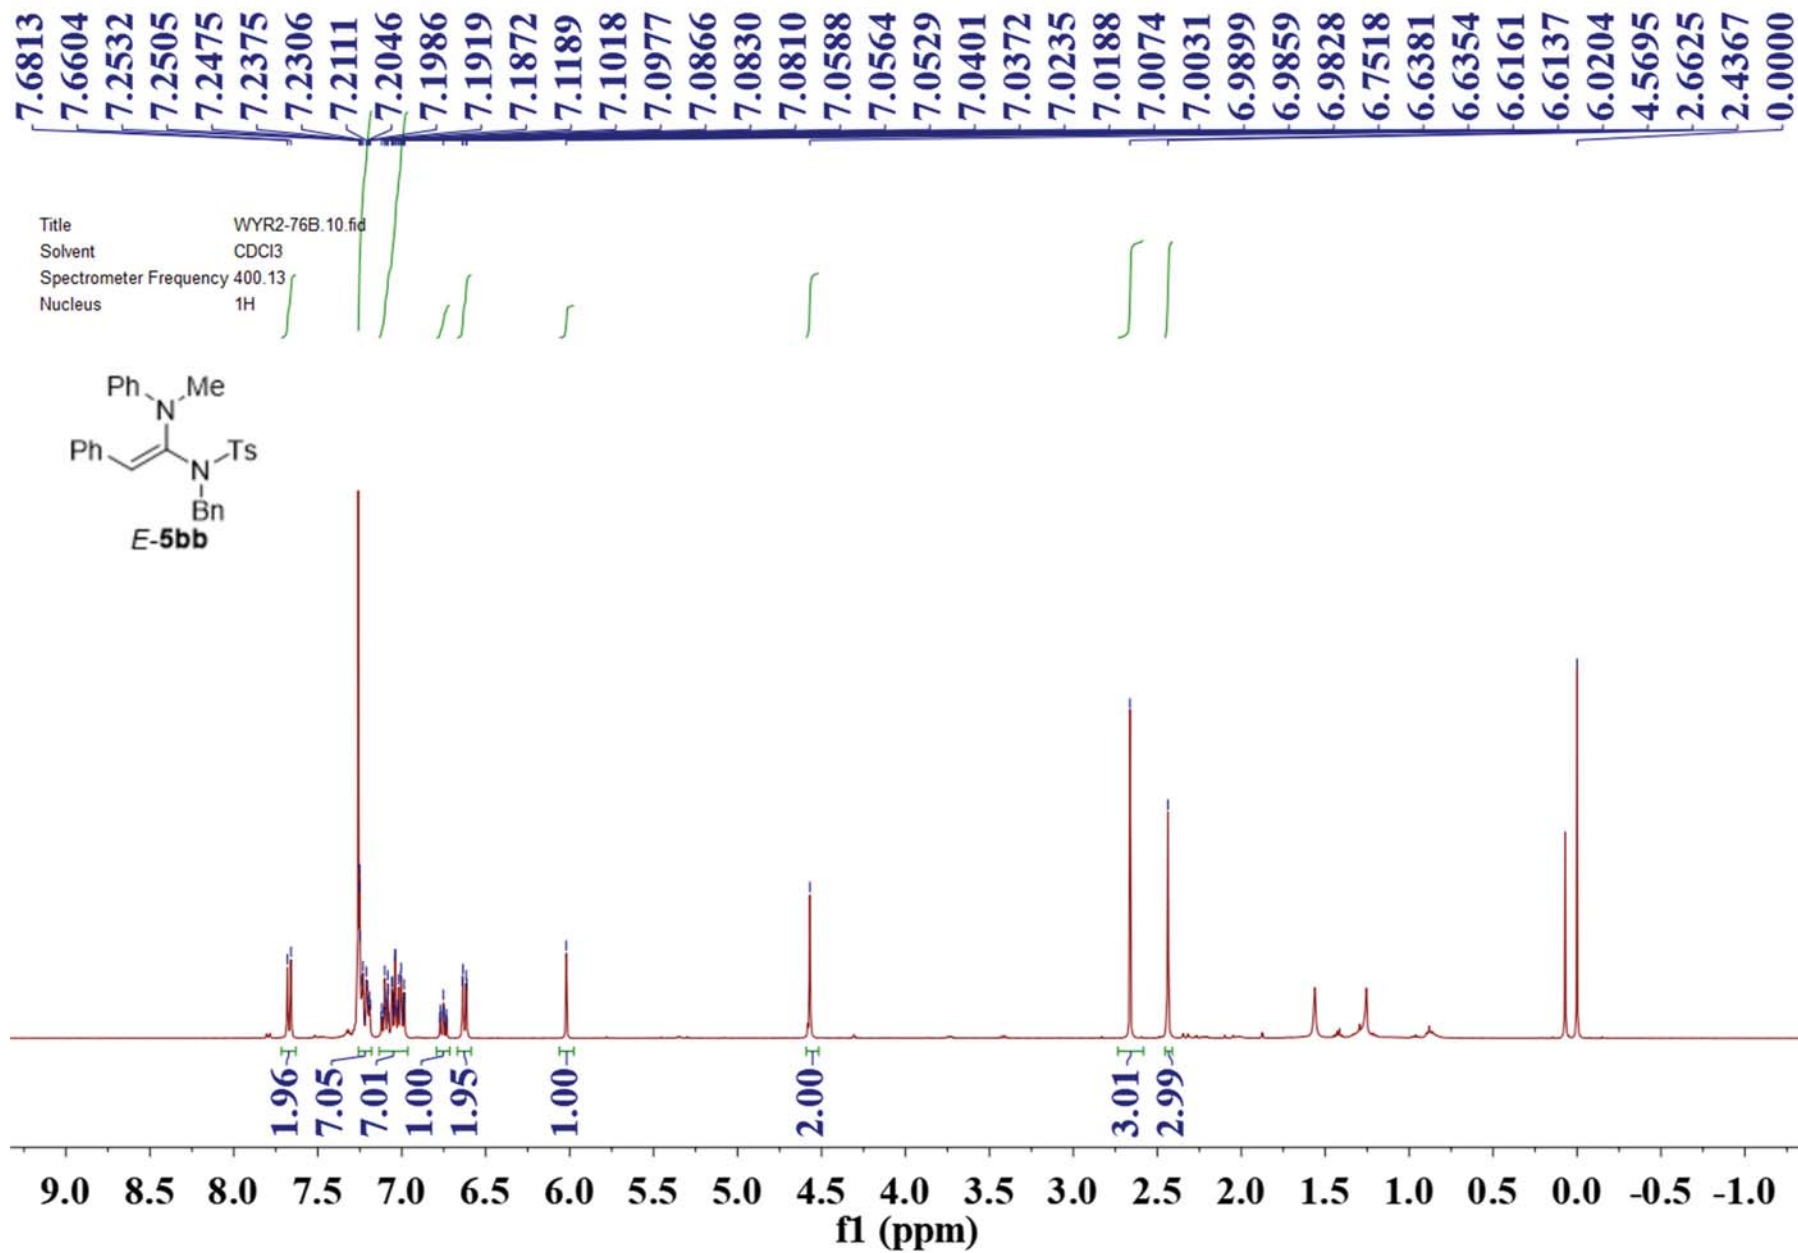

Title WYR2-76B/ 10  
Solvent CDCl3  
Spectrometer Frequency 100.62  
Nucleus 13C

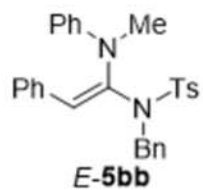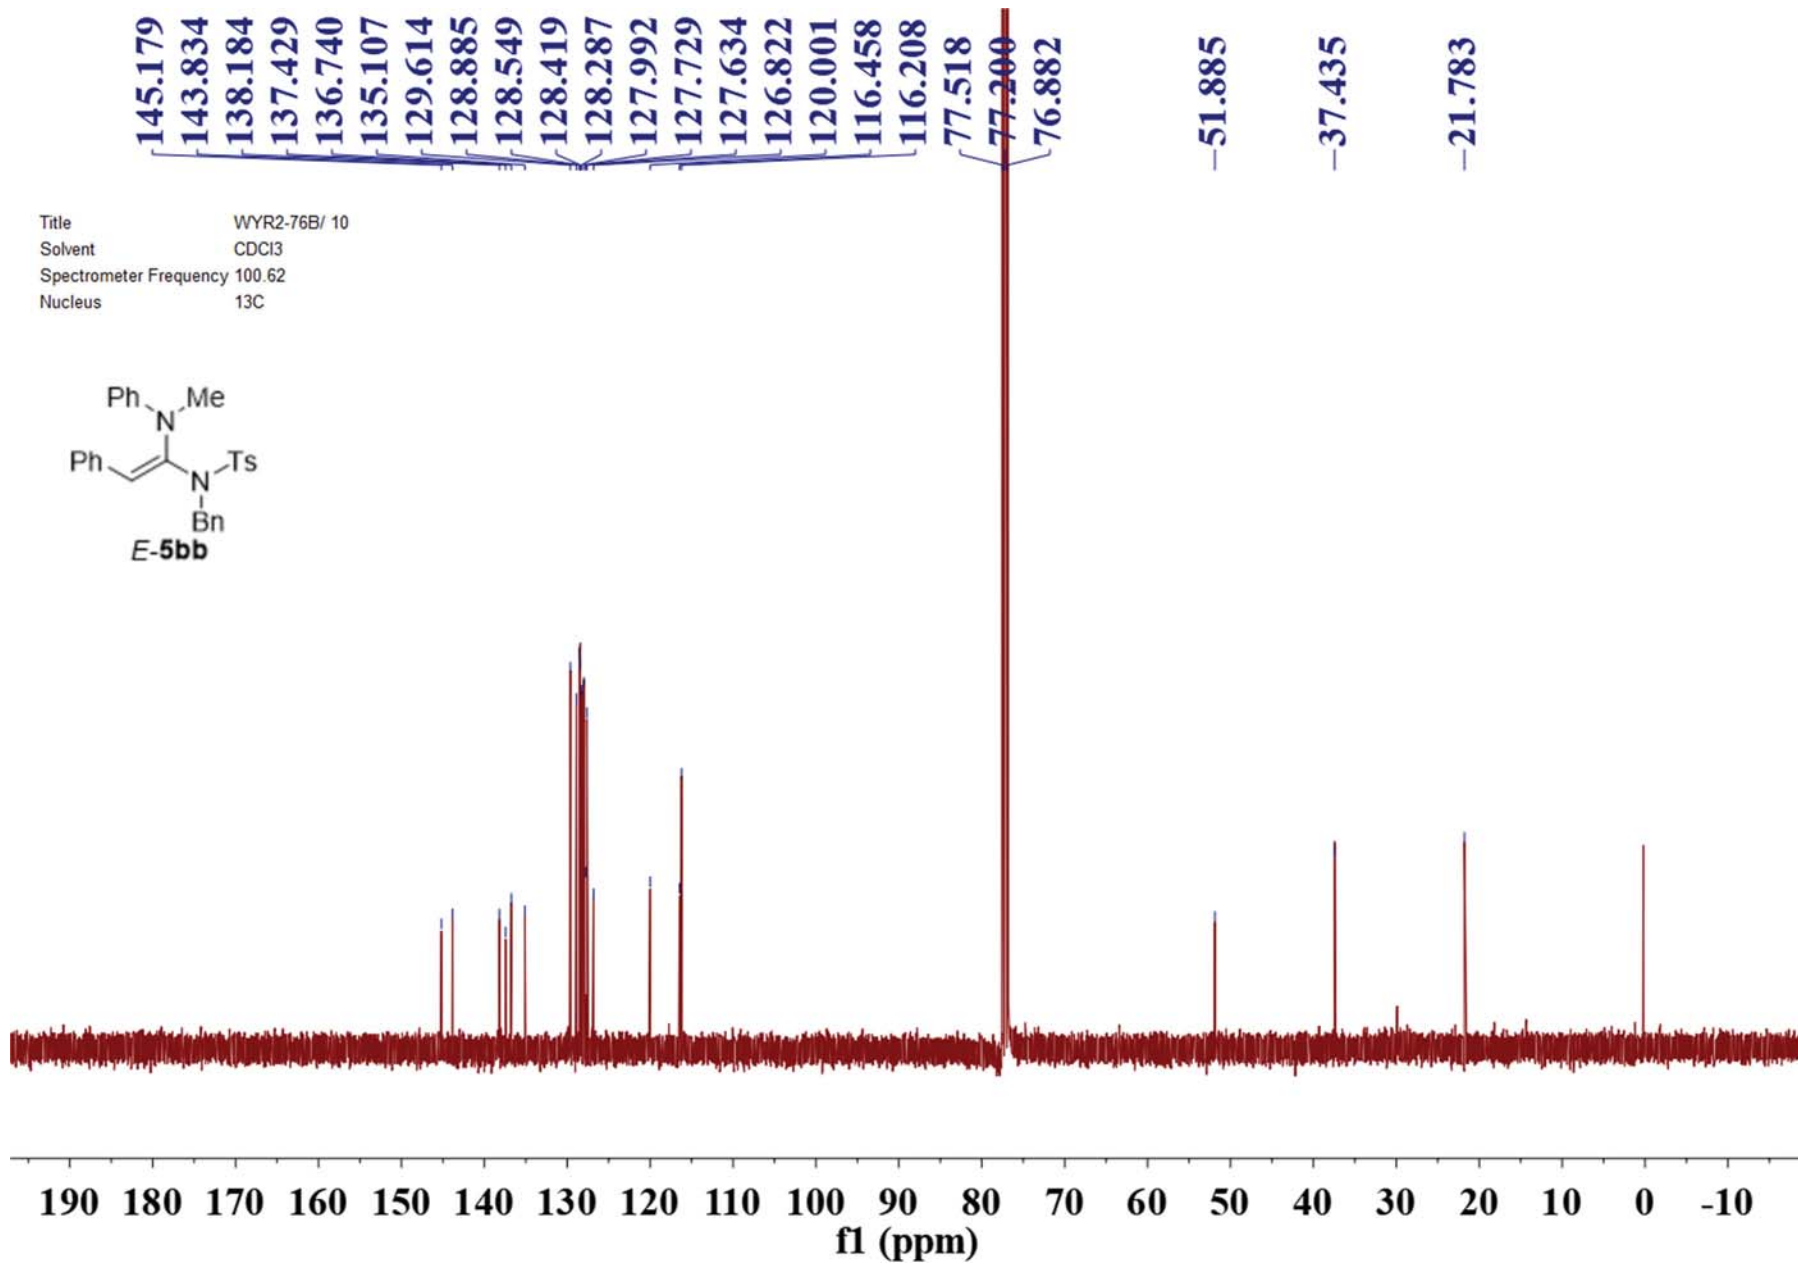

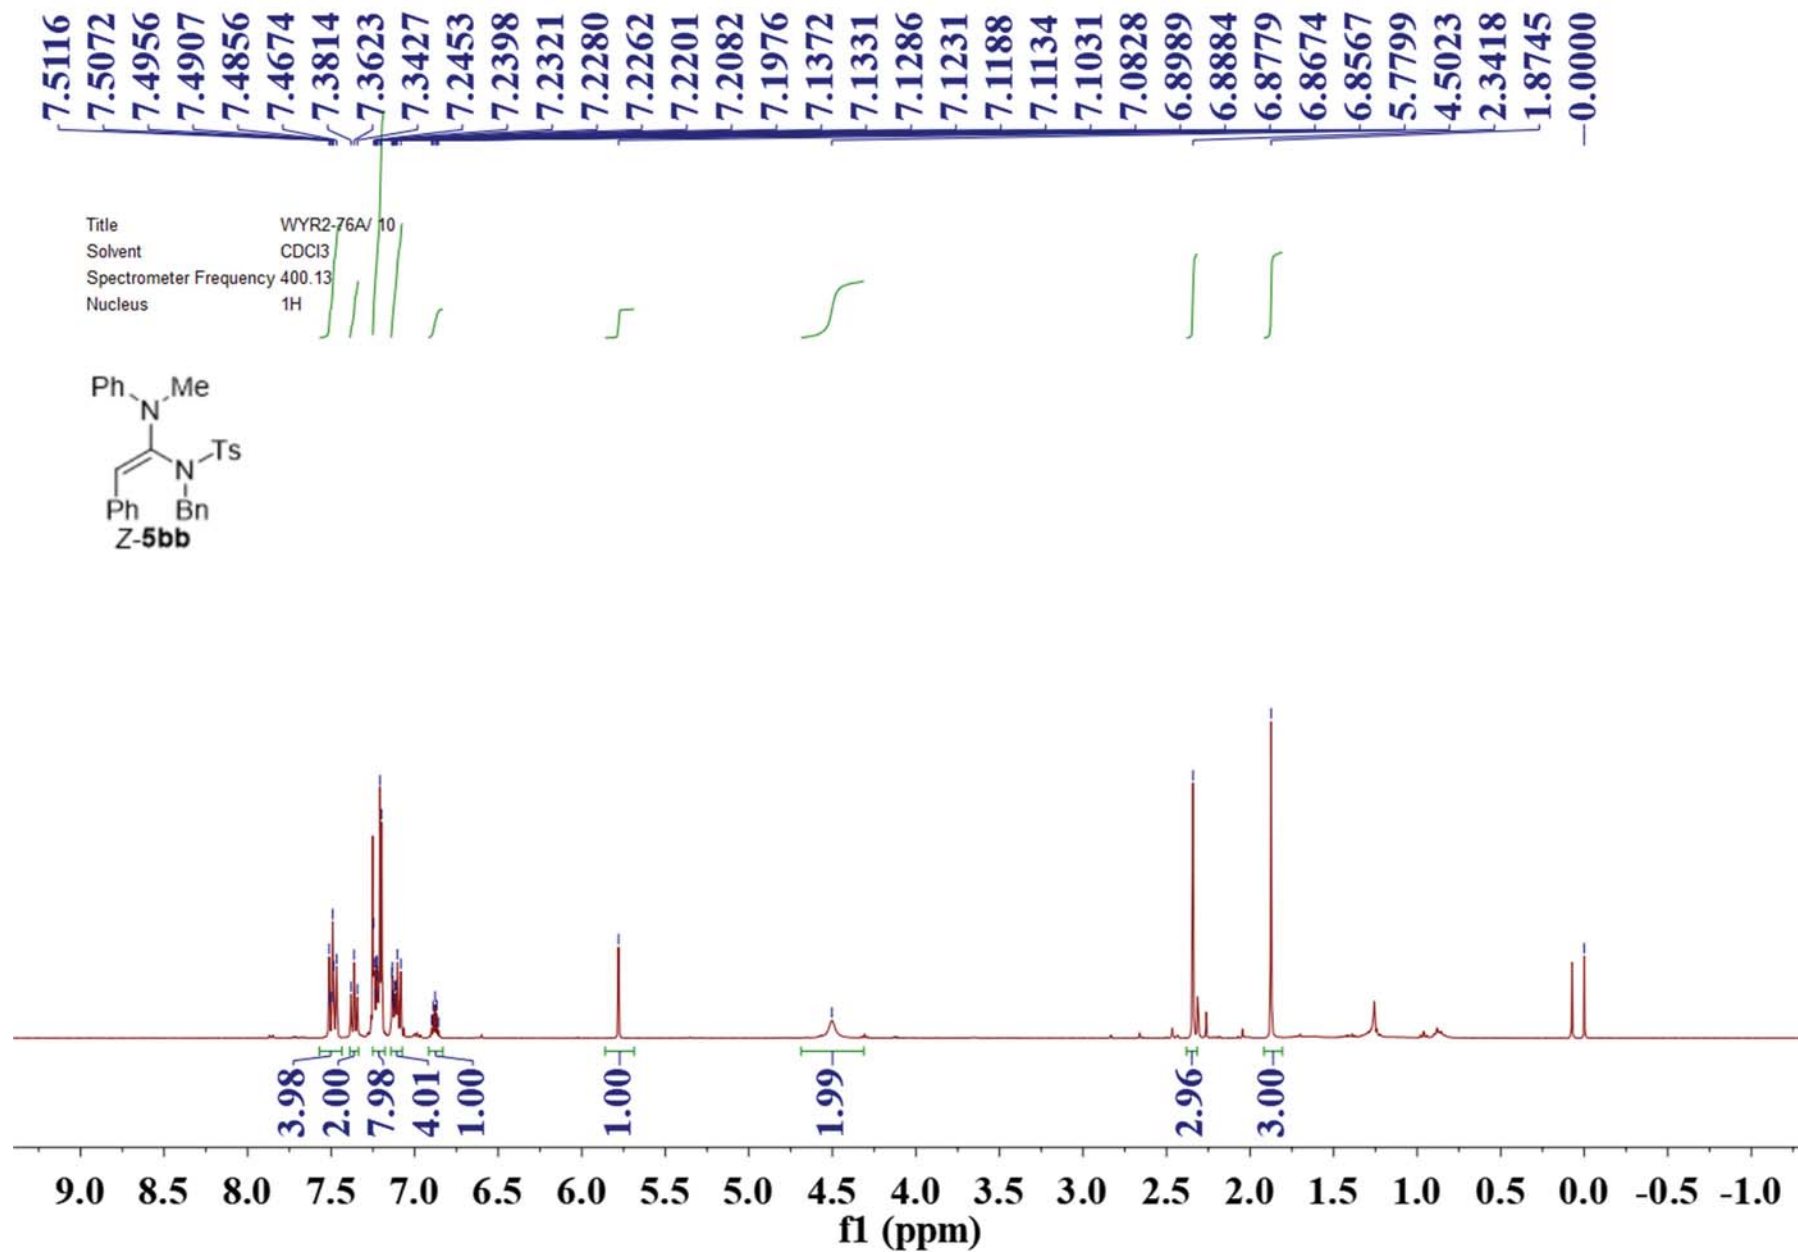



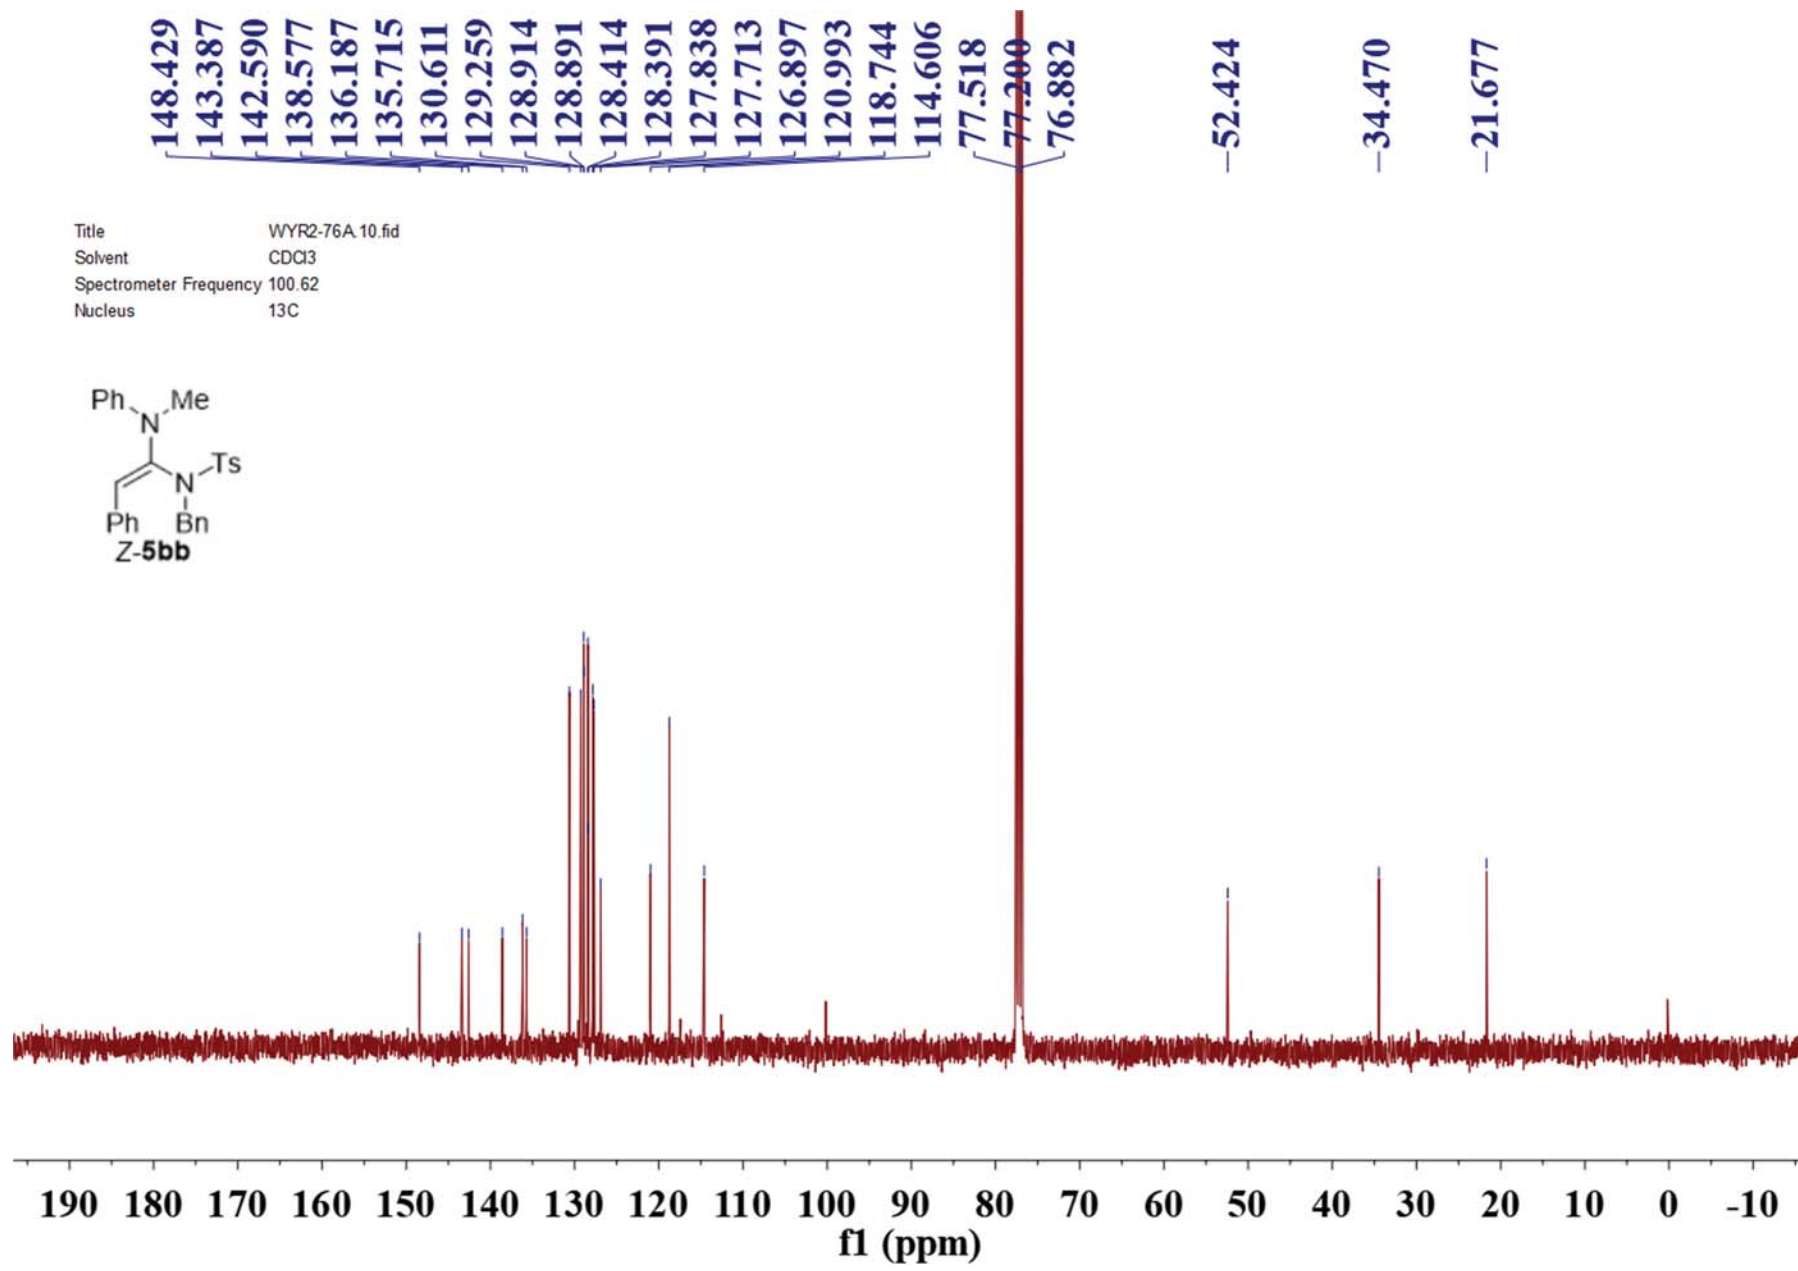

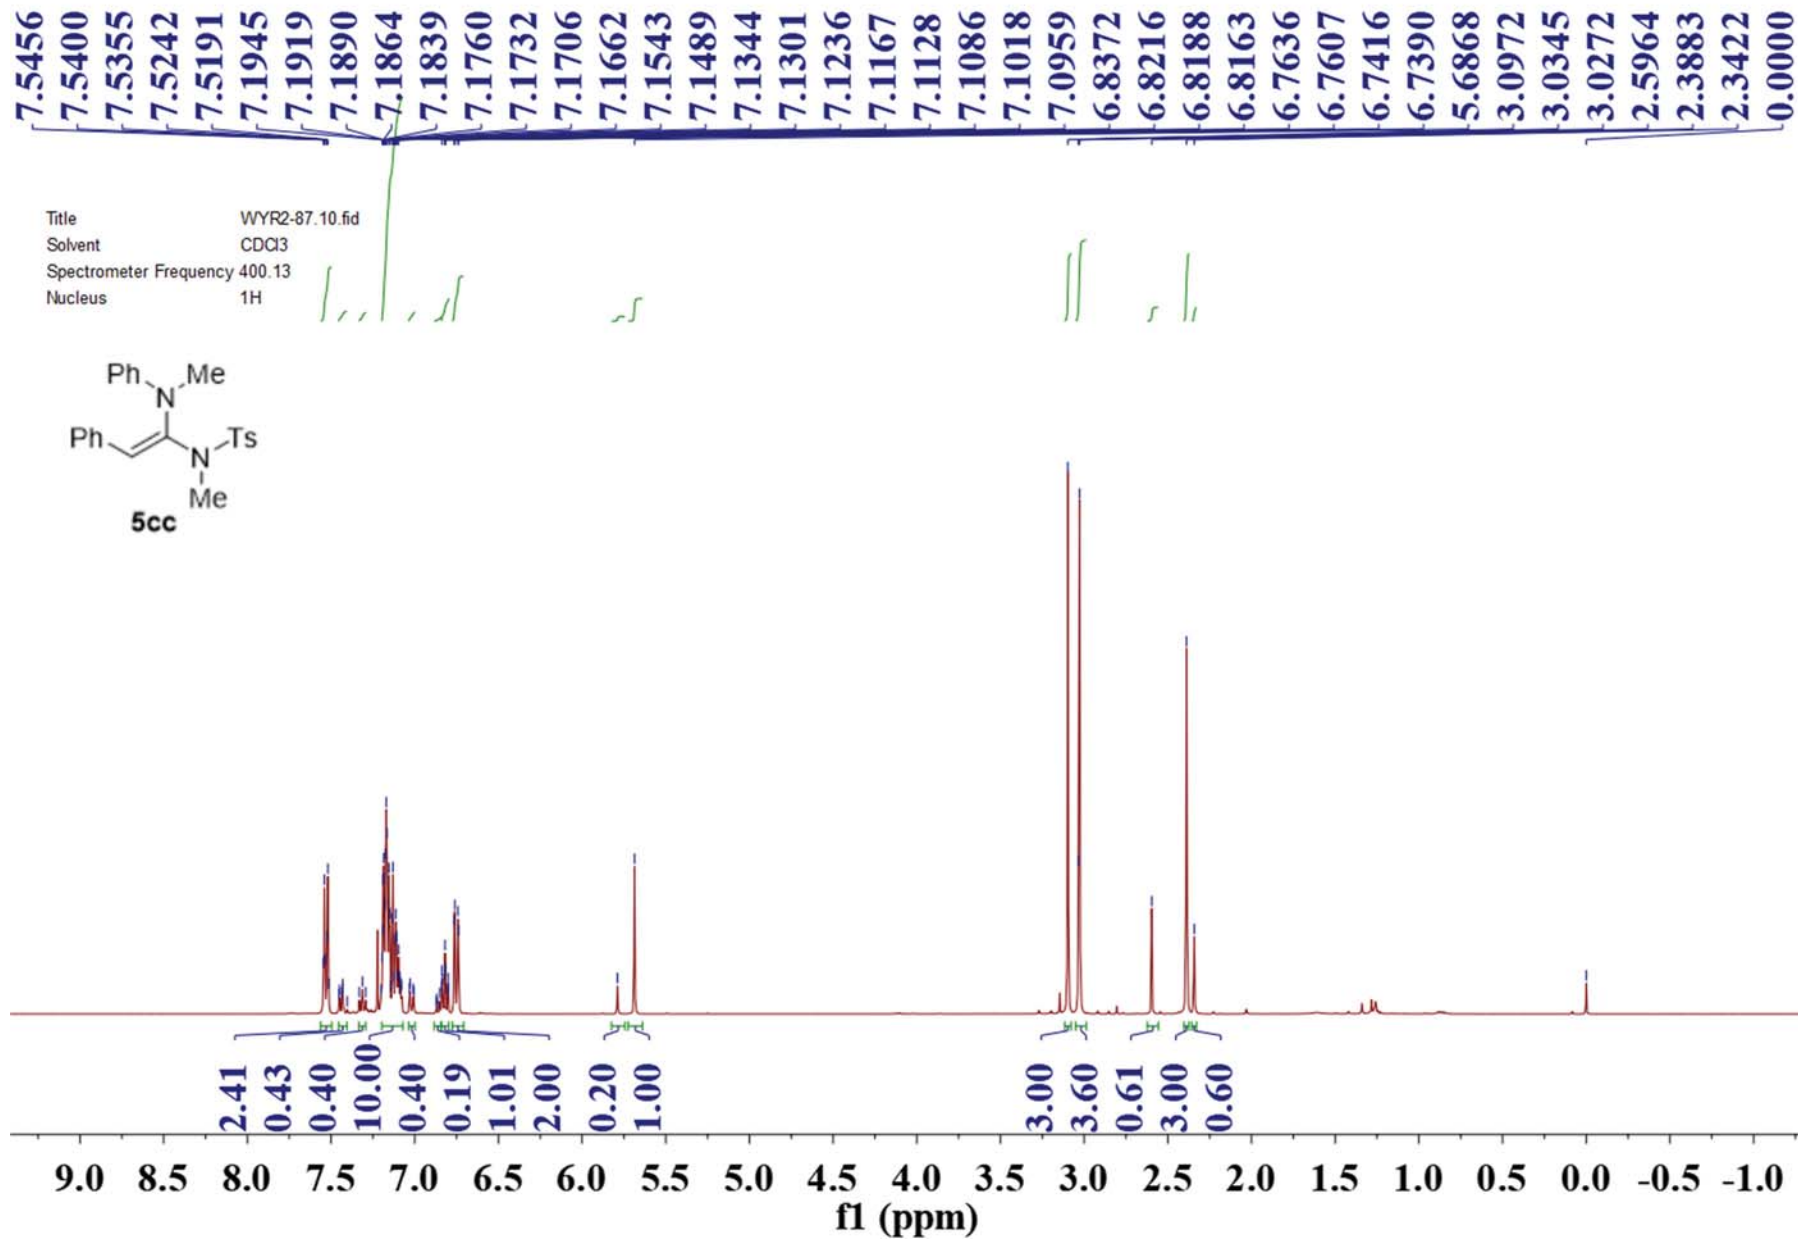

145.564  
 143.635  
 141.568  
 135.418  
 135.017  
 129.445  
 129.409  
 129.315  
 128.913  
 128.860  
 128.661  
 128.473  
 127.822  
 127.529  
 127.354  
 127.186  
 126.969  
 126.785  
 120.575  
 119.695  
 117.880  
 116.001  
 115.189  
 115.028  
 77.518  
 77.200  
 36.882  
 36.417  
 37.994  
 37.978  
 36.985  
 21.668  
 21.612

Title WYR2-87.10.fid  
 Solvent CDCl3  
 Spectrometer Frequency 100.62  
 Nucleus 13C

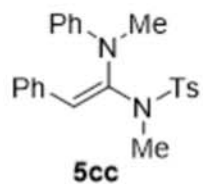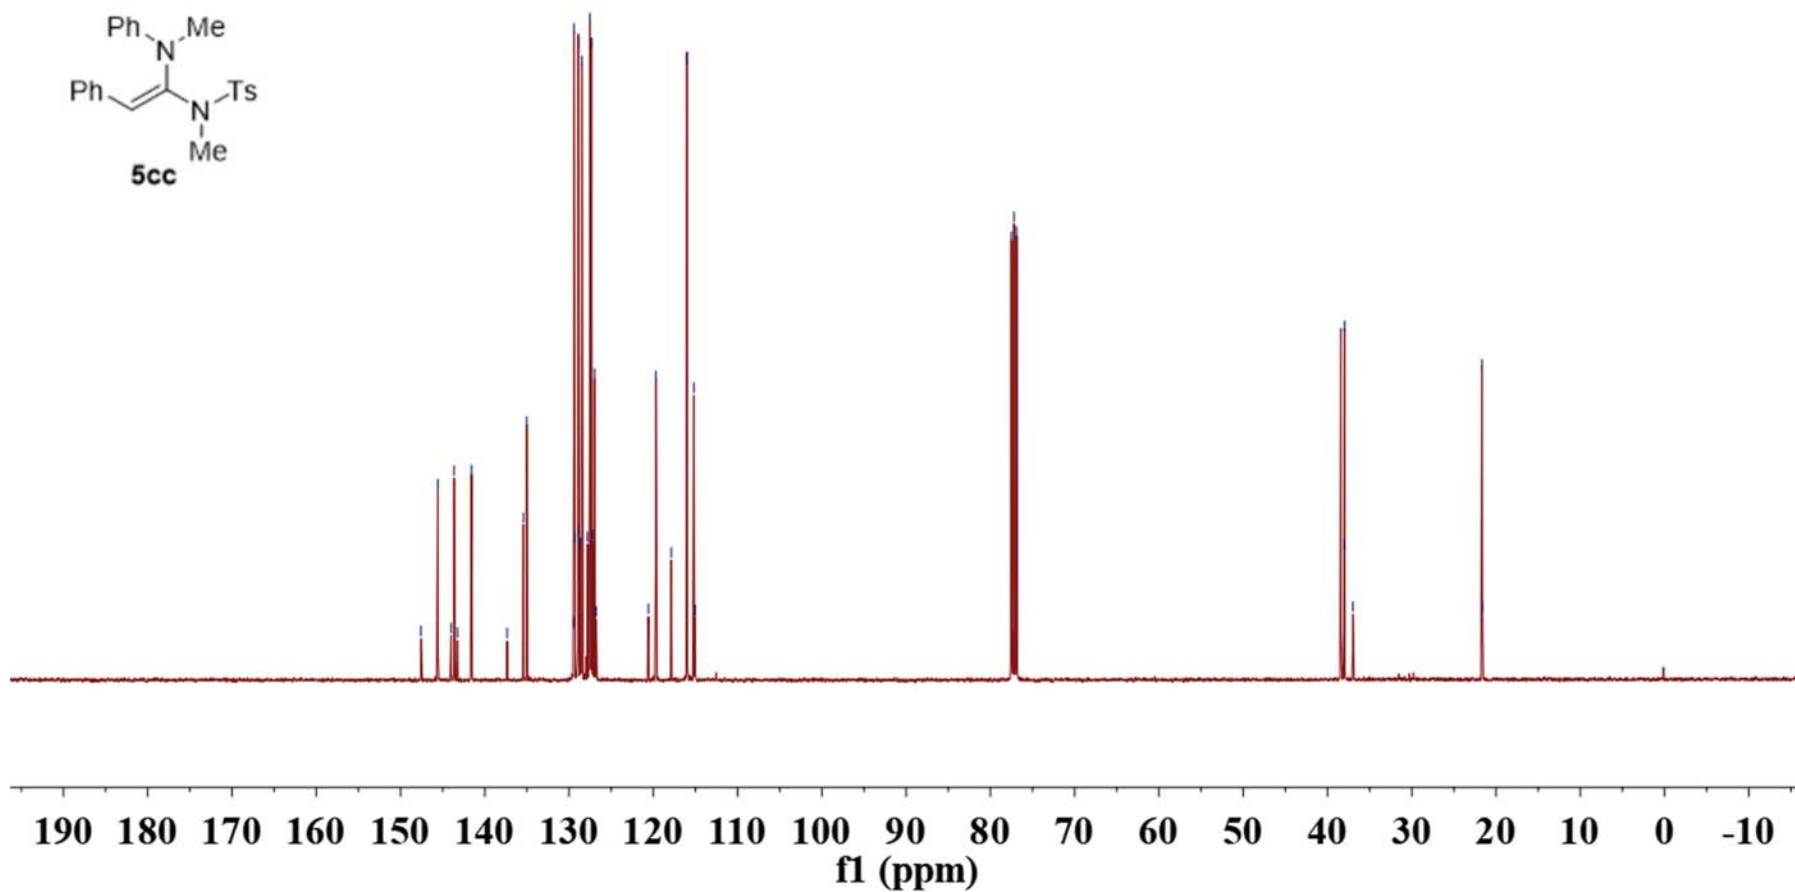

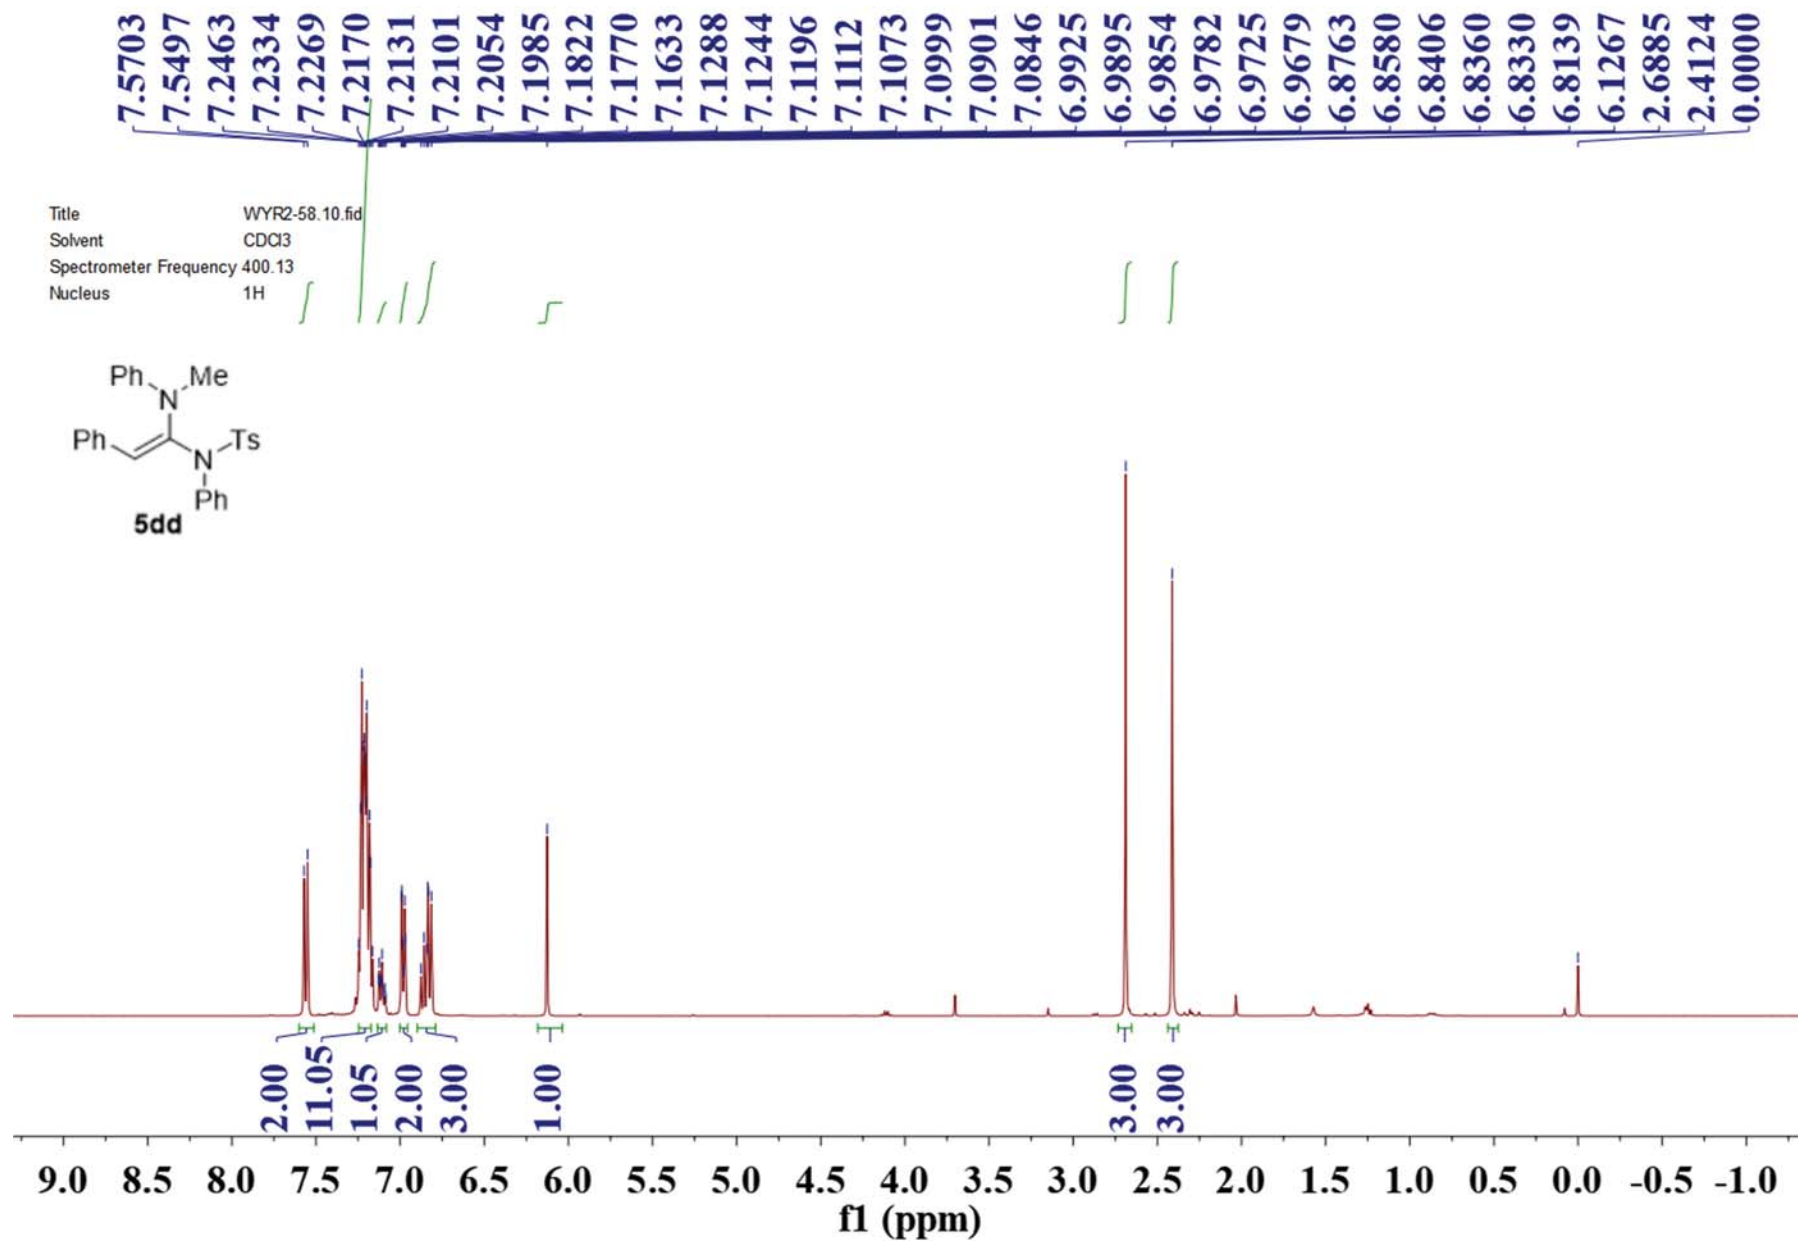

145.043  
 143.877  
 140.458  
 138.539  
 137.282  
 134.983  
 129.870  
 129.490  
 128.826  
 128.731  
 128.512  
 128.227  
 127.632  
 127.028  
 120.041  
 116.508  
 114.870  
 77.518  
 77.200  
 76.882  
 -38.926  
 -21.745

Title WYR2-58.10.fid  
 Solvent CDCl3  
 Spectrometer Frequency 100.62  
 Nucleus 13C

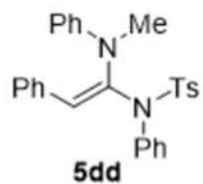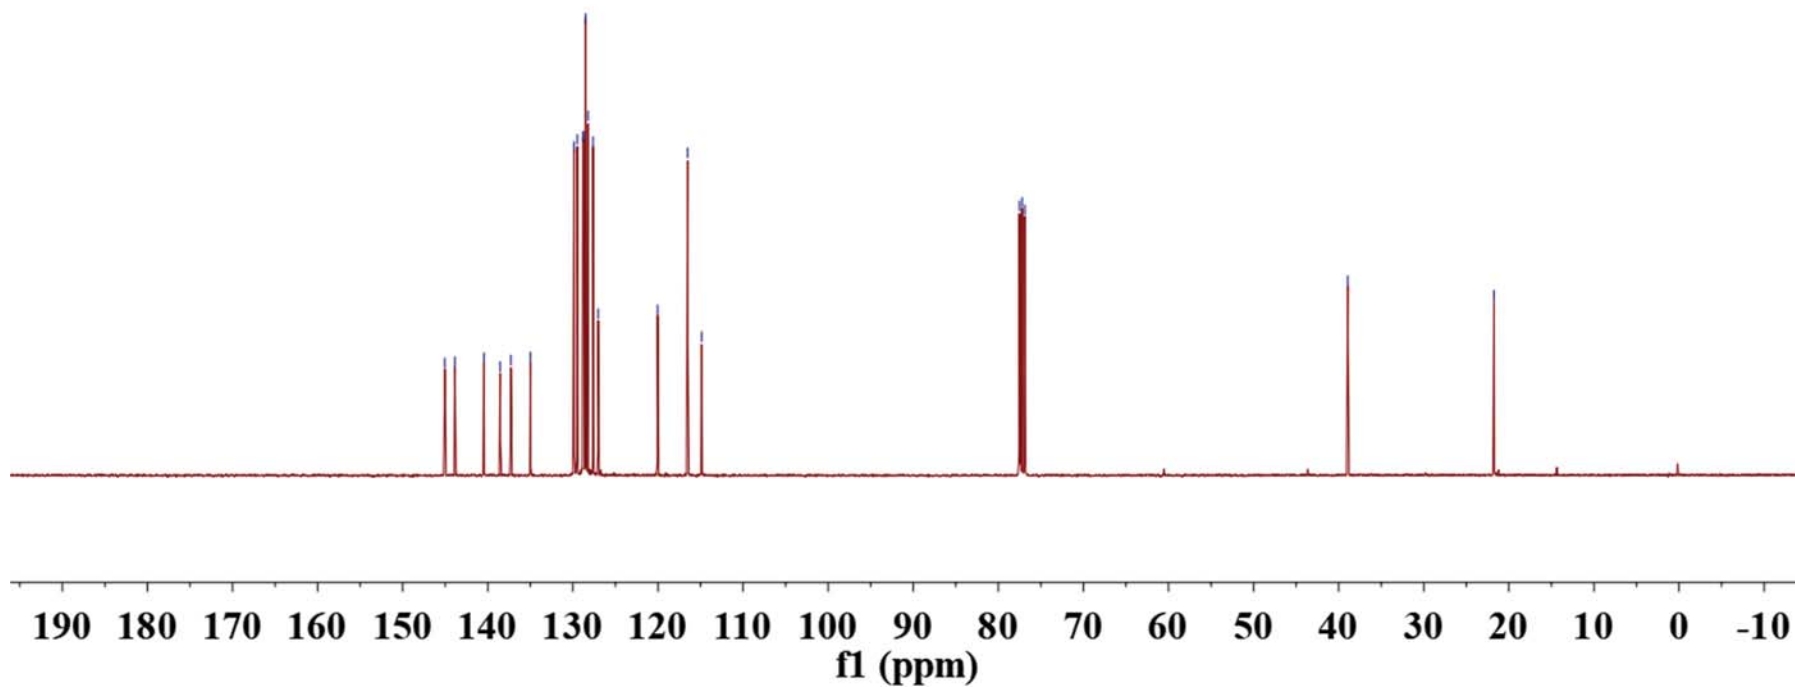

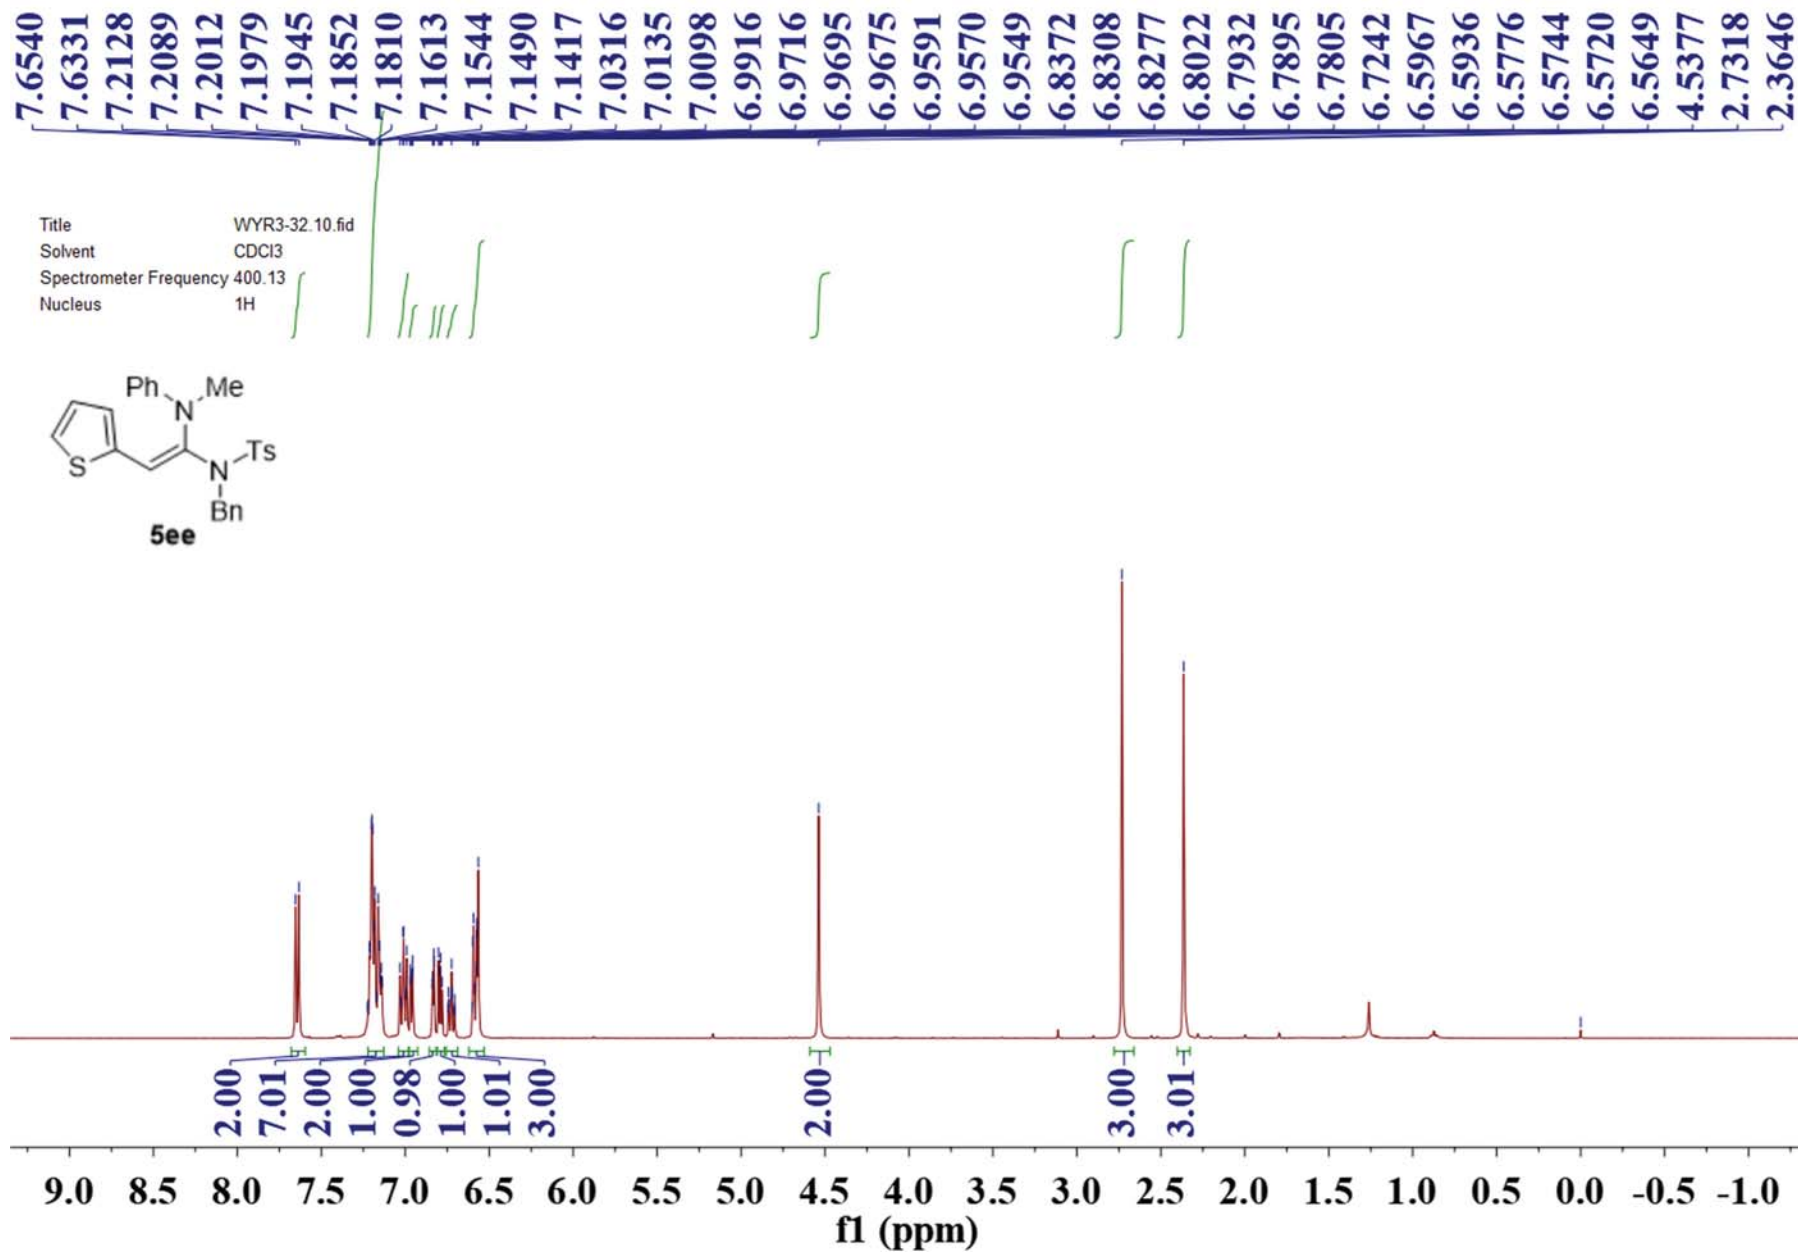

144.828  
 143.858  
 137.127  
 136.803  
 134.579  
 129.574  
 128.841  
 128.401  
 127.908  
 127.795  
 127.463  
 127.241  
 126.256  
 125.887  
 119.560  
 114.673  
 114.399  
 77.518  
 77.200  
 76.881  
 -51.173  
 -36.237  
 -21.599

Title WYR3-32.10.fid  
 Solvent CDCl3  
 Spectrometer Frequency 100.62  
 Nucleus 13C

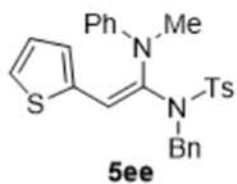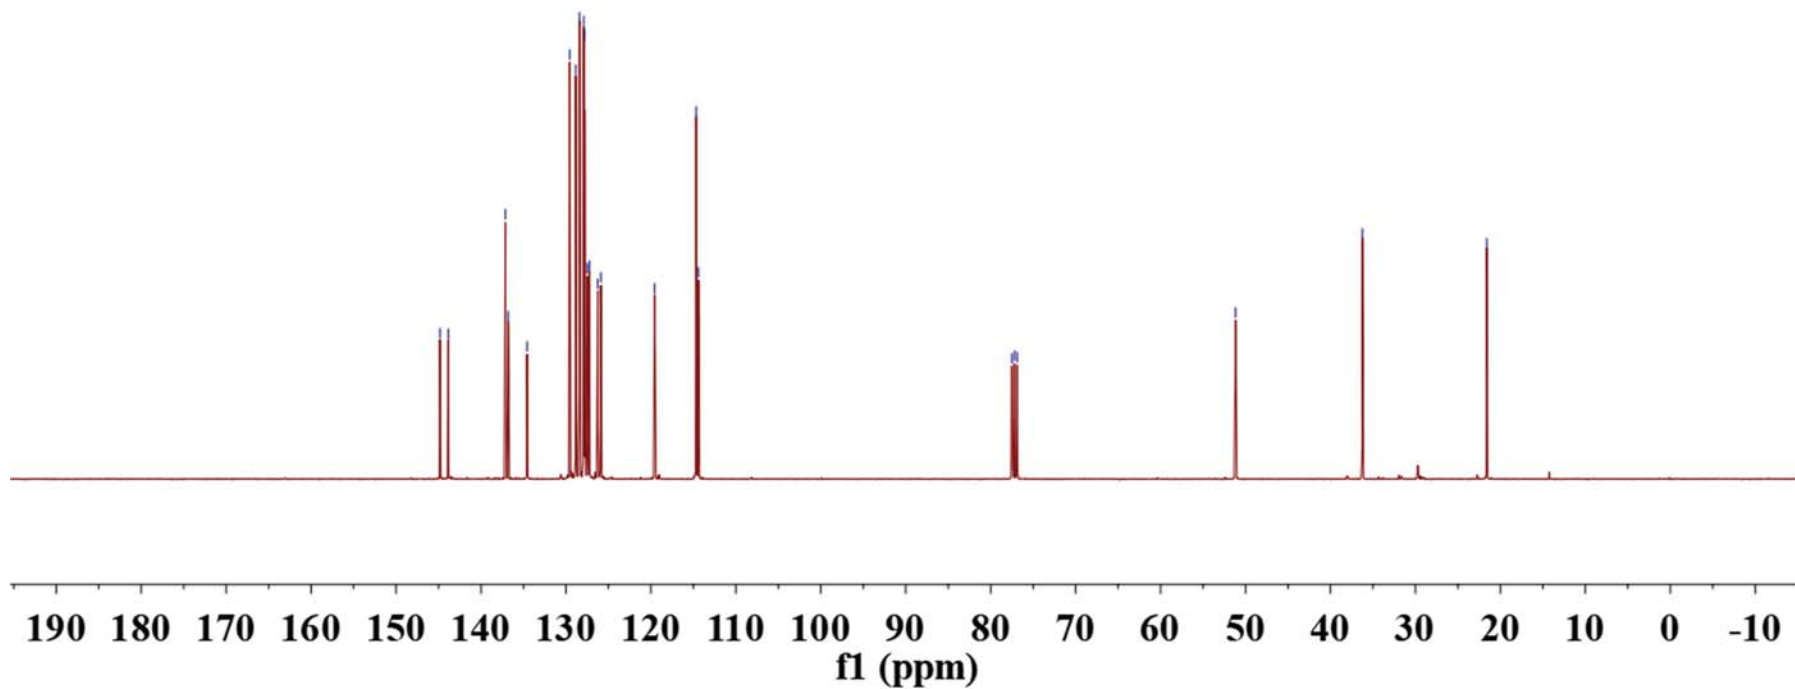

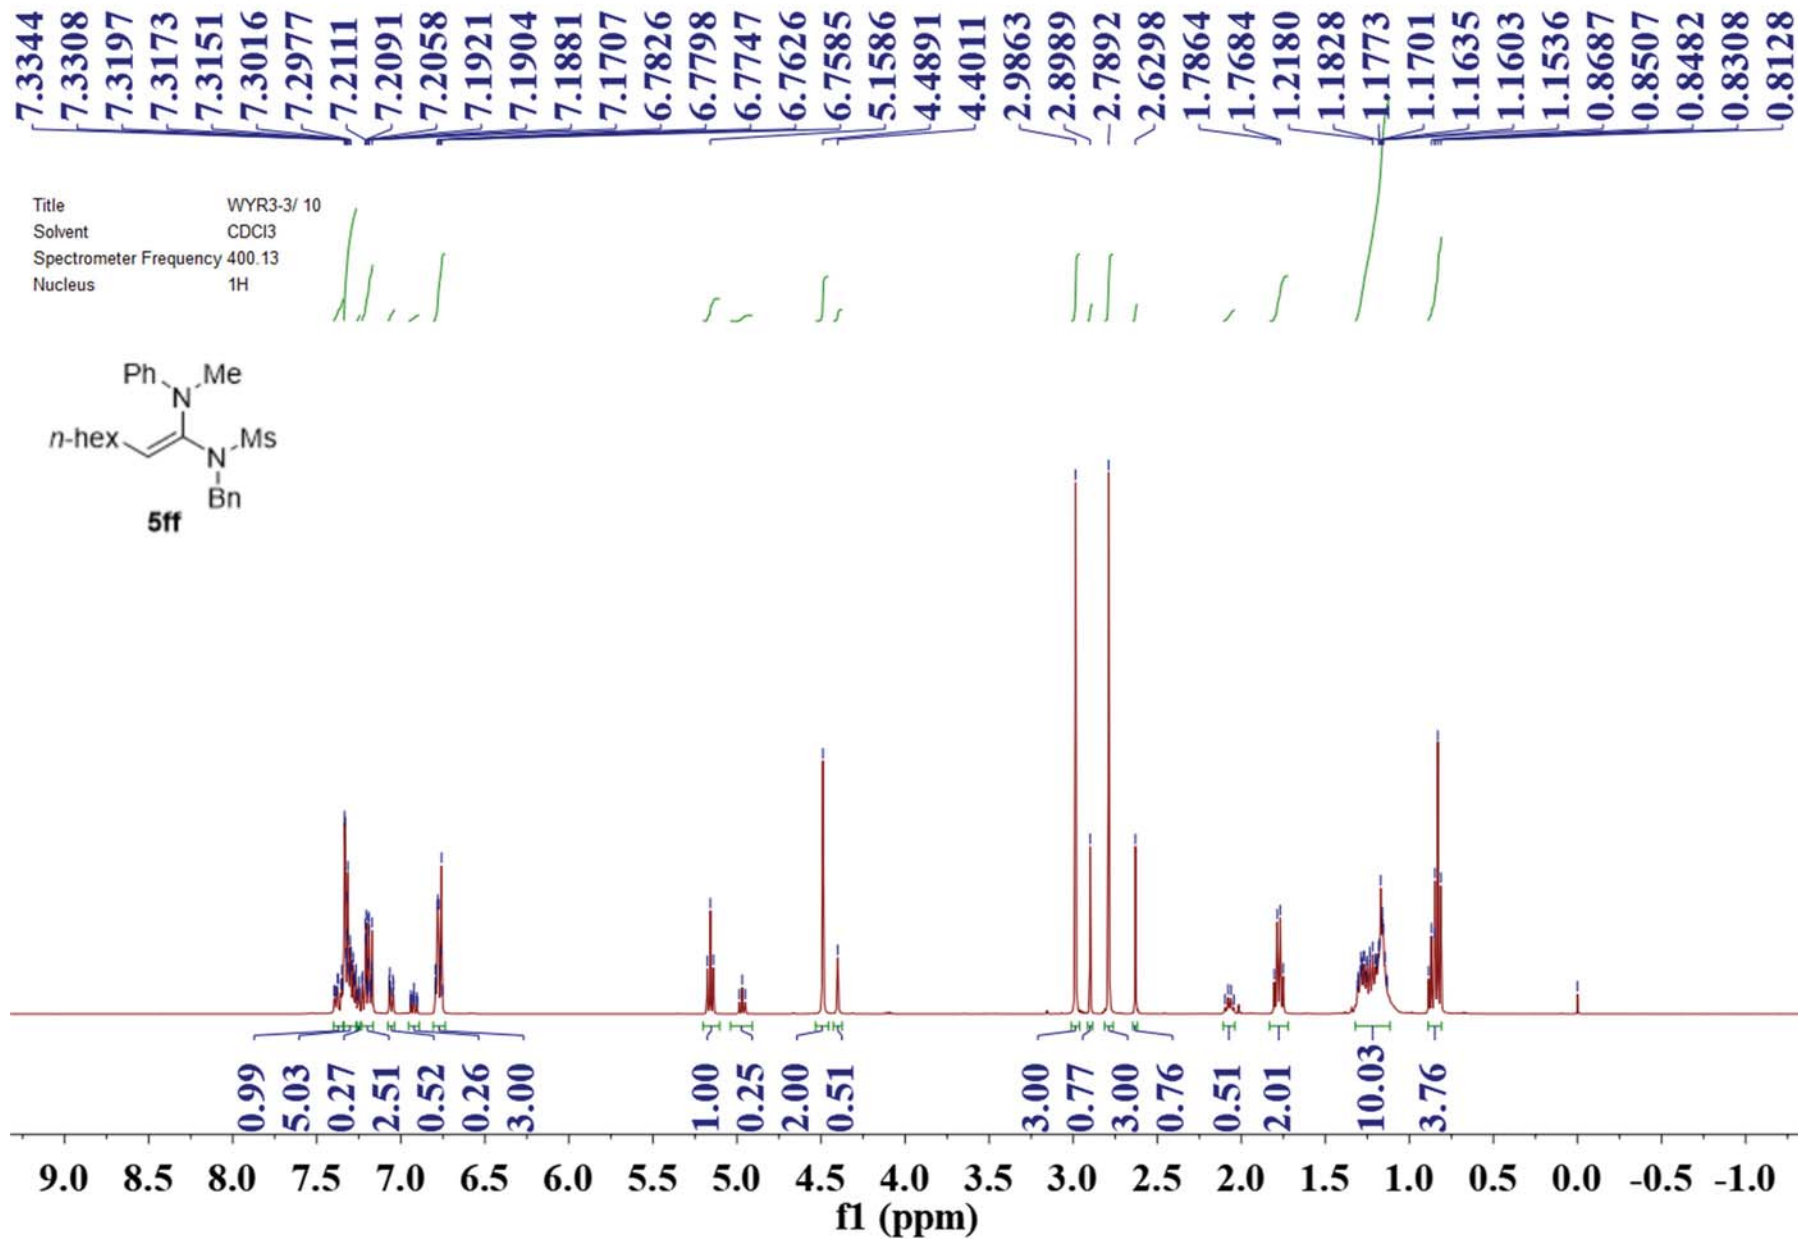



148.394  
 146.550  
 137.435  
 136.794  
 135.971  
 129.259  
 129.078  
 129.037  
 128.567  
 128.441  
 128.373  
 128.047  
 127.753  
 121.649  
 121.510  
 120.780  
 120.133  
 118.732  
 114.247  
 77.519  
 77.200  
 76.881  
 51.378  
 51.314  
 41.646  
 40.289  
 39.656  
 36.606  
 31.766  
 31.531  
 29.197  
 29.139  
 28.829  
 28.726  
 28.433  
 27.463  
 22.650  
 22.559  
 14.145  
 14.109

Title WYR3-3.10.fid  
 Solvent CDCl3  
 Spectrometer Frequency 100.62  
 Nucleus 13C

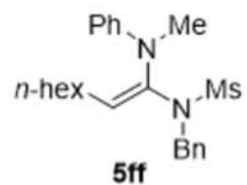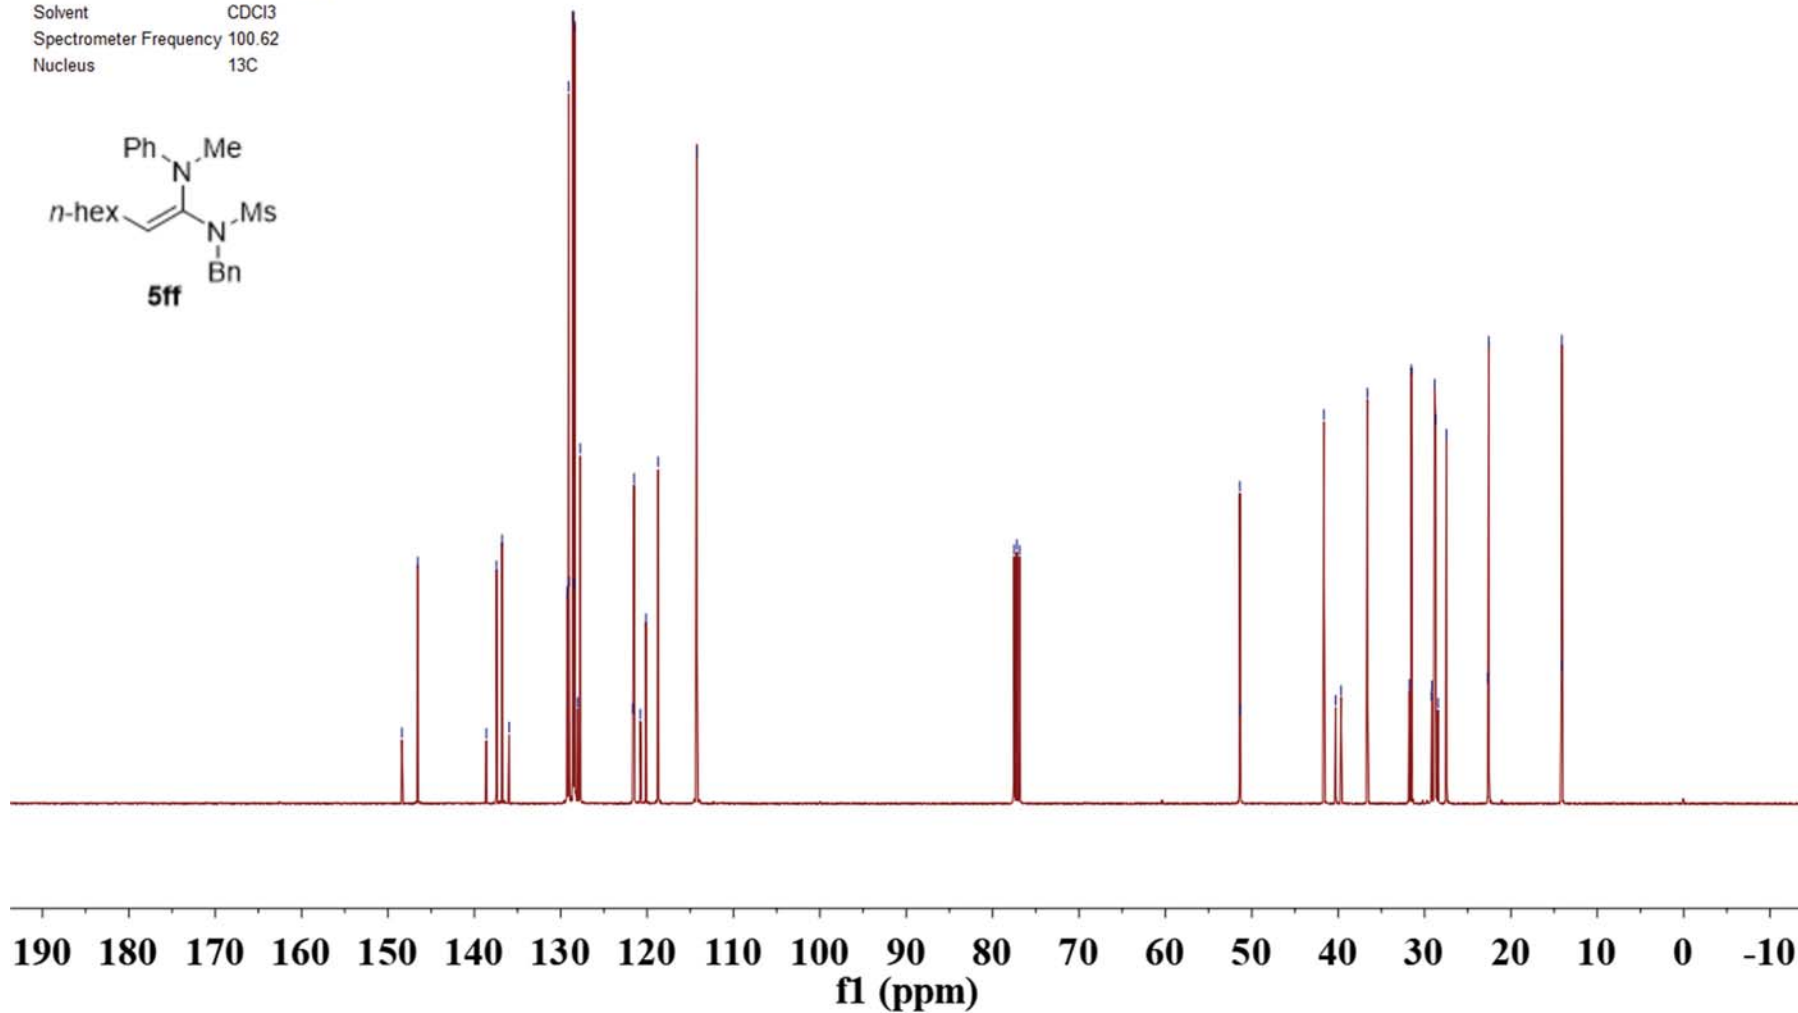

Title WYR2-81.10.fid  
Solvent CDCl3  
Spectrometer Frequency 400.13  
Nucleus 1H

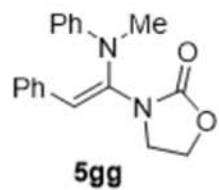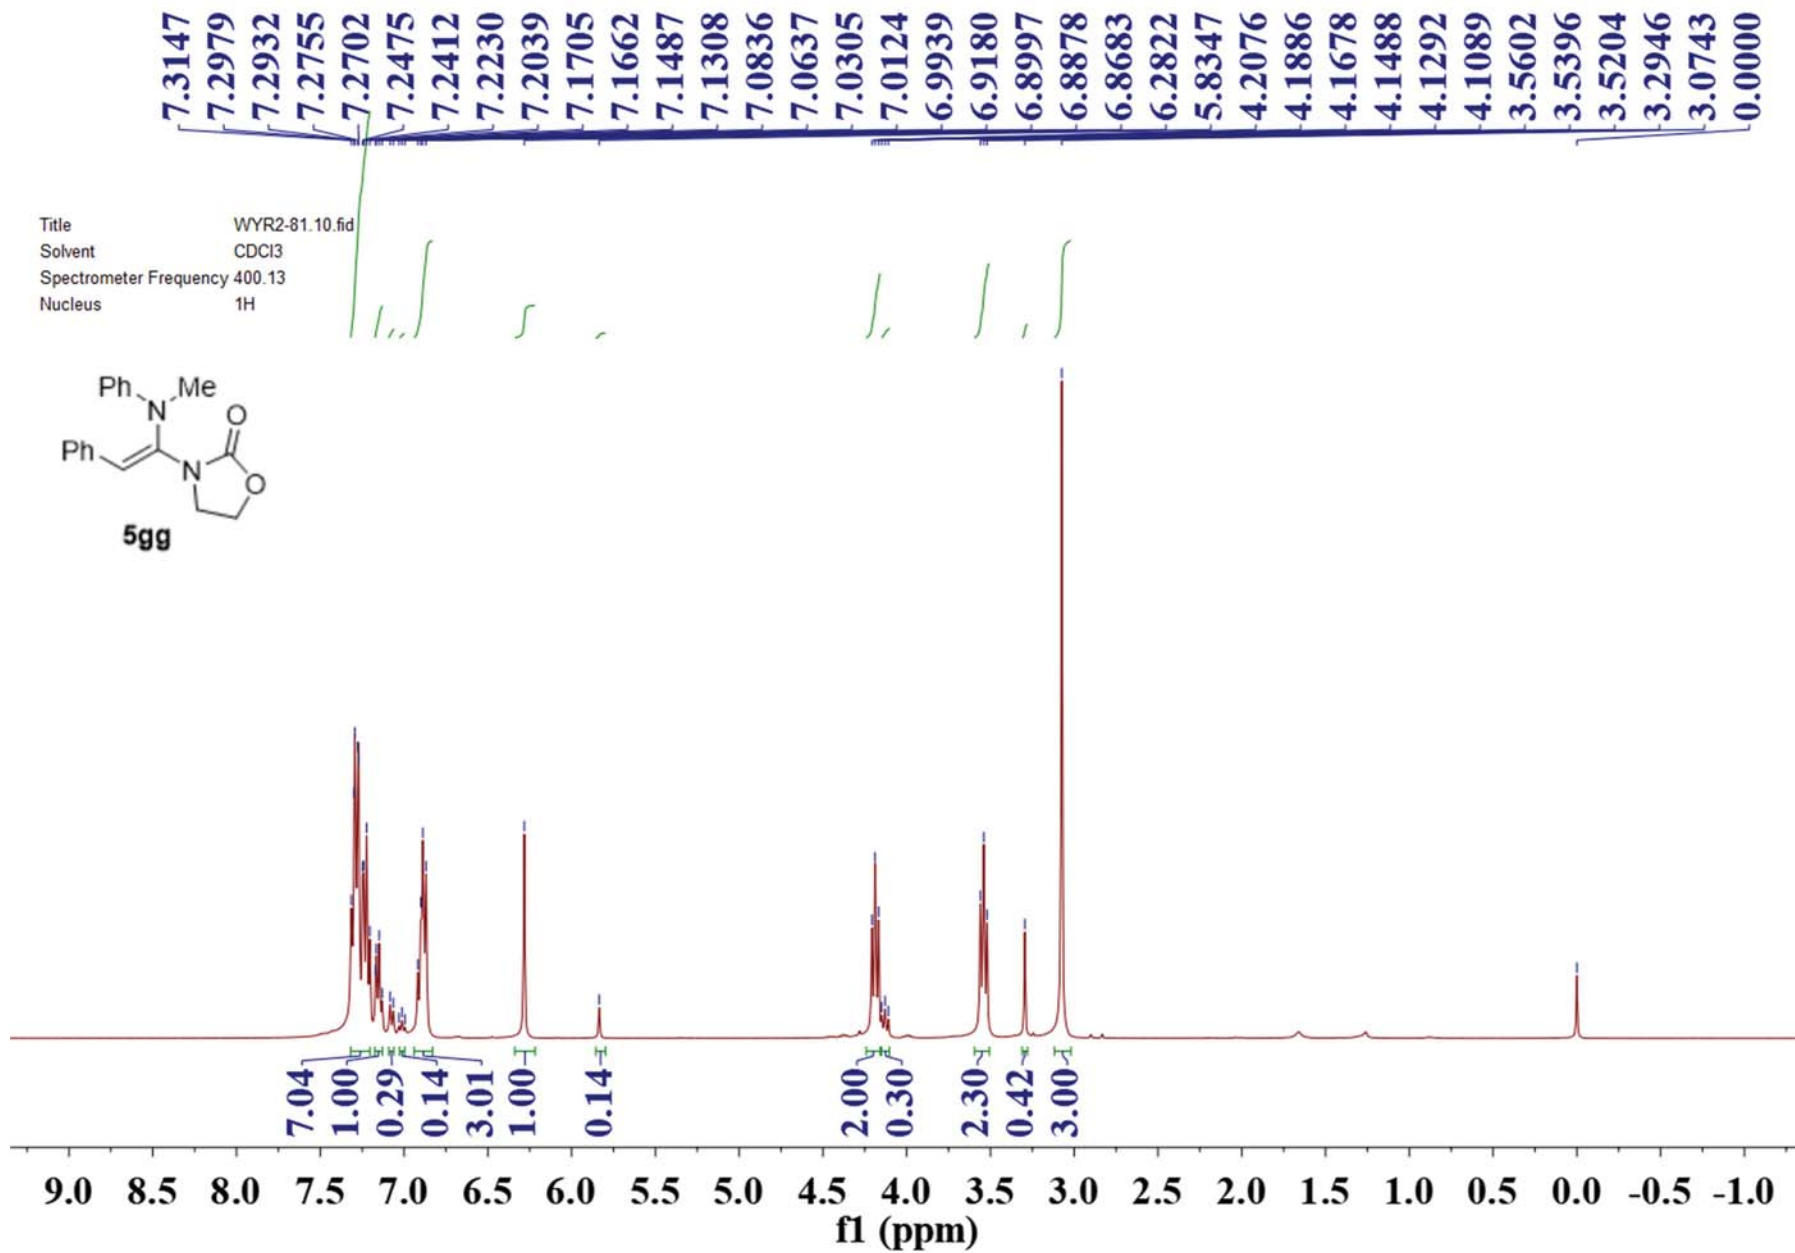

156.333  
 146.265  
 145.073  
 136.105  
 135.858  
 134.673  
 129.613  
 129.376  
 128.665  
 128.563  
 127.729  
 127.241  
 127.124  
 126.227  
 122.822  
 120.894  
 119.844  
 115.542  
 114.483  
 109.761  
 77.518  
 77.200  
 76.882  
 62.215  
 61.581  
 44.776  
 44.267  
 40.825  
 38.175

Title WYR2-81/ 10  
 Solvent CDCl3  
 Spectrometer Frequency 100.62  
 Nucleus 13C

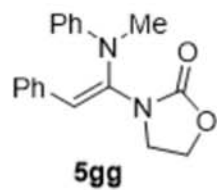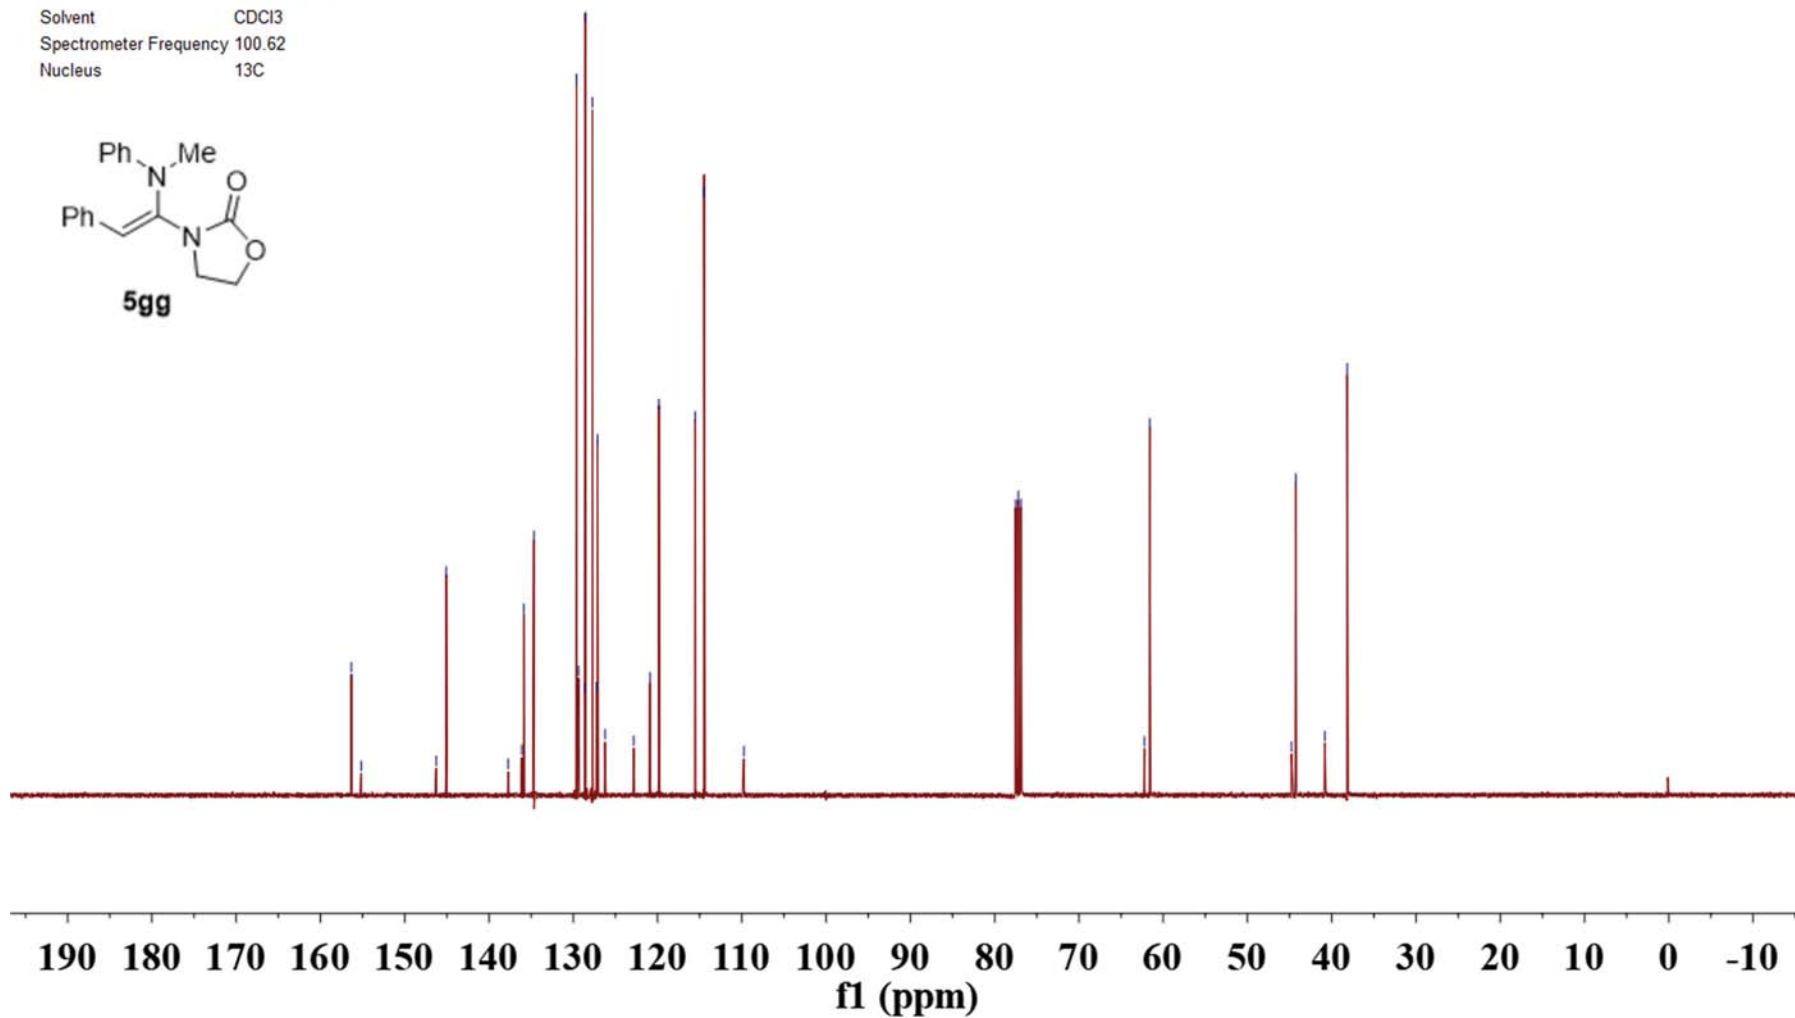

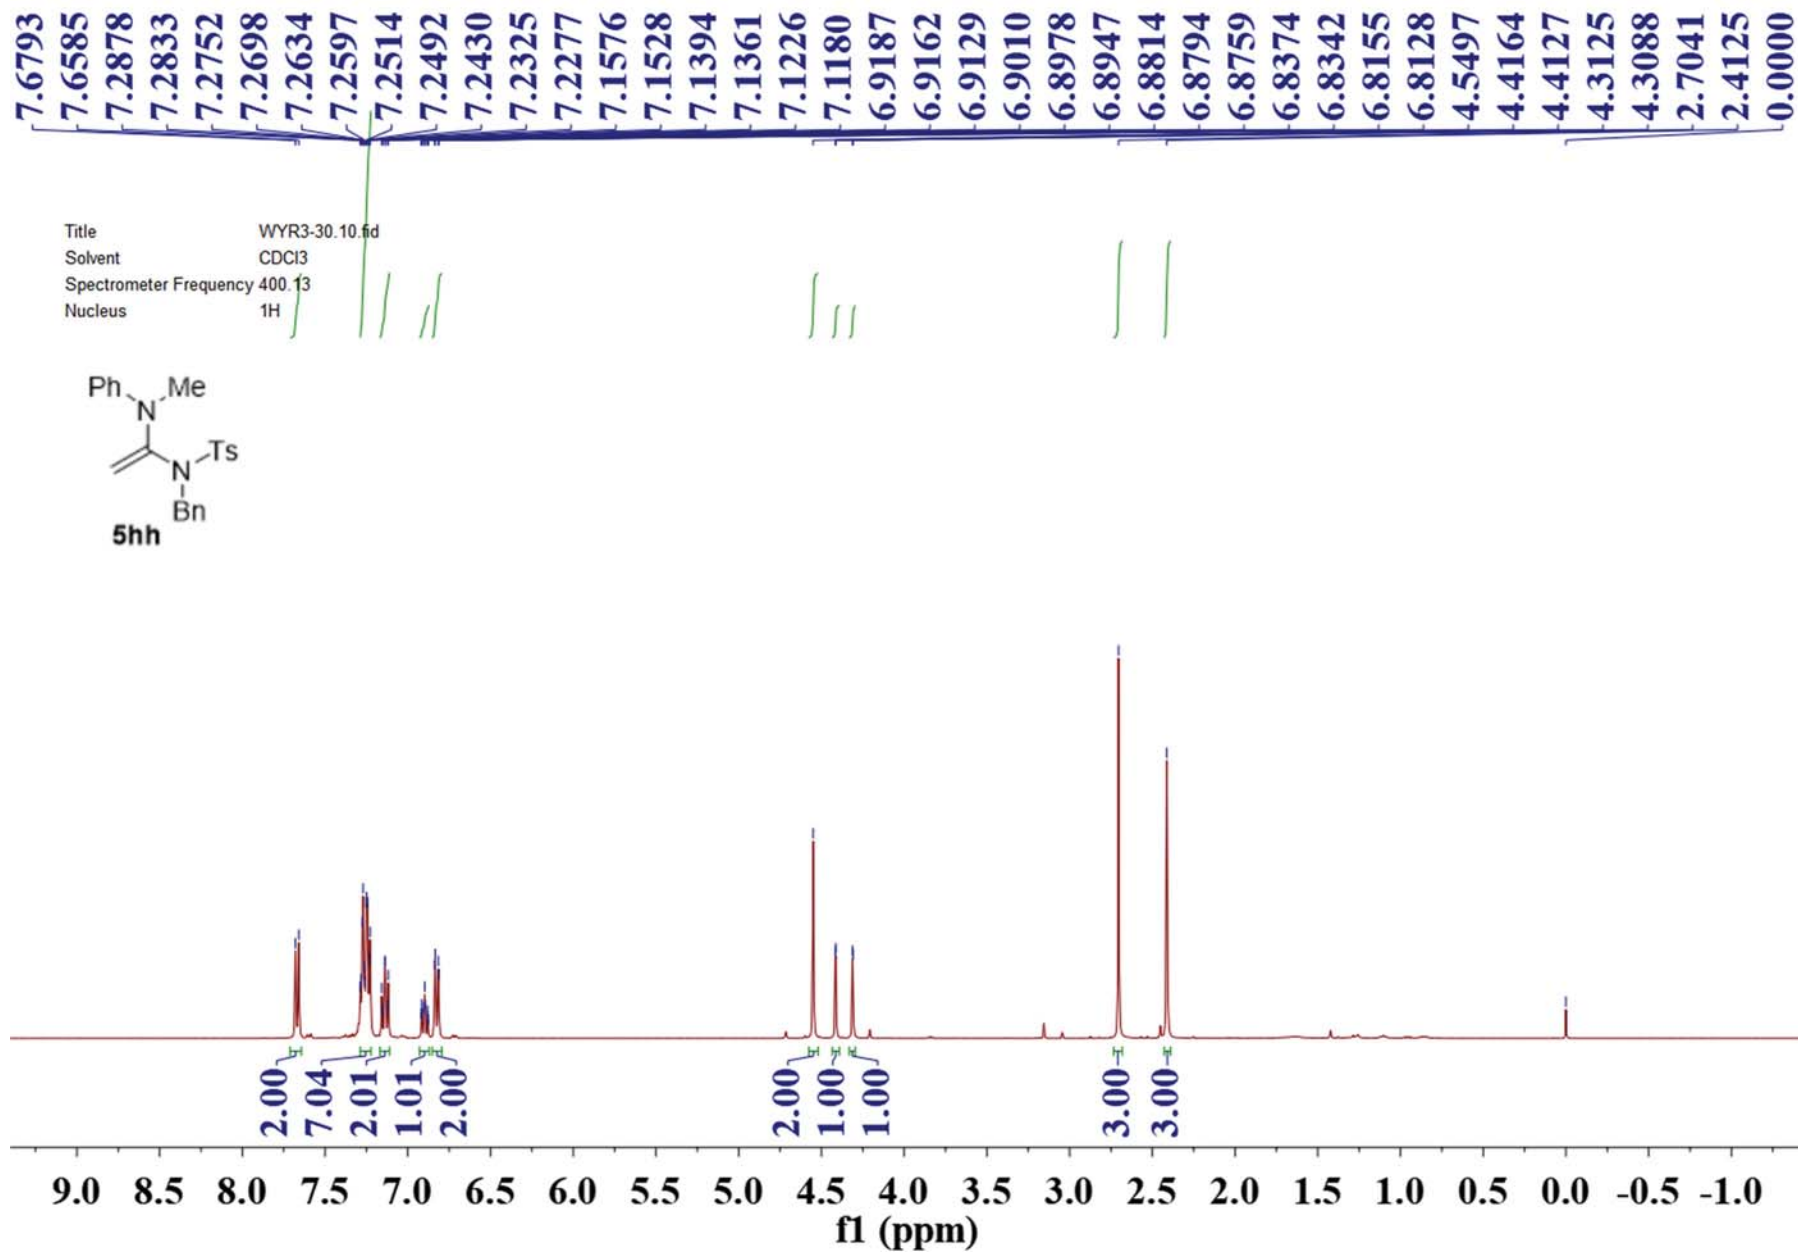

Title WYR3-30.11.fid  
Solvent CDCl3  
Spectrometer Frequency 100.62  
Nucleus 13C

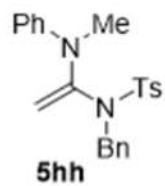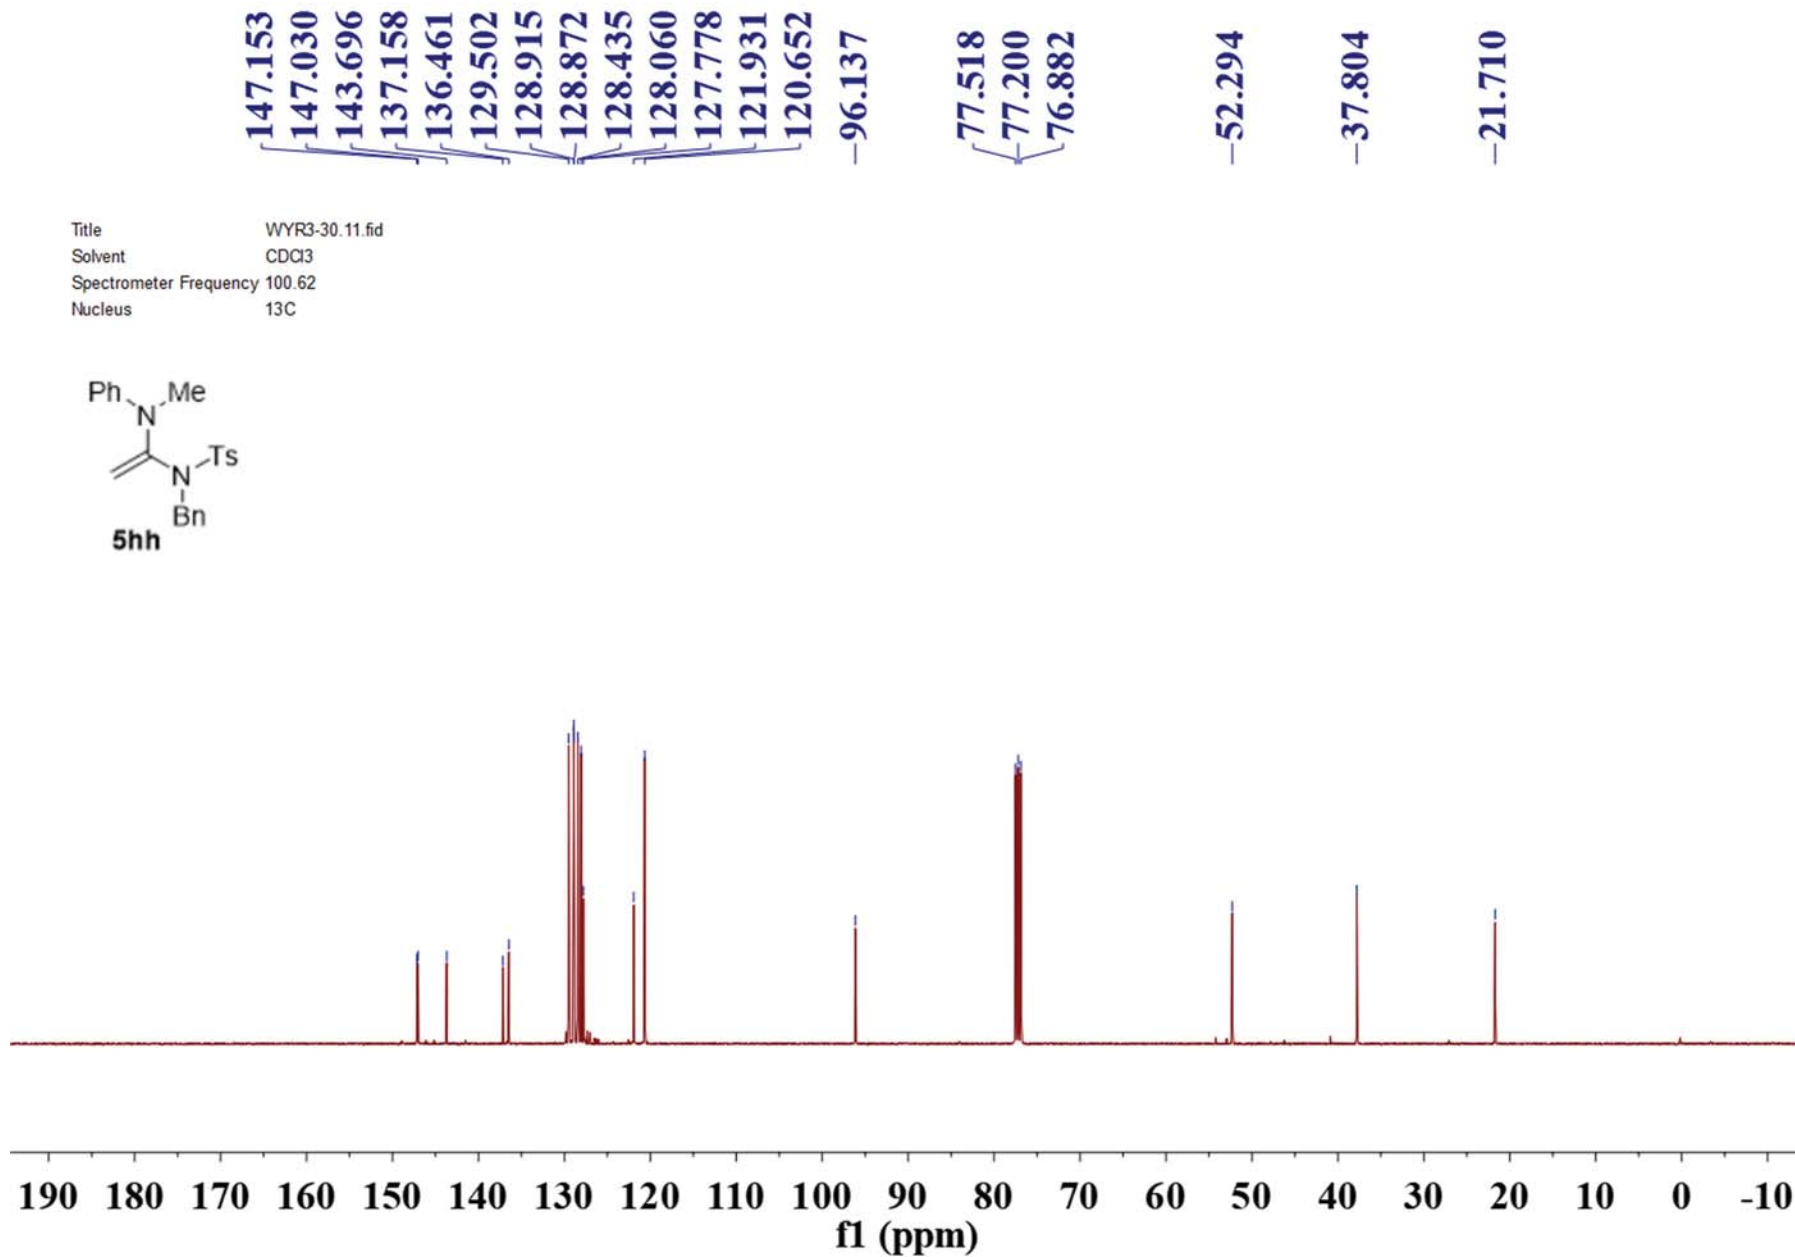

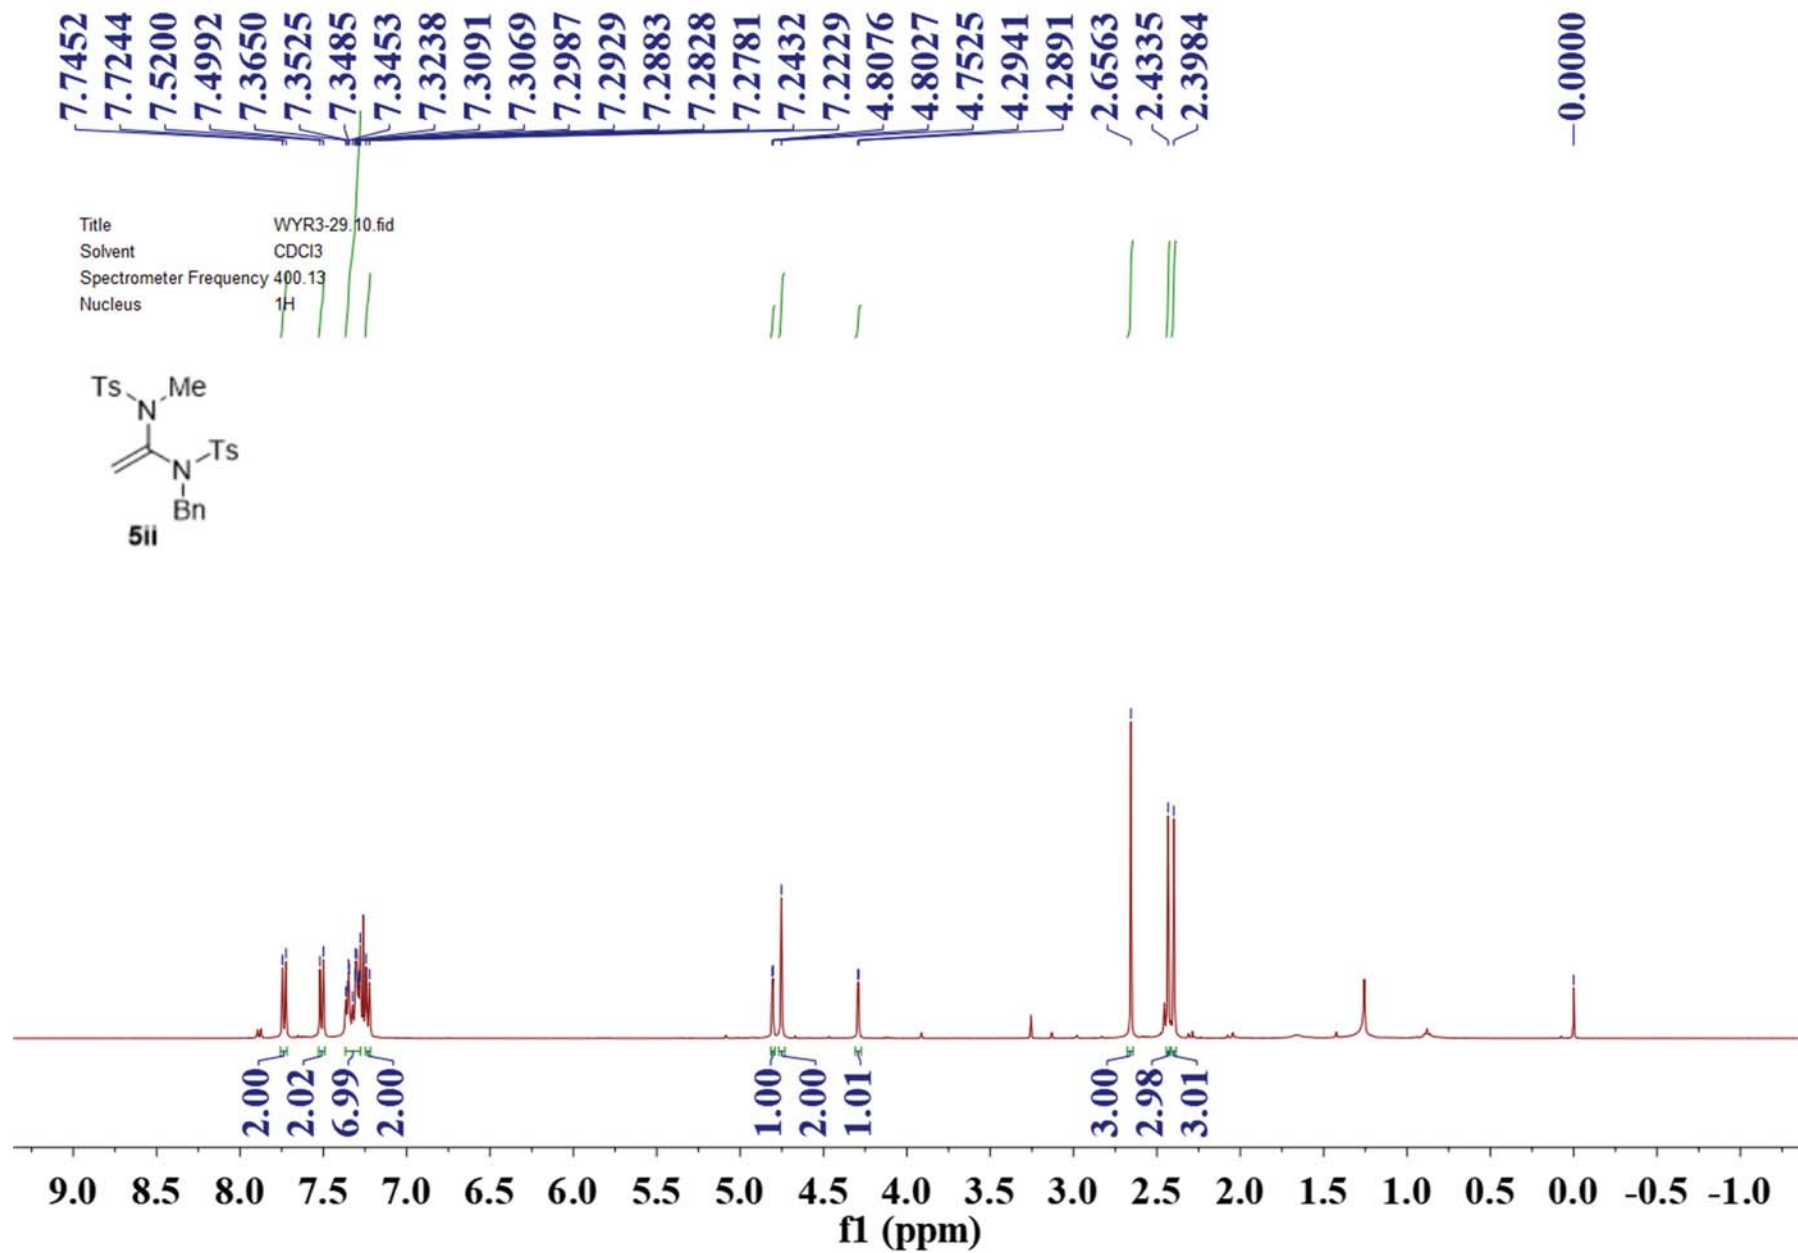

144.172  
 144.018  
 141.563  
 136.706  
 136.594  
 133.276  
 129.528  
 129.486  
 128.872  
 128.586  
 128.361  
 127.787  
 -107.322

77.518  
 77.200  
 76.882

-52.077

-37.697

21.778  
 21.731

Title WYR3-29.11.fid  
 Solvent CDCl3  
 Spectrometer Frequency 100.62  
 Nucleus 13C

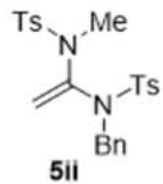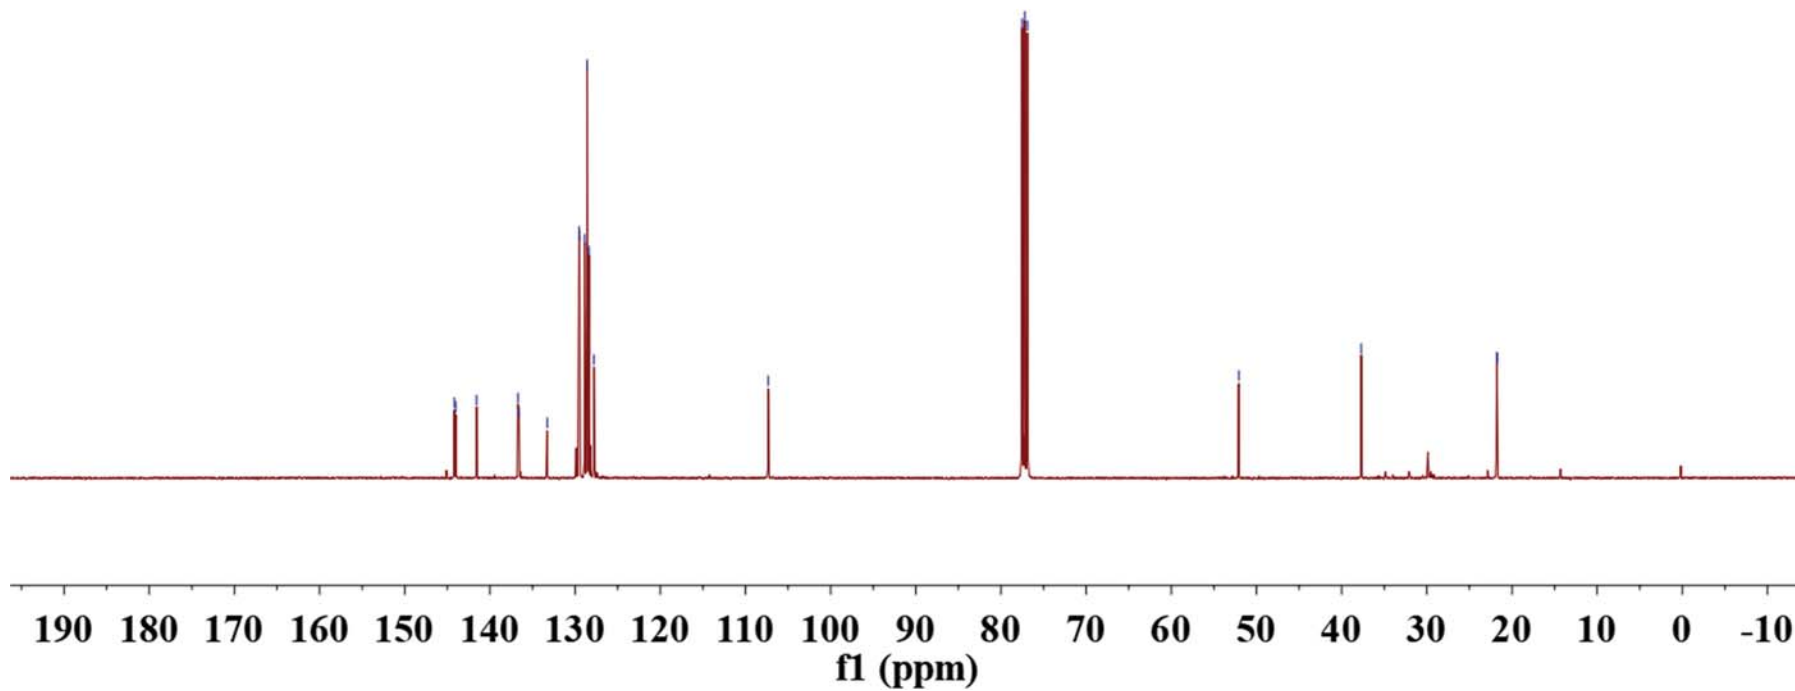

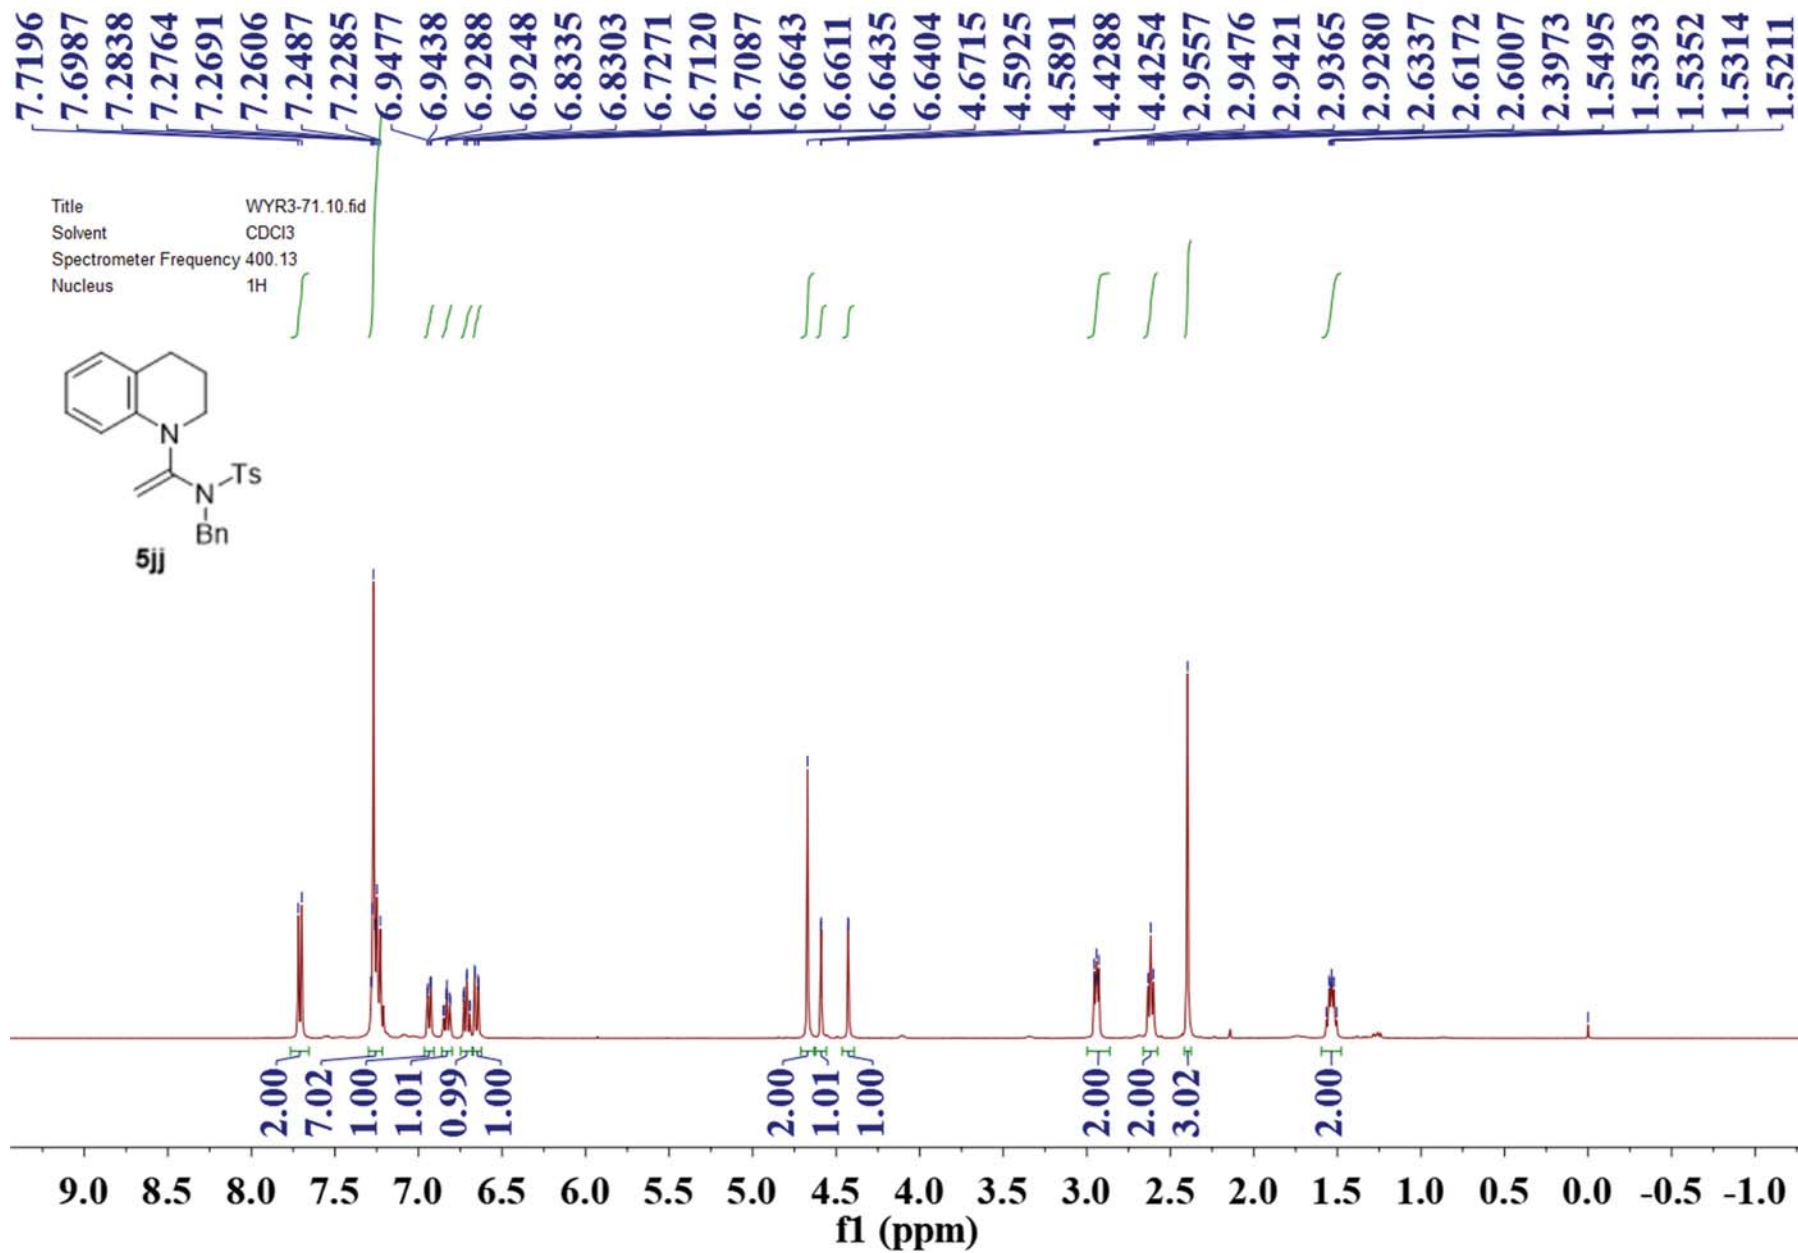



146.729  
 143.645  
 142.697  
 137.393  
 136.753  
 129.472  
 129.359  
 128.729  
 128.419  
 127.912  
 127.645  
 126.740  
 126.074  
 120.380  
 120.114  
 -98.447  
  
 77.518  
 77.200  
 76.882  
  
 -51.755  
 -46.392  
  
 27.422  
 21.638  
 21.028

Title WYR3-71/ 10  
 Solvent CDCl3  
 Spectrometer Frequency 100.62  
 Nucleus 13C

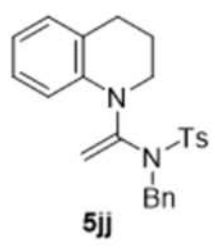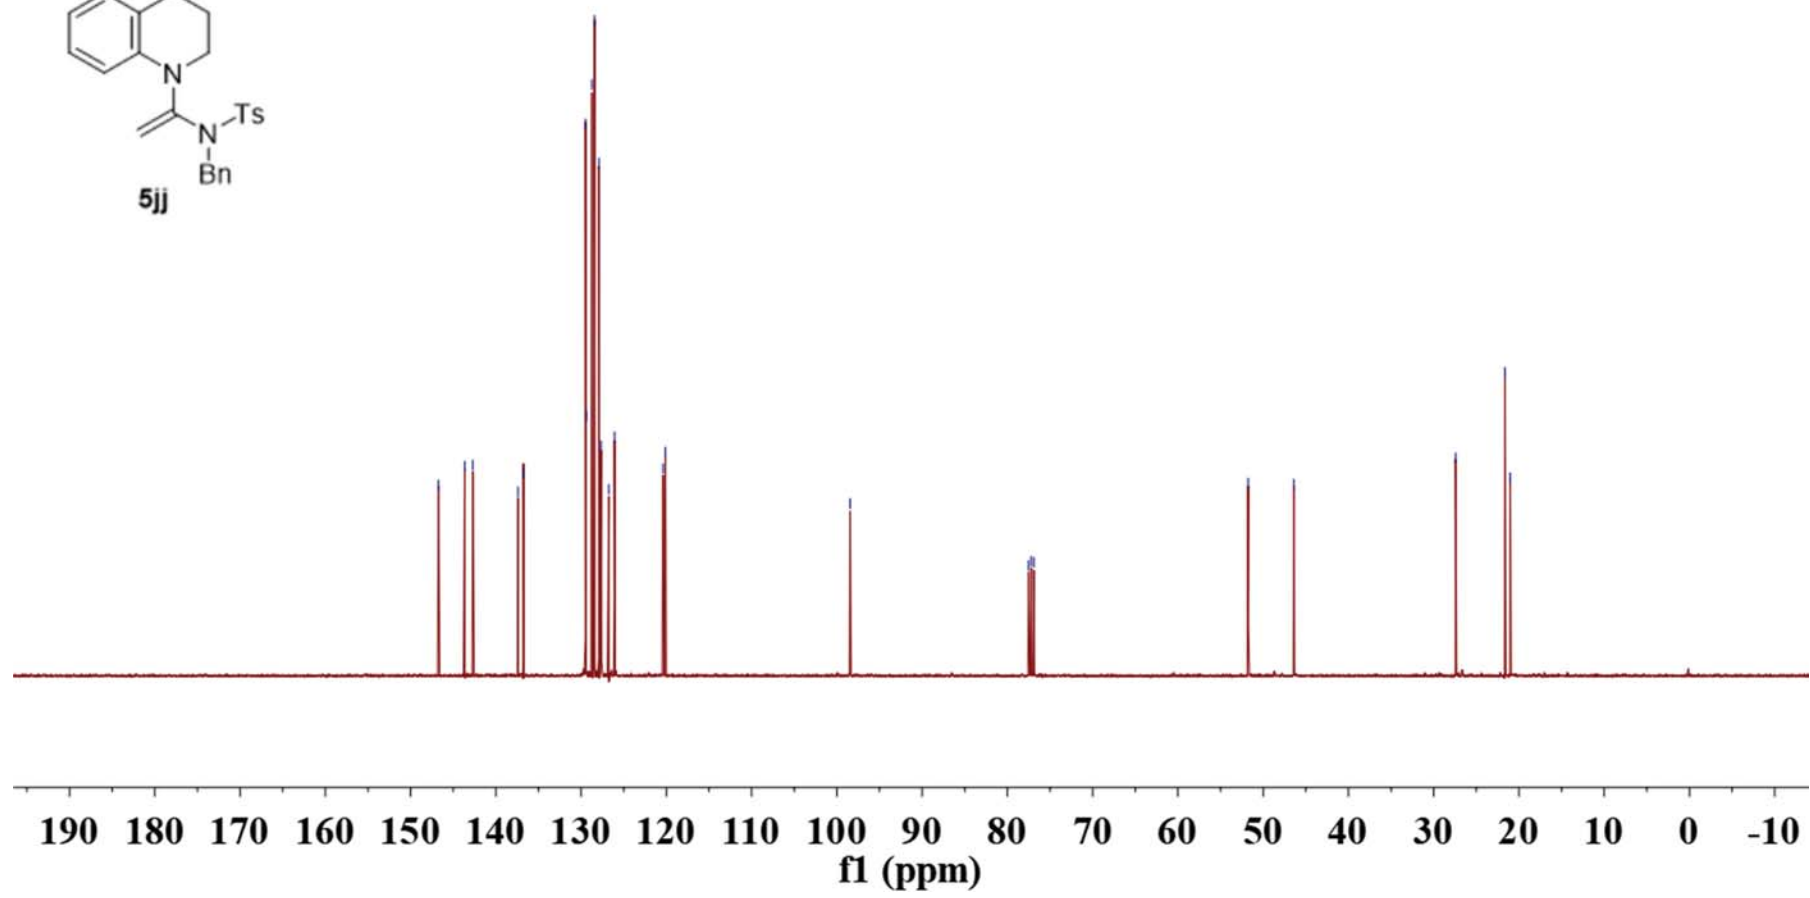

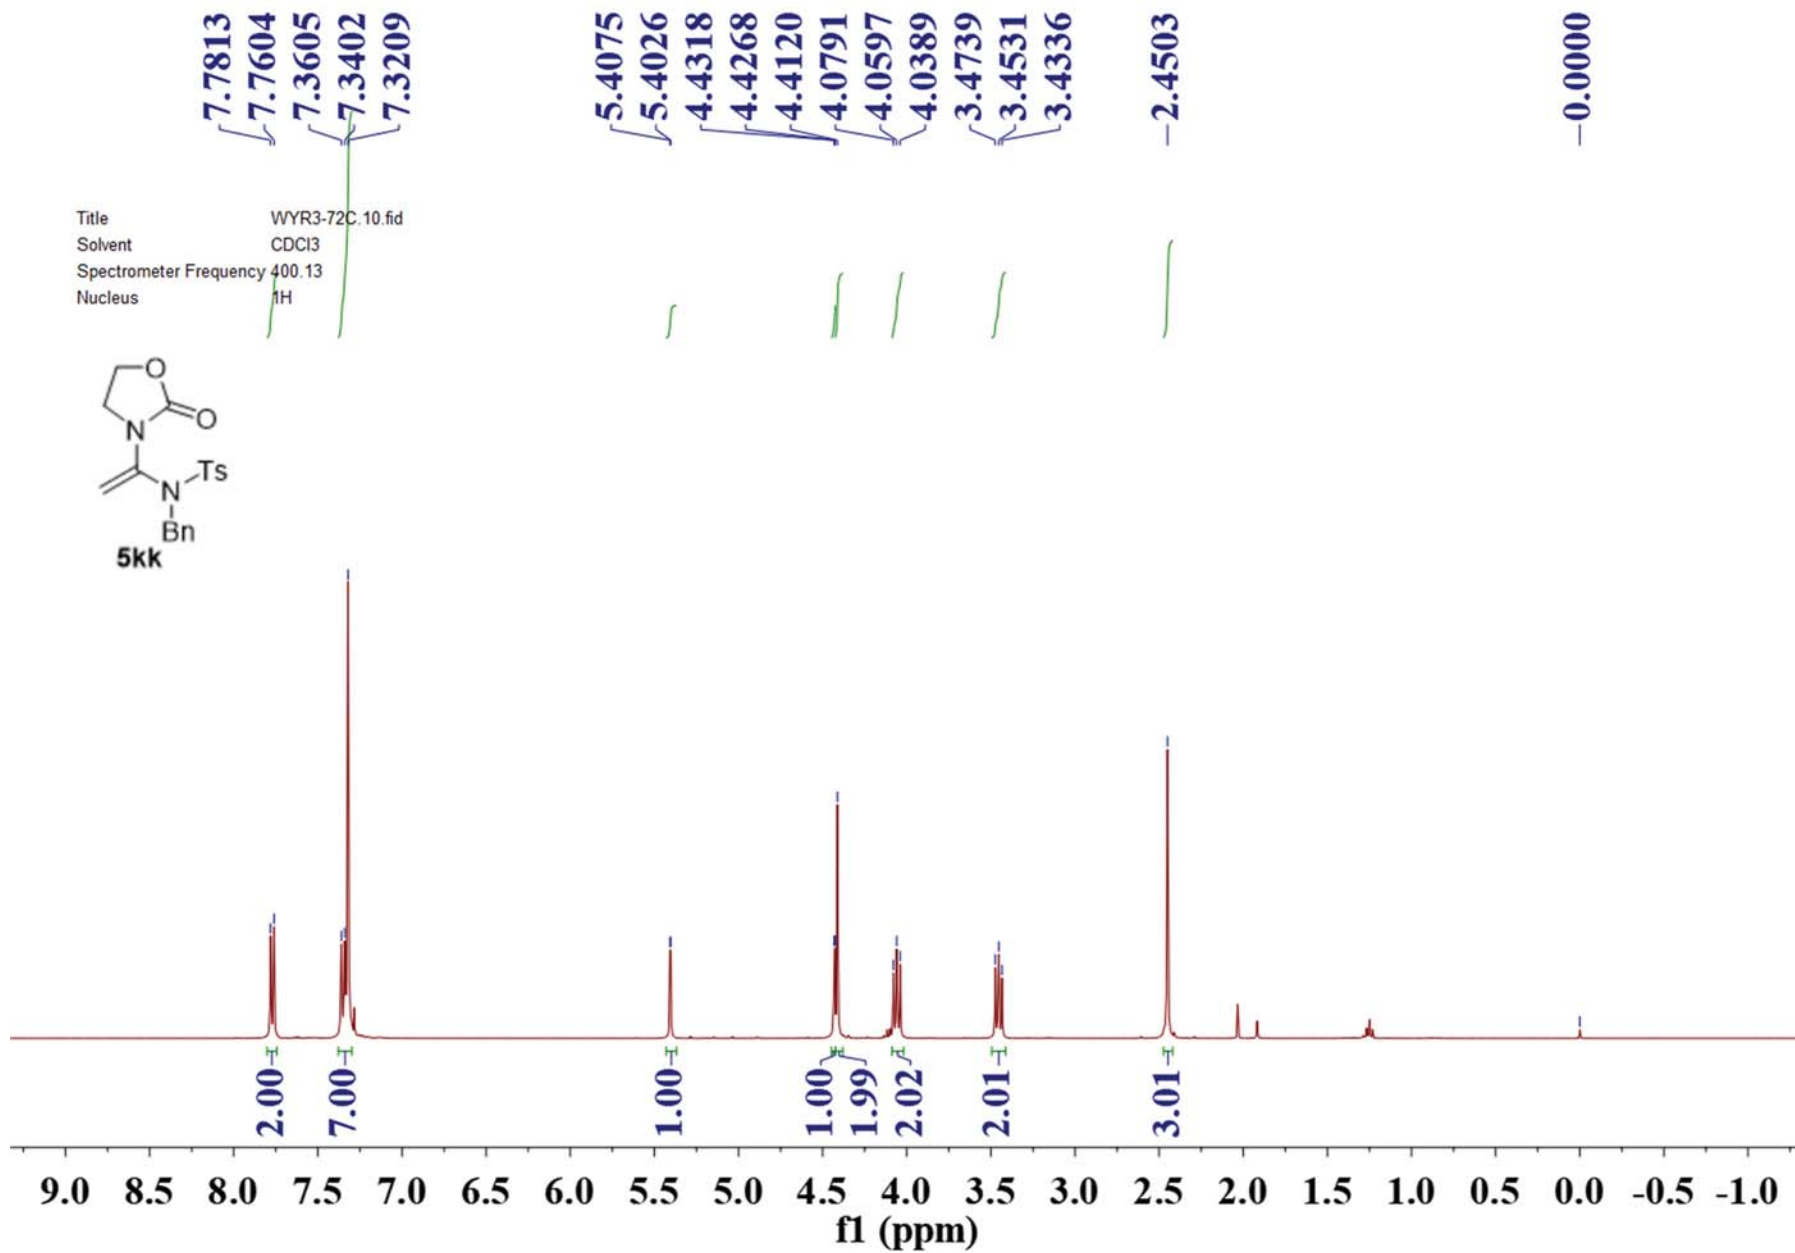

155.523  
 144.416  
 137.209  
 134.800  
 133.848  
 129.667  
 129.602  
 128.635  
 128.479  
 128.297  
 105.426  
 77.518  
 77.200  
 76.881  
 61.675  
 55.132  
 44.065  
 21.657

Title WYR3-72C1/ 10  
 Solvent CDCl3  
 Spectrometer Frequency 100.62  
 Nucleus 13C

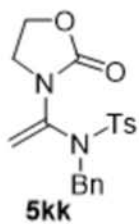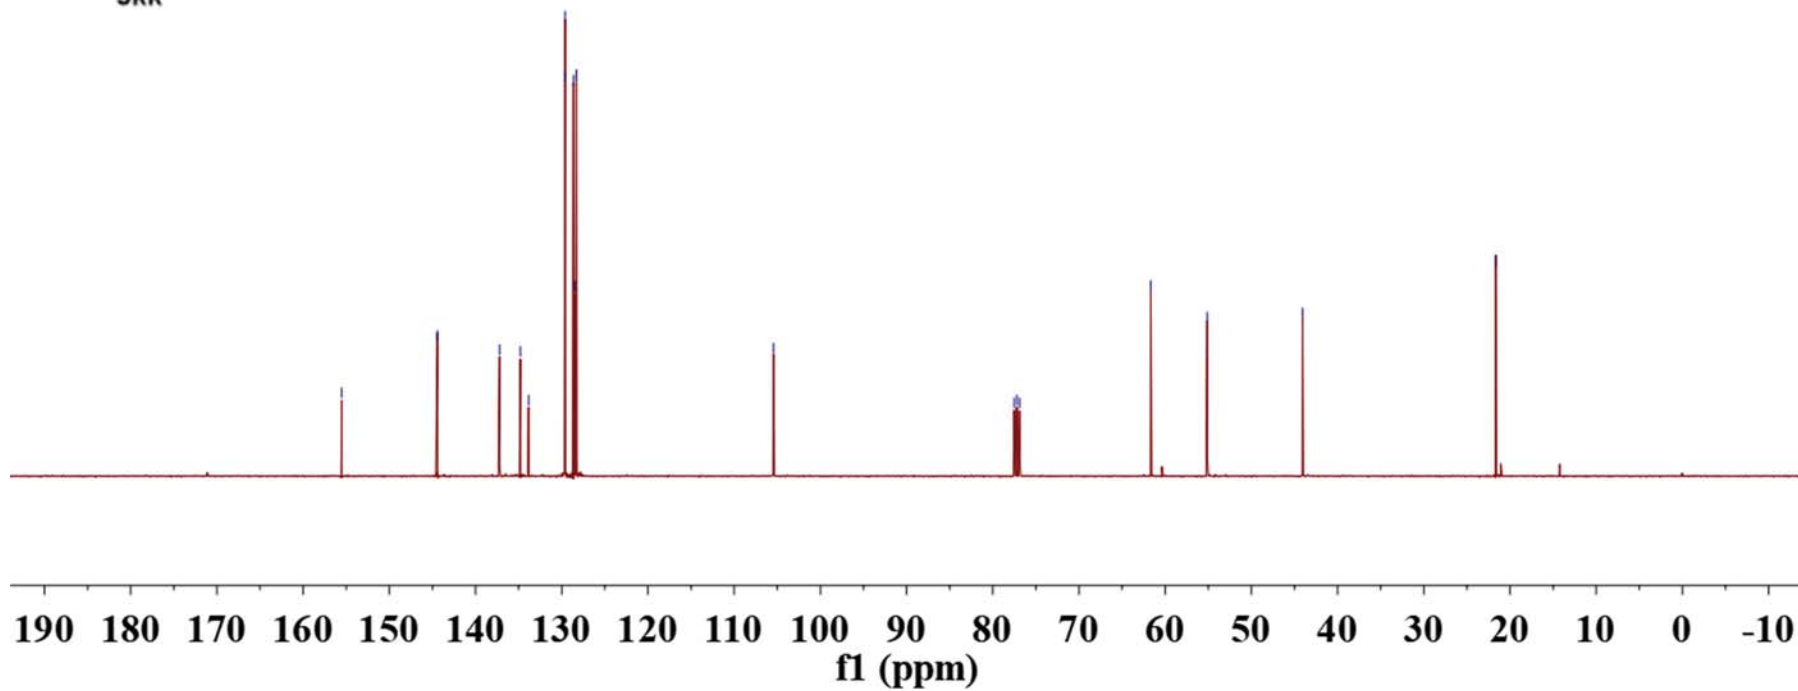

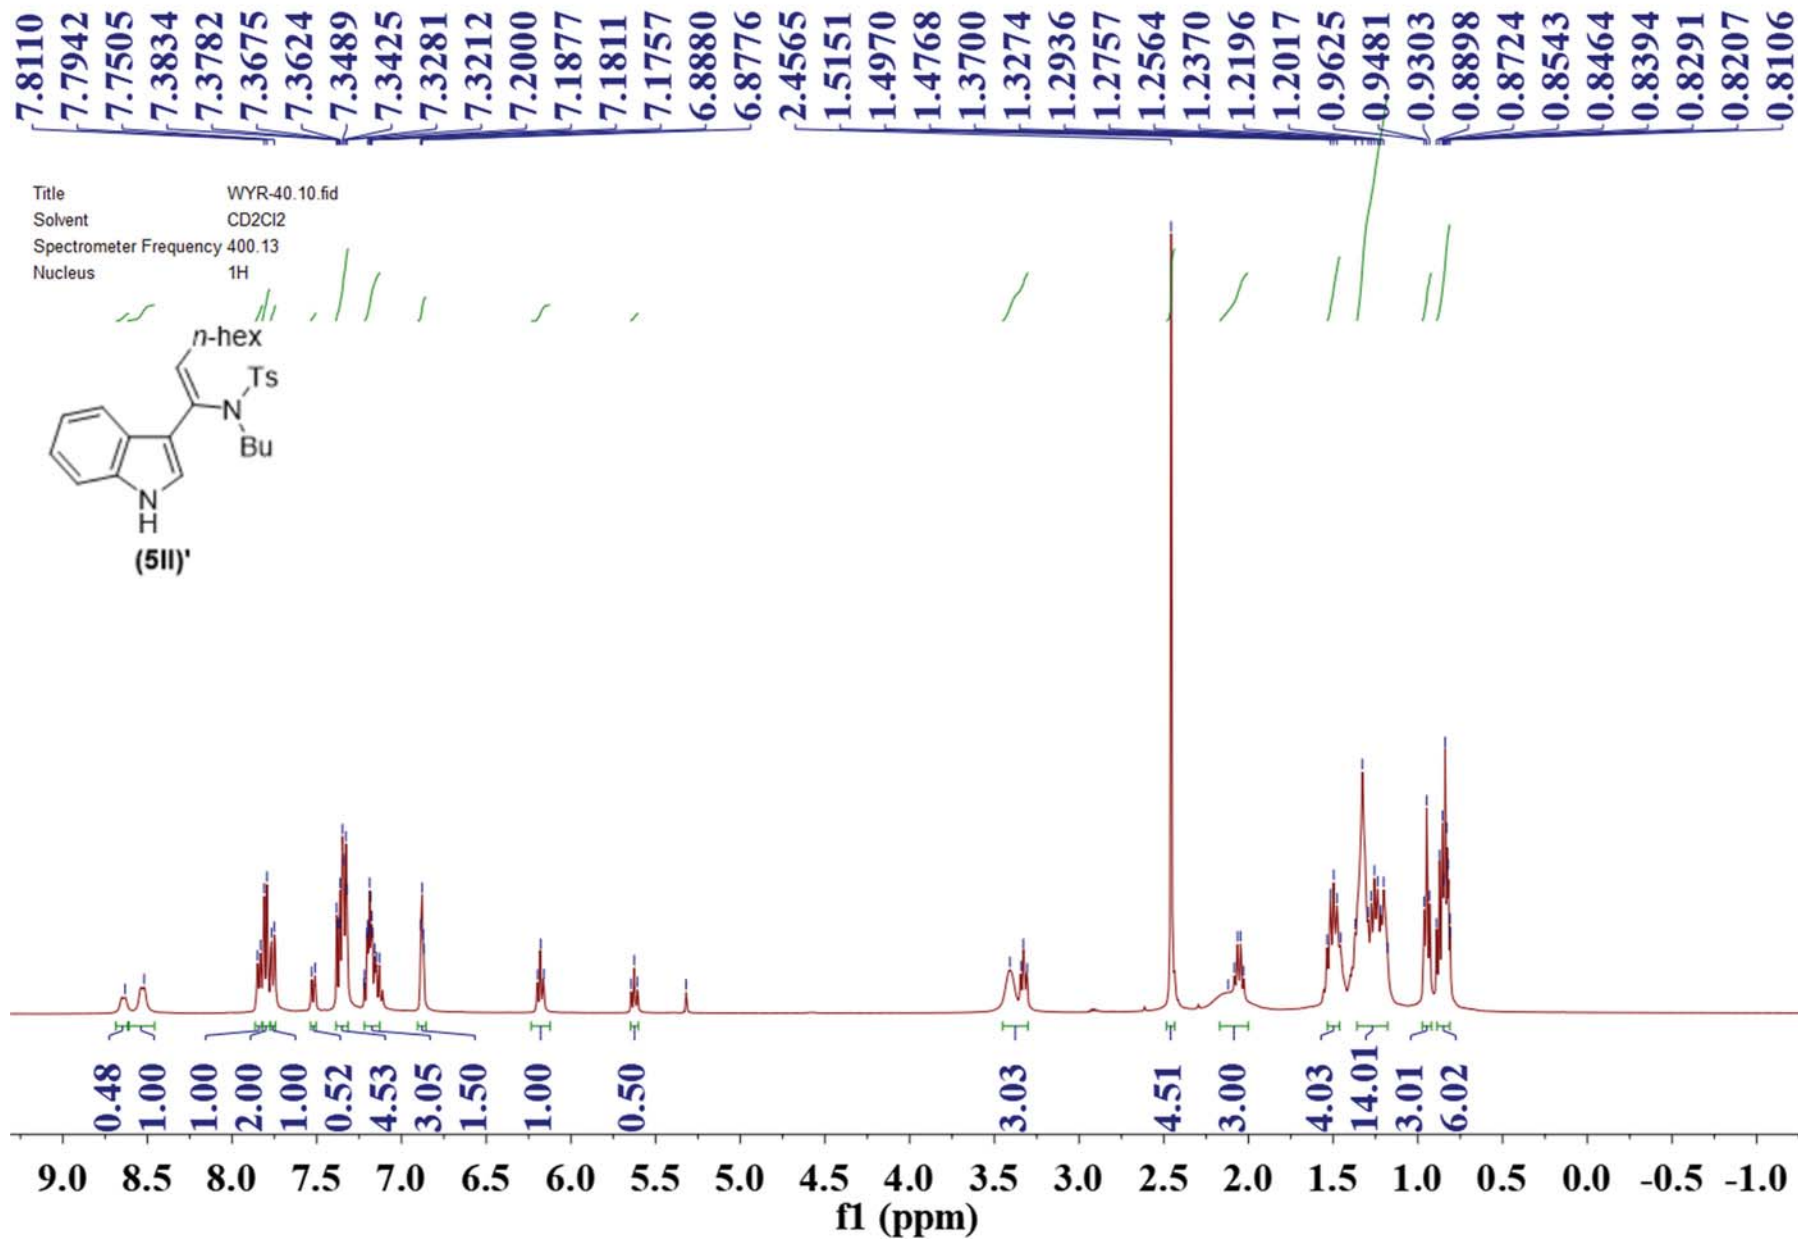

143.766  
 138.318  
 137.097  
 132.288  
 130.602  
 129.885  
 129.742  
 127.927  
 127.833  
 125.837  
 124.649  
 122.492  
 120.486  
 120.096  
 115.099  
 111.912  
 54.341  
 54.070  
 53.800  
 53.530  
 53.259  
 49.356  
 32.117  
 32.015  
 31.428  
 30.966  
 29.903  
 29.756  
 29.523  
 29.465  
 29.161  
 23.044  
 22.960  
 21.616  
 20.368  
 20.047  
 14.270  
 14.212  
 13.866  
 13.836

Title WYR4-40.11.fid  
 Solvent CD2Cl2  
 Spectrometer Frequency 100.62  
 Nucleus 13C

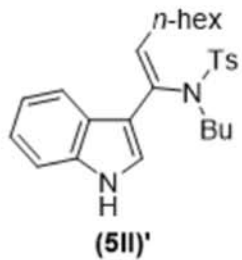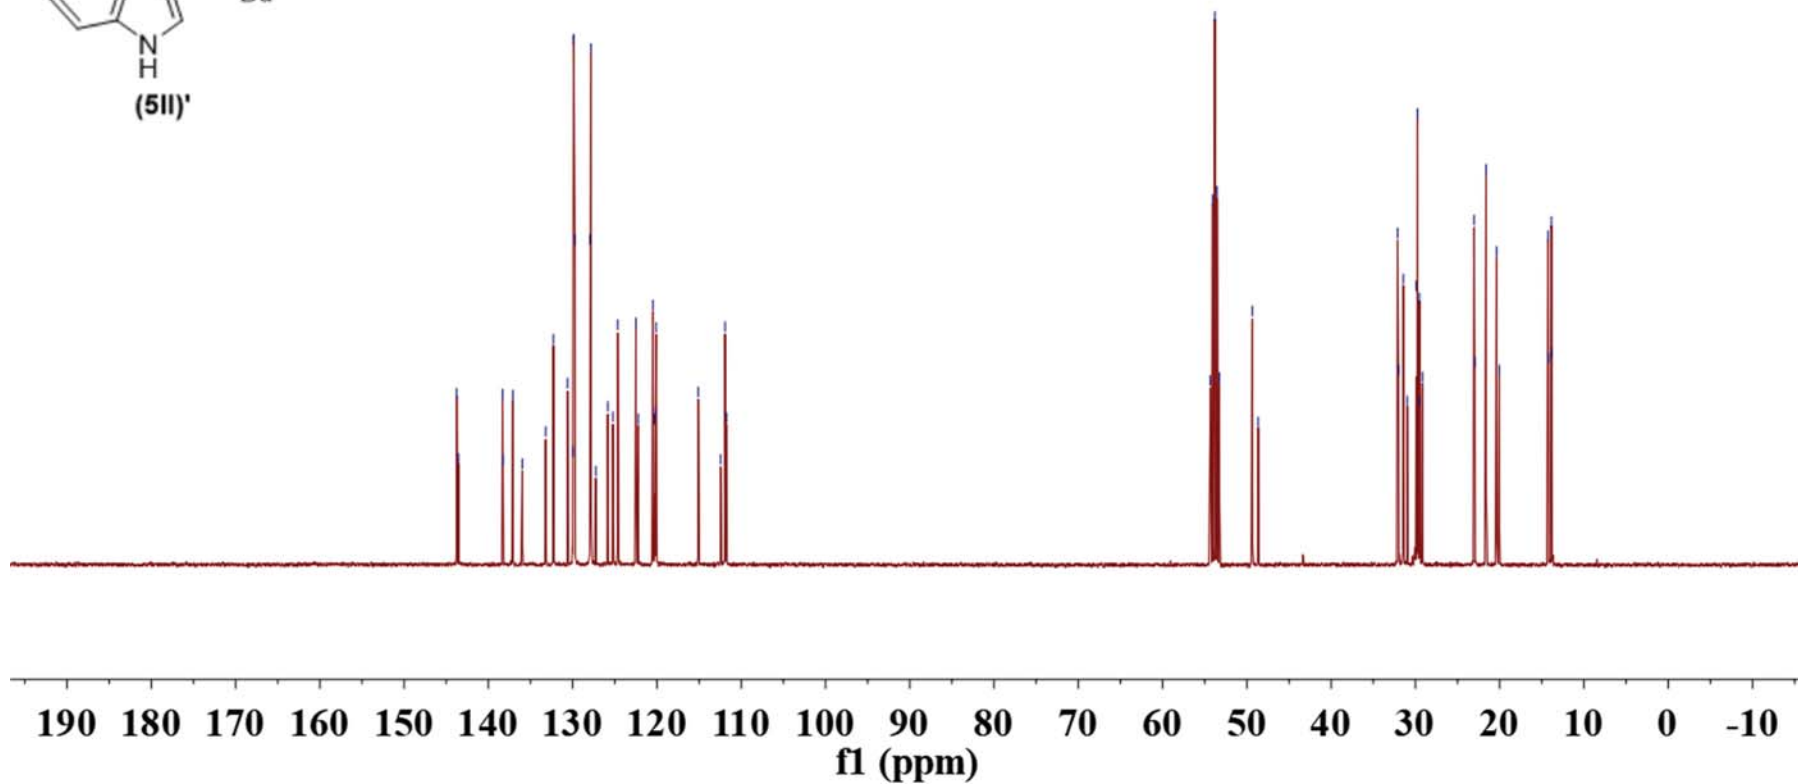

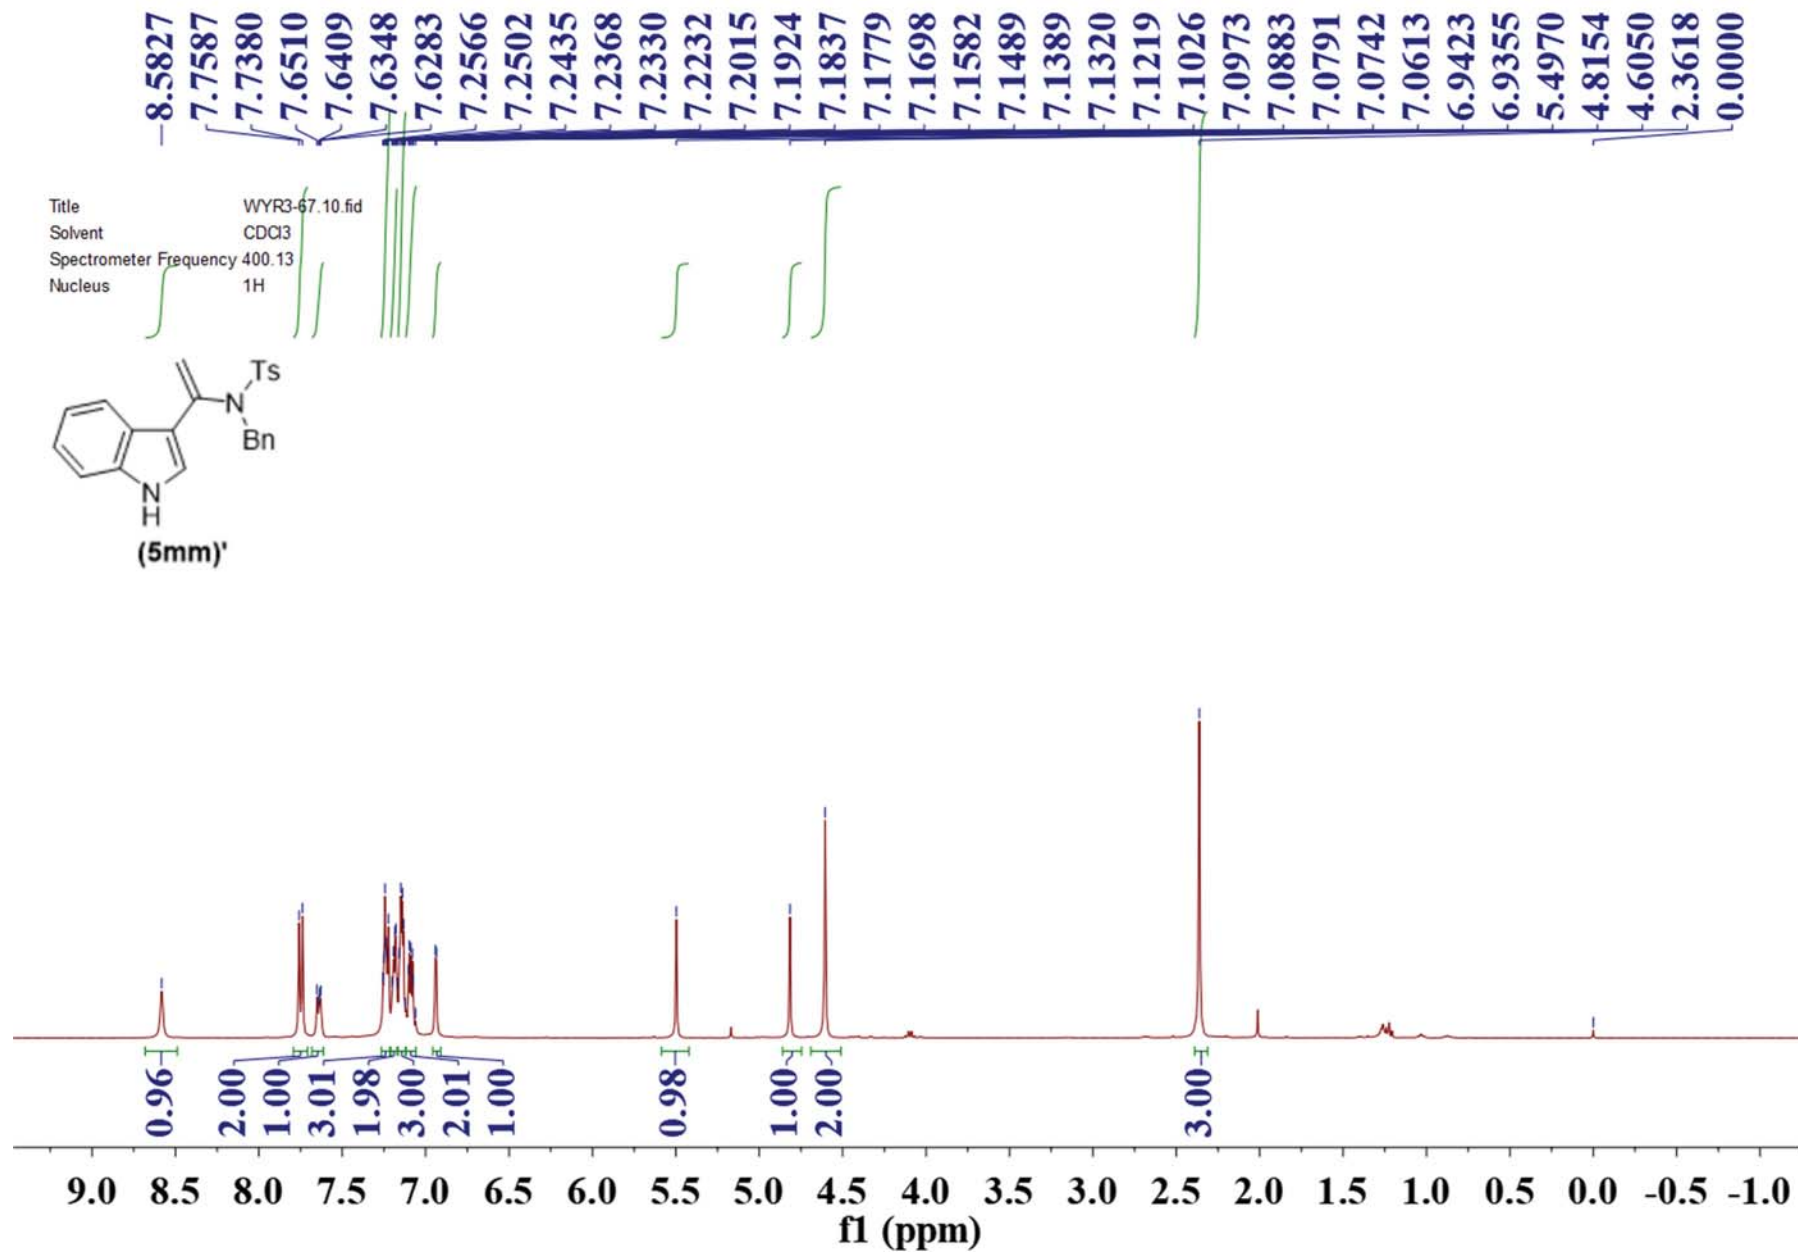

143.628  
139.963  
136.854  
136.466  
136.452  
129.562  
129.231  
128.302  
128.023  
127.727  
125.805  
125.063  
122.330  
120.460  
119.682  
114.453  
111.964  
111.654  
77.518  
77.200  
76.882  
-53.828  
-21.629

Title WYR3-67.10.fid  
Solvent CDCl3  
Spectrometer Frequency 100.62  
Nucleus 13C

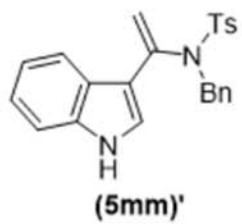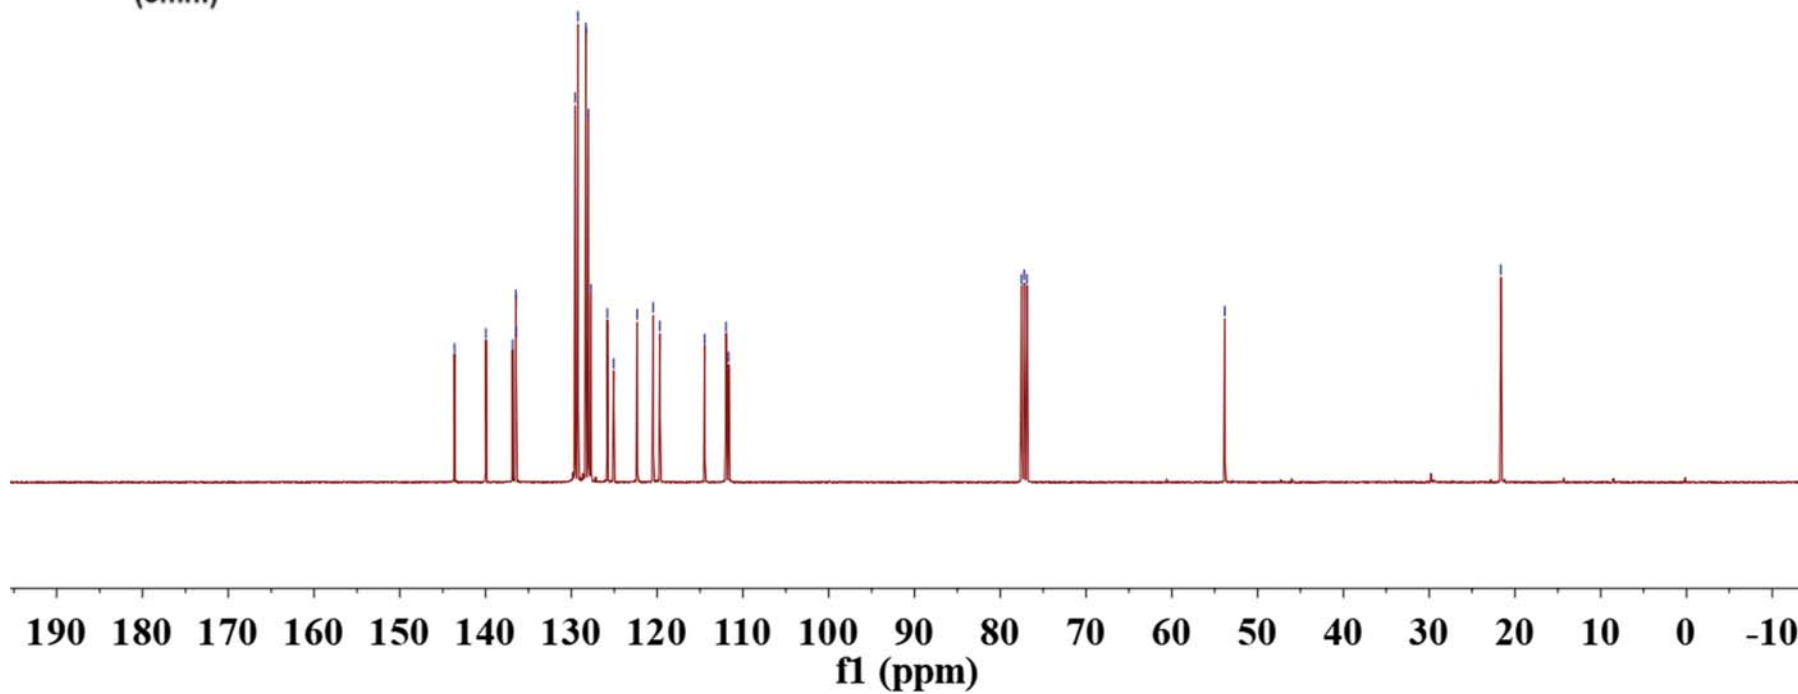

# $^1\text{H}$ NMR and $^{13}\text{C}$ NMR Spectra of 2-Aminoindoles 6.

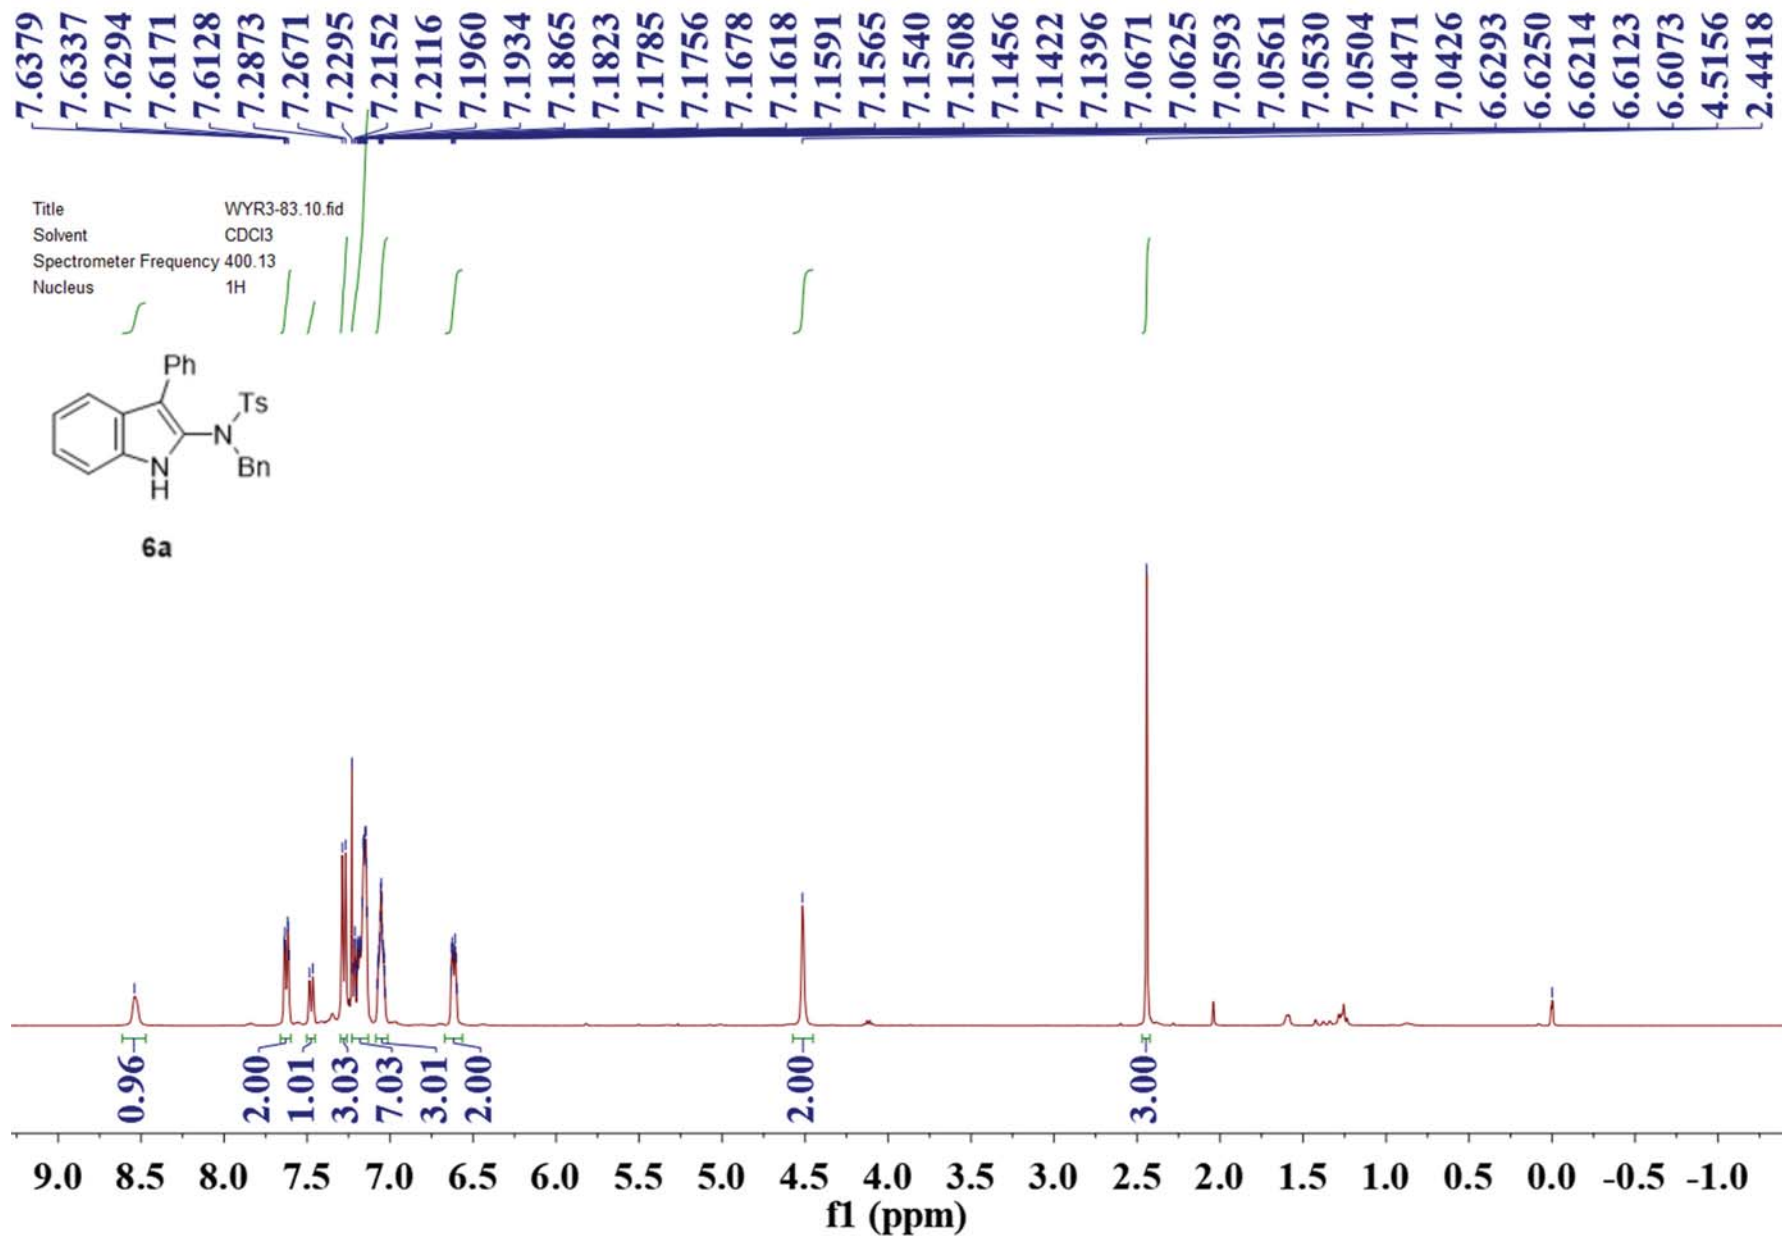



144.415  
136.284  
135.692  
133.411  
133.229  
130.063  
129.281  
128.548  
128.479  
128.465  
127.991  
127.965  
127.652  
126.973  
126.609  
123.124  
120.201  
119.610  
112.674  
111.160  
77.518  
77.200  
76.882  
-53.659  
-21.798

Title WYR2-83.10.fid  
Solvent CDCl3  
Spectrometer Frequency 100.62  
Nucleus 13C

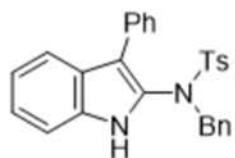

6a

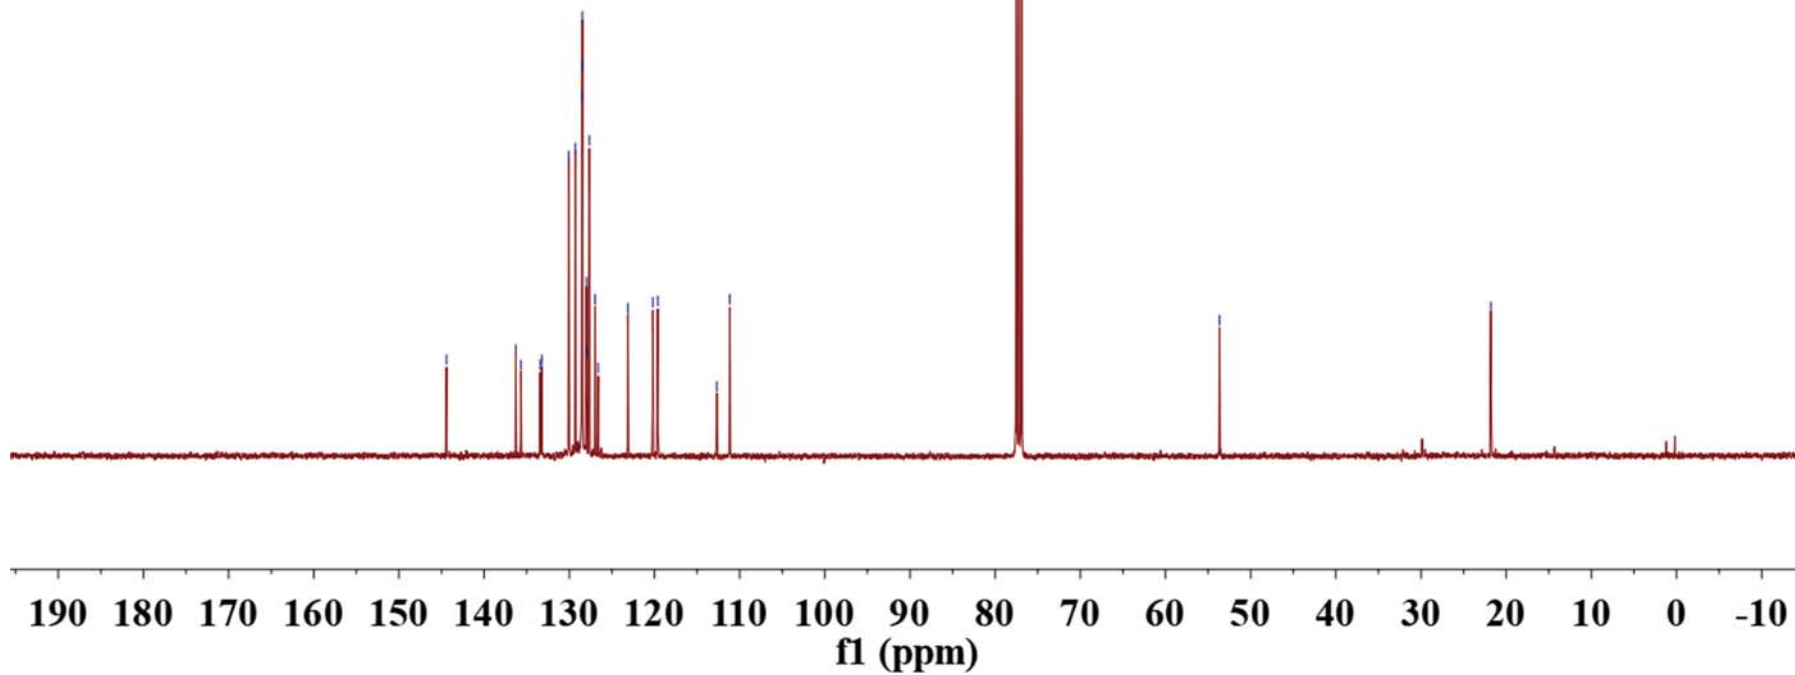

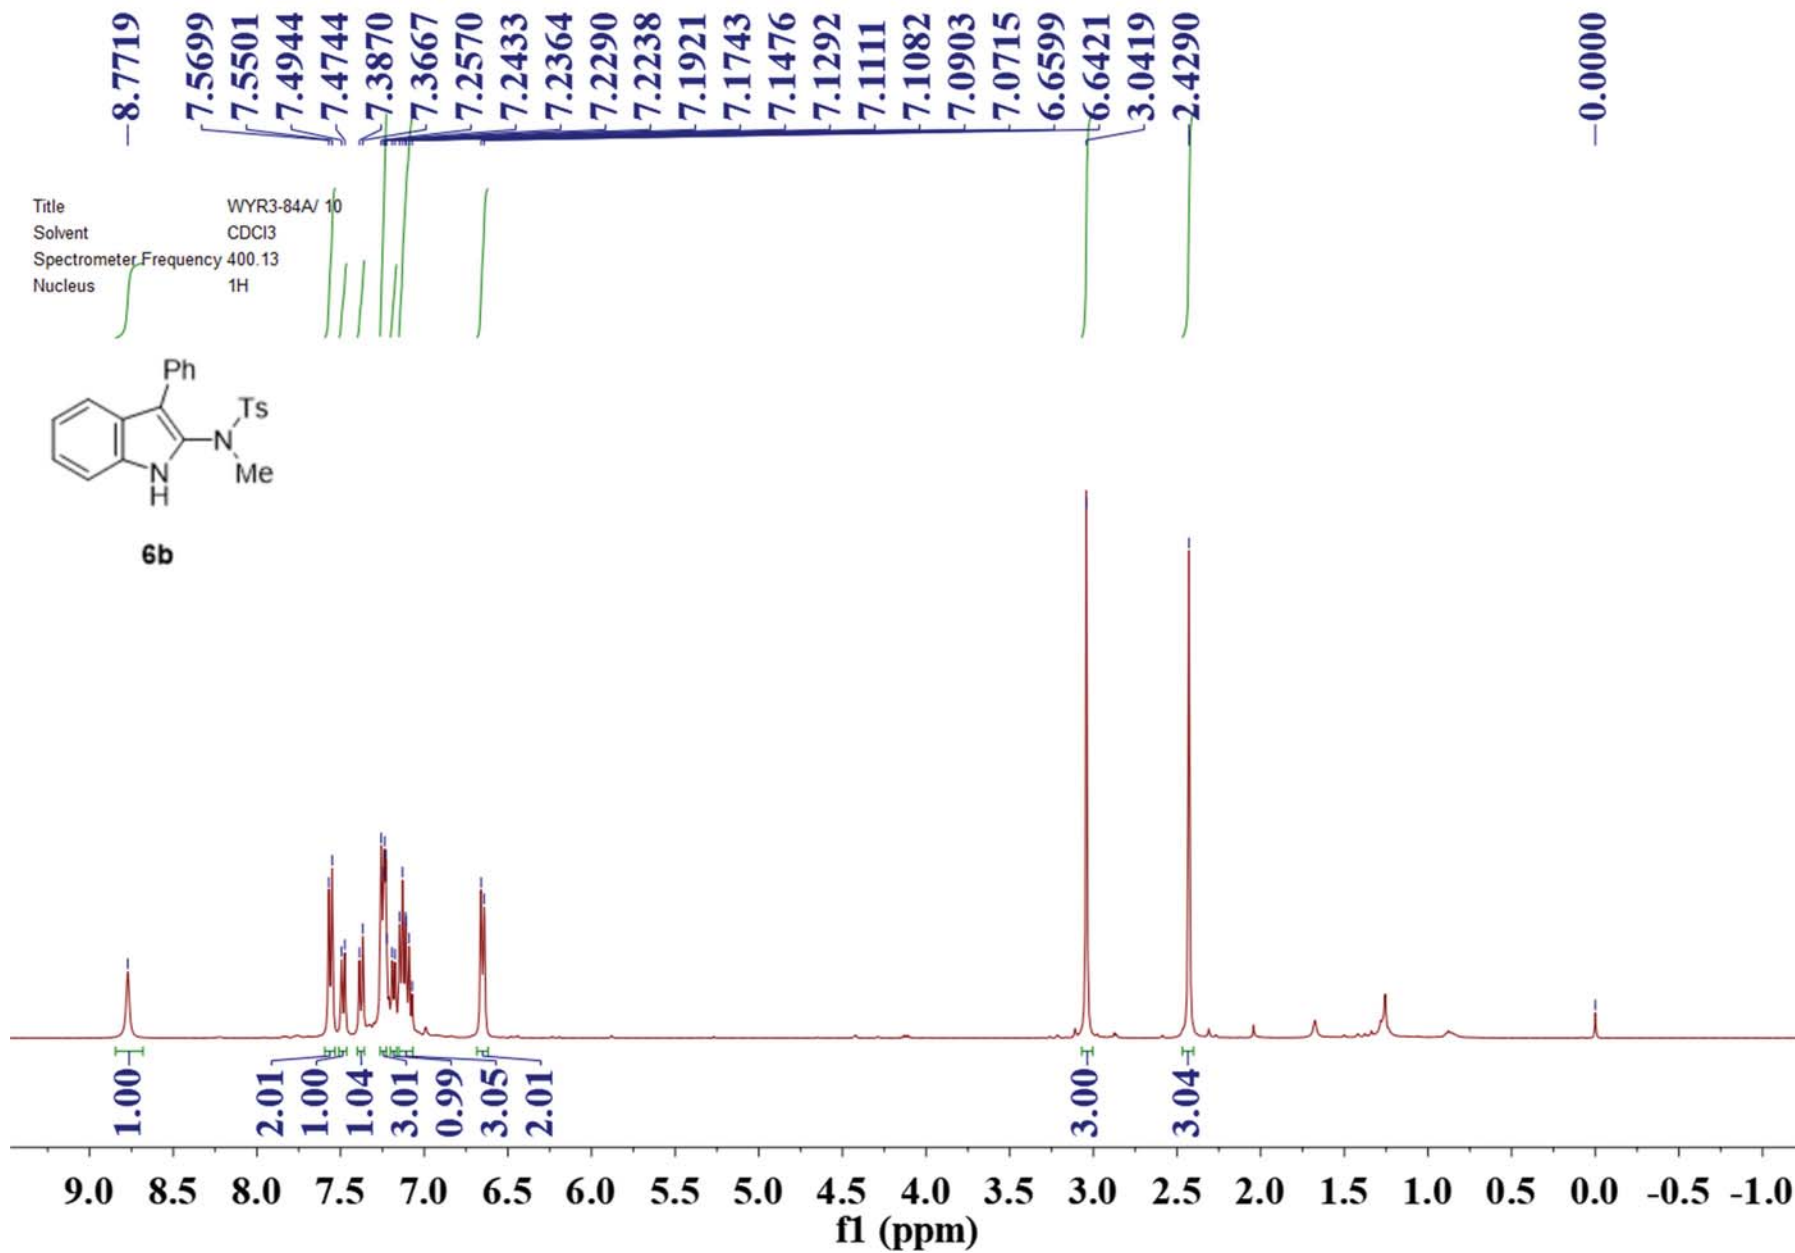

144.423  
134.207  
133.258  
133.173  
130.517  
129.956  
129.428  
128.254  
127.729  
126.818  
126.803  
123.205  
120.329  
119.538  
111.482  
111.129  
77.518  
77.200  
76.882  
-38.548  
-21.758

Title WYR3-84A.10.fid  
Solvent CDCl3  
Spectrometer Frequency 100.62  
Nucleus 13C

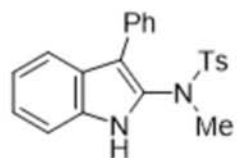

6b

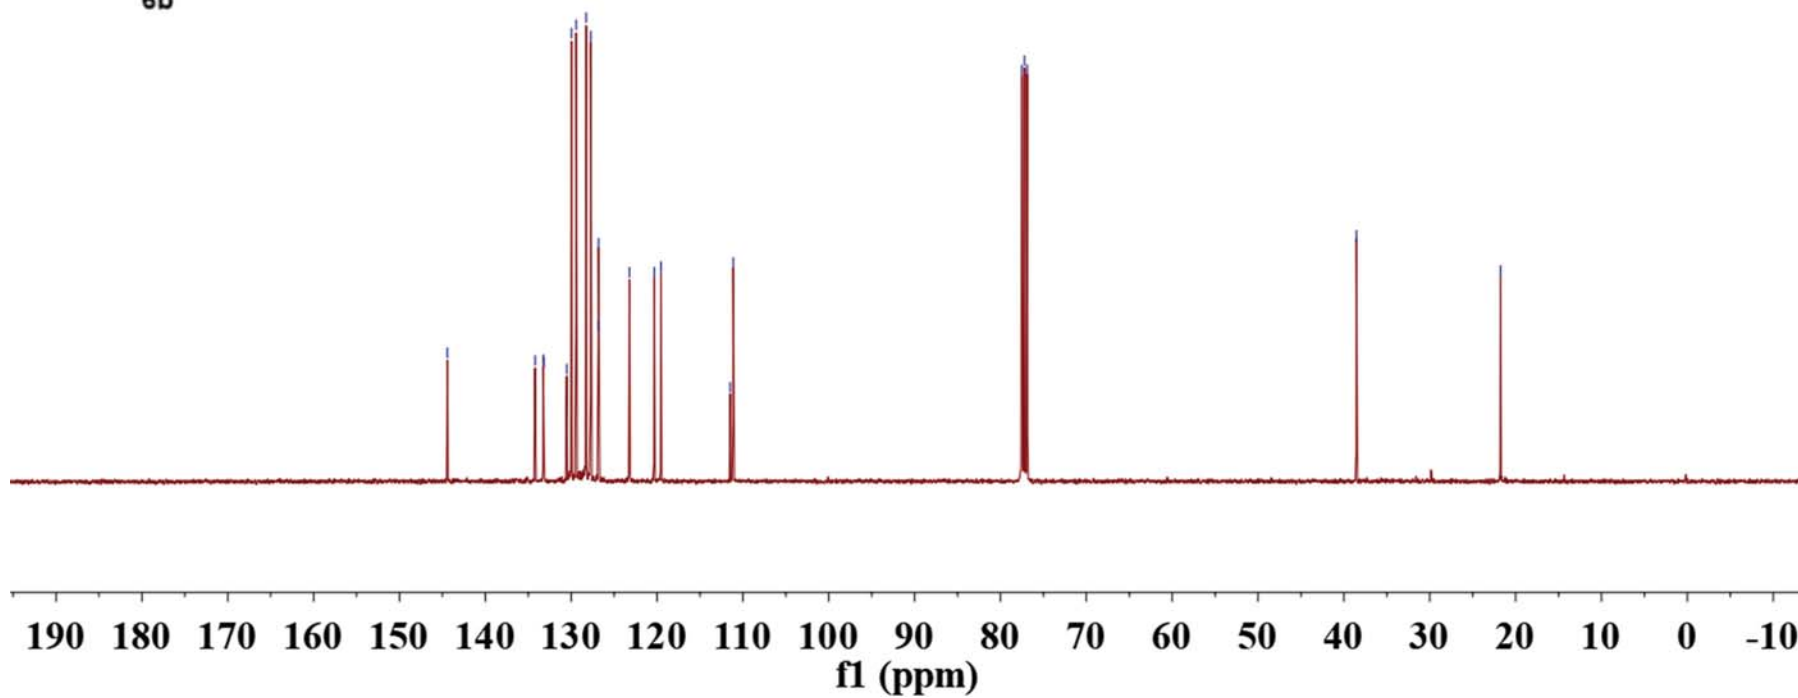

9.9022  
7.4791  
7.4743  
7.4629  
7.4581  
7.4539  
7.4488  
7.4329  
7.4304  
7.4258  
7.4228  
7.4154  
7.4112  
7.4056  
7.4030  
7.3706  
7.3530  
7.3469  
7.3297  
7.3269  
7.3245  
7.1970  
7.1939  
7.1793  
7.1763  
7.1736  
7.1592  
7.1560  
7.1026  
7.0999  
7.0849  
7.0825  
7.0800  
4.3756  
4.3565  
4.3353  
3.6779  
3.6574  
3.6375  
0.0000

Title WYR2-80A.10.fid  
Solvent CDCl3  
Spectrometer Frequency 400.13  
Nucleus 1H

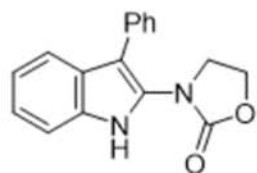

6c

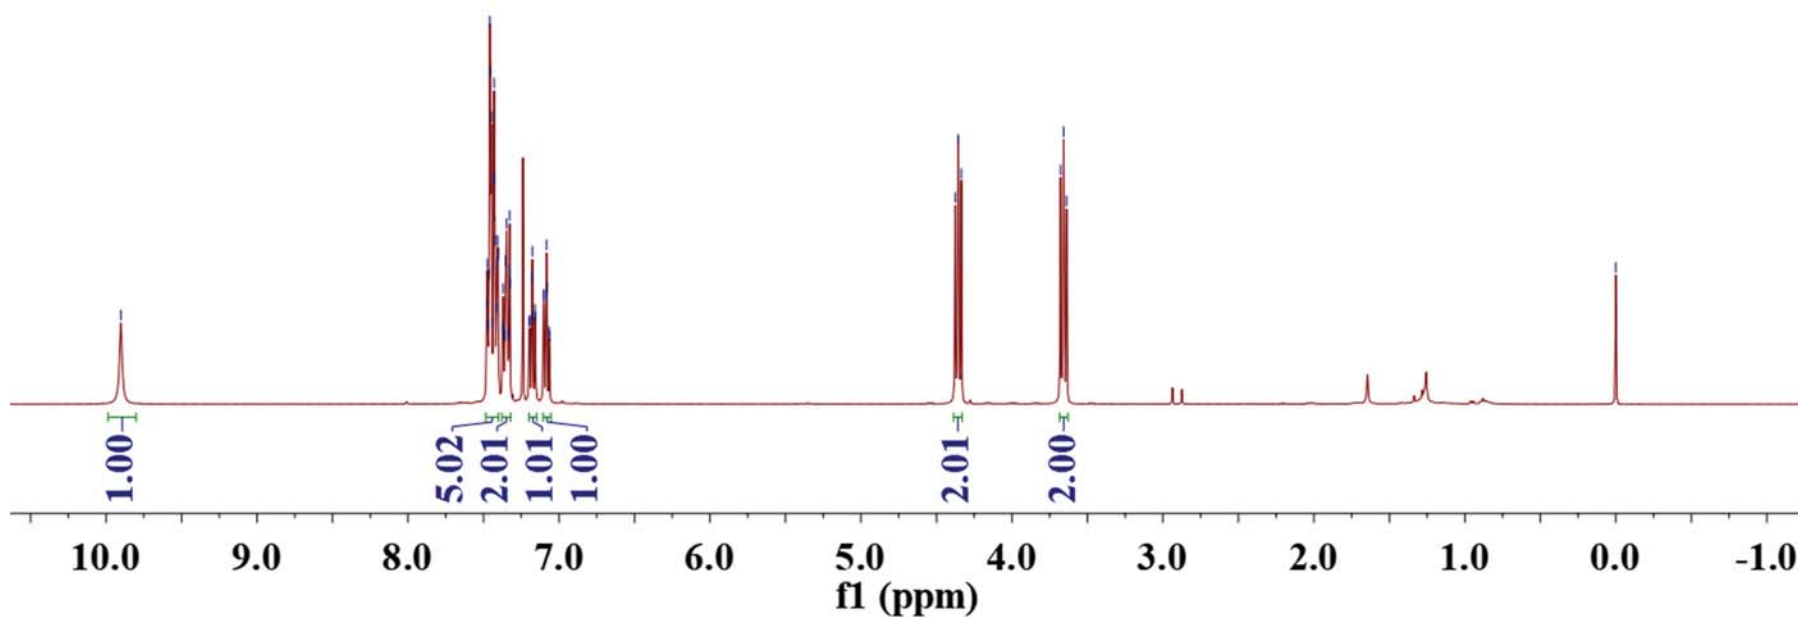

156.883  
133.772  
132.310  
130.838  
129.121  
128.499  
127.562  
127.218  
122.241  
120.435  
118.593  
110.916  
104.767  
77.518  
77.200  
76.882  
63.210  
46.001

Title WYR2-80A/ 10  
Solvent CDCl3  
Spectrometer Frequency 100.62  
Nucleus 13C

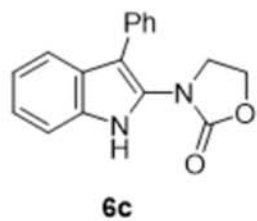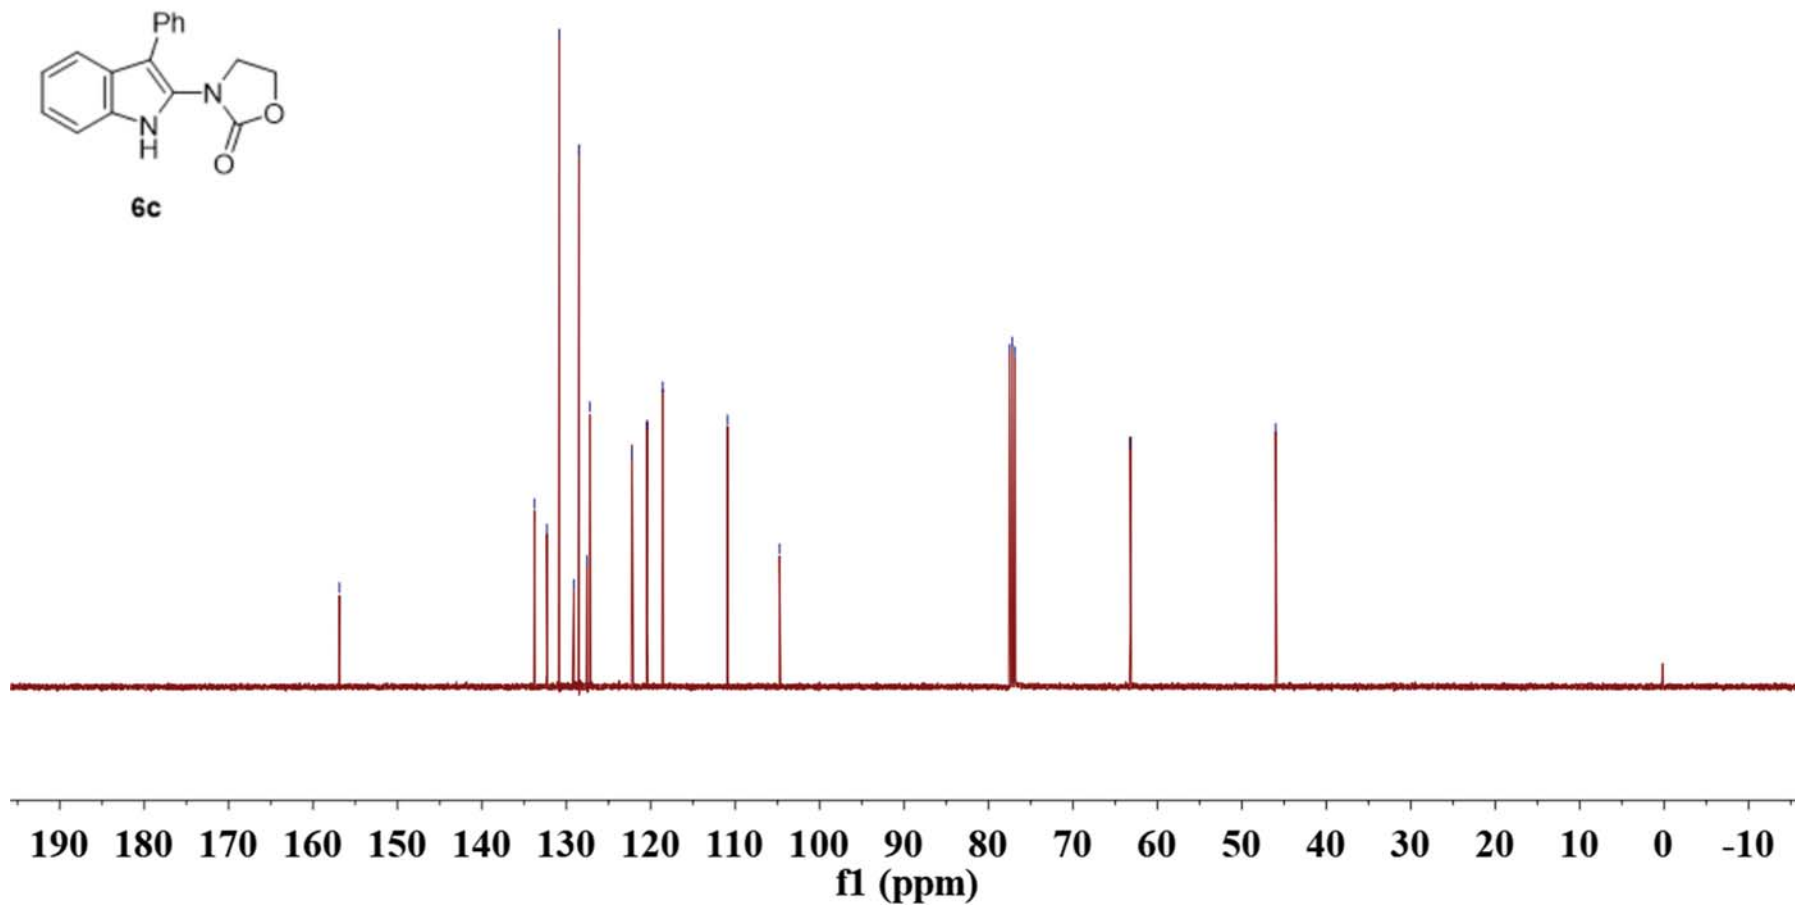

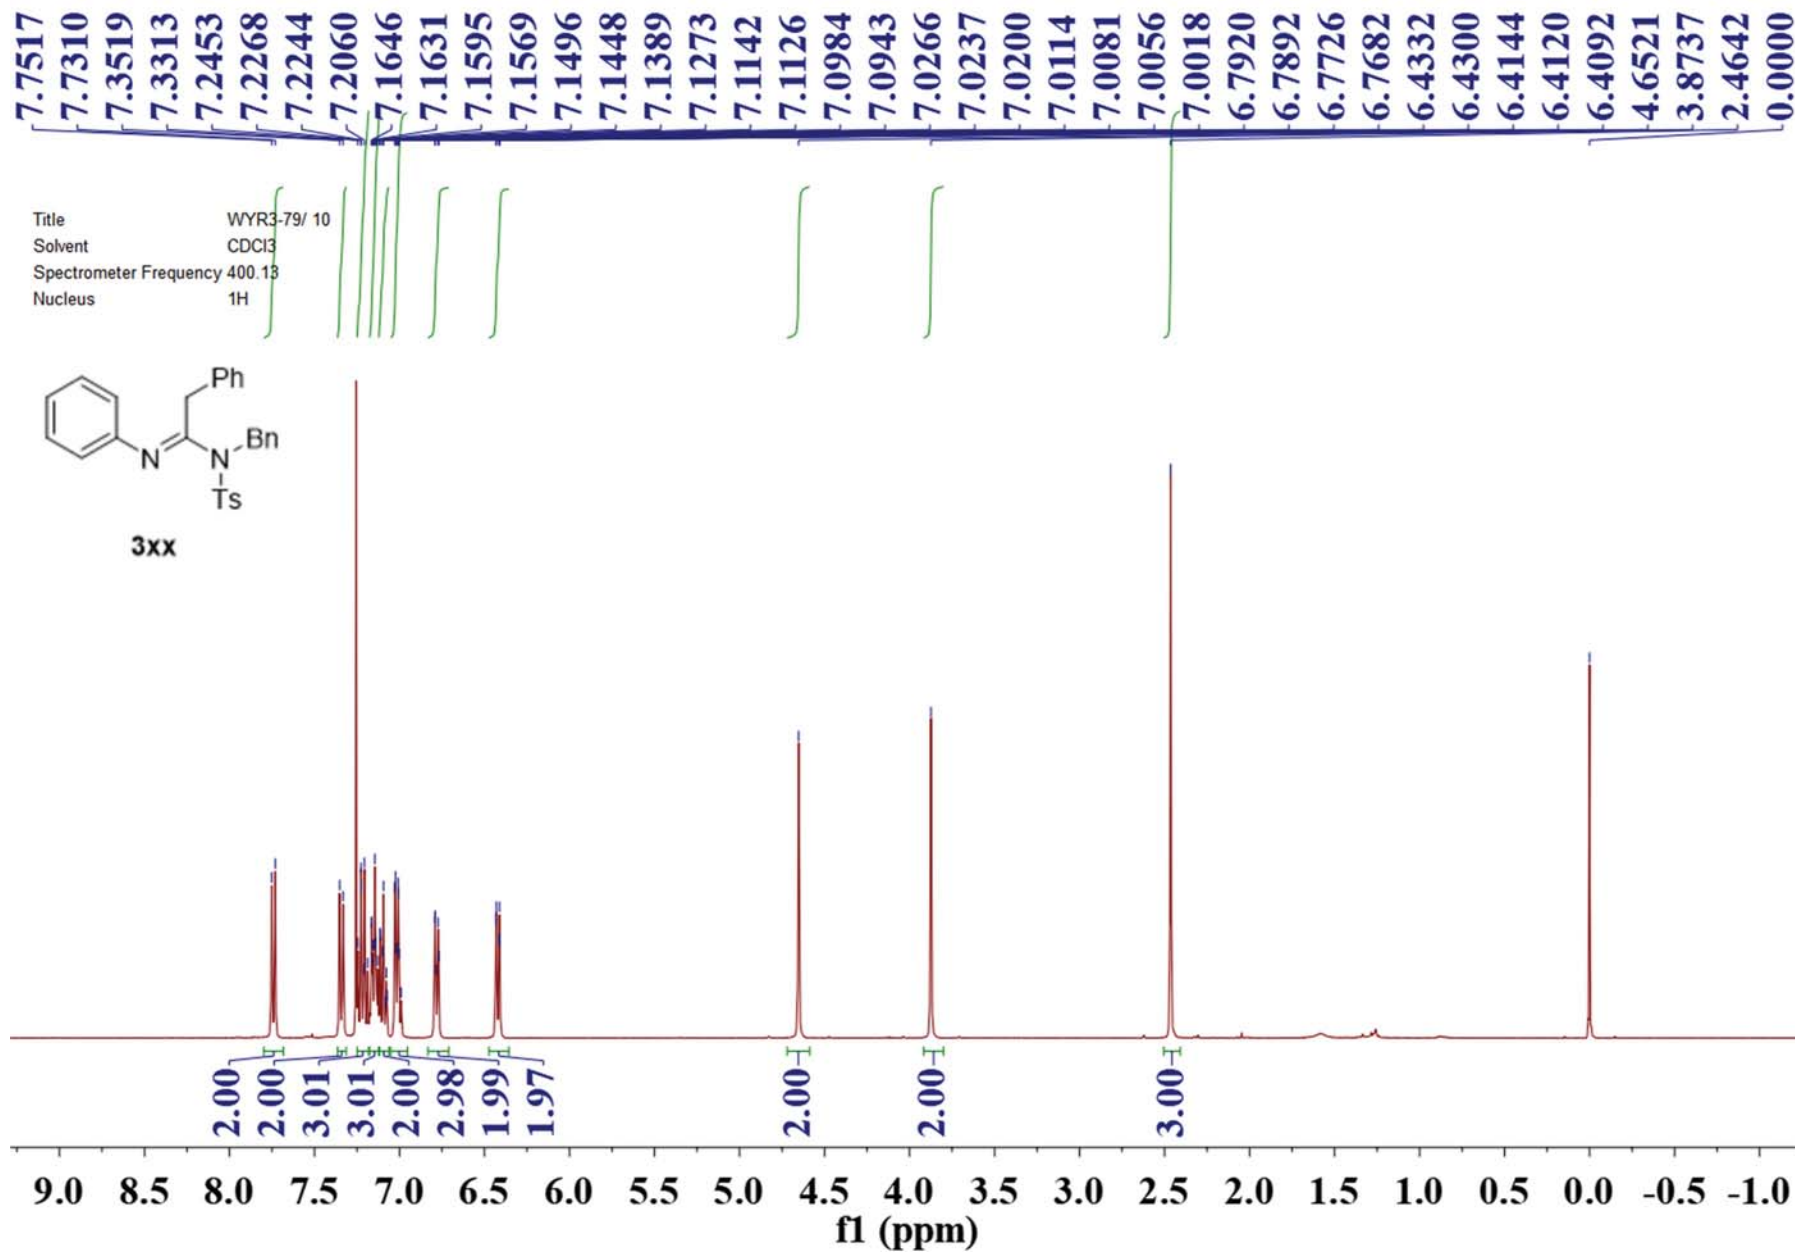

Title WYR3-79.10.fid  
Solvent CDCl3  
Spectrometer Frequency 100.62  
Nucleus 13C

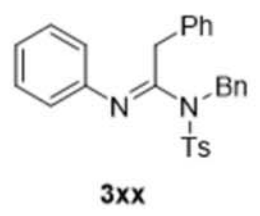

155.780  
148.226  
144.344  
135.950  
135.454  
134.861  
129.683  
129.347  
129.191  
129.001  
128.542  
128.276  
128.200  
127.412  
126.634  
123.700  
119.630

77.518  
77.200  
76.882

-51.212

-37.867

-21.848

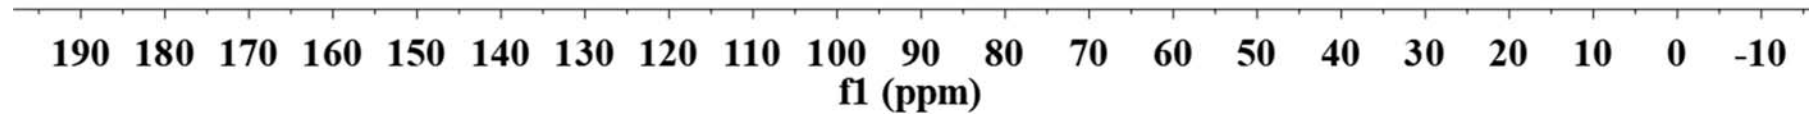

# NOESY Spectra of 3-Alkenylindoles (5p)' and (5ll)'

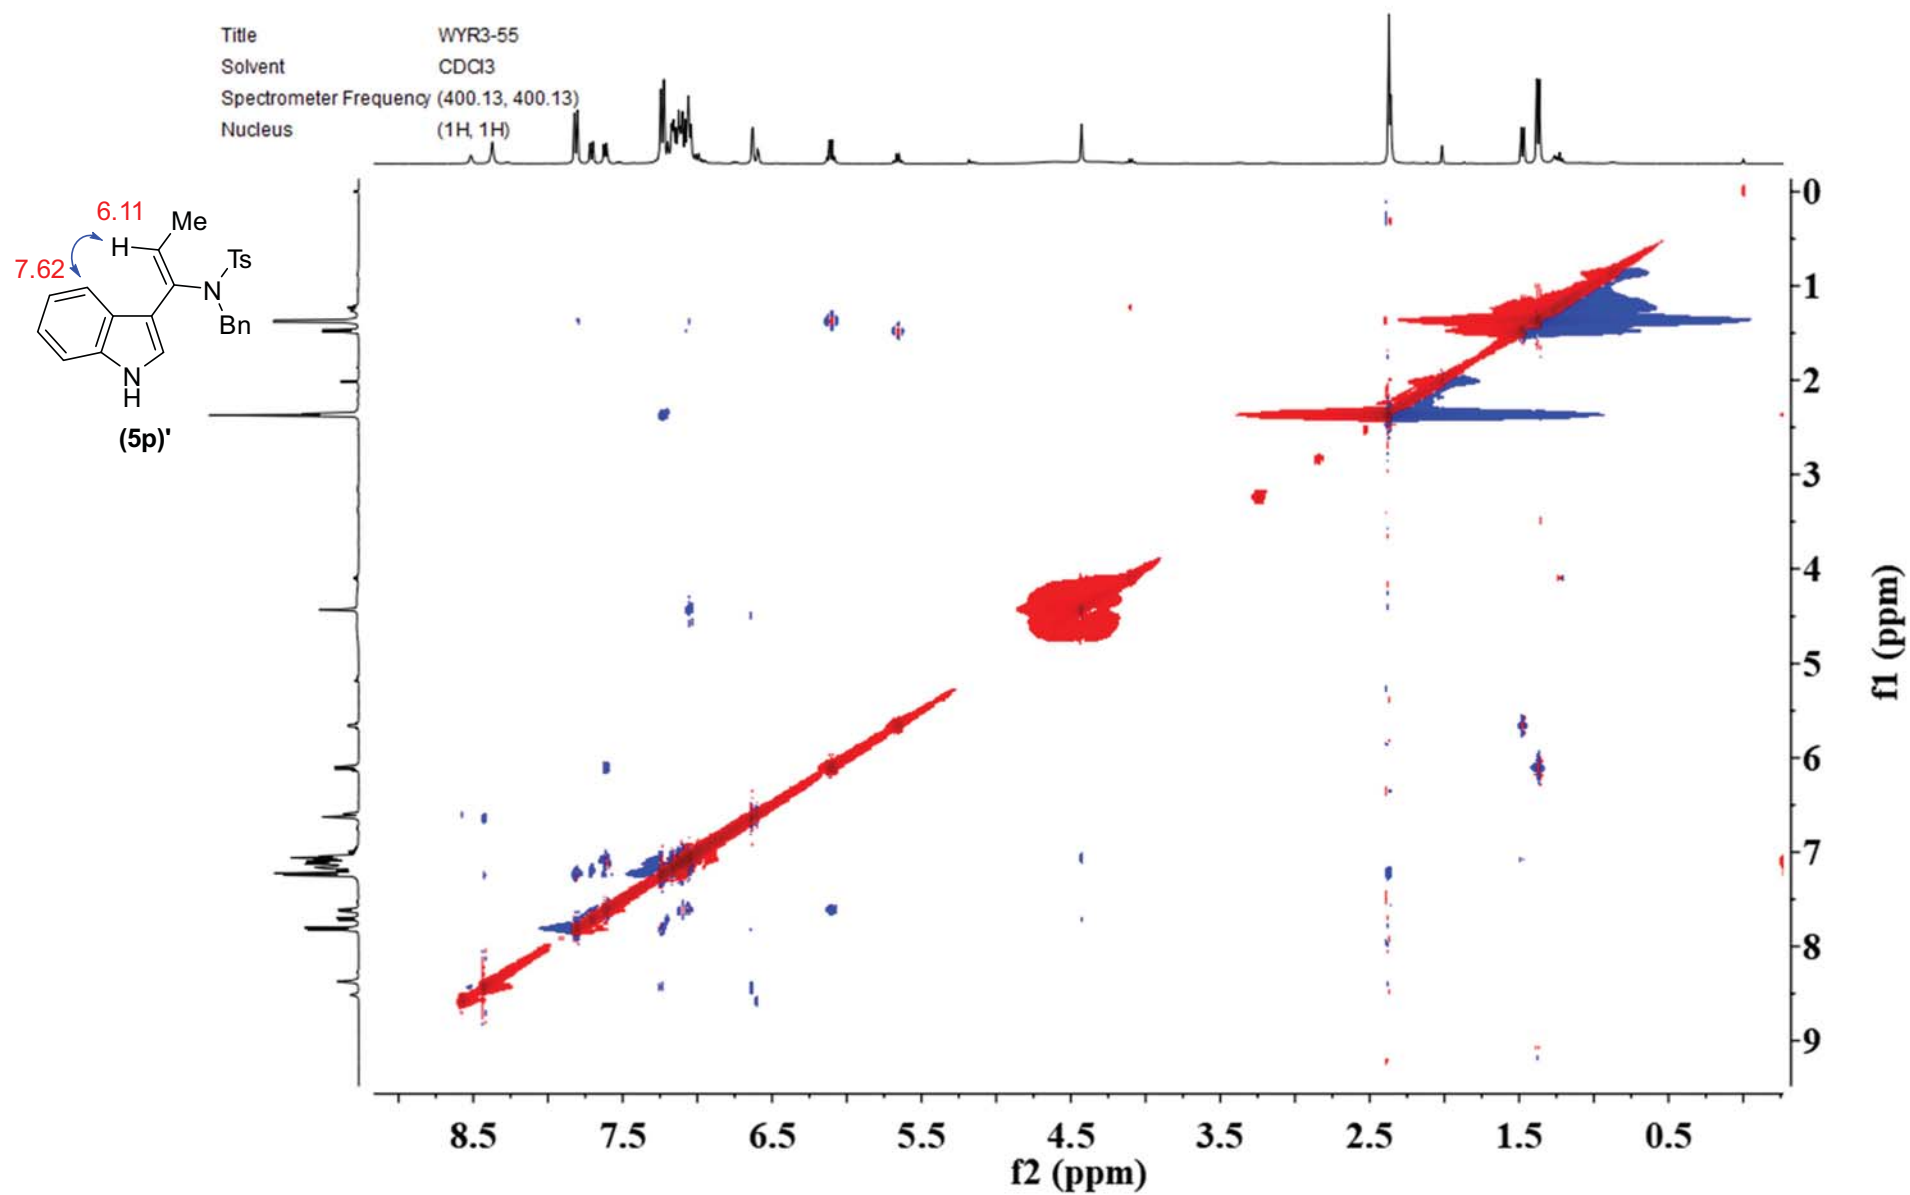



Title WYR3-55  
Solvent CDCl3  
Spectrometer Frequency (400.13, 400.13)  
Nucleus (1H, 1H)

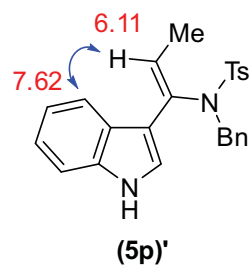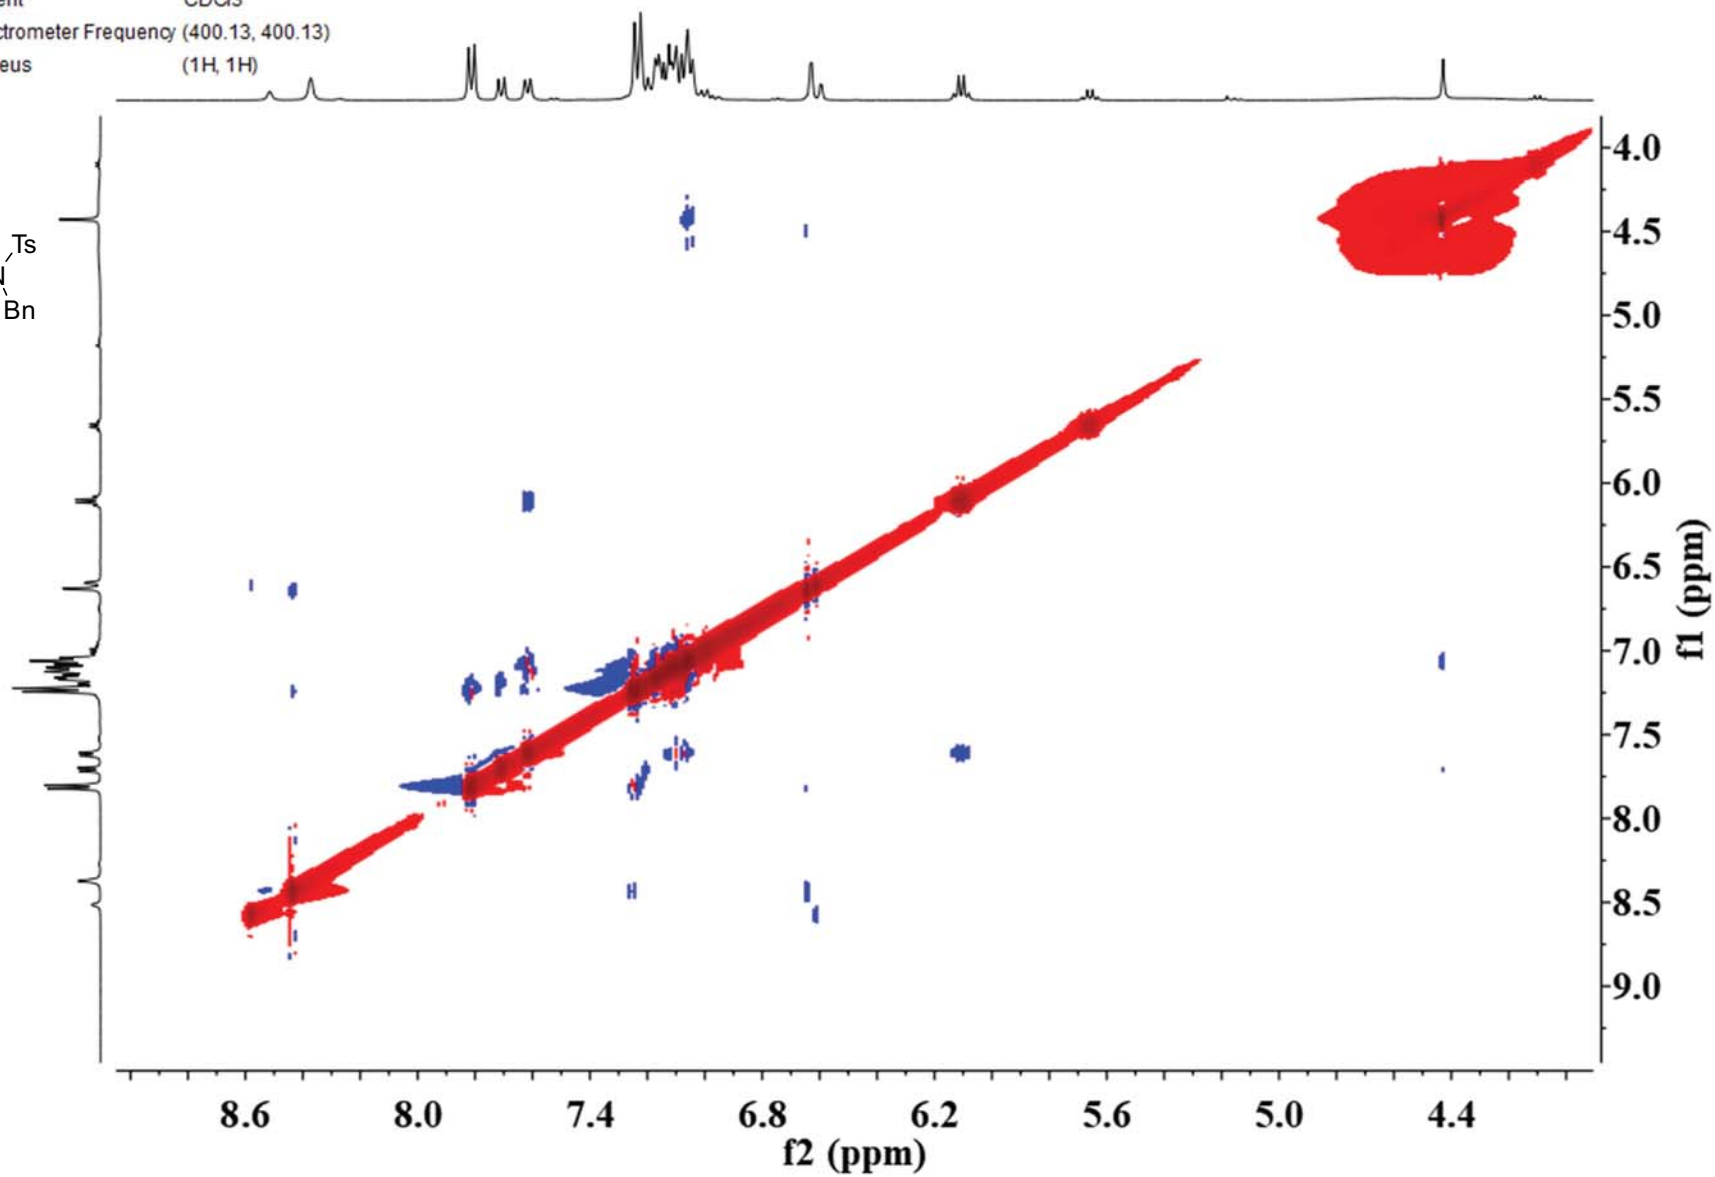

Title WYR4-40  
Solvent CDCl3  
Spectrometer Frequency (400.13, 400.13)  
Nucleus (1H, 1H)

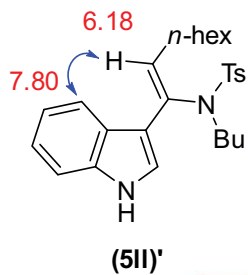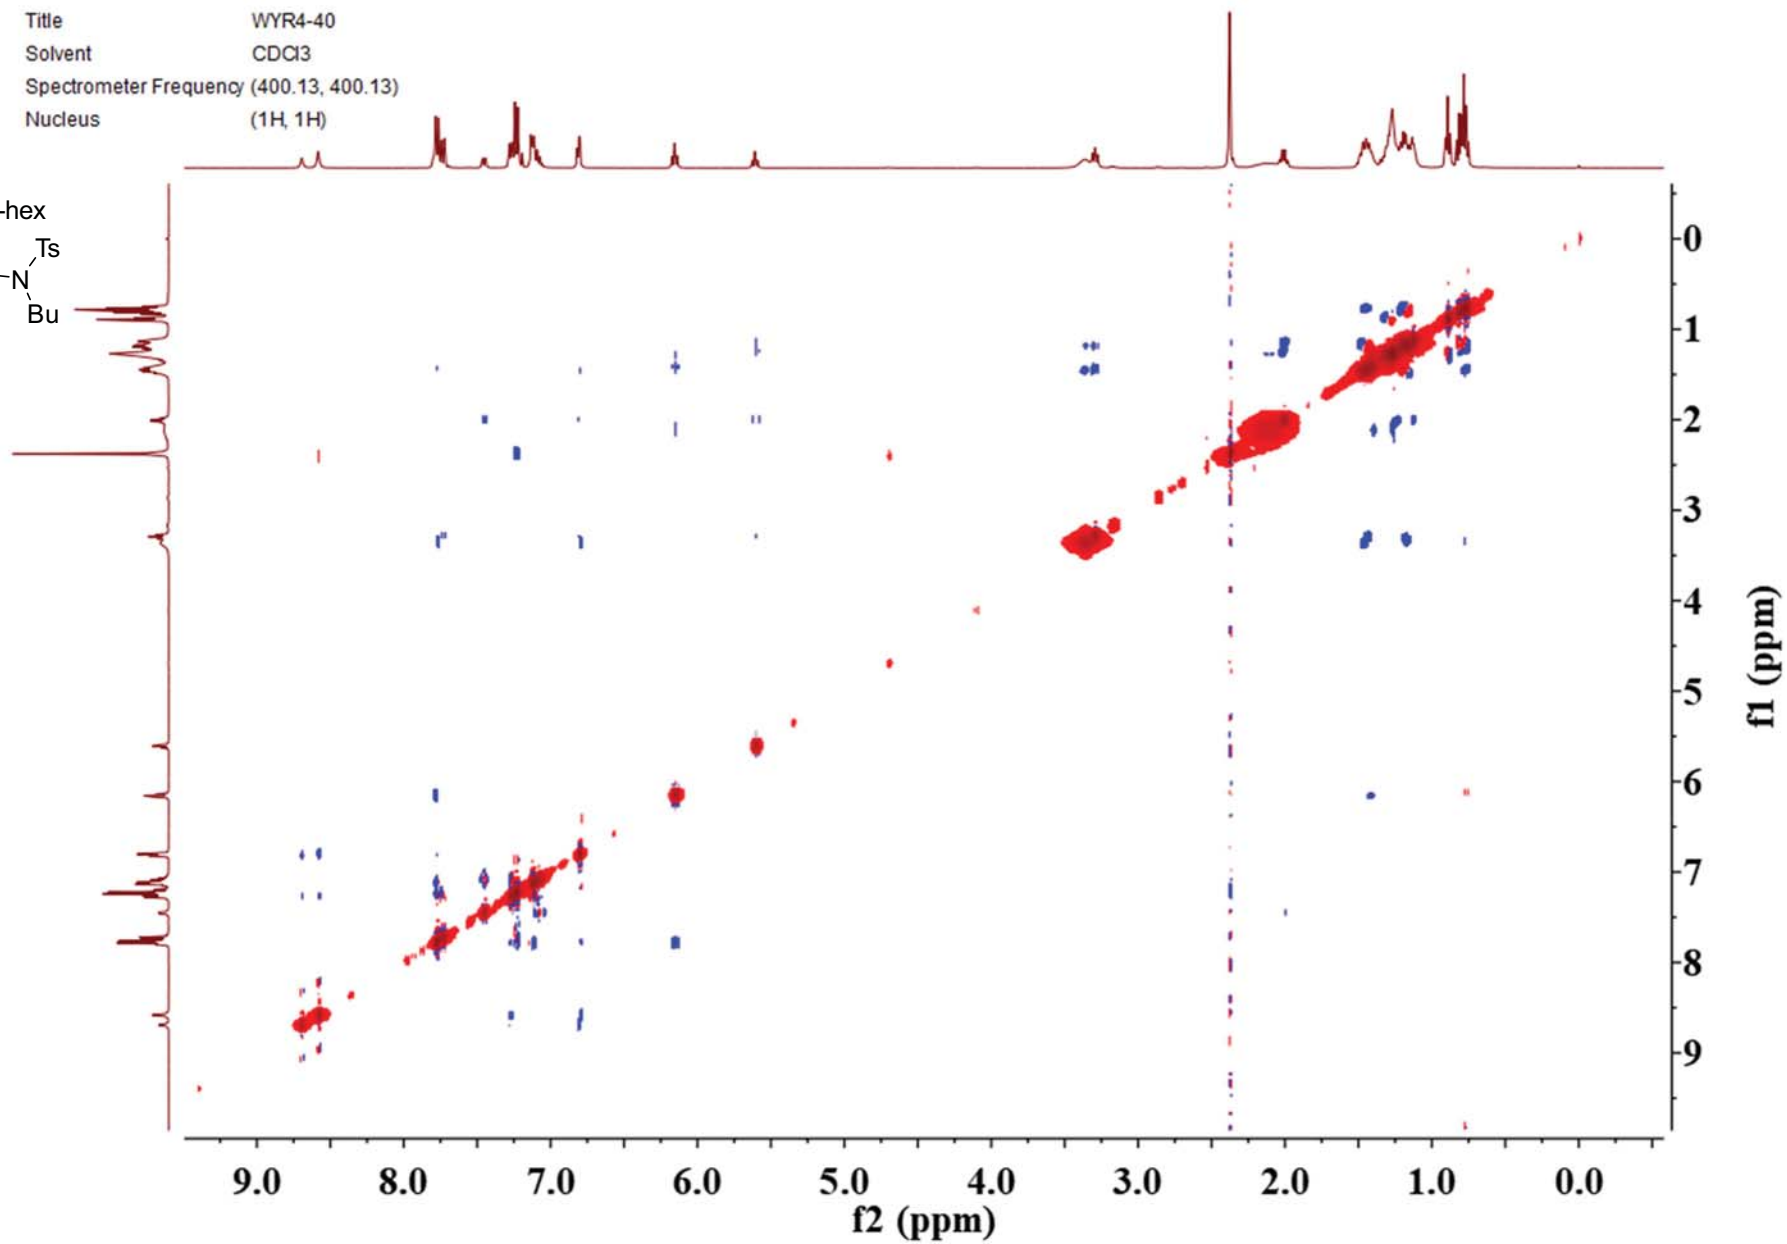

Title WYR4-40  
Solvent CDCl3  
Spectrometer Frequency (400.13, 400.13)  
Nucleus (1H, 1H)

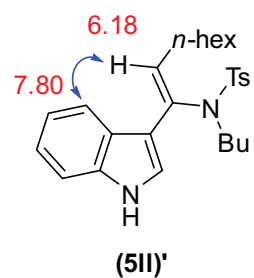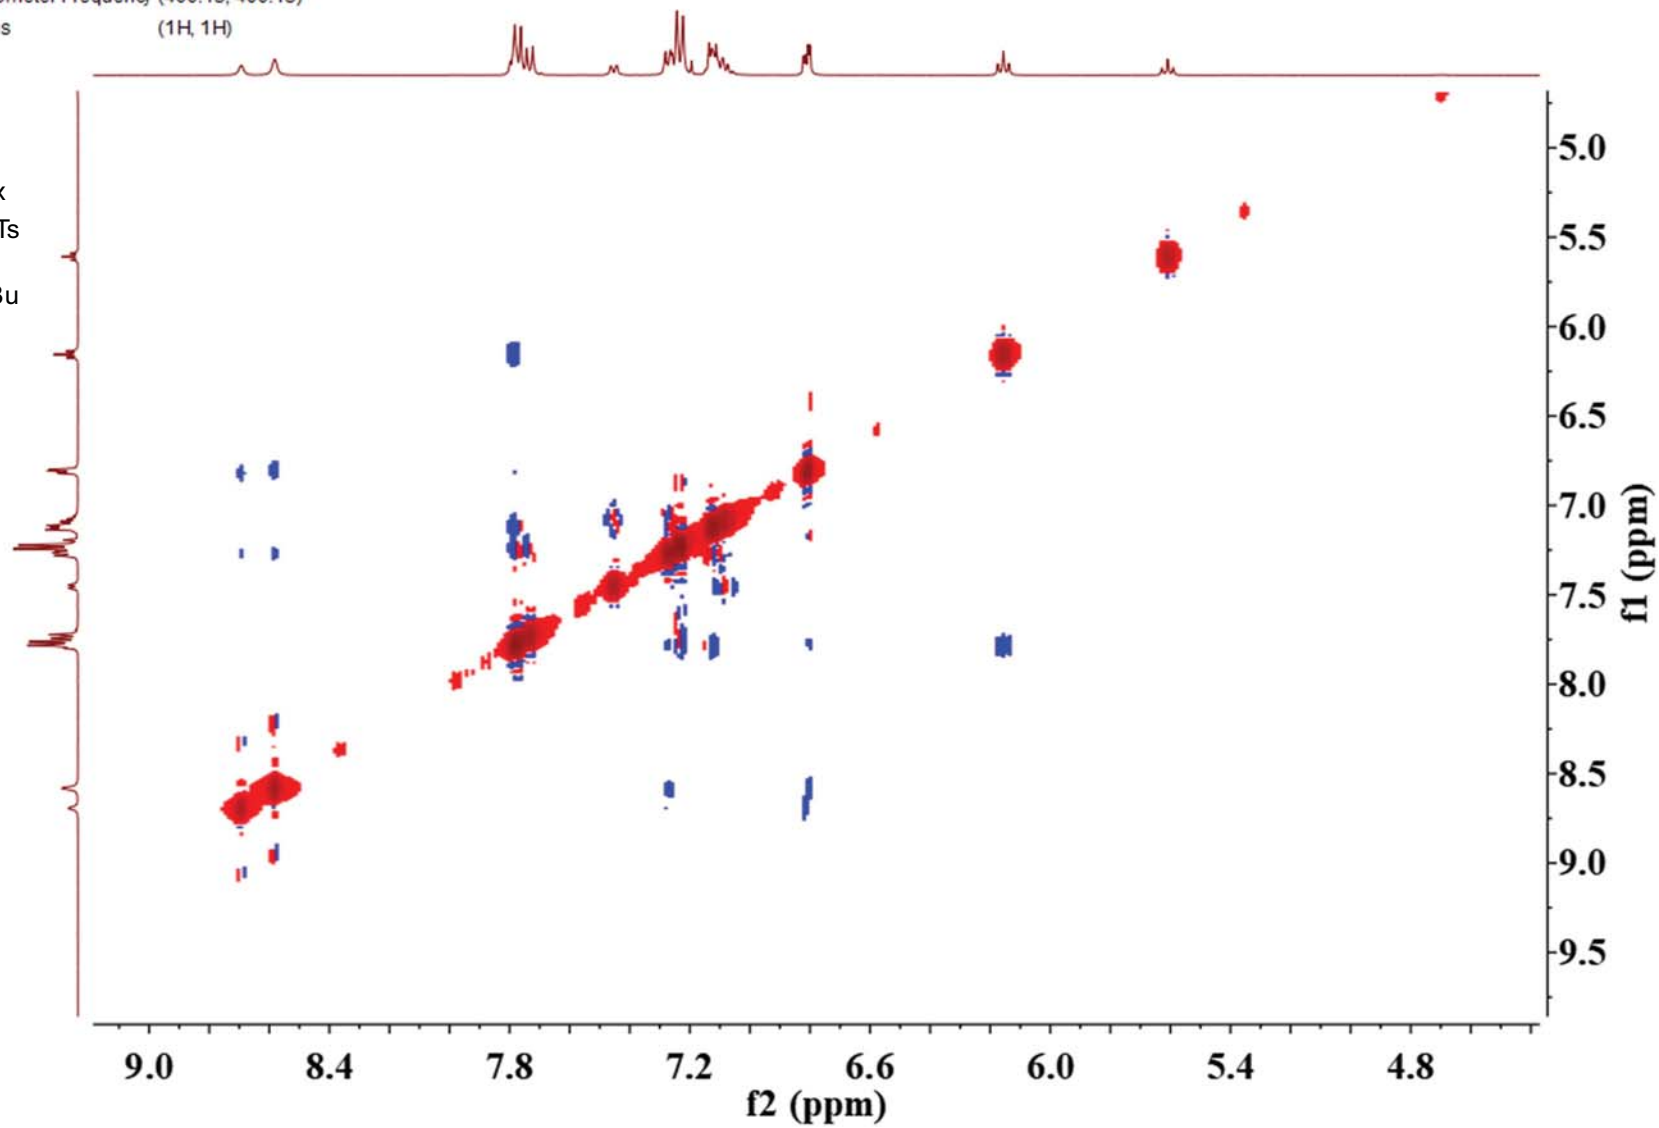

Supplement: d1qo01052b2.pdf [file d1qo01052b2.pdf]
